# Supplementary material for: Using genetics and proteomics data to identify proteins causally related to COVID-19, healthspan and lifespan: a Mendelian randomization study
Source: publisher site journal article supplement (doi:10.18632/aging.205711), 2024-04-03
Supplement: Supplementary file [file aging-v16i7-205711-supplementary-material-SD2.pdf]

**Supplementary Table 1. Genetic instruments for proteins used in the Mendelian randomization analysis.**

| Protein | SNP         | CHR | POS       | A1 | A2 | Frequency | BETA  | SE   | Pval      |
|---------|-------------|-----|-----------|----|----|-----------|-------|------|-----------|
| AARSD1  | rs1354034   | 3   | 56815721  | C  | T  | 0.60      | 0.07  | 0.01 | 4.11E-09  |
| AARSD1  | rs4759076   | 12  | 54336088  | C  | T  | 0.46      | 0.05  | 0.01 | 1.20E-05  |
| AARSD1  | rs323500    | 17  | 42988528  | T  | C  | 0.29      | 0.13  | 0.01 | 2.34E-28  |
| ABHD14B | rs373373105 | 3   | 51970081  | G  | C  | 0.01      | -1.44 | 0.04 | 1.36E-160 |
| ABHD14B | rs1354034   | 3   | 56815721  | C  | T  | 0.60      | 0.06  | 0.01 | 1.46E-06  |
| ABHD14B | rs6993770   | 8   | 105569300 | T  | A  | 0.29      | -0.06 | 0.01 | 2.11E-06  |
| ABHD14B | rs7080386   | 10  | 63288546  | A  | C  | 0.41      | 0.06  | 0.01 | 4.18E-07  |
| ABL1    | rs1354034   | 3   | 56815721  | C  | T  | 0.60      | 0.08  | 0.01 | 6.05E-13  |
| ACAA1   | rs156265    | 3   | 38129319  | G  | C  | 0.14      | -0.13 | 0.01 | 2.44E-14  |
| ACAA1   | rs4835265   | 4   | 145900258 | A  | C  | 0.16      | 0.09  | 0.01 | 3.51E-08  |
| ACAA1   | rs9953884   | 18  | 58426216  | C  | A  | 0.77      | -0.07 | 0.01 | 1.35E-07  |
| ACAN    | rs1337526   | 1   | 47499458  | G  | A  | 0.80      | 0.06  | 0.01 | 8.91E-06  |
| ACAN    | rs828602    | 3   | 98754474  | A  | G  | 0.41      | 0.07  | 0.01 | 2.69E-11  |
| ACAN    | rs11713838  | 3   | 119209644 | A  | C  | 0.27      | -0.05 | 0.01 | 2.56E-05  |
| ACAN    | rs6461354   | 7   | 17874977  | T  | C  | 0.39      | -0.05 | 0.01 | 1.91E-05  |
| ACAN    | rs12684083  | 9   | 76533675  | A  | G  | 0.24      | -0.10 | 0.01 | 1.03E-16  |
| ACAN    | rs2519093   | 9   | 133266456 | T  | C  | 0.18      | 0.09  | 0.01 | 2.04E-10  |
| ACAN    | rs56278466  | 10  | 17833858  | G  | T  | 0.66      | 0.06  | 0.01 | 5.54E-08  |
| ACAN    | rs11000138  | 10  | 72022264  | T  | A  | 0.39      | -0.19 | 0.01 | 4.11E-71  |
| ACAN    | rs895734    | 11  | 45662704  | T  | C  | 0.59      | 0.09  | 0.01 | 1.24E-16  |
| ACAN    | rs59379014  | 11  | 126358105 | T  | C  | 0.07      | 0.10  | 0.01 | 2.55E-06  |
| ACAN    | rs200201338 | 15  | 80948905  | T  | A  | 0.02      | 0.20  | 0.02 | 2.11E-08  |
| ACAN    | rs11073804  | 15  | 88708781  | A  | T  | 0.20      | 0.13  | 0.01 | 1.13E-23  |
| ACAN    | rs186021206 | 17  | 7166093   | A  | G  | 0.01      | 0.34  | 0.05 | 3.99E-06  |
| ACAN    | rs55639531  | 18  | 394341    | G  | C  | 0.29      | 0.07  | 0.01 | 3.50E-10  |
| ACAN    | rs17549173  | 19  | 35909329  | A  | G  | 0.07      | 0.11  | 0.01 | 1.75E-07  |
| ACE2    | rs1047891   | 2   | 210675783 | A  | C  | 0.31      | 0.05  | 0.01 | 1.59E-06  |
| ACE2    | rs9258643   | 6   | 29854294  | G  | A  | 0.16      | -0.08 | 0.01 | 1.18E-06  |
| ACE2    | rs112875651 | 8   | 125494452 | A  | G  | 0.39      | -0.08 | 0.01 | 3.80E-13  |
| ACE2    | rs11065385  | 12  | 120985583 | G  | A  | 0.69      | 0.14  | 0.01 | 1.60E-38  |
| ACE2    | rs72694393  | 14  | 24404987  | T  | G  | 0.48      | 0.06  | 0.01 | 7.68E-08  |
| ACE2    | rs28929474  | 14  | 94378610  | T  | C  | 0.02      | 0.21  | 0.02 | 6.48E-09  |
| ACE2    | rs550999044 | 14  | 103101069 | T  | A  | 0.24      | 0.07  | 0.01 | 1.05E-07  |
| ACE2    | rs340005    | 15  | 60585831  | A  | G  | 0.62      | 0.05  | 0.01 | 2.53E-05  |
| ACE2    | rs57909886  | 15  | 73681321  | C  | T  | 0.48      | 0.04  | 0.01 | 2.30E-05  |
| ACE2    | rs72787359  | 16  | 51397319  | C  | A  | 0.07      | -0.09 | 0.01 | 7.35E-06  |
| ACE2    | -           | 22  | 17968075  | T  | A  | 0.24      | -0.05 | 0.01 | 2.01E-05  |
| ACOX1   | rs10852766  | 17  | 75955783  | C  | T  | 0.66      | 0.07  | 0.01 | 2.27E-09  |
| ACP5    | rs61801010  | 1   | 161572445 | G  | A  | 0.11      | 0.11  | 0.01 | 4.06E-09  |
| ACP5    | rs150184782 | 8   | 104965640 | A  | C  | 0.18      | 0.08  | 0.01 | 1.61E-08  |
| ACP5    | rs10813949  | 9   | 33123466  | A  | G  | 0.31      | -0.06 | 0.01 | 1.53E-06  |
| ACP5    | rs2229498   | 10  | 69097096  | A  | G  | 0.83      | -0.06 | 0.01 | 1.70E-05  |
| ACP5    | rs35382467  | 11  | 128329388 | A  | G  | 0.10      | -0.10 | 0.01 | 2.64E-08  |
| ACP5    | rs117566084 | 12  | 101796743 | T  | C  | 0.01      | 0.36  | 0.03 | 9.06E-12  |
| ACP5    | rs10138671  | 14  | 65393374  | G  | A  | 0.61      | 0.06  | 0.01 | 3.60E-07  |
| ACP5    | rs2073333   | 14  | 94378225  | T  | C  | 0.25      | 0.11  | 0.01 | 2.26E-19  |
| ACP5    | rs78755089  | 16  | 79542724  | T  | G  | 0.08      | 0.11  | 0.01 | 1.79E-08  |
| ACP5    | rs186021206 | 17  | 7166093   | A  | G  | 0.01      | 0.34  | 0.05 | 4.44E-06  |
| ACP5    | rs2305799   | 19  | 11576536  | T  | C  | 0.12      | -0.50 | 0.01 | 2.35E-202 |
| ACP6    | rs2999719   | 1   | 38661844  | C  | T  | 0.93      | 0.25  | 0.02 | 6.79E-27  |
| ACP6    | rs77542178  | 1   | 119972409 | C  | T  | 0.02      | -0.19 | 0.03 | 5.57E-06  |
| ACP6    | rs2153463   | 1   | 147652507 | G  | T  | 0.70      | 1.01  | 0.01 | 0.00E+00  |
| ACTA2   | rs5786849   | 10  | 88993792  | A  | T  | 0.50      | -0.06 | 0.01 | 7.13E-09  |
| ACVRL1  | -           | 1   | 150776487 | T  | A  | 0.07      | -0.09 | 0.01 | 8.67E-06  |

|          |             |    |           |   |   |      |       |      |           |
|----------|-------------|----|-----------|---|---|------|-------|------|-----------|
| ACVRL1   | rs9264623   | 6  | 31270173  | C | T | 0.64 | -0.06 | 0.01 | 1.97E-07  |
| ACVRL1   | rs9411365   | 9  | 133242881 | G | C | 0.07 | 0.09  | 0.01 | 1.27E-05  |
| ACVRL1   | rs77709482  | 12 | 51914237  | C | T | 0.08 | 0.56  | 0.01 | 1.25E-176 |
| ACVRL1   | rs2837988   | 21 | 41247617  | A | C | 0.36 | 0.08  | 0.01 | 3.75E-13  |
| ACY1     | rs1260326   | 2  | 27508073  | C | T | 0.61 | -0.07 | 0.01 | 4.08E-10  |
| ACY1     | rs121912698 | 3  | 51988821  | T | C | 0.00 | -1.68 | 0.05 | 2.50E-96  |
| ACY1     | rs3747207   | 22 | 43928975  | A | G | 0.22 | 0.08  | 0.01 | 1.24E-08  |
| ADA      | rs140373387 | 2  | 162012424 | C | G | 0.00 | 0.43  | 0.05 | 1.86E-08  |
| ADA      | rs60757417  | 9  | 132989049 | G | C | 0.06 | -0.09 | 0.01 | 2.45E-05  |
| ADA      | rs597808    | 12 | 111535554 | G | A | 0.52 | -0.05 | 0.01 | 1.34E-06  |
| ADA      | rs11555566  | 20 | 44626579  | C | T | 0.06 | 1.27  | 0.02 | 0.00E+00  |
| ADA2     | rs72930772  | 2  | 202754954 | T | C | 0.33 | 0.08  | 0.01 | 2.10E-11  |
| ADA2     | rs148819155 | 3  | 158627192 | G | A | 0.00 | -0.43 | 0.06 | 1.65E-05  |
| ADA2     | rs71584289  | 4  | 105173363 | A | C | 0.35 | 0.06  | 0.01 | 1.52E-06  |
| ADA2     | rs2548999   | 5  | 132495366 | T | G | 0.66 | 0.05  | 0.01 | 1.78E-05  |
| ADA2     | rs535777    | 6  | 32609856  | C | G | 0.14 | 0.15  | 0.01 | 5.05E-22  |
| ADA2     | rs56278466  | 10 | 17833858  | G | T | 0.66 | 0.08  | 0.01 | 5.42E-12  |
| ADA2     | rs2051773   | 11 | 17343662  | G | A | 0.30 | 0.06  | 0.01 | 5.35E-07  |
| ADA2     | rs226379    | 12 | 9115989   | C | T | 0.35 | -0.05 | 0.01 | 1.50E-05  |
| ADA2     | rs117566084 | 12 | 101796743 | T | C | 0.01 | 0.31  | 0.04 | 3.44E-08  |
| ADA2     | rs3184504   | 12 | 111446804 | C | T | 0.52 | -0.13 | 0.01 | 3.73E-33  |
| ADA2     | rs145078947 | 14 | 93186629  | T | G | 0.00 | 0.58  | 0.07 | 9.72E-08  |
| ADA2     | rs186021206 | 17 | 7166093   | A | G | 0.01 | 0.67  | 0.05 | 4.59E-19  |
| ADA2     | rs737963    | 22 | 17228881  | C | T | 0.61 | 0.21  | 0.01 | 2.06E-73  |
| ADA2     | rs738409    | 22 | 43928847  | G | C | 0.22 | 0.08  | 0.01 | 2.84E-08  |
| ADAM15   | rs11589479  | 1  | 155060832 | A | G | 0.16 | 1.02  | 0.01 | 0.00E+00  |
| ADAM15   | rs146142570 | 3  | 50316856  | A | G | 0.00 | 0.53  | 0.06 | 1.48E-07  |
| ADAM15   | rs77468121  | 6  | 31377707  | A | G | 0.04 | 0.12  | 0.01 | 3.83E-07  |
| ADAM15   | rs62571868  | 9  | 110363931 | T | A | 0.23 | 0.05  | 0.01 | 5.39E-06  |
| ADAM15   | rs8176759   | 9  | 133254260 | A | G | 0.06 | 0.51  | 0.01 | 2.35E-152 |
| ADAM15   | rs56278466  | 10 | 17833858  | G | T | 0.66 | 0.04  | 0.01 | 2.27E-05  |
| ADAM15   | rs3184504   | 12 | 111446804 | C | T | 0.52 | -0.06 | 0.01 | 2.99E-11  |
| ADAM15   | rs186021206 | 17 | 7166093   | A | G | 0.01 | 0.69  | 0.04 | 6.29E-28  |
| ADAM22   | rs61747728  | 1  | 179557079 | T | C | 0.04 | 0.17  | 0.02 | 7.29E-10  |
| ADAM22   | rs75166367  | 2  | 162107791 | A | G | 0.06 | -0.11 | 0.01 | 6.48E-07  |
| ADAM22   | rs2279542   | 7  | 87935182  | G | C | 0.51 | -0.56 | 0.01 | 0.00E+00  |
| ADAM22   | rs4997081   | 16 | 20353912  | C | G | 0.19 | -0.07 | 0.01 | 2.33E-07  |
| ADAM22   | rs186021206 | 17 | 7166093   | A | G | 0.01 | 0.33  | 0.05 | 4.49E-06  |
| ADAM22   | rs2659005   | 17 | 81244914  | T | C | 0.44 | 0.05  | 0.01 | 2.97E-06  |
| ADAM23   | rs61747728  | 1  | 179557079 | T | C | 0.04 | 0.12  | 0.02 | 9.10E-07  |
| ADAM23   | rs72933203  | 2  | 206446625 | A | T | 0.10 | 0.88  | 0.01 | 0.00E+00  |
| ADAM23   | rs1294438   | 6  | 6751826   | T | C | 0.36 | 0.06  | 0.01 | 7.76E-08  |
| ADAM23   | rs8176741   | 9  | 133256074 | A | G | 0.06 | 0.22  | 0.01 | 8.82E-29  |
| ADAM23   | rs777834943 | 16 | 20355409  | T | C | 0.18 | -0.05 | 0.01 | 2.01E-05  |
| ADAM23   | rs186021206 | 17 | 7166093   | A | G | 0.01 | 0.48  | 0.04 | 3.80E-13  |
| ADAM23   | -           | 19 | 41439217  | C | T | 0.39 | -0.07 | 0.01 | 1.35E-12  |
| ADAM8    | -           | 1  | 25567436  | A | T | 0.46 | 0.07  | 0.01 | 1.88E-10  |
| ADAM8    | rs2596530   | 6  | 31419596  | A | G | 0.49 | -0.06 | 0.01 | 1.22E-08  |
| ADAM8    | -           | 9  | 134957079 | G | T | 0.25 | 0.06  | 0.01 | 2.66E-05  |
| ADAM8    | rs2995310   | 10 | 133269306 | T | C | 0.89 | -0.70 | 0.01 | 0.00E+00  |
| ADAM8    | rs4055121   | 11 | 126362442 | T | C | 0.14 | -0.09 | 0.01 | 8.03E-08  |
| ADAM8    | rs7137828   | 12 | 111494996 | T | C | 0.52 | -0.11 | 0.01 | 1.79E-23  |
| ADAM8    | rs76428106  | 13 | 28029870  | C | T | 0.01 | 0.25  | 0.03 | 7.55E-07  |
| ADAM8    | rs186021206 | 17 | 7166093   | A | G | 0.01 | 0.58  | 0.05 | 7.92E-15  |
| ADAM8    | rs2227319   | 17 | 40014592  | A | G | 0.37 | -0.08 | 0.01 | 1.09E-11  |
| ADAMTS13 | rs11709284  | 3  | 52525689  | A | G | 0.56 | 0.05  | 0.01 | 2.48E-05  |

|          |             |    |           |   |   |      |       |      |           |
|----------|-------------|----|-----------|---|---|------|-------|------|-----------|
| ADAMTS13 | rs5023357   | 4  | 123849638 | G | T | 0.11 | 0.10  | 0.01 | 4.69E-09  |
| ADAMTS13 | -           | 4  | 174155491 | T | A | 0.46 | 0.05  | 0.01 | 1.12E-06  |
| ADAMTS13 | rs2910686   | 5  | 96916885  | C | T | 0.45 | 0.07  | 0.01 | 8.82E-12  |
| ADAMTS13 | rs9264275   | 6  | 31256777  | T | C | 0.74 | 0.06  | 0.01 | 5.10E-06  |
| ADAMTS13 | rs143073120 | 6  | 147344800 | T | C | 0.56 | -0.05 | 0.01 | 5.19E-06  |
| ADAMTS13 | rs10253113  | 7  | 130369470 | G | A | 0.31 | 0.07  | 0.01 | 9.32E-09  |
| ADAMTS13 | rs9987289   | 8  | 9325848   | G | A | 0.91 | -0.10 | 0.01 | 5.17E-07  |
| ADAMTS13 | rs74715985  | 9  | 133438993 | G | A | 0.02 | -1.44 | 0.03 | 1.86E-246 |
| ADAMTS13 | rs112814955 | 12 | 6116765   | A | G | 0.07 | 0.09  | 0.01 | 1.57E-05  |
| ADAMTS13 | rs1389065   | 12 | 91384364  | A | G | 0.76 | -0.06 | 0.01 | 2.74E-05  |
| ADAMTS13 | rs746775574 | 12 | 104577022 | T | G | 0.09 | -0.10 | 0.01 | 7.02E-08  |
| ADAMTS13 | rs56254331  | 19 | 41320115  | C | A | 0.17 | 0.07  | 0.01 | 6.45E-06  |
| ADAMTS13 | rs2236251   | 20 | 17616400  | T | C | 0.76 | 0.05  | 0.01 | 2.42E-05  |
| ADAMTS13 | rs738408    | 22 | 43928850  | T | C | 0.22 | 0.06  | 0.01 | 1.37E-06  |
| ADAMTS15 | rs5030062   | 3  | 186736391 | C | A | 0.37 | -0.06 | 0.01 | 9.74E-08  |
| ADAMTS15 | rs4861708   | 4  | 186236079 | A | G | 0.51 | -0.12 | 0.01 | 3.48E-27  |
| ADAMTS15 | rs2545801   | 5  | 177414338 | C | T | 0.74 | -0.09 | 0.01 | 6.22E-13  |
| ADAMTS15 | rs73044885  | 11 | 130474168 | A | G | 0.05 | 0.19  | 0.02 | 6.20E-13  |
| ADAMTS15 | rs186021206 | 17 | 7166093   | A | G | 0.01 | 0.53  | 0.05 | 4.38E-11  |
| ADAMTS16 | rs547625232 | 1  | 207337659 | A | T | 0.45 | -0.05 | 0.01 | 2.86E-06  |
| ADAMTS16 | rs40468     | 5  | 4982701   | G | A | 0.34 | -0.12 | 0.01 | 9.03E-27  |
| ADAMTS8  | rs7529464   | 1  | 230277090 | C | G | 0.25 | 0.07  | 0.01 | 4.14E-08  |
| ADAMTS8  | rs13107325  | 4  | 102267552 | T | C | 0.08 | -0.14 | 0.01 | 6.39E-13  |
| ADAMTS8  | rs2131535   | 11 | 130411593 | A | G | 0.73 | 0.49  | 0.01 | 0.00E+00  |
| ADAMTS8  | rs7209484   | 17 | 48065680  | C | T | 0.24 | 0.06  | 0.01 | 9.69E-07  |
| ADGRB3   | rs1260326   | 2  | 27508073  | C | T | 0.61 | 0.03  | 0.01 | 1.41E-05  |
| ADGRB3   | rs3798969   | 6  | 68961693  | G | A | 0.62 | -0.94 | 0.01 | 0.00E+00  |
| ADGRB3   | rs7952602   | 11 | 126363774 | C | G | 0.13 | -0.05 | 0.01 | 2.17E-05  |
| ADGRB3   | rs200489612 | 17 | 7203059   | A | G | 0.01 | 0.32  | 0.04 | 2.76E-08  |
| ADGRB3   | rs573431210 | 17 | 69280242  | G | T | 0.03 | 0.12  | 0.02 | 1.04E-06  |
| ADGRE2   | rs61801010  | 1  | 161572445 | G | A | 0.11 | 0.10  | 0.01 | 5.28E-08  |
| ADGRE2   | rs1260326   | 2  | 27508073  | C | T | 0.61 | 0.05  | 0.01 | 4.43E-06  |
| ADGRE2   | rs34452456  | 6  | 32482901  | C | T | 0.33 | 0.06  | 0.01 | 1.09E-06  |
| ADGRE2   | rs56278466  | 10 | 17833858  | G | T | 0.66 | 0.12  | 0.01 | 1.38E-26  |
| ADGRE2   | rs950802    | 11 | 60385111  | A | G | 0.31 | -0.06 | 0.01 | 5.82E-07  |
| ADGRE2   | rs78689694  | 11 | 126364925 | C | G | 0.13 | -0.07 | 0.01 | 1.39E-05  |
| ADGRE2   | rs3184504   | 12 | 111446804 | C | T | 0.52 | -0.10 | 0.01 | 3.16E-20  |
| ADGRE2   | rs186021206 | 17 | 7166093   | A | G | 0.01 | 1.09  | 0.05 | 2.77E-50  |
| ADGRE2   | rs7251607   | 19 | 14396179  | C | A | 0.75 | 0.29  | 0.01 | 4.41E-115 |
| ADGRE5   | rs61801010  | 1  | 161572445 | G | A | 0.11 | 0.10  | 0.01 | 1.00E-07  |
| ADGRE5   | rs1260326   | 2  | 27508073  | C | T | 0.61 | 0.05  | 0.01 | 3.75E-06  |
| ADGRE5   | rs199866843 | 3  | 99039510  | A | T | 0.64 | 0.05  | 0.01 | 2.28E-05  |
| ADGRE5   | rs10093     | 6  | 32641396  | G | C | 0.38 | 0.06  | 0.01 | 4.16E-08  |
| ADGRE5   | rs56278466  | 10 | 17833858  | G | T | 0.66 | 0.14  | 0.01 | 1.75E-33  |
| ADGRE5   | rs950802    | 11 | 60385111  | A | G | 0.31 | -0.07 | 0.01 | 3.72E-08  |
| ADGRE5   | rs78689694  | 11 | 126364925 | C | G | 0.13 | -0.07 | 0.01 | 2.19E-05  |
| ADGRE5   | rs3184504   | 12 | 111446804 | C | T | 0.52 | -0.10 | 0.01 | 1.44E-21  |
| ADGRE5   | rs186021206 | 17 | 7166093   | A | G | 0.01 | 1.17  | 0.05 | 1.44E-56  |
| ADGRE5   | rs139113505 | 19 | 14388804  | T | C | 0.02 | -0.71 | 0.03 | 2.29E-63  |
| ADGRE5   | rs6065904   | 20 | 45906012  | A | G | 0.22 | 0.07  | 0.01 | 6.09E-07  |
| ADGRG1   | rs1047891   | 2  | 210675783 | A | C | 0.31 | 0.06  | 0.01 | 2.14E-07  |
| ADGRG1   | rs10935473  | 3  | 98698056  | T | G | 0.44 | -0.08 | 0.01 | 2.45E-12  |
| ADGRG1   | rs916951    | 5  | 136048754 | G | A | 0.51 | 0.05  | 0.01 | 4.13E-06  |
| ADGRG1   | rs28393425  | 6  | 32484785  | G | A | 0.18 | -0.07 | 0.01 | 8.84E-07  |
| ADGRG1   | rs2519093   | 9  | 133266456 | T | C | 0.18 | -0.11 | 0.01 | 1.98E-15  |
| ADGRG1   | rs56278466  | 10 | 17833858  | G | T | 0.66 | 0.13  | 0.01 | 1.35E-31  |

|        |             |    |           |   |   |      |       |      |           |
|--------|-------------|----|-----------|---|---|------|-------|------|-----------|
| ADGRG1 | rs376888155 | 11 | 86623516  | A | G | 0.31 | -0.07 | 0.01 | 6.17E-08  |
| ADGRG1 | rs3184504   | 12 | 111446804 | C | T | 0.52 | -0.08 | 0.01 | 2.21E-13  |
| ADGRG1 | rs733464    | 16 | 57648363  | T | C | 0.41 | 0.07  | 0.01 | 1.75E-10  |
| ADGRG1 | rs186021206 | 17 | 7166093   | A | G | 0.01 | 0.47  | 0.05 | 8.64E-10  |
| ADGRG1 | rs738409    | 22 | 43928847  | G | C | 0.22 | 0.06  | 0.01 | 3.93E-06  |
| ADGRG2 | rs755740174 | 1  | 59192759  | A | T | 0.29 | 0.08  | 0.01 | 1.41E-10  |
| ADGRG2 | rs13107325  | 4  | 102267552 | T | C | 0.08 | 0.10  | 0.01 | 1.07E-06  |
| ADGRG2 | rs115912456 | 5  | 83519339  | G | A | 0.04 | -0.15 | 0.02 | 4.43E-08  |
| ADGRG2 | rs7836422   | 8  | 38992502  | T | C | 0.39 | 0.07  | 0.01 | 4.51E-12  |
| ADGRG2 | -           | 9  | 98800544  | C | T | 0.10 | 0.08  | 0.01 | 8.71E-06  |
| ADGRG2 | rs8176719   | 9  | 133257521 | C | T | 0.34 | 0.05  | 0.01 | 1.08E-05  |
| ADGRG2 | rs74612335  | 11 | 126368738 | C | T | 0.13 | -0.09 | 0.01 | 3.66E-09  |
| ADGRG2 | rs186021206 | 17 | 7166093   | A | G | 0.01 | 0.52  | 0.05 | 4.39E-13  |
| ADH4   | rs1800759   | 4  | 99144358  | G | T | 0.61 | 0.13  | 0.01 | 1.07E-30  |
| ADH4   | rs112875651 | 8  | 125494452 | A | G | 0.39 | -0.05 | 0.01 | 4.19E-06  |
| ADH4   | rs4979372   | 9  | 114377802 | C | T | 0.49 | -0.06 | 0.01 | 1.26E-08  |
| ADH4   | rs10883451  | 10 | 100164661 | C | T | 0.50 | -0.05 | 0.01 | 4.44E-06  |
| ADH4   | rs11604580  | 11 | 94119714  | A | G | 0.11 | -0.08 | 0.01 | 2.47E-05  |
| ADH4   | rs3747207   | 22 | 43928975  | A | G | 0.22 | 0.10  | 0.01 | 7.75E-14  |
| ADM    | rs150777506 | 2  | 162200414 | G | T | 0.01 | -0.51 | 0.03 | 8.66E-22  |
| ADM    | rs9264638   | 6  | 31270541  | A | G | 0.64 | -0.05 | 0.01 | 1.59E-05  |
| ADM    | rs2403310   | 11 | 10341724  | C | G | 0.47 | 0.16  | 0.01 | 5.41E-51  |
| AFP    | rs12059956  | 1  | 171094121 | A | G | 0.42 | -0.05 | 0.01 | 1.67E-05  |
| AFP    | rs4149909   | 1  | 241860596 | G | A | 0.03 | -0.14 | 0.02 | 5.31E-06  |
| AFP    | rs11900031  | 2  | 17749607  | G | A | 0.11 | -0.42 | 0.01 | 5.03E-128 |
| AFP    | rs3018026   | 2  | 67428185  | T | C | 0.69 | -0.09 | 0.01 | 2.28E-13  |
| AFP    | -           | 3  | 8929643   | A | T | 0.76 | 0.09  | 0.01 | 3.11E-12  |
| AFP    | rs62280667  | 3  | 101365760 | C | T | 0.34 | -0.13 | 0.01 | 6.44E-31  |
| AFP    | rs59950280  | 4  | 3450618   | A | G | 0.33 | 0.09  | 0.01 | 8.51E-15  |
| AFP    | rs12506899  | 4  | 73453566  | G | T | 0.40 | -0.19 | 0.01 | 1.67E-67  |
| AFP    | rs2602874   | 4  | 99118245  | T | A | 0.58 | -0.07 | 0.01 | 2.23E-11  |
| AFP    | rs796736099 | 6  | 42956957  | A | T | 0.45 | -0.05 | 0.01 | 2.41E-05  |
| AFP    | rs4732620   | 8  | 28067687  | C | T | 0.55 | -0.05 | 0.01 | 2.16E-05  |
| AFP    | rs62576492  | 9  | 132343321 | G | A | 0.11 | 0.14  | 0.01 | 8.14E-16  |
| AFP    | rs35751397  | 10 | 63154256  | A | T | 0.47 | -0.05 | 0.01 | 3.06E-06  |
| AFP    | rs10883567  | 10 | 100996022 | C | T | 0.49 | -0.06 | 0.01 | 2.92E-08  |
| AFP    | -           | 11 | 1665769   | C | G | 0.22 | -0.09 | 0.01 | 1.08E-11  |
| AFP    | rs11418587  | 11 | 108236534 | A | T | 0.33 | 0.07  | 0.01 | 3.55E-07  |
| AFP    | rs7310409   | 12 | 120987058 | G | A | 0.62 | 0.10  | 0.01 | 2.47E-22  |
| AFP    | rs145058546 | 15 | 29269402  | C | T | 0.00 | -0.42 | 0.06 | 2.38E-05  |
| AFP    | rs560191    | 15 | 43475576  | C | G | 0.30 | 0.12  | 0.01 | 2.92E-26  |
| AFP    | rs144268704 | 15 | 63500022  | T | A | 0.34 | 0.06  | 0.01 | 7.68E-07  |
| AFP    | rs17689024  | 16 | 79706081  | C | G | 0.31 | -0.05 | 0.01 | 4.21E-06  |
| AFP    | rs11642010  | 16 | 89778703  | C | T | 0.09 | -0.08 | 0.01 | 8.58E-06  |
| AFP    | -           | 17 | 35934977  | T | A | 0.15 | 0.09  | 0.01 | 6.55E-09  |
| AFP    | rs4794048   | 17 | 47685707  | C | A | 0.48 | 0.07  | 0.01 | 2.67E-11  |
| AFP    | rs34349423  | 17 | 49782701  | C | A | 0.63 | -0.06 | 0.01 | 6.56E-07  |
| AFP    | rs1801689   | 17 | 66214462  | C | A | 0.03 | -0.17 | 0.02 | 1.07E-07  |
| AFP    | rs35103294  | 17 | 75814856  | T | C | 0.63 | 0.05  | 0.01 | 6.99E-06  |
| AFP    | rs2548458   | 19 | 48706068  | T | C | 0.54 | -0.05 | 0.01 | 5.11E-06  |
| AFP    | rs6116934   | 20 | 5751157   | C | T | 0.22 | 0.09  | 0.01 | 2.49E-13  |
| AFP    | -           | 20 | 32267968  | C | T | 0.17 | -0.07 | 0.01 | 1.94E-06  |
| AFP    | rs6007594   | 22 | 45332489  | A | G | 0.26 | 0.13  | 0.01 | 7.93E-29  |
| AGER   | rs66906568  | 1  | 10662242  | C | T | 0.30 | -0.07 | 0.01 | 3.23E-09  |
| AGER   | rs10753239  | 1  | 30889377  | C | T | 0.46 | -0.05 | 0.01 | 3.59E-06  |
| AGER   | rs1289813   | 1  | 117279693 | A | G | 0.28 | 0.05  | 0.01 | 1.85E-05  |

|      |             |    |           |   |   |      |       |      |           |
|------|-------------|----|-----------|---|---|------|-------|------|-----------|
| AGER | rs6664840   | 1  | 175159590 | G | A | 0.47 | -0.07 | 0.01 | 3.66E-11  |
| AGER | rs2137715   | 4  | 89089309  | C | A | 0.39 | 0.07  | 0.01 | 1.14E-08  |
| AGER | rs13186378  | 5  | 52975201  | G | C | 0.32 | 0.07  | 0.01 | 6.07E-10  |
| AGER | rs204993    | 6  | 32187804  | G | A | 0.32 | -0.17 | 0.01 | 5.62E-47  |
| AGER | rs7820838   | 8  | 32548461  | C | T | 0.78 | 0.07  | 0.01 | 7.75E-08  |
| AGER | rs11243421  | 9  | 131550651 | C | T | 0.56 | -0.13 | 0.01 | 5.80E-32  |
| AGER | rs2487928   | 10 | 30034963  | A | G | 0.45 | -0.05 | 0.01 | 3.79E-06  |
| AGER | rs3028371   | 10 | 69496320  | C | T | 0.53 | -0.05 | 0.01 | 1.49E-05  |
| AGER | rs35393359  | 12 | 514290    | T | C | 0.17 | -0.09 | 0.01 | 2.73E-10  |
| AGER | rs11407068  | 12 | 10091655  | A | T | 0.78 | 0.06  | 0.01 | 5.03E-06  |
| AGER | rs1896354   | 12 | 114935160 | G | A | 0.43 | 0.07  | 0.01 | 6.52E-09  |
| AGER | rs55703124  | 13 | 109270326 | C | T | 0.73 | -0.06 | 0.01 | 1.08E-06  |
| AGER | rs10152355  | 15 | 58378979  | A | C | 0.45 | 0.07  | 0.01 | 1.74E-08  |
| AGER | rs34262842  | 16 | 20344489  | G | A | 0.17 | -0.07 | 0.01 | 1.29E-05  |
| AGER | -           | 19 | 32102546  | G | A | 0.69 | 0.06  | 0.01 | 3.57E-06  |
| AGR2 | rs115317719 | 6  | 32444228  | T | G | 0.19 | 0.07  | 0.01 | 7.27E-07  |
| AGR2 | rs7807123   | 7  | 16816925  | T | C | 0.57 | 0.10  | 0.01 | 4.13E-19  |
| AGR2 | rs7826120   | 8  | 58459166  | C | T | 0.67 | 0.06  | 0.01 | 1.91E-07  |
| AGR2 | rs28633254  | 11 | 1199373   | C | T | 0.42 | -0.06 | 0.01 | 3.91E-06  |
| AGR2 | rs601338    | 19 | 48703417  | A | G | 0.51 | -0.06 | 0.01 | 6.23E-07  |
| AGR3 | rs58198139  | 5  | 156972028 | T | C | 0.64 | 0.08  | 0.01 | 6.94E-11  |
| AGR3 | rs9271956   | 6  | 32629536  | C | T | 0.83 | 0.07  | 0.01 | 1.04E-05  |
| AGR3 | rs34954997  | 19 | 44914381  | G | C | 0.24 | 0.08  | 0.01 | 1.10E-08  |
| AGR3 | rs12983058  | 19 | 51139527  | T | G | 0.33 | -0.05 | 0.01 | 1.61E-05  |
| AGRN | rs3121560   | 1  | 1032846   | A | C | 0.34 | -0.37 | 0.01 | 8.16E-226 |
| AGRN | rs551319785 | 3  | 49942496  | C | A | 0.14 | 0.09  | 0.01 | 5.25E-07  |
| AGRN | rs13107325  | 4  | 102267552 | T | C | 0.08 | 0.09  | 0.01 | 1.13E-05  |
| AGRN | rs7654228   | 4  | 118378823 | C | T | 0.41 | -0.09 | 0.01 | 7.38E-15  |
| AGRN | rs4240624   | 8  | 9326721   | A | G | 0.91 | -0.09 | 0.01 | 1.94E-06  |
| AGRN | rs1149605   | 11 | 76774172  | C | T | 0.17 | -0.09 | 0.01 | 3.25E-09  |
| AGRN | rs6061230   | 20 | 62371133  | T | A | 0.36 | 0.11  | 0.01 | 2.28E-23  |
| AGRP | rs12239737  | 1  | 62620330  | A | T | 0.34 | -0.05 | 0.01 | 6.81E-06  |
| AGRP | rs1260326   | 2  | 27508073  | C | T | 0.61 | -0.05 | 0.01 | 4.55E-06  |
| AGRP | rs778393561 | 6  | 32657458  | G | A | 0.35 | -0.08 | 0.01 | 3.92E-09  |
| AGRP | rs56393506  | 6  | 160668275 | T | C | 0.17 | 0.09  | 0.01 | 3.24E-09  |
| AGRP | rs76722925  | 8  | 20073987  | G | A | 0.08 | -0.11 | 0.01 | 4.58E-08  |
| AGRP | -           | 8  | 125492141 | C | T | 0.60 | -0.08 | 0.01 | 6.96E-10  |
| AGRP | rs1570581   | 9  | 124471780 | G | A | 0.47 | 0.05  | 0.01 | 1.05E-05  |
| AGRP | rs964184    | 11 | 116778201 | C | G | 0.87 | -0.15 | 0.01 | 8.03E-20  |
| AGRP | rs188707867 | 16 | 67481485  | G | C | 0.01 | -0.46 | 0.05 | 4.74E-11  |
| AGRP | rs740516    | 17 | 69086821  | G | C | 0.15 | -0.07 | 0.01 | 1.48E-05  |
| AGRP | rs34954997  | 19 | 44914381  | G | C | 0.24 | 0.12  | 0.01 | 9.54E-22  |
| AGXT | rs1497406   | 1  | 16178825  | G | A | 0.58 | 0.06  | 0.01 | 1.61E-08  |
| AGXT | rs4361977   | 1  | 155103603 | T | C | 0.43 | -0.06 | 0.01 | 1.23E-07  |
| AGXT | rs55649245  | 2  | 240854128 | A | G | 0.31 | -0.28 | 0.01 | 1.29E-123 |
| AGXT | rs4835265   | 4  | 145900258 | A | C | 0.16 | 0.13  | 0.01 | 7.17E-17  |
| AGXT | rs6888304   | 5  | 31020414  | G | A | 0.28 | -0.05 | 0.01 | 2.38E-05  |
| AGXT | rs112875651 | 8  | 125494452 | A | G | 0.39 | -0.05 | 0.01 | 4.61E-06  |
| AGXT | rs10883451  | 10 | 100164661 | C | T | 0.50 | -0.05 | 0.01 | 4.78E-06  |
| AGXT | rs28929474  | 14 | 94378610  | T | C | 0.02 | 0.19  | 0.03 | 8.31E-07  |
| AGXT | rs9959832   | 18 | 58419588  | T | C | 0.80 | -0.10 | 0.01 | 7.22E-13  |
| AGXT | rs10405357  | 19 | 54255803  | C | T | 0.44 | -0.06 | 0.01 | 1.38E-06  |
| AGXT | rs3747207   | 22 | 43928975  | A | G | 0.22 | 0.08  | 0.01 | 6.43E-09  |
| AHCY | rs142714816 | 4  | 73408646  | G | A | 0.00 | 0.87  | 0.13 | 2.82E-05  |
| AHCY | rs13043752  | 20 | 34295502  | A | G | 0.02 | -1.36 | 0.03 | 3.72E-201 |
| AHSP | rs875741    | 5  | 173860848 | A | G | 0.41 | -0.05 | 0.01 | 3.35E-06  |

|         |             |    |           |   |   |      |       |      |          |
|---------|-------------|----|-----------|---|---|------|-------|------|----------|
| AHSP    | rs80215559  | 6  | 25917997  | C | T | 0.08 | 0.13  | 0.01 | 4.92E-11 |
| AHSP    | rs11759553  | 6  | 135101158 | T | A | 0.27 | -0.06 | 0.01 | 6.60E-06 |
| AHSP    | rs590856    | 6  | 139523292 | A | G | 0.55 | -0.08 | 0.01 | 5.72E-13 |
| AHSP    | rs6592965   | 7  | 50360284  | A | G | 0.45 | -0.06 | 0.01 | 3.67E-09 |
| AHSP    | rs10742583  | 11 | 5227411   | A | G | 0.85 | 0.12  | 0.01 | 2.49E-14 |
| AHSP    | rs7194649   | 16 | 165107    | A | C | 0.11 | -0.12 | 0.01 | 5.84E-12 |
| AHSP    | rs771133280 | 17 | 28843137  | T | C | 0.20 | 0.08  | 0.01 | 2.03E-08 |
| AHSP    | rs570223913 | 17 | 76382231  | G | T | 0.47 | -0.11 | 0.01 | 3.31E-25 |
| AHSP    | rs390408    | 22 | 21557983  | G | A | 0.82 | 0.09  | 0.01 | 6.08E-10 |
| AHSP    | rs855791    | 22 | 37066896  | G | A | 0.56 | 0.08  | 0.01 | 2.19E-13 |
| AIF1    | rs2261033   | 6  | 31635814  | G | A | 0.43 | -0.11 | 0.01 | 6.29E-21 |
| AIFM1   | rs1354034   | 3  | 56815721  | C | T | 0.60 | 0.06  | 0.01 | 2.37E-06 |
| AIFM1   | rs342293    | 7  | 106731773 | G | C | 0.46 | -0.05 | 0.01 | 2.78E-05 |
| AKR1B1  | rs2229542   | 7  | 134450869 | C | T | 0.01 | -0.58 | 0.03 | 5.92E-31 |
| AKR1B1  | rs6993770   | 8  | 105569300 | T | A | 0.29 | -0.06 | 0.01 | 1.47E-06 |
| AKR1B1  | rs72481564  | 14 | 105886393 | T | C | 0.23 | 0.08  | 0.01 | 7.00E-07 |
| AKR1C4  | rs11253048  | 10 | 5219196   | G | A | 0.18 | -0.07 | 0.01 | 1.73E-05 |
| AKT1S1  | rs1354034   | 3  | 56815721  | C | T | 0.60 | 0.07  | 0.01 | 6.43E-09 |
| AKT1S1  | rs342293    | 7  | 106731773 | G | C | 0.46 | -0.06 | 0.01 | 1.14E-06 |
| AKT1S1  | rs10733789  | 10 | 63188924  | C | T | 0.31 | 0.07  | 0.01 | 1.84E-07 |
| AKT3    | rs4515770   | 1  | 243523611 | C | T | 0.22 | 0.06  | 0.01 | 1.52E-05 |
| AKT3    | rs7916868   | 10 | 63229171  | T | A | 0.50 | 0.05  | 0.01 | 1.23E-05 |
| ALCAM   | rs34926152  | 3  | 105545332 | T | G | 0.05 | -0.30 | 0.02 | 1.26E-35 |
| ALCAM   | rs9274626   | 6  | 32668263  | C | T | 0.68 | -0.06 | 0.01 | 3.78E-07 |
| ALCAM   | rs199922514 | 8  | 9325592   | G | A | 0.91 | -0.11 | 0.01 | 9.10E-10 |
| ALCAM   | rs9411365   | 9  | 133242881 | G | C | 0.07 | 0.10  | 0.01 | 3.81E-06 |
| ALCAM   | rs59822672  | 11 | 126401080 | C | G | 0.08 | -0.09 | 0.01 | 9.99E-06 |
| ALCAM   | rs11045826  | 12 | 21181665  | C | T | 0.16 | 0.09  | 0.01 | 9.32E-10 |
| ALCAM   | rs904628    | 12 | 120904281 | A | G | 0.48 | -0.06 | 0.01 | 5.56E-09 |
| ALCAM   | rs11075299  | 16 | 16152307  | G | T | 0.29 | 0.10  | 0.01 | 1.43E-16 |
| ALCAM   | rs186021206 | 17 | 7166093   | A | G | 0.01 | 0.84  | 0.05 | 5.87E-32 |
| ALCAM   | rs7224668   | 17 | 81261988  | C | T | 0.56 | -0.05 | 0.01 | 3.94E-06 |
| ALCAM   | rs2638282   | 19 | 48710576  | A | G | 0.53 | 0.06  | 0.01 | 5.53E-08 |
| ALCAM   | rs3747207   | 22 | 43928975  | A | G | 0.22 | 0.08  | 0.01 | 6.57E-10 |
| ALDH1A1 | rs7775698   | 6  | 135097497 | T | C | 0.26 | -0.09 | 0.01 | 8.80E-14 |
| ALDH1A1 | rs348452    | 9  | 72938469  | T | C | 0.27 | 0.09  | 0.01 | 7.52E-13 |
| ALDH1A1 | rs3747207   | 22 | 43928975  | A | G | 0.22 | 0.07  | 0.01 | 4.89E-08 |
| ALDH3A1 | rs887241    | 17 | 19742625  | C | A | 0.66 | 0.48  | 0.01 | 0.00E+00 |
| ALPP    | rs761164    | 1  | 39885979  | G | A | 0.15 | 0.07  | 0.01 | 4.21E-06 |
| ALPP    | rs12743084  | 1  | 155188692 | G | C | 0.54 | 0.06  | 0.01 | 1.78E-09 |
| ALPP    | rs12478529  | 2  | 232421944 | T | C | 0.23 | 0.50  | 0.01 | 0.00E+00 |
| ALPP    | rs71626052  | 3  | 138008603 | T | A | 0.47 | -0.05 | 0.01 | 2.49E-06 |
| ALPP    | rs2076295   | 6  | 7562999   | G | T | 0.45 | 0.04  | 0.01 | 2.39E-05 |
| ALPP    | rs55792059  | 6  | 53487408  | A | C | 0.19 | 0.08  | 0.01 | 2.25E-08 |
| ALPP    | rs117847945 | 6  | 79152613  | G | A | 0.02 | 0.17  | 0.02 | 4.10E-06 |
| ALPP    | rs4236709   | 8  | 32552592  | A | G | 0.78 | 0.05  | 0.01 | 2.07E-05 |
| ALPP    | rs3936578   | 9  | 106719746 | C | A | 0.49 | -0.08 | 0.01 | 5.34E-15 |
| ALPP    | rs782134971 | 9  | 133264504 | G | C | 0.25 | -0.24 | 0.01 | 3.11E-96 |
| ALPP    | rs7167092   | 15 | 31334670  | C | T | 0.35 | -0.05 | 0.01 | 7.65E-07 |
| ALPP    | rs186021206 | 17 | 7166093   | A | G | 0.01 | 0.46  | 0.05 | 1.12E-10 |
| ALPP    | rs516246    | 19 | 48702915  | T | C | 0.51 | -0.12 | 0.01 | 1.12E-30 |
| AMBN    | -           | 4  | 70513213  | T | A | 0.76 | 0.09  | 0.01 | 1.69E-10 |
| AMBP    | rs61747728  | 1  | 179557079 | T | C | 0.04 | 0.15  | 0.02 | 1.44E-07 |
| AMBP    | rs75166367  | 2  | 162107791 | A | G | 0.06 | -0.11 | 0.01 | 5.32E-06 |
| AMBP    | rs406658    | 6  | 32028747  | A | C | 0.11 | 0.15  | 0.01 | 5.47E-18 |
| AMBP    | rs10265221  | 7  | 151717243 | C | T | 0.29 | 0.05  | 0.01 | 6.23E-06 |

|        |             |    |           |   |   |      |       |      |           |
|--------|-------------|----|-----------|---|---|------|-------|------|-----------|
| AMBP   | rs147941577 | 9  | 114069709 | G | A | 0.00 | -1.68 | 0.07 | 5.10E-63  |
| AMBP   | rs1169294   | 12 | 120988791 | A | G | 0.31 | 0.06  | 0.01 | 2.75E-06  |
| AMBP   | rs28929474  | 14 | 94378610  | T | C | 0.02 | 0.18  | 0.02 | 5.36E-06  |
| AMBP   | rs34262842  | 16 | 20344489  | G | A | 0.17 | -0.06 | 0.01 | 1.39E-05  |
| AMBP   | rs704       | 17 | 28367840  | A | G | 0.47 | -0.11 | 0.01 | 3.15E-24  |
| AMIGO2 | -           | 1  | 43812246  | G | A | 0.29 | 0.06  | 0.01 | 3.54E-06  |
| AMIGO2 | rs1524668   | 2  | 9557243   | C | A | 0.67 | 0.06  | 0.01 | 2.40E-07  |
| AMIGO2 | rs1354034   | 3  | 56815721  | C | T | 0.60 | -0.14 | 0.01 | 4.91E-36  |
| AMIGO2 | rs10935473  | 3  | 98698056  | T | G | 0.44 | -0.18 | 0.01 | 4.21E-54  |
| AMIGO2 | rs9272413   | 6  | 32637210  | C | T | 0.24 | -0.07 | 0.01 | 2.96E-06  |
| AMIGO2 | rs385893    | 9  | 4763176   | C | T | 0.52 | 0.06  | 0.01 | 1.27E-07  |
| AMIGO2 | rs2519093   | 9  | 133266456 | T | C | 0.18 | -0.16 | 0.01 | 5.11E-30  |
| AMIGO2 | rs174564    | 11 | 61820833  | G | A | 0.35 | 0.06  | 0.01 | 2.33E-07  |
| AMIGO2 | rs4055121   | 11 | 126362442 | T | C | 0.13 | -0.12 | 0.01 | 4.00E-12  |
| AMIGO2 | rs215384    | 12 | 47366418  | G | C | 0.41 | 0.16  | 0.01 | 4.82E-42  |
| AMIGO2 | rs2242497   | 12 | 56598846  | G | C | 0.36 | -0.06 | 0.01 | 1.90E-06  |
| AMIGO2 | rs10774625  | 12 | 111472415 | G | A | 0.50 | -0.08 | 0.01 | 1.32E-12  |
| AMIGO2 | rs186021206 | 17 | 7166093   | A | G | 0.01 | 0.98  | 0.05 | 1.21E-36  |
| AMIGO2 | -           | 20 | 49483100  | C | T | 0.24 | -0.06 | 0.01 | 2.16E-05  |
| AMN    | rs629301    | 1  | 109275684 | T | G | 0.78 | -0.07 | 0.01 | 1.59E-07  |
| AMN    | rs7979473   | 12 | 120982457 | G | A | 0.62 | 0.05  | 0.01 | 1.21E-05  |
| AMN    | rs28929474  | 14 | 94378610  | T | C | 0.02 | 0.68  | 0.03 | 2.19E-62  |
| AMN    | rs2295829   | 14 | 102922666 | C | G | 0.39 | 0.77  | 0.01 | 0.00E+00  |
| AMN    | rs1801689   | 17 | 66214462  | C | A | 0.03 | 0.24  | 0.02 | 4.79E-14  |
| AMY2A  | rs78245241  | 1  | 103793104 | G | T | 0.04 | -0.96 | 0.02 | 4.17E-201 |
| AMY2A  | rs291091    | 1  | 206940334 | C | T | 0.45 | 0.05  | 0.01 | 2.63E-05  |
| AMY2A  | -           | 5  | 44135692  | C | T | 0.20 | 0.07  | 0.01 | 1.88E-06  |
| AMY2A  | rs55901622  | 6  | 126836293 | G | A | 0.27 | 0.05  | 0.01 | 1.12E-05  |
| AMY2A  | rs1561929   | 8  | 128555127 | T | C | 0.88 | 0.08  | 0.01 | 1.62E-05  |
| AMY2A  | rs550057    | 9  | 133271182 | T | C | 0.26 | -0.15 | 0.01 | 3.18E-34  |
| AMY2A  | rs11054116  | 12 | 10970738  | A | G | 0.24 | -0.07 | 0.01 | 1.95E-08  |
| AMY2A  | rs533406    | 16 | 88908452  | G | A | 0.38 | -0.07 | 0.01 | 4.00E-10  |
| AMY2A  | rs2638282   | 19 | 48710576  | A | G | 0.53 | 0.05  | 0.01 | 1.48E-06  |
| AMY2B  | rs12080068  | 1  | 103787201 | A | C | 0.09 | 0.65  | 0.01 | 3.38E-222 |
| AMY2B  | rs55901622  | 6  | 126836293 | G | A | 0.27 | 0.05  | 0.01 | 1.58E-05  |
| AMY2B  | rs1561929   | 8  | 128555127 | T | C | 0.88 | 0.08  | 0.01 | 6.81E-06  |
| AMY2B  | rs550057    | 9  | 133271182 | T | C | 0.25 | -0.15 | 0.01 | 4.06E-34  |
| AMY2B  | rs56278466  | 10 | 17833858  | G | T | 0.66 | 0.05  | 0.01 | 4.53E-06  |
| AMY2B  | rs28456     | 11 | 61822009  | G | A | 0.31 | 0.05  | 0.01 | 1.81E-05  |
| AMY2B  | rs11054116  | 12 | 10970738  | A | G | 0.24 | -0.07 | 0.01 | 4.35E-07  |
| AMY2B  | rs533406    | 16 | 88908452  | G | A | 0.38 | -0.08 | 0.01 | 2.17E-11  |
| AMY2B  | rs2638282   | 19 | 48710576  | A | G | 0.53 | 0.05  | 0.01 | 1.69E-06  |
| ANG    | rs61791757  | 3  | 136186483 | A | G | 0.23 | -0.06 | 0.01 | 4.46E-07  |
| ANG    | rs11047261  | 12 | 24104294  | G | A | 0.04 | 0.12  | 0.02 | 2.31E-06  |
| ANG    | rs8008227   | 14 | 20688145  | A | G | 0.12 | 0.66  | 0.01 | 0.00E+00  |
| ANG    | -           | 17 | 47612663  | C | T | 0.48 | -0.05 | 0.01 | 1.74E-05  |
| ANGPT1 | rs12041331  | 1  | 156899922 | A | G | 0.09 | -0.10 | 0.01 | 1.48E-06  |
| ANGPT1 | rs13412535  | 2  | 224010157 | A | G | 0.23 | -0.08 | 0.01 | 6.87E-09  |
| ANGPT1 | rs7618405   | 3  | 18209017  | A | C | 0.21 | -0.07 | 0.01 | 9.47E-07  |
| ANGPT1 | rs1354034   | 3  | 56815721  | C | T | 0.60 | -0.09 | 0.01 | 6.27E-14  |
| ANGPT1 | rs3792366   | 3  | 123121029 | A | G | 0.59 | -0.05 | 0.01 | 1.24E-05  |
| ANGPT1 | rs755492124 | 4  | 101856385 | T | G | 0.39 | -0.07 | 0.01 | 1.46E-10  |
| ANGPT1 | rs10058074  | 5  | 132350453 | A | G | 0.48 | -0.06 | 0.01 | 4.30E-08  |
| ANGPT1 | rs3128984   | 6  | 31456751  | G | A | 0.07 | -0.13 | 0.01 | 8.86E-09  |
| ANGPT1 | rs146842698 | 6  | 70618570  | A | T | 0.31 | -0.07 | 0.01 | 7.45E-08  |
| ANGPT1 | rs6961069   | 7  | 80589645  | T | C | 0.40 | 0.08  | 0.01 | 5.75E-11  |

|         |             |    |           |   |   |      |       |      |           |
|---------|-------------|----|-----------|---|---|------|-------|------|-----------|
| ANGPT1  | rs6993770   | 8  | 105569300 | T | A | 0.29 | -0.19 | 0.01 | 6.03E-55  |
| ANGPT1  | rs9410207   | 9  | 88789884  | C | T | 0.07 | -0.10 | 0.01 | 1.73E-05  |
| ANGPT1  | rs61751937  | 9  | 110549951 | C | G | 0.03 | 0.16  | 0.02 | 5.81E-06  |
| ANGPT1  | rs11251714  | 10 | 3097027   | G | A | 0.36 | -0.06 | 0.01 | 3.75E-06  |
| ANGPT1  | rs7896518   | 10 | 63344740  | G | A | 0.42 | 0.10  | 0.01 | 1.94E-17  |
| ANGPT1  | rs71474568  | 10 | 102589091 | G | T | 0.34 | 0.07  | 0.01 | 1.50E-09  |
| ANGPT1  | rs4759076   | 12 | 54336088  | C | T | 0.46 | 0.06  | 0.01 | 5.79E-08  |
| ANGPT1  | rs61978213  | 14 | 70187041  | A | G | 0.04 | 0.13  | 0.02 | 4.28E-06  |
| ANGPT1  | rs59001897  | 15 | 64868193  | A | T | 0.17 | 0.08  | 0.01 | 8.05E-08  |
| ANGPT1  | rs151234    | 16 | 28494339  | C | G | 0.13 | 0.08  | 0.01 | 1.12E-05  |
| ANGPT1  | rs12445050  | 16 | 81837364  | T | C | 0.14 | 0.12  | 0.01 | 1.00E-13  |
| ANGPT1  | rs1654425   | 19 | 55027612  | C | T | 0.83 | 0.19  | 0.01 | 4.36E-35  |
| ANGPT1  | rs3827978   | 20 | 19300647  | T | C | 0.35 | 0.08  | 0.01 | 5.01E-12  |
| ANGPT2  | rs13107325  | 4  | 102267552 | T | C | 0.08 | 0.13  | 0.01 | 5.02E-09  |
| ANGPT2  | rs1968586   | 8  | 6421990   | T | C | 0.36 | -0.16 | 0.01 | 1.35E-40  |
| ANGPT2  | rs4841132   | 8  | 9326086   | G | A | 0.91 | -0.11 | 0.01 | 1.21E-08  |
| ANGPT2  | -           | 9  | 133255468 | T | G | 0.06 | 0.22  | 0.02 | 3.06E-20  |
| ANGPT2  | rs34434834  | 11 | 126437901 | A | G | 0.03 | 0.24  | 0.02 | 2.00E-14  |
| ANGPT2  | rs2137537   | 12 | 70719307  | C | T | 0.55 | -0.05 | 0.01 | 1.44E-05  |
| ANGPT2  | rs186021206 | 17 | 7166093   | A | G | 0.01 | 0.86  | 0.05 | 1.74E-29  |
| ANGPTL1 | rs12753251  | 1  | 178560763 | A | G | 0.53 | -0.28 | 0.01 | 1.17E-138 |
| ANGPTL1 | -           | 6  | 32215801  | C | T | 0.17 | 0.07  | 0.01 | 8.58E-06  |
| ANGPTL1 | rs1137654   | 9  | 98808054  | T | A | 0.09 | -0.10 | 0.01 | 1.94E-06  |
| ANGPTL1 | rs28929474  | 14 | 94378610  | T | C | 0.02 | 0.19  | 0.02 | 1.64E-06  |
| ANGPTL1 | rs186021206 | 17 | 7166093   | A | G | 0.01 | 0.33  | 0.05 | 2.73E-05  |
| ANGPTL1 | rs149394327 | 17 | 66232877  | C | G | 0.03 | 0.25  | 0.02 | 3.05E-14  |
| ANGPTL1 | rs8103017   | 19 | 55487775  | G | C | 0.29 | 0.06  | 0.01 | 3.30E-06  |
| ANGPTL2 | rs2856674   | 6  | 32691868  | G | A | 0.15 | -0.09 | 0.01 | 5.31E-09  |
| ANGPTL2 | rs4141100   | 7  | 7237323   | A | G | 0.61 | 0.06  | 0.01 | 3.43E-08  |
| ANGPTL2 | rs2142306   | 8  | 133458388 | C | T | 0.41 | 0.05  | 0.01 | 9.25E-06  |
| ANGPTL2 | rs117360431 | 9  | 127053216 | A | G | 0.02 | 0.18  | 0.03 | 6.88E-06  |
| ANGPTL2 | rs138260315 | 11 | 12015556  | T | G | 0.18 | -0.12 | 0.01 | 3.15E-15  |
| ANGPTL2 | rs55799523  | 19 | 55488178  | A | C | 0.27 | 0.26  | 0.01 | 1.07E-90  |
| ANGPTL2 | rs181210490 | 20 | 3715330   | A | G | 0.01 | 0.58  | 0.03 | 5.29E-28  |
| ANGPTL3 | rs763015008 | 1  | 62508787  | T | C | 0.35 | -0.28 | 0.01 | 1.10E-151 |
| ANGPTL3 | rs3916027   | 8  | 19967357  | A | G | 0.26 | 0.08  | 0.01 | 9.05E-13  |
| ANGPTL3 | rs10808546  | 8  | 125483576 | T | C | 0.45 | 0.05  | 0.01 | 3.74E-07  |
| ANGPTL3 | rs964184    | 11 | 116778201 | C | G | 0.87 | -0.12 | 0.01 | 3.08E-15  |
| ANGPTL3 | rs28929474  | 14 | 94378610  | T | C | 0.02 | 0.24  | 0.02 | 5.39E-11  |
| ANGPTL3 | rs72786786  | 16 | 56951602  | A | G | 0.31 | 0.05  | 0.01 | 2.09E-05  |
| ANGPTL3 | rs1065853   | 19 | 44909976  | T | G | 0.08 | 0.13  | 0.01 | 4.70E-12  |
| ANGPTL4 | rs7252574   | 19 | 8376895   | T | C | 0.51 | 0.28  | 0.01 | 1.34E-132 |
| ANGPTL7 | rs28991009  | 1  | 11193627  | T | G | 0.01 | -2.16 | 0.04 | 1.03E-286 |
| ANGPTL7 | rs6764769   | 3  | 141381438 | G | A | 0.44 | -0.06 | 0.01 | 1.34E-07  |
| ANGPTL7 | rs7019896   | 9  | 33113198  | T | G | 0.93 | 0.11  | 0.01 | 1.24E-06  |
| ANGPTL7 | rs529700    | 10 | 17843438  | C | T | 0.51 | 0.07  | 0.01 | 2.95E-08  |
| ANGPTL7 | rs112771035 | 11 | 126355981 | G | C | 0.07 | -0.12 | 0.01 | 5.37E-09  |
| ANGPTL7 | rs186021206 | 17 | 7166093   | A | G | 0.01 | 0.76  | 0.05 | 6.96E-25  |
| ANGPTL7 | rs704       | 17 | 28367840  | A | G | 0.47 | 0.06  | 0.01 | 4.80E-08  |
| ANKRD54 | rs35496925  | 22 | 38028600  | G | A | 0.06 | 0.14  | 0.02 | 7.92E-09  |
| ANPEP   | rs13135092  | 4  | 102276925 | G | A | 0.08 | 0.09  | 0.01 | 4.42E-06  |
| ANPEP   | rs4835265   | 4  | 145900258 | A | C | 0.16 | 0.07  | 0.01 | 5.57E-06  |
| ANPEP   | rs4055121   | 11 | 126362442 | T | C | 0.13 | -0.10 | 0.01 | 5.47E-11  |
| ANPEP   | rs2297066   | 14 | 103100498 | G | C | 0.24 | 0.06  | 0.01 | 5.44E-06  |
| ANPEP   | rs1042499   | 15 | 89785074  | C | T | 0.06 | 0.81  | 0.02 | 5.07E-246 |
| ANPEP   | rs186021206 | 17 | 7166093   | A | G | 0.01 | 0.64  | 0.05 | 1.07E-18  |



|         |             |    |           |   |   |      |       |      |           |
|---------|-------------|----|-----------|---|---|------|-------|------|-----------|
| ANPEP   | rs12373325  | 18 | 58420416  | C | T | 0.80 | -0.06 | 0.01 | 2.27E-05  |
| ANXA10  | rs139558368 | 1  | 155225280 | A | T | 0.43 | 0.05  | 0.01 | 1.90E-05  |
| ANXA11  | rs9281986   | 6  | 32633960  | G | A | 0.17 | -0.10 | 0.01 | 2.66E-10  |
| ANXA11  | rs3847326   | 10 | 63572099  | G | A | 0.48 | -0.05 | 0.01 | 2.21E-05  |
| ANXA11  | rs2784773   | 10 | 80160044  | C | T | 0.64 | 0.07  | 0.01 | 2.96E-08  |
| ANXA3   | rs1354034   | 3  | 56815721  | C | T | 0.60 | 0.05  | 0.01 | 2.83E-05  |
| ANXA3   | rs146728751 | 4  | 78579081  | A | G | 0.00 | -1.18 | 0.09 | 5.36E-17  |
| ANXA3   | rs6993770   | 8  | 105569300 | T | A | 0.29 | -0.07 | 0.01 | 2.26E-07  |
| ANXA3   | rs7896518   | 10 | 63344740  | G | A | 0.42 | 0.06  | 0.01 | 2.79E-07  |
| ANXA3   | rs10418046  | 19 | 53824615  | G | T | 0.21 | 0.07  | 0.01 | 3.77E-06  |
| ANXA4   | rs1354034   | 3  | 56815721  | C | T | 0.60 | 0.05  | 0.01 | 1.15E-05  |
| ANXA4   | rs7896518   | 10 | 63344740  | G | A | 0.42 | 0.07  | 0.01 | 4.76E-09  |
| ANXA4   | rs200309755 | 17 | 29518756  | T | C | 0.54 | 0.05  | 0.01 | 2.83E-05  |
| ANXA5   | rs2306411   | 4  | 121677480 | G | A | 0.29 | -0.12 | 0.01 | 1.04E-20  |
| AOC1    | rs1049742   | 7  | 150857465 | T | C | 0.08 | 0.49  | 0.01 | 5.35E-121 |
| AOC3    | rs2270894   | 3  | 9933702   | G | C | 0.20 | 0.08  | 0.01 | 1.19E-09  |
| AOC3    | rs13135092  | 4  | 102276925 | G | A | 0.08 | 0.09  | 0.01 | 1.58E-06  |
| AOC3    | rs75901433  | 6  | 32531373  | G | A | 0.56 | 0.06  | 0.01 | 9.83E-08  |
| AOC3    | rs767298    | 7  | 7234953   | T | G | 0.63 | -0.07 | 0.01 | 8.43E-10  |
| AOC3    | rs9411365   | 9  | 133242881 | G | C | 0.07 | 0.10  | 0.01 | 1.19E-06  |
| AOC3    | rs56278466  | 10 | 17833858  | G | T | 0.66 | 0.07  | 0.01 | 7.39E-11  |
| AOC3    | rs3967200   | 11 | 126362490 | T | C | 0.13 | -0.10 | 0.01 | 6.72E-12  |
| AOC3    | rs1042704   | 14 | 22843385  | A | G | 0.22 | -0.09 | 0.01 | 6.67E-14  |
| AOC3    | rs12913657  | 15 | 50708771  | C | T | 0.15 | 0.08  | 0.01 | 1.65E-07  |
| AOC3    | rs186021206 | 17 | 7166093   | A | G | 0.01 | 0.59  | 0.05 | 9.05E-15  |
| AOC3    | rs33986943  | 17 | 42852620  | A | G | 0.11 | -0.85 | 0.01 | 0.00E+00  |
| APBB1IP | rs3129754   | 6  | 32615269  | G | A | 0.42 | 0.05  | 0.01 | 1.74E-05  |
| APBB1IP | rs7461753   | 8  | 143907330 | C | A | 0.42 | 0.06  | 0.01 | 4.77E-07  |
| APBB1IP | rs2992335   | 10 | 26439005  | G | C | 0.60 | -0.22 | 0.01 | 2.09E-82  |
| APBB1IP | rs11671654  | 19 | 11903540  | G | C | 0.49 | 0.15  | 0.01 | 8.26E-41  |
| APBB1IP | rs10418046  | 19 | 53824615  | G | T | 0.21 | 0.11  | 0.01 | 1.91E-15  |
| APEX1   | rs1354034   | 3  | 56815721  | C | T | 0.60 | 0.06  | 0.01 | 3.92E-08  |
| APEX1   | rs111338191 | 12 | 111388673 | T | A | 0.52 | -0.05 | 0.01 | 5.45E-06  |
| APEX1   | rs1130409   | 14 | 20456995  | G | T | 0.48 | -0.39 | 0.01 | 5.86E-276 |
| APEX1   | rs4632248   | 19 | 53821741  | T | G | 0.21 | 0.07  | 0.01 | 7.66E-07  |
| APLP1   | rs13412535  | 2  | 224010157 | A | G | 0.23 | 0.07  | 0.01 | 4.14E-08  |
| APLP1   | rs4602861   | 8  | 105578478 | G | A | 0.27 | 0.10  | 0.01 | 1.10E-13  |
| APLP1   | rs2229498   | 10 | 69097096  | A | G | 0.84 | -0.11 | 0.01 | 2.01E-12  |
| APLP1   | rs12609736  | 19 | 55033916  | G | A | 0.83 | -0.11 | 0.01 | 4.91E-12  |
| APLP1   | rs6081568   | 20 | 19318144  | G | C | 0.35 | -0.06 | 0.01 | 6.28E-07  |
| APOH    | rs1801689   | 17 | 66214462  | C | A | 0.03 | -1.44 | 0.02 | 0.00E+00  |
| APOM    | rs1260326   | 2  | 27508073  | C | T | 0.61 | -0.09 | 0.01 | 2.29E-15  |
| APOM    | rs805258    | 6  | 31665775  | T | C | 0.03 | -0.77 | 0.02 | 2.77E-124 |
| APOM    | rs115849089 | 8  | 20054859  | A | G | 0.12 | 0.09  | 0.01 | 6.47E-07  |
| APOM    | rs56332871  | 15 | 96171587  | A | C | 0.27 | 0.06  | 0.01 | 1.10E-05  |
| APOM    | rs247616    | 16 | 56955678  | T | C | 0.33 | 0.13  | 0.01 | 4.05E-27  |
| APOM    | rs112001035 | 17 | 68827664  | A | G | 0.06 | 0.13  | 0.02 | 8.29E-08  |
| APOM    | rs4121823   | 18 | 49617853  | A | T | 0.84 | 0.07  | 0.01 | 2.35E-05  |
| APOM    | rs1800961   | 20 | 44413724  | T | C | 0.03 | -0.24 | 0.02 | 7.68E-15  |
| APOM    | rs3747207   | 22 | 43928975  | A | G | 0.22 | -0.06 | 0.01 | 1.21E-05  |
| APP     | rs12086222  | 1  | 156899838 | C | G | 0.11 | 0.08  | 0.01 | 6.95E-06  |
| APP     | rs13412535  | 2  | 224010157 | A | G | 0.23 | -0.06 | 0.01 | 4.18E-06  |
| APP     | rs7618405   | 3  | 18209017  | A | C | 0.20 | -0.06 | 0.01 | 2.67E-05  |
| APP     | rs1354034   | 3  | 56815721  | C | T | 0.60 | -0.10 | 0.01 | 4.42E-18  |
| APP     | rs755492124 | 4  | 101856385 | T | G | 0.39 | -0.07 | 0.01 | 1.26E-09  |
| APP     | rs274555    | 5  | 132387259 | T | C | 0.40 | 0.06  | 0.01 | 8.35E-08  |

|          |             |    |           |   |   |      |       |      |           |
|----------|-------------|----|-----------|---|---|------|-------|------|-----------|
| APP      | rs138614581 | 6  | 31436393  | T | A | 0.08 | -0.12 | 0.01 | 5.99E-08  |
| APP      | rs1917342   | 6  | 70640051  | G | A | 0.30 | -0.06 | 0.01 | 3.59E-06  |
| APP      | rs6961069   | 7  | 80589645  | T | C | 0.40 | 0.07  | 0.01 | 3.10E-09  |
| APP      | rs6993770   | 8  | 105569300 | T | A | 0.29 | -0.08 | 0.01 | 1.86E-11  |
| APP      | rs10820606  | 9  | 96430637  | C | A | 0.23 | -0.07 | 0.01 | 1.44E-07  |
| APP      | rs7896518   | 10 | 63344740  | G | A | 0.42 | 0.10  | 0.01 | 1.81E-19  |
| APP      | rs2229498   | 10 | 69097096  | A | G | 0.84 | 0.11  | 0.01 | 1.36E-13  |
| APP      | rs35277580  | 12 | 6185368   | A | G | 0.49 | -0.05 | 0.01 | 8.04E-06  |
| APP      | rs61978213  | 14 | 70187041  | A | G | 0.04 | 0.13  | 0.02 | 1.66E-05  |
| APP      | rs59001897  | 15 | 64868193  | A | T | 0.17 | 0.08  | 0.01 | 7.84E-07  |
| APP      | rs12445050  | 16 | 81837364  | T | C | 0.14 | 0.11  | 0.01 | 8.54E-12  |
| APP      | rs1654425   | 19 | 55027612  | C | T | 0.83 | 0.17  | 0.01 | 1.15E-28  |
| APP      | rs6081565   | 20 | 19307260  | A | G | 0.35 | 0.08  | 0.01 | 1.25E-10  |
| APP      | rs8131895   | 21 | 26131210  | A | C | 0.65 | -0.07 | 0.01 | 2.69E-09  |
| APRT     | -           | 2  | 190454999 | T | A | 0.52 | 0.05  | 0.01 | 5.49E-06  |
| APRT     | rs1354034   | 3  | 56815721  | C | T | 0.60 | 0.10  | 0.01 | 2.20E-17  |
| APRT     | rs854572    | 7  | 95325384  | G | C | 0.53 | 0.05  | 0.01 | 3.67E-06  |
| APRT     | rs11397106  | 10 | 63572305  | T | C | 0.47 | -0.05 | 0.01 | 2.79E-05  |
| APRT     | rs10876550  | 12 | 54318524  | A | G | 0.56 | 0.06  | 0.01 | 7.06E-08  |
| APRT     | rs74403919  | 14 | 91777634  | A | T | 0.17 | 0.07  | 0.01 | 1.94E-05  |
| APRT     | rs111433410 | 16 | 88802787  | T | C | 0.01 | -0.37 | 0.04 | 4.06E-10  |
| APRT     | rs704       | 17 | 28367840  | A | G | 0.47 | -0.08 | 0.01 | 2.29E-13  |
| AREG     | rs1691273   | 4  | 74457928  | T | C | 0.69 | -0.18 | 0.01 | 3.40E-46  |
| AREG     | rs712831    | 7  | 55175089  | C | T | 0.79 | 0.07  | 0.01 | 8.24E-07  |
| AREG     | -           | 9  | 133263362 | G | A | 0.18 | -0.09 | 0.01 | 2.49E-09  |
| AREG     | rs492602    | 19 | 48703160  | G | A | 0.51 | -0.07 | 0.01 | 1.59E-09  |
| ARG1     | rs2781668   | 6  | 131576138 | T | C | 0.17 | -0.24 | 0.01 | 6.34E-58  |
| ARG1     | rs592423    | 6  | 139519556 | C | A | 0.55 | 0.09  | 0.01 | 6.45E-17  |
| ARG1     | rs6592965   | 7  | 50360284  | A | G | 0.45 | 0.06  | 0.01 | 1.96E-07  |
| ARG1     | rs56074687  | 11 | 16589928  | C | T | 0.29 | 0.05  | 0.01 | 1.96E-05  |
| ARG1     | rs62108438  | 19 | 12889433  | C | T | 0.39 | 0.10  | 0.01 | 1.85E-17  |
| ARHGAP1  | rs6993770   | 8  | 105569300 | T | A | 0.29 | -0.09 | 0.01 | 1.13E-12  |
| ARHGAP1  | rs12245149  | 10 | 63561387  | A | C | 0.49 | -0.06 | 0.01 | 1.17E-07  |
| ARHGAP1  | -           | 16 | 72045090  | T | G | 0.18 | 0.15  | 0.01 | 8.21E-24  |
| ARHGAP25 | rs13413887  | 2  | 68769536  | G | A | 0.76 | 0.11  | 0.01 | 5.20E-15  |
| ARHGAP25 | rs6993770   | 8  | 105569300 | T | A | 0.29 | -0.07 | 0.01 | 4.23E-07  |
| ARSA     | rs114165349 | 1  | 26695422  | C | G | 0.02 | 0.17  | 0.02 | 2.32E-07  |
| ARSA     | rs687339    | 3  | 136213517 | T | C | 0.77 | 0.06  | 0.01 | 1.03E-07  |
| ARSA     | -           | 6  | 130065067 | G | A | 0.68 | 0.05  | 0.01 | 1.72E-06  |
| ARSA     | rs10745925  | 12 | 101825121 | C | T | 0.29 | -0.26 | 0.01 | 1.52E-127 |
| ARSA     | rs145078947 | 14 | 93186629  | T | G | 0.00 | 0.63  | 0.06 | 9.05E-11  |
| ARSA     | rs58542926  | 19 | 19268740  | T | C | 0.08 | 0.18  | 0.01 | 3.64E-22  |
| ARSA     | rs429358    | 19 | 44908684  | C | T | 0.16 | -0.06 | 0.01 | 7.57E-06  |
| ARSA     | rs873697    | 22 | 50625741  | A | G | 0.05 | 1.49  | 0.02 | 0.00E+00  |
| ARSB     | rs1065757   | 5  | 78885654  | T | C | 0.44 | -0.30 | 0.01 | 3.00E-148 |
| ARSB     | rs17622656  | 5  | 132485305 | A | G | 0.39 | -0.06 | 0.01 | 2.26E-06  |
| ARSB     | rs1293303   | 8  | 11862718  | C | G | 0.44 | 0.07  | 0.01 | 5.95E-11  |
| ARSB     | rs6993770   | 8  | 105569300 | T | A | 0.29 | -0.08 | 0.01 | 1.08E-11  |
| ARSB     | rs10968020  | 9  | 27628442  | C | T | 0.26 | -0.06 | 0.01 | 1.27E-06  |
| ARSB     | rs7896518   | 10 | 63344740  | G | A | 0.42 | 0.08  | 0.01 | 2.02E-13  |
| ARSB     | rs202046353 | 12 | 8966818   | T | A | 0.09 | 0.09  | 0.01 | 8.48E-06  |
| ARSB     | rs10778152  | 12 | 101831973 | G | A | 0.29 | -0.09 | 0.01 | 2.10E-12  |
| ARSB     | rs145078947 | 14 | 93186629  | T | G | 0.00 | 0.59  | 0.07 | 6.82E-08  |
| ARSB     | rs8072896   | 17 | 57005471  | G | T | 0.48 | -0.05 | 0.01 | 1.05E-05  |
| ARSB     | rs892090    | 19 | 55027704  | G | T | 0.83 | 0.10  | 0.01 | 1.32E-11  |
| ART3     | rs150816167 | 1  | 179602727 | C | T | 0.04 | 0.15  | 0.02 | 1.91E-08  |

|         |             |    |           |   |   |      |       |      |           |
|---------|-------------|----|-----------|---|---|------|-------|------|-----------|
| ART3    | rs1868164   | 3  | 134650578 | A | G | 0.63 | -0.06 | 0.01 | 1.18E-08  |
| ART3    | -           | 4  | 76109245  | C | T | 0.43 | 0.27  | 0.01 | 4.94E-143 |
| ART3    | rs11649031  | 16 | 377516    | C | T | 0.59 | -0.06 | 0.01 | 1.51E-07  |
| ART3    | rs36060036  | 16 | 20350628  | T | C | 0.17 | -0.08 | 0.01 | 1.76E-09  |
| ARTN    | rs112597211 | 14 | 105903575 | C | T | 0.14 | 0.09  | 0.01 | 1.03E-07  |
| ASAH2   | rs12032634  | 1  | 25681077  | A | T | 0.52 | -0.08 | 0.01 | 1.20E-16  |
| ASAH2   | rs3732356   | 3  | 119810266 | T | G | 0.94 | -0.11 | 0.01 | 7.88E-08  |
| ASAH2   | rs531060104 | 4  | 99128003  | T | C | 0.23 | -0.06 | 0.01 | 7.00E-06  |
| ASAH2   | rs890793    | 5  | 154194378 | T | C | 0.38 | -0.05 | 0.01 | 5.15E-06  |
| ASAH2   | rs12206570  | 6  | 130063959 | G | T | 0.58 | 0.04  | 0.01 | 2.01E-05  |
| ASAH2   | rs804269    | 8  | 11771610  | C | T | 0.69 | -0.05 | 0.01 | 8.37E-07  |
| ASAH2   | rs12056768  | 8  | 115976302 | G | T | 0.58 | 0.06  | 0.01 | 1.13E-09  |
| ASAH2   | rs56278466  | 10 | 17833858  | G | T | 0.66 | 0.07  | 0.01 | 2.62E-09  |
| ASAH2   | rs1877558   | 10 | 50232820  | T | C | 0.24 | -0.69 | 0.01 | 0.00E+00  |
| ASAH2   | rs2351958   | 11 | 16226474  | A | C | 0.39 | 0.05  | 0.01 | 9.13E-07  |
| ASAH2   | rs35764600  | 12 | 11638694  | C | G | 0.40 | -0.08 | 0.01 | 1.87E-15  |
| ASAH2   | -           | 12 | 21191379  | G | A | 0.24 | 0.07  | 0.01 | 6.20E-10  |
| ASAH2   | rs7979473   | 12 | 120982457 | G | A | 0.62 | -0.05 | 0.01 | 2.74E-07  |
| ASAH2   | rs28929474  | 14 | 94378610  | T | C | 0.02 | 0.16  | 0.02 | 7.50E-06  |
| ASAH2   | rs139974673 | 15 | 43735687  | C | T | 0.02 | 0.16  | 0.02 | 1.91E-06  |
| ASAH2   | rs12440841  | 15 | 50713624  | T | C | 0.34 | -0.09 | 0.01 | 7.60E-19  |
| ASAH2   | rs2611867   | 17 | 47587495  | G | A | 0.51 | -0.07 | 0.01 | 1.51E-12  |
| ASAH2   | rs77542162  | 17 | 69085137  | G | A | 0.02 | 0.28  | 0.02 | 3.22E-17  |
| ASGR1   | rs12740374  | 1  | 109274968 | T | G | 0.22 | 0.13  | 0.01 | 6.34E-22  |
| ASGR1   | rs11405616  | 5  | 142130696 | A | C | 0.61 | 0.05  | 0.01 | 1.98E-05  |
| ASGR1   | rs7012814   | 8  | 9315848   | A | G | 0.47 | -0.05 | 0.01 | 4.11E-06  |
| ASGR1   | rs2622935   | 11 | 117140042 | G | A | 0.81 | -0.14 | 0.01 | 1.87E-23  |
| ASGR1   | rs28929474  | 14 | 94378610  | T | C | 0.02 | 0.32  | 0.03 | 6.01E-16  |
| ASGR1   | rs55714927  | 17 | 7176997   | T | C | 0.20 | -0.19 | 0.01 | 7.24E-43  |
| ASGR1   | rs1801689   | 17 | 66214462  | C | A | 0.03 | 0.20  | 0.02 | 5.25E-09  |
| ATF2    | rs58534292  | 14 | 21737747  | C | T | 0.65 | -0.07 | 0.01 | 2.10E-08  |
| ATF2    | rs2857339   | 14 | 105916828 | T | C | 0.50 | 0.14  | 0.01 | 1.34E-23  |
| ATG4A   | rs1354034   | 3  | 56815721  | C | T | 0.60 | 0.05  | 0.01 | 5.42E-06  |
| ATG4A   | rs749679    | 16 | 88504408  | G | A | 0.30 | 0.06  | 0.01 | 8.54E-07  |
| ATG4A   | rs8887      | 19 | 4502189   | C | T | 0.57 | 0.06  | 0.01 | 1.03E-07  |
| ATOX1   | rs1354034   | 3  | 56815721  | C | T | 0.60 | 0.06  | 0.01 | 1.96E-07  |
| ATOX1   | rs17622656  | 5  | 132485305 | A | G | 0.39 | -0.05 | 0.01 | 1.55E-05  |
| ATOX1   | rs371549947 | 5  | 151751699 | T | C | 0.00 | -1.47 | 0.14 | 6.16E-12  |
| ATOX1   | rs139130389 | 11 | 72139110  | A | C | 0.07 | -0.12 | 0.01 | 2.91E-08  |
| ATOX1   | rs58534292  | 14 | 21737747  | C | T | 0.65 | -0.11 | 0.01 | 3.40E-20  |
| ATOX1   | rs73365420  | 14 | 106015481 | A | C | 0.62 | -0.12 | 0.01 | 8.38E-23  |
| ATOX1   | rs200309755 | 17 | 29518756  | T | C | 0.54 | 0.05  | 0.01 | 1.65E-05  |
| ATOX1   | rs1613662   | 19 | 55025227  | A | G | 0.83 | 0.08  | 0.01 | 3.97E-07  |
| ATP5IF1 | rs510379    | 1  | 28208722  | C | T | 0.36 | 0.11  | 0.01 | 3.52E-20  |
| ATP5IF1 | rs1354034   | 3  | 56815721  | C | T | 0.60 | 0.06  | 0.01 | 3.02E-07  |
| ATP5IF1 | rs17622656  | 5  | 132485305 | A | G | 0.39 | -0.05 | 0.01 | 2.38E-05  |
| ATP5IF1 | rs342298    | 7  | 106733200 | T | C | 0.45 | -0.05 | 0.01 | 2.60E-05  |
| ATP5IF1 | rs10733789  | 10 | 63188924  | C | T | 0.31 | 0.06  | 0.01 | 6.34E-06  |
| ATP5IF1 | rs10849412  | 12 | 6176680   | G | A | 0.43 | -0.05 | 0.01 | 1.71E-05  |
| ATP6AP2 | rs76415507  | 6  | 32524812  | G | T | 0.56 | -0.06 | 0.01 | 4.92E-06  |
| ATP6V1D | rs189049184 | 6  | 32519697  | A | G | 0.82 | -0.09 | 0.01 | 3.51E-08  |
| ATP6V1F | rs1354034   | 3  | 56815721  | C | T | 0.60 | 0.06  | 0.01 | 5.75E-08  |
| ATXN10  | rs1354034   | 3  | 56815721  | C | T | 0.60 | 0.08  | 0.01 | 8.21E-11  |
| ATXN10  | rs342293    | 7  | 106731773 | G | C | 0.46 | -0.05 | 0.01 | 6.32E-06  |
| ATXN10  | rs6993770   | 8  | 105569300 | T | A | 0.29 | -0.06 | 0.01 | 1.19E-06  |
| ATXN10  | rs7080386   | 10 | 63288546  | A | C | 0.41 | 0.05  | 0.01 | 7.56E-06  |

|         |             |    |           |   |   |      |       |      |           |
|---------|-------------|----|-----------|---|---|------|-------|------|-----------|
| ATXN10  | rs138166    | 22 | 45735358  | A | G | 0.30 | 0.11  | 0.01 | 2.75E-17  |
| AXIN1   | rs1354034   | 3  | 56815721  | C | T | 0.60 | 0.06  | 0.01 | 9.65E-07  |
| AXIN1   | rs6993770   | 8  | 105569300 | T | A | 0.29 | -0.06 | 0.01 | 4.58E-07  |
| AXIN1   | rs11647223  | 16 | 311321    | T | C | 0.47 | 0.05  | 0.01 | 1.89E-05  |
| AXL     | rs79412885  | 1  | 9181780   | A | G | 0.07 | -0.16 | 0.01 | 4.50E-14  |
| AXL     | rs7639097   | 3  | 99058485  | T | G | 0.61 | -0.06 | 0.01 | 1.20E-06  |
| AXL     | rs28393315  | 6  | 32635400  | G | A | 0.26 | 0.06  | 0.01 | 1.60E-05  |
| AXL     | rs950802    | 11 | 60385111  | A | G | 0.31 | 0.05  | 0.01 | 1.22E-05  |
| AXL     | rs35350651  | 12 | 111469627 | C | A | 0.50 | -0.05 | 0.01 | 2.68E-06  |
| AXL     | rs7140110   | 13 | 113841051 | C | T | 0.30 | 0.13  | 0.01 | 6.52E-25  |
| AXL     | rs186021206 | 17 | 7166093   | A | G | 0.01 | 0.98  | 0.05 | 2.56E-38  |
| AXL     | rs7224668   | 17 | 81261988  | C | T | 0.56 | -0.05 | 0.01 | 1.18E-05  |
| AXL     | rs66841352  | 19 | 41233275  | C | G | 0.40 | -0.17 | 0.01 | 9.54E-53  |
| AZU1    | rs2210918   | 1  | 157723195 | C | T | 0.47 | 0.05  | 0.01 | 7.84E-06  |
| AZU1    | rs2951842   | 8  | 6968999   | G | C | 0.50 | -0.06 | 0.01 | 1.48E-07  |
| AZU1    | rs57993781  | 8  | 143547232 | A | T | 0.48 | -0.06 | 0.01 | 1.22E-07  |
| AZU1    | -           | 19 | 831815    | G | T | 0.01 | -1.15 | 0.04 | 5.47E-101 |
| B4GALT1 | rs61747728  | 1  | 179557079 | T | C | 0.04 | 0.16  | 0.02 | 2.68E-08  |
| B4GALT1 | rs17138646  | 5  | 116010548 | G | T | 0.12 | 0.10  | 0.01 | 2.04E-09  |
| B4GALT1 | rs617578    | 6  | 32606826  | A | G | 0.10 | -0.10 | 0.01 | 1.90E-07  |
| B4GALT1 | rs7019909   | 9  | 33113324  | T | C | 0.10 | 0.33  | 0.01 | 1.97E-73  |
| B4GALT1 | rs550057    | 9  | 133271182 | T | C | 0.26 | 0.10  | 0.01 | 7.99E-14  |
| B4GALT1 | rs77924615  | 16 | 20381010  | A | G | 0.20 | -0.06 | 0.01 | 1.52E-05  |
| B4GALT1 | rs7247412   | 19 | 51810615  | C | T | 0.27 | -0.32 | 0.01 | 3.74E-146 |
| B4GAT1  | rs10168551  | 2  | 167741476 | C | T | 0.20 | -0.06 | 0.01 | 1.26E-05  |
| B4GAT1  | rs11130630  | 3  | 58375073  | G | A | 0.37 | 0.05  | 0.01 | 3.25E-06  |
| B4GAT1  | rs9274678   | 6  | 32668869  | G | A | 0.15 | -0.09 | 0.01 | 1.11E-09  |
| B4GAT1  | rs10217770  | 9  | 33146395  | A | C | 0.42 | -0.08 | 0.01 | 4.29E-12  |
| B4GAT1  | rs56278466  | 10 | 17833858  | G | T | 0.66 | 0.10  | 0.01 | 4.78E-18  |
| B4GAT1  | rs10896113  | 11 | 66349640  | T | C | 0.22 | -0.32 | 0.01 | 6.30E-131 |
| B4GAT1  | rs74611001  | 11 | 94487353  | A | C | 0.02 | -0.20 | 0.02 | 9.19E-08  |
| B4GAT1  | rs28873836  | 19 | 51811402  | C | G | 0.27 | -0.20 | 0.01 | 3.87E-58  |
| B4GAT1  | rs12975366  | 19 | 54255498  | C | T | 0.40 | -0.05 | 0.01 | 3.95E-06  |
| BACH1   | rs342293    | 7  | 106731773 | G | C | 0.46 | -0.05 | 0.01 | 2.52E-05  |
| BACH1   | rs6993770   | 8  | 105569300 | T | A | 0.29 | -0.06 | 0.01 | 7.09E-07  |
| BACH1   | rs4759076   | 12 | 54336088  | C | T | 0.46 | 0.05  | 0.01 | 8.86E-06  |
| BAG3    | rs710446    | 3  | 186742138 | C | T | 0.41 | -0.07 | 0.01 | 1.77E-08  |
| BAG3    | rs66530140  | 4  | 186240057 | C | T | 0.51 | -0.09 | 0.01 | 4.22E-15  |
| BAG3    | rs2545801   | 5  | 177414338 | C | T | 0.74 | -0.07 | 0.01 | 2.32E-07  |
| BAG3    | rs35434411  | 10 | 119669882 | A | G | 0.03 | 0.17  | 0.02 | 1.86E-07  |
| BAG3    | rs55714647  | 19 | 35055403  | A | G | 0.93 | -0.10 | 0.02 | 1.53E-05  |
| BAG6    | -           | 10 | 63156270  | A | T | 0.49 | 0.06  | 0.01 | 2.07E-06  |
| BAIAP2  | rs4835265   | 4  | 145900258 | A | C | 0.16 | 0.07  | 0.01 | 1.47E-05  |
| BAIAP2  | rs174560    | 11 | 61814292  | C | T | 0.31 | 0.06  | 0.01 | 1.39E-05  |
| BAIAP2  | rs3741513   | 12 | 124372114 | A | T | 0.61 | 0.08  | 0.01 | 1.08E-10  |
| BAIAP2  | rs550999044 | 14 | 103101069 | T | A | 0.24 | 0.08  | 0.01 | 1.01E-08  |
| BAIAP2  | rs9989483   | 17 | 80997736  | T | C | 0.17 | 0.10  | 0.01 | 5.69E-10  |
| BAIAP2  | rs12373325  | 18 | 58420416  | C | T | 0.80 | -0.06 | 0.01 | 2.41E-05  |
| BAIAP2  | rs189448562 | 20 | 3724468   | C | G | 0.01 | 0.40  | 0.04 | 6.74E-13  |
| BAMBI   | rs1354034   | 3  | 56815721  | C | T | 0.60 | -0.07 | 0.01 | 2.54E-08  |
| BANK1   | rs1354034   | 3  | 56815721  | C | T | 0.60 | 0.07  | 0.01 | 2.93E-10  |
| BANK1   | rs3113676   | 4  | 102043886 | C | T | 0.98 | 0.48  | 0.03 | 3.20E-25  |
| BANK1   | rs342293    | 7  | 106731773 | G | C | 0.46 | -0.06 | 0.01 | 8.95E-07  |
| BAX     | rs1354034   | 3  | 56815721  | C | T | 0.60 | 0.06  | 0.01 | 2.75E-07  |
| BAX     | rs3847326   | 10 | 63572099  | G | A | 0.48 | -0.05 | 0.01 | 1.66E-05  |
| BCAM    | rs539657009 | 1  | 161658666 | T | C | 0.13 | 0.08  | 0.01 | 5.02E-06  |

|         |             |    |           |   |   |      |       |      |           |
|---------|-------------|----|-----------|---|---|------|-------|------|-----------|
| BCAM    | rs1260326   | 2  | 27508073  | C | T | 0.61 | 0.05  | 0.01 | 7.11E-06  |
| BCAM    | rs10514710  | 3  | 44842479  | A | G | 0.20 | -0.06 | 0.01 | 1.81E-05  |
| BCAM    | rs139153665 | 3  | 58376860  | C | T | 0.37 | 0.07  | 0.01 | 1.98E-09  |
| BCAM    | -           | 4  | 144140928 | A | G | 0.45 | 0.12  | 0.01 | 4.65E-29  |
| BCAM    | rs73080552  | 5  | 39435331  | A | G | 0.11 | -0.08 | 0.01 | 1.22E-06  |
| BCAM    | rs12522289  | 5  | 178213863 | G | A | 0.08 | -0.09 | 0.01 | 1.08E-05  |
| BCAM    | rs9271325   | 6  | 32614736  | G | C | 0.47 | -0.06 | 0.01 | 3.41E-09  |
| BCAM    | rs778641135 | 6  | 135097494 | T | C | 0.26 | -0.06 | 0.01 | 1.06E-06  |
| BCAM    | rs6592965   | 7  | 50360284  | A | G | 0.45 | -0.08 | 0.01 | 2.81E-14  |
| BCAM    | rs8176672   | 9  | 133266772 | T | C | 0.06 | 0.66  | 0.01 | 3.02E-186 |
| BCAM    | rs56278466  | 10 | 17833858  | G | T | 0.66 | 0.16  | 0.01 | 1.23E-46  |
| BCAM    | -           | 12 | 54339944  | T | C | 0.10 | 0.10  | 0.01 | 1.50E-07  |
| BCAM    | rs2137537   | 12 | 70719307  | C | T | 0.55 | -0.05 | 0.01 | 2.16E-05  |
| BCAM    | rs200489612 | 17 | 7203059   | A | G | 0.01 | 0.41  | 0.05 | 3.77E-07  |
| BCAM    | rs1799918   | 19 | 12891586  | C | G | 0.38 | 0.11  | 0.01 | 4.41E-24  |
| BCAM    | rs28399654  | 19 | 44813331  | A | G | 0.03 | -0.65 | 0.02 | 2.34E-104 |
| BCAM    | rs2638282   | 19 | 48710576  | A | G | 0.53 | 0.05  | 0.01 | 1.03E-05  |
| BCAM    | rs2410405   | 21 | 41208436  | T | C | 0.38 | 0.11  | 0.01 | 3.03E-23  |
| BCAN    | rs1877465   | 1  | 117301629 | G | A | 0.19 | -0.06 | 0.01 | 1.82E-05  |
| BCAN    | rs2365715   | 1  | 156645322 | G | A | 0.39 | -0.23 | 0.01 | 1.16E-87  |
| BCAN    | rs13086758  | 3  | 24380618  | A | T | 0.21 | -0.07 | 0.01 | 1.15E-06  |
| BCAN    | rs2071592   | 6  | 31547563  | A | T | 0.35 | -0.06 | 0.01 | 4.41E-07  |
| BCAN    | rs73086586  | 7  | 20355325  | T | C | 0.06 | 0.16  | 0.01 | 8.07E-12  |
| BCAN    | rs66530708  | 7  | 73611279  | A | G | 0.07 | -0.13 | 0.01 | 1.21E-09  |
| BCAN    | rs56278466  | 10 | 17833858  | G | T | 0.66 | 0.12  | 0.01 | 2.88E-27  |
| BCL2L11 | rs13412535  | 2  | 224010157 | A | G | 0.23 | -0.06 | 0.01 | 4.11E-06  |
| BCL2L11 | rs1354034   | 3  | 56815721  | C | T | 0.60 | -0.05 | 0.01 | 3.05E-06  |
| BCL2L11 | rs5030062   | 3  | 186736391 | C | A | 0.37 | -0.15 | 0.01 | 1.38E-40  |
| BCL2L11 | rs66530140  | 4  | 186240057 | C | T | 0.51 | -0.29 | 0.01 | 5.37E-146 |
| BCL2L11 | rs1801020   | 5  | 177409531 | G | A | 0.74 | -0.15 | 0.01 | 9.35E-33  |
| BCL2L11 | rs6961069   | 7  | 80589645  | T | C | 0.40 | 0.05  | 0.01 | 1.86E-05  |
| BCL2L11 | rs6993770   | 8  | 105569300 | T | A | 0.29 | -0.10 | 0.01 | 4.44E-17  |
| BCL2L11 | rs10761737  | 10 | 63292445  | C | T | 0.41 | 0.08  | 0.01 | 3.48E-13  |
| BCL2L11 | rs71354995  | 19 | 38301201  | G | A | 0.26 | -0.21 | 0.01 | 5.91E-64  |
| BCL2L11 | rs892090    | 19 | 55027704  | G | T | 0.83 | 0.11  | 0.01 | 2.34E-12  |
| BCR     | rs149005797 | 22 | 23142913  | C | T | 0.00 | -0.54 | 0.06 | 1.10E-07  |
| BGN     | rs744233    | 3  | 126530422 | A | G | 0.29 | 0.06  | 0.01 | 5.67E-07  |
| BGN     | rs3756074   | 4  | 73982348  | C | G | 0.05 | 0.15  | 0.02 | 1.32E-08  |
| BGN     | rs4463068   | 4  | 101880317 | T | A | 0.40 | 0.06  | 0.01 | 4.35E-07  |
| BGN     | rs9266095   | 6  | 31353550  | G | A | 0.21 | 0.09  | 0.01 | 5.51E-10  |
| BGN     | rs6993770   | 8  | 105569300 | T | A | 0.29 | 0.09  | 0.01 | 1.74E-13  |
| BGN     | rs7080386   | 10 | 63288546  | A | C | 0.41 | -0.07 | 0.01 | 3.35E-09  |
| BGN     | rs2511241   | 11 | 73234296  | T | C | 0.93 | -0.23 | 0.01 | 8.01E-25  |
| BGN     | rs77242536  | 14 | 87979796  | C | T | 0.14 | 0.07  | 0.01 | 1.08E-05  |
| BGN     | rs780989226 | 15 | 101208405 | T | A | 0.11 | 0.12  | 0.01 | 5.00E-11  |
| BGN     | rs61758388  | 16 | 17470454  | A | C | 0.03 | -0.36 | 0.02 | 6.95E-29  |
| BGN     | rs1654425   | 19 | 55027612  | C | T | 0.83 | -0.12 | 0.01 | 9.28E-14  |
| BGN     | rs4814837   | 20 | 19261036  | T | C | 0.34 | -0.06 | 0.01 | 7.85E-06  |
| BID     | rs142201367 | 4  | 186235350 | C | T | 0.50 | 0.08  | 0.01 | 1.03E-11  |
| BID     | rs10418046  | 19 | 53824615  | G | T | 0.21 | 0.10  | 0.01 | 2.70E-12  |
| BID     | rs183393610 | 22 | 17769676  | A | G | 0.01 | -0.40 | 0.05 | 5.09E-08  |
| BIN2    | rs1354034   | 3  | 56815721  | C | T | 0.60 | 0.06  | 0.01 | 4.37E-08  |
| BIN2    | rs112838960 | 5  | 132373340 | A | T | 0.52 | 0.05  | 0.01 | 4.85E-06  |
| BIN2    | rs6993770   | 8  | 105569300 | T | A | 0.29 | -0.06 | 0.01 | 1.24E-06  |
| BIN2    | rs149960700 | 12 | 51311384  | A | C | 0.11 | -0.18 | 0.01 | 3.31E-23  |
| BIRC2   | rs1354034   | 3  | 56815721  | C | T | 0.60 | 0.05  | 0.01 | 6.94E-06  |

|        |             |    |           |   |   |      |       |      |          |
|--------|-------------|----|-----------|---|---|------|-------|------|----------|
| BIRC2  | rs342298    | 7  | 106733200 | T | C | 0.46 | -0.05 | 0.01 | 2.64E-05 |
| BIRC2  | rs10761785  | 10 | 63559006  | T | G | 0.51 | 0.05  | 0.01 | 1.07E-05 |
| BIRC2  | rs61754131  | 11 | 102377675 | G | A | 0.00 | -0.68 | 0.08 | 2.34E-07 |
| BLMH   | rs1250258   | 2  | 215435462 | T | C | 0.74 | 0.06  | 0.01 | 4.63E-07 |
| BLMH   | -           | 3  | 52505864  | C | T | 0.01 | 0.92  | 0.04 | 9.05E-42 |
| BLMH   | rs1265889   | 6  | 32065839  | A | G | 0.17 | -0.07 | 0.01 | 2.54E-07 |
| BLMH   | rs1050565   | 17 | 30249058  | C | T | 0.33 | 0.57  | 0.01 | 0.00E+00 |
| BLVRB  | rs7776054   | 6  | 135097778 | G | A | 0.26 | -0.08 | 0.01 | 2.93E-09 |
| BLVRB  | rs149698066 | 19 | 40458157  | A | G | 0.01 | -1.45 | 0.05 | 3.36E-75 |
| BMP4   | rs2314145   | 1  | 19410349  | G | C | 0.23 | -0.06 | 0.01 | 2.34E-05 |
| BMP4   | rs535025308 | 11 | 74721143  | C | G | 0.04 | -0.35 | 0.02 | 8.25E-34 |
| BMP4   | rs35887873  | 11 | 126349501 | C | T | 0.23 | 0.07  | 0.01 | 4.73E-07 |
| BMP4   | rs11111765  | 12 | 103778741 | C | G | 0.26 | 0.06  | 0.01 | 3.71E-06 |
| BMP4   | rs186021206 | 17 | 7166093   | A | G | 0.01 | 0.76  | 0.05 | 3.01E-22 |
| BMP4   | rs704       | 17 | 28367840  | A | G | 0.47 | -0.06 | 0.01 | 2.14E-06 |
| BMP6   | rs68066031  | 2  | 224015781 | C | T | 0.23 | -0.07 | 0.01 | 2.96E-06 |
| BMP6   | rs1354034   | 3  | 56815721  | C | T | 0.60 | -0.21 | 0.01 | 8.80E-73 |
| BMP6   | rs3792386   | 3  | 123134833 | A | G | 0.59 | -0.05 | 0.01 | 1.32E-05 |
| BMP6   | rs5030062   | 3  | 186736391 | C | A | 0.37 | -0.09 | 0.01 | 9.53E-13 |
| BMP6   | -           | 4  | 186236113 | C | A | 0.51 | -0.15 | 0.01 | 7.28E-38 |
| BMP6   | rs2545801   | 5  | 177414338 | C | T | 0.74 | -0.10 | 0.01 | 2.52E-13 |
| BMP6   | rs2327009   | 6  | 7718027   | T | C | 0.48 | 0.13  | 0.01 | 3.55E-32 |
| BMP6   | rs6993770   | 8  | 105569300 | T | A | 0.29 | -0.08 | 0.01 | 9.42E-10 |
| BMP6   | rs10820606  | 9  | 96430637  | C | A | 0.23 | -0.11 | 0.01 | 3.17E-15 |
| BMP6   | rs2519093   | 9  | 133266456 | T | C | 0.18 | -0.09 | 0.01 | 2.41E-09 |
| BMP6   | rs12762934  | 10 | 102600127 | T | C | 0.32 | 0.10  | 0.01 | 4.32E-17 |
| BMP6   | rs535025308 | 11 | 74721143  | C | G | 0.04 | -0.18 | 0.02 | 2.47E-10 |
| BMP6   | rs996498    | 12 | 29365497  | G | A | 0.24 | 0.06  | 0.01 | 1.92E-05 |
| BMP6   | rs6580981   | 12 | 54329244  | A | G | 0.46 | 0.07  | 0.01 | 2.79E-10 |
| BMP6   | rs186021206 | 17 | 7166093   | A | G | 0.01 | 0.45  | 0.05 | 2.02E-08 |
| BMP6   | -           | 17 | 35682334  | C | T | 0.13 | 0.08  | 0.01 | 5.28E-06 |
| BMP6   | rs892090    | 19 | 55027704  | G | T | 0.83 | 0.10  | 0.01 | 2.37E-10 |
| BMP6   | rs2834720   | 21 | 35004542  | A | G | 0.27 | 0.06  | 0.01 | 2.15E-06 |
| BOC    | rs1260326   | 2  | 27508073  | C | T | 0.61 | 0.06  | 0.01 | 6.43E-08 |
| BOC    | rs3856718   | 3  | 113277371 | A | G | 0.17 | 0.20  | 0.01 | 1.05E-41 |
| BOC    | rs34437827  | 7  | 73509008  | G | A | 0.19 | 0.07  | 0.01 | 3.98E-06 |
| BOC    | rs56408342  | 8  | 22190977  | A | G | 0.05 | -0.15 | 0.02 | 5.28E-09 |
| BOC    | rs8176749   | 9  | 133255801 | T | C | 0.06 | 0.13  | 0.02 | 4.33E-08 |
| BOC    | rs145878042 | 12 | 47749532  | G | A | 0.01 | 0.24  | 0.04 | 2.65E-05 |
| BOC    | rs1037117   | 15 | 101528455 | A | G | 0.25 | -0.07 | 0.01 | 1.16E-06 |
| BOC    | rs186021206 | 17 | 7166093   | A | G | 0.01 | 0.54  | 0.05 | 1.07E-11 |
| BPIFB1 | rs1619599   | 3  | 12462791  | A | G | 0.58 | 0.08  | 0.01 | 6.75E-16 |
| BPIFB1 | rs7429705   | 3  | 72242073  | T | C | 0.70 | 0.06  | 0.01 | 1.78E-08 |
| BPIFB1 | rs791361    | 5  | 173781630 | C | A | 0.77 | 0.07  | 0.01 | 3.39E-08 |
| BPIFB1 | rs34978289  | 6  | 2504388   | T | C | 0.52 | 0.08  | 0.01 | 3.50E-15 |
| BPIFB1 | rs9389269   | 6  | 135106021 | C | T | 0.27 | 0.10  | 0.01 | 9.69E-18 |
| BPIFB1 | rs17489268  | 8  | 19994534  | A | T | 0.26 | 0.08  | 0.01 | 2.14E-11 |
| BPIFB1 | rs2721961   | 8  | 115645684 | G | T | 0.28 | -0.06 | 0.01 | 1.27E-06 |
| BPIFB1 | rs2980888   | 8  | 125495066 | C | T | 0.70 | 0.05  | 0.01 | 2.07E-06 |
| BPIFB1 | rs4878009   | 9  | 86719896  | A | G | 0.41 | -0.05 | 0.01 | 2.66E-07 |
| BPIFB1 | rs569255485 | 11 | 47549820  | T | G | 0.34 | -0.05 | 0.01 | 2.93E-06 |
| BPIFB1 | -           | 11 | 116752497 | T | A | 0.86 | 0.07  | 0.01 | 2.67E-06 |
| BPIFB1 | rs147233090 | 15 | 43735849  | T | C | 0.02 | -0.15 | 0.02 | 1.48E-05 |
| BPIFB1 | rs247617    | 16 | 56956804  | A | C | 0.32 | 0.11  | 0.01 | 8.65E-24 |
| BPIFB1 | rs12597477  | 16 | 78300974  | G | A | 0.20 | -0.07 | 0.01 | 7.19E-07 |
| BPIFB1 | rs116843064 | 19 | 8364439   | A | G | 0.02 | 0.20  | 0.02 | 1.36E-07 |

|          |             |    |           |   |   |      |       |      |           |
|----------|-------------|----|-----------|---|---|------|-------|------|-----------|
| BPIFB1   | rs681343    | 19 | 48703205  | T | C | 0.51 | 0.08  | 0.01 | 4.48E-16  |
| BPIFB1   | rs2424963   | 20 | 33106642  | C | T | 0.58 | -0.42 | 0.01 | 2.61E-307 |
| BRK1     | rs1354034   | 3  | 56815721  | C | T | 0.60 | 0.13  | 0.01 | 2.75E-31  |
| BRK1     | rs6054      | 4  | 154568456 | T | C | 0.01 | 0.41  | 0.05 | 1.21E-07  |
| BRK1     | rs342293    | 7  | 106731773 | G | C | 0.46 | -0.07 | 0.01 | 1.13E-10  |
| BRK1     | rs7896518   | 10 | 63344740  | G | A | 0.42 | 0.07  | 0.01 | 9.82E-10  |
| BRK1     | rs11605246  | 11 | 198062    | G | C | 0.23 | 0.09  | 0.01 | 9.94E-12  |
| BRK1     | rs707236    | 16 | 83769555  | A | T | 0.35 | -0.15 | 0.01 | 1.63E-36  |
| BRK1     | rs9897552   | 17 | 35647462  | A | G | 0.18 | 0.07  | 0.01 | 5.60E-06  |
| BRK1     | rs1065853   | 19 | 44909976  | T | G | 0.08 | -0.25 | 0.01 | 1.54E-32  |
| BSG      | rs61747728  | 1  | 179557079 | T | C | 0.04 | 0.18  | 0.02 | 2.90E-10  |
| BSG      | rs78444298  | 1  | 184702964 | A | G | 0.02 | 0.21  | 0.03 | 3.21E-07  |
| BSG      | rs1260326   | 2  | 27508073  | C | T | 0.61 | 0.06  | 0.01 | 3.45E-07  |
| BSG      | rs700753    | 7  | 46714086  | G | C | 0.65 | 0.06  | 0.01 | 3.00E-07  |
| BSG      | rs9987289   | 8  | 9325848   | G | A | 0.91 | -0.08 | 0.01 | 2.15E-05  |
| BSG      | rs2519093   | 9  | 133266456 | T | C | 0.18 | -0.15 | 0.01 | 1.32E-24  |
| BSG      | rs77924615  | 16 | 20381010  | A | G | 0.20 | -0.07 | 0.01 | 3.09E-07  |
| BSG      | rs200489612 | 17 | 7203059   | A | G | 0.01 | 0.43  | 0.05 | 1.70E-07  |
| BSG      | rs56101188  | 19 | 586745    | C | T | 0.09 | 0.24  | 0.01 | 9.03E-36  |
| BSG      | rs933224    | 22 | 36369958  | C | T | 0.68 | -0.05 | 0.01 | 1.69E-05  |
| BST1     | rs2302465   | 4  | 15707569  | A | G | 0.13 | -1.48 | 0.01 | 0.00E+00  |
| BST1     | rs199922514 | 8  | 9325592   | G | A | 0.91 | -0.06 | 0.01 | 1.31E-06  |
| BST1     | rs7952602   | 11 | 126363774 | C | G | 0.14 | -0.11 | 0.01 | 5.75E-24  |
| BST1     | rs186021206 | 17 | 7166093   | A | G | 0.01 | 0.54  | 0.03 | 5.05E-27  |
| BST1     | rs4760      | 19 | 43648948  | G | A | 0.16 | -0.21 | 0.01 | 1.69E-98  |
| BST2     | rs57683598  | 1  | 1005954   | A | G | 0.40 | 0.05  | 0.01 | 2.57E-05  |
| BST2     | rs2269615   | 1  | 172446311 | T | C | 0.56 | -0.05 | 0.01 | 3.44E-06  |
| BST2     | rs2111485   | 2  | 162254026 | G | A | 0.61 | 0.06  | 0.01 | 2.04E-07  |
| BST2     | rs4835265   | 4  | 145900258 | A | C | 0.16 | 0.07  | 0.01 | 3.50E-06  |
| BST2     | rs6926219   | 6  | 122399661 | A | G | 0.55 | -0.06 | 0.01 | 6.46E-07  |
| BST2     | rs505922    | 9  | 133273813 | C | T | 0.32 | 0.10  | 0.01 | 1.95E-18  |
| BST2     | rs17157266  | 11 | 62432345  | C | T | 0.18 | -0.07 | 0.01 | 4.31E-06  |
| BST2     | rs139269536 | 14 | 103105358 | G | C | 0.25 | 0.09  | 0.01 | 5.55E-11  |
| BST2     | rs12373325  | 18 | 58420416  | C | T | 0.80 | -0.06 | 0.01 | 5.12E-06  |
| BST2     | rs35251378  | 19 | 10349293  | A | G | 0.29 | -0.08 | 0.01 | 1.35E-11  |
| BST2     | rs8101243   | 19 | 17377984  | C | T | 0.96 | -0.34 | 0.02 | 3.78E-36  |
| BST2     | rs5992933   | 22 | 17974277  | T | G | 0.24 | -0.06 | 0.01 | 4.88E-06  |
| BTC      | rs1354034   | 3  | 56815721  | C | T | 0.60 | 0.05  | 0.01 | 6.96E-06  |
| BTC      | rs28549760  | 4  | 74794307  | C | A | 0.13 | -0.60 | 0.01 | 2.10E-272 |
| BTC      | rs342296    | 7  | 106732457 | A | G | 0.46 | -0.05 | 0.01 | 1.10E-05  |
| BTC      | rs7044478   | 9  | 97858720  | G | C | 0.33 | -0.06 | 0.01 | 5.62E-06  |
| BTC      | rs150230220 | 10 | 63142032  | T | A | 0.31 | 0.05  | 0.01 | 1.30E-05  |
| BTC      | rs60822569  | 12 | 54323724  | C | T | 0.55 | 0.06  | 0.01 | 8.72E-08  |
| BTN2A1   | rs61747728  | 1  | 179557079 | T | C | 0.04 | 0.19  | 0.02 | 2.35E-11  |
| BTN2A1   | rs143048713 | 3  | 46851683  | T | G | 0.10 | 0.08  | 0.01 | 1.51E-05  |
| BTN2A1   | rs72843784  | 6  | 26498530  | T | G | 0.11 | 0.47  | 0.01 | 2.89E-156 |
| BTN2A1   | rs1151851   | 12 | 120902336 | T | A | 0.41 | 0.05  | 0.01 | 6.16E-06  |
| BTN2A1   | rs77924615  | 16 | 20381010  | A | G | 0.20 | -0.08 | 0.01 | 3.73E-08  |
| BTN2A1   | rs186021206 | 17 | 7166093   | A | G | 0.01 | 0.52  | 0.05 | 4.34E-12  |
| BTN2A1   | rs2659005   | 17 | 81244914  | T | C | 0.44 | 0.06  | 0.01 | 1.86E-08  |
| BTN3A2   | rs9393710   | 6  | 26367605  | G | A | 0.13 | -0.95 | 0.01 | 0.00E+00  |
| BTN3A2   | rs3184504   | 12 | 111446804 | C | T | 0.52 | -0.08 | 0.01 | 2.95E-15  |
| BTN3A2   | rs74439742  | 16 | 57025515  | T | C | 0.17 | -0.10 | 0.01 | 3.89E-13  |
| C19orf12 | rs142552223 | 3  | 172516227 | A | G | 0.04 | -0.14 | 0.02 | 8.72E-06  |
| C19orf12 | rs705379    | 7  | 95324583  | A | G | 0.48 | 0.09  | 0.01 | 6.01E-14  |
| C19orf12 | rs16919942  | 11 | 94107249  | T | C | 0.11 | -0.09 | 0.01 | 4.96E-06  |

|          |             |    |           |   |   |      |       |      |           |
|----------|-------------|----|-----------|---|---|------|-------|------|-----------|
| C19orf12 | rs28929474  | 14 | 94378610  | T | C | 0.02 | 0.20  | 0.03 | 1.50E-06  |
| C19orf12 | rs146170087 | 19 | 29702747  | C | T | 0.00 | -0.98 | 0.12 | 1.49E-07  |
| C19orf12 | rs738409    | 22 | 43928847  | G | C | 0.22 | 0.10  | 0.01 | 2.96E-12  |
| C1QA     | rs12058824  | 1  | 22636557  | A | G | 0.08 | -0.63 | 0.01 | 5.57E-217 |
| C1QA     | rs188468174 | 1  | 24965206  | T | C | 0.01 | 0.21  | 0.03 | 2.27E-05  |
| C1QA     | rs2765501   | 1  | 157834858 | A | G | 0.40 | 0.07  | 0.01 | 4.01E-09  |
| C1QA     | rs6532770   | 4  | 98862518  | A | C | 0.24 | 0.15  | 0.01 | 1.36E-32  |
| C1QA     | rs546388    | 5  | 172901130 | T | C | 0.45 | -0.07 | 0.01 | 6.80E-10  |
| C1QA     | rs2734975   | 6  | 29865476  | A | C | 0.46 | -0.06 | 0.01 | 1.15E-08  |
| C1QA     | rs1727      | 10 | 89307012  | A | C | 0.72 | -0.11 | 0.01 | 7.03E-20  |
| C1QA     | rs573898146 | 11 | 122644975 | T | C | 0.37 | -0.05 | 0.01 | 2.76E-05  |
| C1QA     | rs4766578   | 12 | 111466567 | A | T | 0.50 | -0.06 | 0.01 | 4.66E-08  |
| C1QA     | rs7139746   | 13 | 49210231  | A | G | 0.68 | 0.05  | 0.01 | 9.71E-06  |
| C1QA     | rs2665399   | 17 | 59789061  | C | A | 0.84 | -0.09 | 0.01 | 1.44E-09  |
| C1QA     | rs117981338 | 17 | 73092704  | T | C | 0.01 | 0.40  | 0.03 | 7.06E-18  |
| C1QA     | rs55841020  | 18 | 48294801  | A | T | 0.17 | -0.08 | 0.01 | 1.43E-07  |
| C1QA     | rs28659908  | 19 | 35202217  | C | T | 0.40 | 0.06  | 0.01 | 9.51E-09  |
| C1QTNF1  | rs2498323   | 4  | 3449382   | A | G | 0.10 | 0.13  | 0.01 | 1.36E-12  |
| C1QTNF1  | rs12359178  | 10 | 17847614  | A | G | 0.14 | 0.10  | 0.01 | 1.38E-10  |
| C1QTNF1  | rs116539064 | 17 | 79022318  | T | C | 0.10 | 0.39  | 0.01 | 6.68E-92  |
| C1QTNF1  | rs2838952   | 21 | 45510249  | T | C | 0.03 | -0.24 | 0.02 | 5.45E-15  |
| C2       | rs1260326   | 2  | 27508073  | C | T | 0.61 | -0.07 | 0.01 | 2.02E-09  |
| C2       | -           | 6  | 31934288  | A | C | 0.01 | -2.27 | 0.04 | 9.78E-261 |
| C2       | rs56278466  | 10 | 17833858  | G | T | 0.66 | 0.11  | 0.01 | 1.99E-20  |
| C2       | -           | 12 | 7074470   | T | A | 0.14 | -0.09 | 0.01 | 2.05E-08  |
| C2CD2L   | rs142201367 | 4  | 186235350 | C | T | 0.49 | 0.05  | 0.01 | 8.67E-06  |
| C2CD2L   | rs640603    | 11 | 119093620 | A | G | 0.35 | -0.06 | 0.01 | 7.59E-06  |
| C4BPB    | rs140584594 | 1  | 109690361 | G | A | 0.73 | 0.06  | 0.01 | 2.05E-06  |
| C4BPB    | -           | 1  | 207112189 | C | T | 0.07 | -0.31 | 0.01 | 2.45E-46  |
| C4BPB    | rs805435    | 2  | 53837646  | C | A | 0.19 | 0.06  | 0.01 | 1.47E-05  |
| C4BPB    | rs2316653   | 3  | 90393775  | G | A | 0.50 | -0.06 | 0.01 | 1.17E-07  |
| C4BPB    | rs9822589   | 3  | 94212297  | A | G | 0.47 | 0.06  | 0.01 | 1.01E-07  |
| C4BPB    | rs687339    | 3  | 136213517 | T | C | 0.77 | -0.06 | 0.01 | 3.70E-06  |
| C4BPB    | rs28507491  | 4  | 76276498  | A | G | 0.38 | -0.05 | 0.01 | 5.20E-06  |
| C4BPB    | rs757795770 | 4  | 99065369  | C | A | 0.71 | 0.07  | 0.01 | 1.41E-08  |
| C4BPB    | rs601020    | 6  | 32605402  | A | G | 0.24 | -0.06 | 0.01 | 1.02E-06  |
| C4BPB    | rs4418728   | 10 | 93079967  | T | G | 0.45 | -0.05 | 0.01 | 1.28E-05  |
| C4BPB    | rs139130389 | 11 | 72139110  | A | C | 0.07 | -0.16 | 0.01 | 1.63E-14  |
| C4BPB    | rs11621792  | 14 | 24402720  | T | C | 0.45 | -0.05 | 0.01 | 8.62E-06  |
| C4BPB    | rs28929474  | 14 | 94378610  | T | C | 0.02 | 0.37  | 0.02 | 2.41E-22  |
| C4BPB    | rs9302635   | 16 | 72110275  | C | T | 0.18 | -0.14 | 0.01 | 1.45E-22  |
| C4BPB    | rs8178824   | 17 | 66228657  | T | C | 0.03 | 0.81  | 0.02 | 6.81E-145 |
| CA1      | rs3811444   | 1  | 247876149 | T | C | 0.33 | 0.08  | 0.01 | 4.10E-11  |
| CA1      | rs11759553  | 6  | 135101158 | T | A | 0.27 | -0.07 | 0.01 | 1.01E-08  |
| CA1      | rs12544332  | 8  | 85343981  | A | C | 0.59 | -0.09 | 0.01 | 1.06E-14  |
| CA1      | rs67544533  | 15 | 75069198  | G | A | 0.18 | -0.13 | 0.01 | 7.34E-20  |
| CA11     | rs646776    | 1  | 109275908 | T | C | 0.78 | 0.19  | 0.01 | 4.02E-41  |
| CA11     | rs727415    | 10 | 71822995  | A | T | 0.29 | -0.06 | 0.01 | 4.15E-06  |
| CA11     | -           | 19 | 48612661  | C | A | 0.20 | 0.08  | 0.01 | 4.79E-08  |
| CA12     | rs61747728  | 1  | 179557079 | T | C | 0.04 | 0.18  | 0.02 | 1.72E-09  |
| CA12     | rs1260326   | 2  | 27508073  | C | T | 0.61 | 0.07  | 0.01 | 3.25E-10  |
| CA12     | rs868399694 | 3  | 98885415  | T | A | 0.45 | 0.06  | 0.01 | 8.08E-07  |
| CA12     | rs13107325  | 4  | 102267552 | T | C | 0.08 | 0.13  | 0.01 | 6.62E-10  |
| CA12     | rs567141188 | 9  | 125628866 | A | T | 0.33 | 0.06  | 0.01 | 8.35E-07  |
| CA12     | rs12902855  | 15 | 53683717  | A | G | 0.48 | 0.06  | 0.01 | 2.31E-07  |
| CA12     | rs12916532  | 15 | 63381972  | C | T | 0.27 | -0.29 | 0.01 | 1.96E-119 |



|      |             |    |           |   |   |      |       |      |           |
|------|-------------|----|-----------|---|---|------|-------|------|-----------|
| CA12 | rs186021206 | 17 | 7166093   | A | G | 0.01 | 0.64  | 0.05 | 1.16E-16  |
| CA12 | rs796389476 | 17 | 49195807  | T | A | 0.10 | 0.13  | 0.01 | 1.77E-11  |
| CA12 | rs708686    | 19 | 5840608   | T | C | 0.27 | 0.11  | 0.01 | 2.07E-18  |
| CA13 | rs1354034   | 3  | 56815721  | C | T | 0.60 | 0.05  | 0.01 | 5.56E-06  |
| CA13 | rs56072918  | 8  | 85297179  | T | C | 0.07 | -0.52 | 0.01 | 6.05E-122 |
| CA13 | rs3847326   | 10 | 63572099  | G | A | 0.48 | -0.05 | 0.01 | 2.12E-05  |
| CA14 | rs1122967   | 1  | 150286426 | G | C | 0.51 | 0.17  | 0.01 | 1.28E-58  |
| CA14 | rs61431557  | 6  | 34749801  | T | C | 0.14 | -0.07 | 0.01 | 1.53E-05  |
| CA14 | rs2954021   | 8  | 125469835 | G | A | 0.50 | 0.07  | 0.01 | 1.47E-11  |
| CA14 | rs35746821  | 12 | 121922683 | A | C | 0.53 | 0.06  | 0.01 | 5.94E-08  |
| CA14 | rs8096658   | 18 | 79396537  | G | C | 0.49 | 0.05  | 0.01 | 1.08E-05  |
| CA2  | rs2980370   | 8  | 85847898  | G | A | 0.52 | 0.10  | 0.01 | 4.80E-20  |
| CA2  | rs66489920  | 8  | 105580311 | C | T | 0.29 | -0.05 | 0.01 | 1.56E-05  |
| CA3  | rs3811444   | 1  | 247876149 | T | C | 0.33 | 0.11  | 0.01 | 4.47E-22  |
| CA3  | rs1047891   | 2  | 210675783 | A | C | 0.31 | 0.09  | 0.01 | 1.99E-13  |
| CA3  | rs11759553  | 6  | 135101158 | T | A | 0.27 | -0.11 | 0.01 | 5.80E-21  |
| CA3  | rs2072696   | 8  | 85438822  | C | G | 0.24 | -0.18 | 0.01 | 3.27E-44  |
| CA3  | rs1867146   | 15 | 75062630  | G | C | 0.18 | -0.09 | 0.01 | 2.36E-10  |
| CA3  | rs11085824  | 19 | 12890733  | G | A | 0.38 | -0.06 | 0.01 | 5.25E-08  |
| CA4  | rs184775562 | 2  | 196704388 | C | T | 0.00 | 0.75  | 0.09 | 1.70E-07  |
| CA4  | rs78058190  | 2  | 218835276 | A | G | 0.05 | -0.19 | 0.02 | 7.48E-11  |
| CA4  | -           | 4  | 26048828  | A | C | 0.16 | 0.06  | 0.01 | 2.60E-05  |
| CA4  | rs115007843 | 4  | 82654059  | C | A | 0.18 | -0.07 | 0.01 | 2.23E-06  |
| CA4  | rs9270588   | 6  | 32593550  | T | C | 0.53 | 0.05  | 0.01 | 1.25E-06  |
| CA4  | rs582118    | 9  | 133270061 | G | A | 0.32 | 0.16  | 0.01 | 7.30E-43  |
| CA4  | rs10906857  | 10 | 15197499  | G | A | 0.41 | 0.05  | 0.01 | 8.89E-06  |
| CA4  | rs61729512  | 12 | 7485173   | A | G | 0.12 | 0.08  | 0.01 | 1.63E-06  |
| CA4  | rs117154637 | 17 | 60156793  | T | A | 0.04 | -0.82 | 0.02 | 7.02E-161 |
| CA4  | rs10642898  | 17 | 78397594  | G | C | 0.40 | 0.06  | 0.01 | 1.88E-06  |
| CA4  | rs4760      | 19 | 43648948  | G | A | 0.16 | -0.17 | 0.01 | 3.09E-28  |
| CA4  | rs12986064  | 19 | 54251270  | C | T | 0.51 | -0.07 | 0.01 | 1.33E-09  |
| CA5A | rs4835265   | 4  | 145900258 | A | C | 0.16 | 0.07  | 0.01 | 2.50E-07  |
| CA5A | rs4979373   | 9  | 114382224 | T | C | 0.49 | -0.05 | 0.01 | 1.18E-06  |
| CA5A | rs10883451  | 10 | 100164661 | C | T | 0.50 | -0.05 | 0.01 | 5.99E-06  |
| CA5A | rs55870502  | 16 | 87893616  | C | T | 0.19 | 0.81  | 0.01 | 0.00E+00  |
| CA5A | rs738409    | 22 | 43928847  | G | C | 0.22 | 0.05  | 0.01 | 2.58E-05  |
| CA6  | rs3765963   | 1  | 8974539   | G | A | 0.41 | 0.68  | 0.01 | 0.00E+00  |
| CA6  | rs946527    | 1  | 46020298  | C | T | 0.71 | -0.06 | 0.01 | 2.29E-06  |
| CA6  | rs351388    | 1  | 212249238 | G | C | 0.59 | -0.05 | 0.01 | 1.05E-05  |
| CA6  | rs891499    | 2  | 9974102   | C | G | 0.33 | 0.07  | 0.01 | 5.77E-11  |
| CA6  | rs557296878 | 2  | 60288320  | C | T | 0.59 | 0.07  | 0.01 | 2.61E-12  |
| CA6  | rs6752452   | 2  | 225937638 | G | T | 0.15 | -0.07 | 0.01 | 6.56E-07  |
| CA6  | rs836143    | 11 | 34514038  | C | G | 0.67 | -0.05 | 0.01 | 9.31E-08  |
| CA6  | rs4256938   | 11 | 94590411  | A | G | 0.09 | -0.12 | 0.01 | 1.91E-14  |
| CA6  | rs290371    | 15 | 95217879  | A | G | 0.36 | -0.07 | 0.01 | 5.99E-13  |
| CA6  | rs56156922  | 16 | 56953457  | C | T | 0.33 | 0.06  | 0.01 | 1.81E-08  |
| CA6  | rs1523135   | 17 | 49105958  | G | C | 0.72 | 0.05  | 0.01 | 8.95E-07  |
| CA6  | rs7250028   | 19 | 13842306  | G | T | 0.24 | 0.06  | 0.01 | 1.07E-07  |
| CA6  | rs601338    | 19 | 48703417  | A | G | 0.51 | 0.07  | 0.01 | 4.91E-12  |
| CA9  | rs9270160   | 6  | 32587777  | T | C | 0.16 | -0.08 | 0.01 | 9.63E-06  |
| CA9  | rs111709193 | 7  | 174999    | C | T | 0.19 | 0.08  | 0.01 | 1.76E-06  |
| CA9  | rs183985235 | 9  | 35677783  | A | C | 0.00 | -1.49 | 0.08 | 1.32E-30  |
| CA9  | rs56278466  | 10 | 17833858  | G | T | 0.66 | 0.14  | 0.01 | 3.83E-33  |
| CA9  | -           | 11 | 61197091  | C | A | 0.34 | 0.06  | 0.01 | 5.06E-06  |
| CA9  | rs616114    | 18 | 32217958  | T | C | 0.39 | 0.08  | 0.01 | 1.81E-12  |
| CA9  | rs2608894   | 19 | 5847989   | C | T | 0.76 | -0.07 | 0.01 | 1.72E-06  |

|          |             |    |           |   |   |      |       |      |           |
|----------|-------------|----|-----------|---|---|------|-------|------|-----------|
| CA9      | rs516246    | 19 | 48702915  | T | C | 0.51 | -0.05 | 0.01 | 2.02E-05  |
| CALB1    | rs143241372 | 8  | 90111355  | G | A | 0.01 | 0.65  | 0.04 | 1.74E-26  |
| CALB1    | rs9529913   | 13 | 71770957  | T | C | 0.60 | -0.09 | 0.01 | 1.46E-13  |
| CALB1    | rs6127099   | 20 | 54114863  | T | A | 0.28 | -0.06 | 0.01 | 1.22E-06  |
| CALB2    | -           | 16 | 71136766  | C | A | 0.28 | -0.07 | 0.01 | 2.08E-08  |
| CALCA    | rs12619508  | 2  | 113224463 | A | C | 0.47 | 0.07  | 0.01 | 2.54E-12  |
| CALCA    | rs73995235  | 2  | 232331827 | T | G | 0.06 | -0.11 | 0.01 | 2.99E-08  |
| CALCA    | rs7008914   | 8  | 26022884  | C | T | 0.26 | -0.05 | 0.01 | 4.25E-06  |
| CALCA    | rs10766197  | 11 | 14900334  | A | G | 0.45 | -0.10 | 0.01 | 1.92E-28  |
| CALCA    | rs10841569  | 12 | 20581905  | G | A | 0.15 | 0.09  | 0.01 | 8.92E-11  |
| CALCA    | rs138903858 | 14 | 105168150 | T | G | 0.03 | -0.14 | 0.02 | 2.57E-06  |
| CALCA    | rs3790163   | 20 | 10667303  | G | A | 0.79 | 0.07  | 0.01 | 1.88E-08  |
| CALCOCO1 | rs1354034   | 3  | 56815721  | C | T | 0.60 | 0.07  | 0.01 | 1.10E-08  |
| CALCOCO1 | rs342293    | 7  | 106731773 | G | C | 0.46 | -0.06 | 0.01 | 9.22E-07  |
| CALCOCO1 | rs6993770   | 8  | 105569300 | T | A | 0.29 | -0.07 | 0.01 | 1.11E-08  |
| CALCOCO1 | rs17102261  | 12 | 53732948  | G | T | 0.15 | 0.14  | 0.01 | 1.09E-18  |
| CAMKK1   | rs342296    | 7  | 106732457 | A | G | 0.46 | -0.06 | 0.01 | 3.17E-07  |
| CAMKK1   | rs4759076   | 12 | 54336088  | C | T | 0.46 | 0.08  | 0.01 | 1.30E-10  |
| CAMKK1   | rs753513    | 17 | 3890178   | T | C | 0.29 | -0.30 | 0.01 | 5.56E-125 |
| CANT1    | rs61747728  | 1  | 179557079 | T | C | 0.04 | 0.15  | 0.02 | 9.43E-07  |
| CANT1    | rs1863622   | 3  | 186678827 | C | T | 0.22 | -0.08 | 0.01 | 2.60E-08  |
| CANT1    | -           | 8  | 105561296 | C | A | 0.27 | -0.07 | 0.01 | 5.14E-07  |
| CANT1    | rs10813956  | 9  | 33145545  | C | T | 0.49 | -0.05 | 0.01 | 7.24E-06  |
| CANT1    | rs56278466  | 10 | 17833858  | G | T | 0.66 | 0.09  | 0.01 | 1.28E-13  |
| CANT1    | rs423135    | 16 | 89674465  | A | G | 0.52 | 0.06  | 0.01 | 7.65E-07  |
| CANT1    | rs17739056  | 17 | 78999123  | C | T | 0.12 | -0.21 | 0.01 | 1.45E-32  |
| CANT1    | rs1654425   | 19 | 55027612  | C | T | 0.83 | 0.11  | 0.01 | 7.96E-12  |
| CAPG     | rs6886      | 2  | 85394936  | C | T | 0.67 | -0.87 | 0.01 | 0.00E+00  |
| CAPG     | rs9270270   | 6  | 32589431  | C | T | 0.84 | -0.08 | 0.01 | 7.35E-10  |
| CAPG     | rs4632248   | 19 | 53821741  | T | G | 0.21 | 0.18  | 0.01 | 5.45E-67  |
| CARHSP1  | rs12597479  | 16 | 8809732   | T | G | 0.53 | -0.08 | 0.01 | 4.12E-12  |
| CASP1    | rs142032527 | 7  | 150521013 | T | A | 0.24 | -0.06 | 0.01 | 3.55E-06  |
| CASP1    | rs34436714  | 19 | 53824059  | A | C | 0.21 | 0.32  | 0.01 | 4.10E-116 |
| CASP10   | rs7576306   | 2  | 201209805 | G | A | 0.49 | 0.18  | 0.01 | 7.32E-58  |
| CASP10   | rs1354034   | 3  | 56815721  | C | T | 0.60 | 0.05  | 0.01 | 2.24E-05  |
| CASP10   | rs6993770   | 8  | 105569300 | T | A | 0.29 | -0.09 | 0.01 | 4.86E-13  |
| CASP2    | rs1354034   | 3  | 56815721  | C | T | 0.60 | 0.10  | 0.01 | 4.32E-17  |
| CASP2    | rs139141690 | 7  | 101856650 | A | G | 0.00 | 0.38  | 0.05 | 9.09E-06  |
| CASP2    | rs11502185  | 11 | 180258    | C | T | 0.26 | 0.07  | 0.01 | 7.47E-06  |
| CASP3    | rs13136635  | 4  | 184653653 | T | C | 0.88 | 0.17  | 0.01 | 3.85E-22  |
| CASP3    | rs6993770   | 8  | 105569300 | T | A | 0.29 | -0.08 | 0.01 | 1.26E-09  |
| CASP8    | rs34841024  | 2  | 201286417 | G | T | 0.14 | 0.31  | 0.01 | 5.78E-82  |
| CASP8    | rs1354034   | 3  | 56815721  | C | T | 0.60 | 0.07  | 0.01 | 3.23E-09  |
| CASP8    | rs3847326   | 10 | 63572099  | G | A | 0.48 | -0.05 | 0.01 | 2.67E-06  |
| CASP8    | rs60822569  | 12 | 54323724  | C | T | 0.55 | 0.06  | 0.01 | 2.30E-08  |
| CBLIF    | rs333947    | 1  | 109928142 | A | G | 0.15 | -0.07 | 0.01 | 1.78E-06  |
| CBLIF    | rs2348194   | 3  | 12534091  | T | A | 0.38 | 0.05  | 0.01 | 1.25E-05  |
| CBLIF    | rs13088531  | 3  | 151259575 | A | T | 0.25 | -0.06 | 0.01 | 1.82E-06  |
| CBLIF    | rs1290790   | 3  | 169373781 | T | A | 0.45 | -0.06 | 0.01 | 3.10E-08  |
| CBLIF    | rs72704793  | 5  | 547893    | A | G | 0.33 | 0.06  | 0.01 | 2.80E-08  |
| CBLIF    | rs7718236   | 5  | 180827869 | A | G | 0.83 | -0.09 | 0.01 | 2.71E-09  |
| CBLIF    | rs1634726   | 6  | 31018051  | A | G | 0.15 | -0.11 | 0.01 | 6.41E-12  |
| CBLIF    | rs807309    | 6  | 119644095 | T | C | 0.74 | -0.46 | 0.01 | 1.31E-293 |
| CBLIF    | rs34635647  | 8  | 142675472 | G | A | 0.44 | -0.05 | 0.01 | 2.70E-06  |
| CBLIF    | rs2519093   | 9  | 133266456 | T | C | 0.18 | -0.21 | 0.01 | 3.03E-52  |
| CBLIF    | rs56278466  | 10 | 17833858  | G | T | 0.66 | 0.07  | 0.01 | 9.18E-10  |

|        |             |    |           |   |   |      |       |      |          |
|--------|-------------|----|-----------|---|---|------|-------|------|----------|
| CBLIF  | rs2472632   | 11 | 27374328  | A | C | 0.36 | -0.06 | 0.01 | 1.49E-07 |
| CBLIF  | rs1787909   | 11 | 61202571  | C | G | 0.34 | -0.22 | 0.01 | 2.93E-85 |
| CBLIF  | rs7929203   | 11 | 69157271  | T | C | 0.28 | 0.06  | 0.01 | 4.33E-06 |
| CBLIF  | rs117908897 | 17 | 17681832  | C | T | 0.54 | -0.06 | 0.01 | 1.96E-07 |
| CBLIF  | rs61580404  | 17 | 76641961  | T | G | 0.10 | 0.08  | 0.01 | 1.18E-05 |
| CBLIF  | rs584768    | 19 | 48710027  | A | G | 0.53 | 0.05  | 0.01 | 2.98E-06 |
| CBLN4  | rs7684253   | 4  | 56861145  | T | C | 0.55 | -0.10 | 0.01 | 8.41E-18 |
| CBLN4  | rs35887873  | 11 | 126349501 | C | T | 0.23 | 0.08  | 0.01 | 9.74E-10 |
| CBLN4  | rs215226    | 12 | 482134    | G | A | 0.40 | 0.06  | 0.01 | 7.40E-07 |
| CBLN4  | rs186021206 | 17 | 7166093   | A | G | 0.01 | 0.48  | 0.05 | 3.58E-10 |
| CBLN4  | rs12624596  | 20 | 55714960  | A | G | 0.29 | 0.19  | 0.01 | 5.20E-52 |
| CC2D1A | rs1354034   | 3  | 56815721  | C | T | 0.60 | 0.05  | 0.01 | 1.93E-05 |
| CC2D1A | rs61740117  | 19 | 13913456  | T | C | 0.01 | -0.32 | 0.03 | 4.89E-11 |
| CCDC80 | rs6772337   | 3  | 112643341 | G | A | 0.62 | -0.06 | 0.01 | 7.30E-09 |
| CCDC80 | rs13107325  | 4  | 102267552 | T | C | 0.08 | 0.14  | 0.01 | 6.00E-12 |
| CCDC80 | rs41265930  | 6  | 160543103 | C | T | 0.07 | -0.14 | 0.01 | 7.22E-13 |
| CCDC80 | -           | 7  | 7216532   | C | T | 0.61 | 0.06  | 0.01 | 4.39E-09 |
| CCDC80 | rs2142306   | 8  | 133458388 | C | T | 0.41 | 0.13  | 0.01 | 1.47E-34 |
| CCDC80 | rs186021206 | 17 | 7166093   | A | G | 0.01 | 0.93  | 0.05 | 5.00E-39 |
| CCL11  | rs12075     | 1  | 159205564 | A | G | 0.58 | 0.08  | 0.01 | 6.18E-13 |
| CCL11  | rs2228467   | 3  | 42864624  | C | T | 0.06 | 0.41  | 0.01 | 4.31E-75 |
| CCL11  | rs3181077   | 3  | 46209161  | T | C | 0.71 | -0.08 | 0.01 | 2.58E-11 |
| CCL11  | rs1354034   | 3  | 56815721  | C | T | 0.60 | -0.05 | 0.01 | 1.57E-06 |
| CCL11  | rs2516471   | 6  | 31432515  | A | G | 0.06 | -0.11 | 0.01 | 4.83E-07 |
| CCL11  | rs10808297  | 7  | 75833981  | G | A | 0.90 | -0.21 | 0.01 | 1.15E-33 |
| CCL11  | rs4602861   | 8  | 105578478 | G | A | 0.27 | -0.06 | 0.01 | 2.85E-06 |
| CCL11  | rs7080386   | 10 | 63288546  | A | C | 0.41 | 0.07  | 0.01 | 2.16E-09 |
| CCL11  | rs5818270   | 16 | 79995164  | T | C | 0.58 | -0.07 | 0.01 | 1.40E-09 |
| CCL11  | rs140905292 | 17 | 34188515  | A | G | 0.22 | -0.12 | 0.01 | 7.25E-20 |
| CCL11  | rs1613662   | 19 | 55025227  | A | G | 0.83 | 0.09  | 0.01 | 1.54E-10 |
| CCL11  | rs55951234  | 22 | 38205423  | T | C | 0.58 | 0.05  | 0.01 | 8.28E-06 |
| CCL13  | rs12075     | 1  | 159205564 | A | G | 0.58 | 0.22  | 0.01 | 6.54E-92 |
| CCL13  | rs13412535  | 2  | 224010157 | A | G | 0.23 | -0.07 | 0.01 | 8.33E-08 |
| CCL13  | rs7433284   | 3  | 42831098  | A | G | 0.38 | -0.11 | 0.01 | 2.58E-21 |
| CCL13  | rs12495098  | 3  | 46301011  | G | T | 0.07 | 0.11  | 0.01 | 5.43E-07 |
| CCL13  | rs2522051   | 5  | 132461886 | C | T | 0.45 | 0.05  | 0.01 | 3.17E-06 |
| CCL13  | rs3135369   | 6  | 32419444  | A | G | 0.23 | 0.06  | 0.01 | 8.55E-07 |
| CCL13  | rs2842059   | 6  | 70635151  | A | C | 0.30 | -0.06 | 0.01 | 4.81E-06 |
| CCL13  | rs826732    | 8  | 58830080  | C | G | 0.50 | 0.05  | 0.01 | 8.67E-06 |
| CCL13  | rs2737245   | 8  | 115646356 | T | G | 0.28 | 0.10  | 0.01 | 1.65E-16 |
| CCL13  | rs7080386   | 10 | 63288546  | A | C | 0.41 | 0.07  | 0.01 | 2.84E-11 |
| CCL13  | rs11064074  | 12 | 6171873   | T | C | 0.46 | -0.05 | 0.01 | 1.15E-05 |
| CCL13  | rs59001897  | 15 | 64868193  | A | T | 0.17 | 0.07  | 0.01 | 6.16E-07 |
| CCL13  | rs12445050  | 16 | 81837364  | T | C | 0.14 | 0.08  | 0.01 | 7.23E-07 |
| CCL13  | rs3136674   | 17 | 34355597  | C | T | 0.05 | -0.46 | 0.02 | 2.14E-80 |
| CCL13  | rs892090    | 19 | 55027704  | G | T | 0.83 | 0.14  | 0.01 | 2.05E-21 |
| CCL14  | rs13962     | 1  | 159205737 | A | G | 0.18 | 0.17  | 0.01 | 2.35E-32 |
| CCL14  | rs13412535  | 2  | 224010157 | A | G | 0.23 | -0.07 | 0.01 | 3.49E-07 |
| CCL14  | rs1354034   | 3  | 56815721  | C | T | 0.60 | -0.06 | 0.01 | 6.77E-09 |
| CCL14  | rs6993770   | 8  | 105569300 | T | A | 0.29 | -0.07 | 0.01 | 9.62E-10 |
| CCL14  | rs774510679 | 10 | 63304076  | A | C | 0.41 | 0.06  | 0.01 | 4.31E-08 |
| CCL14  | rs9903158   | 17 | 35985301  | C | T | 0.05 | -1.01 | 0.02 | 0.00E+00 |
| CCL14  | rs1671152   | 19 | 55014977  | G | T | 0.84 | 0.10  | 0.01 | 3.80E-12 |
| CCL15  | rs10874777  | 1  | 93396463  | C | T | 0.63 | 0.04  | 0.01 | 8.83E-06 |
| CCL15  | rs28817415  | 4  | 76480299  | T | C | 0.46 | 0.04  | 0.01 | 1.74E-05 |
| CCL15  | rs782134971 | 9  | 133264504 | G | C | 0.25 | -0.14 | 0.01 | 1.39E-36 |

|       |             |    |           |   |   |      |       |      |           |
|-------|-------------|----|-----------|---|---|------|-------|------|-----------|
| CCL15 | rs28929474  | 14 | 94378610  | T | C | 0.02 | 0.26  | 0.02 | 4.33E-15  |
| CCL15 | -           | 17 | 36001607  | C | G | 0.93 | -1.57 | 0.01 | 0.00E+00  |
| CCL15 | rs601338    | 19 | 48703417  | A | G | 0.51 | -0.18 | 0.01 | 1.44E-83  |
| CCL16 | rs11127048  | 2  | 27529596  | A | G | 0.62 | -0.04 | 0.01 | 2.02E-05  |
| CCL16 | rs1047891   | 2  | 210675783 | A | C | 0.31 | -0.05 | 0.01 | 3.50E-06  |
| CCL16 | rs4682860   | 3  | 42822312  | G | A | 0.61 | -0.04 | 0.01 | 2.44E-05  |
| CCL16 | rs3134984   | 6  | 32677252  | A | T | 0.21 | -0.08 | 0.01 | 2.34E-10  |
| CCL16 | rs35493868  | 7  | 73625076  | G | C | 0.20 | -0.06 | 0.01 | 1.82E-06  |
| CCL16 | rs964184    | 11 | 116778201 | C | G | 0.87 | -0.06 | 0.01 | 2.56E-05  |
| CCL16 | rs28929474  | 14 | 94378610  | T | C | 0.02 | 0.15  | 0.02 | 6.11E-06  |
| CCL16 | rs112689088 | 17 | 35980421  | C | T | 0.10 | -1.32 | 0.01 | 0.00E+00  |
| CCL16 | rs4911405   | 20 | 34087161  | T | C | 0.65 | 0.05  | 0.01 | 1.58E-07  |
| CCL17 | rs12075     | 1  | 159205564 | A | G | 0.58 | 0.05  | 0.01 | 3.09E-06  |
| CCL17 | rs142289859 | 3  | 16913449  | C | T | 0.03 | -0.55 | 0.02 | 1.25E-72  |
| CCL17 | rs116135711 | 3  | 33030977  | C | T | 0.04 | -0.17 | 0.02 | 4.41E-08  |
| CCL17 | rs2228467   | 3  | 42864624  | C | T | 0.06 | 0.42  | 0.02 | 1.06E-74  |
| CCL17 | rs11925560  | 3  | 47217970  | T | A | 0.39 | 0.06  | 0.01 | 6.92E-08  |
| CCL17 | rs771327    | 3  | 101815656 | G | A | 0.56 | 0.06  | 0.01 | 8.66E-07  |
| CCL17 | rs3804749   | 3  | 123114156 | T | C | 0.59 | -0.05 | 0.01 | 1.31E-05  |
| CCL17 | rs2073643   | 5  | 132387596 | C | T | 0.55 | -0.06 | 0.01 | 2.39E-07  |
| CCL17 | rs3763287   | 6  | 31402552  | A | C | 0.06 | -0.10 | 0.01 | 6.67E-06  |
| CCL17 | rs6993770   | 8  | 105569300 | T | A | 0.29 | -0.13 | 0.01 | 2.74E-29  |
| CCL17 | rs61469632  | 9  | 132986603 | C | T | 0.06 | -0.11 | 0.01 | 4.31E-07  |
| CCL17 | rs71474568  | 10 | 102589091 | G | T | 0.34 | 0.05  | 0.01 | 1.71E-05  |
| CCL17 | rs10886430  | 10 | 119250744 | G | A | 0.13 | -0.36 | 0.01 | 1.13E-106 |
| CCL17 | rs9302690   | 16 | 57409056  | A | G | 0.08 | 0.38  | 0.01 | 6.83E-78  |
| CCL17 | rs1654425   | 19 | 55027612  | C | T | 0.83 | 0.08  | 0.01 | 1.08E-08  |
| CCL18 | rs6715862   | 2  | 42101435  | G | A | 0.50 | -0.08 | 0.01 | 9.97E-14  |
| CCL18 | rs2015086   | 17 | 36064257  | G | A | 0.13 | 0.70  | 0.01 | 0.00E+00  |
| CCL18 | rs145144275 | 19 | 58350442  | G | A | 0.01 | -0.34 | 0.04 | 1.18E-09  |
| CCL18 | rs56298400  | 20 | 40496162  | A | G | 0.08 | 0.08  | 0.01 | 1.44E-05  |
| CCL19 | rs2476601   | 1  | 113834946 | G | A | 0.90 | -0.11 | 0.01 | 3.43E-09  |
| CCL19 | rs2305625   | 3  | 132522666 | T | C | 0.11 | -0.15 | 0.01 | 1.18E-17  |
| CCL19 | rs201980192 | 6  | 32641286  | T | C | 0.02 | 0.88  | 0.03 | 7.54E-102 |
| CCL19 | rs10972202  | 9  | 34707817  | T | C | 0.12 | 0.10  | 0.01 | 1.31E-09  |
| CCL19 | rs35350651  | 12 | 111469627 | C | A | 0.50 | -0.06 | 0.01 | 7.60E-09  |
| CCL19 | rs2412973   | 22 | 30133642  | A | C | 0.44 | -0.05 | 0.01 | 1.87E-06  |
| CCL2  | rs12075     | 1  | 159205564 | A | G | 0.58 | 0.24  | 0.01 | 3.22E-110 |
| CCL2  | rs2228467   | 3  | 42864624  | C | T | 0.06 | 0.13  | 0.01 | 7.71E-09  |
| CCL2  | rs10510751  | 3  | 46304534  | G | T | 0.07 | 0.28  | 0.01 | 9.09E-41  |
| CCL2  | rs1130580   | 6  | 31268902  | C | T | 0.29 | -0.05 | 0.01 | 1.97E-05  |
| CCL2  | rs4541868   | 8  | 105578477 | A | C | 0.27 | -0.06 | 0.01 | 2.03E-06  |
| CCL2  | rs7080386   | 10 | 63288546  | A | C | 0.41 | 0.07  | 0.01 | 1.94E-09  |
| CCL2  | rs76428106  | 13 | 28029870  | C | T | 0.01 | -0.27 | 0.03 | 5.11E-08  |
| CCL2  | rs12601658  | 17 | 34206404  | A | T | 0.23 | -0.07 | 0.01 | 1.80E-07  |
| CCL2  | rs1671152   | 19 | 55014977  | G | T | 0.84 | 0.10  | 0.01 | 1.38E-11  |
| CCL20 | rs1395338   | 2  | 227783607 | A | G | 0.60 | 0.09  | 0.01 | 2.41E-15  |
| CCL20 | rs3129754   | 6  | 32615269  | G | A | 0.42 | 0.08  | 0.01 | 1.86E-12  |
| CCL20 | rs736794    | 6  | 41030094  | T | G | 0.36 | -0.08 | 0.01 | 2.11E-10  |
| CCL20 | rs77542162  | 17 | 69085137  | G | A | 0.02 | 0.26  | 0.02 | 2.83E-12  |
| CCL20 | rs117900576 | 17 | 74765056  | G | C | 0.03 | 0.18  | 0.02 | 1.41E-08  |
| CCL21 | rs4671127   | 2  | 65335836  | G | C | 0.34 | -0.05 | 0.01 | 1.80E-05  |
| CCL21 | rs1354034   | 3  | 56815721  | C | T | 0.60 | -0.06 | 0.01 | 3.57E-08  |
| CCL21 | rs11924792  | 3  | 132521256 | C | A | 0.11 | -0.18 | 0.01 | 1.96E-23  |
| CCL21 | rs17138669  | 5  | 116016941 | T | G | 0.14 | -0.09 | 0.01 | 3.80E-07  |
| CCL21 | rs17764730  | 5  | 128021834 | T | C | 0.25 | -0.09 | 0.01 | 1.71E-11  |

|       |             |    |           |   |   |      |       |      |           |
|-------|-------------|----|-----------|---|---|------|-------|------|-----------|
| CCL21 | rs12722013  | 6  | 33080683  | C | T | 0.05 | 0.32  | 0.02 | 2.60E-34  |
| CCL21 | rs10814138  | 9  | 34723038  | A | C | 0.32 | -0.10 | 0.01 | 1.29E-16  |
| CCL21 | rs3184504   | 12 | 111446804 | C | T | 0.52 | -0.08 | 0.01 | 1.65E-12  |
| CCL21 | rs62054656  | 16 | 90070213  | A | C | 0.06 | -0.11 | 0.01 | 5.07E-06  |
| CCL21 | rs17065796  | 18 | 59429782  | C | T | 0.37 | -0.05 | 0.01 | 1.54E-05  |
| CCL21 | rs2412973   | 22 | 30133642  | A | C | 0.44 | -0.07 | 0.01 | 4.33E-09  |
| CCL22 | rs4683339   | 3  | 42835249  | T | C | 0.40 | -0.05 | 0.01 | 1.87E-05  |
| CCL22 | rs13098877  | 3  | 188415375 | T | C | 0.44 | -0.05 | 0.01 | 4.00E-06  |
| CCL22 | rs9296027   | 6  | 32425285  | G | C | 0.12 | 0.08  | 0.01 | 2.62E-06  |
| CCL22 | rs1504215   | 6  | 90296508  | A | G | 0.35 | -0.06 | 0.01 | 1.59E-07  |
| CCL22 | rs3184504   | 12 | 111446804 | C | T | 0.52 | -0.06 | 0.01 | 6.94E-07  |
| CCL22 | rs41398344  | 16 | 57360481  | C | T | 0.01 | -0.84 | 0.04 | 2.84E-48  |
| CCL22 | rs77542162  | 17 | 69085137  | G | A | 0.02 | 0.51  | 0.02 | 5.04E-42  |
| CCL22 | rs11670056  | 19 | 18479133  | T | C | 0.07 | 0.11  | 0.01 | 8.77E-07  |
| CCL23 | rs61804164  | 1  | 161653235 | C | G | 0.12 | -0.08 | 0.01 | 1.44E-06  |
| CCL23 | rs780093    | 2  | 27519736  | C | T | 0.62 | -0.07 | 0.01 | 3.23E-09  |
| CCL23 | rs142021145 | 5  | 72460692  | A | C | 0.00 | 0.57  | 0.06 | 6.18E-10  |
| CCL23 | rs431204    | 6  | 32037490  | T | C | 0.12 | -0.08 | 0.01 | 2.62E-06  |
| CCL23 | rs964184    | 11 | 116778201 | C | G | 0.87 | -0.10 | 0.01 | 7.24E-11  |
| CCL23 | rs7484541   | 12 | 57321020  | T | A | 0.23 | -0.06 | 0.01 | 4.46E-06  |
| CCL23 | rs11545007  | 16 | 30532720  | A | C | 0.01 | -0.34 | 0.04 | 3.15E-08  |
| CCL23 | rs712048    | 17 | 35999179  | C | A | 0.87 | 0.56  | 0.01 | 9.55E-251 |
| CCL23 | rs7412      | 19 | 44908822  | T | C | 0.08 | 0.12  | 0.01 | 6.87E-09  |
| CCL24 | rs12083692  | 1  | 114489767 | T | A | 0.26 | -0.05 | 0.01 | 3.29E-11  |
| CCL24 | rs2228467   | 3  | 42864624  | C | T | 0.06 | 0.17  | 0.01 | 7.62E-33  |
| CCL24 | rs2201150   | 3  | 46217411  | C | T | 0.63 | -0.03 | 0.00 | 1.36E-05  |
| CCL24 | rs9799792   | 4  | 975534    | C | T | 0.56 | 0.03  | 0.00 | 7.39E-06  |
| CCL24 | rs115216147 | 5  | 71369699  | A | T | 0.07 | -0.08 | 0.01 | 7.25E-08  |
| CCL24 | rs111872865 | 6  | 360124    | A | G | 0.01 | 0.16  | 0.02 | 7.73E-06  |
| CCL24 | rs2024050   | 7  | 75831075  | G | A | 0.90 | -1.37 | 0.01 | 0.00E+00  |
| CCL24 | rs71558590  | 8  | 70284854  | G | A | 0.15 | 0.04  | 0.01 | 2.71E-05  |
| CCL24 | rs4876611   | 8  | 115659621 | G | A | 0.72 | 0.04  | 0.01 | 1.48E-06  |
| CCL24 | rs13294683  | 9  | 79664852  | T | C | 0.10 | 0.07  | 0.01 | 6.04E-09  |
| CCL24 | rs10769256  | 11 | 47356845  | T | C | 0.40 | 0.06  | 0.00 | 5.83E-16  |
| CCL24 | rs201510256 | 11 | 55025163  | T | C | 0.47 | -0.04 | 0.01 | 1.38E-06  |
| CCL24 | rs2939849   | 15 | 90075850  | G | C | 0.40 | 0.06  | 0.00 | 1.14E-14  |
| CCL24 | rs1121985   | 16 | 79329182  | C | A | 0.62 | 0.05  | 0.00 | 4.39E-11  |
| CCL24 | rs11480320  | 20 | 53916157  | T | A | 0.58 | 0.03  | 0.00 | 1.83E-05  |
| CCL25 | rs9275576   | 6  | 32711549  | T | C | 0.14 | 0.06  | 0.01 | 3.55E-06  |
| CCL25 | -           | 6  | 160748021 | C | T | 0.02 | -0.20 | 0.02 | 2.59E-08  |
| CCL25 | rs60270701  | 8  | 10714010  | G | C | 0.07 | 0.09  | 0.01 | 9.00E-08  |
| CCL25 | rs118062058 | 8  | 42245860  | G | A | 0.06 | -0.15 | 0.01 | 8.00E-14  |
| CCL25 | -           | 9  | 133263362 | G | A | 0.18 | -0.27 | 0.01 | 1.18E-120 |
| CCL25 | rs7295693   | 12 | 467630    | C | T | 0.59 | 0.12  | 0.01 | 1.57E-40  |
| CCL25 | rs186021206 | 17 | 7166093   | A | G | 0.01 | 0.40  | 0.04 | 2.41E-10  |
| CCL25 | rs7222664   | 17 | 9881966   | C | G | 0.33 | 0.04  | 0.01 | 5.76E-06  |
| CCL25 | rs112001035 | 17 | 68827664  | A | G | 0.06 | -0.10 | 0.01 | 7.78E-07  |
| CCL25 | rs2032887   | 19 | 8056476   | G | A | 0.24 | 0.76  | 0.01 | 0.00E+00  |
| CCL25 | rs601338    | 19 | 48703417  | A | G | 0.51 | -0.39 | 0.01 | 6.23E-280 |
| CCL25 | rs34710186  | 20 | 32400102  | A | T | 0.81 | 0.06  | 0.01 | 9.96E-08  |
| CCL26 | rs12075     | 1  | 159205564 | A | G | 0.58 | 0.19  | 0.01 | 3.91E-64  |
| CCL26 | rs13412535  | 2  | 224010157 | A | G | 0.23 | -0.06 | 0.01 | 1.78E-05  |
| CCL26 | rs200838    | 5  | 132374707 | C | A | 0.52 | 0.05  | 0.01 | 1.15E-05  |
| CCL26 | rs3135383   | 6  | 32453024  | G | T | 0.13 | -0.09 | 0.01 | 9.59E-08  |
| CCL26 | rs41463245  | 7  | 75771945  | T | C | 0.01 | -1.01 | 0.04 | 1.65E-64  |
| CCL26 | -           | 8  | 105561296 | C | A | 0.27 | -0.07 | 0.01 | 2.53E-07  |

|       |             |    |           |   |   |      |       |      |           |
|-------|-------------|----|-----------|---|---|------|-------|------|-----------|
| CCL26 | rs10761731  | 10 | 63267850  | T | A | 0.42 | 0.06  | 0.01 | 2.66E-07  |
| CCL26 | rs1654425   | 19 | 55027612  | C | T | 0.83 | 0.09  | 0.01 | 6.31E-10  |
| CCL27 | rs1150756   | 6  | 32067917  | T | C | 0.13 | -0.10 | 0.01 | 6.95E-10  |
| CCL27 | rs118039278 | 6  | 160564494 | A | G | 0.08 | 0.11  | 0.01 | 1.59E-07  |
| CCL27 | rs2070074   | 9  | 34649445  | G | A | 0.10 | -0.33 | 0.01 | 1.65E-72  |
| CCL27 | rs964184    | 11 | 116778201 | C | G | 0.87 | -0.10 | 0.01 | 6.87E-11  |
| CCL27 | rs77542162  | 17 | 69085137  | G | A | 0.02 | 0.31  | 0.02 | 2.17E-17  |
| CCL27 | rs7412      | 19 | 44908822  | T | C | 0.08 | 0.15  | 0.01 | 7.23E-14  |
| CCL27 | rs2569491   | 19 | 51081659  | A | G | 0.30 | -0.06 | 0.01 | 8.77E-07  |
| CCL27 | rs74278448  | 22 | 46139068  | G | C | 0.70 | 0.10  | 0.01 | 6.21E-17  |
| CCL28 | rs7535275   | 1  | 150381734 | G | A | 0.13 | -0.08 | 0.01 | 4.75E-06  |
| CCL28 | rs6671171   | 1  | 156901526 | A | G | 0.11 | 0.08  | 0.01 | 3.43E-06  |
| CCL28 | rs3732083   | 2  | 206176329 | C | T | 0.43 | -0.18 | 0.01 | 5.38E-58  |
| CCL28 | rs13412535  | 2  | 224010157 | A | G | 0.23 | -0.15 | 0.01 | 7.21E-30  |
| CCL28 | rs2278668   | 3  | 123116385 | C | T | 0.59 | -0.07 | 0.01 | 5.77E-09  |
| CCL28 | rs55874224  | 3  | 143101628 | C | G | 0.39 | 0.07  | 0.01 | 1.34E-08  |
| CCL28 | rs11734132  | 4  | 6889792   | C | G | 0.17 | -0.06 | 0.01 | 2.79E-05  |
| CCL28 | rs200708155 | 5  | 43560059  | T | G | 0.50 | -0.06 | 0.01 | 8.04E-07  |
| CCL28 | rs114694170 | 5  | 88884379  | C | T | 0.06 | 0.11  | 0.02 | 2.76E-06  |
| CCL28 | rs112838960 | 5  | 132373340 | A | T | 0.52 | 0.07  | 0.01 | 3.42E-09  |
| CCL28 | rs77024756  | 6  | 32530781  | G | A | 0.70 | -0.07 | 0.01 | 1.36E-07  |
| CCL28 | rs778641135 | 6  | 135097494 | T | C | 0.26 | 0.07  | 0.01 | 5.23E-07  |
| CCL28 | rs139141690 | 7  | 101856650 | A | G | 0.00 | -0.64 | 0.05 | 1.10E-14  |
| CCL28 | rs10984499  | 9  | 97953107  | A | G | 0.36 | 0.05  | 0.01 | 2.37E-05  |
| CCL28 | rs2519093   | 9  | 133266456 | T | C | 0.18 | -0.17 | 0.01 | 1.42E-32  |
| CCL28 | rs10886430  | 10 | 119250744 | G | A | 0.13 | -0.08 | 0.01 | 1.37E-05  |
| CCL28 | rs73000929  | 11 | 114082900 | A | G | 0.04 | -0.24 | 0.02 | 6.82E-17  |
| CCL28 | rs56990409  | 12 | 7989603   | A | G | 0.55 | 0.09  | 0.01 | 6.39E-14  |
| CCL28 | rs60822569  | 12 | 54323724  | C | T | 0.55 | 0.13  | 0.01 | 5.27E-32  |
| CCL28 | rs141421422 | 12 | 108292778 | C | A | 0.01 | -0.32 | 0.04 | 5.35E-06  |
| CCL28 | rs4965385   | 15 | 101455829 | G | A | 0.28 | -0.05 | 0.01 | 1.46E-05  |
| CCL28 | rs892090    | 19 | 55027704  | G | T | 0.83 | 0.08  | 0.01 | 1.70E-07  |
| CCL28 | rs71329093  | 21 | 35020267  | G | A | 0.06 | -0.12 | 0.02 | 5.25E-07  |
| CCL3  | rs60939770  | 3  | 46296115  | G | A | 0.32 | -0.05 | 0.01 | 6.09E-06  |
| CCL3  | rs1354034   | 3  | 56815721  | C | T | 0.60 | -0.05 | 0.01 | 1.82E-06  |
| CCL3  | rs756846124 | 4  | 38780642  | C | T | 0.18 | 0.07  | 0.01 | 3.97E-06  |
| CCL3  | rs13153461  | 5  | 139472784 | A | G | 0.74 | 0.07  | 0.01 | 9.82E-09  |
| CCL3  | rs9268644   | 6  | 32440267  | C | A | 0.55 | 0.06  | 0.01 | 2.80E-07  |
| CCL3  | rs3184504   | 12 | 111446804 | C | T | 0.52 | -0.07 | 0.01 | 4.39E-12  |
| CCL3  | rs7485656   | 12 | 124831101 | G | A | 0.14 | 0.08  | 0.01 | 9.92E-07  |
| CCL3  | rs1634486   | 17 | 36082734  | C | A | 0.22 | 0.42  | 0.01 | 4.81E-228 |
| CCL4  | rs113341849 | 3  | 46342713  | A | G | 0.12 | 0.61  | 0.01 | 2.81E-285 |
| CCL4  | rs756846124 | 4  | 38780642  | C | T | 0.18 | 0.07  | 0.01 | 1.37E-07  |
| CCL4  | rs9266806   | 6  | 31410245  | C | T | 0.20 | -0.06 | 0.01 | 2.79E-05  |
| CCL4  | rs3184504   | 12 | 111446804 | C | T | 0.52 | -0.06 | 0.01 | 4.68E-08  |
| CCL4  | rs13338037  | 16 | 81841381  | G | C | 0.14 | 0.08  | 0.01 | 8.07E-08  |
| CCL4  | -           | 17 | 36463756  | T | C | 0.12 | -0.41 | 0.01 | 5.14E-137 |
| CCL4  | rs892090    | 19 | 55027704  | G | T | 0.83 | 0.07  | 0.01 | 7.33E-07  |
| CCL5  | rs1354034   | 3  | 56815721  | C | T | 0.60 | -0.07 | 0.01 | 1.02E-09  |
| CCL5  | rs6961069   | 7  | 80589645  | T | C | 0.40 | 0.06  | 0.01 | 3.94E-08  |
| CCL5  | rs6993770   | 8  | 105569300 | T | A | 0.29 | -0.09 | 0.01 | 9.94E-14  |
| CCL5  | rs35754228  | 10 | 37914883  | T | A | 0.32 | -0.08 | 0.01 | 6.58E-10  |
| CCL5  | rs10761731  | 10 | 63267850  | T | A | 0.42 | 0.13  | 0.01 | 9.36E-29  |
| CCL5  | rs11064074  | 12 | 6171873   | T | C | 0.46 | -0.05 | 0.01 | 3.41E-06  |
| CCL5  | rs12445050  | 16 | 81837364  | T | C | 0.14 | 0.08  | 0.01 | 4.57E-07  |
| CCL5  | rs2107538   | 17 | 35880776  | T | C | 0.18 | -0.22 | 0.01 | 7.84E-53  |

|      |             |    |           |   |   |      |       |      |           |
|------|-------------|----|-----------|---|---|------|-------|------|-----------|
| CCL5 | rs1654425   | 19 | 55027612  | C | T | 0.83 | 0.13  | 0.01 | 2.72E-17  |
| CCL5 | rs3827978   | 20 | 19300647  | T | C | 0.35 | 0.06  | 0.01 | 9.11E-08  |
| CCL7 | rs12075     | 1  | 159205564 | A | G | 0.58 | -0.27 | 0.01 | 2.79E-134 |
| CCL7 | rs2228467   | 3  | 42864624  | C | T | 0.06 | 0.30  | 0.01 | 2.26E-39  |
| CCL7 | rs28380853  | 6  | 31343827  | A | T | 0.14 | 0.09  | 0.01 | 1.08E-07  |
| CCL7 | rs9907136   | 17 | 34189226  | T | C | 0.65 | 0.11  | 0.01 | 5.04E-22  |
| CCL7 | rs1654425   | 19 | 55027612  | C | T | 0.83 | 0.08  | 0.01 | 5.02E-08  |
| CCL8 | rs12075     | 1  | 159205564 | A | G | 0.58 | -0.20 | 0.01 | 3.19E-99  |
| CCL8 | rs35173808  | 6  | 31358371  | A | C | 0.10 | -0.09 | 0.01 | 3.63E-08  |
| CCL8 | rs1558067   | 7  | 30463664  | C | T | 0.44 | 0.04  | 0.01 | 5.00E-06  |
| CCL8 | rs2737245   | 8  | 115646356 | T | G | 0.28 | -0.05 | 0.01 | 6.81E-06  |
| CCL8 | rs61469632  | 9  | 132986603 | C | T | 0.06 | -0.09 | 0.01 | 8.00E-06  |
| CCL8 | rs9414801   | 10 | 63389329  | A | G | 0.53 | -0.04 | 0.01 | 1.14E-05  |
| CCL8 | rs3740688   | 11 | 47358789  | T | G | 0.54 | -0.05 | 0.01 | 1.22E-06  |
| CCL8 | rs12445050  | 16 | 81837364  | T | C | 0.14 | 0.06  | 0.01 | 1.89E-05  |
| CCL8 | rs1133763   | 17 | 34320812  | C | A | 0.15 | -1.07 | 0.01 | 0.00E+00  |
| CCL8 | rs62125968  | 19 | 3422263   | A | G | 0.23 | 0.06  | 0.01 | 5.55E-07  |
| CCL8 | rs892090    | 19 | 55027704  | G | T | 0.83 | 0.09  | 0.01 | 4.94E-13  |
| CCN1 | rs4949896   | 1  | 85596653  | T | G | 0.26 | -0.12 | 0.01 | 1.97E-20  |
| CCN1 | rs1354034   | 3  | 56815721  | C | T | 0.60 | -0.06 | 0.01 | 1.21E-06  |
| CCN1 | rs55730499  | 6  | 160584578 | T | C | 0.08 | 0.11  | 0.01 | 3.11E-08  |
| CCN1 | rs17145750  | 7  | 73612048  | T | C | 0.16 | -0.07 | 0.01 | 9.98E-06  |
| CCN1 | rs328       | 8  | 19962213  | G | C | 0.10 | -0.12 | 0.01 | 4.68E-11  |
| CCN1 | rs28601761  | 8  | 125487789 | G | C | 0.42 | -0.05 | 0.01 | 1.45E-05  |
| CCN1 | rs7848055   | 9  | 92353210  | C | A | 0.33 | -0.08 | 0.01 | 1.25E-11  |
| CCN1 | rs964184    | 11 | 116778201 | C | G | 0.87 | -0.13 | 0.01 | 2.95E-16  |
| CCN1 | rs11846959  | 14 | 94379979  | A | G | 0.25 | 0.08  | 0.01 | 1.03E-09  |
| CCN1 | rs186021206 | 17 | 7166093   | A | G | 0.01 | 0.41  | 0.05 | 1.17E-07  |
| CCN1 | rs445925    | 19 | 44912383  | A | G | 0.11 | 0.12  | 0.01 | 2.63E-12  |
| CCN2 | rs1434282   | 1  | 199041592 | T | C | 0.73 | -0.08 | 0.01 | 4.01E-09  |
| CCN2 | rs13412535  | 2  | 224010157 | A | G | 0.23 | -0.06 | 0.01 | 8.59E-06  |
| CCN2 | rs1354034   | 3  | 56815721  | C | T | 0.60 | -0.10 | 0.01 | 2.86E-17  |
| CCN2 | rs28625045  | 4  | 101851033 | A | G | 0.39 | -0.06 | 0.01 | 5.96E-07  |
| CCN2 | rs2631367   | 5  | 132369766 | G | C | 0.52 | 0.05  | 0.01 | 3.82E-06  |
| CCN2 | rs3128984   | 6  | 31456751  | G | A | 0.07 | -0.11 | 0.01 | 2.01E-06  |
| CCN2 | rs1917342   | 6  | 70640051  | G | A | 0.30 | -0.06 | 0.01 | 7.11E-06  |
| CCN2 | rs7767139   | 6  | 131971641 | G | C | 0.22 | -0.35 | 0.01 | 3.78E-145 |
| CCN2 | rs13236689  | 7  | 80606698  | G | T | 0.41 | 0.07  | 0.01 | 7.59E-09  |
| CCN2 | rs4631576   | 9  | 97942928  | T | C | 0.36 | 0.06  | 0.01 | 1.13E-06  |
| CCN2 | rs10761731  | 10 | 63267850  | T | A | 0.41 | 0.12  | 0.01 | 1.24E-26  |
| CCN2 | rs79977579  | 12 | 54300776  | A | C | 0.10 | 0.08  | 0.01 | 1.25E-05  |
| CCN2 | rs7176023   | 15 | 64808808  | C | T | 0.07 | 0.12  | 0.01 | 2.81E-07  |
| CCN2 | rs11075045  | 16 | 8940859   | G | A | 0.18 | 0.07  | 0.01 | 2.05E-06  |
| CCN2 | rs12445050  | 16 | 81837364  | T | C | 0.14 | 0.11  | 0.01 | 1.16E-11  |
| CCN2 | rs892090    | 19 | 55027704  | G | T | 0.83 | 0.15  | 0.01 | 4.10E-24  |
| CCN2 | rs6081565   | 20 | 19307260  | A | G | 0.35 | 0.07  | 0.01 | 1.61E-08  |
| CCN2 | rs56045941  | 21 | 35049034  | C | T | 0.17 | 0.07  | 0.01 | 3.27E-06  |
| CCN3 | rs2279112   | 8  | 119416784 | A | G | 0.26 | -0.27 | 0.01 | 3.94E-110 |
| CCN3 | rs7827593   | 8  | 133012217 | A | G | 0.13 | 0.08  | 0.01 | 4.31E-07  |
| CCN3 | rs11172113  | 12 | 57133500  | C | T | 0.41 | 0.05  | 0.01 | 9.07E-06  |
| CCN4 | rs2274319   | 1  | 156481081 | C | T | 0.65 | -0.05 | 0.01 | 5.01E-06  |
| CCN4 | rs68066031  | 2  | 224015781 | C | T | 0.23 | -0.10 | 0.01 | 5.32E-16  |
| CCN4 | rs1354034   | 3  | 56815721  | C | T | 0.60 | -0.08 | 0.01 | 1.32E-13  |
| CCN4 | rs1868715   | 4  | 120826815 | T | C | 0.34 | -0.05 | 0.01 | 5.07E-06  |
| CCN4 | rs114694170 | 5  | 88884379  | C | T | 0.06 | 0.13  | 0.01 | 7.07E-09  |
| CCN4 | rs139141690 | 7  | 101856650 | A | G | 0.00 | 0.37  | 0.05 | 1.34E-06  |

|       |             |    |           |   |   |      |       |      |           |
|-------|-------------|----|-----------|---|---|------|-------|------|-----------|
| CCN4  | rs4541868   | 8  | 105578477 | A | C | 0.27 | -0.06 | 0.01 | 6.57E-07  |
| CCN4  | rs12156037  | 8  | 133192215 | G | A | 0.35 | -0.44 | 0.01 | 0.00E+00  |
| CCN4  | rs150813342 | 9  | 132989126 | T | C | 0.01 | 0.28  | 0.04 | 1.57E-06  |
| CCN4  | rs774510679 | 10 | 63304076  | A | C | 0.41 | 0.07  | 0.01 | 4.85E-10  |
| CCN4  | rs11591571  | 10 | 102583047 | A | G | 0.34 | 0.06  | 0.01 | 2.08E-07  |
| CCN4  | rs562526200 | 11 | 32892843  | C | G | 0.77 | 0.07  | 0.01 | 2.92E-09  |
| CCN4  | rs10424665  | 19 | 32404725  | C | A | 0.17 | 0.07  | 0.01 | 4.67E-07  |
| CCN4  | rs1654425   | 19 | 55027612  | C | T | 0.83 | 0.08  | 0.01 | 8.77E-09  |
| CCN5  | rs4859682   | 4  | 76489165  | A | C | 0.46 | 0.05  | 0.01 | 5.81E-06  |
| CCN5  | -           | 20 | 44683866  | G | C | 0.58 | 0.20  | 0.01 | 3.74E-79  |
| CCS   | rs498045    | 11 | 66595526  | G | A | 0.53 | 0.48  | 0.01 | 0.00E+00  |
| CD109 | rs1260326   | 2  | 27508073  | C | T | 0.61 | 0.05  | 0.01 | 1.64E-07  |
| CD109 | -           | 6  | 73791270  | A | T | 0.35 | 0.85  | 0.01 | 0.00E+00  |
| CD109 | rs507666    | 9  | 133273983 | A | G | 0.18 | -0.23 | 0.01 | 8.48E-90  |
| CD109 | rs56278466  | 10 | 17833858  | G | T | 0.66 | 0.09  | 0.01 | 5.04E-25  |
| CD109 | rs186021206 | 17 | 7166093   | A | G | 0.01 | 0.56  | 0.04 | 6.40E-21  |
| CD109 | rs704       | 17 | 28367840  | A | G | 0.47 | -0.04 | 0.01 | 5.92E-06  |
| CD109 | rs868875    | 19 | 7766280   | G | A | 0.30 | -0.05 | 0.01 | 3.52E-07  |
| CD14  | rs1063412   | 1  | 172441827 | A | G | 0.56 | 0.09  | 0.01 | 7.69E-17  |
| CD14  | rs5744441   | 5  | 140637262 | A | G | 0.23 | -0.32 | 0.01 | 1.64E-125 |
| CD14  | rs28601761  | 8  | 125487789 | G | C | 0.42 | -0.07 | 0.01 | 1.95E-10  |
| CD14  | -           | 9  | 133276163 | T | A | 0.19 | -0.08 | 0.01 | 6.26E-08  |
| CD14  | rs56278466  | 10 | 17833858  | G | T | 0.66 | 0.09  | 0.01 | 3.96E-14  |
| CD14  | rs9414801   | 10 | 63389329  | A | G | 0.53 | -0.06 | 0.01 | 5.05E-08  |
| CD14  | rs149394327 | 17 | 66232877  | C | G | 0.03 | 0.17  | 0.02 | 2.68E-07  |
| CD160 | rs6699680   | 1  | 24912140  | G | A | 0.42 | -0.05 | 0.01 | 3.95E-06  |
| CD160 | rs12562475  | 1  | 121526855 | T | C | 0.10 | -0.12 | 0.01 | 7.52E-10  |
| CD160 | rs9728526   | 1  | 145718303 | A | G | 0.44 | -0.39 | 0.01 | 7.18E-265 |
| CD160 | rs2009581   | 2  | 111050100 | A | G | 0.27 | -0.16 | 0.01 | 2.98E-39  |
| CD160 | rs186535521 | 2  | 196926710 | T | C | 0.02 | -0.28 | 0.03 | 8.24E-10  |
| CD160 | rs13081778  | 3  | 46912231  | G | A | 0.37 | -0.05 | 0.01 | 1.11E-05  |
| CD160 | rs777572865 | 5  | 132485950 | C | A | 0.33 | -0.07 | 0.01 | 3.16E-09  |
| CD160 | rs2523609   | 6  | 31269478  | A | G | 0.61 | 0.11  | 0.01 | 1.59E-22  |
| CD160 | rs7077401   | 10 | 5983915   | G | A | 0.44 | -0.06 | 0.01 | 2.62E-07  |
| CD160 | rs2497318   | 10 | 92672243  | T | C | 0.45 | 0.09  | 0.01 | 1.07E-17  |
| CD160 | rs3016275   | 11 | 128197509 | T | C | 0.34 | -0.09 | 0.01 | 1.23E-14  |
| CD160 | rs3184504   | 12 | 111446804 | C | T | 0.52 | -0.14 | 0.01 | 7.35E-40  |
| CD160 | rs77924615  | 16 | 20381010  | A | G | 0.20 | -0.06 | 0.01 | 1.78E-05  |
| CD160 | rs58745116  | 17 | 35476573  | A | G | 0.39 | -0.07 | 0.01 | 2.19E-10  |
| CD160 | rs516316    | 19 | 48702888  | C | G | 0.51 | -0.07 | 0.01 | 8.11E-10  |
| CD163 | rs2099684   | 1  | 161530340 | G | A | 0.32 | 0.06  | 0.01 | 1.24E-06  |
| CD163 | rs62165726  | 2  | 134208991 | A | C | 0.04 | -0.68 | 0.02 | 9.12E-123 |
| CD163 | -           | 2  | 202612713 | T | A | 0.37 | 0.06  | 0.01 | 2.75E-06  |
| CD163 | rs11923060  | 3  | 186871601 | T | C | 0.16 | -0.08 | 0.01 | 1.79E-07  |
| CD163 | rs1800759   | 4  | 99144358  | G | T | 0.61 | -0.05 | 0.01 | 6.71E-06  |
| CD163 | rs115216147 | 5  | 71369699  | A | T | 0.07 | 0.17  | 0.01 | 1.88E-14  |
| CD163 | rs11381821  | 6  | 109320671 | A | C | 0.47 | -0.05 | 0.01 | 9.73E-07  |
| CD163 | rs2288081   | 7  | 130672456 | C | T | 0.85 | 0.07  | 0.01 | 2.11E-05  |
| CD163 | rs10267707  | 7  | 150813885 | G | C | 0.45 | 0.05  | 0.01 | 6.42E-06  |
| CD163 | rs4876611   | 8  | 115659621 | G | A | 0.72 | 0.06  | 0.01 | 4.72E-06  |
| CD163 | rs2031902   | 9  | 33117526  | T | C | 0.59 | -0.09 | 0.01 | 1.98E-15  |
| CD163 | rs635634    | 9  | 133279427 | T | C | 0.18 | 0.09  | 0.01 | 1.15E-10  |
| CD163 | -           | 9  | 137074738 | C | T | 0.63 | -0.05 | 0.01 | 1.62E-06  |
| CD163 | rs768890137 | 11 | 47386310  | C | T | 0.39 | 0.07  | 0.01 | 6.89E-09  |
| CD163 | rs11220505  | 11 | 126464910 | T | C | 0.22 | 0.13  | 0.01 | 2.87E-23  |
| CD163 | rs74622686  | 11 | 134394333 | G | A | 0.15 | 0.07  | 0.01 | 1.01E-05  |



|         |             |    |           |   |   |      |       |      |           |
|---------|-------------|----|-----------|---|---|------|-------|------|-----------|
| CD163   | rs11054859  | 12 | 7617180   | A | G | 0.10 | -0.18 | 0.01 | 2.12E-25  |
| CD163   | rs10774625  | 12 | 111472415 | G | A | 0.50 | -0.08 | 0.01 | 5.54E-13  |
| CD163   | rs217184    | 16 | 72072066  | C | T | 0.20 | -0.08 | 0.01 | 3.22E-09  |
| CD163   | rs186021206 | 17 | 7166093   | A | G | 0.01 | 1.79  | 0.05 | 8.43E-130 |
| CD163   | rs601338    | 19 | 48703417  | A | G | 0.51 | 0.06  | 0.01 | 3.87E-07  |
| CD163   | rs7246479   | 19 | 55312964  | G | T | 0.51 | 0.05  | 0.01 | 2.74E-05  |
| CD164   | rs4950771   | 1  | 202142651 | G | T | 0.93 | -0.17 | 0.01 | 3.11E-13  |
| CD164   | rs45492299  | 1  | 225866633 | A | G | 0.18 | -0.07 | 0.01 | 1.61E-06  |
| CD164   | rs9857570   | 3  | 58294963  | G | A | 0.32 | -0.09 | 0.01 | 6.48E-14  |
| CD164   | rs6929023   | 6  | 109399147 | A | G | 0.33 | -0.15 | 0.01 | 4.59E-36  |
| CD164   | rs1692821   | 8  | 11842479  | T | C | 0.28 | -0.06 | 0.01 | 1.76E-05  |
| CD164   | rs4734879   | 8  | 105570896 | G | A | 0.27 | -0.06 | 0.01 | 7.21E-06  |
| CD164   | rs10820606  | 9  | 96430637  | C | A | 0.23 | -0.07 | 0.01 | 2.66E-07  |
| CD164   | rs10740118  | 10 | 63341447  | C | G | 0.41 | 0.07  | 0.01 | 1.14E-08  |
| CD164   | rs72701845  | 14 | 92750678  | A | G | 0.04 | -0.20 | 0.02 | 1.53E-10  |
| CD164   | rs892090    | 19 | 55027704  | G | T | 0.83 | 0.09  | 0.01 | 1.82E-09  |
| CD177   | rs6796      | 7  | 6462736   | C | T | 0.28 | 0.04  | 0.01 | 1.95E-05  |
| CD177   | rs186021206 | 17 | 7166093   | A | G | 0.01 | 0.28  | 0.04 | 8.56E-06  |
| CD177   | rs78530667  | 19 | 43396545  | C | T | 0.13 | -0.73 | 0.01 | 0.00E+00  |
| CD1C    | rs61788913  | 1  | 59625496  | T | G | 0.13 | -0.10 | 0.01 | 2.01E-09  |
| CD1C    | rs115248892 | 1  | 158292829 | T | G | 0.00 | -1.62 | 0.07 | 4.51E-54  |
| CD1C    | rs4384720   | 2  | 144667834 | G | C | 0.92 | 0.11  | 0.01 | 1.66E-07  |
| CD1C    | rs10189685  | 2  | 202623726 | A | G | 0.30 | -0.06 | 0.01 | 4.63E-06  |
| CD1C    | rs4698932   | 4  | 105127990 | A | G | 0.49 | 0.05  | 0.01 | 3.46E-06  |
| CD1C    | rs9265969   | 6  | 31347929  | A | G | 0.16 | 0.23  | 0.01 | 3.96E-53  |
| CD1C    | rs11963621  | 6  | 44623269  | C | T | 0.10 | 0.12  | 0.01 | 7.65E-11  |
| CD1C    | rs1847472   | 6  | 90263440  | A | C | 0.35 | -0.10 | 0.01 | 7.68E-17  |
| CD1C    | rs3808460   | 8  | 115585408 | C | T | 0.56 | -0.05 | 0.01 | 9.11E-06  |
| CD1C    | rs139130389 | 11 | 72139110  | A | C | 0.07 | -0.42 | 0.01 | 1.59E-90  |
| CD1C    | rs572608    | 11 | 118930931 | T | A | 0.55 | 0.06  | 0.01 | 2.17E-08  |
| CD1C    | rs3937026   | 11 | 122655058 | T | G | 0.25 | 0.07  | 0.01 | 1.25E-07  |
| CD1C    | rs150926693 | 12 | 54232988  | T | C | 0.10 | 0.08  | 0.01 | 1.14E-05  |
| CD1C    | rs653178    | 12 | 111569952 | T | C | 0.52 | -0.11 | 0.01 | 7.08E-23  |
| CD1C    | rs76428106  | 13 | 28029870  | C | T | 0.01 | 0.36  | 0.03 | 2.80E-13  |
| CD1C    | rs12599288  | 16 | 11728210  | C | T | 0.30 | -0.11 | 0.01 | 2.63E-21  |
| CD1C    | rs60969446  | 19 | 33268667  | C | T | 0.57 | -0.06 | 0.01 | 3.37E-07  |
| CD1C    | rs17272847  | 19 | 49476141  | A | G | 0.09 | 0.09  | 0.01 | 3.23E-06  |
| CD1C    | rs6063502   | 20 | 50339058  | G | A | 0.35 | 0.07  | 0.01 | 1.34E-08  |
| CD200   | -           | 2  | 27526125  | A | T | 0.62 | 0.06  | 0.01 | 1.85E-07  |
| CD200   | rs6775517   | 3  | 58373240  | T | G | 0.37 | 0.07  | 0.01 | 1.92E-08  |
| CD200   | rs13318932  | 3  | 98677506  | T | C | 0.10 | 0.08  | 0.01 | 1.14E-05  |
| CD200   | rs2399420   | 3  | 112350918 | A | C | 0.90 | 0.27  | 0.01 | 1.47E-47  |
| CD200   | rs8176747   | 9  | 133255928 | G | C | 0.06 | 0.29  | 0.01 | 3.18E-36  |
| CD200   | rs56278466  | 10 | 17833858  | G | T | 0.66 | 0.10  | 0.01 | 4.26E-17  |
| CD200   | rs36060036  | 16 | 20350628  | T | C | 0.17 | -0.07 | 0.01 | 5.65E-06  |
| CD200   | rs186021206 | 17 | 7166093   | A | G | 0.01 | 0.35  | 0.05 | 6.75E-06  |
| CD200   | rs7286917   | 22 | 39464863  | G | A | 0.74 | -0.09 | 0.01 | 6.57E-12  |
| CD200R1 | rs6545928   | 2  | 62364985  | C | T | 0.23 | -0.05 | 0.01 | 1.09E-06  |
| CD200R1 | rs10935473  | 3  | 98698056  | T | G | 0.44 | -0.32 | 0.01 | 2.56E-167 |
| CD200R1 | rs16860233  | 3  | 112923275 | T | C | 0.04 | 1.81  | 0.02 | 0.00E+00  |
| CD200R1 | rs3129782   | 6  | 32680942  | A | G | 0.68 | -0.08 | 0.01 | 9.55E-15  |
| CD200R1 | rs544503442 | 8  | 104960318 | A | G | 0.14 | 0.07  | 0.01 | 1.09E-06  |
| CD200R1 | -           | 9  | 133263362 | G | A | 0.18 | -0.23 | 0.01 | 2.87E-86  |
| CD200R1 | rs10823374  | 10 | 69441960  | G | A | 0.44 | 0.06  | 0.01 | 2.56E-10  |
| CD200R1 | rs2233243   | 11 | 60385009  | G | A | 0.29 | 0.05  | 0.01 | 1.37E-06  |
| CD200R1 | rs75071241  | 11 | 126362291 | A | G | 0.06 | -0.11 | 0.01 | 2.46E-09  |

|         |             |    |           |   |   |      |       |      |           |
|---------|-------------|----|-----------|---|---|------|-------|------|-----------|
| CD200R1 | rs10774625  | 12 | 111472415 | G | A | 0.50 | -0.05 | 0.01 | 1.02E-09  |
| CD200R1 | rs186021206 | 17 | 7166093   | A | G | 0.01 | 0.91  | 0.04 | 3.82E-50  |
| CD207   | -           | 1  | 212776703 | T | C | 0.13 | -0.08 | 0.01 | 1.11E-06  |
| CD207   | rs35533397  | 2  | 12560731  | T | C | 0.23 | 0.10  | 0.01 | 4.50E-12  |
| CD207   | rs17718987  | 2  | 70833805  | C | G | 0.32 | 0.47  | 0.01 | 0.00E+00  |
| CD207   | -           | 2  | 202690981 | C | T | 0.30 | -0.07 | 0.01 | 6.81E-08  |
| CD207   | rs7432658   | 3  | 185330526 | C | T | 0.79 | -0.07 | 0.01 | 1.36E-07  |
| CD207   | rs3135394   | 6  | 32440720  | G | A | 0.13 | -0.18 | 0.01 | 4.68E-31  |
| CD207   | rs62408218  | 6  | 90222139  | T | C | 0.36 | -0.10 | 0.01 | 3.56E-21  |
| CD207   | rs2021033   | 6  | 167110751 | A | G | 0.49 | -0.05 | 0.01 | 1.32E-05  |
| CD207   | rs989437    | 7  | 28790881  | G | A | 0.62 | 0.08  | 0.01 | 1.91E-12  |
| CD207   | rs13275142  | 8  | 115590647 | A | G | 0.57 | -0.08 | 0.01 | 8.50E-15  |
| CD207   | -           | 9  | 133274293 | A | C | 0.18 | -0.08 | 0.01 | 4.52E-09  |
| CD207   | rs17450261  | 10 | 89055738  | C | T | 0.20 | 0.06  | 0.01 | 5.74E-06  |
| CD207   | rs79755767  | 12 | 54304624  | A | G | 0.10 | 0.08  | 0.01 | 1.31E-05  |
| CD207   | rs647881    | 12 | 120872224 | G | A | 0.49 | -0.12 | 0.01 | 3.62E-34  |
| CD207   | rs34593439  | 15 | 78942615  | A | G | 0.11 | -0.09 | 0.01 | 2.27E-07  |
| CD207   | rs4985556   | 16 | 70660097  | A | C | 0.12 | -0.08 | 0.01 | 2.69E-07  |
| CD207   | rs2139493   | 16 | 85988018  | C | T | 0.27 | -0.05 | 0.01 | 2.12E-05  |
| CD207   | rs7247412   | 19 | 51810615  | C | T | 0.27 | -0.06 | 0.01 | 4.82E-08  |
| CD209   | rs12740374  | 1  | 109274968 | T | G | 0.22 | -0.10 | 0.01 | 1.25E-21  |
| CD209   | rs288257    | 2  | 182738765 | T | C | 0.62 | -0.04 | 0.01 | 6.86E-06  |
| CD209   | rs505922    | 9  | 133273813 | C | T | 0.32 | 0.82  | 0.01 | 0.00E+00  |
| CD209   | rs10769256  | 11 | 47356845  | T | C | 0.40 | 0.05  | 0.01 | 3.51E-09  |
| CD209   | rs10860738  | 12 | 101474219 | A | G | 0.67 | 0.04  | 0.01 | 9.91E-06  |
| CD209   | rs183130    | 16 | 56957451  | T | C | 0.32 | 0.04  | 0.01 | 5.80E-06  |
| CD209   | rs77542162  | 17 | 69085137  | G | A | 0.02 | 0.15  | 0.02 | 4.78E-07  |
| CD209   | rs4804774   | 19 | 7707287   | C | G | 0.24 | -0.41 | 0.01 | 1.20E-283 |
| CD22    | rs4848370   | 2  | 111054088 | T | C | 0.27 | -0.07 | 0.01 | 3.30E-09  |
| CD22    | rs967367    | 3  | 187016678 | A | G | 0.39 | -0.12 | 0.01 | 1.00E-26  |
| CD22    | rs304154    | 5  | 88824599  | C | T | 0.31 | 0.05  | 0.01 | 5.01E-06  |
| CD22    | rs112824187 | 5  | 158838300 | A | G | 0.08 | -0.13 | 0.01 | 4.66E-10  |
| CD22    | rs9271065   | 6  | 32607842  | G | C | 0.85 | -0.25 | 0.01 | 3.41E-60  |
| CD22    | rs116968179 | 7  | 50149587  | A | G | 0.03 | -0.13 | 0.02 | 1.97E-05  |
| CD22    | -           | 8  | 129609309 | A | T | 0.27 | -0.06 | 0.01 | 2.24E-06  |
| CD22    | rs12554596  | 9  | 37002145  | G | A | 0.20 | -0.07 | 0.01 | 8.98E-07  |
| CD22    | -           | 9  | 133263362 | G | A | 0.18 | 0.07  | 0.01 | 1.02E-07  |
| CD22    | -           | 10 | 61976858  | C | T | 0.65 | -0.07 | 0.01 | 3.37E-10  |
| CD22    | rs12784975  | 10 | 96620380  | C | T | 0.19 | -0.07 | 0.01 | 1.63E-06  |
| CD22    | rs11223794  | 11 | 134417502 | T | C | 0.16 | 0.06  | 0.01 | 2.73E-05  |
| CD22    | rs111338191 | 12 | 111388673 | T | A | 0.52 | -0.05 | 0.01 | 2.20E-06  |
| CD22    | rs3213566   | 12 | 120784775 | C | T | 0.53 | -0.05 | 0.01 | 1.12E-05  |
| CD22    | rs76428106  | 13 | 28029870  | C | T | 0.01 | 0.22  | 0.03 | 1.03E-05  |
| CD22    | rs374039502 | 13 | 108308037 | A | T | 0.02 | 0.33  | 0.03 | 6.43E-17  |
| CD22    | rs9939427   | 16 | 85982485  | A | G | 0.23 | 0.07  | 0.01 | 1.45E-08  |
| CD22    | rs186021206 | 17 | 7166093   | A | G | 0.01 | 1.01  | 0.05 | 7.47E-44  |
| CD22    | rs34557412  | 17 | 16948873  | G | A | 0.01 | 0.73  | 0.04 | 2.51E-29  |
| CD22    | rs35222145  | 17 | 39851068  | G | T | 0.49 | -0.05 | 0.01 | 7.52E-07  |
| CD22    | rs10411704  | 19 | 35309759  | T | G | 0.79 | -0.29 | 0.01 | 6.92E-113 |
| CD22    | rs492602    | 19 | 48703160  | G | A | 0.51 | 0.06  | 0.01 | 8.31E-08  |
| CD22    | rs6065926   | 20 | 46107215  | G | A | 0.75 | -0.07 | 0.01 | 3.04E-08  |
| CD22    | rs73167342  | 22 | 39438097  | G | C | 0.74 | -0.06 | 0.01 | 7.89E-07  |
| CD22    | rs73165110  | 22 | 41895852  | A | G | 0.08 | -0.13 | 0.01 | 1.11E-10  |
| CD244   | rs37456     | 1  | 43827317  | T | C | 0.35 | 0.07  | 0.01 | 7.97E-09  |
| CD244   | rs115868021 | 1  | 160841584 | G | C | 0.01 | -2.17 | 0.05 | 1.44E-189 |
| CD244   | rs12616639  | 2  | 62302790  | G | A | 0.61 | 0.11  | 0.01 | 2.08E-21  |

|        |             |    |           |   |   |      |       |      |           |
|--------|-------------|----|-----------|---|---|------|-------|------|-----------|
| CD244  | rs2009581   | 2  | 111050100 | A | G | 0.27 | -0.09 | 0.01 | 3.21E-12  |
| CD244  | -           | 2  | 134248686 | A | G | 0.78 | -0.06 | 0.01 | 1.32E-05  |
| CD244  | rs34458031  | 3  | 99033191  | A | G | 0.09 | 0.08  | 0.01 | 2.46E-05  |
| CD244  | rs6993770   | 8  | 105569300 | T | A | 0.29 | 0.08  | 0.01 | 3.81E-10  |
| CD244  | rs10815098  | 9  | 4865338   | T | C | 0.21 | 0.07  | 0.01 | 4.60E-08  |
| CD244  | rs113315674 | 9  | 97957771  | A | G | 0.37 | 0.08  | 0.01 | 6.10E-13  |
| CD244  | rs774510679 | 10 | 63304076  | A | C | 0.41 | 0.06  | 0.01 | 1.72E-07  |
| CD244  | rs12574844  | 11 | 126403491 | A | G | 0.07 | -0.13 | 0.01 | 3.18E-09  |
| CD244  | rs79977579  | 12 | 54300776  | A | C | 0.10 | 0.12  | 0.01 | 5.21E-11  |
| CD244  | rs3184504   | 12 | 111446804 | C | T | 0.52 | -0.15 | 0.01 | 1.79E-44  |
| CD244  | rs10146962  | 14 | 100704203 | C | T | 0.34 | -0.06 | 0.01 | 2.93E-06  |
| CD244  | rs186021206 | 17 | 7166093   | A | G | 0.01 | 1.30  | 0.05 | 6.84E-68  |
| CD244  | rs2659005   | 17 | 81244914  | T | C | 0.44 | 0.09  | 0.01 | 2.99E-15  |
| CD27   | rs150816167 | 1  | 179602727 | C | T | 0.04 | 0.14  | 0.02 | 1.04E-06  |
| CD27   | rs3998176   | 6  | 32646350  | G | C | 0.22 | 0.06  | 0.01 | 2.04E-05  |
| CD27   | rs4722557   | 7  | 25979936  | A | G | 0.26 | -0.06 | 0.01 | 1.50E-06  |
| CD27   | rs25680     | 12 | 6445462   | A | G | 0.24 | 0.29  | 0.01 | 1.95E-109 |
| CD27   | rs3184504   | 12 | 111446804 | C | T | 0.52 | -0.07 | 0.01 | 1.67E-10  |
| CD27   | rs150861794 | 13 | 108351457 | T | C | 0.02 | 0.22  | 0.03 | 1.37E-06  |
| CD27   | rs34562254  | 17 | 16939677  | A | G | 0.10 | 0.10  | 0.01 | 4.88E-08  |
| CD274  | rs1801274   | 1  | 161509955 | G | A | 0.53 | 0.06  | 0.01 | 5.21E-08  |
| CD274  | rs78444298  | 1  | 184702964 | A | G | 0.02 | 0.20  | 0.03 | 6.18E-07  |
| CD274  | rs1354034   | 3  | 56815721  | C | T | 0.60 | 0.05  | 0.01 | 9.31E-06  |
| CD274  | rs6993770   | 8  | 105569300 | T | A | 0.29 | -0.06 | 0.01 | 7.40E-07  |
| CD274  | rs822340    | 9  | 5453260   | G | A | 0.75 | 0.34  | 0.01 | 7.85E-154 |
| CD274  | rs111338191 | 12 | 111388673 | T | A | 0.52 | -0.08 | 0.01 | 1.52E-13  |
| CD274  | rs112635299 | 14 | 94371805  | T | G | 0.02 | 0.22  | 0.02 | 7.88E-09  |
| CD274  | rs8178824   | 17 | 66228657  | T | C | 0.03 | 0.15  | 0.02 | 5.79E-06  |
| CD276  | rs4665972   | 2  | 27375230  | C | T | 0.61 | 0.06  | 0.01 | 8.77E-09  |
| CD276  | rs10740131  | 10 | 63511728  | T | A | 0.47 | 0.04  | 0.01 | 9.89E-06  |
| CD276  | rs1042704   | 14 | 22843385  | A | G | 0.22 | 0.06  | 0.01 | 6.46E-07  |
| CD276  | rs2239651   | 14 | 94382210  | C | T | 0.27 | -0.07 | 0.01 | 6.01E-11  |
| CD276  | rs2291014   | 15 | 73704018  | A | G | 0.10 | -1.32 | 0.01 | 0.00E+00  |
| CD276  | rs200489612 | 17 | 7203059   | A | G | 0.01 | 0.44  | 0.04 | 1.78E-10  |
| CD276  | rs62217923  | 21 | 41167366  | G | C | 0.26 | 0.07  | 0.01 | 3.92E-12  |
| CD28   | -           | 1  | 43812246  | G | A | 0.29 | 0.12  | 0.01 | 1.59E-20  |
| CD28   | rs7369876   | 2  | 203771749 | T | C | 0.83 | 0.26  | 0.01 | 2.60E-65  |
| CD28   | rs9838308   | 3  | 170033504 | C | T | 0.37 | -0.12 | 0.01 | 1.81E-22  |
| CD28   | rs17612562  | 6  | 32647669  | G | T | 0.33 | -0.06 | 0.01 | 2.38E-05  |
| CD28   | rs6796      | 7  | 6462736   | C | T | 0.28 | 0.06  | 0.01 | 2.72E-06  |
| CD28   | rs80318131  | 7  | 129143002 | C | T | 0.31 | 0.11  | 0.01 | 2.41E-17  |
| CD28   | rs1461729   | 8  | 9329732   | G | A | 0.90 | -0.09 | 0.01 | 1.25E-06  |
| CD28   | rs34357864  | 9  | 133270497 | A | G | 0.32 | 0.08  | 0.01 | 2.94E-10  |
| CD28   | rs2868996   | 11 | 47553818  | T | A | 0.34 | -0.06 | 0.01 | 1.72E-06  |
| CD28   | rs78689694  | 11 | 126364925 | C | G | 0.13 | -0.10 | 0.01 | 6.25E-09  |
| CD28   | rs35350651  | 12 | 111469627 | C | A | 0.50 | -0.09 | 0.01 | 1.67E-16  |
| CD28   | rs71126747  | 14 | 65443409  | A | C | 0.67 | -0.06 | 0.01 | 1.15E-06  |
| CD28   | rs7161799   | 15 | 58478324  | T | C | 0.08 | 0.13  | 0.01 | 1.17E-09  |
| CD28   | rs186021206 | 17 | 7166093   | A | G | 0.01 | 1.36  | 0.05 | 1.92E-68  |
| CD28   | rs2725405   | 17 | 81246424  | C | G | 0.44 | 0.06  | 0.01 | 3.40E-08  |
| CD2AP  | rs1354034   | 3  | 56815721  | C | T | 0.60 | 0.06  | 0.01 | 1.49E-08  |
| CD2AP  | -           | 6  | 47469961  | A | C | 0.28 | 0.30  | 0.01 | 3.37E-133 |
| CD300C | rs61747728  | 1  | 179557079 | T | C | 0.04 | 0.12  | 0.02 | 2.10E-05  |
| CD300C | rs11888817  | 2  | 62303845  | C | T | 0.64 | 0.12  | 0.01 | 3.65E-27  |
| CD300C | rs79935131  | 3  | 98779723  | T | G | 0.09 | 0.14  | 0.01 | 1.59E-13  |
| CD300C | rs13107325  | 4  | 102267552 | T | C | 0.08 | 0.14  | 0.01 | 2.52E-12  |

|         |             |    |           |   |   |      |       |      |           |
|---------|-------------|----|-----------|---|---|------|-------|------|-----------|
| CD300C  | rs509227    | 6  | 10535358  | C | A | 0.52 | 0.06  | 0.01 | 7.57E-10  |
| CD300C  | rs17843693  | 6  | 32654345  | A | G | 0.37 | 0.06  | 0.01 | 1.08E-05  |
| CD300C  | rs4413619   | 6  | 95635103  | C | T | 0.89 | -0.08 | 0.01 | 1.08E-05  |
| CD300C  | rs143110592 | 7  | 7196500   | T | A | 0.19 | -0.06 | 0.01 | 5.58E-06  |
| CD300C  | rs635634    | 9  | 133279427 | T | C | 0.18 | 0.06  | 0.01 | 2.57E-05  |
| CD300C  | rs950802    | 11 | 60385111  | A | G | 0.31 | 0.05  | 0.01 | 2.29E-05  |
| CD300C  | rs181897168 | 11 | 126357200 | A | G | 0.01 | 0.26  | 0.04 | 4.09E-06  |
| CD300C  | rs774868556 | 12 | 89431449  | A | A | 0.31 | -0.35 | 0.01 | 7.67E-186 |
| CD300C  | rs35350651  | 12 | 111469627 | C | A | 0.50 | -0.07 | 0.01 | 2.22E-11  |
| CD300C  | -           | 12 | 120912293 | G | T | 0.48 | -0.05 | 0.01 | 1.21E-05  |
| CD300C  | rs186021206 | 17 | 7166093   | A | G | 0.01 | 1.06  | 0.05 | 6.27E-46  |
| CD300C  | rs58440339  | 17 | 74543335  | T | C | 0.09 | 0.68  | 0.01 | 3.03E-289 |
| CD300C  | rs2659005   | 17 | 81244914  | T | C | 0.44 | 0.06  | 0.01 | 2.14E-07  |
| CD300E  | rs748544288 | 1  | 150635844 | C | G | 0.23 | -0.06 | 0.01 | 5.14E-07  |
| CD300E  | rs13164856  | 5  | 132477512 | C | T | 0.29 | -0.05 | 0.01 | 1.48E-05  |
| CD300E  | rs532143340 | 6  | 32522301  | G | C | 0.66 | 0.07  | 0.01 | 3.43E-08  |
| CD300E  | rs3778752   | 7  | 128939993 | T | G | 0.46 | 0.08  | 0.01 | 3.14E-14  |
| CD300E  | rs3184504   | 12 | 111446804 | C | T | 0.52 | -0.09 | 0.01 | 2.45E-19  |
| CD300E  | rs76428106  | 13 | 28029870  | C | T | 0.01 | 0.29  | 0.03 | 3.64E-09  |
| CD300E  | rs1987102   | 15 | 79973546  | C | T | 0.26 | -0.06 | 0.01 | 4.17E-07  |
| CD300E  | rs77924615  | 16 | 20381010  | A | G | 0.20 | -0.06 | 0.01 | 1.75E-05  |
| CD300E  | rs424971    | 16 | 85912844  | C | T | 0.44 | -0.05 | 0.01 | 3.42E-06  |
| CD300E  | rs6503533   | 17 | 40028327  | T | C | 0.62 | -0.05 | 0.01 | 1.11E-05  |
| CD300E  | rs1719465   | 17 | 74580252  | C | T | 0.69 | -0.36 | 0.01 | 2.91E-209 |
| CD300E  | rs4760      | 19 | 43648948  | G | A | 0.16 | 0.13  | 0.01 | 7.05E-21  |
| CD300LF | rs61747728  | 1  | 179557079 | T | C | 0.04 | 0.09  | 0.01 | 2.79E-05  |
| CD300LF | rs2256974   | 6  | 31587615  | A | C | 0.17 | 0.05  | 0.01 | 2.27E-05  |
| CD300LF | rs149110519 | 6  | 144064640 | T | C | 0.04 | 0.09  | 0.01 | 1.95E-05  |
| CD300LF | rs12667978  | 7  | 129137407 | T | C | 0.57 | -0.04 | 0.01 | 4.72E-07  |
| CD300LF | rs909098    | 11 | 308716    | T | C | 0.06 | -0.08 | 0.01 | 4.39E-07  |
| CD300LF | rs3184504   | 12 | 111446804 | C | T | 0.52 | -0.06 | 0.01 | 1.96E-15  |
| CD300LF | rs28640218  | 16 | 20347945  | T | G | 0.19 | -0.05 | 0.01 | 6.73E-07  |
| CD300LF | rs2241244   | 17 | 39997301  | C | G | 0.54 | -0.06 | 0.01 | 2.35E-07  |
| CD300LF | rs35489971  | 17 | 74704804  | G | A | 0.81 | 1.29  | 0.01 | 0.00E+00  |
| CD300LG | rs61747728  | 1  | 179557079 | T | C | 0.04 | 0.15  | 0.02 | 1.55E-07  |
| CD300LG | rs78058190  | 2  | 218835276 | A | G | 0.05 | -0.13 | 0.02 | 9.45E-07  |
| CD300LG | rs1801282   | 3  | 12351626  | G | C | 0.12 | 0.08  | 0.01 | 2.42E-07  |
| CD300LG | rs13127398  | 4  | 102000547 | A | T | 0.07 | 0.10  | 0.01 | 3.54E-06  |
| CD300LG | rs11967262  | 6  | 43792590  | G | C | 0.49 | -0.08 | 0.01 | 7.42E-16  |
| CD300LG | rs28588745  | 8  | 10789534  | T | A | 0.21 | -0.10 | 0.01 | 1.03E-15  |
| CD300LG | rs8176741   | 9  | 133256074 | A | G | 0.06 | 0.23  | 0.01 | 2.32E-25  |
| CD300LG | rs2068888   | 10 | 93079885  | A | G | 0.45 | 0.05  | 0.01 | 2.20E-06  |
| CD300LG | rs71468663  | 11 | 64250632  | C | A | 0.05 | -0.13 | 0.02 | 1.59E-07  |
| CD300LG | rs1716403   | 12 | 124035299 | C | T | 0.68 | -0.05 | 0.01 | 2.69E-06  |
| CD300LG | rs174418    | 15 | 58395404  | C | T | 0.60 | -0.06 | 0.01 | 2.92E-07  |
| CD300LG | rs777834943 | 16 | 20355409  | T | C | 0.18 | -0.07 | 0.01 | 5.62E-07  |
| CD300LG | rs12446515  | 16 | 56953103  | T | C | 0.32 | 0.06  | 0.01 | 9.46E-08  |
| CD300LG | rs72836561  | 17 | 43848758  | T | C | 0.03 | -1.07 | 0.02 | 2.57E-271 |
| CD302   | rs2556106   | 2  | 159798013 | T | G | 0.87 | -0.42 | 0.01 | 1.60E-148 |
| CD302   | rs10073754  | 5  | 179879517 | G | A | 0.12 | 0.10  | 0.01 | 1.33E-09  |
| CD302   | rs9260603   | 6  | 29954977  | T | C | 0.44 | -0.10 | 0.01 | 4.90E-19  |
| CD302   | rs782134971 | 9  | 133264504 | G | C | 0.25 | -0.07 | 0.01 | 2.10E-09  |
| CD302   | rs7310409   | 12 | 120987058 | G | A | 0.62 | -0.07 | 0.01 | 1.28E-09  |
| CD302   | rs9302635   | 16 | 72110275  | C | T | 0.18 | -0.06 | 0.01 | 5.92E-06  |
| CD302   | rs8178824   | 17 | 66228657  | T | C | 0.03 | 0.30  | 0.02 | 1.31E-21  |
| CD302   | rs11662351  | 18 | 32230496  | C | T | 0.39 | 0.16  | 0.01 | 3.66E-49  |

|        |             |    |           |   |   |      |       |      |           |
|--------|-------------|----|-----------|---|---|------|-------|------|-----------|
| CD33   | rs62165726  | 2  | 134208991 | A | C | 0.04 | -0.10 | 0.01 | 6.55E-11  |
| CD33   | rs56094988  | 3  | 98771605  | C | G | 0.09 | 0.07  | 0.01 | 3.16E-12  |
| CD33   | rs7865362   | 9  | 33117967  | T | C | 0.36 | 0.03  | 0.00 | 2.82E-06  |
| CD33   | rs10823374  | 10 | 69441960  | G | A | 0.44 | 0.05  | 0.00 | 8.48E-17  |
| CD33   | rs139130389 | 11 | 72139110  | A | C | 0.07 | -0.05 | 0.01 | 6.31E-06  |
| CD33   | rs74612335  | 11 | 126368738 | C | T | 0.13 | -0.04 | 0.01 | 5.25E-06  |
| CD33   | rs186021206 | 17 | 7166093   | A | G | 0.01 | 0.63  | 0.03 | 9.06E-58  |
| CD33   | rs2455069   | 19 | 51225385  | G | A | 0.43 | 1.17  | 0.01 | 0.00E+00  |
| CD34   | rs376752045 | 1  | 207900028 | C | T | 0.00 | -1.04 | 0.13 | 1.48E-07  |
| CD34   | rs532436    | 9  | 133274414 | A | G | 0.19 | -0.46 | 0.01 | 2.38E-216 |
| CD34   | rs35166255  | 11 | 126431861 | A | G | 0.03 | 0.21  | 0.02 | 7.06E-12  |
| CD34   | rs186021206 | 17 | 7166093   | A | G | 0.01 | 0.73  | 0.05 | 8.57E-22  |
| CD38   | rs28703311  | 4  | 15774228  | A | G | 0.22 | -0.43 | 0.01 | 0.00E+00  |
| CD38   | rs7137828   | 12 | 111494996 | T | C | 0.52 | -0.06 | 0.01 | 2.78E-10  |
| CD4    | rs147599819 | 6  | 32627039  | T | G | 0.40 | -0.12 | 0.01 | 1.31E-24  |
| CD4    | rs964184    | 11 | 116778201 | C | G | 0.87 | -0.10 | 0.01 | 1.08E-09  |
| CD4    | rs73053728  | 12 | 6787380   | G | A | 0.30 | -0.36 | 0.01 | 1.21E-193 |
| CD4    | rs3184504   | 12 | 111446804 | C | T | 0.52 | -0.09 | 0.01 | 6.39E-16  |
| CD4    | rs72654473  | 19 | 44911142  | A | C | 0.11 | 0.10  | 0.01 | 1.62E-08  |
| CD40   | rs1354034   | 3  | 56815721  | C | T | 0.60 | 0.09  | 0.01 | 1.69E-15  |
| CD40   | rs342293    | 7  | 106731773 | G | C | 0.46 | -0.07 | 0.01 | 5.63E-09  |
| CD40   | rs6993770   | 8  | 105569300 | T | A | 0.29 | -0.07 | 0.01 | 4.18E-09  |
| CD40   | rs7896518   | 10 | 63344740  | G | A | 0.42 | 0.07  | 0.01 | 6.87E-11  |
| CD40   | rs73396521  | 11 | 267568    | A | G | 0.25 | 0.06  | 0.01 | 8.99E-06  |
| CD40   | rs4608137   | 12 | 6184207   | A | G | 0.49 | -0.05 | 0.01 | 2.18E-06  |
| CD40   | rs3184504   | 12 | 111446804 | C | T | 0.52 | -0.05 | 0.01 | 1.35E-06  |
| CD40   | rs892090    | 19 | 55027704  | G | T | 0.83 | 0.07  | 0.01 | 2.08E-06  |
| CD40   | rs13345625  | 19 | 57324544  | A | C | 0.36 | -0.05 | 0.01 | 2.52E-05  |
| CD40   | rs4810485   | 20 | 46119308  | G | T | 0.75 | 0.42  | 0.01 | 4.15E-229 |
| CD40LG | rs13084580  | 3  | 39146691  | T | C | 0.11 | 0.08  | 0.01 | 5.13E-06  |
| CD40LG | rs1354034   | 3  | 56815721  | C | T | 0.60 | -0.07 | 0.01 | 4.00E-09  |
| CD40LG | rs4698839   | 4  | 101880784 | T | C | 0.40 | -0.06 | 0.01 | 1.09E-07  |
| CD40LG | rs6848819   | 4  | 153530526 | C | A | 0.03 | 0.14  | 0.02 | 1.10E-05  |
| CD40LG | rs2248116   | 5  | 132468655 | A | C | 0.57 | 0.06  | 0.01 | 2.07E-06  |
| CD40LG | rs6961069   | 7  | 80589645  | T | C | 0.40 | 0.05  | 0.01 | 9.09E-06  |
| CD40LG | rs6993770   | 8  | 105569300 | T | A | 0.29 | -0.13 | 0.01 | 2.97E-25  |
| CD40LG | rs151234    | 16 | 28494339  | C | G | 0.13 | 0.08  | 0.01 | 1.56E-05  |
| CD40LG | rs12445050  | 16 | 81837364  | T | C | 0.14 | 0.09  | 0.01 | 3.10E-08  |
| CD40LG | rs1654425   | 19 | 55027612  | C | T | 0.83 | 0.14  | 0.01 | 1.58E-18  |
| CD40LG | rs13038837  | 20 | 19279307  | A | G | 0.34 | 0.06  | 0.01 | 1.36E-06  |
| CD40LG | rs4239702   | 20 | 46120612  | C | T | 0.72 | -0.11 | 0.01 | 2.58E-19  |
| CD46   | rs61747728  | 1  | 179557079 | T | C | 0.04 | 0.16  | 0.02 | 5.73E-08  |
| CD46   | rs1970530   | 1  | 207750721 | A | G | 0.59 | -0.09 | 0.01 | 2.99E-14  |
| CD46   | rs6993770   | 8  | 105569300 | T | A | 0.29 | -0.06 | 0.01 | 9.89E-07  |
| CD46   | rs579459    | 9  | 133278724 | C | T | 0.21 | -0.06 | 0.01 | 1.48E-05  |
| CD46   | rs10740131  | 10 | 63511728  | T | A | 0.47 | 0.06  | 0.01 | 2.07E-07  |
| CD46   | rs972570    | 10 | 69512262  | T | C | 0.49 | 0.08  | 0.01 | 3.71E-12  |
| CD46   | rs545303153 | 17 | 7251756   | A | G | 0.00 | 0.63  | 0.08 | 1.59E-07  |
| CD46   | rs1654425   | 19 | 55027612  | C | T | 0.83 | 0.07  | 0.01 | 3.01E-06  |
| CD48   | -           | 1  | 43812246  | G | A | 0.29 | 0.06  | 0.01 | 9.26E-07  |
| CD48   | rs2295615   | 1  | 160684968 | G | C | 0.14 | -0.92 | 0.01 | 0.00E+00  |
| CD48   | rs4672507   | 2  | 62343438  | A | T | 0.64 | 0.06  | 0.01 | 3.06E-08  |
| CD48   | rs6791438   | 3  | 170031236 | G | A | 0.37 | -0.07 | 0.01 | 3.66E-12  |
| CD48   | rs3872724   | 3  | 187023433 | T | C | 0.37 | -0.05 | 0.01 | 2.44E-07  |
| CD48   | rs35467801  | 5  | 35881028  | T | G | 0.27 | -0.05 | 0.01 | 3.74E-06  |
| CD48   | rs2844622   | 6  | 31272283  | G | A | 0.66 | 0.07  | 0.01 | 1.14E-11  |

|      |             |    |           |   |   |      |       |      |           |
|------|-------------|----|-----------|---|---|------|-------|------|-----------|
| CD48 | rs60843925  | 11 | 126368937 | C | T | 0.14 | -0.08 | 0.01 | 8.34E-08  |
| CD48 | rs3184504   | 12 | 111446804 | C | T | 0.52 | -0.14 | 0.01 | 2.83E-44  |
| CD48 | rs2393716   | 12 | 120904130 | G | C | 0.48 | -0.06 | 0.01 | 1.01E-09  |
| CD48 | rs76428106  | 13 | 28029870  | C | T | 0.01 | 0.25  | 0.03 | 6.95E-08  |
| CD48 | rs186021206 | 17 | 7166093   | A | G | 0.01 | 1.18  | 0.04 | 4.25E-67  |
| CD48 | rs2659005   | 17 | 81244914  | T | C | 0.44 | 0.10  | 0.01 | 1.32E-21  |
| CD48 | rs78530667  | 19 | 43396545  | C | T | 0.13 | -0.07 | 0.01 | 4.33E-06  |
| CD5  | rs10214237  | 5  | 35883632  | C | T | 0.27 | -0.08 | 0.01 | 1.95E-10  |
| CD5  | rs952579    | 6  | 21884209  | A | G | 0.14 | 0.07  | 0.01 | 1.46E-05  |
| CD5  | rs9266635   | 6  | 31379202  | T | C | 0.77 | -0.08 | 0.01 | 1.34E-08  |
| CD5  | rs4939490   | 11 | 61026179  | G | C | 0.39 | -0.14 | 0.01 | 7.70E-33  |
| CD5  | rs3184504   | 12 | 111446804 | C | T | 0.52 | -0.15 | 0.01 | 4.12E-41  |
| CD5  | rs7161799   | 15 | 58478324  | T | C | 0.08 | 0.13  | 0.01 | 1.73E-10  |
| CD5  | rs7208422   | 17 | 78134494  | T | A | 0.48 | -0.05 | 0.01 | 5.62E-06  |
| CD5  | rs4893      | 19 | 48330351  | G | A | 0.04 | -0.13 | 0.02 | 9.45E-06  |
| CD55 | rs1583090   | 1  | 207262438 | C | T | 0.22 | -0.48 | 0.01 | 2.38E-274 |
| CD55 | rs1260326   | 2  | 27508073  | C | T | 0.61 | 0.05  | 0.01 | 2.55E-05  |
| CD55 | rs13107325  | 4  | 102267552 | T | C | 0.08 | 0.14  | 0.01 | 1.43E-10  |
| CD55 | -           | 7  | 7216532   | C | T | 0.61 | 0.06  | 0.01 | 1.52E-07  |
| CD55 | rs2978024   | 8  | 133536866 | A | C | 0.68 | 0.08  | 0.01 | 6.50E-11  |
| CD55 | rs774510679 | 10 | 63304076  | A | C | 0.41 | 0.05  | 0.01 | 1.65E-06  |
| CD55 | rs777834943 | 16 | 20355409  | T | C | 0.18 | -0.07 | 0.01 | 7.44E-06  |
| CD55 | rs186021206 | 17 | 7166093   | A | G | 0.01 | 1.07  | 0.05 | 1.63E-45  |
| CD55 | rs3814995   | 19 | 35851310  | T | C | 0.32 | 0.06  | 0.01 | 7.72E-07  |
| CD58 | rs10801908  | 1  | 116547871 | T | C | 0.12 | -0.26 | 0.01 | 3.41E-51  |
| CD58 | rs3213563   | 1  | 172443855 | C | T | 0.56 | -0.18 | 0.01 | 2.89E-56  |
| CD58 | rs1260326   | 2  | 27508073  | C | T | 0.61 | 0.05  | 0.01 | 2.77E-06  |
| CD58 | rs10935473  | 3  | 98698056  | T | G | 0.44 | -0.06 | 0.01 | 4.14E-08  |
| CD58 | rs13064814  | 3  | 186936977 | G | A | 0.71 | -0.06 | 0.01 | 9.60E-07  |
| CD58 | rs9987289   | 8  | 9325848   | G | A | 0.91 | -0.11 | 0.01 | 2.59E-08  |
| CD58 | rs2519093   | 9  | 133266456 | T | C | 0.18 | -0.45 | 0.01 | 6.65E-212 |
| CD58 | rs2393969   | 10 | 63380680  | C | A | 0.47 | 0.05  | 0.01 | 1.37E-06  |
| CD58 | rs3967200   | 11 | 126362490 | T | C | 0.13 | -0.10 | 0.01 | 9.88E-10  |
| CD58 | rs186021206 | 17 | 7166093   | A | G | 0.01 | 1.28  | 0.05 | 1.22E-64  |
| CD58 | rs2659005   | 17 | 81244914  | T | C | 0.44 | 0.05  | 0.01 | 3.56E-06  |
| CD58 | rs4760      | 19 | 43648948  | G | A | 0.16 | 0.08  | 0.01 | 4.85E-08  |
| CD59 | rs400642    | 1  | 196788128 | T | C | 0.47 | -0.07 | 0.01 | 1.46E-10  |
| CD59 | rs1398018   | 4  | 76451770  | C | T | 0.44 | 0.05  | 0.01 | 3.27E-06  |
| CD59 | rs2273121   | 11 | 33736224  | A | G | 0.26 | -0.26 | 0.01 | 2.48E-101 |
| CD59 | rs77924615  | 16 | 20381010  | A | G | 0.20 | -0.07 | 0.01 | 6.45E-08  |
| CD59 | rs407307    | 17 | 39670910  | G | A | 0.68 | 0.05  | 0.01 | 5.26E-06  |
| CD6  | rs7578575   | 2  | 25265950  | A | T | 0.29 | 0.05  | 0.01 | 8.84E-06  |
| CD6  | rs4672497   | 2  | 62296430  | G | C | 0.22 | 0.05  | 0.01 | 1.68E-06  |
| CD6  | rs57383920  | 3  | 47207585  | A | T | 0.19 | -0.05 | 0.01 | 1.72E-05  |
| CD6  | rs10214273  | 5  | 35883884  | G | T | 0.27 | -0.05 | 0.01 | 2.33E-05  |
| CD6  | rs62454712  | 7  | 6458426   | C | T | 0.24 | 0.05  | 0.01 | 2.20E-05  |
| CD6  | rs10957898  | 8  | 78705078  | A | G | 0.21 | 0.05  | 0.01 | 2.79E-05  |
| CD6  | rs11230563  | 11 | 61008737  | T | C | 0.35 | -0.81 | 0.01 | 0.00E+00  |
| CD6  | rs3184504   | 12 | 111446804 | C | T | 0.52 | -0.11 | 0.01 | 4.72E-31  |
| CD6  | rs7161799   | 15 | 58478324  | T | C | 0.08 | 0.10  | 0.01 | 1.90E-08  |
| CD6  | rs71374020  | 16 | 30641303  | T | A | 0.30 | -0.05 | 0.01 | 5.59E-06  |
| CD6  | rs186021206 | 17 | 7166093   | A | G | 0.01 | 0.48  | 0.04 | 2.71E-14  |
| CD6  | rs7208422   | 17 | 78134494  | T | A | 0.48 | -0.07 | 0.01 | 6.22E-16  |
| CD6  | rs28413174  | 19 | 17405811  | T | C | 0.12 | 0.11  | 0.01 | 2.03E-14  |
| CD63 | rs2278668   | 3  | 123116385 | C | T | 0.59 | -0.06 | 0.01 | 1.23E-06  |
| CD63 | rs755492124 | 4  | 101856385 | T | G | 0.39 | -0.07 | 0.01 | 1.36E-09  |

|       |             |    |           |   |   |      |       |      |           |
|-------|-------------|----|-----------|---|---|------|-------|------|-----------|
| CD63  | rs11242109  | 5  | 132341354 | T | G | 0.48 | -0.07 | 0.01 | 1.22E-08  |
| CD63  | rs342299    | 7  | 106733272 | T | C | 0.46 | -0.05 | 0.01 | 7.60E-06  |
| CD63  | rs6993770   | 8  | 105569300 | T | A | 0.29 | -0.17 | 0.01 | 5.28E-44  |
| CD63  | -           | 10 | 63433569  | C | T | 0.49 | -0.05 | 0.01 | 2.95E-06  |
| CD63  | rs113422568 | 10 | 102578181 | A | G | 0.33 | 0.09  | 0.01 | 1.78E-13  |
| CD63  | rs187372065 | 12 | 55798095  | G | C | 0.00 | -0.72 | 0.07 | 6.72E-10  |
| CD63  | rs12445050  | 16 | 81837364  | T | C | 0.14 | 0.08  | 0.01 | 8.11E-07  |
| CD63  | rs35496032  | 19 | 38326988  | A | G | 0.01 | 0.37  | 0.03 | 1.42E-13  |
| CD63  | rs892090    | 19 | 55027704  | G | T | 0.83 | 0.14  | 0.01 | 7.44E-21  |
| CD63  | rs4813637   | 20 | 3702115   | A | G | 0.59 | -0.11 | 0.01 | 8.96E-21  |
| CD69  | rs1354034   | 3  | 56815721  | C | T | 0.60 | 0.09  | 0.01 | 7.63E-14  |
| CD69  | rs3804749   | 3  | 123114156 | T | C | 0.59 | -0.05 | 0.01 | 1.34E-05  |
| CD69  | rs6993770   | 8  | 105569300 | T | A | 0.29 | -0.12 | 0.01 | 4.03E-22  |
| CD69  | rs7896518   | 10 | 63344740  | G | A | 0.42 | 0.09  | 0.01 | 5.32E-15  |
| CD69  | rs12819552  | 12 | 9767236   | G | A | 0.42 | -0.05 | 0.01 | 1.59E-05  |
| CD69  | rs200309755 | 17 | 29518756  | T | C | 0.54 | 0.05  | 0.01 | 2.74E-05  |
| CD69  | rs1671152   | 19 | 55014977  | G | T | 0.84 | 0.07  | 0.01 | 2.37E-05  |
| CD70  | rs17118876  | 1  | 59151238  | G | C | 0.57 | -0.04 | 0.01 | 3.75E-06  |
| CD70  | rs12740374  | 1  | 109274968 | T | G | 0.22 | -0.30 | 0.01 | 2.10E-205 |
| CD70  | rs57894427  | 6  | 29938267  | C | T | 0.09 | 0.07  | 0.01 | 1.48E-06  |
| CD70  | rs7254538   | 19 | 6611325   | C | G | 0.54 | 0.75  | 0.01 | 0.00E+00  |
| CD74  | rs79078220  | 5  | 150414087 | A | G | 0.11 | -0.09 | 0.01 | 6.54E-07  |
| CD74  | rs9273368   | 6  | 32658698  | A | G | 0.30 | 0.18  | 0.01 | 6.92E-51  |
| CD74  | -           | 9  | 133263362 | G | A | 0.18 | -0.14 | 0.01 | 2.51E-25  |
| CD74  | rs3184504   | 12 | 111446804 | C | T | 0.52 | -0.13 | 0.01 | 1.12E-32  |
| CD74  | rs7194862   | 16 | 10871258  | C | T | 0.29 | 0.14  | 0.01 | 3.74E-31  |
| CD74  | rs186021206 | 17 | 7166093   | A | G | 0.01 | 0.39  | 0.05 | 1.61E-07  |
| CD74  | rs3827211   | 21 | 41247327  | G | A | 0.45 | -0.05 | 0.01 | 2.57E-06  |
| CD79B | rs72704449  | 1  | 179504138 | C | T | 0.04 | 0.13  | 0.02 | 8.97E-06  |
| CD79B | rs78444298  | 1  | 184702964 | A | G | 0.02 | 0.31  | 0.03 | 1.57E-14  |
| CD79B | rs112151347 | 2  | 226830730 | A | G | 0.03 | -0.21 | 0.02 | 5.40E-09  |
| CD79B | rs77397204  | 3  | 187021111 | C | A | 0.39 | -0.06 | 0.01 | 2.13E-08  |
| CD79B | rs112824187 | 5  | 158838300 | A | G | 0.08 | -0.12 | 0.01 | 2.02E-08  |
| CD79B | rs55654737  | 5  | 179791841 | A | G | 0.34 | -0.09 | 0.01 | 2.43E-13  |
| CD79B | rs2523583   | 6  | 31360118  | A | G | 0.71 | -0.06 | 0.01 | 5.53E-06  |
| CD79B | rs2395904   | 8  | 129605573 | G | T | 0.27 | -0.06 | 0.01 | 5.75E-06  |
| CD79B | rs507666    | 9  | 133273983 | A | G | 0.18 | -0.24 | 0.01 | 1.92E-65  |
| CD79B | rs7087507   | 10 | 61985930  | G | A | 0.35 | 0.06  | 0.01 | 1.60E-06  |
| CD79B | rs111338191 | 12 | 111388673 | T | A | 0.52 | -0.07 | 0.01 | 2.20E-10  |
| CD79B | rs76428106  | 13 | 28029870  | C | T | 0.01 | 0.26  | 0.03 | 4.34E-07  |
| CD79B | rs9939427   | 16 | 85982485  | A | G | 0.23 | 0.07  | 0.01 | 4.71E-07  |
| CD79B | rs186021206 | 17 | 7166093   | A | G | 0.01 | 0.81  | 0.05 | 9.47E-27  |
| CD79B | rs12946510  | 17 | 39756124  | T | C | 0.48 | -0.06 | 0.01 | 2.01E-07  |
| CD79B | rs12946669  | 17 | 63928647  | T | C | 0.39 | -0.16 | 0.01 | 2.93E-47  |
| CD79B | rs7213540   | 17 | 81282112  | T | C | 0.54 | -0.05 | 0.01 | 3.33E-06  |
| CD79B | rs4674      | 19 | 41424491  | G | A | 0.61 | 0.07  | 0.01 | 8.90E-09  |
| CD83  | rs11808882  | 1  | 212790930 | T | A | 0.15 | -0.07 | 0.01 | 1.78E-05  |
| CD83  | rs35332487  | 2  | 62283253  | A | C | 0.31 | -0.06 | 0.01 | 2.21E-06  |
| CD83  | rs7640397   | 3  | 46948338  | T | C | 0.58 | -0.05 | 0.01 | 3.31E-06  |
| CD83  | rs12526086  | 6  | 14105666  | A | G | 0.22 | 0.20  | 0.01 | 9.99E-51  |
| CD83  | rs2394982   | 6  | 31345253  | T | C | 0.31 | 0.06  | 0.01 | 7.24E-07  |
| CD83  | rs7801921   | 7  | 6351186   | G | C | 0.46 | 0.05  | 0.01 | 2.46E-06  |
| CD83  | rs4424335   | 9  | 133238172 | G | C | 0.08 | 0.12  | 0.01 | 8.42E-09  |
| CD83  | rs7869      | 10 | 71816550  | T | C | 0.29 | 0.10  | 0.01 | 6.46E-16  |
| CD83  | rs4753126   | 11 | 94128854  | T | C | 0.50 | 0.05  | 0.01 | 9.73E-06  |
| CD83  | rs3184504   | 12 | 111446804 | C | T | 0.52 | -0.11 | 0.01 | 4.66E-24  |

|        |             |    |           |   |   |      |       |      |           |
|--------|-------------|----|-----------|---|---|------|-------|------|-----------|
| CD83   | rs534297892 | 12 | 120911539 | C | A | 0.50 | -0.07 | 0.01 | 4.21E-10  |
| CD83   | rs76428106  | 13 | 28029870  | C | T | 0.01 | 0.35  | 0.03 | 6.72E-12  |
| CD83   | rs186021206 | 17 | 7166093   | A | G | 0.01 | 0.46  | 0.05 | 2.49E-09  |
| CD83   | rs2150879   | 17 | 59781849  | A | G | 0.55 | 0.05  | 0.01 | 2.49E-06  |
| CD83   | rs34878396  | 19 | 3546266   | T | C | 0.01 | 0.31  | 0.03 | 3.97E-10  |
| CD84   | rs11265440  | 1  | 160583854 | G | A | 0.92 | -0.20 | 0.01 | 1.47E-22  |
| CD84   | rs41315846  | 1  | 247549001 | C | T | 0.48 | -0.06 | 0.01 | 1.70E-06  |
| CD84   | rs1354034   | 3  | 56815721  | C | T | 0.60 | 0.08  | 0.01 | 9.88E-13  |
| CD84   | rs114694170 | 5  | 88884379  | C | T | 0.06 | 0.13  | 0.02 | 2.14E-07  |
| CD84   | rs778641135 | 6  | 135097494 | T | C | 0.26 | 0.07  | 0.01 | 6.08E-08  |
| CD84   | rs6993770   | 8  | 105569300 | T | A | 0.29 | -0.08 | 0.01 | 7.03E-10  |
| CD84   | rs409801    | 9  | 4744743   | C | T | 0.51 | 0.07  | 0.01 | 4.13E-09  |
| CD84   | rs467369    | 9  | 134040643 | T | C | 0.53 | 0.05  | 0.01 | 2.27E-05  |
| CD84   | rs7080386   | 10 | 63288546  | A | C | 0.41 | 0.08  | 0.01 | 2.86E-11  |
| CD84   | rs597808    | 12 | 111535554 | G | A | 0.52 | -0.08 | 0.01 | 2.41E-12  |
| CD84   | rs10131298  | 14 | 103102277 | A | T | 0.25 | 0.21  | 0.01 | 3.63E-59  |
| CD84   | rs151165225 | 19 | 45257662  | T | C | 0.26 | -0.09 | 0.01 | 1.71E-12  |
| CD8A   | rs3020726   | 2  | 86789383  | G | A | 0.16 | 0.36  | 0.01 | 8.69E-127 |
| CD8A   | rs35467801  | 5  | 35881028  | T | G | 0.27 | -0.07 | 0.01 | 3.98E-08  |
| CD8A   | rs12211087  | 6  | 31302169  | A | T | 0.09 | 0.47  | 0.01 | 3.02E-134 |
| CD8A   | rs12360863  | 11 | 11289644  | T | C | 0.25 | -0.06 | 0.01 | 5.38E-06  |
| CD8A   | rs597808    | 12 | 111535554 | G | A | 0.52 | -0.07 | 0.01 | 1.79E-09  |
| CD93   | rs61747728  | 1  | 179557079 | T | C | 0.04 | 0.18  | 0.02 | 5.25E-09  |
| CD93   | rs1260326   | 2  | 27508073  | C | T | 0.61 | 0.06  | 0.01 | 5.08E-07  |
| CD93   | rs9264666   | 6  | 31271519  | C | G | 0.55 | -0.05 | 0.01 | 2.73E-05  |
| CD93   | rs7821812   | 8  | 10786591  | C | G | 0.21 | -0.08 | 0.01 | 3.90E-08  |
| CD93   | rs4962111   | 9  | 133237150 | C | T | 0.09 | 0.12  | 0.01 | 5.21E-09  |
| CD93   | rs12245367  | 10 | 63561704  | T | C | 0.48 | -0.05 | 0.01 | 1.93E-05  |
| CD99   | rs1260326   | 2  | 27508073  | C | T | 0.61 | 0.06  | 0.01 | 1.53E-08  |
| CD99   | rs12149545  | 16 | 56959249  | A | G | 0.32 | 0.05  | 0.01 | 2.67E-05  |
| CD99   | rs704       | 17 | 28367840  | A | G | 0.47 | 0.06  | 0.01 | 2.10E-09  |
| CD99   | rs673408    | 18 | 32220156  | G | A | 0.46 | -0.11 | 0.01 | 8.38E-28  |
| CD99L2 | rs4665710   | 2  | 20998163  | C | A | 0.79 | -0.07 | 0.01 | 1.51E-06  |
| CD99L2 | rs139039156 | 3  | 123123409 | A | G | 0.01 | -0.29 | 0.04 | 7.62E-06  |
| CD99L2 | rs6054      | 4  | 154568456 | T | C | 0.01 | 0.38  | 0.05 | 1.07E-06  |
| CD99L2 | rs73015965  | 6  | 160706469 | G | A | 0.01 | 0.35  | 0.05 | 6.38E-06  |
| CD99L2 | rs896173    | 7  | 35695927  | A | G | 0.42 | -0.06 | 0.01 | 8.43E-07  |
| CD99L2 | rs10740131  | 10 | 63511728  | T | A | 0.47 | 0.05  | 0.01 | 3.39E-06  |
| CD99L2 | rs174536    | 11 | 61784455  | C | A | 0.35 | 0.12  | 0.01 | 5.17E-24  |
| CD99L2 | rs1801689   | 17 | 66214462  | C | A | 0.03 | 0.48  | 0.02 | 1.99E-47  |
| CD99L2 | rs1065853   | 19 | 44909976  | T | G | 0.08 | 0.13  | 0.01 | 4.43E-10  |
| CDC27  | rs1354034   | 3  | 56815721  | C | T | 0.60 | 0.05  | 0.01 | 2.15E-05  |
| CDC27  | rs56287938  | 17 | 47220547  | G | C | 0.10 | 0.14  | 0.01 | 1.65E-12  |
| CDC37  | rs1354034   | 3  | 56815721  | C | T | 0.60 | 0.06  | 0.01 | 5.86E-07  |
| CDC37  | rs342298    | 7  | 106733200 | T | C | 0.46 | -0.06 | 0.01 | 1.44E-07  |
| CDC37  | -           | 10 | 63156270  | A | T | 0.49 | 0.05  | 0.01 | 1.36E-05  |
| CDC37  | rs73396521  | 11 | 267568    | A | G | 0.25 | 0.06  | 0.01 | 2.41E-05  |
| CDCP1  | rs2276862   | 3  | 45146293  | G | C | 0.17 | -0.30 | 0.01 | 4.09E-119 |
| CDCP1  | rs113787140 | 6  | 32535124  | A | T | 0.50 | -0.08 | 0.01 | 4.12E-17  |
| CDCP1  | rs77029323  | 10 | 62690119  | T | G | 0.40 | 0.06  | 0.01 | 6.67E-08  |
| CDCP1  | rs683486    | 11 | 126356768 | A | C | 0.40 | -0.13 | 0.01 | 1.68E-36  |
| CDCP1  | rs11048473  | 12 | 26340881  | T | C | 0.27 | 0.06  | 0.01 | 1.19E-07  |
| CDCP1  | rs35350651  | 12 | 111469627 | C | A | 0.50 | -0.05 | 0.01 | 1.16E-06  |
| CDCP1  | rs7485656   | 12 | 124831101 | G | A | 0.14 | 0.08  | 0.01 | 6.60E-09  |
| CDCP1  | rs186021206 | 17 | 7166093   | A | G | 0.01 | 0.56  | 0.04 | 3.42E-17  |
| CDCP1  | rs3747207   | 22 | 43928975  | A | G | 0.22 | 0.06  | 0.01 | 1.53E-07  |



|       |             |    |           |   |   |      |       |      |           |
|-------|-------------|----|-----------|---|---|------|-------|------|-----------|
| CDH1  | rs2519093   | 9  | 133266456 | T | C | 0.18 | -0.35 | 0.01 | 1.62E-133 |
| CDH1  | rs10749609  | 10 | 80489996  | A | G | 0.79 | 0.07  | 0.01 | 8.92E-07  |
| CDH1  | rs186021206 | 17 | 7166093   | A | G | 0.01 | 0.44  | 0.05 | 7.49E-09  |
| CDH1  | rs708686    | 19 | 5840608   | T | C | 0.27 | 0.09  | 0.01 | 3.43E-13  |
| CDH1  | rs3814995   | 19 | 35851310  | T | C | 0.31 | 0.06  | 0.01 | 1.36E-06  |
| CDH1  | rs681343    | 19 | 48703205  | T | C | 0.51 | -0.43 | 0.01 | 0.00E+00  |
| CDH15 | rs10923344  | 1  | 117554006 | A | G | 0.62 | 0.04  | 0.01 | 5.75E-06  |
| CDH15 | -           | 2  | 203358071 | T | G | 0.57 | -0.04 | 0.01 | 1.52E-05  |
| CDH15 | rs34707604  | 4  | 68625738  | C | T | 0.26 | -0.05 | 0.01 | 4.87E-06  |
| CDH15 | -           | 10 | 5204247   | A | C | 0.14 | 0.06  | 0.01 | 1.85E-05  |
| CDH15 | rs11646135  | 16 | 89132700  | A | G | 0.14 | 0.44  | 0.01 | 2.59E-214 |
| CDH15 | rs2240715   | 22 | 19973083  | C | G | 0.30 | 0.06  | 0.01 | 4.12E-09  |
| CDH17 | rs12084158  | 1  | 120065830 | G | A | 0.10 | 0.09  | 0.01 | 8.94E-07  |
| CDH17 | rs533137864 | 1  | 212828526 | A | C | 0.15 | -0.10 | 0.01 | 2.68E-12  |
| CDH17 | rs55898964  | 2  | 107023243 | G | A | 0.29 | 0.15  | 0.01 | 2.77E-43  |
| CDH17 | rs9815073   | 3  | 188397894 | A | C | 0.34 | -0.06 | 0.01 | 2.15E-08  |
| CDH17 | rs3128921   | 6  | 33102972  | A | C | 0.26 | 0.09  | 0.01 | 3.82E-15  |
| CDH17 | rs4556017   | 7  | 100989509 | T | C | 0.85 | -0.12 | 0.01 | 3.59E-17  |
| CDH17 | rs763526069 | 8  | 94191597  | A | C | 0.47 | -0.27 | 0.01 | 2.73E-156 |
| CDH17 | rs550057    | 9  | 133271182 | T | C | 0.26 | -0.45 | 0.01 | 0.00E+00  |
| CDH17 | rs56278466  | 10 | 17833858  | G | T | 0.66 | 0.05  | 0.01 | 1.89E-05  |
| CDH17 | rs12801491  | 11 | 126476973 | A | G | 0.20 | 0.06  | 0.01 | 2.96E-06  |
| CDH17 | rs2280381   | 16 | 85985027  | T | C | 0.61 | -0.05 | 0.01 | 8.35E-07  |
| CDH17 | rs186021206 | 17 | 7166093   | A | G | 0.01 | 0.55  | 0.04 | 7.83E-16  |
| CDH17 | rs708686    | 19 | 5840608   | T | C | 0.27 | 0.15  | 0.01 | 3.14E-39  |
| CDH17 | rs679574    | 19 | 48702851  | G | C | 0.51 | -0.38 | 0.01 | 8.79E-299 |
| CDH2  | rs772351164 | 2  | 113909621 | G | T | 0.08 | -0.11 | 0.01 | 1.05E-07  |
| CDH2  | rs4074793   | 5  | 52897294  | G | A | 0.07 | 0.12  | 0.01 | 9.31E-09  |
| CDH2  | rs17054431  | 5  | 157295418 | T | C | 0.05 | -0.19 | 0.02 | 1.07E-15  |
| CDH2  | rs1800562   | 6  | 26092913  | A | G | 0.08 | 0.09  | 0.01 | 9.67E-06  |
| CDH2  | rs112875651 | 8  | 125494452 | A | G | 0.39 | -0.06 | 0.01 | 1.83E-07  |
| CDH2  | rs181242111 | 10 | 17823665  | A | G | 0.12 | 0.09  | 0.01 | 2.57E-07  |
| CDH2  | rs9633740   | 10 | 80505515  | G | A | 0.80 | 0.11  | 0.01 | 1.10E-16  |
| CDH2  | rs7108216   | 11 | 702097    | C | T | 0.60 | 0.05  | 0.01 | 1.21E-05  |
| CDH2  | rs11045834  | 12 | 21188162  | T | C | 0.28 | -0.05 | 0.01 | 1.72E-05  |
| CDH2  | rs28929474  | 14 | 94378610  | T | C | 0.02 | 0.28  | 0.02 | 7.38E-14  |
| CDH2  | rs116698525 | 16 | 528190    | T | C | 0.11 | -0.14 | 0.01 | 2.61E-18  |
| CDH2  | rs11869771  | 17 | 9683405   | C | A | 0.24 | 0.08  | 0.01 | 6.27E-12  |
| CDH2  | rs11657440  | 17 | 81513660  | C | T | 0.42 | 0.05  | 0.01 | 1.48E-05  |
| CDH2  | rs11872284  | 18 | 28100459  | T | C | 0.31 | -0.10 | 0.01 | 2.08E-19  |
| CDH3  | rs12137270  | 1  | 116721714 | T | C | 0.24 | 0.06  | 0.01 | 1.81E-06  |
| CDH3  | rs61747728  | 1  | 179557079 | T | C | 0.04 | 0.15  | 0.02 | 1.04E-06  |
| CDH3  | rs1260326   | 2  | 27508073  | C | T | 0.61 | 0.06  | 0.01 | 1.85E-06  |
| CDH3  | rs4934189   | 10 | 80455036  | T | C | 0.54 | 0.09  | 0.01 | 8.07E-15  |
| CDH3  | rs4997081   | 16 | 20353912  | C | G | 0.19 | -0.07 | 0.01 | 6.96E-07  |
| CDH3  | rs138190335 | 16 | 68685216  | C | T | 0.00 | 0.75  | 0.06 | 1.08E-16  |
| CDH3  | rs3814995   | 19 | 35851310  | T | C | 0.31 | 0.07  | 0.01 | 5.25E-08  |
| CDH5  | rs61802301  | 1  | 161605359 | C | T | 0.57 | 0.05  | 0.01 | 1.06E-06  |
| CDH5  | rs1260326   | 2  | 27508073  | C | T | 0.61 | 0.06  | 0.01 | 7.97E-08  |
| CDH5  | rs13107325  | 4  | 102267552 | T | C | 0.08 | 0.12  | 0.01 | 4.65E-10  |
| CDH5  | rs10093     | 6  | 32641396  | G | C | 0.38 | 0.06  | 0.01 | 7.90E-08  |
| CDH5  | rs8176743   | 9  | 133256028 | T | C | 0.06 | 1.20  | 0.02 | 0.00E+00  |
| CDH5  | rs35166255  | 11 | 126431861 | A | G | 0.03 | 0.29  | 0.02 | 3.84E-25  |
| CDH5  | rs3184504   | 12 | 111446804 | C | T | 0.52 | -0.04 | 0.01 | 2.27E-05  |
| CDH5  | rs16956504  | 16 | 66398478  | C | T | 0.10 | 0.31  | 0.01 | 6.25E-75  |
| CDH5  | rs186021206 | 17 | 7166093   | A | G | 0.01 | 0.58  | 0.05 | 4.68E-16  |

|        |             |    |           |   |   |      |       |      |           |
|--------|-------------|----|-----------|---|---|------|-------|------|-----------|
| CDH5   | rs3814995   | 19 | 35851310  | T | C | 0.31 | 0.05  | 0.01 | 2.73E-06  |
| CDH5   | rs660745    | 19 | 48716202  | C | T | 0.54 | -0.05 | 0.01 | 1.07E-06  |
| CDH5   | rs5757670   | 22 | 39433731  | A | G | 0.69 | -0.06 | 0.01 | 5.20E-07  |
| CDH6   | rs4626350   | 5  | 30839344  | A | G | 0.56 | 0.51  | 0.01 | 0.00E+00  |
| CDH6   | rs6993770   | 8  | 105569300 | T | A | 0.29 | 0.07  | 0.01 | 1.97E-10  |
| CDH6   | rs60757417  | 9  | 132989049 | G | C | 0.06 | 0.09  | 0.01 | 2.01E-05  |
| CDH6   | rs11553699  | 12 | 121779004 | G | A | 0.14 | 0.07  | 0.01 | 2.11E-05  |
| CDH6   | rs186021206 | 17 | 7166093   | A | G | 0.01 | 0.54  | 0.04 | 2.27E-15  |
| CDH6   | rs4820378   | 22 | 39473204  | T | C | 0.46 | 0.05  | 0.01 | 2.11E-07  |
| CDHR1  | rs61816761  | 1  | 152313385 | A | G | 0.02 | 0.19  | 0.03 | 2.28E-06  |
| CDHR1  | rs12330170  | 3  | 98787654  | C | A | 0.45 | 0.08  | 0.01 | 8.67E-11  |
| CDHR1  | rs73186030  | 3  | 122294618 | T | C | 0.13 | 0.11  | 0.01 | 8.56E-10  |
| CDHR1  | rs7916271   | 10 | 84194464  | T | C | 0.50 | 0.23  | 0.01 | 1.42E-84  |
| CDHR2  | rs1497406   | 1  | 16178825  | G | A | 0.58 | 0.05  | 0.01 | 5.11E-08  |
| CDHR2  | rs4835265   | 4  | 145900258 | A | C | 0.16 | 0.06  | 0.01 | 3.40E-06  |
| CDHR2  | rs2963680   | 5  | 176515947 | T | C | 0.50 | -0.10 | 0.01 | 1.16E-24  |
| CDHR2  | rs73226270  | 12 | 120951307 | T | A | 0.07 | -0.10 | 0.01 | 1.20E-06  |
| CDHR2  | rs11621792  | 14 | 24402720  | T | C | 0.45 | 0.04  | 0.01 | 8.89E-06  |
| CDHR2  | rs28929474  | 14 | 94378610  | T | C | 0.02 | 0.15  | 0.02 | 1.29E-05  |
| CDHR2  | rs61462345  | 14 | 103098598 | G | C | 0.24 | 0.09  | 0.01 | 6.44E-15  |
| CDHR2  | -           | 15 | 60595685  | G | A | 0.62 | 0.06  | 0.01 | 5.19E-10  |
| CDHR2  | rs429358    | 19 | 44908684  | C | T | 0.16 | -0.06 | 0.01 | 1.75E-05  |
| CDHR2  | -           | 22 | 17981286  | A | T | 0.26 | -0.05 | 0.01 | 2.60E-06  |
| CDHR5  | rs5993      | 1  | 197061699 | T | A | 0.16 | 0.25  | 0.01 | 7.47E-76  |
| CDHR5  | rs35457250  | 3  | 186620775 | T | C | 0.01 | 0.30  | 0.04 | 7.63E-08  |
| CDHR5  | rs3130297   | 6  | 32231204  | T | C | 0.13 | -0.07 | 0.01 | 5.47E-06  |
| CDHR5  | -           | 7  | 28215112  | A | T | 0.09 | 0.10  | 0.01 | 4.34E-08  |
| CDHR5  | rs12360820  | 11 | 620927    | C | A | 0.83 | 0.69  | 0.01 | 0.00E+00  |
| CDHR5  | rs61889524  | 11 | 32870002  | G | A | 0.63 | -0.05 | 0.01 | 2.02E-05  |
| CDHR5  | rs174566    | 11 | 61824890  | G | A | 0.35 | 0.06  | 0.01 | 4.87E-06  |
| CDHR5  | rs28929474  | 14 | 94378610  | T | C | 0.02 | 0.22  | 0.02 | 6.13E-10  |
| CDHR5  | rs8178824   | 17 | 66228657  | T | C | 0.03 | 0.25  | 0.02 | 7.36E-17  |
| CDKN1A | rs1354034   | 3  | 56815721  | C | T | 0.60 | -0.08 | 0.01 | 4.72E-12  |
| CDKN1A | rs3176345   | 6  | 36682788  | C | G | 0.06 | -0.28 | 0.01 | 3.45E-33  |
| CDKN1A | rs139141690 | 7  | 101856650 | A | G | 0.00 | -0.43 | 0.05 | 5.62E-07  |
| CDKN1A | rs6993770   | 8  | 105569300 | T | A | 0.29 | -0.06 | 0.01 | 4.71E-07  |
| CDKN1A | rs7080386   | 10 | 63288546  | A | C | 0.41 | 0.06  | 0.01 | 1.96E-06  |
| CDKN1A | rs58345103  | 14 | 68736322  | A | G | 0.19 | -0.08 | 0.01 | 2.12E-07  |
| CDKN2D | rs1354034   | 3  | 56815721  | C | T | 0.60 | 0.11  | 0.01 | 1.18E-21  |
| CDKN2D | rs17622656  | 5  | 132485305 | A | G | 0.39 | -0.06 | 0.01 | 2.50E-06  |
| CDKN2D | rs342298    | 7  | 106733200 | T | C | 0.45 | -0.05 | 0.01 | 1.45E-05  |
| CDKN2D | rs6993770   | 8  | 105569300 | T | A | 0.29 | -0.08 | 0.01 | 5.51E-10  |
| CDKN2D | rs544626513 | 11 | 180302    | C | G | 0.23 | 0.07  | 0.01 | 2.79E-06  |
| CDNF   | rs61738953  | 10 | 14820083  | G | C | 0.03 | -1.12 | 0.02 | 2.75E-270 |
| CDON   | rs56278466  | 10 | 17833858  | G | T | 0.66 | 0.05  | 0.01 | 1.62E-05  |
| CDON   | rs607980    | 11 | 126132788 | A | G | 0.91 | -0.18 | 0.01 | 8.80E-21  |
| CDON   | rs215224    | 12 | 481283    | C | T | 0.40 | 0.05  | 0.01 | 1.52E-05  |
| CDON   | rs186021206 | 17 | 7166093   | A | G | 0.01 | 0.62  | 0.05 | 3.39E-16  |
| CDSN   | rs80293268  | 1  | 8147519   | C | G | 0.05 | -0.10 | 0.02 | 2.22E-05  |
| CDSN   | rs72674184  | 1  | 58592422  | C | T | 0.08 | -0.09 | 0.01 | 8.97E-07  |
| CDSN   | rs61816761  | 1  | 152313385 | A | G | 0.02 | 0.56  | 0.02 | 2.83E-61  |
| CDSN   | rs7545538   | 1  | 209806268 | G | C | 0.43 | -0.04 | 0.01 | 1.36E-05  |
| CDSN   | rs1436661   | 3  | 190304132 | G | A | 0.59 | 0.07  | 0.01 | 6.98E-13  |
| CDSN   | rs75278193  | 4  | 7432124   | C | A | 0.19 | -0.07 | 0.01 | 1.19E-08  |
| CDSN   | rs3095306   | 6  | 31095824  | A | T | 0.61 | 0.64  | 0.01 | 0.00E+00  |
| CDSN   | rs7835973   | 8  | 6865640   | G | A | 0.16 | 0.09  | 0.01 | 9.53E-11  |

|          |             |    |           |   |   |      |       |      |           |
|----------|-------------|----|-----------|---|---|------|-------|------|-----------|
| CDSN     | rs3758294   | 9  | 104902534 | C | T | 0.20 | -0.05 | 0.01 | 9.27E-06  |
| CDSN     | rs17658212  | 15 | 40853721  | T | C | 0.06 | -0.26 | 0.01 | 1.05E-36  |
| CDSN     | rs13329952  | 16 | 20355185  | C | T | 0.19 | -0.06 | 0.01 | 4.32E-06  |
| CDSN     | rs7200183   | 16 | 23195287  | G | C | 0.58 | -0.04 | 0.01 | 2.24E-05  |
| CDSN     | rs562177063 | 16 | 31131513  | T | C | 0.00 | -0.84 | 0.06 | 2.54E-19  |
| CDSN     | rs567144736 | 16 | 35196017  | A | G | 0.00 | -0.51 | 0.07 | 1.57E-05  |
| CDSN     | rs561579427 | 16 | 46954564  | G | A | 0.00 | -0.53 | 0.07 | 5.53E-06  |
| CDSN     | rs35187787  | 16 | 68822063  | A | G | 0.01 | -0.37 | 0.04 | 4.29E-08  |
| CDSN     | rs729988    | 17 | 47849091  | C | G | 0.37 | -0.05 | 0.01 | 3.77E-07  |
| CDSN     | rs761061860 | 19 | 38280727  | G | C | 0.17 | -0.19 | 0.01 | 4.60E-47  |
| CDSN     | rs16981329  | 19 | 49594675  | C | G | 0.23 | 0.06  | 0.01 | 7.62E-07  |
| CDSN     | rs6016547   | 20 | 41334351  | C | A | 0.17 | -0.06 | 0.01 | 2.48E-05  |
| CEACAM1  | rs36086195  | 1  | 16184399  | T | C | 0.58 | 0.05  | 0.01 | 3.75E-06  |
| CEACAM1  | rs114165349 | 1  | 26695422  | C | G | 0.02 | 0.17  | 0.02 | 5.34E-06  |
| CEACAM1  | rs4835265   | 4  | 145900258 | A | C | 0.16 | 0.08  | 0.01 | 1.77E-06  |
| CEACAM1  | -           | 9  | 133263362 | G | A | 0.18 | -0.25 | 0.01 | 1.42E-66  |
| CEACAM1  | rs11045856  | 12 | 21197755  | G | T | 0.24 | 0.07  | 0.01 | 2.01E-08  |
| CEACAM1  | rs56956502  | 14 | 103098707 | A | G | 0.25 | 0.06  | 0.01 | 1.43E-06  |
| CEACAM1  | rs10416089  | 19 | 42498217  | G | C | 0.08 | -0.48 | 0.01 | 1.98E-126 |
| CEACAM21 | rs7137828   | 12 | 111494996 | T | C | 0.52 | -0.04 | 0.00 | 4.83E-08  |
| CEACAM21 | rs186021206 | 17 | 7166093   | A | G | 0.01 | 0.23  | 0.03 | 1.06E-05  |
| CEACAM21 | rs140838345 | 19 | 41571242  | C | A | 0.78 | -1.26 | 0.01 | 0.00E+00  |
| CEACAM3  | rs139026664 | 2  | 89897441  | A | C | 0.08 | 0.18  | 0.01 | 1.73E-16  |
| CEACAM3  | rs62148538  | 2  | 94705474  | C | T | 0.04 | 0.18  | 0.02 | 4.46E-09  |
| CEACAM5  | rs77972916  | 2  | 43534973  | A | G | 0.08 | 0.09  | 0.01 | 1.80E-05  |
| CEACAM5  | rs12523278  | 5  | 61268080  | G | A | 0.50 | 0.05  | 0.01 | 2.49E-06  |
| CEACAM5  | rs60750824  | 7  | 100329813 | G | A | 0.18 | -0.06 | 0.01 | 1.04E-05  |
| CEACAM5  | rs4242701   | 9  | 36267264  | G | A | 0.43 | -0.06 | 0.01 | 1.53E-07  |
| CEACAM5  | rs375524395 | 9  | 106744749 | G | A | 0.46 | -0.10 | 0.01 | 1.54E-20  |
| CEACAM5  | -           | 9  | 133263362 | G | A | 0.18 | -0.21 | 0.01 | 3.75E-52  |
| CEACAM5  | rs12799864  | 11 | 126483589 | T | C | 0.20 | 0.08  | 0.01 | 1.77E-08  |
| CEACAM5  | rs7332827   | 13 | 109271066 | A | G | 0.71 | 0.05  | 0.01 | 9.67E-06  |
| CEACAM5  | rs186021206 | 17 | 7166093   | A | G | 0.01 | 0.35  | 0.05 | 5.30E-06  |
| CEACAM5  | rs117990138 | 17 | 48039100  | A | G | 0.07 | -0.10 | 0.01 | 3.66E-06  |
| CEACAM5  | rs708686    | 19 | 5840608   | T | C | 0.27 | 0.12  | 0.01 | 5.05E-19  |
| CEACAM5  | rs9621      | 19 | 41727239  | A | G | 0.04 | 0.96  | 0.02 | 4.82E-258 |
| CEACAM5  | rs681343    | 19 | 48703205  | T | C | 0.51 | 0.30  | 0.01 | 6.43E-155 |
| CEACAM5  | rs432938    | 21 | 41334846  | G | A | 0.21 | 0.10  | 0.01 | 9.61E-14  |
| CEACAM8  | rs3917932   | 1  | 36478315  | G | C | 0.58 | -0.06 | 0.01 | 1.14E-06  |
| CEACAM8  | rs112694524 | 2  | 43226582  | A | G | 0.07 | 0.10  | 0.01 | 8.17E-06  |
| CEACAM8  | rs2236947   | 3  | 50334001  | A | C | 0.48 | 0.09  | 0.01 | 1.84E-15  |
| CEACAM8  | rs3774298   | 3  | 187742311 | A | G | 0.69 | 0.07  | 0.01 | 1.74E-08  |
| CEACAM8  | rs12675298  | 8  | 6971291   | A | G | 0.02 | 0.21  | 0.03 | 3.18E-07  |
| CEACAM8  | rs35440906  | 8  | 60733792  | A | C | 0.19 | 0.21  | 0.01 | 2.30E-49  |
| CEACAM8  | rs1058900   | 11 | 308290    | C | T | 0.57 | 0.06  | 0.01 | 5.55E-07  |
| CEACAM8  | rs2511241   | 11 | 73234296  | T | C | 0.93 | 0.16  | 0.01 | 8.85E-14  |
| CEACAM8  | rs6503533   | 17 | 40028327  | T | C | 0.62 | -0.11 | 0.01 | 1.38E-21  |
| CEACAM8  | rs114641762 | 17 | 44339796  | A | C | 0.10 | -0.25 | 0.01 | 6.10E-40  |
| CEACAM8  | rs119468010 | 17 | 58272835  | A | G | 0.00 | 0.46  | 0.06 | 1.07E-06  |
| CEACAM8  | rs12459454  | 19 | 41759235  | G | A | 0.29 | -0.13 | 0.01 | 1.75E-26  |
| CEBPB    | rs1045929   | 17 | 40019173  | T | C | 0.39 | 0.07  | 0.01 | 7.43E-09  |
| CEBPB    | rs10404947  | 19 | 1081618   | G | A | 0.80 | 0.07  | 0.01 | 1.38E-06  |
| CEBPB    | rs4811031   | 20 | 50340417  | G | A | 0.35 | -0.05 | 0.01 | 1.18E-05  |
| CELA3A   | rs34262568  | 1  | 21986878  | A | G | 0.23 | 0.23  | 0.01 | 1.72E-72  |
| CELA3A   | rs333947    | 1  | 109928142 | A | G | 0.15 | -0.07 | 0.01 | 2.13E-06  |
| CELA3A   | rs17032925  | 2  | 67039351  | C | T | 0.08 | -0.10 | 0.01 | 2.59E-06  |

|        |             |    |           |   |   |      |       |      |           |
|--------|-------------|----|-----------|---|---|------|-------|------|-----------|
| CELA3A | rs3822288   | 4  | 109933388 | T | C | 0.34 | -0.05 | 0.01 | 1.89E-05  |
| CELA3A | rs35479797  | 6  | 32568123  | T | C | 0.53 | -0.06 | 0.01 | 6.60E-06  |
| CELA3A | rs7744847   | 6  | 96086797  | T | G | 0.39 | 0.13  | 0.01 | 3.94E-32  |
| CELA3A | rs112166936 | 6  | 126411994 | C | A | 0.45 | -0.07 | 0.01 | 3.37E-11  |
| CELA3A | rs11778310  | 8  | 18917392  | G | A | 0.29 | 0.07  | 0.01 | 6.75E-09  |
| CELA3A | rs8176747   | 9  | 133255928 | G | C | 0.06 | 0.50  | 0.01 | 8.17E-108 |
| CELA3A | rs56278466  | 10 | 17833858  | G | T | 0.66 | 0.06  | 0.01 | 4.44E-07  |
| CELA3A | rs174578    | 11 | 61838027  | A | T | 0.35 | 0.05  | 0.01 | 2.82E-05  |
| CELA3A | rs74997273  | 11 | 100718017 | T | A | 0.27 | -0.07 | 0.01 | 3.75E-08  |
| CELA3A | rs6575449   | 14 | 94630966  | T | C | 0.18 | -0.11 | 0.01 | 1.20E-14  |
| CELA3A | rs28365941  | 16 | 283138    | C | T | 0.14 | -0.08 | 0.01 | 4.59E-07  |
| CELA3A | rs72802342  | 16 | 75200974  | A | C | 0.08 | -0.26 | 0.01 | 1.75E-34  |
| CELA3A | rs1673931   | 16 | 88910069  | C | T | 0.38 | -0.10 | 0.01 | 4.18E-18  |
| CELA3A | rs681343    | 19 | 48703205  | T | C | 0.51 | 0.20  | 0.01 | 4.09E-74  |
| CEP20  | rs1354034   | 3  | 56815721  | C | T | 0.60 | 0.10  | 0.01 | 2.30E-17  |
| CEP20  | rs342298    | 7  | 106733200 | T | C | 0.46 | -0.06 | 0.01 | 2.00E-06  |
| CEP20  | rs741735    | 11 | 256976    | A | C | 0.24 | 0.06  | 0.01 | 2.81E-06  |
| CEP20  | rs74009487  | 16 | 15872040  | T | C | 0.06 | -0.22 | 0.02 | 4.75E-18  |
| CEP20  | rs200309755 | 17 | 29518756  | T | C | 0.54 | 0.06  | 0.01 | 5.16E-06  |
| CEP43  | rs56279106  | 1  | 180134769 | A | G | 0.28 | 0.07  | 0.01 | 7.85E-08  |
| CEP43  | rs3811444   | 1  | 247876149 | T | C | 0.33 | -0.05 | 0.01 | 1.73E-05  |
| CEP43  | rs2237276   | 6  | 167028627 | T | C | 0.45 | 0.07  | 0.01 | 1.30E-08  |
| CEP43  | rs342293    | 7  | 106731773 | G | C | 0.46 | -0.06 | 0.01 | 2.08E-07  |
| CEP43  | rs6993770   | 8  | 105569300 | T | A | 0.29 | -0.06 | 0.01 | 1.65E-05  |
| CEP43  | rs11170874  | 12 | 54332691  | G | A | 0.33 | 0.06  | 0.01 | 5.19E-07  |
| CEP85  | -           | 1  | 26219616  | A | T | 0.94 | 0.14  | 0.02 | 1.46E-09  |
| CEP85  | rs1354034   | 3  | 56815721  | C | T | 0.60 | 0.12  | 0.01 | 6.52E-25  |
| CEP85  | rs342293    | 7  | 106731773 | G | C | 0.46 | -0.06 | 0.01 | 7.09E-08  |
| CEP85  | rs544626513 | 11 | 180302    | C | G | 0.23 | 0.07  | 0.01 | 4.98E-06  |
| CERT   | rs1354034   | 3  | 56815721  | C | T | 0.60 | 0.09  | 0.01 | 2.66E-13  |
| CERT   | rs10942737  | 5  | 75386988  | C | T | 0.08 | 0.10  | 0.01 | 1.12E-06  |
| CERT   | rs342298    | 7  | 106733200 | T | C | 0.45 | -0.05 | 0.01 | 7.36E-06  |
| CERT   | rs7297265   | 12 | 54325905  | G | A | 0.44 | 0.05  | 0.01 | 6.43E-06  |
| CES1   | rs913257    | 1  | 170552235 | A | G | 0.46 | 0.05  | 0.01 | 1.47E-05  |
| CES1   | rs12144137  | 1  | 224467152 | T | C | 0.04 | 0.12  | 0.02 | 1.55E-05  |
| CES1   | -           | 2  | 20952479  | T | G | 0.22 | 0.08  | 0.01 | 7.59E-10  |
| CES1   | rs1260326   | 2  | 27508073  | C | T | 0.61 | -0.09 | 0.01 | 6.00E-19  |
| CES1   | rs7640956   | 3  | 57648408  | G | A | 0.82 | -0.12 | 0.01 | 2.20E-19  |
| CES1   | rs114082534 | 4  | 118813029 | A | G | 0.06 | 0.13  | 0.01 | 9.53E-09  |
| CES1   | rs13240994  | 7  | 73602532  | C | T | 0.20 | -0.07 | 0.01 | 8.83E-07  |
| CES1   | rs75231243  | 7  | 127482218 | A | G | 0.07 | -0.14 | 0.01 | 1.01E-10  |
| CES1   | rs199922514 | 8  | 9325592   | G | A | 0.91 | -0.16 | 0.01 | 1.83E-19  |
| CES1   | rs112875651 | 8  | 125494452 | A | G | 0.39 | -0.06 | 0.01 | 1.51E-07  |
| CES1   | rs72775768  | 9  | 136430122 | T | C | 0.29 | -0.06 | 0.01 | 7.54E-08  |
| CES1   | rs2393969   | 10 | 63380680  | C | A | 0.47 | -0.06 | 0.01 | 5.65E-09  |
| CES1   | rs10845139  | 12 | 7427058   | A | G | 0.09 | -0.08 | 0.01 | 5.44E-06  |
| CES1   | rs7979473   | 12 | 120982457 | G | A | 0.62 | 0.06  | 0.01 | 2.91E-07  |
| CES1   | rs8018720   | 14 | 39086981  | C | G | 0.82 | -0.06 | 0.01 | 1.46E-05  |
| CES1   | rs147233090 | 15 | 43735849  | T | C | 0.02 | 0.15  | 0.02 | 2.40E-05  |
| CES1   | rs143168962 | 16 | 55815161  | G | T | 0.06 | -1.14 | 0.02 | 0.00E+00  |
| CES1   | rs58542926  | 19 | 19268740  | T | C | 0.08 | 0.18  | 0.01 | 3.72E-20  |
| CES1   | rs7256200   | 19 | 44912678  | T | G | 0.13 | -0.10 | 0.01 | 1.03E-09  |
| CES1   | rs8736      | 19 | 54173495  | T | C | 0.44 | -0.05 | 0.01 | 3.61E-06  |
| CES2   | rs4704834   | 5  | 157016055 | G | A | 0.65 | 0.05  | 0.01 | 1.88E-05  |
| CES2   | -           | 9  | 133263362 | G | A | 0.18 | -0.07 | 0.01 | 5.58E-06  |
| CES2   | rs140461033 | 16 | 66938061  | A | G | 0.00 | -1.07 | 0.06 | 6.51E-31  |

|        |             |    |           |   |   |      |       |      |           |
|--------|-------------|----|-----------|---|---|------|-------|------|-----------|
| CES3   | rs114165349 | 1  | 26695422  | C | G | 0.02 | 0.22  | 0.02 | 6.50E-09  |
| CES3   | rs4340676   | 3  | 57596361  | G | A | 0.82 | -0.13 | 0.01 | 4.30E-20  |
| CES3   | rs73015965  | 6  | 160706469 | G | A | 0.01 | 0.59  | 0.05 | 5.36E-15  |
| CES3   | rs17715183  | 7  | 127555143 | C | G | 0.07 | -0.15 | 0.01 | 3.04E-11  |
| CES3   | rs9987289   | 8  | 9325848   | G | A | 0.91 | -0.18 | 0.01 | 3.86E-21  |
| CES3   | rs4933698   | 10 | 91881345  | A | C | 0.53 | -0.05 | 0.01 | 4.88E-06  |
| CES3   | rs7970695   | 12 | 120985573 | A | G | 0.62 | 0.08  | 0.01 | 4.29E-11  |
| CES3   | rs71647892  | 16 | 66963853  | C | T | 0.01 | -0.85 | 0.03 | 1.42E-63  |
| CES3   | rs11668882  | 19 | 54171328  | C | T | 0.44 | -0.06 | 0.01 | 2.61E-07  |
| CETN2  | rs1354034   | 3  | 56815721  | C | T | 0.60 | 0.09  | 0.01 | 4.93E-13  |
| CETN2  | rs342296    | 7  | 106732457 | A | G | 0.46 | -0.06 | 0.01 | 7.09E-08  |
| CETN2  | rs117564216 | 22 | 31553941  | A | G | 0.02 | -0.25 | 0.03 | 9.33E-08  |
| CFC1   | rs11708067  | 3  | 123346931 | G | A | 0.24 | 0.07  | 0.01 | 2.71E-07  |
| CFC1   | rs6790951   | 3  | 160307499 | T | C | 0.48 | 0.06  | 0.01 | 8.32E-07  |
| CFC1   | rs9265969   | 6  | 31347929  | A | G | 0.16 | -0.08 | 0.01 | 1.95E-06  |
| CFC1   | rs35510806  | 6  | 126357185 | A | T | 0.47 | -0.05 | 0.01 | 2.09E-05  |
| CFC1   | rs2168101   | 11 | 8233861   | A | C | 0.31 | 0.06  | 0.01 | 1.17E-06  |
| CFC1   | rs4502156   | 15 | 62090956  | C | T | 0.44 | 0.07  | 0.01 | 9.65E-09  |
| CFC1   | rs28461437  | 16 | 373813    | G | C | 0.60 | -0.10 | 0.01 | 1.22E-16  |
| CFC1   | rs34931250  | 17 | 68883786  | T | C | 0.06 | 0.11  | 0.02 | 1.17E-05  |
| CGA    | rs9388486   | 6  | 126340008 | C | T | 0.45 | 0.04  | 0.01 | 4.95E-06  |
| CGREF1 | rs2384572   | 2  | 27101883  | T | G | 0.62 | -0.56 | 0.01 | 0.00E+00  |
| CGREF1 | rs183030488 | 6  | 32491390  | C | T | 0.82 | 0.08  | 0.01 | 1.85E-08  |
| CGREF1 | rs782134971 | 9  | 133264504 | G | C | 0.25 | -0.25 | 0.01 | 3.73E-103 |
| CGREF1 | rs12961734  | 18 | 59416739  | A | G | 0.61 | -0.06 | 0.01 | 3.56E-08  |
| CGREF1 | rs492602    | 19 | 48703160  | G | A | 0.51 | -0.28 | 0.01 | 9.41E-167 |
| CHAC2  | rs78694551  | 2  | 53751676  | G | A | 0.27 | -0.15 | 0.01 | 1.65E-31  |
| CHAC2  | rs1671152   | 19 | 55014977  | G | T | 0.84 | 0.07  | 0.01 | 1.60E-05  |
| CHGB   | rs2509902   | 2  | 157658457 | C | T | 0.86 | -0.08 | 0.01 | 3.93E-07  |
| CHGB   | rs13159918  | 5  | 158465724 | A | C | 0.30 | -0.05 | 0.01 | 8.11E-06  |
| CHGB   | rs386705092 | 6  | 116937001 | G | C | 0.32 | -0.08 | 0.01 | 6.13E-12  |
| CHGB   | rs11154902  | 6  | 136980161 | T | C | 0.46 | -0.09 | 0.01 | 4.45E-18  |
| CHGB   | rs17092104  | 8  | 20148043  | C | G | 0.11 | 0.13  | 0.01 | 4.36E-15  |
| CHGB   | rs28688991  | 16 | 20356228  | T | C | 0.19 | -0.06 | 0.01 | 1.83E-06  |
| CHGB   | rs236153    | 20 | 5923248   | G | A | 0.37 | -0.61 | 0.01 | 0.00E+00  |
| CHI3L1 | rs4950928   | 1  | 203186754 | C | G | 0.79 | 0.67  | 0.01 | 0.00E+00  |
| CHI3L1 | rs11127048  | 2  | 27529596  | A | G | 0.62 | -0.06 | 0.01 | 8.51E-08  |
| CHI3L1 | rs1047891   | 2  | 210675783 | A | C | 0.31 | 0.05  | 0.01 | 7.83E-06  |
| CHI3L1 | rs28601761  | 8  | 125487789 | G | C | 0.42 | -0.12 | 0.01 | 1.70E-31  |
| CHI3L1 | rs2464190   | 12 | 120977587 | C | T | 0.41 | 0.05  | 0.01 | 5.76E-07  |
| CHI3L1 | rs339969    | 15 | 60591082  | A | C | 0.62 | -0.06 | 0.01 | 9.34E-08  |
| CHI3L1 | rs62117298  | 19 | 53414810  | C | T | 0.48 | -0.06 | 0.01 | 3.41E-09  |
| CHIT1  | rs872583    | 1  | 203215638 | C | T | 0.20 | -1.09 | 0.01 | 0.00E+00  |
| CHIT1  | rs9272672   | 6  | 32641072  | C | T | 0.32 | -0.05 | 0.01 | 1.19E-07  |
| CHIT1  | rs149291347 | 6  | 122457804 | T | C | 0.54 | -0.04 | 0.01 | 2.54E-05  |
| CHIT1  | rs763913092 | 10 | 62733504  | G | T | 0.41 | 0.10  | 0.01 | 7.88E-32  |
| CHIT1  | rs11048473  | 12 | 26340881  | T | C | 0.27 | 0.04  | 0.01 | 1.69E-05  |
| CHIT1  | rs11057840  | 12 | 124831509 | C | A | 0.14 | 0.08  | 0.01 | 3.07E-11  |
| CHIT1  | rs34743976  | 15 | 85068586  | A | T | 0.28 | -0.05 | 0.01 | 1.78E-07  |
| CHL1   | -           | 1  | 43812246  | G | A | 0.29 | 0.05  | 0.01 | 1.40E-05  |
| CHL1   | rs931679    | 3  | 217842    | A | T | 0.09 | 0.53  | 0.01 | 5.75E-157 |
| CHL1   | rs16846347  | 3  | 98777624  | G | A | 0.16 | 0.12  | 0.01 | 4.01E-13  |
| CHL1   | rs78689694  | 11 | 126364925 | C | G | 0.13 | -0.09 | 0.01 | 3.69E-08  |
| CHL1   | rs1800574   | 12 | 120979061 | T | C | 0.03 | 0.26  | 0.02 | 3.59E-15  |
| CHL1   | rs186021206 | 17 | 7166093   | A | G | 0.01 | 0.72  | 0.05 | 6.12E-22  |
| CHL1   | rs8105767   | 19 | 22032639  | G | A | 0.29 | -0.06 | 0.01 | 6.51E-06  |

|               |             |    |           |   |   |      |       |      |           |
|---------------|-------------|----|-----------|---|---|------|-------|------|-----------|
| CHMP1A        | rs1354034   | 3  | 56815721  | C | T | 0.60 | 0.05  | 0.01 | 2.08E-05  |
| CHMP1A        | rs7080386   | 10 | 63288546  | A | C | 0.41 | 0.06  | 0.01 | 3.63E-06  |
| CHMP1A        | rs460879    | 16 | 89646481  | T | C | 0.43 | -0.09 | 0.01 | 6.29E-16  |
| CHMP1A        | rs892090    | 19 | 55027704  | G | T | 0.83 | 0.07  | 0.01 | 2.57E-05  |
| CHRD1         | rs215225    | 12 | 481379    | G | A | 0.43 | 0.05  | 0.01 | 1.28E-05  |
| CHRD1         | rs777834943 | 16 | 20355409  | T | C | 0.18 | -0.07 | 0.01 | 3.91E-07  |
| CHRD1         | rs186021206 | 17 | 7166093   | A | G | 0.01 | 0.43  | 0.05 | 1.54E-09  |
| CHRD1         | rs1065853   | 19 | 44909976  | T | G | 0.08 | 0.11  | 0.01 | 1.29E-08  |
| CHRD1         | rs2899319   | 22 | 39478309  | C | A | 0.62 | 0.06  | 0.01 | 1.75E-07  |
| CHRD2         | rs9815534   | 3  | 186924486 | G | C | 0.29 | 0.06  | 0.01 | 4.17E-06  |
| CHRD2         | rs574672574 | 11 | 74721142  | A | G | 0.04 | -0.65 | 0.02 | 3.93E-124 |
| CHRD2         | rs6590199   | 11 | 126365772 | A | G | 0.16 | 0.08  | 0.01 | 8.80E-08  |
| CHRD2         | rs138903858 | 14 | 105168150 | T | G | 0.03 | 0.19  | 0.02 | 6.42E-08  |
| CHRD2         | rs200489612 | 17 | 7203059   | A | G | 0.01 | 0.65  | 0.05 | 5.21E-16  |
| CIAPIN1       | rs1354034   | 3  | 56815721  | C | T | 0.60 | 0.07  | 0.01 | 1.23E-09  |
| CIAPIN1       | rs342298    | 7  | 106733200 | T | C | 0.46 | -0.05 | 0.01 | 8.12E-06  |
| CIAPIN1       | rs10733789  | 10 | 63188924  | C | T | 0.31 | 0.05  | 0.01 | 1.55E-05  |
| CIAPIN1       | rs686402    | 16 | 57452701  | T | C | 0.53 | 0.06  | 0.01 | 1.84E-06  |
| CKAP4         | rs61747728  | 1  | 179557079 | T | C | 0.04 | 0.14  | 0.02 | 1.00E-06  |
| CKAP4         | rs2704895   | 12 | 106256210 | A | G | 0.22 | 0.22  | 0.01 | 6.70E-64  |
| CKAP4         | rs28929474  | 14 | 94378610  | T | C | 0.02 | 1.32  | 0.03 | 1.64E-256 |
| CKAP4         | rs28640218  | 16 | 20347945  | T | G | 0.19 | -0.07 | 0.01 | 3.14E-06  |
| CKAP4         | -           | 17 | 66382324  | C | G | 0.03 | 0.15  | 0.02 | 1.94E-05  |
| CKMT1A_CKMT1B | rs700882    | 2  | 101114935 | T | C | 0.15 | 0.07  | 0.01 | 1.05E-05  |
| CKMT1A_CKMT1B | rs10205067  | 2  | 112031804 | G | A | 0.07 | -0.18 | 0.01 | 2.67E-16  |
| CKMT1A_CKMT1B | rs34248556  | 4  | 68488960  | C | T | 0.66 | -0.07 | 0.01 | 2.30E-08  |
| CKMT1A_CKMT1B | rs73082019  | 7  | 24717024  | G | A | 0.10 | -0.09 | 0.01 | 1.33E-06  |
| CKMT1A_CKMT1B | rs6472539   | 8  | 70717575  | C | G | 0.52 | -0.08 | 0.01 | 1.34E-11  |
| CKMT1A_CKMT1B | rs13292932  | 9  | 133270009 | A | C | 0.31 | 0.07  | 0.01 | 1.86E-07  |
| CKMT1A_CKMT1B | -           | 12 | 108287518 | A | G | 0.01 | 0.55  | 0.05 | 4.01E-14  |
| CKMT1A_CKMT1B | rs690604    | 15 | 43542666  | T | G | 0.08 | -0.29 | 0.01 | 2.84E-40  |
| CKMT1A_CKMT1B | rs601338    | 19 | 48703417  | A | G | 0.51 | -0.09 | 0.01 | 9.34E-14  |
| CLC           | rs1186706   | 2  | 61446259  | T | G | 0.49 | -0.05 | 0.01 | 1.61E-05  |
| CLC           | rs548495874 | 2  | 102356207 | T | C | 0.47 | 0.06  | 0.01 | 4.07E-07  |
| CLC           | rs4328821   | 3  | 128597592 | G | A | 0.11 | -0.15 | 0.01 | 2.85E-16  |
| CLC           | rs11242115  | 5  | 132490721 | C | G | 0.39 | -0.06 | 0.01 | 2.41E-08  |
| CLC           | rs448277    | 6  | 29934029  | T | C | 0.29 | -0.06 | 0.01 | 1.33E-06  |
| CLC           | rs7809058   | 7  | 75833202  | T | C | 0.90 | -0.19 | 0.01 | 1.43E-24  |
| CLC           | rs7819099   | 8  | 143918694 | G | A | 0.43 | -0.07 | 0.01 | 6.31E-10  |
| CLC           | -           | 9  | 6152128   | C | A | 0.32 | 0.06  | 0.01 | 2.87E-07  |
| CLC           | rs35350651  | 12 | 111469627 | C | A | 0.50 | -0.05 | 0.01 | 7.29E-06  |
| CLC           | rs34210653  | 17 | 4632019   | A | G | 0.02 | -0.18 | 0.03 | 7.62E-06  |
| CLC           | rs143121234 | 19 | 39735890  | G | C | 0.00 | -1.36 | 0.09 | 2.02E-22  |
| CLC           | rs34436714  | 19 | 53824059  | A | C | 0.21 | 0.14  | 0.01 | 9.88E-24  |
| CLEC10A       | -           | 3  | 161125948 | T | A | 0.47 | 0.05  | 0.01 | 4.20E-06  |
| CLEC10A       | rs781651672 | 4  | 144124141 | T | G | 0.45 | 0.17  | 0.01 | 5.70E-62  |
| CLEC10A       | rs9271300   | 6  | 32613805  | G | C | 0.54 | 0.07  | 0.01 | 6.64E-12  |
| CLEC10A       | rs971481    | 7  | 7203402   | G | C | 0.61 | -0.12 | 0.01 | 1.30E-29  |
| CLEC10A       | rs13294683  | 9  | 79664852  | T | C | 0.10 | 0.20  | 0.01 | 1.83E-32  |
| CLEC10A       | rs2519093   | 9  | 133266456 | T | C | 0.18 | 0.13  | 0.01 | 3.22E-22  |
| CLEC10A       | rs12771902  | 10 | 70242743  | A | G | 0.33 | -0.06 | 0.01 | 7.38E-07  |
| CLEC10A       | rs215223    | 12 | 481093    | A | G | 0.40 | -0.09 | 0.01 | 1.65E-16  |
| CLEC10A       | rs3184504   | 12 | 111446804 | C | T | 0.52 | -0.06 | 0.01 | 1.03E-08  |
| CLEC10A       | -           | 15 | 56986436  | G | A | 0.07 | 0.12  | 0.01 | 2.00E-09  |
| CLEC10A       | rs56156922  | 16 | 56953457  | C | T | 0.33 | 0.06  | 0.01 | 1.57E-07  |
| CLEC10A       | rs90951     | 17 | 7078078   | G | A | 0.33 | 0.54  | 0.01 | 0.00E+00  |

|         |             |    |           |   |   |      |       |      |           |
|---------|-------------|----|-----------|---|---|------|-------|------|-----------|
| CLEC10A | -           | 17 | 59849030  | G | T | 0.45 | -0.09 | 0.01 | 1.46E-16  |
| CLEC10A | rs769669239 | 22 | 42719513  | C | T | 0.47 | -0.06 | 0.01 | 5.39E-10  |
| CLEC11A | rs753568788 | 1  | 205210435 | A | T | 0.45 | -0.05 | 0.01 | 2.35E-05  |
| CLEC11A | rs13063578  | 3  | 47046347  | A | T | 0.40 | -0.07 | 0.01 | 1.03E-09  |
| CLEC11A | rs62525616  | 8  | 129605834 | T | C | 0.57 | -0.06 | 0.01 | 5.54E-07  |
| CLEC11A | rs2282683   | 9  | 76502835  | G | A | 0.21 | -0.07 | 0.01 | 1.74E-07  |
| CLEC11A | rs4981022   | 12 | 103756096 | A | G | 0.68 | 0.07  | 0.01 | 1.05E-08  |
| CLEC11A | rs12050709  | 15 | 50067027  | C | T | 0.24 | -0.06 | 0.01 | 8.00E-06  |
| CLEC11A | rs2179768   | 16 | 490500    | A | G | 0.51 | -0.07 | 0.01 | 6.05E-09  |
| CLEC11A | rs141369989 | 19 | 50723250  | A | G | 0.03 | 0.81  | 0.02 | 4.67E-126 |
| CLEC11A | rs13036464  | 20 | 17685222  | C | G | 0.41 | 0.05  | 0.01 | 1.12E-05  |
| CLEC14A | rs6664906   | 1  | 30881966  | C | T | 0.46 | -0.10 | 0.01 | 4.16E-20  |
| CLEC14A | rs61747728  | 1  | 179557079 | T | C | 0.04 | 0.17  | 0.02 | 3.92E-09  |
| CLEC14A | rs75166367  | 2  | 162107791 | A | G | 0.06 | -0.11 | 0.01 | 2.48E-06  |
| CLEC14A | rs13107325  | 4  | 102267552 | T | C | 0.08 | 0.16  | 0.01 | 3.84E-14  |
| CLEC14A | rs10093     | 6  | 32641396  | G | C | 0.38 | 0.05  | 0.01 | 2.60E-05  |
| CLEC14A | rs507666    | 9  | 133273983 | A | G | 0.18 | -0.34 | 0.01 | 2.04E-131 |
| CLEC14A | rs4842659   | 12 | 89503973  | A | G | 0.71 | -0.09 | 0.01 | 6.73E-14  |
| CLEC14A | -           | 14 | 38496626  | T | A | 0.41 | 0.08  | 0.01 | 5.22E-13  |
| CLEC14A | rs777834943 | 16 | 20355409  | T | C | 0.18 | -0.08 | 0.01 | 7.98E-08  |
| CLEC14A | rs186021206 | 17 | 7166093   | A | G | 0.01 | 0.43  | 0.05 | 7.75E-09  |
| CLEC14A | rs71354106  | 19 | 35838485  | A | G | 0.07 | 0.16  | 0.01 | 1.06E-13  |
| CLEC1A  | rs61747728  | 1  | 179557079 | T | C | 0.04 | 0.12  | 0.02 | 2.69E-05  |
| CLEC1A  | rs7669607   | 4  | 9996177   | C | T | 0.79 | 0.06  | 0.01 | 3.17E-06  |
| CLEC1A  | rs10982156  | 9  | 114325784 | A | T | 0.07 | 0.23  | 0.01 | 5.09E-24  |
| CLEC1A  | rs10901252  | 9  | 133252613 | C | G | 0.06 | 0.78  | 0.02 | 3.25E-253 |
| CLEC1A  | rs7961483   | 12 | 10077861  | T | C | 0.62 | -0.31 | 0.01 | 6.63E-171 |
| CLEC1A  | rs77924615  | 16 | 20381010  | A | G | 0.20 | -0.07 | 0.01 | 7.42E-07  |
| CLEC1A  | rs186021206 | 17 | 7166093   | A | G | 0.01 | 0.45  | 0.05 | 1.32E-09  |
| CLEC1B  | rs3804749   | 3  | 123114156 | T | C | 0.59 | -0.08 | 0.01 | 1.29E-11  |
| CLEC1B  | rs13108400  | 4  | 101873456 | G | A | 0.40 | -0.05 | 0.01 | 2.70E-05  |
| CLEC1B  | rs78947501  | 4  | 153538803 | C | G | 0.03 | 0.15  | 0.02 | 1.04E-05  |
| CLEC1B  | rs17622656  | 5  | 132485305 | A | G | 0.39 | -0.07 | 0.01 | 3.89E-08  |
| CLEC1B  | rs6961069   | 7  | 80589645  | T | C | 0.40 | 0.06  | 0.01 | 1.27E-06  |
| CLEC1B  | rs6993770   | 8  | 105569300 | T | A | 0.29 | -0.13 | 0.01 | 8.51E-25  |
| CLEC1B  | rs7896518   | 10 | 63344740  | G | A | 0.42 | 0.09  | 0.01 | 5.37E-15  |
| CLEC1B  | rs521040    | 12 | 9995251   | C | T | 0.25 | 0.17  | 0.01 | 1.42E-37  |
| CLEC1B  | rs1654425   | 19 | 55027612  | C | T | 0.83 | 0.11  | 0.01 | 1.68E-12  |
| CLEC4A  | rs200688856 | 1  | 161629989 | C | G | 0.34 | 0.13  | 0.01 | 4.80E-30  |
| CLEC4A  | -           | 3  | 196784237 | T | A | 0.50 | -0.05 | 0.01 | 2.67E-05  |
| CLEC4A  | rs791357    | 5  | 173778222 | C | T | 0.72 | -0.06 | 0.01 | 2.15E-06  |
| CLEC4A  | rs1634791   | 6  | 31309000  | G | A | 0.54 | 0.07  | 0.01 | 3.03E-10  |
| CLEC4A  | rs327       | 8  | 19962025  | G | T | 0.27 | 0.05  | 0.01 | 1.22E-05  |
| CLEC4A  | rs11775560  | 8  | 60747604  | G | A | 0.19 | 0.07  | 0.01 | 1.19E-07  |
| CLEC4A  | rs1253387   | 10 | 97273211  | A | G | 0.32 | -0.05 | 0.01 | 4.88E-06  |
| CLEC4A  | rs11603123  | 11 | 126435600 | A | G | 0.03 | 0.47  | 0.02 | 8.36E-58  |
| CLEC4A  | rs117213717 | 12 | 8125599   | A | G | 0.01 | -1.99 | 0.03 | 0.00E+00  |
| CLEC4A  | rs10774624  | 12 | 111395984 | A | G | 0.51 | 0.06  | 0.01 | 3.38E-08  |
| CLEC4A  | rs174418    | 15 | 58395404  | C | T | 0.60 | -0.09 | 0.01 | 4.14E-15  |
| CLEC4A  | rs247617    | 16 | 56956804  | A | C | 0.32 | 0.06  | 0.01 | 2.48E-08  |
| CLEC4A  | rs777152658 | 17 | 40044878  | C | A | 0.40 | -0.05 | 0.01 | 1.45E-05  |
| CLEC4A  | rs6507939   | 18 | 49649891  | C | A | 0.85 | 0.07  | 0.01 | 1.30E-05  |
| CLEC4A  | rs4760      | 19 | 43648948  | G | A | 0.16 | -0.11 | 0.01 | 2.03E-13  |
| CLEC4C  | rs7573683   | 2  | 60353959  | C | T | 0.54 | -0.05 | 0.01 | 8.19E-09  |
| CLEC4C  | rs906579    | 2  | 65374464  | A | T | 0.45 | 0.07  | 0.01 | 9.91E-14  |
| CLEC4C  | rs11899659  | 2  | 98747327  | G | A | 0.41 | 0.04  | 0.01 | 2.19E-06  |

|        |             |    |           |   |   |      |       |      |           |
|--------|-------------|----|-----------|---|---|------|-------|------|-----------|
| CLEC4C | rs1439287   | 2  | 111114320 | A | G | 0.48 | 0.10  | 0.01 | 2.26E-27  |
| CLEC4C | rs7595770   | 2  | 144703297 | T | G | 0.08 | -0.11 | 0.01 | 4.91E-10  |
| CLEC4C | rs7658518   | 4  | 83239126  | A | G | 0.28 | -0.08 | 0.01 | 8.12E-15  |
| CLEC4C | rs1490589   | 4  | 105024619 | G | A | 0.66 | 0.12  | 0.01 | 3.59E-35  |
| CLEC4C | rs11559051  | 5  | 9549829   | G | C | 0.10 | -0.08 | 0.01 | 8.16E-07  |
| CLEC4C | rs4713570   | 6  | 32658263  | T | C | 0.27 | 0.06  | 0.01 | 3.40E-10  |
| CLEC4C | rs74551305  | 6  | 45315926  | C | T | 0.06 | 0.09  | 0.01 | 9.26E-06  |
| CLEC4C | rs2347784   | 7  | 6485212   | G | C | 0.27 | -0.07 | 0.01 | 6.55E-13  |
| CLEC4C | rs876038    | 7  | 50268931  | T | C | 0.32 | -0.21 | 0.01 | 1.38E-104 |
| CLEC4C | rs10107630  | 8  | 129591389 | T | C | 0.57 | 0.06  | 0.01 | 5.67E-12  |
| CLEC4C | rs10971417  | 9  | 33121482  | T | C | 0.25 | -0.06 | 0.01 | 4.07E-08  |
| CLEC4C | rs10441775  | 9  | 91719626  | G | A | 0.69 | 0.05  | 0.01 | 2.31E-06  |
| CLEC4C | rs7873862   | 9  | 113351116 | T | C | 0.19 | 0.08  | 0.01 | 5.49E-12  |
| CLEC4C | rs11789604  | 9  | 136704677 | G | T | 0.45 | 0.04  | 0.01 | 5.99E-06  |
| CLEC4C | rs10838702  | 11 | 47389337  | T | G | 0.39 | 0.06  | 0.01 | 3.09E-09  |
| CLEC4C | rs7129402   | 11 | 121341047 | A | C | 0.72 | -0.14 | 0.01 | 1.58E-41  |
| CLEC4C | rs11055602  | 12 | 7751515   | G | T | 0.41 | 0.85  | 0.01 | 0.00E+00  |
| CLEC4C | -           | 12 | 31494219  | C | T | 0.69 | 0.07  | 0.01 | 2.06E-08  |
| CLEC4C | rs76428106  | 13 | 28029870  | C | T | 0.01 | 0.51  | 0.03 | 2.43E-35  |
| CLEC4C | -           | 16 | 71613731  | A | T | 0.84 | 0.06  | 0.01 | 2.00E-06  |
| CLEC4C | rs7202624   | 16 | 85982569  | C | G | 0.81 | -0.05 | 0.01 | 2.69E-05  |
| CLEC4C | rs62045817  | 16 | 88978825  | T | C | 0.15 | -0.08 | 0.01 | 4.20E-10  |
| CLEC4C | rs62057151  | 17 | 45826476  | T | C | 0.23 | -0.05 | 0.01 | 8.23E-07  |
| CLEC4C | rs4968607   | 17 | 64054970  | A | G | 0.16 | -0.07 | 0.01 | 5.80E-08  |
| CLEC4C | rs9624326   | 22 | 23792856  | T | C | 0.16 | 0.05  | 0.01 | 2.72E-05  |
| CLEC4D | rs3917932   | 1  | 36478315  | G | C | 0.58 | -0.05 | 0.01 | 9.00E-06  |
| CLEC4D | rs2070901   | 1  | 161215268 | T | G | 0.27 | -0.20 | 0.01 | 6.13E-68  |
| CLEC4D | rs6429432   | 1  | 235943941 | C | A | 0.89 | -0.09 | 0.01 | 1.20E-07  |
| CLEC4D | rs149110519 | 6  | 144064640 | T | C | 0.04 | 0.14  | 0.02 | 3.88E-07  |
| CLEC4D | rs2158799   | 7  | 28237488  | G | C | 0.61 | 0.05  | 0.01 | 2.60E-05  |
| CLEC4D | rs445       | 7  | 92779056  | T | C | 0.10 | -0.08 | 0.01 | 6.59E-06  |
| CLEC4D | rs2511241   | 11 | 73234296  | T | C | 0.93 | 0.18  | 0.01 | 1.95E-19  |
| CLEC4D | rs4242896   | 12 | 8536403   | C | A | 0.57 | 0.53  | 0.01 | 0.00E+00  |
| CLEC4D | rs3826331   | 17 | 39994239  | C | T | 0.60 | -0.12 | 0.01 | 1.42E-29  |
| CLEC4D | rs872629    | 19 | 51627385  | A | C | 0.11 | -0.15 | 0.01 | 5.14E-20  |
| CLEC4G | rs10935473  | 3  | 98698056  | T | G | 0.44 | -0.11 | 0.01 | 1.35E-21  |
| CLEC4G | rs35762167  | 3  | 186937196 | C | T | 0.58 | 0.05  | 0.01 | 2.25E-05  |
| CLEC4G | rs371581946 | 6  | 29937723  | A | G | 0.42 | 0.10  | 0.01 | 2.65E-17  |
| CLEC4G | rs7865362   | 9  | 33117967  | T | C | 0.36 | 0.07  | 0.01 | 3.76E-08  |
| CLEC4G | rs505922    | 9  | 133273813 | C | T | 0.32 | 0.29  | 0.01 | 8.07E-133 |
| CLEC4G | -           | 9  | 137109392 | A | G | 0.37 | 0.08  | 0.01 | 6.00E-11  |
| CLEC4G | rs56278466  | 10 | 17833858  | G | T | 0.66 | -0.08 | 0.01 | 1.72E-12  |
| CLEC4G | rs35426769  | 10 | 69485186  | A | G | 0.00 | 0.65  | 0.10 | 1.76E-05  |
| CLEC4G | rs10830278  | 11 | 89483257  | A | T | 0.80 | 0.08  | 0.01 | 1.45E-09  |
| CLEC4G | rs4760254   | 12 | 57372609  | C | G | 0.24 | -0.06 | 0.01 | 4.29E-06  |
| CLEC4G | rs12709103  | 16 | 88646374  | G | A | 0.68 | -0.05 | 0.01 | 6.74E-06  |
| CLEC4G | rs17701598  | 17 | 68324304  | A | G | 0.25 | -0.06 | 0.01 | 3.26E-06  |
| CLEC4G | rs76560987  | 19 | 7734566   | T | C | 0.07 | 0.37  | 0.01 | 8.62E-66  |
| CLEC5A | rs3917932   | 1  | 36478315  | G | C | 0.58 | -0.05 | 0.01 | 1.32E-05  |
| CLEC5A | rs10801568  | 1  | 196822751 | G | T | 0.25 | -0.07 | 0.01 | 6.23E-08  |
| CLEC5A | rs13107325  | 4  | 102267552 | T | C | 0.08 | 0.09  | 0.01 | 7.49E-06  |
| CLEC5A | rs9273113   | 6  | 32644878  | G | A | 0.33 | -0.07 | 0.01 | 5.88E-08  |
| CLEC5A | rs6932623   | 6  | 87231349  | T | C | 0.82 | -0.06 | 0.01 | 2.09E-05  |
| CLEC5A | rs11769630  | 7  | 50218107  | A | T | 0.07 | 0.13  | 0.01 | 7.87E-10  |
| CLEC5A | rs6962383   | 7  | 141961650 | C | A | 0.30 | 0.28  | 0.01 | 3.20E-125 |
| CLEC5A | rs10838702  | 11 | 47389337  | T | G | 0.39 | -0.06 | 0.01 | 3.36E-07  |



|        |             |    |           |   |   |      |       |      |           |
|--------|-------------|----|-----------|---|---|------|-------|------|-----------|
| CLEC5A | rs261334    | 15 | 58434545  | C | G | 0.79 | -0.07 | 0.01 | 1.22E-07  |
| CLEC5A | rs186021206 | 17 | 7166093   | A | G | 0.01 | 0.44  | 0.05 | 2.71E-09  |
| CLEC5A | rs12450688  | 17 | 39987976  | A | G | 0.54 | -0.07 | 0.01 | 1.70E-10  |
| CLEC5A | rs2254448   | 20 | 1570451   | G | C | 0.78 | 0.17  | 0.01 | 2.98E-42  |
| CLEC6A | rs188468174 | 1  | 24965206  | T | C | 0.01 | 0.22  | 0.03 | 2.40E-06  |
| CLEC6A | rs2070901   | 1  | 161215268 | T | G | 0.27 | -0.12 | 0.01 | 1.58E-23  |
| CLEC6A | rs10186921  | 2  | 43417417  | T | C | 0.57 | -0.05 | 0.01 | 9.15E-07  |
| CLEC6A | rs9880192   | 3  | 128578726 | C | G | 0.41 | -0.05 | 0.01 | 7.75E-06  |
| CLEC6A | rs2158799   | 7  | 28237488  | G | C | 0.61 | 0.05  | 0.01 | 1.31E-05  |
| CLEC6A | rs13277237  | 8  | 129592317 | A | G | 0.57 | -0.05 | 0.01 | 9.26E-06  |
| CLEC6A | rs11045427  | 12 | 8453927   | A | C | 0.21 | -0.64 | 0.01 | 0.00E+00  |
| CLEC6A | rs3184504   | 12 | 111446804 | C | T | 0.52 | -0.09 | 0.01 | 1.63E-15  |
| CLEC6A | rs76428106  | 13 | 28029870  | C | T | 0.01 | 0.28  | 0.03 | 1.55E-08  |
| CLEC6A | rs2239630   | 14 | 23120140  | G | A | 0.56 | -0.05 | 0.01 | 1.33E-05  |
| CLEC6A | rs28885693  | 15 | 50986216  | A | G | 0.46 | 0.08  | 0.01 | 5.92E-15  |
| CLEC6A | rs4795412   | 17 | 39994351  | T | C | 0.39 | 0.06  | 0.01 | 1.22E-07  |
| CLEC6A | rs872629    | 19 | 51627385  | A | C | 0.11 | -0.13 | 0.01 | 4.89E-15  |
| CLEC7A | rs2647011   | 6  | 32694138  | A | C | 0.54 | -0.04 | 0.01 | 2.60E-05  |
| CLEC7A | rs16910526  | 12 | 10118488  | C | A | 0.09 | -1.56 | 0.01 | 0.00E+00  |
| CLEC7A | rs3184504   | 12 | 111446804 | C | T | 0.52 | -0.07 | 0.01 | 9.20E-11  |
| CLEC7A | rs1045929   | 17 | 40019173  | T | C | 0.39 | 0.05  | 0.01 | 4.00E-07  |
| CLIP2  | rs117471007 | 7  | 74282158  | T | C | 0.06 | 0.25  | 0.02 | 2.93E-26  |
| CLIP2  | rs6993770   | 8  | 105569300 | T | A | 0.29 | -0.07 | 0.01 | 1.19E-07  |
| CLIP2  | -           | 10 | 63156270  | A | T | 0.49 | 0.05  | 0.01 | 2.39E-05  |
| CLMP   | rs1260326   | 2  | 27508073  | C | T | 0.61 | 0.05  | 0.01 | 1.58E-06  |
| CLMP   | rs73158188  | 7  | 151718147 | T | C | 0.28 | 0.05  | 0.01 | 2.48E-05  |
| CLMP   | rs73017877  | 11 | 123192354 | G | C | 0.55 | 0.33  | 0.01 | 6.35E-221 |
| CLMP   | rs77924615  | 16 | 20381010  | A | G | 0.20 | -0.08 | 0.01 | 4.27E-09  |
| CLPS   | rs376333472 | 2  | 240682394 | A | G | 0.02 | 0.19  | 0.02 | 1.06E-08  |
| CLPS   | rs2766588   | 6  | 35785450  | C | T | 0.61 | 0.55  | 0.01 | 0.00E+00  |
| CLPS   | rs138435015 | 7  | 50964917  | G | C | 0.96 | 0.13  | 0.02 | 4.82E-07  |
| CLPS   | rs2653414   | 8  | 17868560  | A | C | 0.01 | 0.25  | 0.03 | 2.08E-08  |
| CLPS   | rs7015116   | 8  | 128527736 | G | T | 0.14 | -0.07 | 0.01 | 8.53E-07  |
| CLPS   | rs7068821   | 10 | 88291278  | T | G | 0.26 | -0.05 | 0.01 | 3.70E-06  |
| CLPS   | rs2286779   | 10 | 116635040 | C | G | 0.52 | -0.05 | 0.01 | 1.02E-05  |
| CLPS   | rs9652674   | 16 | 75221575  | A | G | 0.69 | 0.09  | 0.01 | 5.62E-17  |
| CLPS   | rs35866622  | 19 | 48714803  | T | C | 0.50 | 0.05  | 0.01 | 6.11E-07  |
| CLSPN  | rs1008982   | 10 | 129647467 | C | T | 0.37 | -0.10 | 0.01 | 1.55E-17  |
| CLSTN1 | rs782134971 | 9  | 133264504 | G | C | 0.25 | -0.06 | 0.01 | 1.01E-05  |
| CLSTN2 | -           | 2  | 20170879  | C | A | 0.48 | -0.05 | 0.01 | 5.41E-06  |
| CLSTN2 | rs41265459  | 3  | 140448648 | A | T | 0.01 | 2.27  | 0.04 | 7.00E-241 |
| CLSTN2 | rs6984305   | 8  | 9320758   | T | A | 0.89 | -0.10 | 0.01 | 4.22E-10  |
| CLSTN2 | rs77542162  | 17 | 69085137  | G | A | 0.02 | 0.20  | 0.02 | 9.45E-09  |
| CLSTN2 | rs329721    | 19 | 53097169  | T | C | 0.34 | -0.09 | 0.01 | 8.12E-14  |
| CLTA   | rs3811444   | 1  | 247876149 | T | C | 0.33 | -0.12 | 0.01 | 2.00E-22  |
| CLUL1  | rs34881159  | 1  | 161620713 | A | T | 0.49 | 0.04  | 0.01 | 1.00E-05  |
| CLUL1  | rs17482753  | 8  | 19975135  | T | G | 0.10 | 0.08  | 0.01 | 9.27E-07  |
| CLUL1  | rs174553    | 11 | 61807686  | G | A | 0.34 | -0.05 | 0.01 | 1.70E-06  |
| CLUL1  | -           | 11 | 116752497 | T | A | 0.86 | 0.07  | 0.01 | 1.10E-06  |
| CLUL1  | rs3751198   | 12 | 103753429 | G | A | 0.60 | 0.05  | 0.01 | 6.84E-07  |
| CLUL1  | rs1601935   | 15 | 58379566  | T | G | 0.66 | -0.05 | 0.01 | 1.71E-06  |
| CLUL1  | rs12149545  | 16 | 56959249  | A | G | 0.32 | 0.07  | 0.01 | 2.06E-13  |
| CLUL1  | rs186021206 | 17 | 7166093   | A | G | 0.01 | 0.34  | 0.04 | 6.16E-08  |
| CLUL1  | rs12957470  | 18 | 591690    | C | G | 0.29 | 0.61  | 0.01 | 0.00E+00  |
| CLUL1  | rs4465830   | 20 | 45956781  | G | A | 0.19 | -0.12 | 0.01 | 3.08E-23  |
| CNDP1  | rs645040    | 3  | 136207780 | T | G | 0.77 | 0.11  | 0.01 | 1.65E-17  |

|       |             |    |           |   |   |      |       |      |           |
|-------|-------------|----|-----------|---|---|------|-------|------|-----------|
| CNDP1 | rs1030431   | 8  | 58399138  | G | A | 0.67 | -0.06 | 0.01 | 1.92E-06  |
| CNDP1 | rs28601761  | 8  | 125487789 | G | C | 0.42 | -0.05 | 0.01 | 1.36E-05  |
| CNDP1 | rs139974673 | 15 | 43735687  | C | T | 0.02 | -0.21 | 0.02 | 2.11E-09  |
| CNDP1 | rs17817077  | 18 | 74542308  | A | G | 0.39 | 0.29  | 0.01 | 3.95E-142 |
| CNDP1 | rs8102710   | 19 | 23687308  | T | G | 0.25 | -0.36 | 0.01 | 2.14E-173 |
| CNDP1 | rs12609475  | 19 | 27279853  | A | C | 0.17 | -0.24 | 0.01 | 2.65E-58  |
| CNDP1 | rs2294915   | 22 | 43945024  | T | C | 0.23 | -0.06 | 0.01 | 4.73E-06  |
| CNPY2 | rs28929474  | 14 | 94378610  | T | C | 0.02 | 0.48  | 0.03 | 2.08E-31  |
| CNPY4 | rs1354034   | 3  | 56815721  | C | T | 0.60 | 0.05  | 0.01 | 2.00E-05  |
| CNPY4 | rs7457787   | 7  | 100180246 | C | A | 0.12 | -0.27 | 0.01 | 1.55E-50  |
| CNPY4 | rs342293    | 7  | 106731773 | G | C | 0.46 | -0.05 | 0.01 | 5.52E-06  |
| CNST  | rs1354034   | 3  | 56815721  | C | T | 0.60 | 0.05  | 0.01 | 1.08E-05  |
| CNST  | rs6993770   | 8  | 105569300 | T | A | 0.29 | -0.05 | 0.01 | 2.14E-05  |
| CNST  | rs7080386   | 10 | 63288546  | A | C | 0.41 | 0.05  | 0.01 | 5.03E-06  |
| CNST  | rs1671152   | 19 | 55014977  | G | T | 0.84 | 0.07  | 0.01 | 1.88E-05  |
| CNTN1 | rs11755689  | 6  | 32618599  | G | A | 0.33 | 0.05  | 0.01 | 2.42E-05  |
| CNTN1 | rs1814170   | 7  | 139109403 | T | A | 0.10 | -0.15 | 0.01 | 2.92E-19  |
| CNTN1 | rs56278466  | 10 | 17833858  | G | T | 0.66 | 0.06  | 0.01 | 3.30E-08  |
| CNTN1 | rs184621187 | 12 | 37785040  | A | G | 0.02 | 0.16  | 0.02 | 2.57E-05  |
| CNTN1 | rs11177623  | 12 | 40653549  | C | T | 0.38 | 0.20  | 0.01 | 1.11E-75  |
| CNTN1 | rs28929474  | 14 | 94378610  | T | C | 0.02 | 0.15  | 0.02 | 2.83E-05  |
| CNTN1 | rs2071916   | 16 | 376476    | C | T | 0.59 | -0.30 | 0.01 | 6.96E-182 |
| CNTN1 | rs186021206 | 17 | 7166093   | A | G | 0.01 | 0.48  | 0.04 | 5.14E-12  |
| CNTN1 | rs573431210 | 17 | 69280242  | G | T | 0.03 | 0.14  | 0.02 | 1.60E-05  |
| CNTN2 | rs2071533   | 1  | 205043070 | G | T | 0.87 | -1.17 | 0.01 | 0.00E+00  |
| CNTN2 | rs1294406   | 6  | 6737504   | G | A | 0.61 | -0.08 | 0.01 | 1.88E-15  |
| CNTN2 | -           | 9  | 133276163 | T | A | 0.19 | -0.07 | 0.01 | 2.44E-09  |
| CNTN2 | rs56278466  | 10 | 17833858  | G | T | 0.66 | 0.10  | 0.01 | 2.95E-25  |
| CNTN2 | rs74612335  | 11 | 126368738 | C | T | 0.13 | -0.08 | 0.01 | 2.86E-08  |
| CNTN2 | rs141826184 | 12 | 57184132  | T | C | 0.00 | 0.31  | 0.04 | 1.08E-05  |
| CNTN2 | rs186021206 | 17 | 7166093   | A | G | 0.01 | 0.45  | 0.04 | 2.69E-12  |
| CNTN3 | rs114165349 | 1  | 26695422  | C | G | 0.02 | 0.26  | 0.02 | 2.10E-14  |
| CNTN3 | rs1063412   | 1  | 172441827 | A | G | 0.56 | 0.05  | 0.01 | 2.77E-07  |
| CNTN3 | rs1260326   | 2  | 27508073  | C | T | 0.61 | -0.08 | 0.01 | 7.18E-16  |
| CNTN3 | rs4677414   | 3  | 74557869  | G | A | 0.93 | -0.51 | 0.01 | 6.08E-138 |
| CNTN3 | rs1154988   | 3  | 136206349 | A | T | 0.77 | -0.08 | 0.01 | 5.21E-11  |
| CNTN3 | rs9270475   | 6  | 32591230  | T | A | 0.25 | -0.05 | 0.01 | 2.49E-05  |
| CNTN3 | rs9471975   | 6  | 42951484  | C | T | 0.58 | -0.05 | 0.01 | 9.44E-06  |
| CNTN3 | rs33951980  | 7  | 73615107  | T | C | 0.13 | -0.12 | 0.01 | 3.05E-14  |
| CNTN3 | rs4921914   | 8  | 18414928  | T | C | 0.78 | 0.07  | 0.01 | 4.83E-09  |
| CNTN3 | -           | 10 | 5214017   | A | T | 0.16 | 0.06  | 0.01 | 1.60E-05  |
| CNTN3 | -           | 10 | 63464698  | C | A | 0.52 | -0.06 | 0.01 | 4.22E-08  |
| CNTN3 | rs11023881  | 11 | 16225154  | A | T | 0.39 | 0.05  | 0.01 | 1.30E-06  |
| CNTN3 | rs36124182  | 12 | 24062000  | G | A | 0.04 | 0.13  | 0.02 | 4.63E-06  |
| CNTN3 | rs139974673 | 15 | 43735687  | C | T | 0.02 | 0.30  | 0.02 | 2.40E-19  |
| CNTN3 | rs144268704 | 15 | 63500022  | G | A | 0.34 | 0.06  | 0.01 | 2.89E-07  |
| CNTN3 | rs540       | 16 | 370907    | C | T | 0.60 | -0.07 | 0.01 | 3.70E-12  |
| CNTN3 | rs11647695  | 16 | 80745434  | C | A | 0.55 | 0.06  | 0.01 | 9.97E-09  |
| CNTN3 | rs34088055  | 16 | 88469262  | T | C | 0.32 | 0.05  | 0.01 | 6.81E-06  |
| CNTN3 | rs34893138  | 17 | 59773402  | T | A | 0.21 | 0.06  | 0.01 | 1.51E-06  |
| CNTN3 | rs77542162  | 17 | 69085137  | G | A | 0.02 | 0.20  | 0.02 | 1.12E-08  |
| CNTN4 | rs163352    | 3  | 3056357   | C | G | 0.81 | -0.31 | 0.01 | 2.90E-106 |
| CNTN4 | rs9860747   | 3  | 186869628 | C | T | 0.84 | -0.07 | 0.01 | 3.90E-06  |
| CNTN4 | rs13133886  | 4  | 16034172  | C | A | 0.78 | -0.08 | 0.01 | 1.59E-09  |
| CNTN4 | rs9270487   | 6  | 32591299  | G | A | 0.34 | -0.05 | 0.01 | 8.04E-06  |
| CNTN4 | rs9987289   | 8  | 9325848   | G | A | 0.91 | -0.09 | 0.01 | 2.15E-06  |

|         |             |    |           |   |   |      |       |      |          |
|---------|-------------|----|-----------|---|---|------|-------|------|----------|
| CNTN4   | rs174528    | 11 | 61776027  | C | T | 0.38 | 0.05  | 0.01 | 2.47E-06 |
| CNTN4   | rs4055121   | 11 | 126362442 | T | C | 0.14 | -0.18 | 0.01 | 2.97E-33 |
| CNTN4   | rs7138520   | 12 | 482012    | G | C | 0.50 | -0.05 | 0.01 | 4.85E-06 |
| CNTN4   | rs186021206 | 17 | 7166093   | A | G | 0.01 | 0.90  | 0.05 | 1.75E-36 |
| CNTN4   | rs2899319   | 22 | 39478309  | C | A | 0.62 | 0.05  | 0.01 | 5.55E-06 |
| CNTN5   | rs780094    | 2  | 27518370  | C | T | 0.62 | 0.04  | 0.01 | 5.23E-06 |
| CNTN5   | rs13133886  | 4  | 16034172  | C | A | 0.78 | -0.13 | 0.01 | 2.32E-29 |
| CNTN5   | rs7769413   | 6  | 32574282  | C | T | 0.80 | 0.07  | 0.01 | 2.93E-07 |
| CNTN5   | rs10993170  | 9  | 94346258  | C | G | 0.04 | 0.23  | 0.02 | 1.03E-22 |
| CNTN5   | rs72767003  | 9  | 125150878 | T | C | 0.15 | -0.06 | 0.01 | 2.20E-06 |
| CNTN5   | rs898776    | 11 | 99218310  | A | G | 0.92 | -0.79 | 0.01 | 0.00E+00 |
| CNTN5   | rs186021206 | 17 | 7166093   | A | G | 0.01 | 0.43  | 0.04 | 3.36E-11 |
| CNTN5   | rs134077    | 22 | 27667264  | G | A | 0.56 | 0.07  | 0.01 | 2.70E-13 |
| CNTNAP2 | rs4665972   | 2  | 27375230  | C | T | 0.61 | 0.05  | 0.01 | 2.40E-05 |
| CNTNAP2 | rs7810370   | 7  | 145668909 | G | A | 0.71 | -0.55 | 0.01 | 0.00E+00 |
| CNTNAP2 | -           | 9  | 133274293 | A | C | 0.18 | -0.08 | 0.01 | 4.36E-08 |
| CNTNAP2 | rs56278466  | 10 | 17833858  | G | T | 0.66 | 0.12  | 0.01 | 1.09E-29 |
| CNTNAP2 | rs1033415   | 22 | 39492769  | G | A | 0.65 | 0.06  | 0.01 | 7.47E-08 |
| COL18A1 | rs780094    | 2  | 27518370  | C | T | 0.62 | -0.06 | 0.01 | 2.89E-08 |
| COL18A1 | rs28817415  | 4  | 76480299  | T | C | 0.46 | 0.06  | 0.01 | 3.79E-08 |
| COL18A1 | -           | 15 | 60595685  | G | A | 0.62 | 0.05  | 0.01 | 2.50E-05 |
| COL18A1 | rs116539064 | 17 | 79022318  | T | C | 0.10 | 0.11  | 0.01 | 5.47E-09 |
| COL18A1 | rs9976834   | 21 | 45477300  | T | C | 0.18 | -0.20 | 0.01 | 7.89E-45 |
| COL1A1  | rs2476601   | 1  | 113834946 | G | A | 0.90 | 0.08  | 0.01 | 1.46E-05 |
| COL1A1  | rs1386625   | 4  | 38359499  | G | A | 0.90 | -0.13 | 0.01 | 1.20E-11 |
| COL1A1  | rs1233396   | 6  | 29579022  | A | G | 0.14 | -0.07 | 0.01 | 1.59E-05 |
| COL1A1  | rs10955915  | 8  | 118951308 | G | A | 0.54 | 0.10  | 0.01 | 5.44E-18 |
| COL1A1  | -           | 9  | 133274293 | A | C | 0.18 | -0.07 | 0.01 | 2.93E-06 |
| COL1A1  | rs58973023  | 13 | 42384997  | T | A | 0.49 | 0.13  | 0.01 | 4.79E-30 |
| COL1A1  | rs12879725  | 14 | 74961545  | T | C | 0.49 | -0.05 | 0.01 | 2.06E-06 |
| COL1A1  | rs117068593 | 14 | 92651884  | T | C | 0.19 | -0.07 | 0.01 | 3.62E-07 |
| COL1A1  | rs2663344   | 17 | 1023119   | C | A | 0.31 | 0.05  | 0.01 | 2.66E-05 |
| COL1A1  | rs147266928 | 17 | 50185845  | C | T | 0.00 | 1.39  | 0.11 | 8.28E-17 |
| COL1A1  | rs146385050 | 17 | 62559897  | A | C | 0.18 | 0.13  | 0.01 | 1.04E-19 |
| COL1A1  | rs884205    | 18 | 62387624  | C | A | 0.75 | -0.06 | 0.01 | 1.76E-06 |
| COL4A1  | rs2498323   | 4  | 3449382   | A | G | 0.10 | -0.14 | 0.01 | 4.17E-15 |
| COL4A1  | rs72793280  | 5  | 132227207 | T | C | 0.46 | 0.05  | 0.01 | 6.44E-06 |
| COL4A1  | rs35493868  | 7  | 73625076  | G | C | 0.20 | 0.07  | 0.01 | 1.36E-07 |
| COL4A1  | rs28600710  | 8  | 54524233  | A | G | 0.21 | 0.08  | 0.01 | 1.63E-09 |
| COL4A1  | -           | 11 | 47263606  | C | T | 0.15 | 0.09  | 0.01 | 2.43E-07 |
| COL4A1  | rs2229357   | 12 | 57449928  | A | G | 0.25 | 0.07  | 0.01 | 1.41E-07 |
| COL4A1  | rs652572    | 13 | 110167110 | G | A | 0.66 | 0.18  | 0.01 | 1.03E-54 |
| COL4A1  | rs116539064 | 17 | 79022318  | T | C | 0.10 | 0.19  | 0.01 | 9.84E-24 |
| COL4A1  | rs12483377  | 21 | 45511195  | A | G | 0.09 | 0.41  | 0.01 | 1.50E-95 |
| COL4A1  | rs738408    | 22 | 43928850  | T | C | 0.22 | 0.07  | 0.01 | 7.98E-08 |
| COL6A3  | rs1050785   | 2  | 237324109 | A | C | 0.60 | 0.09  | 0.01 | 4.76E-16 |
| COL6A3  | rs77924615  | 16 | 20381010  | A | G | 0.20 | -0.06 | 0.01 | 1.22E-05 |
| COL6A3  | rs186021206 | 17 | 7166093   | A | G | 0.01 | 0.40  | 0.05 | 2.23E-07 |
| COL6A3  | rs3088026   | 21 | 46129699  | T | C | 0.09 | -0.11 | 0.01 | 3.05E-08 |
| COL9A1  | rs1800562   | 6  | 26092913  | A | G | 0.08 | 0.11  | 0.01 | 9.74E-08 |
| COL9A1  | rs543674622 | 6  | 70277423  | G | A | 0.00 | 1.53  | 0.08 | 2.12E-40 |
| COL9A1  | rs34072915  | 10 | 4930921   | G | T | 0.12 | -0.10 | 0.01 | 3.97E-09 |
| COL9A1  | rs11831278  | 12 | 23807795  | T | C | 0.16 | 0.09  | 0.01 | 6.65E-09 |
| COLEC12 | rs10265221  | 7  | 151717243 | C | T | 0.29 | 0.05  | 0.01 | 9.02E-06 |
| COLEC12 | rs11606287  | 11 | 47385888  | A | C | 0.36 | -0.05 | 0.01 | 1.69E-06 |
| COLEC12 | rs34262842  | 16 | 20344489  | G | A | 0.17 | -0.07 | 0.01 | 3.99E-07 |

|         |             |    |           |   |   |      |       |      |           |
|---------|-------------|----|-----------|---|---|------|-------|------|-----------|
| COLEC12 | rs149622251 | 18 | 331717    | T | C | 0.01 | -0.86 | 0.05 | 9.12E-36  |
| COMP    | rs4233367   | 1  | 161193247 | C | T | 0.61 | -0.07 | 0.01 | 4.46E-09  |
| COMP    | rs56278466  | 10 | 17833858  | G | T | 0.66 | 0.12  | 0.01 | 2.15E-26  |
| COMP    | rs60648773  | 11 | 126367386 | A | G | 0.23 | -0.07 | 0.01 | 4.37E-07  |
| COMP    | rs7310615   | 12 | 111427245 | G | C | 0.52 | 0.05  | 0.01 | 1.85E-05  |
| COMP    | rs186021206 | 17 | 7166093   | A | G | 0.01 | 0.99  | 0.05 | 6.98E-41  |
| COMP    | rs12974746  | 19 | 18795739  | G | A | 0.03 | -0.58 | 0.02 | 4.09E-69  |
| COMT    | rs1354034   | 3  | 56815721  | C | T | 0.60 | 0.05  | 0.01 | 4.89E-06  |
| COMT    | rs11502185  | 11 | 180258    | C | T | 0.26 | 0.06  | 0.01 | 2.63E-05  |
| COMT    | rs4680      | 22 | 19963748  | A | G | 0.52 | -0.45 | 0.01 | 0.00E+00  |
| CORO1A  | rs342299    | 7  | 106733272 | T | C | 0.46 | -0.06 | 0.01 | 1.81E-07  |
| CORO1A  | rs12292693  | 11 | 65169248  | C | A | 0.26 | -0.08 | 0.01 | 9.30E-09  |
| CORO1A  | rs10432210  | 18 | 25281830  | T | C | 0.21 | 0.06  | 0.01 | 7.70E-06  |
| COX5B   | rs112327139 | 4  | 48857303  | T | C | 0.01 | -0.67 | 0.04 | 1.77E-23  |
| COX5B   | rs201327644 | 4  | 51863747  | T | C | 0.01 | -0.60 | 0.05 | 3.63E-15  |
| COX5B   | rs17569603  | 7  | 44968902  | C | T | 0.17 | 0.07  | 0.01 | 1.52E-05  |
| COX5B   | rs61915365  | 12 | 27725321  | G | C | 0.17 | -0.08 | 0.01 | 1.20E-06  |
| COX5B   | rs6580980   | 12 | 54298277  | G | A | 0.56 | 0.05  | 0.01 | 2.36E-05  |
| CPA1    | rs35004807  | 1  | 50642739  | A | T | 0.34 | 0.07  | 0.01 | 4.33E-08  |
| CPA1    | rs2641348   | 1  | 119895261 | G | A | 0.11 | -0.10 | 0.01 | 9.30E-08  |
| CPA1    | rs200296656 | 4  | 39400322  | T | G | 0.18 | 0.09  | 0.01 | 3.96E-09  |
| CPA1    | rs10014383  | 4  | 109927163 | C | T | 0.34 | -0.05 | 0.01 | 7.06E-06  |
| CPA1    | rs11724862  | 4  | 185651349 | C | T | 0.24 | -0.06 | 0.01 | 1.20E-05  |
| CPA1    | rs56762787  | 5  | 158755183 | C | T | 0.18 | -0.07 | 0.01 | 3.38E-06  |
| CPA1    | rs11759956  | 6  | 7108864   | T | C | 0.55 | 0.06  | 0.01 | 4.75E-07  |
| CPA1    | rs3215532   | 6  | 29554341  | A | G | 0.25 | 0.07  | 0.01 | 1.20E-07  |
| CPA1    | rs373980643 | 6  | 126378465 | G | T | 0.46 | -0.07 | 0.01 | 5.39E-11  |
| CPA1    | rs572393412 | 7  | 117426325 | A | C | 0.31 | 0.07  | 0.01 | 1.03E-07  |
| CPA1    | rs13226219  | 7  | 130379650 | C | T | 0.13 | 0.25  | 0.01 | 6.60E-52  |
| CPA1    | rs4921967   | 8  | 18862119  | T | G | 0.69 | -0.07 | 0.01 | 4.39E-09  |
| CPA1    | rs10901250  | 9  | 133246239 | A | G | 0.12 | 0.09  | 0.01 | 2.59E-07  |
| CPA1    | rs56278466  | 10 | 17833858  | G | T | 0.66 | 0.05  | 0.01 | 9.24E-06  |
| CPA1    | rs28456     | 11 | 61822009  | G | A | 0.31 | 0.07  | 0.01 | 9.14E-10  |
| CPA1    | rs686056    | 11 | 100775958 | A | G | 0.32 | -0.09 | 0.01 | 6.42E-15  |
| CPA1    | rs1492237   | 12 | 52878444  | C | T | 0.66 | -0.06 | 0.01 | 5.46E-07  |
| CPA1    | rs76734539  | 12 | 132531969 | A | G | 0.14 | -0.08 | 0.01 | 1.85E-07  |
| CPA1    | rs72802342  | 16 | 75200974  | A | C | 0.08 | -0.37 | 0.01 | 1.01E-66  |
| CPA1    | rs1673931   | 16 | 88910069  | C | T | 0.38 | -0.11 | 0.01 | 1.26E-22  |
| CPA1    | rs17138478  | 17 | 37713312  | A | C | 0.13 | 0.09  | 0.01 | 2.49E-07  |
| CPA1    | rs8088688   | 18 | 44814416  | T | A | 0.08 | 0.09  | 0.01 | 2.66E-05  |
| CPA1    | rs1698113   | 19 | 48756599  | C | T | 0.48 | 0.06  | 0.01 | 1.52E-06  |
| CPA1    | rs8131986   | 21 | 38087224  | C | A | 0.47 | -0.05 | 0.01 | 2.68E-06  |
| CPA1    | rs80184311  | 22 | 37512603  | C | G | 0.11 | 0.08  | 0.01 | 1.15E-05  |
| CPA2    | rs6952090   | 7  | 130282658 | C | T | 0.35 | -0.37 | 0.01 | 4.23E-209 |
| CPA2    | rs56057779  | 8  | 10659370  | C | G | 0.56 | 0.06  | 0.01 | 6.81E-08  |
| CPA2    | -           | 8  | 75607946  | A | T | 0.13 | -0.07 | 0.01 | 1.67E-05  |
| CPA2    | -           | 9  | 133276163 | T | A | 0.19 | -0.11 | 0.01 | 4.31E-15  |
| CPA2    | rs56278466  | 10 | 17833858  | G | T | 0.66 | 0.08  | 0.01 | 9.88E-13  |
| CPA2    | rs72802342  | 16 | 75200974  | A | C | 0.08 | -0.23 | 0.01 | 3.75E-28  |
| CPB1    | rs333947    | 1  | 109928142 | A | G | 0.15 | -0.08 | 0.01 | 2.49E-06  |
| CPB1    | rs2493413   | 1  | 119956951 | A | G | 0.11 | -0.10 | 0.01 | 8.12E-08  |
| CPB1    | rs17032925  | 2  | 67039351  | C | T | 0.08 | -0.10 | 0.01 | 2.50E-06  |
| CPB1    | rs13318853  | 3  | 148844612 | A | G | 0.24 | 0.13  | 0.01 | 4.21E-22  |
| CPB1    | rs35400735  | 4  | 39445686  | G | T | 0.27 | -0.06 | 0.01 | 1.37E-05  |
| CPB1    | rs3215532   | 6  | 29554341  | A | G | 0.25 | 0.07  | 0.01 | 3.01E-07  |
| CPB1    | rs9482771   | 6  | 127125465 | C | G | 0.50 | 0.07  | 0.01 | 5.09E-11  |

|        |             |    |           |   |   |      |       |      |          |
|--------|-------------|----|-----------|---|---|------|-------|------|----------|
| CPB1   | rs572393412 | 7  | 117426325 | A | C | 0.31 | 0.07  | 0.01 | 1.28E-07 |
| CPB1   | rs4921967   | 8  | 18862119  | T | G | 0.69 | -0.08 | 0.01 | 1.69E-10 |
| CPB1   | -           | 9  | 133263362 | G | A | 0.18 | -0.09 | 0.01 | 3.30E-10 |
| CPB1   | rs56278466  | 10 | 17833858  | G | T | 0.66 | 0.05  | 0.01 | 7.56E-06 |
| CPB1   | rs174548    | 11 | 61803876  | G | C | 0.31 | 0.07  | 0.01 | 3.97E-09 |
| CPB1   | rs686056    | 11 | 100775958 | A | G | 0.32 | -0.09 | 0.01 | 3.77E-14 |
| CPB1   | rs72802342  | 16 | 75200974  | A | C | 0.08 | -0.41 | 0.01 | 1.27E-80 |
| CPB1   | rs1673931   | 16 | 88910069  | C | T | 0.38 | -0.16 | 0.01 | 7.06E-42 |
| CPB1   | rs201566516 | 21 | 38187741  | T | A | 0.45 | -0.06 | 0.01 | 5.68E-07 |
| CPB1   | rs80184311  | 22 | 37512603  | C | G | 0.11 | 0.08  | 0.01 | 8.07E-06 |
| CPE    | rs1550270   | 4  | 165340648 | C | T | 0.30 | 0.26  | 0.01 | 5.77E-95 |
| CPE    | rs3812316   | 7  | 73606007  | G | C | 0.13 | 0.08  | 0.01 | 3.90E-06 |
| CPE    | rs532436    | 9  | 133274414 | A | G | 0.18 | -0.08 | 0.01 | 1.21E-08 |
| CPE    | rs56278466  | 10 | 17833858  | G | T | 0.66 | 0.06  | 0.01 | 1.16E-06 |
| CPE    | rs597808    | 12 | 111535554 | G | A | 0.52 | 0.08  | 0.01 | 2.62E-11 |
| CPE    | rs2393775   | 12 | 120986771 | A | G | 0.62 | 0.10  | 0.01 | 1.85E-17 |
| CPE    | rs9936550   | 16 | 75208952  | T | C | 0.08 | -0.12 | 0.01 | 4.28E-08 |
| CPM    | rs11118611  | 1  | 220817131 | G | A | 0.29 | 0.09  | 0.01 | 1.11E-13 |
| CPM    | rs1862069   | 2  | 169077231 | A | G | 0.54 | -0.05 | 0.01 | 2.77E-06 |
| CPM    | -           | 6  | 24429112  | C | T | 0.00 | -0.74 | 0.06 | 6.26E-18 |
| CPM    | rs28601761  | 8  | 125487789 | G | C | 0.42 | -0.08 | 0.01 | 2.49E-13 |
| CPM    | rs56278466  | 10 | 17833858  | G | T | 0.66 | 0.07  | 0.01 | 9.57E-09 |
| CPM    | rs10751647  | 11 | 306884    | C | T | 0.40 | 0.05  | 0.01 | 7.07E-06 |
| CPM    | rs7978197   | 12 | 68932767  | T | C | 0.01 | -0.47 | 0.03 | 9.24E-24 |
| CPM    | rs174418    | 15 | 58395404  | C | T | 0.60 | 0.07  | 0.01 | 4.33E-11 |
| CPM    | rs200293726 | 16 | 79720543  | T | A | 0.31 | 0.06  | 0.01 | 2.38E-06 |
| CPM    | rs186021206 | 17 | 7166093   | A | G | 0.01 | 0.35  | 0.05 | 4.14E-06 |
| CPM    | rs5112      | 19 | 44927023  | G | C | 0.53 | -0.05 | 0.01 | 1.16E-05 |
| CPM    | rs11668882  | 19 | 54171328  | C | T | 0.44 | 0.05  | 0.01 | 2.04E-06 |
| CPM    | rs777993362 | 20 | 25476413  | G | A | 0.44 | -0.08 | 0.01 | 7.45E-13 |
| CPPED1 | rs2865895   | 16 | 12797425  | G | C | 0.17 | 0.82  | 0.01 | 0.00E+00 |
| CPVL   | rs710446    | 3  | 186742138 | C | T | 0.41 | -0.05 | 0.01 | 2.02E-08 |
| CPVL   | -           | 4  | 186236113 | C | A | 0.51 | -0.08 | 0.01 | 2.14E-18 |
| CPVL   | rs2545801   | 5  | 177414338 | C | T | 0.74 | -0.05 | 0.01 | 5.66E-07 |
| CPVL   | rs6914950   | 6  | 32622587  | T | C | 0.15 | 0.51  | 0.01 | 0.00E+00 |
| CPVL   | rs993632    | 6  | 46118520  | T | C | 0.64 | -0.05 | 0.01 | 1.48E-06 |
| CPVL   | -           | 6  | 159986740 | C | T | 0.33 | 0.08  | 0.01 | 1.97E-13 |
| CPVL   | rs9640023   | 7  | 6505704   | A | G | 0.22 | 0.06  | 0.01 | 8.14E-06 |
| CPVL   | rs34219043  | 7  | 29120988  | T | C | 0.20 | -0.85 | 0.01 | 0.00E+00 |
| CPVL   | -           | 9  | 133263362 | G | A | 0.18 | -0.06 | 0.01 | 6.34E-07 |
| CPVL   | rs56278466  | 10 | 17833858  | G | T | 0.66 | 0.06  | 0.01 | 1.78E-11 |
| CPVL   | rs769611959 | 10 | 89252465  | G | A | 0.30 | 0.08  | 0.01 | 2.48E-13 |
| CPVL   | rs4883201   | 12 | 8929985   | G | A | 0.10 | 0.10  | 0.01 | 1.22E-10 |
| CPVL   | -           | 12 | 101861457 | T | A | 0.38 | 0.06  | 0.01 | 1.54E-09 |
| CPVL   | rs111338191 | 12 | 111388673 | T | A | 0.52 | -0.05 | 0.01 | 4.23E-07 |
| CPVL   | rs145078947 | 14 | 93186629  | T | G | 0.00 | 1.47  | 0.06 | 6.45E-64 |
| CPVL   | rs15951     | 16 | 5025247   | A | G | 0.53 | -0.09 | 0.01 | 2.74E-22 |
| CPVL   | rs186021206 | 17 | 7166093   | A | G | 0.01 | 0.34  | 0.04 | 8.75E-08 |
| CPVL   | rs74181667  | 19 | 12647909  | G | A | 0.37 | 0.06  | 0.01 | 5.24E-09 |
| CPXM1  | rs1434282   | 1  | 199041592 | T | C | 0.73 | -0.08 | 0.01 | 5.27E-11 |
| CPXM1  | rs13412535  | 2  | 224010157 | A | G | 0.23 | -0.06 | 0.01 | 1.36E-05 |
| CPXM1  | rs7618405   | 3  | 18209017  | A | C | 0.20 | -0.06 | 0.01 | 7.80E-06 |
| CPXM1  | rs1354034   | 3  | 56815721  | C | T | 0.60 | -0.07 | 0.01 | 7.26E-09 |
| CPXM1  | rs755492124 | 4  | 101856385 | T | G | 0.39 | -0.06 | 0.01 | 1.01E-06 |
| CPXM1  | -           | 5  | 132328823 | T | A | 0.63 | -0.06 | 0.01 | 6.46E-08 |
| CPXM1  | rs3016013   | 6  | 31383465  | A | G | 0.72 | 0.09  | 0.01 | 2.30E-14 |

|         |             |    |           |   |   |      |       |      |           |
|---------|-------------|----|-----------|---|---|------|-------|------|-----------|
| CPXM1   | rs6961069   | 7  | 80589645  | T | C | 0.40 | 0.05  | 0.01 | 1.49E-06  |
| CPXM1   | rs773148450 | 7  | 100433879 | T | C | 0.18 | -0.07 | 0.01 | 9.05E-06  |
| CPXM1   | rs6993770   | 8  | 105569300 | T | A | 0.29 | -0.16 | 0.01 | 9.13E-42  |
| CPXM1   | rs296849    | 9  | 4780007   | A | T | 0.49 | 0.05  | 0.01 | 6.57E-06  |
| CPXM1   | rs61469632  | 9  | 132986603 | C | T | 0.06 | -0.12 | 0.01 | 3.40E-07  |
| CPXM1   | rs10740118  | 10 | 63341447  | C | G | 0.41 | 0.07  | 0.01 | 1.38E-09  |
| CPXM1   | rs71474568  | 10 | 102589091 | G | T | 0.34 | 0.08  | 0.01 | 1.13E-12  |
| CPXM1   | rs139130389 | 11 | 72139110  | A | C | 0.07 | -0.10 | 0.01 | 9.28E-06  |
| CPXM1   | rs7970830   | 12 | 6173147   | A | G | 0.48 | -0.06 | 0.01 | 2.40E-07  |
| CPXM1   | rs4759076   | 12 | 54336088  | C | T | 0.46 | 0.05  | 0.01 | 6.21E-06  |
| CPXM1   | rs59001897  | 15 | 64868193  | A | T | 0.17 | 0.06  | 0.01 | 1.68E-05  |
| CPXM1   | rs12445050  | 16 | 81837364  | T | C | 0.14 | 0.11  | 0.01 | 8.81E-12  |
| CPXM1   | rs57839578  | 17 | 5365042   | T | A | 0.48 | -0.05 | 0.01 | 4.90E-06  |
| CPXM1   | rs892090    | 19 | 55027704  | G | T | 0.83 | 0.17  | 0.01 | 2.28E-29  |
| CPXM1   | rs215545    | 20 | 2801369   | C | T | 0.76 | 0.36  | 0.01 | 3.89E-166 |
| CPXM1   | rs4814837   | 20 | 19261036  | T | C | 0.34 | 0.07  | 0.01 | 2.55E-08  |
| CPXM1   | rs16989483  | 20 | 44908559  | C | T | 0.27 | -0.06 | 0.01 | 7.82E-06  |
| CR2     | rs4656100   | 1  | 86452261  | C | T | 0.54 | 0.07  | 0.01 | 4.16E-09  |
| CR2     | rs61821111  | 1  | 207422554 | C | T | 0.11 | -0.28 | 0.01 | 8.26E-59  |
| CR2     | rs11585945  | 1  | 214235667 | T | A | 0.60 | 0.07  | 0.01 | 5.04E-11  |
| CR2     | rs78572881  | 2  | 43535820  | C | T | 0.07 | 0.09  | 0.01 | 2.73E-05  |
| CR2     | rs5001409   | 3  | 187017902 | C | A | 0.39 | -0.07 | 0.01 | 1.71E-09  |
| CR2     | -           | 3  | 196745119 | C | T | 0.67 | 0.06  | 0.01 | 3.62E-06  |
| CR2     | rs10012161  | 4  | 177045626 | G | A | 0.82 | -0.09 | 0.01 | 1.99E-10  |
| CR2     | rs1394622   | 5  | 100625360 | T | G | 0.48 | -0.05 | 0.01 | 2.50E-05  |
| CR2     | rs1047437   | 5  | 123350033 | G | C | 0.17 | -0.07 | 0.01 | 5.54E-06  |
| CR2     | rs2760984   | 6  | 32598552  | C | G | 0.18 | -0.18 | 0.01 | 2.45E-37  |
| CR2     | rs9460100   | 6  | 170273934 | C | T | 0.55 | 0.06  | 0.01 | 3.41E-07  |
| CR2     | rs1528149   | 7  | 16067733  | T | C | 0.35 | 0.09  | 0.01 | 1.75E-15  |
| CR2     | rs7798316   | 7  | 47586799  | T | A | 0.43 | 0.05  | 0.01 | 1.07E-05  |
| CR2     | -           | 7  | 50284571  | G | T | 0.32 | 0.07  | 0.01 | 9.79E-09  |
| CR2     | rs11238349  | 7  | 55088378  | A | G | 0.28 | 0.08  | 0.01 | 4.31E-10  |
| CR2     | rs754722538 | 7  | 131198555 | A | C | 0.32 | 0.05  | 0.01 | 8.53E-06  |
| CR2     | rs12554848  | 9  | 36981825  | C | T | 0.27 | -0.06 | 0.01 | 1.51E-06  |
| CR2     | rs4055121   | 11 | 126362442 | T | C | 0.13 | -0.08 | 0.01 | 8.89E-07  |
| CR2     | rs114697502 | 12 | 94283783  | T | C | 0.09 | 0.11  | 0.01 | 3.60E-08  |
| CR2     | rs10774624  | 12 | 111395984 | A | G | 0.51 | -0.07 | 0.01 | 2.78E-10  |
| CR2     | rs3751437   | 13 | 40558943  | G | A | 0.24 | 0.06  | 0.01 | 6.35E-06  |
| CR2     | rs374039502 | 13 | 108308037 | A | T | 0.02 | 0.23  | 0.03 | 2.39E-08  |
| CR2     | rs186021206 | 17 | 7166093   | A | G | 0.01 | 1.02  | 0.05 | 7.47E-42  |
| CR2     | rs34557412  | 17 | 16948873  | G | A | 0.01 | 0.80  | 0.04 | 5.28E-33  |
| CR2     | -           | 17 | 83053396  | T | G | 0.26 | -0.09 | 0.01 | 5.07E-12  |
| CR2     | rs7228151   | 18 | 59514462  | C | T | 0.20 | 0.09  | 0.01 | 4.85E-10  |
| CR2     | rs200437269 | 21 | 35072303  | G | C | 0.11 | 0.09  | 0.01 | 2.92E-06  |
| CR2     | rs35374520  | 22 | 19863626  | G | A | 0.15 | 0.07  | 0.01 | 1.21E-05  |
| CR2     | rs73165110  | 22 | 41895852  | A | G | 0.08 | -0.10 | 0.01 | 1.43E-06  |
| CRACR2A | rs1354034   | 3  | 56815721  | C | T | 0.60 | 0.05  | 0.01 | 3.43E-06  |
| CRACR2A | rs6993770   | 8  | 105569300 | T | A | 0.29 | -0.06 | 0.01 | 4.83E-06  |
| CRACR2A | rs12292693  | 11 | 65169248  | C | A | 0.26 | -0.06 | 0.01 | 2.20E-06  |
| CRACR2A | rs7977865   | 12 | 3791389   | A | G | 0.34 | -0.14 | 0.01 | 5.07E-31  |
| CRADD   | rs1354034   | 3  | 56815721  | C | T | 0.60 | 0.06  | 0.01 | 2.49E-06  |
| CRADD   | rs342293    | 7  | 106731773 | G | C | 0.46 | -0.05 | 0.01 | 7.87E-06  |
| CRADD   | rs7080386   | 10 | 63288546  | A | C | 0.41 | 0.05  | 0.01 | 3.76E-06  |
| CRADD   | rs56944668  | 12 | 93850077  | T | C | 0.16 | -0.10 | 0.01 | 1.36E-09  |
| CRADD   | rs200309755 | 17 | 29518756  | T | C | 0.54 | 0.05  | 0.01 | 2.10E-05  |
| CREG1   | rs7513428   | 1  | 167546035 | C | T | 0.84 | -0.25 | 0.01 | 1.82E-64  |

|        |             |    |           |   |   |      |       |      |           |
|--------|-------------|----|-----------|---|---|------|-------|------|-----------|
| CREG1  | rs687339    | 3  | 136213517 | T | C | 0.77 | 0.07  | 0.01 | 5.59E-08  |
| CREG1  | rs13107325  | 4  | 102267552 | T | C | 0.08 | 0.12  | 0.01 | 2.64E-08  |
| CREG1  | rs77945361  | 4  | 153333382 | A | G | 0.15 | -0.07 | 0.01 | 8.11E-06  |
| CREG1  | rs4594967   | 6  | 130045016 | G | A | 0.68 | 0.06  | 0.01 | 2.45E-07  |
| CREG1  | rs12359178  | 10 | 17847614  | A | G | 0.14 | 0.10  | 0.01 | 2.18E-11  |
| CREG1  | rs35751397  | 10 | 63154256  | A | T | 0.47 | 0.05  | 0.01 | 1.37E-05  |
| CREG1  | rs139130389 | 11 | 72139110  | A | C | 0.07 | -0.11 | 0.01 | 1.25E-07  |
| CREG1  | -           | 12 | 101818376 | C | T | 0.35 | -0.35 | 0.01 | 2.63E-185 |
| CREG1  | rs150641790 | 13 | 41113708  | G | T | 0.07 | 0.11  | 0.01 | 5.02E-07  |
| CREG1  | rs145078947 | 14 | 93186629  | T | G | 0.00 | 1.02  | 0.07 | 7.46E-22  |
| CREG1  | rs58542926  | 19 | 19268740  | T | C | 0.08 | 0.21  | 0.01 | 2.27E-24  |
| CREG1  | rs429358    | 19 | 44908684  | C | T | 0.16 | -0.12 | 0.01 | 1.70E-15  |
| CREG1  | rs3747207   | 22 | 43928975  | A | G | 0.21 | 0.07  | 0.01 | 8.18E-07  |
| CRELD2 | rs1296171   | 1  | 226871905 | G | C | 0.48 | -0.06 | 0.01 | 6.46E-09  |
| CRELD2 | rs9852409   | 3  | 57637814  | A | T | 0.82 | -0.18 | 0.01 | 1.11E-39  |
| CRELD2 | rs3804749   | 3  | 123114156 | T | C | 0.59 | -0.05 | 0.01 | 2.35E-05  |
| CRELD2 | rs6796      | 7  | 6462736   | C | T | 0.28 | 0.08  | 0.01 | 4.71E-12  |
| CRELD2 | rs3752617   | 7  | 127580863 | T | G | 0.07 | -0.15 | 0.01 | 1.93E-11  |
| CRELD2 | rs9987289   | 8  | 9325848   | G | A | 0.91 | -0.17 | 0.01 | 9.85E-20  |
| CRELD2 | rs10488686  | 11 | 32108345  | A | G | 0.37 | 0.06  | 0.01 | 1.20E-06  |
| CRELD2 | -           | 11 | 118549526 | C | T | 0.15 | 0.08  | 0.01 | 6.06E-07  |
| CRELD2 | rs1805214   | 12 | 103847627 | A | G | 0.19 | -0.07 | 0.01 | 4.04E-07  |
| CRELD2 | rs79091287  | 12 | 132839152 | A | G | 0.09 | -0.09 | 0.01 | 5.53E-06  |
| CRELD2 | rs1801689   | 17 | 66214462  | C | A | 0.03 | 0.16  | 0.02 | 8.78E-07  |
| CRELD2 | rs2659005   | 17 | 81244914  | T | C | 0.44 | 0.05  | 0.01 | 5.94E-06  |
| CRELD2 | rs74510325  | 22 | 49921734  | G | C | 0.03 | -0.81 | 0.02 | 1.84E-158 |
| CRH    | rs12740374  | 1  | 109274968 | T | G | 0.22 | -0.11 | 0.01 | 5.36E-16  |
| CRH    | -           | 1  | 234916118 | A | C | 0.06 | -0.11 | 0.02 | 3.56E-06  |
| CRH    | rs10183338  | 2  | 110853239 | T | G | 0.29 | -0.06 | 0.01 | 6.01E-06  |
| CRH    | rs4561605   | 2  | 143514581 | G | C | 0.46 | 0.07  | 0.01 | 2.33E-10  |
| CRH    | rs16840585  | 2  | 156609810 | C | T | 0.21 | -0.06 | 0.01 | 9.33E-06  |
| CRH    | rs13017862  | 2  | 199584865 | C | T | 0.18 | -0.08 | 0.01 | 9.86E-08  |
| CRH    | rs13063578  | 3  | 47046347  | A | T | 0.40 | -0.05 | 0.01 | 1.44E-05  |
| CRH    | rs7687767   | 4  | 56958766  | G | A | 0.18 | 0.08  | 0.01 | 8.41E-09  |
| CRH    | rs749317121 | 4  | 87037992  | A | T | 0.55 | 0.05  | 0.01 | 2.33E-06  |
| CRH    | rs6887216   | 5  | 76915470  | A | T | 0.64 | 0.06  | 0.01 | 2.96E-08  |
| CRH    | rs331700    | 5  | 125490918 | A | G | 0.45 | 0.05  | 0.01 | 1.57E-05  |
| CRH    | rs12518248  | 5  | 173654457 | C | T | 0.42 | 0.06  | 0.01 | 1.86E-07  |
| CRH    | rs9503212   | 6  | 2501301   | G | A | 0.52 | 0.11  | 0.01 | 1.62E-22  |
| CRH    | rs9264839   | 6  | 31303172  | T | C | 0.17 | -0.10 | 0.01 | 4.02E-11  |
| CRH    | rs1229027   | 7  | 38983676  | A | G | 0.24 | -0.09 | 0.01 | 5.66E-12  |
| CRH    | rs111632177 | 7  | 151234719 | A | G | 0.11 | 0.09  | 0.01 | 6.91E-08  |
| CRH    | rs59104426  | 8  | 66260714  | A | T | 0.03 | -0.68 | 0.02 | 1.89E-105 |
| CRH    | rs4263799   | 8  | 71482756  | T | C | 0.48 | 0.16  | 0.01 | 2.12E-47  |
| CRH    | rs7387462   | 8  | 99591682  | T | C | 0.04 | 0.44  | 0.02 | 4.57E-56  |
| CRH    | rs5898348   | 9  | 74386918  | A | G | 0.27 | 0.08  | 0.01 | 7.15E-11  |
| CRH    | rs59585065  | 9  | 105972930 | T | G | 0.71 | 0.09  | 0.01 | 5.63E-13  |
| CRH    | rs941873    | 10 | 79379706  | A | G | 0.46 | -0.07 | 0.01 | 2.57E-09  |
| CRH    | rs12296430  | 12 | 6394334   | C | G | 0.19 | -0.18 | 0.01 | 9.96E-36  |
| CRH    | rs10774624  | 12 | 111395984 | A | G | 0.51 | -0.06 | 0.01 | 4.16E-07  |
| CRH    | rs7192602   | 16 | 78312532  | A | G | 0.30 | -0.06 | 0.01 | 3.01E-06  |
| CRH    | rs7412      | 19 | 44908822  | T | C | 0.08 | 0.10  | 0.01 | 3.68E-06  |
| CRHBP  | rs11162598  | 1  | 79030698  | A | G | 0.36 | 0.05  | 0.01 | 5.70E-06  |
| CRHBP  | rs6798915   | 3  | 194776533 | G | C | 0.30 | 0.06  | 0.01 | 1.01E-06  |
| CRHBP  | rs6896257   | 5  | 76914771  | A | G | 0.64 | -0.59 | 0.01 | 0.00E+00  |
| CRHBP  | rs6924387   | 6  | 136761810 | G | A | 0.41 | -0.06 | 0.01 | 5.61E-08  |

|        |             |    |           |   |   |      |       |      |          |
|--------|-------------|----|-----------|---|---|------|-------|------|----------|
| CRHBP  | rs10104003  | 8  | 54509880  | T | C | 0.21 | 0.15  | 0.01 | 2.26E-31 |
| CRIM1  | rs201258494 | 2  | 36356199  | G | T | 0.19 | -0.15 | 0.01 | 1.37E-27 |
| CRIM1  | rs201147962 | 3  | 58477962  | T | C | 0.61 | 0.06  | 0.01 | 1.35E-06 |
| CRIM1  | rs6474527   | 8  | 39080846  | C | G | 0.65 | -0.10 | 0.01 | 4.22E-18 |
| CRIM1  | rs11244061  | 9  | 133278537 | T | C | 0.12 | -0.10 | 0.01 | 2.66E-08 |
| CRIM1  | rs3751198   | 12 | 103753429 | G | A | 0.60 | 0.06  | 0.01 | 1.06E-06 |
| CRIM1  | -           | 12 | 118073854 | A | G | 0.03 | -0.20 | 0.02 | 2.20E-09 |
| CRIM1  | rs180915454 | 17 | 7288706   | T | C | 0.00 | 0.40  | 0.06 | 1.41E-05 |
| CRIP2  | rs705379    | 7  | 95324583  | A | G | 0.48 | 0.09  | 0.01 | 2.64E-16 |
| CRIP2  | rs495203    | 9  | 133269828 | T | C | 0.32 | 0.07  | 0.01 | 3.27E-10 |
| CRIP2  | rs80324969  | 14 | 105451479 | C | G | 0.17 | 0.19  | 0.01 | 1.04E-34 |
| CRIP2  | rs5817082   | 16 | 56963437  | A | C | 0.27 | 0.06  | 0.01 | 8.80E-06 |
| CRISP2 | rs2288196   | 2  | 151525381 | A | G | 0.62 | -0.07 | 0.01 | 1.28E-14 |
| CRISP2 | rs35303892  | 2  | 207533213 | T | A | 0.20 | -0.08 | 0.01 | 2.94E-15 |
| CRISP2 | rs3087450   | 3  | 127608466 | A | G | 0.01 | -0.16 | 0.02 | 1.04E-05 |
| CRISP2 | -           | 3  | 156685610 | C | T | 0.05 | -0.08 | 0.01 | 2.60E-05 |
| CRISP2 | rs34687149  | 5  | 139617953 | A | T | 0.05 | 0.10  | 0.01 | 2.36E-08 |
| CRISP2 | rs555247    | 6  | 49742392  | A | G | 0.46 | 0.49  | 0.01 | 0.00E+00 |
| CRISP2 | rs7761970   | 6  | 87112185  | T | C | 0.52 | -0.05 | 0.01 | 1.03E-06 |
| CRISP2 | rs6460105   | 7  | 64042314  | C | A | 0.70 | -0.13 | 0.01 | 1.15E-50 |
| CRISP2 | rs58248492  | 8  | 119413313 | T | A | 0.22 | -0.06 | 0.01 | 9.74E-11 |
| CRISP2 | rs10993994  | 10 | 46046326  | C | T | 0.61 | -0.04 | 0.01 | 2.42E-06 |
| CRISP2 | rs569982136 | 10 | 133230887 | T | C | 0.03 | -0.17 | 0.02 | 7.92E-13 |
| CRISP2 | rs1755778   | 14 | 36224785  | G | A | 0.33 | -0.04 | 0.01 | 7.18E-06 |
| CRISP2 | rs7166139   | 15 | 41836657  | C | T | 0.54 | 0.04  | 0.01 | 6.40E-06 |
| CRISP2 | rs1054284   | 19 | 19506144  | G | T | 0.35 | -0.04 | 0.01 | 7.48E-07 |
| CRISP2 | rs145144275 | 19 | 58350442  | G | A | 0.01 | -0.47 | 0.03 | 1.86E-27 |
| CRISP2 | rs4911257   | 20 | 32771768  | C | T | 0.40 | -0.05 | 0.01 | 1.48E-08 |
| CRISP2 | rs753827512 | 20 | 35616633  | C | T | 0.19 | -0.05 | 0.01 | 2.34E-05 |
| CRISP2 | rs67610389  | 21 | 41874711  | A | G | 0.29 | 0.04  | 0.01 | 1.75E-06 |
| CRKL   | rs6993770   | 8  | 105569300 | T | A | 0.29 | -0.07 | 0.01 | 5.54E-08 |
| CRLF1  | rs13402561  | 2  | 3592331   | G | C | 0.82 | 0.06  | 0.01 | 1.22E-05 |
| CRLF1  | rs72538440  | 2  | 64997954  | C | G | 0.42 | -0.05 | 0.01 | 1.36E-05 |
| CRLF1  | rs1486236   | 2  | 179874723 | A | C | 0.37 | 0.05  | 0.01 | 1.27E-05 |
| CRLF1  | rs13017230  | 2  | 226407124 | A | G | 0.19 | -0.07 | 0.01 | 5.05E-06 |
| CRLF1  | -           | 5  | 173336651 | T | A | 0.39 | 0.08  | 0.01 | 3.03E-10 |
| CRLF1  | rs11362821  | 12 | 7514128   | A | G | 0.98 | -0.17 | 0.02 | 3.94E-06 |
| CRLF1  | rs180408    | 12 | 46771540  | G | C | 0.78 | 0.06  | 0.01 | 2.71E-05 |
| CRLF1  | rs10774624  | 12 | 111395984 | A | G | 0.51 | -0.06 | 0.01 | 7.95E-09 |
| CRLF1  | rs1126464   | 16 | 89637957  | C | G | 0.24 | -0.07 | 0.01 | 9.89E-08 |
| CRLF1  | rs12975366  | 19 | 54255498  | C | T | 0.40 | -0.07 | 0.01 | 4.59E-10 |
| CRNN   | rs10494275  | 1  | 152419091 | A | G | 0.07 | -1.18 | 0.01 | 0.00E+00 |
| CRNN   | rs28746795  | 6  | 32664757  | C | T | 0.78 | 0.07  | 0.01 | 5.75E-09 |
| CRNN   | rs582118    | 9  | 133270061 | G | A | 0.32 | 0.06  | 0.01 | 2.12E-07 |
| CRNN   | rs704       | 17 | 28367840  | A | G | 0.47 | 0.09  | 0.01 | 1.16E-19 |
| CRTAC1 | rs1042445   | 3  | 186677647 | T | C | 0.22 | 0.49  | 0.01 | 0.00E+00 |
| CRTAC1 | rs56007204  | 10 | 97865562  | T | C | 0.21 | -0.77 | 0.01 | 0.00E+00 |
| CRTAM  | rs13401811  | 2  | 110858527 | A | G | 0.18 | -0.07 | 0.01 | 1.01E-06 |
| CRTAM  | rs1047891   | 2  | 210675783 | A | C | 0.31 | 0.06  | 0.01 | 3.81E-07 |
| CRTAM  | rs13063578  | 3  | 47046347  | A | T | 0.40 | -0.10 | 0.01 | 2.80E-20 |
| CRTAM  | rs35829610  | 5  | 132488170 | G | C | 0.34 | -0.06 | 0.01 | 3.06E-07 |
| CRTAM  | rs9267084   | 6  | 31441828  | A | G | 0.15 | 0.13  | 0.01 | 7.10E-17 |
| CRTAM  | rs2327832   | 6  | 137651931 | G | A | 0.22 | 0.06  | 0.01 | 8.76E-06 |
| CRTAM  | rs10982456  | 9  | 114928478 | C | T | 0.43 | -0.05 | 0.01 | 3.62E-06 |
| CRTAM  | rs41290291  | 10 | 7732354   | C | T | 0.01 | 0.31  | 0.05 | 2.15E-05 |
| CRTAM  | rs11215416  | 11 | 115206607 | G | A | 0.26 | -0.07 | 0.01 | 1.87E-07 |



|        |             |    |           |   |   |      |       |      |           |
|--------|-------------|----|-----------|---|---|------|-------|------|-----------|
| CRTAM  | rs2370794   | 11 | 122844074 | G | A | 0.34 | 0.31  | 0.01 | 2.41E-157 |
| CRTAM  | rs3184504   | 12 | 111446804 | C | T | 0.52 | -0.09 | 0.01 | 4.64E-16  |
| CRTAM  | -           | 16 | 28610251  | G | T | 0.34 | 0.06  | 0.01 | 7.66E-07  |
| CRTAM  | rs396742    | 16 | 89701648  | G | C | 0.42 | 0.05  | 0.01 | 1.44E-05  |
| CRTAM  | rs186021206 | 17 | 7166093   | A | G | 0.01 | 0.63  | 0.05 | 1.64E-17  |
| CRTAM  | rs2725405   | 17 | 81246424  | C | G | 0.44 | 0.05  | 0.01 | 7.70E-06  |
| CSF1   | rs11577194  | 1  | 109957553 | C | T | 0.52 | -0.18 | 0.01 | 8.58E-61  |
| CSF1   | rs17315646  | 1  | 230159560 | G | C | 0.61 | 0.06  | 0.01 | 7.66E-08  |
| CSF1   | rs3132455   | 6  | 31520177  | C | G | 0.35 | 0.06  | 0.01 | 1.09E-06  |
| CSF1   | rs149044215 | 16 | 89638692  | A | G | 0.37 | 0.06  | 0.01 | 3.85E-06  |
| CSF2RA | rs200489612 | 17 | 7203059   | A | G | 0.01 | 0.56  | 0.06 | 1.22E-10  |
| CSF3   | rs3917932   | 1  | 36478315  | G | C | 0.58 | -0.18 | 0.01 | 3.69E-54  |
| CSF3   | rs56388170  | 7  | 28684757  | T | G | 0.29 | -0.06 | 0.01 | 5.05E-07  |
| CSF3   | rs14408     | 11 | 308314    | C | T | 0.37 | -0.07 | 0.01 | 8.14E-09  |
| CSF3   | rs748908389 | 17 | 39973272  | T | C | 0.47 | 0.08  | 0.01 | 2.14E-11  |
| CST3   | rs13146355  | 4  | 76490987  | A | G | 0.46 | 0.06  | 0.01 | 1.49E-09  |
| CST3   | rs13230509  | 7  | 1246556   | C | G | 0.69 | 0.05  | 0.01 | 2.80E-05  |
| CST3   | rs6464165   | 7  | 151716038 | C | T | 0.28 | 0.05  | 0.01 | 8.50E-06  |
| CST3   | rs7137828   | 12 | 111494996 | T | C | 0.52 | -0.05 | 0.01 | 4.39E-06  |
| CST3   | rs77924615  | 16 | 20381010  | A | G | 0.20 | -0.06 | 0.01 | 2.68E-06  |
| CST3   | rs911119    | 20 | 23632100  | T | C | 0.78 | 0.33  | 0.01 | 2.06E-144 |
| CST5   | rs72694438  | 1  | 103822256 | A | G | 0.21 | -0.05 | 0.01 | 9.54E-06  |
| CST5   | rs4950775   | 1  | 202223295 | T | C | 0.42 | -0.05 | 0.01 | 8.93E-08  |
| CST5   | rs6540740   | 1  | 206965124 | T | A | 0.45 | 0.06  | 0.01 | 6.72E-10  |
| CST5   | rs2576233   | 1  | 216818590 | T | G | 0.24 | 0.05  | 0.01 | 4.12E-06  |
| CST5   | rs3820640   | 1  | 226681217 | C | T | 0.16 | 0.05  | 0.01 | 2.63E-05  |
| CST5   | rs7428376   | 3  | 18816320  | C | T | 0.23 | -0.05 | 0.01 | 7.00E-06  |
| CST5   | rs2970871   | 4  | 23888959  | C | T | 0.56 | 0.05  | 0.01 | 1.86E-08  |
| CST5   | rs4976271   | 5  | 135175676 | T | G | 0.60 | -0.07 | 0.01 | 3.31E-12  |
| CST5   | rs745377    | 11 | 34836866  | T | G | 0.52 | 0.05  | 0.01 | 1.69E-08  |
| CST5   | rs11054082  | 12 | 10952211  | C | G | 0.25 | -0.18 | 0.01 | 4.60E-67  |
| CST5   | rs67020211  | 15 | 63347445  | G | T | 0.55 | -0.05 | 0.01 | 6.30E-09  |
| CST5   | -           | 17 | 55261443  | T | A | 0.15 | -0.06 | 0.01 | 1.20E-05  |
| CST5   | rs601338    | 19 | 48703417  | A | G | 0.51 | 0.10  | 0.01 | 1.16E-26  |
| CST5   | rs1799841   | 20 | 23879541  | G | A | 0.44 | 0.73  | 0.01 | 0.00E+00  |
| CST5   | rs545804263 | 20 | 31567324  | T | C | 0.01 | 0.33  | 0.04 | 1.77E-06  |
| CST6   | rs80293268  | 1  | 8147519   | C | G | 0.05 | -0.39 | 0.02 | 7.24E-50  |
| CST6   | rs2990223   | 1  | 155215184 | G | A | 0.61 | -0.05 | 0.01 | 1.04E-05  |
| CST6   | rs28635651  | 1  | 218683160 | G | A | 0.33 | 0.07  | 0.01 | 3.08E-08  |
| CST6   | rs1260326   | 2  | 27508073  | C | T | 0.61 | 0.06  | 0.01 | 1.43E-07  |
| CST6   | rs13015258  | 2  | 162074215 | G | T | 0.62 | 0.06  | 0.01 | 1.32E-06  |
| CST6   | rs121908120 | 2  | 218890289 | A | T | 0.03 | -0.19 | 0.02 | 2.81E-08  |
| CST6   | rs833270    | 3  | 181802378 | C | T | 0.62 | 0.05  | 0.01 | 2.20E-05  |
| CST6   | rs776694658 | 4  | 74459648  | C | A | 0.38 | 0.06  | 0.01 | 4.36E-06  |
| CST6   | rs75680898  | 4  | 106865391 | G | A | 0.14 | 0.07  | 0.01 | 9.63E-06  |
| CST6   | rs114964313 | 5  | 79137749  | A | G | 0.32 | 0.06  | 0.01 | 1.11E-06  |
| CST6   | rs155942    | 5  | 140152953 | C | T | 0.70 | -0.06 | 0.01 | 1.23E-06  |
| CST6   | rs7905367   | 10 | 52574893  | C | G | 0.80 | 0.09  | 0.01 | 1.28E-10  |
| CST6   | rs4141614   | 10 | 62854095  | A | C | 0.60 | -0.05 | 0.01 | 2.55E-06  |
| CST6   | rs12576095  | 11 | 66008834  | A | G | 0.02 | 0.59  | 0.02 | 9.01E-63  |
| CST6   | rs36034702  | 15 | 90191395  | T | C | 0.17 | -0.11 | 0.01 | 1.50E-13  |
| CST6   | rs4997081   | 16 | 20353912  | C | G | 0.19 | -0.06 | 0.01 | 1.35E-05  |
| CST7   | rs114694170 | 5  | 88884379  | C | T | 0.06 | 0.11  | 0.01 | 4.77E-09  |
| CST7   | -           | 6  | 31448099  | T | G | 0.30 | 0.05  | 0.01 | 7.08E-07  |
| CST7   | rs6993770   | 8  | 105569300 | T | A | 0.29 | -0.15 | 0.01 | 1.38E-53  |
| CST7   | rs774510679 | 10 | 63304076  | A | C | 0.41 | -0.06 | 0.01 | 2.06E-12  |

|       |             |    |           |   |   |      |       |      |           |
|-------|-------------|----|-----------|---|---|------|-------|------|-----------|
| CST7  | rs113422568 | 10 | 102578181 | A | G | 0.33 | 0.09  | 0.01 | 7.35E-20  |
| CST7  | rs2511241   | 11 | 73234296  | T | C | 0.93 | 0.09  | 0.01 | 5.11E-07  |
| CST7  | rs35979828  | 12 | 54292096  | T | C | 0.07 | -0.09 | 0.01 | 4.53E-07  |
| CST7  | rs117566084 | 12 | 101796743 | T | C | 0.01 | 0.30  | 0.03 | 5.54E-11  |
| CST7  | rs3184504   | 12 | 111446804 | C | T | 0.52 | -0.07 | 0.01 | 1.74E-14  |
| CST7  | rs145078947 | 14 | 93186629  | T | G | 0.00 | 0.43  | 0.06 | 9.35E-07  |
| CST7  | rs729116    | 16 | 85382505  | G | C | 0.88 | -0.08 | 0.01 | 1.27E-09  |
| CST7  | rs7208815   | 17 | 40012462  | T | C | 0.39 | 0.08  | 0.01 | 3.13E-17  |
| CST7  | rs227651    | 20 | 24949198  | G | A | 0.23 | -0.83 | 0.01 | 0.00E+00  |
| CST7  | rs574174001 | 20 | 30338973  | T | C | 0.01 | 1.45  | 0.05 | 2.44E-81  |
| CSTB  | -           | 21 | 43776442  | C | G | 0.30 | -0.81 | 0.01 | 0.00E+00  |
| CTF1  | rs342298    | 7  | 106733200 | T | C | 0.46 | -0.05 | 0.01 | 8.01E-06  |
| CTF1  | rs774510679 | 10 | 63304076  | A | C | 0.41 | 0.05  | 0.01 | 2.52E-05  |
| CTF1  | rs11170874  | 12 | 54332691  | G | A | 0.33 | 0.05  | 0.01 | 2.11E-05  |
| CTF1  | -           | 16 | 30989405  | T | C | 0.62 | 0.05  | 0.01 | 1.24E-05  |
| CTRB1 | rs2493413   | 1  | 119956951 | A | G | 0.11 | -0.07 | 0.01 | 2.73E-05  |
| CTRB1 | rs11759956  | 6  | 7108864   | T | C | 0.55 | 0.05  | 0.01 | 3.05E-06  |
| CTRB1 | rs3132568   | 6  | 31134140  | G | A | 0.26 | -0.05 | 0.01 | 1.25E-05  |
| CTRB1 | rs7766106   | 6  | 127133993 | T | C | 0.50 | 0.07  | 0.01 | 3.90E-12  |
| CTRB1 | rs2329566   | 7  | 50949958  | A | G | 0.95 | 0.15  | 0.02 | 3.51E-09  |
| CTRB1 | rs6666      | 7  | 142752462 | C | T | 0.58 | -0.05 | 0.01 | 5.91E-07  |
| CTRB1 | rs4921967   | 8  | 18862119  | T | G | 0.69 | -0.07 | 0.01 | 1.19E-09  |
| CTRB1 | rs2519093   | 9  | 133266456 | T | C | 0.18 | -0.10 | 0.01 | 2.45E-13  |
| CTRB1 | rs174549    | 11 | 61803910  | A | G | 0.31 | 0.07  | 0.01 | 4.70E-09  |
| CTRB1 | rs61910508  | 11 | 100748595 | T | G | 0.29 | -0.06 | 0.01 | 1.51E-06  |
| CTRB1 | rs8051363   | 16 | 75221319  | G | A | 0.71 | 0.57  | 0.01 | 0.00E+00  |
| CTRB1 | rs1126464   | 16 | 89637957  | C | G | 0.24 | -0.09 | 0.01 | 1.69E-10  |
| CTRB1 | rs17138478  | 17 | 37713312  | A | C | 0.13 | 0.07  | 0.01 | 3.36E-06  |
| CTRC  | rs497078    | 1  | 15440540  | T | C | 0.10 | -0.56 | 0.01 | 6.78E-218 |
| CTRC  | -           | 1  | 50576832  | C | T | 0.45 | 0.05  | 0.01 | 1.98E-05  |
| CTRC  | -           | 6  | 31768138  | T | A | 0.12 | -0.09 | 0.01 | 6.42E-07  |
| CTRC  | rs6571015   | 6  | 96086602  | A | G | 0.79 | 0.20  | 0.01 | 1.01E-55  |
| CTRC  | rs112166936 | 6  | 126411994 | C | A | 0.45 | -0.08 | 0.01 | 2.09E-13  |
| CTRC  | rs11778310  | 8  | 18917392  | G | A | 0.29 | 0.06  | 0.01 | 1.28E-07  |
| CTRC  | rs8176743   | 9  | 133256028 | T | C | 0.06 | 0.88  | 0.01 | 0.00E+00  |
| CTRC  | rs56278466  | 10 | 17833858  | G | T | 0.66 | 0.06  | 0.01 | 2.34E-07  |
| CTRC  | rs9581943   | 13 | 27919860  | A | G | 0.40 | 0.05  | 0.01 | 8.48E-06  |
| CTRC  | rs35775091  | 14 | 20807826  | A | G | 0.27 | 0.06  | 0.01 | 3.77E-07  |
| CTRC  | rs72802342  | 16 | 75200974  | A | C | 0.08 | -0.24 | 0.01 | 6.64E-32  |
| CTRC  | rs529900    | 16 | 88910560  | C | G | 0.38 | -0.10 | 0.01 | 3.42E-19  |
| CTRC  | rs200489612 | 17 | 7203059   | A | G | 0.01 | 0.52  | 0.05 | 2.28E-11  |
| CTRC  | rs485186    | 19 | 48703949  | G | A | 0.54 | 0.11  | 0.01 | 6.89E-26  |
| CTRC  | -           | 20 | 50218801  | T | C | 0.47 | -0.05 | 0.01 | 9.12E-06  |
| CTRC  | rs530223046 | 22 | 28851606  | T | A | 0.13 | -0.08 | 0.01 | 2.59E-06  |
| CTSB  | rs4713570   | 6  | 32658263  | T | C | 0.27 | 0.07  | 0.01 | 1.25E-08  |
| CTSB  | rs709821    | 8  | 11845085  | C | G | 0.26 | 0.59  | 0.01 | 0.00E+00  |
| CTSB  | rs10740131  | 10 | 63511728  | T | A | 0.47 | 0.05  | 0.01 | 7.14E-06  |
| CTSB  | rs41281340  | 10 | 71811862  | G | C | 0.09 | -0.12 | 0.01 | 2.63E-11  |
| CTSB  | rs10860794  | 12 | 101823942 | A | C | 0.29 | -0.09 | 0.01 | 3.84E-14  |
| CTSB  | rs145078947 | 14 | 93186629  | T | G | 0.00 | 0.51  | 0.07 | 1.27E-06  |
| CTSB  | rs8107974   | 19 | 19277691  | T | A | 0.08 | 0.13  | 0.01 | 8.83E-11  |
| CTSC  | -           | 4  | 99140866  | C | A | 0.67 | -0.05 | 0.01 | 1.25E-06  |
| CTSC  | rs2854275   | 6  | 32660651  | A | C | 0.15 | 0.12  | 0.01 | 7.18E-19  |
| CTSC  | rs9457800   | 6  | 159990715 | T | C | 0.13 | -0.07 | 0.01 | 1.23E-06  |
| CTSC  | rs10822143  | 10 | 63128096  | T | C | 0.50 | 0.05  | 0.01 | 2.29E-06  |
| CTSC  | rs11600158  | 11 | 88337746  | G | A | 0.10 | 0.98  | 0.01 | 0.00E+00  |

|      |             |    |           |   |   |      |       |      |           |
|------|-------------|----|-----------|---|---|------|-------|------|-----------|
| CTSC | rs4764823   | 12 | 101825988 | A | G | 0.29 | -0.15 | 0.01 | 5.78E-46  |
| CTSC | rs145078947 | 14 | 93186629  | T | G | 0.00 | 0.85  | 0.06 | 7.00E-21  |
| CTSC | rs139974673 | 15 | 43735687  | C | T | 0.02 | 0.13  | 0.02 | 2.22E-05  |
| CTSD | rs2298632   | 1  | 23383982  | T | C | 0.50 | -0.05 | 0.01 | 8.93E-06  |
| CTSD | rs1260326   | 2  | 27508073  | C | T | 0.61 | -0.07 | 0.01 | 1.74E-09  |
| CTSD | rs55861089  | 11 | 1762527   | G | A | 0.10 | -0.50 | 0.01 | 4.93E-165 |
| CTSD | rs10778152  | 12 | 101831973 | G | A | 0.29 | -0.16 | 0.01 | 1.23E-37  |
| CTSD | rs145078947 | 14 | 93186629  | T | G | 0.00 | 0.52  | 0.07 | 2.12E-06  |
| CTSD | rs58542926  | 19 | 19268740  | T | C | 0.08 | 0.10  | 0.01 | 2.32E-06  |
| CTSF | rs143480126 | 1  | 117553065 | A | C | 0.70 | 0.06  | 0.01 | 8.37E-06  |
| CTSF | rs1260326   | 2  | 27508073  | C | T | 0.61 | -0.10 | 0.01 | 4.84E-20  |
| CTSF | rs370542983 | 2  | 241333621 | A | T | 0.35 | -0.06 | 0.01 | 1.80E-06  |
| CTSF | rs187325356 | 4  | 109345757 | A | T | 0.01 | 0.33  | 0.04 | 5.32E-07  |
| CTSF | rs6818519   | 4  | 118866665 | T | G | 0.06 | -0.17 | 0.01 | 1.65E-14  |
| CTSF | rs41280463  | 4  | 153270074 | A | G | 0.17 | -0.07 | 0.01 | 5.63E-06  |
| CTSF | -           | 7  | 28129126  | G | T | 0.21 | 0.06  | 0.01 | 1.22E-05  |
| CTSF | rs17145750  | 7  | 73612048  | T | C | 0.16 | -0.07 | 0.01 | 8.65E-07  |
| CTSF | rs2001945   | 8  | 125465736 | C | G | 0.52 | -0.05 | 0.01 | 4.38E-06  |
| CTSF | rs174567    | 11 | 61825533  | G | A | 0.35 | -0.06 | 0.01 | 5.48E-07  |
| CTSF | rs1044522   | 11 | 66568361  | A | G | 0.24 | 0.21  | 0.01 | 1.95E-64  |
| CTSF | rs116309149 | 11 | 72139545  | A | G | 0.03 | -0.15 | 0.02 | 1.83E-05  |
| CTSF | rs10128858  | 12 | 101827588 | G | A | 0.29 | -0.28 | 0.01 | 6.01E-118 |
| CTSF | rs2393791   | 12 | 120986153 | T | C | 0.62 | -0.06 | 0.01 | 4.24E-07  |
| CTSF | rs554288187 | 14 | 39253644  | A | G | 0.45 | 0.05  | 0.01 | 2.53E-06  |
| CTSF | rs145078947 | 14 | 93186629  | T | G | 0.00 | 0.76  | 0.07 | 8.58E-13  |
| CTSF | rs139974673 | 15 | 43735687  | C | T | 0.02 | 0.25  | 0.02 | 2.80E-12  |
| CTSF | rs429358    | 19 | 44908684  | C | T | 0.16 | -0.08 | 0.01 | 6.59E-07  |
| CTSH | rs4764822   | 12 | 101822895 | T | C | 0.29 | -0.09 | 0.01 | 1.19E-31  |
| CTSH | rs60250730  | 15 | 78945802  | G | C | 0.17 | 1.15  | 0.01 | 0.00E+00  |
| CTSL | rs5030044   | 3  | 186731333 | G | A | 0.11 | -0.09 | 0.01 | 2.57E-07  |
| CTSL | rs3129938   | 6  | 32368718  | A | T | 0.83 | -0.08 | 0.01 | 3.43E-08  |
| CTSL | rs9497576   | 6  | 146604540 | T | G | 0.07 | 0.10  | 0.01 | 1.20E-06  |
| CTSL | rs17151689  | 7  | 77321369  | A | C | 0.05 | -0.13 | 0.02 | 1.30E-06  |
| CTSL | rs2282240   | 9  | 27572636  | T | C | 0.25 | 0.09  | 0.01 | 5.43E-12  |
| CTSL | rs3118869   | 9  | 87725948  | A | C | 0.44 | -0.15 | 0.01 | 1.06E-40  |
| CTSL | rs150370599 | 11 | 60951320  | T | C | 0.08 | 0.21  | 0.01 | 1.80E-25  |
| CTSL | rs76904798  | 12 | 40220632  | T | C | 0.14 | 0.11  | 0.01 | 1.26E-11  |
| CTSL | rs10846744  | 12 | 124827879 | C | G | 0.14 | 0.07  | 0.01 | 4.47E-06  |
| CTSL | rs9604045   | 13 | 113272893 | T | G | 0.25 | 0.06  | 0.01 | 2.35E-05  |
| CTSL | rs72695000  | 14 | 94638408  | T | C | 0.18 | -0.10 | 0.01 | 4.97E-13  |
| CTSL | rs10644230  | 14 | 103144061 | G | A | 0.80 | 0.06  | 0.01 | 2.30E-05  |
| CTSL | rs9901675   | 17 | 7581494   | A | G | 0.05 | -0.14 | 0.02 | 8.09E-08  |
| CTSL | rs77733715  | 19 | 3537186   | G | A | 0.01 | 0.29  | 0.04 | 9.69E-07  |
| CTSL | rs10469365  | 19 | 12621060  | G | A | 0.11 | -0.14 | 0.01 | 1.38E-15  |
| CTSL | rs4808758   | 19 | 18180479  | G | A | 0.22 | 0.16  | 0.01 | 2.44E-32  |
| CTSL | rs1065853   | 19 | 44909976  | T | G | 0.08 | 0.10  | 0.01 | 2.57E-06  |
| CTSL | rs121434529 | 22 | 42061052  | T | C | 0.01 | 0.40  | 0.05 | 2.93E-07  |
| CTSO | rs583104    | 1  | 109278685 | T | G | 0.77 | 0.07  | 0.01 | 4.98E-08  |
| CTSO | rs687339    | 3  | 136213517 | T | C | 0.77 | 0.09  | 0.01 | 2.77E-11  |
| CTSO | rs2334114   | 4  | 155935041 | A | C | 0.21 | -0.22 | 0.01 | 6.00E-57  |
| CTSO | rs116105128 | 6  | 32543679  | C | G | 0.12 | -0.10 | 0.01 | 2.89E-07  |
| CTSO | rs75474551  | 6  | 159988862 | T | G | 0.09 | -0.24 | 0.01 | 8.80E-38  |
| CTSO | rs56278466  | 10 | 17833858  | G | T | 0.66 | 0.06  | 0.01 | 6.20E-07  |
| CTSO | rs174560    | 11 | 61814292  | C | T | 0.31 | 0.07  | 0.01 | 3.11E-08  |
| CTSO | rs2417888   | 12 | 20896816  | T | A | 0.15 | 0.13  | 0.01 | 2.71E-16  |
| CTSO | -           | 12 | 101818376 | C | T | 0.35 | -0.16 | 0.01 | 1.49E-43  |

|        |             |    |           |   |   |      |       |      |           |
|--------|-------------|----|-----------|---|---|------|-------|------|-----------|
| CTSO   | rs146326139 | 12 | 123672628 | C | G | 0.01 | -0.23 | 0.03 | 3.03E-06  |
| CTSO   | rs58542926  | 19 | 19268740  | T | C | 0.08 | 0.25  | 0.01 | 1.42E-33  |
| CTSO   | rs738409    | 22 | 43928847  | G | C | 0.22 | 0.06  | 0.01 | 6.61E-06  |
| CTSS   | rs771911677 | 1  | 150715890 | A | T | 0.48 | -0.44 | 0.01 | 5.29E-266 |
| CTSS   | rs8191750   | 6  | 160025566 | G | A | 0.14 | 0.10  | 0.01 | 2.36E-09  |
| CTSS   | rs545971    | 9  | 133267960 | T | C | 0.32 | -0.07 | 0.01 | 2.52E-07  |
| CTSS   | rs79751758  | 10 | 99496620  | A | C | 0.11 | 0.09  | 0.01 | 1.05E-06  |
| CTSS   | rs10896415  | 11 | 69071866  | A | G | 0.36 | -0.06 | 0.01 | 3.88E-07  |
| CTSS   | rs4883201   | 12 | 8929985   | G | A | 0.11 | 0.16  | 0.01 | 1.08E-17  |
| CTSS   | rs3184504   | 12 | 111446804 | C | T | 0.52 | -0.06 | 0.01 | 4.46E-07  |
| CTSS   | rs11655264  | 17 | 39982742  | C | G | 0.45 | -0.05 | 0.01 | 2.23E-05  |
| CTSV   | rs13407583  | 2  | 113210163 | A | G | 0.21 | 0.06  | 0.01 | 1.98E-06  |
| CTSV   | rs28493806  | 4  | 105185552 | G | A | 0.37 | 0.05  | 0.01 | 1.85E-05  |
| CTSV   | rs35716097  | 5  | 177379635 | T | C | 0.30 | 0.07  | 0.01 | 4.21E-10  |
| CTSV   | rs260237    | 6  | 42424840  | T | C | 0.11 | -0.09 | 0.01 | 8.23E-08  |
| CTSV   | rs3957356   | 6  | 52803872  | C | T | 0.57 | -0.11 | 0.01 | 2.19E-26  |
| CTSV   | -           | 7  | 28430643  | A | G | 0.37 | -0.08 | 0.01 | 6.75E-14  |
| CTSV   | rs12686511  | 9  | 97146762  | T | C | 0.21 | 0.25  | 0.01 | 8.28E-83  |
| CTSV   | rs635634    | 9  | 133279427 | T | C | 0.18 | -0.11 | 0.01 | 5.03E-16  |
| CTSV   | rs7087998   | 10 | 58511771  | G | A | 0.45 | 0.07  | 0.01 | 2.61E-11  |
| CTSV   | rs2559850   | 12 | 101699681 | A | G | 0.59 | 0.12  | 0.01 | 2.16E-28  |
| CTSV   | rs6490117   | 12 | 117161544 | G | C | 0.45 | -0.05 | 0.01 | 2.82E-06  |
| CTSV   | rs3830659   | 12 | 120979733 | C | G | 0.30 | -0.12 | 0.01 | 1.60E-24  |
| CTSV   | rs340029    | 15 | 60602766  | T | C | 0.62 | -0.05 | 0.01 | 2.82E-05  |
| CTSV   | rs112746916 | 15 | 63077855  | T | C | 0.22 | 0.06  | 0.01 | 4.55E-06  |
| CTSV   | rs4077451   | 16 | 79897823  | A | T | 0.85 | 0.10  | 0.01 | 5.11E-11  |
| CTSV   | rs114711456 | 17 | 37819219  | G | A | 0.00 | -0.34 | 0.05 | 2.28E-05  |
| CTSV   | rs34582033  | 17 | 48634777  | C | T | 0.17 | -0.06 | 0.01 | 2.70E-05  |
| CTSV   | rs123698    | 19 | 807442    | C | G | 0.61 | 0.05  | 0.01 | 8.87E-06  |
| CTSV   | rs12019136  | 19 | 5835666   | A | G | 0.04 | 0.13  | 0.02 | 5.28E-07  |
| CTSV   | rs78581838  | 21 | 14864259  | T | C | 0.09 | 0.09  | 0.01 | 6.11E-07  |
| CTSZ   | rs41271951  | 1  | 150764744 | G | A | 0.09 | -0.11 | 0.01 | 1.36E-08  |
| CTSZ   | rs61747728  | 1  | 179557079 | T | C | 0.04 | 0.12  | 0.02 | 2.80E-05  |
| CTSZ   | rs687339    | 3  | 136213517 | T | C | 0.77 | 0.08  | 0.01 | 4.32E-09  |
| CTSZ   | rs3021302   | 6  | 32655373  | C | T | 0.17 | 0.07  | 0.01 | 1.45E-06  |
| CTSZ   | -           | 6  | 130042457 | C | T | 0.57 | 0.06  | 0.01 | 7.43E-07  |
| CTSZ   | rs9346805   | 6  | 160001183 | T | C | 0.14 | -0.07 | 0.01 | 1.78E-05  |
| CTSZ   | rs149871778 | 12 | 8946399   | C | G | 0.10 | 0.10  | 0.01 | 2.72E-07  |
| CTSZ   | rs4764824   | 12 | 101826225 | G | C | 0.29 | -0.32 | 0.01 | 8.38E-152 |
| CTSZ   | rs150641790 | 13 | 41113708  | G | T | 0.07 | 0.10  | 0.01 | 2.71E-06  |
| CTSZ   | rs145078947 | 14 | 93186629  | T | G | 0.00 | 0.78  | 0.07 | 3.18E-13  |
| CTSZ   | rs200210321 | 19 | 19283081  | G | A | 0.07 | 0.17  | 0.01 | 8.67E-16  |
| CTSZ   | rs429358    | 19 | 44908684  | C | T | 0.16 | -0.09 | 0.01 | 1.27E-08  |
| CTSZ   | rs199825459 | 20 | 58997654  | G | A | 0.01 | -1.95 | 0.04 | 8.72E-240 |
| CX3CL1 | rs114921587 | 1  | 21345480  | A | G | 0.10 | 0.09  | 0.01 | 1.49E-06  |
| CX3CL1 | rs61747728  | 1  | 179557079 | T | C | 0.04 | 0.13  | 0.02 | 1.40E-05  |
| CX3CL1 | rs3732378   | 3  | 39265671  | A | G | 0.17 | 0.08  | 0.01 | 1.52E-08  |
| CX3CL1 | rs9264666   | 6  | 31271519  | C | G | 0.55 | -0.09 | 0.01 | 3.33E-15  |
| CX3CL1 | rs785914    | 9  | 76485879  | C | T | 0.74 | 0.06  | 0.01 | 5.25E-06  |
| CX3CL1 | rs507666    | 9  | 133273983 | A | G | 0.18 | -0.13 | 0.01 | 3.71E-18  |
| CX3CL1 | rs9414801   | 10 | 63389329  | A | G | 0.53 | -0.05 | 0.01 | 2.48E-06  |
| CX3CL1 | rs781264602 | 16 | 57375150  | A | G | 0.62 | -0.23 | 0.01 | 6.61E-87  |
| CX3CL1 | rs681343    | 19 | 48703205  | T | C | 0.51 | 0.06  | 0.01 | 1.51E-06  |
| CXADR  | rs6705147   | 2  | 132439353 | T | C | 0.33 | -0.05 | 0.01 | 9.60E-06  |
| CXADR  | -           | 9  | 133263362 | G | A | 0.18 | -0.34 | 0.01 | 1.71E-123 |
| CXADR  | rs56398830  | 13 | 103049340 | A | G | 0.01 | -0.42 | 0.03 | 3.79E-15  |

|        |             |    |           |   |   |      |       |      |           |
|--------|-------------|----|-----------|---|---|------|-------|------|-----------|
| CXADR  | rs12938714  | 17 | 30318092  | A | G | 0.33 | 0.08  | 0.01 | 3.37E-12  |
| CXADR  | rs681343    | 19 | 48703205  | T | C | 0.51 | -0.18 | 0.01 | 7.83E-57  |
| CXADR  | rs2739393   | 21 | 17562221  | A | G | 0.67 | -0.12 | 0.01 | 4.17E-25  |
| CXCL1  | rs12075     | 1  | 159205564 | A | G | 0.58 | 0.06  | 0.01 | 6.38E-09  |
| CXCL1  | rs3097411   | 4  | 73872737  | G | C | 0.24 | 0.67  | 0.01 | 0.00E+00  |
| CXCL1  | rs34077178  | 6  | 32582426  | A | T | 0.22 | -0.10 | 0.01 | 4.20E-15  |
| CXCL1  | rs7080386   | 10 | 63288546  | A | C | 0.41 | 0.09  | 0.01 | 5.14E-17  |
| CXCL1  | rs1362213   | 12 | 6173262   | T | C | 0.48 | -0.05 | 0.01 | 2.81E-05  |
| CXCL1  | rs111338191 | 12 | 111388673 | T | A | 0.52 | -0.05 | 0.01 | 1.51E-05  |
| CXCL10 | rs113010081 | 3  | 46415921  | C | T | 0.12 | -0.08 | 0.01 | 9.28E-06  |
| CXCL10 | rs11548618  | 4  | 76022794  | A | G | 0.01 | 1.72  | 0.04 | 1.79E-152 |
| CXCL10 | rs9271566   | 6  | 32622666  | G | A | 0.42 | -0.07 | 0.01 | 9.98E-09  |
| CXCL10 | rs67504709  | 9  | 32527512  | A | T | 0.11 | -0.08 | 0.01 | 2.33E-05  |
| CXCL10 | rs3184504   | 12 | 111446804 | C | T | 0.52 | -0.10 | 0.01 | 7.26E-22  |
| CXCL11 | rs76036957  | 2  | 112738876 | A | G | 0.01 | 0.28  | 0.04 | 3.38E-06  |
| CXCL11 | rs35170645  | 4  | 76043803  | G | A | 0.51 | -0.22 | 0.01 | 5.15E-87  |
| CXCL11 | rs13181561  | 5  | 139471320 | A | G | 0.74 | 0.06  | 0.01 | 3.20E-06  |
| CXCL11 | rs11962818  | 6  | 31352399  | T | C | 0.16 | -0.08 | 0.01 | 2.24E-07  |
| CXCL11 | rs139141690 | 7  | 101856650 | A | G | 0.00 | 1.15  | 0.05 | 1.25E-44  |
| CXCL11 | rs7080386   | 10 | 63288546  | A | C | 0.41 | 0.10  | 0.01 | 6.09E-20  |
| CXCL11 | rs113422568 | 10 | 102578181 | A | G | 0.33 | -0.09 | 0.01 | 1.23E-12  |
| CXCL11 | rs3184504   | 12 | 111446804 | C | T | 0.52 | -0.12 | 0.01 | 4.20E-29  |
| CXCL11 | rs1654425   | 19 | 55027612  | C | T | 0.83 | 0.10  | 0.01 | 2.23E-11  |
| CXCL12 | rs6542680   | 2  | 3592552   | T | C | 0.82 | -0.07 | 0.01 | 4.35E-06  |
| CXCL12 | rs709162    | 3  | 12479681  | G | T | 0.57 | 0.05  | 0.01 | 6.85E-06  |
| CXCL12 | -           | 3  | 29416540  | A | T | 0.53 | -0.05 | 0.01 | 1.12E-05  |
| CXCL12 | rs1354034   | 3  | 56815721  | C | T | 0.60 | -0.05 | 0.01 | 7.25E-06  |
| CXCL12 | rs113760175 | 6  | 22343363  | A | G | 0.07 | 0.13  | 0.01 | 1.22E-08  |
| CXCL12 | rs3131626   | 6  | 31447373  | G | A | 0.32 | 0.06  | 0.01 | 7.77E-06  |
| CXCL12 | rs7028191   | 9  | 134225650 | T | C | 0.44 | -0.05 | 0.01 | 2.70E-05  |
| CXCL12 | rs11239028  | 10 | 44387717  | T | C | 0.34 | 0.19  | 0.01 | 1.63E-56  |
| CXCL12 | rs7896518   | 10 | 63344740  | G | A | 0.42 | 0.07  | 0.01 | 4.94E-09  |
| CXCL12 | rs3184504   | 12 | 111446804 | C | T | 0.52 | -0.05 | 0.01 | 2.97E-06  |
| CXCL12 | rs1654425   | 19 | 55027612  | C | T | 0.83 | 0.07  | 0.01 | 3.97E-06  |
| CXCL13 | rs2053526   | 4  | 77504875  | G | A | 0.40 | -0.05 | 0.01 | 1.59E-05  |
| CXCL13 | rs13204736  | 6  | 32614826  | A | G | 0.35 | 0.06  | 0.01 | 1.47E-06  |
| CXCL13 | rs55730499  | 6  | 160584578 | T | C | 0.08 | 0.11  | 0.01 | 3.74E-07  |
| CXCL13 | rs10849448  | 12 | 6384185   | G | A | 0.75 | -0.06 | 0.01 | 1.09E-05  |
| CXCL13 | rs111338191 | 12 | 111388673 | T | A | 0.52 | -0.08 | 0.01 | 5.83E-11  |
| CXCL13 | rs34557412  | 17 | 16948873  | G | A | 0.01 | 0.36  | 0.05 | 4.44E-07  |
| CXCL13 | rs77542162  | 17 | 69085137  | G | A | 0.02 | 0.30  | 0.02 | 9.33E-15  |
| CXCL13 | rs190712692 | 19 | 44921921  | A | G | 0.05 | 0.14  | 0.02 | 7.00E-08  |
| CXCL13 | rs2412973   | 22 | 30133642  | A | C | 0.44 | -0.07 | 0.01 | 2.89E-09  |
| CXCL14 | rs4744      | 1  | 19978433  | A | G | 0.23 | -0.07 | 0.01 | 5.61E-07  |
| CXCL14 | rs2078404   | 5  | 135623175 | A | G | 0.36 | -0.07 | 0.01 | 8.13E-10  |
| CXCL14 | rs766802806 | 6  | 160714635 | C | T | 0.29 | -0.07 | 0.01 | 1.74E-08  |
| CXCL16 | rs2009581   | 2  | 111050100 | A | G | 0.27 | 0.17  | 0.01 | 4.07E-45  |
| CXCL16 | rs4347833   | 2  | 197693098 | T | G | 0.53 | 0.05  | 0.01 | 2.47E-05  |
| CXCL16 | rs79806033  | 3  | 46053110  | A | G | 0.20 | -0.12 | 0.01 | 4.50E-20  |
| CXCL16 | rs7726159   | 5  | 1282204   | A | C | 0.33 | -0.05 | 0.01 | 2.29E-05  |
| CXCL16 | rs117030384 | 6  | 32606168  | T | A | 0.02 | -0.29 | 0.02 | 7.98E-15  |
| CXCL16 | rs748113    | 10 | 71749034  | C | T | 0.43 | -0.10 | 0.01 | 2.38E-19  |
| CXCL16 | rs1250567   | 10 | 79286508  | C | T | 0.45 | -0.08 | 0.01 | 2.36E-12  |
| CXCL16 | rs3184504   | 12 | 111446804 | C | T | 0.52 | 0.09  | 0.01 | 2.23E-16  |
| CXCL16 | rs748988    | 14 | 99319904  | G | A | 0.61 | 0.06  | 0.01 | 7.02E-07  |
| CXCL16 | rs78086290  | 17 | 4738075   | T | A | 0.53 | 0.19  | 0.01 | 4.01E-65  |

|        |             |    |           |   |   |      |       |      |           |
|--------|-------------|----|-----------|---|---|------|-------|------|-----------|
| CXCL16 | rs77542162  | 17 | 69085137  | G | A | 0.02 | 0.30  | 0.02 | 1.85E-16  |
| CXCL16 | rs875622    | 19 | 16356948  | G | A | 0.77 | -0.09 | 0.01 | 1.40E-11  |
| CXCL16 | rs6031302   | 20 | 44027670  | G | C | 0.73 | -0.09 | 0.01 | 3.28E-12  |
| CXCL17 | rs7592      | 8  | 22164370  | A | G | 0.33 | -0.07 | 0.01 | 2.33E-11  |
| CXCL17 | rs13281991  | 8  | 119911334 | C | T | 0.56 | 0.05  | 0.01 | 1.74E-06  |
| CXCL17 | rs34283575  | 10 | 79577610  | T | C | 0.52 | 0.05  | 0.01 | 5.42E-06  |
| CXCL17 | rs117753190 | 17 | 69140184  | G | C | 0.04 | 0.16  | 0.02 | 1.81E-09  |
| CXCL17 | rs4807612   | 19 | 1156854   | C | T | 0.32 | -0.06 | 0.01 | 4.15E-09  |
| CXCL17 | rs11668599  | 19 | 42450984  | G | A | 0.08 | 0.12  | 0.01 | 3.76E-10  |
| CXCL3  | rs12640189  | 4  | 6891454   | T | C | 0.17 | 0.07  | 0.01 | 5.54E-06  |
| CXCL3  | rs3104369   | 6  | 32634705  | C | T | 0.77 | -0.10 | 0.01 | 2.45E-13  |
| CXCL3  | rs7896518   | 10 | 63344740  | G | A | 0.42 | 0.07  | 0.01 | 7.87E-09  |
| CXCL5  | rs2274319   | 1  | 156481081 | C | T | 0.65 | -0.05 | 0.01 | 8.78E-06  |
| CXCL5  | rs34174712  | 2  | 241692164 | C | T | 0.55 | 0.05  | 0.01 | 4.71E-06  |
| CXCL5  | rs11925560  | 3  | 47217970  | T | A | 0.39 | 0.05  | 0.01 | 6.48E-06  |
| CXCL5  | rs1354034   | 3  | 56815721  | C | T | 0.60 | -0.12 | 0.01 | 4.01E-28  |
| CXCL5  | rs12640189  | 4  | 6891454   | T | C | 0.17 | 0.09  | 0.01 | 1.06E-08  |
| CXCL5  | rs352045    | 4  | 73998970  | G | T | 0.88 | -0.59 | 0.01 | 1.26E-259 |
| CXCL5  | rs6993770   | 8  | 105569300 | T | A | 0.29 | 0.08  | 0.01 | 4.23E-12  |
| CXCL5  | rs4631576   | 9  | 97942928  | T | C | 0.36 | 0.06  | 0.01 | 1.75E-08  |
| CXCL5  | rs10993918  | 9  | 134076423 | A | G | 0.32 | -0.09 | 0.01 | 1.72E-14  |
| CXCL5  | rs9787438   | 10 | 63278270  | C | G | 0.41 | 0.21  | 0.01 | 7.59E-87  |
| CXCL5  | -           | 10 | 102591498 | C | A | 0.44 | -0.06 | 0.01 | 3.91E-08  |
| CXCL5  | rs1654425   | 19 | 55027612  | C | T | 0.83 | 0.09  | 0.01 | 1.12E-09  |
| CXCL6  | rs12075     | 1  | 159205564 | A | G | 0.58 | 0.08  | 0.01 | 7.12E-15  |
| CXCL6  | rs1260326   | 2  | 27508073  | C | T | 0.61 | -0.05 | 0.01 | 4.44E-06  |
| CXCL6  | rs16858768  | 2  | 218161975 | C | A | 0.00 | 0.44  | 0.06 | 1.06E-05  |
| CXCL6  | rs7618405   | 3  | 18209017  | A | C | 0.21 | -0.06 | 0.01 | 1.11E-05  |
| CXCL6  | rs16850073  | 4  | 73838282  | T | C | 0.38 | 0.56  | 0.01 | 0.00E+00  |
| CXCL6  | -           | 9  | 4767255   | C | T | 0.22 | 0.06  | 0.01 | 6.84E-06  |
| CXCL6  | rs10761737  | 10 | 63292445  | C | T | 0.41 | 0.07  | 0.01 | 6.44E-10  |
| CXCL6  | rs111338191 | 12 | 111388673 | T | A | 0.52 | -0.06 | 0.01 | 2.01E-08  |
| CXCL6  | rs892090    | 19 | 55027704  | G | T | 0.83 | 0.11  | 0.01 | 2.01E-13  |
| CXCL8  | rs28732243  | 6  | 32476311  | G | C | 0.52 | -0.06 | 0.01 | 6.82E-07  |
| CXCL8  | rs12075     | 1  | 159205564 | A | G | 0.58 | 0.14  | 0.01 | 1.68E-34  |
| CXCL8  | rs16858768  | 2  | 218161975 | C | A | 0.00 | 0.96  | 0.07 | 1.54E-20  |
| CXCL8  | rs74468557  | 4  | 73725686  | A | G | 0.05 | -0.17 | 0.02 | 7.74E-12  |
| CXCL8  | rs4541868   | 8  | 105578477 | A | C | 0.27 | -0.06 | 0.01 | 8.30E-07  |
| CXCL8  | rs7080386   | 10 | 63288546  | A | C | 0.41 | 0.09  | 0.01 | 4.98E-14  |
| CXCL8  | -           | 10 | 102591498 | C | A | 0.44 | -0.06 | 0.01 | 6.34E-07  |
| CXCL8  | rs1058935   | 11 | 308363    | C | G | 0.51 | -0.05 | 0.01 | 2.04E-05  |
| CXCL8  | rs2305482   | 17 | 39984674  | C | A | 0.54 | 0.08  | 0.01 | 2.89E-12  |
| CXCL8  | rs892090    | 19 | 55027704  | G | T | 0.83 | 0.11  | 0.01 | 2.41E-12  |
| CXCL9  | rs2476601   | 1  | 113834946 | G | A | 0.90 | -0.09 | 0.01 | 1.35E-07  |
| CXCL9  | rs13118503  | 4  | 75939317  | T | C | 0.24 | -0.15 | 0.01 | 8.04E-33  |
| CXCL9  | rs2858864   | 6  | 32610452  | T | C | 0.22 | 0.07  | 0.01 | 5.62E-08  |
| CXCL9  | rs4252129   | 6  | 160731873 | T | C | 0.02 | -0.30 | 0.03 | 2.21E-13  |
| CXCL9  | rs3184504   | 12 | 111446804 | C | T | 0.52 | -0.11 | 0.01 | 3.23E-26  |
| DAB2   | rs342292    | 7  | 106730198 | G | C | 0.46 | -0.05 | 0.01 | 1.58E-05  |
| DAB2   | rs6993770   | 8  | 105569300 | T | A | 0.29 | -0.07 | 0.01 | 1.10E-08  |
| DAB2   | rs3847326   | 10 | 63572099  | G | A | 0.48 | -0.06 | 0.01 | 5.25E-07  |
| DAB2   | rs200309755 | 17 | 29518756  | T | C | 0.54 | 0.05  | 0.01 | 1.20E-05  |
| DAG1   | -           | 3  | 49452394  | C | A | 0.31 | 0.06  | 0.01 | 2.08E-06  |
| DAG1   | rs1354034   | 3  | 56815721  | C | T | 0.60 | 0.05  | 0.01 | 1.66E-05  |
| DAG1   | rs409801    | 9  | 4744743   | C | T | 0.51 | 0.05  | 0.01 | 1.50E-05  |
| DAG1   | rs71463509  | 10 | 63248398  | C | G | 0.30 | -0.06 | 0.01 | 1.84E-05  |

|        |             |    |           |   |   |      |       |      |           |
|--------|-------------|----|-----------|---|---|------|-------|------|-----------|
| DAG1   | rs111338191 | 12 | 111388673 | T | A | 0.52 | -0.06 | 0.01 | 4.68E-07  |
| DAG1   | rs1671152   | 19 | 55014977  | G | T | 0.84 | 0.07  | 0.01 | 4.84E-06  |
| DAPP1  | rs1354034   | 3  | 56815721  | C | T | 0.60 | 0.06  | 0.01 | 6.43E-07  |
| DAPP1  | rs7688733   | 4  | 99831495  | G | A | 0.48 | -0.10 | 0.01 | 4.19E-18  |
| DARS1  | rs149170955 | 2  | 135933930 | A | G | 0.00 | -0.97 | 0.09 | 9.87E-13  |
| DARS1  | rs78909033  | 2  | 240571486 | A | G | 0.14 | -0.10 | 0.01 | 7.27E-09  |
| DARS1  | rs1354034   | 3  | 56815721  | C | T | 0.60 | 0.07  | 0.01 | 4.65E-09  |
| DARS1  | rs342293    | 7  | 106731773 | G | C | 0.46 | -0.06 | 0.01 | 1.27E-06  |
| DARS1  | rs7896518   | 10 | 63344740  | G | A | 0.42 | 0.05  | 0.01 | 1.53E-05  |
| DARS1  | rs60822569  | 12 | 54323724  | C | T | 0.55 | 0.05  | 0.01 | 2.10E-05  |
| DBI    | rs72833212  | 2  | 119378891 | G | T | 0.20 | -0.32 | 0.01 | 9.40E-115 |
| DBI    | rs1354034   | 3  | 56815721  | C | T | 0.60 | 0.05  | 0.01 | 5.20E-06  |
| DBI    | rs17622656  | 5  | 132485305 | A | G | 0.39 | -0.05 | 0.01 | 1.38E-05  |
| DBI    | rs60822569  | 12 | 54323724  | C | T | 0.55 | 0.05  | 0.01 | 1.84E-05  |
| DBNL   | rs1354034   | 3  | 56815721  | C | T | 0.60 | 0.05  | 0.01 | 6.53E-06  |
| DBNL   | rs7799945   | 7  | 44070203  | G | A | 0.33 | 0.06  | 0.01 | 9.28E-07  |
| DBNL   | rs342298    | 7  | 106733200 | T | C | 0.45 | -0.05 | 0.01 | 3.78E-06  |
| DBNL   | rs6993770   | 8  | 105569300 | T | A | 0.29 | -0.06 | 0.01 | 9.67E-07  |
| DCBLD2 | rs602633    | 1  | 109278889 | G | T | 0.78 | 0.06  | 0.01 | 2.79E-05  |
| DCBLD2 | rs12487717  | 3  | 98886163  | A | G | 0.01 | -1.07 | 0.03 | 2.08E-110 |
| DCBLD2 | -           | 3  | 170961087 | G | A | 0.29 | -0.06 | 0.01 | 3.40E-07  |
| DCBLD2 | -           | 4  | 3477071   | C | A | 0.40 | -0.06 | 0.01 | 2.30E-08  |
| DCBLD2 | rs149999508 | 5  | 75053219  | G | C | 0.23 | -0.07 | 0.01 | 2.11E-08  |
| DCBLD2 | -           | 8  | 58522382  | T | C | 0.61 | 0.05  | 0.01 | 2.63E-05  |
| DCBLD2 | rs28601761  | 8  | 125487789 | G | C | 0.42 | -0.06 | 0.01 | 3.29E-08  |
| DCBLD2 | rs115478735 | 9  | 133274295 | T | A | 0.18 | -0.06 | 0.01 | 1.15E-05  |
| DCBLD2 | rs56278466  | 10 | 17833858  | G | T | 0.66 | 0.08  | 0.01 | 1.08E-13  |
| DCBLD2 | rs10822145  | 10 | 63174788  | T | C | 0.47 | 0.05  | 0.01 | 2.60E-05  |
| DCBLD2 | rs174581    | 11 | 61839211  | A | G | 0.35 | 0.05  | 0.01 | 3.08E-06  |
| DCBLD2 | rs2464190   | 12 | 120977587 | C | T | 0.41 | 0.05  | 0.01 | 1.04E-05  |
| DCBLD2 | rs28929474  | 14 | 94378610  | T | C | 0.02 | 0.50  | 0.02 | 9.18E-41  |
| DCBLD2 | rs11078597  | 17 | 1715069   | C | T | 0.19 | 0.07  | 0.01 | 1.71E-07  |
| DCBLD2 | rs430881    | 17 | 9694808   | G | T | 0.24 | 0.06  | 0.01 | 1.24E-06  |
| DCBLD2 | rs77542162  | 17 | 69085137  | G | A | 0.02 | -0.20 | 0.02 | 3.37E-08  |
| DCBLD2 | rs58542926  | 19 | 19268740  | T | C | 0.08 | -0.12 | 0.01 | 1.01E-08  |
| DCBLD2 | rs1672992   | 19 | 35065825  | T | C | 0.86 | 0.14  | 0.01 | 5.43E-21  |
| DCBLD2 | rs117486964 | 19 | 49478786  | G | A | 0.05 | 0.12  | 0.02 | 5.78E-06  |
| DCBLD2 | rs9980195   | 21 | 44848868  | C | T | 0.53 | -0.05 | 0.01 | 1.05E-05  |
| DCN    | rs1260326   | 2  | 27508073  | C | T | 0.61 | 0.06  | 0.01 | 5.49E-08  |
| DCTN1  | rs1339847   | 1  | 247875992 | A | G | 0.11 | -0.11 | 0.01 | 6.07E-09  |
| DCTN1  | rs35505243  | 2  | 97646864  | T | A | 0.08 | -0.10 | 0.01 | 2.58E-06  |
| DCTN1  | -           | 10 | 102638182 | A | T | 0.64 | 0.06  | 0.01 | 2.98E-06  |
| DCTN2  | rs1354034   | 3  | 56815721  | C | T | 0.60 | 0.05  | 0.01 | 2.18E-05  |
| DCTN2  | rs342293    | 7  | 106731773 | G | C | 0.46 | -0.05 | 0.01 | 2.02E-05  |
| DCTN6  | rs112625444 | 10 | 102542139 | T | G | 0.35 | -0.05 | 0.01 | 1.53E-05  |
| DCTPP1 | rs61801010  | 1  | 161572445 | G | A | 0.11 | 0.09  | 0.01 | 1.13E-06  |
| DCTPP1 | rs1354034   | 3  | 56815721  | C | T | 0.60 | 0.06  | 0.01 | 1.25E-06  |
| DCTPP1 | rs12342201  | 9  | 93132682  | A | G | 0.48 | -0.05 | 0.01 | 1.48E-06  |
| DCTPP1 | rs56278466  | 10 | 17833858  | G | T | 0.66 | 0.10  | 0.01 | 9.32E-17  |
| DCTPP1 | rs3751198   | 12 | 103753429 | G | A | 0.60 | 0.05  | 0.01 | 3.24E-06  |
| DCTPP1 | rs146094440 | 16 | 30424280  | G | C | 0.01 | -0.51 | 0.03 | 3.01E-22  |
| DCXR   | -           | 8  | 125492141 | C | T | 0.60 | -0.05 | 0.01 | 2.82E-05  |
| DCXR   | rs10119644  | 9  | 114367312 | A | T | 0.50 | -0.07 | 0.01 | 2.15E-11  |
| DCXR   | rs10883451  | 10 | 100164661 | C | T | 0.50 | -0.06 | 0.01 | 8.98E-08  |
| DCXR   | rs139130389 | 11 | 72139110  | A | C | 0.07 | -0.12 | 0.01 | 5.00E-09  |
| DCXR   | rs4342991   | 11 | 94120504  | C | G | 0.11 | -0.10 | 0.01 | 7.68E-08  |

|               |             |    |           |   |   |      |       |      |           |
|---------------|-------------|----|-----------|---|---|------|-------|------|-----------|
| DCXR          | rs61746217  | 17 | 82036043  | T | C | 0.00 | -0.76 | 0.06 | 7.09E-15  |
| DCXR          | rs132642    | 22 | 36149089  | T | A | 0.83 | 0.06  | 0.01 | 2.65E-05  |
| DCXR          | rs3747207   | 22 | 43928975  | A | G | 0.22 | 0.08  | 0.01 | 2.52E-09  |
| DDAH1         | rs12138621  | 1  | 85318287  | C | T | 0.21 | -0.18 | 0.01 | 5.38E-40  |
| DDAH1         | rs1434282   | 1  | 199041592 | T | C | 0.73 | 0.09  | 0.01 | 4.07E-12  |
| DDAH1         | rs342293    | 7  | 106731773 | G | C | 0.46 | -0.05 | 0.01 | 2.53E-05  |
| DDAH1         | rs72882960  | 11 | 268927    | T | C | 0.24 | 0.06  | 0.01 | 2.33E-05  |
| DDAH1         | rs61905116  | 11 | 116778822 | G | A | 0.06 | 0.17  | 0.02 | 8.24E-13  |
| DDC           | rs62265630  | 3  | 124756354 | G | T | 0.15 | -0.07 | 0.01 | 2.47E-05  |
| DDC           | rs34103191  | 4  | 68493562  | G | A | 0.66 | -0.05 | 0.01 | 1.67E-05  |
| DDC           | rs17209803  | 6  | 32475284  | A | C | 0.04 | 0.15  | 0.02 | 1.22E-07  |
| DDC           | rs12112308  | 7  | 50535789  | C | T | 0.02 | -1.43 | 0.03 | 1.17E-224 |
| DDC           | rs12342201  | 9  | 93132682  | A | G | 0.48 | -0.06 | 0.01 | 7.33E-07  |
| DDC           | rs601338    | 19 | 48703417  | A | G | 0.51 | -0.08 | 0.01 | 2.76E-14  |
| DDC           | rs3747207   | 22 | 43928975  | A | G | 0.22 | 0.08  | 0.01 | 3.43E-09  |
| DDR1          | rs3095353   | 6  | 30836031  | A | T | 0.59 | -0.35 | 0.01 | 6.01E-209 |
| DDR1          | rs4841132   | 8  | 9326086   | G | A | 0.91 | -0.13 | 0.01 | 5.19E-12  |
| DDR1          | rs8176644   | 9  | 133273734 | T | C | 0.06 | 0.10  | 0.01 | 5.46E-06  |
| DDR1          | rs56278466  | 10 | 17833858  | G | T | 0.66 | 0.06  | 0.01 | 1.95E-08  |
| DDR1          | rs78689694  | 11 | 126364925 | C | G | 0.13 | -0.09 | 0.01 | 3.04E-08  |
| DDR1          | rs60309576  | 12 | 514259    | A | G | 0.26 | -0.07 | 0.01 | 2.31E-08  |
| DDR1          | rs139097404 | 15 | 43641743  | C | T | 0.02 | -0.17 | 0.02 | 8.72E-06  |
| DDR1          | rs186021206 | 17 | 7166093   | A | G | 0.01 | 0.84  | 0.05 | 3.09E-31  |
| DDR1          | rs111913125 | 17 | 49173964  | C | A | 0.10 | 0.12  | 0.01 | 5.60E-12  |
| DDR1          | rs708686    | 19 | 5840608   | T | C | 0.27 | 0.05  | 0.01 | 1.09E-05  |
| DDR1          | rs58560372  | 19 | 38268112  | T | C | 0.15 | -0.07 | 0.01 | 5.17E-06  |
| DDR1          | rs681343    | 19 | 48703205  | T | C | 0.51 | 0.13  | 0.01 | 5.00E-32  |
| DDR1          | rs55953905  | 21 | 41510744  | T | C | 0.25 | 0.11  | 0.01 | 7.81E-20  |
| DDX58         | rs1133071   | 9  | 32455676  | G | A | 0.30 | 0.29  | 0.01 | 4.85E-116 |
| DECR1         | rs189045259 | 8  | 90039325  | A | G | 0.00 | -0.96 | 0.06 | 5.29E-29  |
| DECR1         | rs6993770   | 8  | 105569300 | T | A | 0.29 | -0.06 | 0.01 | 1.26E-06  |
| DECR1         | rs1671152   | 19 | 55014977  | G | T | 0.84 | 0.07  | 0.01 | 1.05E-05  |
| DEFA1_DEFA1B  | rs3917932   | 1  | 36478315  | G | C | 0.58 | -0.08 | 0.01 | 3.85E-12  |
| DEFA1_DEFA1B  | rs12738019  | 1  | 54410526  | G | A | 0.56 | -0.05 | 0.01 | 5.69E-06  |
| DEFA1_DEFA1B  | rs7561229   | 2  | 61510855  | T | A | 0.61 | -0.05 | 0.01 | 2.35E-05  |
| DEFA1_DEFA1B  | rs61740288  | 2  | 71535283  | A | G | 0.02 | 0.21  | 0.03 | 7.81E-08  |
| DEFA1_DEFA1B  | rs13063578  | 3  | 47046347  | A | T | 0.40 | -0.05 | 0.01 | 2.00E-06  |
| DEFA1_DEFA1B  | rs4857909   | 3  | 128581625 | G | A | 0.88 | -0.07 | 0.01 | 2.59E-05  |
| DEFA1_DEFA1B  | rs218264    | 4  | 54542708  | T | A | 0.25 | 0.06  | 0.01 | 3.03E-06  |
| DEFA1_DEFA1B  | rs77547572  | 5  | 99115671  | A | G | 0.08 | 0.09  | 0.01 | 2.08E-05  |
| DEFA1_DEFA1B  | rs3128959   | 6  | 33080603  | A | G | 0.12 | 0.19  | 0.01 | 1.61E-28  |
| DEFA1_DEFA1B  | rs915125    | 6  | 81753659  | T | C | 0.28 | 0.06  | 0.01 | 4.68E-07  |
| DEFA1_DEFA1B  | rs210962    | 6  | 135182647 | T | C | 0.24 | -0.10 | 0.01 | 1.29E-13  |
| DEFA1_DEFA1B  | rs116236945 | 8  | 7019405   | T | C | 0.39 | -0.27 | 0.01 | 3.27E-96  |
| DEFA1_DEFA1B  | rs35440906  | 8  | 60733792  | A | C | 0.19 | 0.13  | 0.01 | 4.46E-19  |
| DEFA1_DEFA1B  | rs10103048  | 8  | 129590035 | C | A | 0.59 | -0.06 | 0.01 | 2.61E-06  |
| DEFA1_DEFA1B  | rs59974297  | 10 | 99486544  | T | G | 0.89 | -0.09 | 0.01 | 3.86E-07  |
| DEFA1_DEFA1B  | rs8071037   | 17 | 39996051  | T | A | 0.54 | -0.11 | 0.01 | 1.22E-24  |
| DEFA1_DEFA1B  | rs145144275 | 19 | 58350442  | G | A | 0.01 | -0.28 | 0.04 | 2.58E-06  |
| DEFA1_DEFA1B  | rs113033845 | 22 | 31918294  | T | A | 0.29 | -0.05 | 0.01 | 1.61E-05  |
| DEFB4A_DEFB4B | -           | 6  | 32451297  | C | T | 0.65 | 0.08  | 0.01 | 3.10E-12  |
| DEFB4A_DEFB4B | rs117797877 | 8  | 8307070   | T | C | 0.02 | 0.23  | 0.03 | 6.99E-09  |
| DEFB4A_DEFB4B | rs4831643   | 8  | 12620050  | A | G | 0.28 | -0.13 | 0.01 | 4.18E-23  |
| DEFB4A_DEFB4B | rs7220623   | 17 | 68987774  | T | G | 0.68 | -0.05 | 0.01 | 1.29E-05  |
| DEFB4A_DEFB4B | rs72654473  | 19 | 44911142  | A | C | 0.11 | 0.10  | 0.01 | 8.18E-08  |
| DFFA          | rs183281838 | 1  | 9978155   | T | G | 0.00 | -0.64 | 0.08 | 2.45E-07  |



|        |             |    |           |   |   |      |       |      |           |
|--------|-------------|----|-----------|---|---|------|-------|------|-----------|
| DFFA   | rs1354034   | 3  | 56815721  | C | T | 0.60 | 0.06  | 0.01 | 4.48E-08  |
| DFFA   | -           | 10 | 63156270  | A | T | 0.49 | 0.05  | 0.01 | 4.02E-06  |
| DIABLO | rs1354034   | 3  | 56815721  | C | T | 0.60 | 0.05  | 0.01 | 1.08E-05  |
| DIABLO | rs55646585  | 8  | 143925453 | T | C | 0.41 | 0.05  | 0.01 | 1.26E-05  |
| DIABLO | rs10733789  | 10 | 63188924  | C | T | 0.31 | 0.06  | 0.01 | 5.24E-06  |
| DKK1   | rs7618405   | 3  | 18209017  | A | C | 0.21 | -0.07 | 0.01 | 2.59E-07  |
| DKK1   | rs1354034   | 3  | 56815721  | C | T | 0.60 | -0.09 | 0.01 | 3.01E-14  |
| DKK1   | rs142178438 | 4  | 82998046  | A | G | 0.81 | -0.07 | 0.01 | 5.98E-06  |
| DKK1   | rs755492124 | 4  | 101856385 | T | G | 0.39 | -0.06 | 0.01 | 1.88E-07  |
| DKK1   | rs35173808  | 6  | 31358371  | A | C | 0.10 | -0.09 | 0.01 | 9.82E-06  |
| DKK1   | rs6961069   | 7  | 80589645  | T | C | 0.40 | 0.07  | 0.01 | 7.95E-09  |
| DKK1   | rs6993770   | 8  | 105569300 | T | A | 0.29 | -0.19 | 0.01 | 7.07E-52  |
| DKK1   | rs10820606  | 9  | 96430637  | C | A | 0.23 | -0.06 | 0.01 | 1.17E-05  |
| DKK1   | rs7097068   | 10 | 52360120  | G | T | 0.44 | -0.10 | 0.01 | 1.44E-19  |
| DKK1   | rs774510679 | 10 | 63304076  | A | C | 0.41 | 0.14  | 0.01 | 4.37E-35  |
| DKK1   | rs71474568  | 10 | 102589091 | G | T | 0.34 | 0.08  | 0.01 | 9.57E-11  |
| DKK1   | rs59001897  | 15 | 64868193  | A | T | 0.17 | 0.07  | 0.01 | 2.66E-06  |
| DKK1   | -           | 16 | 53256647  | C | T | 0.33 | -0.05 | 0.01 | 2.70E-05  |
| DKK1   | rs12445050  | 16 | 81837364  | T | C | 0.14 | 0.10  | 0.01 | 5.07E-10  |
| DKK1   | rs34416903  | 16 | 88492837  | C | T | 0.28 | 0.07  | 0.01 | 2.92E-08  |
| DKK1   | rs892090    | 19 | 55027704  | G | T | 0.83 | 0.16  | 0.01 | 1.18E-27  |
| DKK1   | rs6081565   | 20 | 19307260  | A | G | 0.35 | 0.07  | 0.01 | 2.85E-08  |
| DKK3   | rs539657009 | 1  | 161658666 | T | C | 0.13 | 0.10  | 0.01 | 2.91E-09  |
| DKK3   | rs2389858   | 7  | 17868507  | A | T | 0.49 | -0.07 | 0.01 | 3.19E-10  |
| DKK3   | rs507666    | 9  | 133273983 | A | G | 0.18 | -0.10 | 0.01 | 2.02E-13  |
| DKK3   | rs196255    | 10 | 119720649 | T | C | 0.41 | -0.07 | 0.01 | 6.08E-10  |
| DKK3   | rs11022114  | 11 | 12017327  | A | G | 0.32 | 0.37  | 0.01 | 3.25E-219 |
| DKK3   | rs2137537   | 12 | 70719307  | C | T | 0.55 | -0.05 | 0.01 | 2.19E-05  |
| DKK3   | rs1609860   | 12 | 103654676 | A | C | 0.08 | 0.30  | 0.01 | 2.81E-57  |
| DKK3   | rs186021206 | 17 | 7166093   | A | G | 0.01 | 0.45  | 0.05 | 6.78E-10  |
| DKK4   | rs78058190  | 2  | 218835276 | A | G | 0.05 | 0.13  | 0.02 | 4.17E-06  |
| DKK4   | rs77203322  | 8  | 42289646  | C | T | 0.05 | -0.55 | 0.02 | 6.04E-103 |
| DKK4   | rs1964528   | 8  | 75477823  | T | C | 0.11 | -0.08 | 0.01 | 7.52E-06  |
| DKK4   | -           | 8  | 104781762 | C | T | 0.31 | -0.05 | 0.01 | 1.30E-05  |
| DKK4   | rs782134971 | 9  | 133264504 | G | C | 0.25 | -0.22 | 0.01 | 5.39E-68  |
| DKK4   | rs7232      | 11 | 60173126  | A | T | 0.37 | 0.07  | 0.01 | 6.14E-10  |
| DKK4   | rs77542162  | 17 | 69085137  | G | A | 0.02 | 0.54  | 0.02 | 2.52E-48  |
| DKK4   | rs492602    | 19 | 48703160  | G | A | 0.51 | -0.05 | 0.01 | 1.66E-05  |
| DKKL1  | rs2740488   | 9  | 104899461 | C | A | 0.27 | -0.04 | 0.00 | 3.09E-08  |
| DKKL1  | -           | 9  | 133274293 | A | C | 0.18 | -0.04 | 0.00 | 2.21E-07  |
| DKKL1  | rs12149545  | 16 | 56959249  | A | G | 0.32 | 0.05  | 0.00 | 7.71E-16  |
| DKKL1  | rs112001035 | 17 | 68827664  | A | G | 0.06 | 0.25  | 0.01 | 1.17E-94  |
| DKKL1  | rs149615216 | 18 | 49579658  | T | C | 0.01 | 0.13  | 0.02 | 3.80E-06  |
| DKKL1  | rs2303759   | 19 | 49365794  | G | T | 0.25 | -1.26 | 0.01 | 0.00E+00  |
| DLK1   | rs6772323   | 3  | 156509854 | C | A | 0.38 | 0.05  | 0.01 | 8.14E-06  |
| DLK1   | rs2074613   | 5  | 140334979 | T | C | 0.56 | -0.05 | 0.01 | 1.55E-06  |
| DLK1   | rs732194    | 6  | 100178468 | T | C | 0.48 | 0.06  | 0.01 | 1.45E-07  |
| DLK1   | rs10823391  | 10 | 69466688  | T | C | 0.47 | -0.06 | 0.01 | 1.96E-07  |
| DLK1   | rs10893501  | 11 | 126381138 | G | A | 0.13 | 0.07  | 0.01 | 1.06E-05  |
| DLK1   | rs12881760  | 14 | 100709998 | C | G | 0.67 | 0.49  | 0.01 | 0.00E+00  |
| DLK1   | rs112001035 | 17 | 68827664  | A | G | 0.06 | -0.22 | 0.01 | 3.54E-23  |
| DLL1   | rs61747728  | 1  | 179557079 | T | C | 0.04 | 0.18  | 0.02 | 1.89E-10  |
| DLL1   | rs9264625   | 6  | 31270183  | C | G | 0.63 | -0.08 | 0.01 | 9.14E-12  |
| DLL1   | rs9356631   | 6  | 170278382 | G | A | 0.41 | 0.15  | 0.01 | 1.79E-43  |
| DLL1   | rs8176672   | 9  | 133266772 | T | C | 0.06 | 0.18  | 0.01 | 6.75E-16  |
| DLL1   | rs139130389 | 11 | 72139110  | A | C | 0.07 | -0.27 | 0.01 | 5.42E-38  |

|        |             |    |           |   |   |      |       |      |           |
|--------|-------------|----|-----------|---|---|------|-------|------|-----------|
| DLL1   | rs7137828   | 12 | 111494996 | T | C | 0.52 | -0.05 | 0.01 | 2.83E-05  |
| DLL1   | -           | 16 | 20343260  | T | A | 0.18 | -0.07 | 0.01 | 8.48E-07  |
| DLL1   | rs3814995   | 19 | 35851310  | T | C | 0.31 | 0.06  | 0.01 | 5.37E-08  |
| DLL1   | rs2837988   | 21 | 41247617  | A | C | 0.36 | 0.09  | 0.01 | 7.91E-15  |
| DNAJA2 | rs342298    | 7  | 106733200 | T | C | 0.46 | -0.06 | 0.01 | 1.88E-07  |
| DNAJB1 | rs3811444   | 1  | 247876149 | T | C | 0.33 | -0.07 | 0.01 | 3.40E-09  |
| DNAJB1 | rs1354034   | 3  | 56815721  | C | T | 0.60 | 0.08  | 0.01 | 1.91E-13  |
| DNAJB1 | rs342293    | 7  | 106731773 | G | C | 0.46 | -0.05 | 0.01 | 3.06E-06  |
| DNAJB1 | rs10733789  | 10 | 63188924  | C | T | 0.31 | 0.06  | 0.01 | 4.73E-06  |
| DNAJB1 | rs60822569  | 12 | 54323724  | C | T | 0.55 | 0.05  | 0.01 | 2.17E-05  |
| DNAJB1 | rs11085896  | 19 | 14541074  | C | A | 0.61 | -0.05 | 0.01 | 6.87E-06  |
| DNAJB1 | rs9612021   | 22 | 43187592  | C | T | 0.67 | -0.09 | 0.01 | 6.71E-13  |
| DNAJB8 | rs12668458  | 7  | 157352780 | C | T | 0.46 | 0.08  | 0.01 | 1.46E-11  |
| DNAJB8 | rs112988467 | 14 | 106616753 | T | C | 0.27 | 0.06  | 0.01 | 2.39E-06  |
| DNER   | -           | 2  | 9967625   | C | T | 0.33 | 0.06  | 0.01 | 1.21E-07  |
| DNER   | rs34412673  | 2  | 229727643 | T | A | 0.33 | -0.28 | 0.01 | 1.29E-118 |
| DNER   | rs571492629 | 4  | 56899224  | T | C | 0.18 | 0.08  | 0.01 | 2.41E-08  |
| DNER   | rs9379084   | 6  | 7231610   | A | G | 0.11 | 0.09  | 0.01 | 6.85E-07  |
| DNER   | rs4740728   | 9  | 3733885   | T | C | 0.56 | -0.05 | 0.01 | 1.54E-05  |
| DNER   | rs62625031  | 10 | 69483873  | T | A | 0.04 | 0.14  | 0.02 | 6.21E-07  |
| DNER   | rs7298766   | 12 | 552490    | G | A | 0.29 | 0.05  | 0.01 | 1.03E-05  |
| DNER   | rs186021206 | 17 | 7166093   | A | G | 0.01 | 0.46  | 0.05 | 1.60E-09  |
| DNER   | rs8127156   | 21 | 41171476  | G | C | 0.26 | 0.10  | 0.01 | 1.91E-15  |
| DNMBP  | rs1354034   | 3  | 56815721  | C | T | 0.60 | 0.05  | 0.01 | 1.02E-05  |
| DNMBP  | rs114694170 | 5  | 88884379  | C | T | 0.06 | 0.12  | 0.02 | 9.41E-07  |
| DNMBP  | rs139736391 | 10 | 99692954  | T | C | 0.02 | -0.45 | 0.03 | 1.05E-22  |
| DNMBP  | rs60822569  | 12 | 54323724  | C | T | 0.55 | 0.05  | 0.01 | 4.54E-06  |
| DNPH1  | rs77321231  | 6  | 43232465  | T | C | 0.10 | -0.46 | 0.01 | 1.03E-141 |
| DOK2   | rs1354034   | 3  | 56815721  | C | T | 0.60 | 0.05  | 0.01 | 2.34E-05  |
| DOK2   | rs342298    | 7  | 106733200 | T | C | 0.46 | -0.05 | 0.01 | 7.32E-06  |
| DOK2   | rs67385415  | 8  | 21996222  | C | T | 0.45 | 0.06  | 0.01 | 9.68E-08  |
| DOK2   | rs6993770   | 8  | 105569300 | T | A | 0.29 | -0.09 | 0.01 | 1.66E-12  |
| DPEP1  | rs12508709  | 4  | 144398392 | T | C | 0.51 | 0.04  | 0.01 | 1.16E-06  |
| DPEP1  | rs10807578  | 6  | 14587916  | C | G | 0.80 | 0.05  | 0.01 | 1.05E-05  |
| DPEP1  | rs79137699  | 9  | 101486788 | C | T | 0.03 | -0.13 | 0.02 | 1.23E-07  |
| DPEP1  | rs115478735 | 9  | 133274295 | T | A | 0.18 | 0.05  | 0.01 | 4.71E-06  |
| DPEP1  | rs78689694  | 11 | 126364925 | C | G | 0.13 | -0.10 | 0.01 | 1.87E-15  |
| DPEP1  | rs423135    | 16 | 89674465  | A | G | 0.52 | 0.79  | 0.01 | 0.00E+00  |
| DPEP1  | rs186021206 | 17 | 7166093   | A | G | 0.01 | 0.98  | 0.04 | 2.63E-65  |
| DPEP1  | rs8111600   | 19 | 5821957   | T | C | 0.04 | 0.11  | 0.01 | 7.25E-07  |
| DPEP2  | rs148866368 | 6  | 32563805  | A | G | 0.55 | -0.05 | 0.01 | 1.89E-05  |
| DPEP2  | -           | 9  | 133263362 | G | A | 0.18 | -0.42 | 0.01 | 2.23E-187 |
| DPEP2  | rs7137828   | 12 | 111494996 | T | C | 0.52 | -0.06 | 0.01 | 1.29E-07  |
| DPEP2  | rs144339907 | 16 | 67992095  | C | A | 0.00 | -2.27 | 0.06 | 3.00E-135 |
| DPEP2  | rs186021206 | 17 | 7166093   | A | G | 0.01 | 0.66  | 0.05 | 4.65E-18  |
| DPP10  | rs12711819  | 2  | 115179094 | A | T | 0.50 | -0.26 | 0.01 | 1.50E-120 |
| DPP10  | rs77119371  | 4  | 56961571  | A | T | 0.19 | 0.06  | 0.01 | 1.88E-05  |
| DPP10  | rs56204645  | 8  | 54509209  | C | T | 0.21 | -0.09 | 0.01 | 6.53E-12  |
| DPP10  | rs2519093   | 9  | 133266456 | T | C | 0.18 | -0.12 | 0.01 | 3.48E-17  |
| DPP10  | rs56278466  | 10 | 17833858  | G | T | 0.66 | 0.12  | 0.01 | 7.09E-26  |
| DPP10  | rs200489612 | 17 | 7203059   | A | G | 0.01 | 0.36  | 0.05 | 1.64E-05  |
| DPP4   | rs13015258  | 2  | 162074215 | G | T | 0.62 | -0.22 | 0.01 | 1.69E-88  |
| DPP4   | rs7781670   | 7  | 12211934  | G | C | 0.42 | 0.07  | 0.01 | 4.40E-11  |
| DPP4   | rs1617484   | 7  | 65998108  | A | G | 0.54 | 0.06  | 0.01 | 6.26E-07  |
| DPP4   | rs35221426  | 12 | 20841602  | T | G | 0.15 | 0.07  | 0.01 | 2.77E-06  |
| DPP4   | rs2682725   | 12 | 64709452  | C | T | 0.60 | 0.07  | 0.01 | 7.20E-09  |

|        |             |    |           |   |   |      |       |      |           |
|--------|-------------|----|-----------|---|---|------|-------|------|-----------|
| DPP6   | rs567890117 | 1  | 161679960 | A | C | 0.50 | 0.05  | 0.01 | 1.15E-05  |
| DPP6   | rs2071592   | 6  | 31547563  | A | T | 0.35 | -0.06 | 0.01 | 9.74E-07  |
| DPP6   | rs2240046   | 7  | 20331650  | G | C | 0.06 | 0.11  | 0.01 | 4.51E-06  |
| DPP6   | rs3734960   | 7  | 154892443 | C | T | 0.26 | 0.26  | 0.01 | 4.00E-101 |
| DPP6   | rs550057    | 9  | 133271182 | T | C | 0.26 | -0.11 | 0.01 | 3.31E-18  |
| DPP6   | rs56278466  | 10 | 17833858  | G | T | 0.66 | 0.18  | 0.01 | 1.28E-54  |
| DPP6   | rs2289702   | 15 | 78944951  | T | C | 0.11 | 0.09  | 0.01 | 3.45E-07  |
| DPP6   | rs7285200   | 22 | 29342557  | T | C | 0.23 | -0.06 | 0.01 | 2.05E-05  |
| DPP7   | rs35457250  | 3  | 186620775 | T | C | 0.01 | 0.36  | 0.04 | 4.34E-11  |
| DPP7   | rs2073562   | 8  | 17885420  | G | A | 0.69 | 0.09  | 0.01 | 1.28E-14  |
| DPP7   | -           | 9  | 137114213 | C | A | 0.74 | 0.51  | 0.01 | 0.00E+00  |
| DPP7   | rs9414801   | 10 | 63389329  | A | G | 0.53 | -0.06 | 0.01 | 4.41E-09  |
| DPP7   | rs10778152  | 12 | 101831973 | G | A | 0.29 | -0.22 | 0.01 | 4.80E-85  |
| DPP7   | rs145078947 | 14 | 93186629  | T | G | 0.00 | 0.53  | 0.06 | 1.14E-07  |
| DPP7   | rs147233090 | 15 | 43735849  | T | C | 0.02 | 0.16  | 0.02 | 3.21E-06  |
| DPP7   | rs58542926  | 19 | 19268740  | T | C | 0.08 | 0.14  | 0.01 | 2.89E-13  |
| DPT    | rs1018454   | 1  | 168728523 | C | A | 0.58 | 0.33  | 0.01 | 9.84E-216 |
| DPT    | rs67409736  | 3  | 52517268  | T | G | 0.56 | 0.05  | 0.01 | 8.38E-07  |
| DPY30  | rs67550529  | 2  | 31944496  | C | T | 0.21 | 0.07  | 0.01 | 2.62E-06  |
| DPY30  | rs6993770   | 8  | 105569300 | T | A | 0.29 | -0.06 | 0.01 | 6.23E-06  |
| DRAXIN | rs6679089   | 1  | 11692083  | A | G | 0.06 | -0.60 | 0.02 | 7.62E-137 |
| DRAXIN | rs76529516  | 2  | 60356235  | G | A | 0.03 | 0.23  | 0.02 | 3.59E-12  |
| DRAXIN | rs13063578  | 3  | 47046347  | A | T | 0.40 | -0.07 | 0.01 | 3.01E-11  |
| DRAXIN | rs10002742  | 4  | 140099011 | A | G | 0.44 | -0.05 | 0.01 | 3.87E-06  |
| DRAXIN | rs17361097  | 4  | 152080067 | A | G | 0.44 | 0.06  | 0.01 | 6.33E-08  |
| DRAXIN | rs304153    | 5  | 88825371  | A | T | 0.31 | 0.07  | 0.01 | 2.91E-09  |
| DRAXIN | rs180798958 | 5  | 143809411 | A | G | 0.02 | -0.20 | 0.03 | 9.55E-07  |
| DRAXIN | rs4704963   | 5  | 158820370 | C | T | 0.08 | -0.19 | 0.01 | 3.59E-22  |
| DRAXIN | rs652951    | 6  | 44596271  | A | C | 0.49 | -0.05 | 0.01 | 4.67E-07  |
| DRAXIN | rs9483788   | 6  | 135114363 | C | T | 0.26 | -0.06 | 0.01 | 3.03E-06  |
| DRAXIN | rs60160896  | 7  | 55979879  | T | C | 0.41 | 0.06  | 0.01 | 3.45E-09  |
| DRAXIN | rs62621812  | 7  | 127375029 | A | G | 0.02 | 0.27  | 0.02 | 7.36E-13  |
| DRAXIN | rs10107630  | 8  | 129591389 | T | C | 0.57 | 0.08  | 0.01 | 3.48E-13  |
| DRAXIN | -           | 10 | 61976858  | C | T | 0.65 | -0.10 | 0.01 | 1.81E-18  |
| DRAXIN | rs11410806  | 15 | 81552430  | A | T | 0.19 | 0.07  | 0.01 | 3.55E-07  |
| DRAXIN | rs9927316   | 16 | 85982795  | G | C | 0.24 | 0.09  | 0.01 | 1.50E-12  |
| DRAXIN | rs7508294   | 19 | 33252791  | A | G | 0.34 | 0.06  | 0.01 | 3.86E-08  |
| DRAXIN | rs681343    | 19 | 48703205  | T | C | 0.51 | 0.06  | 0.01 | 3.83E-09  |
| DRG2   | rs1354034   | 3  | 56815721  | C | T | 0.60 | 0.07  | 0.01 | 1.40E-08  |
| DRG2   | rs17622656  | 5  | 132485305 | A | G | 0.39 | -0.05 | 0.01 | 2.01E-05  |
| DRG2   | rs147899431 | 6  | 116571518 | C | G | 0.04 | 0.27  | 0.02 | 5.83E-22  |
| DRG2   | rs60822569  | 12 | 54323724  | C | T | 0.55 | 0.05  | 0.01 | 1.39E-05  |
| DSC2   | rs61747728  | 1  | 179557079 | T | C | 0.04 | 0.19  | 0.02 | 8.74E-11  |
| DSC2   | rs8176672   | 9  | 133266772 | T | C | 0.06 | 0.13  | 0.01 | 3.26E-08  |
| DSC2   | rs56278466  | 10 | 17833858  | G | T | 0.66 | 0.06  | 0.01 | 3.41E-08  |
| DSC2   | rs745680717 | 12 | 480706    | C | G | 0.40 | -0.06 | 0.01 | 5.61E-07  |
| DSC2   | rs111338191 | 12 | 111388673 | T | A | 0.52 | -0.06 | 0.01 | 6.45E-08  |
| DSC2   | -           | 16 | 20343260  | T | A | 0.18 | -0.08 | 0.01 | 2.14E-07  |
| DSC2   | rs186021206 | 17 | 7166093   | A | G | 0.01 | 0.40  | 0.05 | 1.46E-07  |
| DSC2   | rs2302774   | 17 | 40026837  | T | G | 0.38 | -0.05 | 0.01 | 1.21E-05  |
| DSC2   | rs2665405   | 17 | 59797931  | A | G | 0.55 | 0.10  | 0.01 | 5.83E-20  |
| DSC2   | rs4799305   | 18 | 31109181  | A | G | 0.88 | -0.34 | 0.01 | 1.99E-84  |
| DSC2   | rs3814995   | 19 | 35851310  | T | C | 0.31 | 0.09  | 0.01 | 1.13E-13  |
| DSC2   | rs516316    | 19 | 48702888  | C | G | 0.51 | -0.09 | 0.01 | 3.92E-17  |
| DSG2   | rs61747728  | 1  | 179557079 | T | C | 0.04 | 0.15  | 0.02 | 8.14E-08  |
| DSG2   | rs13127398  | 4  | 102000547 | A | T | 0.07 | 0.11  | 0.01 | 7.45E-07  |

|       |             |    |           |   |   |      |       |      |           |
|-------|-------------|----|-----------|---|---|------|-------|------|-----------|
| DSG2  | rs998584    | 6  | 43790159  | A | C | 0.48 | -0.08 | 0.01 | 7.86E-14  |
| DSG2  | rs648802    | 6  | 138092196 | C | G | 0.54 | -0.14 | 0.01 | 2.50E-37  |
| DSG2  | rs8176741   | 9  | 133256074 | A | G | 0.06 | 0.42  | 0.01 | 1.33E-77  |
| DSG2  | rs1716403   | 12 | 124035299 | C | T | 0.68 | -0.05 | 0.01 | 2.02E-05  |
| DSG2  | rs186021206 | 17 | 7166093   | A | G | 0.01 | 0.32  | 0.05 | 1.87E-05  |
| DSG2  | rs2704053   | 18 | 31515126  | G | A | 0.48 | -0.22 | 0.01 | 1.23E-90  |
| DSG2  | rs708686    | 19 | 5840608   | T | C | 0.27 | 0.11  | 0.01 | 3.86E-19  |
| DSG2  | rs3814995   | 19 | 35851310  | T | C | 0.32 | 0.06  | 0.01 | 2.12E-07  |
| DSG3  | rs80293268  | 1  | 8147519   | C | G | 0.05 | -0.19 | 0.02 | 3.59E-13  |
| DSG3  | rs61816761  | 1  | 152313385 | A | G | 0.02 | 0.24  | 0.02 | 8.24E-11  |
| DSG3  | rs1260326   | 2  | 27508073  | C | T | 0.61 | 0.08  | 0.01 | 3.74E-13  |
| DSG3  | rs1440152   | 3  | 98771071  | G | C | 0.44 | 0.05  | 0.01 | 1.15E-05  |
| DSG3  | rs833270    | 3  | 181802378 | C | T | 0.62 | 0.06  | 0.01 | 2.39E-08  |
| DSG3  | rs73187740  | 3  | 186938218 | C | G | 0.06 | 0.10  | 0.01 | 2.09E-05  |
| DSG3  | rs13107325  | 4  | 102267552 | T | C | 0.08 | 0.16  | 0.01 | 4.48E-16  |
| DSG3  | rs7905367   | 10 | 52574893  | C | G | 0.80 | 0.07  | 0.01 | 1.49E-07  |
| DSG3  | rs683486    | 11 | 126356768 | A | C | 0.40 | 0.06  | 0.01 | 3.80E-09  |
| DSG3  | rs2286782   | 12 | 519070    | A | C | 0.22 | -0.09 | 0.01 | 2.18E-11  |
| DSG3  | rs12306780  | 12 | 89528083  | T | A | 0.35 | 0.18  | 0.01 | 2.03E-60  |
| DSG3  | rs34177108  | 16 | 89826967  | A | C | 0.27 | 0.05  | 0.01 | 5.40E-06  |
| DSG3  | rs186021206 | 17 | 7166093   | A | G | 0.01 | 0.80  | 0.05 | 5.52E-29  |
| DSG3  | rs7234091   | 18 | 31439866  | T | C | 0.18 | -0.31 | 0.01 | 5.53E-113 |
| DSG3  | rs12457893  | 18 | 63258928  | C | A | 0.46 | -0.05 | 0.01 | 8.01E-06  |
| DSG3  | rs3814995   | 19 | 35851310  | T | C | 0.31 | 0.07  | 0.01 | 1.13E-09  |
| DSG3  | rs2682581   | 19 | 43462354  | G | C | 0.53 | -0.07 | 0.01 | 5.65E-12  |
| DSG4  | rs80293268  | 1  | 8147519   | C | G | 0.05 | -0.21 | 0.02 | 1.68E-14  |
| DSG4  | rs12142181  | 1  | 41447314  | T | C | 0.08 | 0.09  | 0.01 | 1.31E-05  |
| DSG4  | rs11589479  | 1  | 155060832 | A | G | 0.16 | -0.08 | 0.01 | 1.24E-07  |
| DSG4  | rs1260326   | 2  | 27508073  | C | T | 0.61 | 0.06  | 0.01 | 7.57E-08  |
| DSG4  | -           | 3  | 11620052  | C | G | 0.73 | -0.06 | 0.01 | 3.81E-07  |
| DSG4  | rs1345417   | 3  | 181794163 | G | C | 0.60 | 0.08  | 0.01 | 5.56E-13  |
| DSG4  | rs13107325  | 4  | 102267552 | T | C | 0.08 | 0.12  | 0.01 | 5.27E-08  |
| DSG4  | rs62370336  | 5  | 53861705  | G | A | 0.14 | -0.08 | 0.01 | 3.04E-06  |
| DSG4  | rs2436396   | 5  | 140153978 | G | A | 0.70 | -0.09 | 0.01 | 5.62E-13  |
| DSG4  | rs12203592  | 6  | 396321    | T | C | 0.22 | -0.06 | 0.01 | 3.43E-06  |
| DSG4  | rs9358325   | 6  | 10259504  | T | A | 0.83 | -0.08 | 0.01 | 7.98E-08  |
| DSG4  | -           | 6  | 21921876  | T | G | 0.15 | 0.07  | 0.01 | 9.70E-06  |
| DSG4  | rs1918719   | 8  | 116293163 | C | T | 0.20 | -0.08 | 0.01 | 2.46E-09  |
| DSG4  | -           | 9  | 22071285  | C | T | 0.54 | 0.05  | 0.01 | 1.29E-05  |
| DSG4  | rs7905367   | 10 | 52574893  | C | G | 0.80 | 0.10  | 0.01 | 3.34E-13  |
| DSG4  | rs2286782   | 12 | 519070    | A | C | 0.22 | -0.17 | 0.01 | 4.24E-36  |
| DSG4  | rs12426301  | 12 | 53855627  | T | C | 0.20 | 0.12  | 0.01 | 4.42E-18  |
| DSG4  | rs1800176   | 12 | 57167668  | T | C | 0.31 | 0.07  | 0.01 | 5.67E-09  |
| DSG4  | rs7973165   | 12 | 90740429  | C | T | 0.27 | 0.07  | 0.01 | 7.59E-09  |
| DSG4  | rs369230    | 16 | 89579029  | T | G | 0.69 | -0.05 | 0.01 | 2.16E-05  |
| DSG4  | rs9896243   | 17 | 46748690  | G | C | 0.22 | 0.10  | 0.01 | 1.37E-12  |
| DSG4  | rs55842605  | 17 | 78941609  | T | C | 0.55 | 0.07  | 0.01 | 3.78E-10  |
| DSG4  | rs34620697  | 18 | 31403566  | T | C | 0.01 | -0.37 | 0.05 | 3.76E-07  |
| DSG4  | rs8084922   | 18 | 63263288  | C | G | 0.47 | -0.08 | 0.01 | 1.57E-12  |
| DSG4  | rs4803461   | 19 | 41402966  | A | G | 0.60 | -0.05 | 0.01 | 8.54E-06  |
| DTX3  | rs542212699 | 1  | 223712908 | A | G | 0.01 | -0.67 | 0.04 | 1.18E-32  |
| DTX3  | rs151828    | 5  | 96724558  | C | T | 0.55 | 0.16  | 0.01 | 3.98E-50  |
| DTX3  | rs2232659   | 10 | 103449656 | T | C | 0.02 | 0.18  | 0.03 | 1.08E-05  |
| DTX3  | rs2277323   | 12 | 57615589  | A | G | 0.25 | -0.11 | 0.01 | 4.31E-18  |
| DUSP3 | rs10733789  | 10 | 63188924  | C | T | 0.31 | 0.07  | 0.01 | 1.63E-07  |
| DUSP3 | rs187793617 | 14 | 105894833 | G | C | 0.16 | 0.09  | 0.01 | 2.80E-08  |

|           |             |    |           |   |   |      |       |      |           |
|-----------|-------------|----|-----------|---|---|------|-------|------|-----------|
| EBAG9     | rs1354034   | 3  | 56815721  | C | T | 0.60 | 0.08  | 0.01 | 2.06E-12  |
| EBAG9     | rs17622656  | 5  | 132485305 | A | G | 0.39 | -0.05 | 0.01 | 1.06E-05  |
| EBAG9     | rs342293    | 7  | 106731773 | G | C | 0.46 | -0.05 | 0.01 | 6.21E-06  |
| EBAG9     | rs6993770   | 8  | 105569300 | T | A | 0.29 | -0.07 | 0.01 | 1.09E-07  |
| EBAG9     | rs2022934   | 8  | 109555545 | A | G | 0.39 | -0.07 | 0.01 | 7.74E-09  |
| EBI3_IL27 | rs4970836   | 1  | 109279175 | A | G | 0.77 | 0.07  | 0.01 | 2.92E-08  |
| EBI3_IL27 | rs10183338  | 2  | 110853239 | T | G | 0.29 | -0.05 | 0.01 | 1.11E-05  |
| EBI3_IL27 | rs62165726  | 2  | 134208991 | A | C | 0.04 | -0.28 | 0.02 | 7.83E-24  |
| EBI3_IL27 | rs11456863  | 3  | 12230418  | T | A | 0.35 | 0.05  | 0.01 | 7.45E-06  |
| EBI3_IL27 | rs10513801  | 3  | 186104564 | G | T | 0.14 | 0.07  | 0.01 | 2.26E-05  |
| EBI3_IL27 | rs11713634  | 3  | 194340849 | A | G | 0.28 | -0.13 | 0.01 | 1.65E-29  |
| EBI3_IL27 | rs5743618   | 4  | 38797027  | A | C | 0.22 | 0.11  | 0.01 | 1.71E-19  |
| EBI3_IL27 | rs115216147 | 5  | 71369699  | A | T | 0.07 | 0.09  | 0.01 | 2.20E-05  |
| EBI3_IL27 | rs4713572   | 6  | 32659175  | C | T | 0.40 | 0.07  | 0.01 | 2.34E-10  |
| EBI3_IL27 | rs2529440   | 7  | 30472178  | T | C | 0.44 | 0.05  | 0.01 | 6.23E-06  |
| EBI3_IL27 | rs339060    | 7  | 128735549 | G | A | 0.55 | 0.06  | 0.01 | 6.73E-08  |
| EBI3_IL27 | rs4986790   | 9  | 117713024 | G | A | 0.06 | -0.12 | 0.01 | 1.09E-07  |
| EBI3_IL27 | rs4486555   | 10 | 100039545 | T | G | 0.41 | -0.19 | 0.01 | 8.79E-72  |
| EBI3_IL27 | rs61377406  | 11 | 122664422 | T | G | 0.36 | -0.06 | 0.01 | 1.71E-07  |
| EBI3_IL27 | rs12810719  | 12 | 29325081  | G | A | 0.23 | 0.06  | 0.01 | 2.61E-06  |
| EBI3_IL27 | rs58298943  | 12 | 56997508  | T | C | 0.08 | 0.08  | 0.01 | 1.15E-05  |
| EBI3_IL27 | rs3184504   | 12 | 111446804 | C | T | 0.52 | -0.08 | 0.01 | 3.71E-14  |
| EBI3_IL27 | rs72749499  | 15 | 57003381  | G | A | 0.07 | 0.09  | 0.01 | 2.29E-05  |
| EBI3_IL27 | -           | 16 | 28501747  | A | T | 0.34 | -0.07 | 0.01 | 2.74E-10  |
| EBI3_IL27 | rs186021206 | 17 | 7166093   | A | G | 0.01 | 0.82  | 0.05 | 1.94E-30  |
| EBI3_IL27 | rs704       | 17 | 28367840  | A | G | 0.47 | -0.10 | 0.01 | 7.58E-21  |
| EBI3_IL27 | -           | 19 | 4240307   | C | A | 0.29 | -0.41 | 0.01 | 2.19E-269 |
| EBI3_IL27 | rs4804669   | 19 | 12391643  | G | A | 0.78 | -0.10 | 0.01 | 1.31E-13  |
| EBI3_IL27 | rs7264079   | 20 | 35567019  | C | G | 0.14 | 0.10  | 0.01 | 6.73E-11  |
| ECE1      | rs181637959 | 1  | 21219540  | T | A | 0.01 | -1.03 | 0.05 | 5.27E-46  |
| ECE1      | rs147953260 | 3  | 52520515  | A | G | 0.00 | 0.59  | 0.07 | 2.60E-07  |
| ECE1      | -           | 9  | 133263362 | G | A | 0.18 | -0.39 | 0.01 | 1.06E-149 |
| ECE1      | rs181242111 | 10 | 17823665  | A | G | 0.12 | 0.08  | 0.01 | 1.62E-05  |
| ECE1      | rs35166255  | 11 | 126431861 | A | G | 0.03 | 0.23  | 0.02 | 1.48E-12  |
| ECE1      | rs186021206 | 17 | 7166093   | A | G | 0.01 | 0.53  | 0.05 | 1.73E-11  |
| EDA2R     | rs4335411   | 1  | 248897507 | A | G | 0.76 | -0.06 | 0.01 | 6.69E-08  |
| EDA2R     | rs10069690  | 5  | 1279675   | T | C | 0.26 | -0.05 | 0.01 | 3.49E-06  |
| EDA2R     | rs78378222  | 17 | 7668434   | G | T | 0.01 | -0.26 | 0.03 | 1.52E-10  |
| EDAR      | rs72665955  | 1  | 54375983  | A | G | 0.12 | 0.13  | 0.01 | 1.90E-14  |
| EDAR      | rs66858280  | 1  | 247878519 | G | C | 0.31 | -0.05 | 0.01 | 1.31E-05  |
| EDAR      | rs12712870  | 2  | 42934040  | G | A | 0.69 | 0.09  | 0.01 | 9.10E-15  |
| EDAR      | rs140661471 | 2  | 108987283 | A | G | 0.01 | 1.64  | 0.03 | 5.86E-261 |
| EDAR      | rs28362642  | 3  | 39108012  | G | A | 0.11 | 0.08  | 0.01 | 5.09E-06  |
| EDAR      | rs1420476   | 3  | 169146762 | A | T | 0.96 | -0.14 | 0.02 | 8.94E-08  |
| EDAR      | rs17501461  | 4  | 105068616 | T | C | 0.17 | 0.07  | 0.01 | 8.93E-06  |
| EDAR      | rs114694170 | 5  | 88884379  | C | T | 0.06 | -0.21 | 0.01 | 3.55E-19  |
| EDAR      | rs139141690 | 7  | 101856650 | A | G | 0.00 | -0.36 | 0.05 | 1.15E-05  |
| EDAR      | rs67036916  | 7  | 106727190 | A | G | 0.46 | 0.07  | 0.01 | 1.70E-11  |
| EDAR      | rs6993770   | 8  | 105569300 | T | A | 0.29 | 0.23  | 0.01 | 2.49E-80  |
| EDAR      | rs692502    | 9  | 4745645   | A | G | 0.56 | 0.05  | 0.01 | 7.06E-06  |
| EDAR      | rs12377089  | 9  | 134076173 | G | A | 0.32 | -0.11 | 0.01 | 5.00E-20  |
| EDAR      | rs7080386   | 10 | 63288546  | A | C | 0.41 | 0.12  | 0.01 | 4.28E-26  |
| EDAR      | rs16937003  | 10 | 79178742  | A | G | 0.02 | -0.17 | 0.03 | 2.16E-05  |
| EDAR      | rs12762934  | 10 | 102600127 | T | C | 0.32 | -0.15 | 0.01 | 2.75E-36  |
| EDAR      | rs652963    | 11 | 32890191  | T | C | 0.84 | 0.08  | 0.01 | 6.08E-08  |
| EDAR      | rs780615646 | 11 | 128703863 | A | C | 0.78 | -0.06 | 0.01 | 5.42E-06  |

|        |             |    |           |   |   |      |       |      |           |
|--------|-------------|----|-----------|---|---|------|-------|------|-----------|
| EDAR   | rs11553699  | 12 | 121779004 | G | A | 0.14 | -0.10 | 0.01 | 3.33E-09  |
| EDAR   | rs141232262 | 14 | 68092020  | G | A | 0.15 | -0.07 | 0.01 | 4.78E-06  |
| EDAR   | rs1820994   | 15 | 57005581  | G | A | 0.79 | 0.10  | 0.01 | 4.45E-15  |
| EDAR   | rs8057254   | 16 | 8959132   | A | T | 0.19 | 0.08  | 0.01 | 7.31E-09  |
| EDAR   | rs74035509  | 16 | 88500925  | T | C | 0.08 | -0.21 | 0.01 | 3.14E-24  |
| EDAR   | rs111527738 | 21 | 34887027  | G | A | 0.02 | -0.23 | 0.02 | 1.67E-09  |
| EDIL3  | rs56210800  | 3  | 124753745 | G | C | 0.13 | -0.16 | 0.01 | 2.14E-21  |
| EDIL3  | -           | 5  | 84018783  | C | T | 0.23 | -0.10 | 0.01 | 1.27E-12  |
| EDIL3  | rs111338191 | 12 | 111388673 | T | A | 0.52 | 0.05  | 0.01 | 8.61E-06  |
| EDIL3  | rs1801690   | 17 | 66212167  | G | C | 0.06 | 0.11  | 0.02 | 5.89E-06  |
| EDIL3  | rs34931250  | 17 | 68883786  | T | C | 0.06 | 0.26  | 0.02 | 1.29E-27  |
| EFEMP1 | rs188468174 | 1  | 24965206  | T | C | 0.01 | -0.23 | 0.03 | 4.45E-07  |
| EFEMP1 | rs1260326   | 2  | 27508073  | C | T | 0.61 | 0.05  | 0.01 | 5.00E-07  |
| EFEMP1 | rs59985551  | 2  | 55879793  | T | C | 0.23 | 0.22  | 0.01 | 8.83E-72  |
| EFEMP1 | rs2070634   | 3  | 186618238 | G | T | 0.51 | 0.05  | 0.01 | 3.74E-06  |
| EFNA1  | rs4390169   | 1  | 155133578 | G | A | 0.52 | 0.31  | 0.01 | 1.11E-170 |
| EFNA1  | -           | 1  | 172422763 | A | G | 0.55 | -0.06 | 0.01 | 3.68E-08  |
| EFNA1  | rs28817415  | 4  | 76480299  | T | C | 0.46 | 0.06  | 0.01 | 5.41E-08  |
| EFNA1  | rs174581    | 11 | 61839211  | A | G | 0.35 | 0.05  | 0.01 | 1.59E-05  |
| EFNA1  | rs28929474  | 14 | 94378610  | T | C | 0.02 | 0.19  | 0.03 | 1.46E-06  |
| EFNA4  | rs148289726 | 1  | 155066794 | T | C | 0.00 | -1.28 | 0.08 | 6.68E-28  |
| EFNA4  | rs6737671   | 2  | 221522212 | C | T | 0.51 | 0.06  | 0.01 | 2.38E-07  |
| EFNA4  | rs3184504   | 12 | 111446804 | C | T | 0.52 | -0.06 | 0.01 | 4.01E-08  |
| EFNA4  | rs7187875   | 16 | 363747    | G | A | 0.54 | -0.06 | 0.01 | 8.27E-08  |
| EFNA4  | -           | 16 | 20343260  | T | A | 0.18 | -0.08 | 0.01 | 8.99E-08  |
| EFNA4  | rs4760      | 19 | 43648948  | G | A | 0.16 | 0.09  | 0.01 | 9.66E-09  |
| EGF    | rs10016018  | 4  | 101873464 | T | A | 0.40 | -0.07 | 0.01 | 5.20E-09  |
| EGF    | rs3831508   | 4  | 109916747 | T | G | 0.40 | 0.13  | 0.01 | 3.26E-30  |
| EGF    | rs2631367   | 5  | 132369766 | G | C | 0.52 | 0.06  | 0.01 | 1.63E-07  |
| EGF    | rs6961069   | 7  | 80589645  | T | C | 0.40 | 0.06  | 0.01 | 4.40E-08  |
| EGF    | rs6993770   | 8  | 105569300 | T | A | 0.29 | -0.09 | 0.01 | 1.70E-13  |
| EGF    | rs10820606  | 9  | 96430637  | C | A | 0.23 | -0.07 | 0.01 | 1.46E-06  |
| EGF    | rs7896518   | 10 | 63344740  | G | A | 0.42 | 0.09  | 0.01 | 1.21E-13  |
| EGF    | rs1362213   | 12 | 6173262   | T | C | 0.48 | -0.06 | 0.01 | 6.13E-07  |
| EGF    | rs12445050  | 16 | 81837364  | T | C | 0.14 | 0.09  | 0.01 | 3.57E-08  |
| EGF    | rs892090    | 19 | 55027704  | G | T | 0.83 | 0.15  | 0.01 | 1.36E-21  |
| EGF    | rs6081565   | 20 | 19307260  | A | G | 0.35 | 0.06  | 0.01 | 7.51E-07  |
| EGFL7  | rs78945826  | 1  | 25730925  | C | A | 0.03 | -0.15 | 0.02 | 2.66E-05  |
| EGFL7  | rs1434282   | 1  | 199041592 | T | C | 0.73 | 0.05  | 0.01 | 2.33E-05  |
| EGFL7  | rs823066    | 1  | 205802045 | G | A | 0.95 | -0.11 | 0.02 | 1.39E-05  |
| EGFL7  | rs78909033  | 2  | 240571486 | A | G | 0.14 | -0.07 | 0.01 | 5.80E-06  |
| EGFL7  | rs114694170 | 5  | 88884379  | C | T | 0.06 | 0.11  | 0.02 | 7.38E-06  |
| EGFL7  | rs3131622   | 6  | 31452723  | G | T | 0.45 | 0.07  | 0.01 | 7.02E-09  |
| EGFL7  | rs6796      | 7  | 6462736   | C | T | 0.28 | -0.17 | 0.01 | 2.41E-41  |
| EGFL7  | rs10266182  | 7  | 35707715  | A | G | 0.38 | -0.08 | 0.01 | 3.52E-13  |
| EGFL7  | rs17154155  | 7  | 80604927  | T | G | 0.41 | 0.05  | 0.01 | 3.04E-06  |
| EGFL7  | rs339061    | 7  | 128733774 | C | T | 0.55 | -0.05 | 0.01 | 5.77E-06  |
| EGFL7  | rs883006    | 8  | 33436909  | G | C | 0.56 | -0.07 | 0.01 | 1.03E-09  |
| EGFL7  | rs8193003   | 9  | 132990109 | C | T | 0.61 | 0.06  | 0.01 | 5.07E-07  |
| EGFL7  | rs74557797  | 9  | 136656051 | T | G | 0.09 | -0.28 | 0.01 | 2.32E-42  |
| EGFL7  | rs10761731  | 10 | 63267850  | T | A | 0.41 | 0.07  | 0.01 | 2.39E-09  |
| EGFL7  | rs55646096  | 11 | 65151043  | T | C | 0.18 | -0.16 | 0.01 | 2.27E-29  |
| EGFL7  | rs9635249   | 14 | 65331066  | G | A | 0.79 | 0.08  | 0.01 | 7.04E-08  |
| EGFL7  | rs12444373  | 16 | 88498177  | G | C | 0.04 | 0.15  | 0.02 | 5.66E-07  |
| EGFL7  | rs892090    | 19 | 55027704  | G | T | 0.83 | 0.11  | 0.01 | 3.63E-14  |
| EGFR   | rs1260326   | 2  | 27508073  | C | T | 0.61 | -0.05 | 0.01 | 1.86E-05  |

|        |             |    |           |   |   |      |       |      |           |
|--------|-------------|----|-----------|---|---|------|-------|------|-----------|
| EGFR   | -           | 3  | 136181921 | A | T | 0.70 | 0.05  | 0.01 | 8.75E-06  |
| EGFR   | rs34241405  | 6  | 32593810  | A | G | 0.32 | -0.05 | 0.01 | 1.31E-05  |
| EGFR   | rs10081281  | 7  | 55169103  | T | C | 0.45 | 0.17  | 0.01 | 1.57E-54  |
| EGFR   | rs199922514 | 8  | 9325592   | G | A | 0.91 | -0.11 | 0.01 | 7.66E-09  |
| EGFR   | rs28601761  | 8  | 125487789 | G | C | 0.42 | -0.05 | 0.01 | 2.03E-05  |
| EGFR   | rs77582897  | 10 | 17850189  | C | T | 0.52 | 0.05  | 0.01 | 2.71E-05  |
| EGFR   | rs3967200   | 11 | 126362490 | T | C | 0.13 | -0.09 | 0.01 | 1.26E-08  |
| EGFR   | rs540639423 | 12 | 111407152 | T | C | 0.01 | -0.28 | 0.04 | 9.48E-06  |
| EGFR   | rs186021206 | 17 | 7166093   | A | G | 0.01 | 0.62  | 0.05 | 1.88E-16  |
| EGLN1  | rs1434282   | 1  | 199041592 | T | C | 0.73 | 0.08  | 0.01 | 9.37E-11  |
| EGLN1  | rs77466488  | 1  | 231488623 | G | A | 0.04 | 0.34  | 0.02 | 1.61E-30  |
| EGLN1  | rs519417    | 6  | 31910656  | A | G | 0.13 | -0.07 | 0.01 | 1.10E-05  |
| EGLN1  | rs342296    | 7  | 106732457 | A | G | 0.46 | -0.08 | 0.01 | 1.22E-11  |
| EIF4B  | rs1354034   | 3  | 56815721  | C | T | 0.60 | 0.08  | 0.01 | 4.76E-13  |
| EIF4B  | rs342298    | 7  | 106733200 | T | C | 0.45 | -0.06 | 0.01 | 7.92E-07  |
| EIF4B  | rs10733789  | 10 | 63188924  | C | T | 0.31 | 0.06  | 0.01 | 1.97E-06  |
| EIF4B  | rs11502185  | 11 | 180258    | C | T | 0.26 | 0.07  | 0.01 | 2.00E-06  |
| EIF4B  | rs60822569  | 12 | 54323724  | C | T | 0.55 | 0.05  | 0.01 | 4.67E-06  |
| EIF4G1 | rs1354034   | 3  | 56815721  | C | T | 0.60 | 0.09  | 0.01 | 8.70E-15  |
| EIF4G1 | rs342298    | 7  | 106733200 | T | C | 0.46 | -0.06 | 0.01 | 1.45E-06  |
| EIF4G1 | rs6993770   | 8  | 105569300 | T | A | 0.29 | -0.06 | 0.01 | 8.86E-06  |
| EIF4G1 | -           | 10 | 63156270  | A | T | 0.49 | 0.05  | 0.01 | 8.53E-06  |
| ELOA   | rs2473378   | 1  | 23724245  | A | G | 0.59 | 0.08  | 0.01 | 2.50E-13  |
| ELOA   | rs10418046  | 19 | 53824615  | G | T | 0.21 | 0.14  | 0.01 | 2.35E-25  |
| ENAH   | -           | 1  | 199025567 | T | A | 0.72 | 0.06  | 0.01 | 1.52E-05  |
| ENAH   | rs10799316  | 1  | 225480329 | A | G | 0.75 | 0.12  | 0.01 | 2.75E-19  |
| ENAH   | rs11438680  | 10 | 63414938  | A | G | 0.46 | 0.06  | 0.01 | 7.64E-07  |
| ENG    | rs61762319  | 3  | 155084189 | G | A | 0.03 | -0.21 | 0.02 | 2.27E-11  |
| ENG    | rs6437412   | 3  | 194747684 | C | T | 0.29 | 0.06  | 0.01 | 1.95E-07  |
| ENG    | rs9987289   | 8  | 9325848   | G | A | 0.91 | -0.08 | 0.01 | 1.99E-05  |
| ENG    | rs11794565  | 9  | 127838998 | T | C | 0.46 | 0.26  | 0.01 | 5.12E-111 |
| ENG    | rs2519093   | 9  | 133266456 | T | C | 0.18 | -0.50 | 0.01 | 4.86E-256 |
| ENG    | rs35166255  | 11 | 126431861 | A | G | 0.03 | 0.29  | 0.02 | 1.75E-22  |
| ENG    | rs186021206 | 17 | 7166093   | A | G | 0.01 | 0.72  | 0.05 | 9.52E-23  |
| ENG    | rs4760      | 19 | 43648948  | G | A | 0.16 | 0.24  | 0.01 | 6.23E-60  |
| ENG    | rs558698413 | 20 | 35120761  | A | C | 0.00 | -0.99 | 0.12 | 2.38E-07  |
| ENO1   | rs11544513  | 1  | 8866415   | T | G | 0.00 | -1.29 | 0.06 | 5.13E-39  |
| ENO1   | rs1354034   | 3  | 56815721  | C | T | 0.60 | 0.06  | 0.01 | 7.00E-08  |
| ENO1   | rs17622656  | 5  | 132485305 | A | G | 0.39 | -0.05 | 0.01 | 1.61E-05  |
| ENO1   | rs4746204   | 10 | 63568758  | T | C | 0.48 | -0.05 | 0.01 | 2.08E-05  |
| ENO2   | rs1354034   | 3  | 56815721  | C | T | 0.60 | 0.06  | 0.01 | 9.19E-07  |
| ENO2   | rs6993770   | 8  | 105569300 | T | A | 0.29 | -0.14 | 0.01 | 4.07E-31  |
| ENO2   | rs60757417  | 9  | 132989049 | G | C | 0.06 | -0.11 | 0.02 | 4.96E-06  |
| ENO2   | rs7080386   | 10 | 63288546  | A | C | 0.41 | 0.10  | 0.01 | 4.22E-20  |
| ENO2   | rs17655730  | 11 | 270715    | C | T | 0.25 | 0.06  | 0.01 | 1.05E-05  |
| ENO2   | rs11446182  | 12 | 6913195   | G | A | 0.27 | 0.15  | 0.01 | 4.77E-31  |
| ENPP2  | rs34707604  | 4  | 68625738  | C | T | 0.26 | 0.06  | 0.01 | 3.85E-07  |
| ENPP2  | rs4921913   | 8  | 18414867  | T | C | 0.78 | 0.07  | 0.01 | 1.48E-09  |
| ENPP2  | rs13267597  | 8  | 119641985 | G | T | 0.33 | -0.26 | 0.01 | 1.36E-150 |
| ENPP2  | rs10901252  | 9  | 133252613 | C | G | 0.06 | 0.10  | 0.01 | 2.45E-07  |
| ENPP2  | rs11830764  | 12 | 111077216 | C | G | 0.07 | -0.11 | 0.01 | 3.93E-09  |
| ENPP2  | rs7970695   | 12 | 120985573 | A | G | 0.62 | 0.09  | 0.01 | 7.89E-23  |
| ENPP2  | rs186021206 | 17 | 7166093   | A | G | 0.01 | 0.34  | 0.04 | 4.68E-08  |
| ENPP2  | rs77542162  | 17 | 69085137  | G | A | 0.02 | 0.14  | 0.02 | 1.93E-06  |
| ENPP5  | rs4665972   | 2  | 27375230  | C | T | 0.61 | 0.04  | 0.01 | 3.25E-06  |
| ENPP5  | rs9472701   | 6  | 46148712  | A | G | 0.64 | -0.77 | 0.01 | 0.00E+00  |

|        |             |    |           |   |   |      |       |      |           |
|--------|-------------|----|-----------|---|---|------|-------|------|-----------|
| ENPP5  | rs1299525   | 8  | 11864616  | T | C | 0.43 | 0.04  | 0.00 | 9.48E-07  |
| ENPP5  | rs75491173  | 11 | 16346948  | A | G | 0.06 | 0.08  | 0.01 | 1.14E-06  |
| ENPP5  | rs11072817  | 15 | 78944473  | A | G | 0.70 | 0.05  | 0.01 | 1.02E-09  |
| ENPP5  | rs12903256  | 15 | 84764910  | T | G | 0.34 | -0.04 | 0.01 | 1.20E-07  |
| ENPP5  | rs200489612 | 17 | 7203059   | A | G | 0.01 | 0.35  | 0.04 | 7.03E-10  |
| ENPP5  | rs141947687 | 20 | 45859438  | G | A | 0.64 | -0.04 | 0.01 | 5.41E-06  |
| ENPP7  | rs114165349 | 1  | 26695422  | C | G | 0.02 | 0.15  | 0.02 | 7.88E-07  |
| ENPP7  | rs199900492 | 1  | 234714673 | C | A | 0.52 | -0.05 | 0.01 | 5.59E-07  |
| ENPP7  | -           | 5  | 132416951 | G | A | 0.19 | 0.05  | 0.01 | 1.28E-05  |
| ENPP7  | -           | 6  | 24429112  | C | T | 0.00 | -0.38 | 0.04 | 3.55E-08  |
| ENPP7  | rs28601761  | 8  | 125487789 | G | C | 0.42 | -0.04 | 0.01 | 5.93E-06  |
| ENPP7  | rs762439986 | 10 | 63154758  | C | A | 0.47 | 0.07  | 0.01 | 7.98E-14  |
| ENPP7  | rs2255531   | 12 | 120977112 | A | G | 0.35 | 0.06  | 0.01 | 2.48E-09  |
| ENPP7  | rs112635299 | 14 | 94371805  | T | G | 0.02 | 0.14  | 0.02 | 1.12E-05  |
| ENPP7  | rs147233090 | 15 | 43735849  | T | C | 0.02 | 0.15  | 0.02 | 1.01E-06  |
| ENPP7  | rs11868696  | 17 | 79732608  | G | A | 0.37 | 0.94  | 0.01 | 0.00E+00  |
| ENTPD2 | -           | 9  | 133255468 | T | G | 0.06 | 0.15  | 0.02 | 2.62E-09  |
| ENTPD2 | -           | 9  | 137049085 | T | G | 0.02 | -1.49 | 0.03 | 4.09E-294 |
| ENTPD2 | rs56278466  | 10 | 17833858  | G | T | 0.66 | 0.05  | 0.01 | 1.20E-05  |
| ENTPD2 | rs5848      | 17 | 44352876  | T | C | 0.27 | 0.06  | 0.01 | 4.41E-07  |
| ENTPD5 | rs35457250  | 3  | 186620775 | T | C | 0.01 | 0.76  | 0.04 | 1.19E-39  |
| ENTPD5 | rs6054      | 4  | 154568456 | T | C | 0.01 | 0.33  | 0.05 | 8.49E-06  |
| ENTPD5 | rs28456     | 11 | 61822009  | G | A | 0.31 | 0.07  | 0.01 | 2.27E-08  |
| ENTPD5 | rs10843403  | 12 | 29387376  | C | T | 0.61 | 0.08  | 0.01 | 1.33E-11  |
| ENTPD5 | rs146086623 | 14 | 74000519  | A | G | 0.05 | -0.96 | 0.02 | 0.00E+00  |
| ENTPD5 | rs28929474  | 14 | 94378610  | T | C | 0.02 | 0.54  | 0.03 | 1.43E-41  |
| ENTPD5 | rs763665    | 16 | 72044144  | T | C | 0.16 | 0.08  | 0.01 | 1.60E-07  |
| ENTPD5 | rs8178824   | 17 | 66228657  | T | C | 0.03 | 0.41  | 0.02 | 4.66E-37  |
| ENTPD5 | rs7236989   | 18 | 59343221  | C | T | 0.63 | -0.05 | 0.01 | 1.75E-06  |
| ENTPD6 | rs61804164  | 1  | 161653235 | C | G | 0.12 | 0.07  | 0.01 | 4.19E-06  |
| ENTPD6 | rs12489828  | 3  | 52532998  | T | G | 0.53 | 0.05  | 0.01 | 7.69E-06  |
| ENTPD6 | rs505922    | 9  | 133273813 | C | T | 0.32 | 0.14  | 0.01 | 1.40E-38  |
| ENTPD6 | rs139196635 | 12 | 101863758 | A | G | 0.02 | 0.16  | 0.02 | 1.59E-05  |
| ENTPD6 | rs28929474  | 14 | 94378610  | T | C | 0.02 | 0.19  | 0.02 | 1.14E-07  |
| ENTPD6 | rs704       | 17 | 28367840  | A | G | 0.47 | -0.05 | 0.01 | 3.74E-07  |
| ENTPD6 | rs17695224  | 19 | 51820963  | A | G | 0.27 | -0.10 | 0.01 | 1.15E-17  |
| ENTPD6 | rs6050446   | 20 | 25214873  | G | A | 0.97 | 1.86  | 0.02 | 0.00E+00  |
| ENTPD6 | rs6061054   | 20 | 31223514  | G | T | 0.96 | 1.57  | 0.02 | 0.00E+00  |
| EPCAM  | rs1430780   | 2  | 67651196  | C | T | 0.68 | -0.05 | 0.01 | 1.40E-05  |
| EPCAM  | rs2241764   | 2  | 132417191 | T | C | 0.34 | -0.08 | 0.01 | 2.47E-12  |
| EPCAM  | rs35853577  | 2  | 232694169 | C | T | 0.43 | -0.07 | 0.01 | 5.19E-09  |
| EPCAM  | rs1713810   | 3  | 154159037 | G | A | 0.85 | -0.08 | 0.01 | 7.58E-08  |
| EPCAM  | rs939885    | 3  | 196228891 | A | G | 0.49 | 0.06  | 0.01 | 5.64E-07  |
| EPCAM  | rs9478784   | 6  | 150699194 | T | C | 0.10 | 0.12  | 0.01 | 3.82E-10  |
| EPCAM  | rs11142461  | 9  | 68444973  | C | T | 0.04 | -0.17 | 0.02 | 1.46E-08  |
| EPCAM  | -           | 9  | 133263362 | G | A | 0.18 | -0.15 | 0.01 | 6.19E-27  |
| EPCAM  | rs2291428   | 10 | 45463408  | C | G | 0.24 | -0.09 | 0.01 | 1.84E-12  |
| EPCAM  | rs56398830  | 13 | 103049340 | A | G | 0.01 | -0.82 | 0.03 | 1.24E-55  |
| EPCAM  | rs35193388  | 16 | 4370816   | C | G | 0.73 | -0.07 | 0.01 | 3.57E-08  |
| EPCAM  | rs12938714  | 17 | 30318092  | A | G | 0.33 | 0.16  | 0.01 | 2.58E-42  |
| EPCAM  | -           | 17 | 39383590  | C | T | 0.26 | 0.07  | 0.01 | 2.54E-07  |
| EPCAM  | rs2318997   | 18 | 57861998  | G | T | 0.43 | -0.05 | 0.01 | 6.51E-06  |
| EPCAM  | rs681343    | 19 | 48703205  | T | C | 0.51 | -0.23 | 0.01 | 9.30E-96  |
| EPCAM  | rs3746778   | 20 | 62710120  | A | G | 0.42 | 0.06  | 0.01 | 6.47E-07  |
| EPHA1  | rs1497406   | 1  | 16178825  | G | A | 0.58 | 0.06  | 0.01 | 9.18E-09  |
| EPHA1  | rs61747728  | 1  | 179557079 | T | C | 0.04 | 0.13  | 0.02 | 4.06E-06  |



|        |             |    |           |   |   |      |       |      |           |
|--------|-------------|----|-----------|---|---|------|-------|------|-----------|
| EPHA1  | rs75045569  | 7  | 143412115 | G | T | 0.18 | 0.25  | 0.01 | 1.82E-75  |
| EPHA1  | rs10740131  | 10 | 63511728  | T | A | 0.47 | 0.10  | 0.01 | 3.41E-20  |
| EPHA1  | rs28929474  | 14 | 94378610  | T | C | 0.02 | 0.29  | 0.02 | 6.07E-15  |
| EPHA1  | rs34882080  | 16 | 20350119  | G | A | 0.18 | -0.06 | 0.01 | 1.64E-05  |
| EPHA1  | rs3814995   | 19 | 35851310  | T | C | 0.31 | 0.06  | 0.01 | 3.88E-07  |
| EPHA2  | rs924204    | 1  | 16187431  | G | A | 0.59 | -0.13 | 0.01 | 1.85E-31  |
| EPHA2  | rs61747728  | 1  | 179557079 | T | C | 0.04 | 0.16  | 0.02 | 1.01E-07  |
| EPHA2  | rs11689257  | 2  | 162101843 | A | G | 0.07 | -0.11 | 0.01 | 2.68E-06  |
| EPHA2  | -           | 6  | 32643672  | G | T | 0.18 | 0.10  | 0.01 | 2.94E-10  |
| EPHA2  | rs8176746   | 9  | 133255935 | T | G | 0.06 | 0.14  | 0.01 | 1.05E-09  |
| EPHA2  | rs77924615  | 16 | 20381010  | A | G | 0.20 | -0.07 | 0.01 | 2.68E-06  |
| EPHA2  | rs679574    | 19 | 48702851  | G | C | 0.51 | -0.07 | 0.01 | 8.01E-10  |
| EPHB4  | rs61747728  | 1  | 179557079 | T | C | 0.04 | 0.15  | 0.02 | 8.46E-08  |
| EPHB4  | rs10179584  | 2  | 18497405  | C | T | 0.34 | 0.05  | 0.01 | 1.85E-05  |
| EPHB4  | rs314361    | 7  | 100815383 | G | A | 0.52 | 0.15  | 0.01 | 1.52E-43  |
| EPHB4  | rs507666    | 9  | 133273983 | A | G | 0.18 | -0.37 | 0.01 | 4.66E-146 |
| EPHB4  | rs7099071   | 10 | 28704967  | C | T | 0.17 | 0.06  | 0.01 | 2.61E-05  |
| EPHB4  | rs7909516   | 10 | 76125579  | T | C | 0.22 | -0.09 | 0.01 | 2.92E-12  |
| EPHB4  | rs9558661   | 13 | 105997744 | T | C | 0.20 | -0.13 | 0.01 | 1.06E-20  |
| EPHB4  | rs4997081   | 16 | 20353912  | C | G | 0.19 | -0.08 | 0.01 | 8.71E-09  |
| EPHB4  | rs186021206 | 17 | 7166093   | A | G | 0.01 | 0.39  | 0.05 | 4.49E-07  |
| EPHB4  | rs1137844   | 19 | 35852177  | G | C | 0.32 | 0.07  | 0.01 | 5.13E-08  |
| EPHB4  | -           | 19 | 49546384  | G | T | 0.25 | 0.06  | 0.01 | 1.48E-05  |
| EPHB6  | rs61747728  | 1  | 179557079 | T | C | 0.04 | 0.20  | 0.02 | 4.57E-12  |
| EPHB6  | rs7789303   | 7  | 142854785 | G | A | 0.27 | -0.32 | 0.01 | 8.85E-134 |
| EPHB6  | rs13329952  | 16 | 20355185  | C | T | 0.19 | -0.09 | 0.01 | 2.37E-09  |
| EPHB6  | rs1137844   | 19 | 35852177  | G | C | 0.32 | 0.06  | 0.01 | 5.25E-06  |
| EPHX2  | rs71553864  | 8  | 27536817  | C | A | 0.06 | 0.26  | 0.02 | 2.71E-25  |
| EPO    | rs218264    | 4  | 54542708  | T | A | 0.25 | 0.08  | 0.01 | 1.62E-08  |
| EPO    | rs2032444   | 6  | 26046516  | G | T | 0.35 | -0.08 | 0.01 | 3.76E-10  |
| EPO    | rs1546723   | 6  | 109304676 | A | G | 0.45 | 0.06  | 0.01 | 1.88E-07  |
| EPO    | rs7776054   | 6  | 135097778 | G | A | 0.26 | 0.21  | 0.01 | 1.93E-56  |
| EPO    | rs11976235  | 7  | 100722758 | T | C | 0.01 | 0.53  | 0.05 | 1.16E-12  |
| EPO    | rs78744187  | 19 | 33263642  | T | C | 0.08 | -0.12 | 0.01 | 3.61E-08  |
| EPO    | rs73036519  | 19 | 45245104  | C | G | 0.30 | 0.06  | 0.01 | 8.75E-06  |
| EPO    | rs4811073   | 20 | 50483272  | T | C | 0.54 | -0.05 | 0.01 | 8.88E-06  |
| EPO    | rs855791    | 22 | 37066896  | G | A | 0.56 | -0.08 | 0.01 | 2.11E-11  |
| EPS8L2 | rs9271657   | 6  | 32624805  | C | T | 0.21 | 0.06  | 0.01 | 6.29E-06  |
| EPS8L2 | rs1106192   | 9  | 93134304  | G | C | 0.05 | -0.11 | 0.02 | 2.28E-05  |
| EPS8L2 | rs11246276  | 11 | 706284    | T | G | 0.16 | -0.39 | 0.01 | 6.89E-149 |
| EPS8L2 | rs3747207   | 22 | 43928975  | A | G | 0.22 | 0.06  | 0.01 | 3.16E-06  |
| ERBB2  | -           | 3  | 136181921 | A | T | 0.70 | 0.07  | 0.01 | 3.27E-08  |
| ERBB2  | rs9270487   | 6  | 32591299  | G | A | 0.33 | -0.07 | 0.01 | 3.53E-08  |
| ERBB2  | rs1461729   | 8  | 9329732   | G | A | 0.90 | -0.09 | 0.01 | 2.09E-07  |
| ERBB2  | rs8176749   | 9  | 133255801 | T | C | 0.06 | 0.11  | 0.01 | 1.31E-06  |
| ERBB2  | -           | 10 | 63501416  | C | T | 0.47 | 0.07  | 0.01 | 1.57E-09  |
| ERBB2  | -           | 10 | 69509433  | A | T | 0.43 | 0.05  | 0.01 | 1.93E-05  |
| ERBB2  | rs11045856  | 12 | 21197755  | G | T | 0.24 | 0.07  | 0.01 | 1.79E-08  |
| ERBB2  | rs28929474  | 14 | 94378610  | T | C | 0.02 | 0.23  | 0.02 | 5.60E-10  |
| ERBB2  | rs4788460   | 16 | 72120610  | T | C | 0.29 | 0.05  | 0.01 | 1.58E-05  |
| ERBB2  | rs3764354   | 17 | 39760570  | T | C | 0.15 | 0.20  | 0.01 | 6.07E-39  |
| ERBB2  | rs1801689   | 17 | 66214462  | C | A | 0.03 | 0.31  | 0.02 | 2.16E-22  |
| ERBB2  | rs1800961   | 20 | 44413724  | T | C | 0.03 | -0.13 | 0.02 | 2.50E-05  |
| ERBB3  | rs1260326   | 2  | 27508073  | C | T | 0.61 | -0.13 | 0.01 | 3.32E-34  |
| ERBB3  | rs370542983 | 2  | 241333621 | A | T | 0.35 | -0.05 | 0.01 | 2.78E-05  |
| ERBB3  | rs13234131  | 7  | 73611645  | G | A | 0.13 | -0.08 | 0.01 | 3.27E-07  |

|       |             |    |           |   |   |      |       |      |           |
|-------|-------------|----|-----------|---|---|------|-------|------|-----------|
| ERBB3 | rs1077481   | 7  | 129102897 | T | C | 0.55 | -0.10 | 0.01 | 2.08E-21  |
| ERBB3 | rs28601761  | 8  | 125487789 | G | C | 0.42 | -0.06 | 0.01 | 4.01E-07  |
| ERBB3 | rs10822159  | 10 | 63336490  | T | C | 0.41 | -0.05 | 0.01 | 1.35E-05  |
| ERBB3 | rs75526830  | 12 | 56095610  | G | A | 0.00 | 2.48  | 0.05 | 8.06E-219 |
| ERBB3 | rs150844304 | 15 | 43434427  | C | A | 0.02 | 0.20  | 0.02 | 1.03E-08  |
| ERBB3 | rs149394327 | 17 | 66232877  | C | G | 0.03 | 0.19  | 0.02 | 2.92E-09  |
| ERBB4 | rs9787076   | 1  | 43675478  | C | A | 0.33 | 0.06  | 0.01 | 9.43E-08  |
| ERBB4 | rs35383942  | 1  | 201468704 | T | C | 0.06 | 0.13  | 0.01 | 7.77E-09  |
| ERBB4 | rs12692385  | 2  | 9554491   | T | C | 0.67 | 0.08  | 0.01 | 8.59E-13  |
| ERBB4 | rs4665972   | 2  | 27375230  | C | T | 0.61 | 0.06  | 0.01 | 2.86E-08  |
| ERBB4 | rs11453664  | 2  | 212538240 | C | A | 0.27 | 0.22  | 0.01 | 1.07E-67  |
| ERBB4 | rs140620086 | 3  | 98857467  | T | C | 0.05 | -0.12 | 0.02 | 2.16E-05  |
| ERBB4 | -           | 3  | 186932142 | C | G | 0.62 | 0.07  | 0.01 | 5.18E-10  |
| ERBB4 | rs11757137  | 6  | 32552380  | T | C | 0.44 | 0.06  | 0.01 | 3.00E-07  |
| ERBB4 | rs34673027  | 7  | 129098971 | A | C | 0.45 | -0.07 | 0.01 | 2.36E-11  |
| ERBB4 | rs2519093   | 9  | 133266456 | T | C | 0.18 | -0.14 | 0.01 | 1.08E-22  |
| ERBB4 | rs56278466  | 10 | 17833858  | G | T | 0.66 | 0.11  | 0.01 | 1.73E-20  |
| ERBB4 | rs11220465  | 11 | 126387884 | A | G | 0.15 | -0.07 | 0.01 | 1.70E-05  |
| ERBB4 | rs11830324  | 12 | 510452    | A | T | 0.17 | -0.08 | 0.01 | 4.37E-08  |
| ERBB4 | rs7324484   | 13 | 48073943  | A | G | 0.66 | 0.05  | 0.01 | 1.38E-05  |
| ERBB4 | rs2541593   | 16 | 53423     | A | C | 0.81 | 0.07  | 0.01 | 8.81E-07  |
| ERBB4 | -           | 16 | 72045090  | T | G | 0.18 | -0.08 | 0.01 | 2.31E-08  |
| ERBB4 | rs186021206 | 17 | 7166093   | A | G | 0.01 | 0.96  | 0.05 | 1.74E-38  |
| ERBB4 | rs72835417  | 17 | 49164280  | A | G | 0.11 | 0.15  | 0.01 | 1.70E-17  |
| ERBB4 | rs485073    | 19 | 48703998  | G | A | 0.54 | 0.10  | 0.01 | 6.21E-19  |
| ERBIN | rs17622656  | 5  | 132485305 | A | G | 0.39 | -0.05 | 0.01 | 2.60E-05  |
| ERBIN | rs342293    | 7  | 106731773 | G | C | 0.46 | -0.05 | 0.01 | 8.38E-06  |
| ERBIN | rs10822145  | 10 | 63174788  | T | C | 0.47 | 0.05  | 0.01 | 2.57E-06  |
| EREG  | rs78803121  | 4  | 74382788  | T | G | 0.06 | -0.19 | 0.02 | 4.51E-14  |
| EREG  | rs4572884   | 4  | 101862194 | T | C | 0.40 | -0.05 | 0.01 | 1.65E-05  |
| EREG  | rs12655145  | 5  | 151455788 | G | A | 0.62 | 0.07  | 0.01 | 9.22E-10  |
| EREG  | rs2516471   | 6  | 31432515  | A | G | 0.06 | -0.11 | 0.02 | 1.07E-05  |
| EREG  | rs6993770   | 8  | 105569300 | T | A | 0.29 | -0.09 | 0.01 | 2.05E-13  |
| EREG  | rs10820606  | 9  | 96430637  | C | A | 0.23 | -0.11 | 0.01 | 1.41E-14  |
| EREG  | rs7080386   | 10 | 63288546  | A | C | 0.41 | 0.07  | 0.01 | 6.01E-09  |
| EREG  | rs12445050  | 16 | 81837364  | T | C | 0.14 | 0.08  | 0.01 | 5.29E-06  |
| EREG  | rs892090    | 19 | 55027704  | G | T | 0.83 | 0.12  | 0.01 | 3.93E-14  |
| EREG  | rs6081569   | 20 | 19323142  | C | G | 0.37 | 0.05  | 0.01 | 9.79E-06  |
| ERP44 | rs764992666 | 1  | 230159329 | T | C | 0.60 | -0.05 | 0.01 | 3.22E-06  |
| ERP44 | rs1260326   | 2  | 27508073  | C | T | 0.61 | -0.06 | 0.01 | 1.03E-06  |
| ERP44 | rs7614709   | 3  | 186675997 | A | G | 0.22 | -0.25 | 0.01 | 1.15E-80  |
| ERP44 | rs6993770   | 8  | 105569300 | T | A | 0.29 | -0.06 | 0.01 | 8.98E-07  |
| ERP44 | rs188976415 | 9  | 100161776 | A | C | 0.00 | -0.58 | 0.06 | 5.84E-10  |
| ERP44 | rs36115375  | 10 | 7735836   | A | C | 0.06 | 0.72  | 0.02 | 6.05E-215 |
| ERP44 | rs17580     | 14 | 94380925  | A | T | 0.05 | -0.14 | 0.02 | 1.43E-07  |
| ESAM  | rs61747728  | 1  | 179557079 | T | C | 0.04 | 0.13  | 0.02 | 2.55E-05  |
| ESAM  | rs6961069   | 7  | 80589645  | T | C | 0.40 | 0.06  | 0.01 | 5.13E-07  |
| ESAM  | rs6993770   | 8  | 105569300 | T | A | 0.29 | -0.10 | 0.01 | 3.21E-17  |
| ESAM  | rs8176672   | 9  | 133266772 | T | C | 0.06 | 0.20  | 0.02 | 1.13E-18  |
| ESAM  | rs774510679 | 10 | 63304076  | A | C | 0.41 | 0.09  | 0.01 | 1.08E-14  |
| ESAM  | rs61753651  | 11 | 124756673 | A | G | 0.00 | -1.84 | 0.06 | 1.82E-96  |
| ESAM  | rs2127870   | 14 | 65330128  | C | G | 0.79 | 0.09  | 0.01 | 1.13E-09  |
| ESAM  | rs188942006 | 15 | 64711627  | C | G | 0.07 | 0.11  | 0.01 | 3.10E-06  |
| ESAM  | rs1654425   | 19 | 55027612  | C | T | 0.83 | 0.13  | 0.01 | 2.34E-18  |
| ESM1  | rs1260326   | 2  | 27508073  | C | T | 0.61 | 0.05  | 0.01 | 1.77E-05  |
| ESM1  | rs16822633  | 2  | 226782243 | G | A | 0.04 | -0.12 | 0.02 | 1.26E-05  |

|      |             |    |           |   |   |      |       |      |           |
|------|-------------|----|-----------|---|---|------|-------|------|-----------|
| ESM1 | rs557470468 | 3  | 52696168  | C | T | 0.01 | 0.45  | 0.05 | 4.05E-08  |
| ESM1 | rs4242051   | 5  | 54902947  | C | T | 0.75 | 0.19  | 0.01 | 5.80E-49  |
| ESM1 | rs3029083   | 5  | 72841120  | C | T | 0.53 | 0.05  | 0.01 | 1.90E-05  |
| ESM1 | rs10491244  | 5  | 82420208  | A | G | 0.21 | -0.09 | 0.01 | 7.39E-10  |
| ESM1 | rs4959186   | 6  | 2477529   | G | T | 0.52 | 0.05  | 0.01 | 1.86E-05  |
| ESM1 | rs113760175 | 6  | 22343363  | A | G | 0.07 | 0.14  | 0.01 | 3.80E-10  |
| ESM1 | rs9269891   | 6  | 32583240  | T | C | 0.46 | -0.06 | 0.01 | 4.56E-07  |
| ESM1 | rs1475718   | 9  | 134226324 | A | G | 0.44 | -0.08 | 0.01 | 8.63E-13  |
| ESM1 | rs2393969   | 10 | 63380680  | C | A | 0.47 | 0.06  | 0.01 | 4.49E-08  |
| ESM1 | rs76895963  | 12 | 4275678   | G | T | 0.02 | 0.19  | 0.03 | 2.09E-05  |
| ESM1 | rs7310615   | 12 | 111427245 | G | C | 0.52 | -0.07 | 0.01 | 2.32E-09  |
| EZR  | rs3734470   | 6  | 158766315 | T | A | 0.70 | 0.10  | 0.01 | 1.74E-14  |
| EZR  | rs7208422   | 17 | 78134494  | T | A | 0.48 | -0.06 | 0.01 | 1.64E-06  |
| EZR  | rs10405357  | 19 | 54255803  | C | T | 0.44 | -0.06 | 0.01 | 1.03E-07  |
| F11R | rs60315407  | 1  | 161063015 | C | T | 0.29 | 0.07  | 0.01 | 2.92E-07  |
| F11R | rs1354034   | 3  | 56815721  | C | T | 0.60 | 0.08  | 0.01 | 1.09E-10  |
| F11R | rs3804749   | 3  | 123114156 | T | C | 0.59 | -0.06 | 0.01 | 5.04E-06  |
| F11R | rs11242109  | 5  | 132341354 | T | G | 0.48 | -0.06 | 0.01 | 6.55E-08  |
| F11R | rs17154155  | 7  | 80604927  | T | G | 0.41 | 0.05  | 0.01 | 2.61E-05  |
| F11R | rs342293    | 7  | 106731773 | G | C | 0.46 | -0.05 | 0.01 | 2.61E-05  |
| F11R | rs6993770   | 8  | 105569300 | T | A | 0.29 | -0.07 | 0.01 | 1.40E-07  |
| F11R | rs409801    | 9  | 4744743   | C | T | 0.51 | 0.05  | 0.01 | 1.02E-05  |
| F11R | rs10733789  | 10 | 63188924  | C | T | 0.31 | 0.06  | 0.01 | 4.13E-06  |
| F11R | rs4608137   | 12 | 6184207   | A | G | 0.49 | -0.06 | 0.01 | 2.49E-08  |
| F11R | rs60822569  | 12 | 54323724  | C | T | 0.55 | 0.05  | 0.01 | 6.38E-06  |
| F11R | rs1654425   | 19 | 55027612  | C | T | 0.83 | 0.08  | 0.01 | 1.27E-07  |
| F2R  | rs17200557  | 3  | 16936390  | T | G | 0.03 | 0.16  | 0.02 | 1.36E-06  |
| F2R  | rs1354034   | 3  | 56815721  | C | T | 0.60 | 0.09  | 0.01 | 9.13E-15  |
| F2R  | rs168753    | 5  | 76732299  | T | A | 0.17 | -0.15 | 0.01 | 2.25E-24  |
| F2R  | rs778641135 | 6  | 135097494 | T | C | 0.26 | 0.06  | 0.01 | 9.88E-06  |
| F2R  | rs6993770   | 8  | 105569300 | T | A | 0.29 | -0.08 | 0.01 | 1.64E-10  |
| F2R  | rs579459    | 9  | 133278724 | C | T | 0.21 | -0.07 | 0.01 | 5.07E-06  |
| F2R  | rs7080386   | 10 | 63288546  | A | C | 0.41 | 0.11  | 0.01 | 3.75E-22  |
| F2R  | rs73396521  | 11 | 267568    | A | G | 0.25 | 0.06  | 0.01 | 6.84E-06  |
| F2R  | rs892090    | 19 | 55027704  | G | T | 0.83 | 0.08  | 0.01 | 2.10E-07  |
| F3   | rs6666213   | 1  | 94808809  | G | A | 0.37 | 0.18  | 0.01 | 2.85E-65  |
| F3   | rs780094    | 2  | 27518370  | C | T | 0.62 | 0.05  | 0.01 | 2.32E-06  |
| F3   | rs4458205   | 2  | 232692936 | T | C | 0.36 | -0.05 | 0.01 | 2.06E-05  |
| F3   | rs2519093   | 9  | 133266456 | T | C | 0.18 | -0.27 | 0.01 | 2.52E-93  |
| F3   | rs199881213 | 13 | 103048390 | A | C | 0.07 | -0.11 | 0.01 | 1.76E-07  |
| F3   | rs488703    | 13 | 113116562 | A | G | 0.10 | 0.10  | 0.01 | 4.43E-09  |
| F3   | rs77924615  | 16 | 20381010  | A | G | 0.20 | -0.06 | 0.01 | 1.90E-05  |
| F3   | rs200489612 | 17 | 7203059   | A | G | 0.01 | 0.47  | 0.05 | 1.58E-09  |
| F3   | rs35218105  | 17 | 30317759  | A | C | 0.32 | 0.08  | 0.01 | 2.83E-13  |
| F3   | rs2659005   | 17 | 81244914  | T | C | 0.44 | 0.05  | 0.01 | 1.53E-05  |
| F3   | rs516246    | 19 | 48702915  | T | C | 0.51 | -0.28 | 0.01 | 4.98E-160 |
| F7   | rs1260326   | 2  | 27508073  | C | T | 0.61 | -0.12 | 0.01 | 8.75E-31  |
| F7   | rs1154401   | 4  | 99088587  | C | G | 0.66 | 0.05  | 0.01 | 2.62E-06  |
| F7   | -           | 6  | 32489866  | C | T | 0.64 | 0.05  | 0.01 | 2.59E-05  |
| F7   | rs35732917  | 7  | 73598939  | C | T | 0.28 | -0.06 | 0.01 | 4.39E-08  |
| F7   | rs7075901   | 10 | 63521234  | A | C | 0.47 | -0.06 | 0.01 | 7.67E-08  |
| F7   | rs7232      | 11 | 60173126  | A | T | 0.37 | 0.06  | 0.01 | 3.22E-07  |
| F7   | rs510335    | 13 | 113105441 | T | G | 0.11 | -0.77 | 0.01 | 0.00E+00  |
| F7   | rs28929474  | 14 | 94378610  | T | C | 0.02 | 0.16  | 0.02 | 2.24E-05  |
| F7   | rs540574262 | 20 | 35175899  | T | G | 0.09 | 0.22  | 0.01 | 4.36E-31  |
| F9   | rs1260326   | 2  | 27508073  | C | T | 0.61 | -0.11 | 0.01 | 3.48E-20  |

|       |             |    |           |   |   |      |       |      |           |
|-------|-------------|----|-----------|---|---|------|-------|------|-----------|
| F9    | rs13226650  | 7  | 73602675  | G | A | 0.20 | -0.07 | 0.01 | 2.40E-07  |
| FABP1 | rs2241883   | 2  | 88124547  | C | T | 0.31 | -0.23 | 0.01 | 1.97E-84  |
| FABP1 | rs17655730  | 11 | 270715    | C | T | 0.25 | 0.06  | 0.01 | 2.38E-05  |
| FABP2 | rs1375131   | 2  | 135197227 | C | T | 0.27 | 0.06  | 0.01 | 1.14E-05  |
| FABP2 | rs17009129  | 4  | 119359462 | T | C | 0.33 | -0.21 | 0.01 | 9.36E-71  |
| FABP2 | rs6472539   | 8  | 70717575  | C | G | 0.52 | -0.07 | 0.01 | 2.52E-10  |
| FABP2 | rs17655730  | 11 | 270715    | C | T | 0.25 | 0.08  | 0.01 | 3.65E-10  |
| FABP2 | rs8111874   | 19 | 48665685  | A | G | 0.46 | -0.06 | 0.01 | 1.85E-06  |
| FABP4 | rs7647481   | 3  | 12350314  | A | G | 0.12 | 0.10  | 0.01 | 2.38E-10  |
| FABP4 | rs112313579 | 8  | 81478948  | G | T | 0.16 | -0.12 | 0.01 | 3.41E-16  |
| FABP5 | rs118019635 | 8  | 81281047  | A | C | 0.07 | -0.20 | 0.01 | 2.71E-20  |
| FABP5 | rs6993770   | 8  | 105569300 | T | A | 0.29 | -0.06 | 0.01 | 1.51E-05  |
| FABP6 | rs1130435   | 5  | 160232266 | T | C | 0.40 | -0.13 | 0.01 | 2.46E-28  |
| FABP6 | rs5875434   | 6  | 33061456  | T | C | 0.55 | -0.15 | 0.01 | 7.33E-40  |
| FABP6 | rs6472539   | 8  | 70717575  | C | G | 0.51 | -0.21 | 0.01 | 1.96E-75  |
| FABP6 | rs35866622  | 19 | 48714803  | T | C | 0.50 | -0.08 | 0.01 | 6.74E-11  |
| FABP9 | rs80293268  | 1  | 8147519   | C | G | 0.05 | -0.12 | 0.02 | 1.59E-05  |
| FABP9 | rs72646785  | 1  | 17276977  | T | G | 0.17 | 0.16  | 0.01 | 1.55E-26  |
| FABP9 | rs36010924  | 1  | 152116368 | G | A | 0.18 | 0.37  | 0.01 | 1.43E-153 |
| FABP9 | rs774004    | 3  | 138458290 | A | G | 0.74 | 0.08  | 0.01 | 1.93E-10  |
| FABP9 | rs1344815   | 3  | 149623026 | G | A | 0.65 | -0.05 | 0.01 | 1.36E-05  |
| FABP9 | rs1345417   | 3  | 181794163 | G | C | 0.60 | 0.07  | 0.01 | 1.64E-10  |
| FABP9 | rs57866025  | 3  | 190239580 | T | C | 0.27 | 0.06  | 0.01 | 4.07E-06  |
| FABP9 | rs2436396   | 5  | 140153978 | G | A | 0.70 | -0.06 | 0.01 | 1.59E-07  |
| FABP9 | rs9263750   | 6  | 31146878  | C | T | 0.17 | 0.06  | 0.01 | 2.49E-05  |
| FABP9 | rs28497692  | 8  | 81500456  | T | G | 0.04 | -0.23 | 0.02 | 6.34E-16  |
| FABP9 | rs541551288 | 8  | 116301979 | A | G | 0.20 | -0.09 | 0.01 | 6.55E-12  |
| FABP9 | rs7905367   | 10 | 52574893  | C | G | 0.80 | 0.08  | 0.01 | 1.16E-09  |
| FABP9 | rs3809185   | 12 | 52553543  | A | G | 0.06 | -0.20 | 0.01 | 2.21E-19  |
| FABP9 | rs12367299  | 12 | 90734068  | A | G | 0.27 | 0.06  | 0.01 | 1.31E-06  |
| FABP9 | rs150743616 | 17 | 3524287   | T | C | 0.00 | 0.87  | 0.09 | 2.26E-09  |
| FABP9 | rs3894193   | 17 | 39969093  | G | C | 0.47 | -0.31 | 0.01 | 6.65E-176 |
| FABP9 | rs12457893  | 18 | 63258928  | C | A | 0.46 | -0.07 | 0.01 | 6.90E-10  |
| FABP9 | rs867348    | 19 | 39196481  | T | A | 0.68 | -0.09 | 0.01 | 7.41E-15  |
| FADD  | rs342298    | 7  | 106733200 | T | C | 0.46 | -0.05 | 0.01 | 2.03E-05  |
| FADD  | rs4746204   | 10 | 63568758  | T | C | 0.48 | -0.05 | 0.01 | 6.59E-06  |
| FADD  | rs10898847  | 11 | 70199816  | A | G | 0.41 | 0.08  | 0.01 | 1.06E-11  |
| FADD  | rs60822569  | 12 | 54323724  | C | T | 0.55 | 0.06  | 0.01 | 7.16E-08  |
| FAM3B | rs3129777   | 6  | 32678407  | A | C | 0.21 | -0.11 | 0.01 | 3.21E-16  |
| FAM3B | rs2519093   | 9  | 133266456 | T | C | 0.18 | -0.11 | 0.01 | 6.19E-15  |
| FAM3B | rs2559850   | 12 | 101699681 | A | G | 0.59 | 0.06  | 0.01 | 2.01E-07  |
| FAM3B | rs548921462 | 12 | 120958694 | T | C | 0.54 | -0.05 | 0.01 | 5.11E-06  |
| FAM3B | rs17743980  | 17 | 9890522   | A | G | 0.31 | 0.06  | 0.01 | 2.89E-07  |
| FAM3B | rs708686    | 19 | 5840608   | T | C | 0.27 | 0.25  | 0.01 | 1.25E-98  |
| FAM3B | rs602662    | 19 | 48703728  | A | G | 0.54 | 0.25  | 0.01 | 4.83E-120 |
| FAM3B | rs57529409  | 21 | 41346335  | T | C | 0.05 | -1.15 | 0.02 | 0.00E+00  |
| FAM3C | rs36198735  | 7  | 121440138 | C | A | 0.73 | -0.11 | 0.01 | 5.88E-19  |
| FAM3C | rs36060036  | 16 | 20350628  | T | C | 0.17 | -0.08 | 0.01 | 1.33E-07  |
| FAM3C | rs151204724 | 17 | 76649472  | G | T | 0.35 | 0.06  | 0.01 | 1.33E-07  |
| FAP   | rs1751479   | 1  | 65550522  | A | G | 0.65 | -0.06 | 0.01 | 4.45E-08  |
| FAP   | rs4664454   | 2  | 162214651 | G | C | 0.01 | 1.07  | 0.04 | 1.20E-83  |
| FAP   | rs9266252   | 6  | 31358045  | A | G | 0.70 | 0.12  | 0.01 | 6.38E-22  |
| FAP   | rs74044565  | 11 | 326384    | C | G | 0.14 | 0.08  | 0.01 | 3.18E-07  |
| FAP   | rs12908546  | 15 | 50702935  | C | A | 0.12 | 0.16  | 0.01 | 4.85E-20  |
| FAP   | rs740516    | 17 | 69086821  | G | C | 0.15 | -0.15 | 0.01 | 5.57E-21  |
| FAP   | rs7256564   | 19 | 33398687  | G | A | 0.69 | -0.05 | 0.01 | 1.63E-05  |

|       |             |    |           |   |   |      |       |      |           |
|-------|-------------|----|-----------|---|---|------|-------|------|-----------|
| FAS   | rs113705304 | 6  | 32622676  | G | C | 0.09 | 0.15  | 0.01 | 1.24E-16  |
| FAS   | rs10887882  | 10 | 89023165  | A | T | 0.58 | -0.25 | 0.01 | 4.16E-126 |
| FAS   | rs123698    | 19 | 807442    | C | G | 0.60 | 0.05  | 0.01 | 7.17E-06  |
| FAS   | rs738409    | 22 | 43928847  | G | C | 0.22 | 0.06  | 0.01 | 1.83E-06  |
| FASLG | rs79419452  | 1  | 172703333 | A | T | 0.16 | -0.10 | 0.01 | 2.12E-12  |
| FASLG | rs11127048  | 2  | 27529596  | A | G | 0.62 | -0.05 | 0.01 | 2.76E-06  |
| FASLG | rs11895938  | 2  | 68391950  | G | A | 0.71 | -0.05 | 0.01 | 1.95E-05  |
| FASLG | rs13063578  | 3  | 47046347  | A | T | 0.40 | -0.17 | 0.01 | 1.59E-59  |
| FASLG | rs13111860  | 4  | 141691726 | G | A | 0.71 | -0.05 | 0.01 | 2.85E-06  |
| FASLG | rs9259888   | 6  | 29930604  | C | T | 0.65 | -0.08 | 0.01 | 1.75E-09  |
| FASLG | rs117343599 | 8  | 38998228  | C | G | 0.02 | -0.18 | 0.02 | 9.07E-07  |
| FASLG | rs3927680   | 9  | 16887368  | A | T | 0.62 | 0.05  | 0.01 | 7.04E-07  |
| FASLG | rs8177655   | 10 | 5973156   | A | G | 0.33 | 0.08  | 0.01 | 1.12E-11  |
| FASLG | rs2646421   | 10 | 8425192   | C | G | 0.38 | 0.05  | 0.01 | 2.55E-06  |
| FASLG | rs978522    | 10 | 88988581  | C | T | 0.40 | 0.29  | 0.01 | 5.27E-164 |
| FASLG | rs745932882 | 10 | 92682235  | A | G | 0.46 | 0.11  | 0.01 | 1.01E-23  |
| FASLG | rs648710    | 11 | 126306481 | T | A | 0.74 | -0.11 | 0.01 | 8.32E-21  |
| FASLG | rs11053802  | 12 | 10444608  | T | C | 0.69 | -0.07 | 0.01 | 1.30E-09  |
| FASLG | rs3184504   | 12 | 111446804 | C | T | 0.52 | -0.16 | 0.01 | 1.16E-57  |
| FASLG | rs748988    | 14 | 99319904  | G | A | 0.61 | 0.06  | 0.01 | 3.25E-09  |
| FASLG | rs186021206 | 17 | 7166093   | A | G | 0.01 | 0.62  | 0.05 | 1.40E-18  |
| FASLG | rs9916257   | 17 | 35470352  | T | G | 0.44 | -0.12 | 0.01 | 2.04E-31  |
| FASLG | rs150597688 | 17 | 39914833  | T | C | 0.50 | 0.05  | 0.01 | 3.04E-07  |
| FASLG | rs2659005   | 17 | 81244914  | T | C | 0.44 | 0.06  | 0.01 | 9.45E-08  |
| FASLG | rs1205340   | 20 | 34336065  | A | G | 0.50 | 0.07  | 0.01 | 1.73E-11  |
| FASLG | rs35477491  | 21 | 13901496  | T | C | 0.22 | -0.09 | 0.01 | 8.38E-10  |
| FASLG | rs738722    | 22 | 28734024  | C | T | 0.70 | 0.05  | 0.01 | 3.45E-06  |
| FASLG | rs739141    | 22 | 39428445  | T | C | 0.66 | -0.06 | 0.01 | 3.27E-08  |
| FBP1  | rs499206    | 9  | 94597197  | G | A | 0.93 | 0.57  | 0.01 | 1.56E-158 |
| FBP1  | rs10883451  | 10 | 100164661 | C | T | 0.50 | -0.06 | 0.01 | 3.70E-07  |
| FBP1  | rs145920606 | 12 | 7474715   | G | A | 0.08 | 0.09  | 0.01 | 5.38E-06  |
| FBP1  | rs10405357  | 19 | 54255803  | C | T | 0.44 | -0.07 | 0.01 | 7.96E-11  |
| FBP1  | rs738409    | 22 | 43928847  | G | C | 0.22 | 0.07  | 0.01 | 1.41E-07  |
| FCAR  | rs188468174 | 1  | 24965206  | T | C | 0.01 | -0.57 | 0.03 | 3.22E-45  |
| FCAR  | rs2070901   | 1  | 161215268 | T | G | 0.27 | 0.05  | 0.01 | 1.74E-06  |
| FCAR  | rs9862795   | 3  | 49878073  | T | A | 0.53 | 0.04  | 0.01 | 3.69E-06  |
| FCAR  | rs4012248   | 3  | 187061819 | A | G | 0.07 | 0.09  | 0.01 | 8.93E-06  |
| FCAR  | rs2853950   | 6  | 31268398  | T | C | 0.44 | 0.06  | 0.01 | 1.67E-09  |
| FCAR  | rs11155297  | 6  | 143503967 | T | G | 0.26 | -0.05 | 0.01 | 1.20E-05  |
| FCAR  | rs6796      | 7  | 6462736   | C | T | 0.28 | 0.09  | 0.01 | 1.82E-18  |
| FCAR  | rs174575    | 11 | 61834531  | G | C | 0.28 | 0.05  | 0.01 | 2.73E-05  |
| FCAR  | rs73017385  | 11 | 126309680 | A | G | 0.24 | 0.09  | 0.01 | 1.25E-16  |
| FCAR  | rs3184504   | 12 | 111446804 | C | T | 0.52 | -0.08 | 0.01 | 3.52E-18  |
| FCAR  | rs186021206 | 17 | 7166093   | A | G | 0.01 | 0.65  | 0.04 | 6.91E-24  |
| FCAR  | rs3826331   | 17 | 39994239  | C | T | 0.60 | -0.08 | 0.01 | 1.88E-17  |
| FCAR  | rs1292061   | 17 | 59833869  | G | A | 0.56 | 0.04  | 0.01 | 9.60E-06  |
| FCAR  | rs12608573  | 19 | 54879918  | G | C | 0.22 | 0.84  | 0.01 | 0.00E+00  |
| FCER2 | rs1432296   | 2  | 60841032  | T | C | 0.14 | 0.07  | 0.01 | 1.57E-05  |
| FCER2 | rs17056278  | 5  | 158825430 | G | C | 0.08 | -0.15 | 0.01 | 1.51E-13  |
| FCER2 | rs2844606   | 6  | 31280655  | G | A | 0.42 | -0.09 | 0.01 | 5.00E-15  |
| FCER2 | rs658228    | 6  | 44627518  | T | C | 0.66 | 0.05  | 0.01 | 1.48E-05  |
| FCER2 | rs9488914   | 6  | 116369686 | T | C | 0.36 | 0.09  | 0.01 | 1.37E-16  |
| FCER2 | rs59082587  | 7  | 7837715   | T | G | 0.18 | -0.06 | 0.01 | 1.10E-05  |
| FCER2 | rs2278467   | 8  | 24331331  | C | T | 0.16 | -0.08 | 0.01 | 7.68E-07  |
| FCER2 | rs562240450 | 8  | 129592026 | A | C | 0.32 | -0.06 | 0.01 | 1.95E-06  |
| FCER2 | -           | 10 | 61976858  | C | T | 0.65 | -0.05 | 0.01 | 8.23E-06  |

|        |             |    |           |   |   |      |       |      |           |
|--------|-------------|----|-----------|---|---|------|-------|------|-----------|
| FCER2  | rs12784975  | 10 | 96620380  | C | T | 0.19 | -0.08 | 0.01 | 6.96E-09  |
| FCER2  | rs111338191 | 12 | 111388673 | T | A | 0.52 | -0.05 | 0.01 | 3.47E-06  |
| FCER2  | rs374039502 | 13 | 108308037 | A | T | 0.02 | 0.20  | 0.03 | 1.96E-06  |
| FCER2  | rs9939427   | 16 | 85982485  | A | G | 0.23 | 0.07  | 0.01 | 1.05E-07  |
| FCER2  | rs34557412  | 17 | 16948873  | G | A | 0.01 | 0.30  | 0.04 | 8.33E-06  |
| FCER2  | rs35222145  | 17 | 39851068  | G | T | 0.49 | -0.09 | 0.01 | 1.00E-16  |
| FCER2  | rs2277989   | 19 | 7696926   | G | A | 0.49 | -0.29 | 0.01 | 1.13E-149 |
| FCER2  | -           | 20 | 46107732  | T | A | 0.75 | -0.09 | 0.01 | 5.99E-12  |
| FCER2  | rs75743846  | 22 | 41929013  | A | G | 0.02 | -0.19 | 0.03 | 9.29E-06  |
| FCGR2A | rs11810143  | 1  | 161510859 | G | A | 0.12 | -1.46 | 0.01 | 0.00E+00  |
| FCGR2A | rs62165726  | 2  | 134208991 | A | C | 0.04 | -0.11 | 0.02 | 2.75E-06  |
| FCGR2A | rs199922514 | 8  | 9325592   | G | A | 0.91 | -0.07 | 0.01 | 2.00E-05  |
| FCGR2A | rs782819119 | 9  | 133270584 | A | T | 0.31 | 0.05  | 0.01 | 1.25E-06  |
| FCGR2A | rs75071241  | 11 | 126362291 | A | G | 0.06 | -0.09 | 0.01 | 4.88E-06  |
| FCGR2A | rs7137828   | 12 | 111494996 | T | C | 0.52 | -0.06 | 0.01 | 2.36E-10  |
| FCGR2A | rs186021206 | 17 | 7166093   | A | G | 0.01 | 1.08  | 0.04 | 1.26E-72  |
| FCGR2B | rs1801274   | 1  | 161509955 | G | A | 0.53 | -0.45 | 0.01 | 0.00E+00  |
| FCGR2B | rs4240356   | 4  | 144121097 | G | C | 0.55 | -0.05 | 0.01 | 1.47E-05  |
| FCGR2B | rs505922    | 9  | 133273813 | C | T | 0.32 | -0.18 | 0.01 | 4.05E-51  |
| FCGR2B | rs6115999   | 20 | 3719094   | T | C | 0.01 | 0.31  | 0.03 | 4.93E-09  |
| FCGR3B | -           | 1  | 156323264 | C | T | 0.50 | 0.08  | 0.01 | 2.84E-12  |
| FCGR3B | rs200688856 | 1  | 161629989 | C | G | 0.34 | -0.86 | 0.01 | 0.00E+00  |
| FCGR3B | rs34860591  | 3  | 98888620  | C | T | 0.08 | 0.09  | 0.01 | 7.31E-07  |
| FCGR3B | rs9274505   | 6  | 32666349  | A | G | 0.22 | -0.06 | 0.01 | 3.85E-06  |
| FCGR3B | rs6796      | 7  | 6462736   | C | T | 0.28 | 0.06  | 0.01 | 2.51E-08  |
| FCGR3B | rs7804185   | 7  | 50313548  | C | T | 0.40 | -0.05 | 0.01 | 7.91E-08  |
| FCGR3B | rs73017399  | 11 | 126316417 | C | G | 0.24 | 0.20  | 0.01 | 4.66E-66  |
| FCGR3B | rs3184504   | 12 | 111446804 | C | T | 0.52 | -0.07 | 0.01 | 8.87E-14  |
| FCGR3B | rs10138570  | 14 | 65393320  | G | A | 0.53 | -0.07 | 0.01 | 1.17E-12  |
| FCGR3B | rs10873558  | 14 | 105658834 | G | C | 0.49 | -0.07 | 0.01 | 8.79E-10  |
| FCGR3B | rs36082322  | 15 | 101209436 | C | T | 0.11 | 0.07  | 0.01 | 9.57E-06  |
| FCGR3B | rs186021206 | 17 | 7166093   | A | G | 0.01 | 0.62  | 0.04 | 3.42E-20  |
| FCGR3B | rs2241244   | 17 | 39997301  | C | G | 0.54 | -0.08 | 0.01 | 5.27E-18  |
| FCGR3B | rs4760      | 19 | 43648948  | G | A | 0.16 | -0.27 | 0.01 | 3.27E-93  |
| FCN2   | rs72550870  | 1  | 11046609  | C | T | 0.03 | -0.21 | 0.02 | 3.33E-14  |
| FCN2   | rs35677470  | 3  | 58197909  | A | G | 0.08 | 0.12  | 0.01 | 1.99E-12  |
| FCN2   | rs12496730  | 3  | 98688089  | C | G | 0.44 | -0.04 | 0.01 | 9.45E-06  |
| FCN2   | rs11386832  | 5  | 96785666  | A | T | 0.74 | 0.14  | 0.01 | 8.47E-38  |
| FCN2   | rs111331197 | 6  | 7883235   | T | C | 0.01 | 0.27  | 0.03 | 7.02E-09  |
| FCN2   | rs2516501   | 6  | 31388821  | T | C | 0.26 | 0.05  | 0.01 | 8.45E-06  |
| FCN2   | rs7041446   | 9  | 134884208 | A | G | 0.46 | -0.62 | 0.01 | 0.00E+00  |
| FCN2   | rs174533    | 11 | 61781553  | A | G | 0.35 | 0.05  | 0.01 | 9.82E-06  |
| FCN2   | rs1850521   | 11 | 114570873 | T | G | 0.13 | -0.47 | 0.01 | 2.15E-238 |
| FCN2   | rs215225    | 12 | 481379    | G | A | 0.43 | -0.04 | 0.01 | 1.48E-05  |
| FCN2   | rs7484541   | 12 | 57321020  | T | A | 0.23 | -0.05 | 0.01 | 8.85E-06  |
| FCRL1  | rs4971154   | 1  | 157802090 | T | C | 0.50 | -0.36 | 0.01 | 4.91E-230 |
| FCRL1  | rs2009581   | 2  | 111050100 | A | G | 0.27 | -0.05 | 0.01 | 1.25E-05  |
| FCRL1  | rs34762068  | 3  | 128606920 | A | G | 0.27 | 0.05  | 0.01 | 1.60E-05  |
| FCRL1  | rs5001409   | 3  | 187017902 | C | A | 0.39 | -0.06 | 0.01 | 8.19E-09  |
| FCRL1  | rs10002742  | 4  | 140099011 | A | G | 0.44 | -0.05 | 0.01 | 2.64E-05  |
| FCRL1  | rs17361097  | 4  | 152080067 | A | G | 0.44 | 0.05  | 0.01 | 1.08E-06  |
| FCRL1  | -           | 5  | 88820075  | T | A | 0.31 | 0.07  | 0.01 | 3.92E-08  |
| FCRL1  | rs180798958 | 5  | 143809411 | A | G | 0.02 | -0.19 | 0.03 | 9.07E-06  |
| FCRL1  | rs112824187 | 5  | 158838300 | A | G | 0.08 | -0.16 | 0.01 | 2.75E-15  |
| FCRL1  | rs1226013   | 6  | 10539056  | G | T | 0.55 | 0.09  | 0.01 | 2.94E-18  |
| FCRL1  | rs2524072   | 6  | 31299079  | T | C | 0.52 | -0.07 | 0.01 | 4.49E-09  |

|       |             |    |           |   |   |      |       |      |           |
|-------|-------------|----|-----------|---|---|------|-------|------|-----------|
| FCRL1 | rs658228    | 6  | 44627518  | T | C | 0.66 | 0.05  | 0.01 | 2.16E-05  |
| FCRL1 | rs73348121  | 7  | 50344289  | C | T | 0.02 | -0.20 | 0.03 | 1.15E-05  |
| FCRL1 | rs1433577   | 8  | 129583635 | A | G | 0.27 | -0.08 | 0.01 | 2.95E-11  |
| FCRL1 | -           | 9  | 133263362 | G | A | 0.18 | 0.06  | 0.01 | 1.24E-05  |
| FCRL1 | rs4245597   | 10 | 61966183  | A | G | 0.65 | -0.11 | 0.01 | 3.38E-22  |
| FCRL1 | rs12784975  | 10 | 96620380  | C | T | 0.19 | -0.07 | 0.01 | 8.13E-08  |
| FCRL1 | rs1035606   | 12 | 29356517  | T | C | 0.28 | 0.05  | 0.01 | 8.13E-06  |
| FCRL1 | rs76428106  | 13 | 28029870  | C | T | 0.01 | 0.29  | 0.03 | 5.08E-09  |
| FCRL1 | rs374039502 | 13 | 108308037 | A | T | 0.02 | 0.30  | 0.03 | 6.96E-14  |
| FCRL1 | rs9927316   | 16 | 85982795  | G | C | 0.24 | 0.09  | 0.01 | 1.04E-12  |
| FCRL1 | rs186021206 | 17 | 7166093   | A | G | 0.01 | 0.71  | 0.05 | 7.65E-22  |
| FCRL1 | rs34557412  | 17 | 16948873  | G | A | 0.01 | 0.67  | 0.04 | 1.88E-24  |
| FCRL1 | rs35222145  | 17 | 39851068  | G | T | 0.49 | -0.08 | 0.01 | 1.19E-14  |
| FCRL1 | rs77542162  | 17 | 69085137  | G | A | 0.02 | 0.18  | 0.02 | 1.32E-06  |
| FCRL1 | rs73926277  | 19 | 33251720  | T | C | 0.34 | 0.07  | 0.01 | 2.74E-09  |
| FCRL1 | rs2297197   | 20 | 46044907  | G | C | 0.29 | 0.05  | 0.01 | 9.06E-06  |
| FCRL1 | rs73165110  | 22 | 41895852  | A | G | 0.08 | -0.12 | 0.01 | 1.71E-09  |
| FCRL2 | rs188468174 | 1  | 24965206  | T | C | 0.01 | -0.30 | 0.03 | 5.58E-10  |
| FCRL2 | rs12568320  | 1  | 157774214 | G | A | 0.17 | 0.76  | 0.01 | 0.00E+00  |
| FCRL2 | rs72832854  | 2  | 110833193 | G | T | 0.02 | -0.14 | 0.02 | 1.57E-05  |
| FCRL2 | rs61696487  | 3  | 169943075 | A | C | 0.16 | -0.07 | 0.01 | 7.40E-07  |
| FCRL2 | rs5001409   | 3  | 187017902 | C | A | 0.39 | -0.07 | 0.01 | 1.72E-12  |
| FCRL2 | rs9295574   | 6  | 10531011  | A | G | 0.43 | 0.07  | 0.01 | 5.91E-11  |
| FCRL2 | rs114619738 | 6  | 29916867  | C | T | 0.01 | 1.10  | 0.03 | 2.17E-103 |
| FCRL2 | rs12213174  | 6  | 170273051 | A | T | 0.17 | -0.06 | 0.01 | 1.25E-05  |
| FCRL2 | rs778224678 | 7  | 151256873 | G | T | 0.11 | 0.10  | 0.01 | 8.04E-10  |
| FCRL2 | rs12554596  | 9  | 37002145  | G | A | 0.20 | -0.07 | 0.01 | 3.03E-09  |
| FCRL2 | rs10791824  | 11 | 65791795  | G | A | 0.57 | 0.06  | 0.01 | 3.36E-09  |
| FCRL2 | rs4766578   | 12 | 111466567 | A | T | 0.50 | -0.05 | 0.01 | 1.80E-07  |
| FCRL2 | rs374039502 | 13 | 108308037 | A | T | 0.02 | 0.40  | 0.02 | 5.93E-28  |
| FCRL2 | rs186021206 | 17 | 7166093   | A | G | 0.01 | 0.61  | 0.04 | 8.13E-19  |
| FCRL2 | rs34557412  | 17 | 16948873  | G | A | 0.01 | 0.83  | 0.04 | 1.08E-42  |
| FCRL2 | rs79928920  | 17 | 46261601  | C | T | 0.23 | -0.06 | 0.01 | 4.62E-06  |
| FCRL2 | rs112001035 | 17 | 68827664  | A | G | 0.06 | 0.41  | 0.01 | 1.18E-84  |
| FCRL2 | rs11085015  | 19 | 3369574   | G | T | 0.80 | 0.09  | 0.01 | 4.17E-13  |
| FCRL2 | rs73165110  | 22 | 41895852  | A | G | 0.08 | -0.11 | 0.01 | 1.11E-08  |
| FCRL3 | rs7522061   | 1  | 157698600 | C | T | 0.48 | 0.96  | 0.01 | 0.00E+00  |
| FCRL3 | rs2009581   | 2  | 111050100 | A | G | 0.27 | -0.04 | 0.01 | 1.32E-05  |
| FCRL3 | rs7137828   | 12 | 111494996 | T | C | 0.52 | -0.04 | 0.01 | 2.51E-07  |
| FCRL3 | rs186021206 | 17 | 7166093   | A | G | 0.01 | 0.52  | 0.04 | 5.48E-19  |
| FCRL3 | rs34557412  | 17 | 16948873  | G | A | 0.01 | 0.35  | 0.03 | 4.87E-11  |
| FCRL5 | rs188468174 | 1  | 24965206  | T | C | 0.01 | -0.53 | 0.03 | 9.61E-30  |
| FCRL5 | -           | 1  | 157543980 | G | A | 0.21 | -0.49 | 0.01 | 4.65E-303 |
| FCRL5 | rs61804164  | 1  | 161653235 | C | G | 0.12 | -0.08 | 0.01 | 2.18E-06  |
| FCRL5 | -           | 6  | 411448    | A | G | 0.06 | -0.10 | 0.02 | 1.28E-05  |
| FCRL5 | rs9265986   | 6  | 31348504  | T | C | 0.32 | -0.06 | 0.01 | 9.24E-09  |
| FCRL5 | rs7797255   | 7  | 50312008  | G | A | 0.40 | -0.06 | 0.01 | 1.30E-07  |
| FCRL5 | -           | 11 | 128538755 | T | C | 0.52 | 0.05  | 0.01 | 8.07E-06  |
| FCRL5 | rs111338191 | 12 | 111388673 | T | A | 0.52 | -0.06 | 0.01 | 1.22E-07  |
| FCRL5 | rs76428106  | 13 | 28029870  | C | T | 0.01 | 0.23  | 0.03 | 1.21E-06  |
| FCRL5 | rs3803286   | 14 | 102780133 | G | A | 0.67 | -0.07 | 0.01 | 3.56E-09  |
| FCRL5 | rs11624491  | 14 | 105721708 | T | C | 0.66 | 0.17  | 0.01 | 1.36E-53  |
| FCRL5 | rs3803800   | 17 | 7559652   | G | A | 0.79 | -0.07 | 0.01 | 5.70E-09  |
| FCRL5 | rs34562254  | 17 | 16939677  | A | G | 0.10 | 0.16  | 0.01 | 8.37E-21  |
| FCRL5 | -           | 17 | 46185215  | C | A | 0.17 | -0.07 | 0.01 | 1.68E-05  |
| FCRL5 | rs754292    | 19 | 16589002  | T | C | 0.55 | -0.04 | 0.01 | 2.40E-05  |

|        |             |    |           |   |   |      |       |      |           |
|--------|-------------|----|-----------|---|---|------|-------|------|-----------|
| FCRL5  | -           | 22 | 30037182  | G | T | 0.45 | -0.06 | 0.01 | 1.15E-07  |
| FCRL6  | rs55650803  | 1  | 159813358 | T | C | 0.19 | -0.89 | 0.01 | 0.00E+00  |
| FCRL6  | rs2549006   | 5  | 132491373 | G | A | 0.67 | 0.06  | 0.01 | 3.02E-08  |
| FCRL6  | rs9270747   | 6  | 32600515  | G | A | 0.66 | 0.12  | 0.01 | 2.02E-33  |
| FCRL6  | rs756658243 | 11 | 128189307 | T | A | 0.29 | -0.08 | 0.01 | 2.13E-13  |
| FCRL6  | rs3184504   | 12 | 111446804 | C | T | 0.52 | -0.08 | 0.01 | 4.54E-17  |
| FCRL6  | rs186021206 | 17 | 7166093   | A | G | 0.01 | 0.31  | 0.04 | 5.37E-06  |
| FCRL6  | rs58745116  | 17 | 35476573  | A | G | 0.39 | -0.09 | 0.01 | 3.10E-18  |
| FCRL6  | -           | 17 | 81245700  | A | G | 0.44 | 0.04  | 0.01 | 1.33E-05  |
| FCRLB  | rs188468174 | 1  | 24965206  | T | C | 0.01 | -0.31 | 0.03 | 7.11E-10  |
| FCRLB  | rs61801180  | 1  | 161718974 | C | G | 0.06 | 1.36  | 0.02 | 0.00E+00  |
| FCRLB  | rs1973612   | 4  | 186248013 | T | C | 0.51 | -0.06 | 0.01 | 2.47E-10  |
| FCRLB  | rs7789913   | 7  | 50313099  | T | C | 0.40 | 0.06  | 0.01 | 2.20E-11  |
| FCRLB  | rs73169662  | 7  | 151225220 | C | T | 0.11 | 0.10  | 0.01 | 3.43E-12  |
| FCRLB  | rs7232      | 11 | 60173126  | A | T | 0.37 | 0.04  | 0.01 | 1.04E-05  |
| FCRLB  | rs186021206 | 17 | 7166093   | A | G | 0.01 | 0.33  | 0.04 | 3.19E-07  |
| FEN1   | rs10418046  | 19 | 53824615  | G | T | 0.21 | 0.06  | 0.01 | 7.21E-06  |
| FES    | rs1894401   | 15 | 90885812  | A | G | 0.52 | 0.13  | 0.01 | 6.75E-31  |
| FETUB  | rs1862069   | 2  | 169077231 | A | G | 0.54 | -0.05 | 0.01 | 4.92E-06  |
| FETUB  | rs114780909 | 3  | 186642466 | A | T | 0.01 | -2.13 | 0.04 | 8.63E-275 |
| FETUB  | rs28601761  | 8  | 125487789 | G | C | 0.42 | -0.12 | 0.01 | 9.84E-27  |
| FETUB  | rs11438680  | 10 | 63414938  | A | G | 0.46 | 0.08  | 0.01 | 2.23E-13  |
| FETUB  | rs150844304 | 15 | 43434427  | C | A | 0.02 | -0.27 | 0.02 | 1.00E-14  |
| FGF19  | rs3775076   | 4  | 39460353  | A | G | 0.36 | 0.10  | 0.01 | 4.95E-17  |
| FGF19  | rs4738684   | 8  | 58480714  | G | A | 0.67 | 0.10  | 0.01 | 2.82E-15  |
| FGF19  | rs8176741   | 9  | 133256074 | A | G | 0.06 | 0.17  | 0.02 | 7.80E-13  |
| FGF19  | rs708686    | 19 | 5840608   | T | C | 0.27 | 0.08  | 0.01 | 9.64E-09  |
| FGF19  | rs492602    | 19 | 48703160  | G | A | 0.51 | -0.23 | 0.01 | 3.78E-87  |
| FGF2   | rs1434282   | 1  | 199041592 | T | C | 0.73 | 0.06  | 0.01 | 6.15E-07  |
| FGF2   | rs1354034   | 3  | 56815721  | C | T | 0.60 | 0.06  | 0.01 | 1.43E-07  |
| FGF2   | rs2922979   | 4  | 122827461 | G | C | 0.31 | -0.71 | 0.01 | 0.00E+00  |
| FGF2   | rs6993770   | 8  | 105569300 | T | A | 0.29 | -0.12 | 0.01 | 9.09E-28  |
| FGF2   | rs3780420   | 9  | 97914884  | C | T | 0.37 | 0.05  | 0.01 | 4.03E-07  |
| FGF2   | rs34416903  | 16 | 88492837  | C | T | 0.28 | 0.05  | 0.01 | 6.35E-06  |
| FGF21  | rs1260326   | 2  | 27508073  | C | T | 0.61 | -0.14 | 0.01 | 6.31E-32  |
| FGF21  | rs1047891   | 2  | 210675783 | A | C | 0.31 | -0.06 | 0.01 | 4.86E-07  |
| FGF21  | rs35332062  | 7  | 73597712  | A | G | 0.13 | -0.16 | 0.01 | 2.06E-21  |
| FGF21  | rs3779195   | 7  | 98364050  | A | T | 0.18 | -0.08 | 0.01 | 7.45E-08  |
| FGF21  | rs112875651 | 8  | 125494452 | A | G | 0.39 | -0.06 | 0.01 | 1.22E-06  |
| FGF21  | rs62074055  | 17 | 47694567  | C | G | 0.50 | -0.05 | 0.01 | 3.30E-06  |
| FGF21  | rs838131    | 19 | 48757420  | C | A | 0.46 | -0.12 | 0.01 | 1.47E-26  |
| FGF23  | rs17199004  | 2  | 189588231 | G | T | 0.26 | 0.08  | 0.01 | 5.26E-09  |
| FGF23  | rs6862195   | 5  | 177395511 | T | G | 0.31 | -0.07 | 0.01 | 1.43E-08  |
| FGF23  | rs34357864  | 9  | 133270497 | A | G | 0.32 | 0.09  | 0.01 | 4.51E-13  |
| FGF23  | rs6489536   | 12 | 4382743   | C | G | 0.34 | 0.11  | 0.01 | 9.37E-20  |
| FGF23  | rs6561643   | 13 | 32934941  | T | A | 0.35 | 0.08  | 0.01 | 2.20E-10  |
| FGF23  | rs6127099   | 20 | 54114863  | T | A | 0.28 | -0.10 | 0.01 | 6.82E-14  |
| FGF5   | rs12509595  | 4  | 80261400  | C | T | 0.29 | 0.68  | 0.01 | 0.00E+00  |
| FGF5   | rs17580     | 14 | 94380925  | A | T | 0.05 | 0.11  | 0.01 | 4.52E-07  |
| FGFBP1 | rs7528419   | 1  | 109274570 | G | A | 0.22 | -0.11 | 0.01 | 4.99E-16  |
| FGFBP1 | rs61816761  | 1  | 152313385 | A | G | 0.02 | 0.17  | 0.02 | 9.94E-06  |
| FGFBP1 | -           | 2  | 21043902  | G | A | 0.34 | 0.06  | 0.01 | 4.72E-07  |
| FGFBP1 | rs1260326   | 2  | 27508073  | C | T | 0.61 | 0.05  | 0.01 | 2.90E-06  |
| FGFBP1 | rs6800909   | 3  | 187783783 | G | T | 0.29 | 0.06  | 0.01 | 2.88E-07  |
| FGFBP1 | rs9968276   | 4  | 15947928  | A | G | 0.20 | -0.12 | 0.01 | 1.41E-18  |
| FGFBP1 | rs9469004   | 6  | 31440119  | C | T | 0.15 | 0.07  | 0.01 | 3.30E-06  |



|        |             |    |           |   |   |      |       |      |          |
|--------|-------------|----|-----------|---|---|------|-------|------|----------|
| FGFBP1 | rs66717685  | 6  | 148600815 | G | C | 0.17 | 0.07  | 0.01 | 2.69E-05 |
| FGFBP1 | rs3184504   | 12 | 111446804 | C | T | 0.52 | 0.06  | 0.01 | 3.03E-07 |
| FGFBP1 | rs1077834   | 15 | 58431280  | C | T | 0.22 | 0.06  | 0.01 | 3.65E-06 |
| FGFBP1 | rs77542162  | 17 | 69085137  | G | A | 0.02 | 0.17  | 0.02 | 3.95E-06 |
| FGFBP1 | rs151113958 | 19 | 11080525  | G | A | 0.12 | -0.08 | 0.01 | 3.58E-06 |
| FGFBP1 | rs1065853   | 19 | 44909976  | T | G | 0.08 | -0.28 | 0.01 | 9.30E-44 |
| FGFBP1 | rs2074735   | 22 | 31139886  | C | G | 0.06 | 0.14  | 0.01 | 3.93E-10 |
| FGFR2  | rs36086195  | 1  | 16184399  | T | C | 0.58 | 0.06  | 0.01 | 6.44E-08 |
| FGFR2  | rs6968170   | 7  | 73606346  | A | G | 0.28 | -0.06 | 0.01 | 3.08E-06 |
| FGFR2  | rs7826120   | 8  | 58459166  | C | T | 0.67 | 0.06  | 0.01 | 1.55E-06 |
| FGFR2  | rs112875651 | 8  | 125494452 | A | G | 0.39 | -0.06 | 0.01 | 2.90E-07 |
| FGFR2  | rs505922    | 9  | 133273813 | C | T | 0.32 | 0.05  | 0.01 | 2.36E-05 |
| FGFR2  | rs2981430   | 10 | 121552184 | A | G | 0.58 | -0.11 | 0.01 | 5.72E-26 |
| FGFR2  | rs111632263 | 16 | 68199219  | A | T | 0.13 | 0.07  | 0.01 | 1.01E-05 |
| FGFR2  | rs186021206 | 17 | 7166093   | A | G | 0.01 | 0.53  | 0.05 | 1.07E-12 |
| FGR    | rs3737803   | 1  | 27634281  | A | G | 0.07 | -0.18 | 0.01 | 3.21E-16 |
| FHIT   | rs1354034   | 3  | 56815721  | C | T | 0.60 | 0.07  | 0.01 | 3.05E-08 |
| FHIT   | rs13070475  | 3  | 59983610  | A | G | 0.64 | 0.09  | 0.01 | 8.03E-13 |
| FIS1   | rs1354034   | 3  | 56815721  | C | T | 0.60 | 0.06  | 0.01 | 3.65E-07 |
| FIS1   | rs7778271   | 7  | 101231073 | C | T | 0.05 | -0.34 | 0.02 | 1.25E-43 |
| FIS1   | rs342293    | 7  | 106731773 | G | C | 0.46 | -0.05 | 0.01 | 2.20E-05 |
| FIS1   | rs10733789  | 10 | 63188924  | C | T | 0.31 | 0.06  | 0.01 | 1.84E-06 |
| FIS1   | rs73396521  | 11 | 267568    | A | G | 0.25 | 0.06  | 0.01 | 1.42E-05 |
| FKBP1B | rs872169    | 2  | 24036318  | G | C | 0.21 | -0.25 | 0.01 | 2.08E-73 |
| FKBP1B | rs1354034   | 3  | 56815721  | C | T | 0.60 | 0.08  | 0.01 | 3.82E-12 |
| FKBP1B | rs342299    | 7  | 106733272 | T | C | 0.46 | -0.07 | 0.01 | 4.32E-09 |
| FKBP1B | rs3847326   | 10 | 63572099  | G | A | 0.48 | -0.07 | 0.01 | 3.05E-10 |
| FKBP1B | rs11502185  | 11 | 180258    | C | T | 0.26 | 0.07  | 0.01 | 1.82E-06 |
| FKBP1B | rs200309755 | 17 | 29518756  | T | C | 0.54 | 0.07  | 0.01 | 1.68E-08 |
| FKBP4  | rs1354034   | 3  | 56815721  | C | T | 0.60 | 0.08  | 0.01 | 5.95E-13 |
| FKBP4  | rs342298    | 7  | 106733200 | T | C | 0.45 | -0.06 | 0.01 | 1.55E-06 |
| FKBP4  | rs6993770   | 8  | 105569300 | T | A | 0.29 | -0.06 | 0.01 | 2.09E-06 |
| FKBP4  | rs201265508 | 11 | 180231    | G | A | 0.29 | 0.07  | 0.01 | 2.41E-06 |
| FKBP4  | rs3814251   | 12 | 2794482   | C | T | 0.04 | -0.14 | 0.02 | 8.03E-06 |
| FKBP4  | rs60822569  | 12 | 54323724  | C | T | 0.55 | 0.06  | 0.01 | 2.53E-07 |
| FKBP4  | rs10774624  | 12 | 111395984 | A | G | 0.51 | -0.06 | 0.01 | 1.58E-06 |
| FKBP5  | rs1354034   | 3  | 56815721  | C | T | 0.60 | 0.05  | 0.01 | 5.39E-06 |
| FKBP5  | rs17622656  | 5  | 132485305 | A | G | 0.39 | -0.05 | 0.01 | 9.60E-06 |
| FKBP5  | rs2817032   | 6  | 35720842  | C | T | 0.29 | 0.21  | 0.01 | 1.10E-63 |
| FKBP5  | rs342293    | 7  | 106731773 | G | C | 0.46 | -0.05 | 0.01 | 8.45E-06 |
| FKBP5  | rs10822145  | 10 | 63174788  | T | C | 0.47 | 0.05  | 0.01 | 1.21E-05 |
| FKBP7  | -           | 2  | 178478419 | C | T | 0.00 | -0.73 | 0.06 | 2.35E-13 |
| FLI1   | rs1354034   | 3  | 56815721  | C | T | 0.60 | 0.06  | 0.01 | 3.79E-07 |
| FLI1   | rs6993770   | 8  | 105569300 | T | A | 0.29 | -0.07 | 0.01 | 3.80E-08 |
| FLI1   | rs12245149  | 10 | 63561387  | A | C | 0.49 | -0.05 | 0.01 | 3.87E-06 |
| FLRT2  | rs3748770   | 1  | 81800220  | A | G | 0.27 | 0.25  | 0.01 | 2.29E-98 |
| FLRT2  | rs1260326   | 2  | 27508073  | C | T | 0.61 | 0.05  | 0.01 | 7.87E-07 |
| FLRT2  | rs10935473  | 3  | 98698056  | T | G | 0.44 | -0.05 | 0.01 | 3.83E-07 |
| FLRT2  | rs6863407   | 5  | 167404689 | T | C | 0.72 | 0.06  | 0.01 | 8.81E-07 |
| FLRT2  | rs4841132   | 8  | 9326086   | G | A | 0.91 | -0.11 | 0.01 | 7.75E-10 |
| FLRT2  | rs10901252  | 9  | 133252613 | C | G | 0.06 | 0.10  | 0.01 | 1.21E-05 |
| FLRT2  | -           | 10 | 63184239  | A | T | 0.44 | 0.05  | 0.01 | 7.83E-06 |
| FLRT2  | rs141826184 | 12 | 57184132  | T | C | 0.00 | 0.43  | 0.05 | 3.20E-08 |
| FLRT2  | rs17646457  | 14 | 85622971  | A | G | 0.15 | -0.70 | 0.01 | 0.00E+00 |
| FLRT2  | rs77542162  | 17 | 69085137  | G | A | 0.02 | 0.22  | 0.02 | 4.40E-10 |
| FLRT2  | rs6135225   | 20 | 14697489  | T | G | 0.31 | -0.19 | 0.01 | 4.43E-64 |

|        |             |    |           |   |   |      |       |      |           |
|--------|-------------|----|-----------|---|---|------|-------|------|-----------|
| FLRT2  | rs3747207   | 22 | 43928975  | A | G | 0.22 | 0.05  | 0.01 | 2.68E-05  |
| FLT1   | rs13088856  | 3  | 159837169 | G | T | 0.30 | 0.07  | 0.01 | 3.77E-08  |
| FLT1   | rs13107325  | 4  | 102267552 | T | C | 0.08 | 0.11  | 0.01 | 9.06E-07  |
| FLT1   | rs6921438   | 6  | 43957870  | A | G | 0.49 | 0.34  | 0.01 | 1.35E-204 |
| FLT1   | rs79220982  | 8  | 10749162  | C | T | 0.14 | 0.07  | 0.01 | 1.83E-05  |
| FLT1   | rs6993770   | 8  | 105569300 | T | A | 0.29 | 0.10  | 0.01 | 5.77E-16  |
| FLT1   | rs34881325  | 9  | 2622134   | T | C | 0.38 | 0.06  | 0.01 | 2.49E-07  |
| FLT1   | rs2519093   | 9  | 133266456 | T | C | 0.18 | -0.18 | 0.01 | 9.07E-37  |
| FLT1   | rs552252905 | 13 | 28411879  | G | C | 0.00 | -1.14 | 0.11 | 3.49E-11  |
| FLT1   | rs200489612 | 17 | 7203059   | A | G | 0.01 | 0.50  | 0.05 | 2.11E-09  |
| FLT3   | rs2736100   | 5  | 1286401   | A | C | 0.50 | -0.05 | 0.01 | 1.30E-05  |
| FLT3   | rs62408224  | 6  | 90246276  | G | A | 0.35 | -0.06 | 0.01 | 1.54E-06  |
| FLT3   | rs35350651  | 12 | 111469627 | C | A | 0.50 | -0.07 | 0.01 | 1.58E-08  |
| FLT3   | rs12579868  | 12 | 120769344 | T | C | 0.47 | -0.07 | 0.01 | 2.91E-10  |
| FLT3   | rs9554228   | 13 | 28063701  | G | A | 0.63 | -0.08 | 0.01 | 1.25E-11  |
| FLT3   | rs186021206 | 17 | 7166093   | A | G | 0.01 | 0.63  | 0.05 | 4.86E-15  |
| FLT3LG | rs17534670  | 2  | 65388294  | A | G | 0.49 | 0.09  | 0.01 | 5.02E-19  |
| FLT3LG | rs2001703   | 3  | 128664254 | G | A | 0.62 | -0.12 | 0.01 | 4.06E-27  |
| FLT3LG | rs1344674   | 3  | 141406344 | G | A | 0.45 | -0.06 | 0.01 | 2.90E-07  |
| FLT3LG | rs218265    | 4  | 54542832  | C | T | 0.15 | -0.08 | 0.01 | 4.85E-07  |
| FLT3LG | -           | 4  | 104943372 | A | T | 0.03 | -0.33 | 0.02 | 7.98E-27  |
| FLT3LG | rs7705526   | 5  | 1285859   | A | C | 0.33 | -0.12 | 0.01 | 5.10E-26  |
| FLT3LG | rs56353819  | 6  | 90303148  | T | C | 0.35 | 0.07  | 0.01 | 3.30E-10  |
| FLT3LG | rs9487052   | 6  | 109295883 | T | C | 0.46 | 0.07  | 0.01 | 1.38E-09  |
| FLT3LG | rs42032     | 7  | 92608112  | A | G | 0.26 | -0.06 | 0.01 | 5.83E-06  |
| FLT3LG | rs2256187   | 11 | 78208722  | A | G | 0.15 | -0.06 | 0.01 | 2.18E-05  |
| FLT3LG | rs1800056   | 11 | 108267276 | C | T | 0.01 | -0.25 | 0.03 | 3.11E-08  |
| FLT3LG | rs4936290   | 11 | 114138533 | C | A | 0.35 | 0.06  | 0.01 | 3.15E-08  |
| FLT3LG | rs7137828   | 12 | 111494996 | T | C | 0.52 | 0.05  | 0.01 | 6.33E-07  |
| FLT3LG | rs76428106  | 13 | 28029870  | C | T | 0.01 | 1.31  | 0.03 | 7.50E-158 |
| FLT3LG | rs137952017 | 14 | 100709753 | T | C | 0.15 | 0.07  | 0.01 | 2.71E-05  |
| FLT3LG | rs4924248   | 15 | 38364053  | T | C | 0.76 | -0.06 | 0.01 | 1.63E-05  |
| FLT3LG | rs78378222  | 17 | 7668434   | G | T | 0.01 | -0.22 | 0.03 | 1.16E-05  |
| FLT3LG | rs80277818  | 18 | 44437936  | G | A | 0.13 | -0.08 | 0.01 | 2.49E-06  |
| FLT3LG | rs17758695  | 18 | 63253621  | T | C | 0.03 | 0.18  | 0.02 | 1.03E-08  |
| FLT3LG | rs117955557 | 19 | 45252110  | T | G | 0.26 | 0.06  | 0.01 | 4.93E-06  |
| FLT3LG | rs58527026  | 21 | 35036488  | A | G | 0.07 | 0.09  | 0.01 | 2.53E-05  |
| FLT3LG | -           | 21 | 38503544  | A | T | 0.39 | -0.05 | 0.01 | 2.60E-05  |
| FLT3LG | rs62237617  | 22 | 28365160  | T | C | 0.00 | -0.59 | 0.07 | 4.41E-07  |
| FLT4   | rs11162623  | 1  | 79093949  | T | C | 0.34 | 0.06  | 0.01 | 5.29E-10  |
| FLT4   | rs10935473  | 3  | 98698056  | T | G | 0.44 | -0.69 | 0.01 | 0.00E+00  |
| FLT4   | rs34221241  | 5  | 180630293 | C | T | 0.11 | -0.44 | 0.01 | 2.52E-173 |
| FLT4   | rs6913664   | 6  | 32328097  | T | C | 0.47 | -0.06 | 0.01 | 1.77E-10  |
| FLT4   | rs60988380  | 9  | 33117956  | T | C | 0.10 | 0.08  | 0.01 | 1.06E-06  |
| FLT4   | rs10981199  | 9  | 112004087 | C | T | 0.36 | 0.05  | 0.01 | 7.71E-07  |
| FLT4   | rs2519093   | 9  | 133266456 | T | C | 0.18 | -0.37 | 0.01 | 2.61E-195 |
| FLT4   | -           | 11 | 61774534  | G | A | 0.35 | 0.05  | 0.01 | 2.22E-07  |
| FLT4   | rs139130389 | 11 | 72139110  | A | C | 0.07 | -0.14 | 0.01 | 1.64E-13  |
| FLT4   | rs186021206 | 17 | 7166093   | A | G | 0.01 | 0.49  | 0.04 | 1.07E-13  |
| FLT4   | rs1012383   | 17 | 61118704  | T | G | 0.83 | -0.06 | 0.01 | 1.47E-05  |
| FLT4   | rs67525224  | 21 | 41255293  | C | G | 0.19 | 0.08  | 0.01 | 7.36E-11  |
| FLT4   | rs4611747   | 22 | 29361101  | T | C | 0.29 | 0.06  | 0.01 | 4.43E-08  |
| FLT4   | rs132653    | 22 | 36160775  | T | G | 0.82 | 0.06  | 0.01 | 3.07E-06  |
| FOLR1  | rs423144    | 1  | 155199564 | T | G | 0.43 | 0.06  | 0.01 | 5.97E-07  |
| FOLR1  | rs61747728  | 1  | 179557079 | T | C | 0.04 | 0.14  | 0.02 | 7.50E-07  |
| FOLR1  | rs13107325  | 4  | 102267552 | T | C | 0.08 | 0.10  | 0.01 | 1.01E-06  |

|       |             |    |           |   |   |      |       |      |          |
|-------|-------------|----|-----------|---|---|------|-------|------|----------|
| FOLR1 | rs10740131  | 10 | 63511728  | T | A | 0.47 | 0.05  | 0.01 | 2.98E-06 |
| FOLR1 | rs115974400 | 11 | 72167818  | C | T | 0.07 | -0.18 | 0.01 | 2.64E-16 |
| FOLR1 | rs777834943 | 16 | 20355409  | T | C | 0.18 | -0.07 | 0.01 | 7.70E-06 |
| FOLR1 | rs186021206 | 17 | 7166093   | A | G | 0.01 | 0.72  | 0.05 | 5.28E-22 |
| FOLR1 | rs78060698  | 19 | 5832762   | A | G | 0.04 | 0.21  | 0.02 | 5.84E-14 |
| FOLR1 | rs681343    | 19 | 48703205  | T | C | 0.51 | 0.11  | 0.01 | 9.38E-25 |
| FOLR2 | rs333947    | 1  | 109928142 | A | G | 0.15 | 0.08  | 0.01 | 3.14E-07 |
| FOLR2 | rs1260326   | 2  | 27508073  | C | T | 0.61 | 0.06  | 0.01 | 8.64E-07 |
| FOLR2 | -           | 2  | 196764807 | T | A | 0.18 | -0.08 | 0.01 | 1.43E-08 |
| FOLR2 | rs11918606  | 3  | 31004162  | G | A | 0.31 | 0.05  | 0.01 | 2.72E-05 |
| FOLR2 | rs2140574   | 3  | 99071378  | T | C | 0.62 | -0.07 | 0.01 | 7.93E-10 |
| FOLR2 | rs509227    | 6  | 10535358  | C | A | 0.52 | 0.06  | 0.01 | 1.18E-07 |
| FOLR2 | rs80177780  | 6  | 32522644  | A | C | 0.75 | 0.11  | 0.01 | 5.27E-16 |
| FOLR2 | rs17138358  | 7  | 17880630  | C | G | 0.39 | -0.06 | 0.01 | 7.58E-09 |
| FOLR2 | rs7865362   | 9  | 33117967  | T | C | 0.36 | 0.08  | 0.01 | 9.08E-13 |
| FOLR2 | rs2519093   | 9  | 133266456 | T | C | 0.18 | 0.06  | 0.01 | 2.49E-05 |
| FOLR2 | rs603424    | 10 | 100315722 | A | G | 0.17 | -0.11 | 0.01 | 3.50E-13 |
| FOLR2 | rs950803    | 11 | 60385090  | A | T | 0.63 | 0.10  | 0.01 | 5.35E-20 |
| FOLR2 | rs146893981 | 11 | 72206309  | T | C | 0.03 | 0.32  | 0.02 | 4.97E-23 |
| FOLR2 | rs61729512  | 12 | 7485173   | A | G | 0.12 | 0.26  | 0.01 | 1.04E-53 |
| FOLR2 | -           | 12 | 120884101 | C | A | 0.69 | -0.06 | 0.01 | 1.05E-05 |
| FOLR2 | rs4760      | 19 | 43648948  | G | A | 0.16 | 0.14  | 0.01 | 5.16E-22 |
| FOLR2 | rs12975366  | 19 | 54255498  | C | T | 0.40 | -0.14 | 0.01 | 1.44E-36 |
| FOLR3 | rs333947    | 1  | 109928142 | A | G | 0.15 | 0.06  | 0.01 | 1.46E-05 |
| FOLR3 | -           | 2  | 196768245 | G | C | 0.20 | -0.05 | 0.01 | 5.46E-06 |
| FOLR3 | rs62235167  | 3  | 31011191  | G | C | 0.31 | 0.04  | 0.01 | 1.08E-05 |
| FOLR3 | rs2470870   | 3  | 98976917  | T | C | 0.57 | -0.05 | 0.01 | 7.35E-09 |
| FOLR3 | rs70993902  | 6  | 32627073  | C | T | 0.78 | 0.07  | 0.01 | 2.52E-11 |
| FOLR3 | rs10242866  | 7  | 17880990  | T | C | 0.39 | -0.05 | 0.01 | 1.09E-07 |
| FOLR3 | rs2031902   | 9  | 33117526  | T | C | 0.59 | -0.06 | 0.01 | 6.47E-11 |
| FOLR3 | rs603424    | 10 | 100315722 | A | G | 0.17 | -0.07 | 0.01 | 2.36E-09 |
| FOLR3 | rs950802    | 11 | 60385111  | A | G | 0.31 | 0.08  | 0.01 | 3.85E-10 |
| FOLR3 | rs139130389 | 11 | 72139110  | A | C | 0.07 | 1.69  | 0.01 | 0.00E+00 |
| FOLR3 | rs61729512  | 12 | 7485173   | A | G | 0.12 | 0.16  | 0.01 | 6.39E-31 |
| FOLR3 | rs4760      | 19 | 43648948  | G | A | 0.16 | 0.08  | 0.01 | 3.31E-11 |
| FOLR3 | rs12975366  | 19 | 54255498  | C | T | 0.40 | -0.09 | 0.01 | 6.41E-25 |
| FOXO1 | rs342298    | 7  | 106733200 | T | C | 0.46 | -0.08 | 0.01 | 2.31E-13 |
| FOXO1 | rs10820606  | 9  | 96430637  | C | A | 0.23 | -0.12 | 0.01 | 6.73E-19 |
| FOXO1 | rs4759076   | 12 | 54336088  | C | T | 0.46 | 0.07  | 0.01 | 5.43E-09 |
| FOXO1 | rs17061453  | 13 | 40610221  | T | A | 0.04 | 0.28  | 0.02 | 4.74E-24 |
| FOXO3 | rs74379225  | 6  | 32638965  | G | A | 0.06 | 0.12  | 0.02 | 3.80E-06 |
| FRZB  | rs13009     | 2  | 182834637 | T | C | 0.08 | -0.82 | 0.01 | 0.00E+00 |
| FRZB  | rs11452310  | 3  | 12478870  | A | T | 0.57 | 0.05  | 0.01 | 9.83E-06 |
| FRZB  | rs2856694   | 6  | 32684504  | C | T | 0.19 | -0.15 | 0.01 | 1.98E-28 |
| FRZB  | rs35350651  | 12 | 111469627 | C | A | 0.50 | -0.05 | 0.01 | 1.38E-07 |
| FRZB  | rs6018652   | 20 | 47712230  | A | G | 0.79 | -0.06 | 0.01 | 8.77E-06 |
| FST   | rs1260326   | 2  | 27508073  | C | T | 0.61 | -0.11 | 0.01 | 1.55E-21 |
| FST   | rs31226     | 5  | 54031741  | C | T | 0.60 | -0.14 | 0.01 | 2.65E-35 |
| FST   | rs55707100  | 15 | 43528519  | T | C | 0.02 | 0.17  | 0.02 | 4.33E-06 |
| FSTL3 | rs77924615  | 16 | 20381010  | A | G | 0.20 | -0.08 | 0.01 | 3.50E-08 |
| FSTL3 | rs4919884   | 19 | 669546    | C | T | 0.84 | 0.11  | 0.01 | 7.53E-14 |
| FUCA1 | rs13551     | 1  | 23854472  | C | T | 0.34 | -0.38 | 0.00 | 0.00E+00 |
| FUCA1 | -           | 4  | 6609511   | T | G | 0.18 | 0.15  | 0.01 | 9.81E-76 |
| FUCA1 | rs11155297  | 6  | 143503967 | T | G | 0.26 | -1.29 | 0.01 | 0.00E+00 |
| FUCA1 | rs4764823   | 12 | 101825988 | A | G | 0.29 | -0.09 | 0.00 | 5.48E-39 |
| FUCA1 | rs148815576 | 14 | 93219142  | G | T | 0.00 | 0.39  | 0.05 | 4.00E-07 |

|           |             |    |           |   |   |      |       |      |           |
|-----------|-------------|----|-----------|---|---|------|-------|------|-----------|
| FUCA1     | rs339969    | 15 | 60591082  | A | C | 0.62 | 0.03  | 0.00 | 1.85E-05  |
| FUCA1     | -           | 19 | 19321481  | A | G | 0.07 | 0.07  | 0.01 | 3.68E-08  |
| FURIN     | rs1260326   | 2  | 27508073  | C | T | 0.61 | -0.10 | 0.01 | 7.47E-18  |
| FURIN     | rs34430945  | 7  | 73629335  | C | T | 0.13 | -0.08 | 0.01 | 5.09E-06  |
| FURIN     | rs6227      | 15 | 90882002  | T | C | 0.33 | 0.20  | 0.01 | 7.53E-62  |
| FUS       | rs1354034   | 3  | 56815721  | C | T | 0.60 | 0.05  | 0.01 | 6.18E-06  |
| FUS       | rs10418046  | 19 | 53824615  | G | T | 0.21 | 0.10  | 0.01 | 5.14E-13  |
| FUT3_FUT5 | rs5860563   | 4  | 99126006  | A | C | 0.70 | -0.06 | 0.01 | 1.37E-09  |
| FUT3_FUT5 | rs2106854   | 5  | 132433482 | T | C | 0.19 | -0.05 | 0.01 | 2.71E-05  |
| FUT3_FUT5 | rs34434863  | 6  | 32591896  | G | T | 0.31 | 0.05  | 0.01 | 2.73E-06  |
| FUT3_FUT5 | rs28601761  | 8  | 125487789 | G | C | 0.42 | 0.07  | 0.01 | 7.37E-13  |
| FUT3_FUT5 | rs62542743  | 9  | 33385243  | A | C | 0.05 | 0.10  | 0.01 | 4.98E-06  |
| FUT3_FUT5 | -           | 10 | 5204247   | A | C | 0.14 | 0.06  | 0.01 | 8.86E-06  |
| FUT3_FUT5 | rs56278466  | 10 | 17833858  | G | T | 0.66 | 0.07  | 0.01 | 6.98E-13  |
| FUT3_FUT5 | rs9738365   | 12 | 31844701  | A | C | 0.27 | 0.09  | 0.01 | 5.78E-16  |
| FUT3_FUT5 | rs112158477 | 12 | 111328642 | T | C | 0.15 | 0.06  | 0.01 | 1.30E-05  |
| FUT3_FUT5 | rs2393791   | 12 | 120986153 | T | C | 0.62 | 0.14  | 0.01 | 3.86E-43  |
| FUT3_FUT5 | rs178765    | 14 | 23237529  | A | G | 0.28 | 0.07  | 0.01 | 7.66E-10  |
| FUT3_FUT5 | rs11868058  | 17 | 47563039  | T | G | 0.51 | -0.04 | 0.01 | 1.52E-05  |
| FUT3_FUT5 | rs3760775   | 19 | 5841345   | T | G | 0.06 | -1.06 | 0.01 | 0.00E+00  |
| FUT3_FUT5 | rs58542926  | 19 | 19268740  | T | C | 0.08 | 0.11  | 0.01 | 8.18E-08  |
| FUT3_FUT5 | rs492602    | 19 | 48703160  | G | A | 0.51 | -0.08 | 0.01 | 6.44E-14  |
| FUT3_FUT5 | rs6073431   | 20 | 44411929  | T | C | 0.53 | 0.05  | 0.01 | 4.89E-06  |
| FUT8      | rs7618405   | 3  | 18209017  | A | C | 0.21 | -0.06 | 0.01 | 1.03E-05  |
| FUT8      | rs1354034   | 3  | 56815721  | C | T | 0.60 | -0.06 | 0.01 | 8.49E-10  |
| FUT8      | rs3804753   | 3  | 123132993 | G | A | 0.59 | -0.05 | 0.01 | 7.12E-06  |
| FUT8      | rs13434472  | 4  | 101878353 | A | C | 0.40 | -0.05 | 0.01 | 5.08E-07  |
| FUT8      | rs10075801  | 5  | 132341949 | G | A | 0.49 | -0.05 | 0.01 | 8.92E-07  |
| FUT8      | rs138614581 | 6  | 31436393  | T | A | 0.08 | -0.08 | 0.01 | 1.20E-05  |
| FUT8      | rs6961069   | 7  | 80589645  | T | C | 0.40 | 0.05  | 0.01 | 4.37E-07  |
| FUT8      | rs6993770   | 8  | 105569300 | T | A | 0.29 | -0.15 | 0.01 | 1.00E-41  |
| FUT8      | -           | 10 | 63433569  | C | T | 0.49 | -0.06 | 0.01 | 4.69E-10  |
| FUT8      | rs71474568  | 10 | 102589091 | G | T | 0.34 | 0.06  | 0.01 | 1.27E-07  |
| FUT8      | rs10774625  | 12 | 111472415 | G | A | 0.50 | -0.04 | 0.01 | 2.41E-05  |
| FUT8      | rs2127870   | 14 | 65330128  | C | G | 0.80 | -0.91 | 0.01 | 0.00E+00  |
| FUT8      | rs12445050  | 16 | 81837364  | T | C | 0.14 | 0.09  | 0.01 | 1.12E-09  |
| FUT8      | rs892090    | 19 | 55027704  | G | T | 0.83 | 0.13  | 0.01 | 5.05E-22  |
| FUT8      | rs6112319   | 20 | 19336421  | A | G | 0.35 | 0.05  | 0.01 | 5.83E-07  |
| FXN       | rs1354034   | 3  | 56815721  | C | T | 0.60 | 0.06  | 0.01 | 1.94E-06  |
| FXN       | rs6993770   | 8  | 105569300 | T | A | 0.29 | -0.06 | 0.01 | 2.08E-06  |
| FXN       | rs112450466 | 9  | 69215313  | A | T | 0.38 | 0.08  | 0.01 | 6.35E-11  |
| FXN       | rs10733789  | 10 | 63188924  | C | T | 0.31 | 0.06  | 0.01 | 8.51E-06  |
| FXN       | rs60822569  | 12 | 54323724  | C | T | 0.55 | 0.06  | 0.01 | 1.65E-06  |
| FXYD5     | rs1354034   | 3  | 56815721  | C | T | 0.60 | 0.08  | 0.01 | 3.57E-11  |
| FXYD5     | rs7896518   | 10 | 63344740  | G | A | 0.42 | 0.06  | 0.01 | 2.38E-06  |
| FXYD5     | rs756845    | 19 | 35172347  | G | A | 0.78 | -0.38 | 0.01 | 1.84E-160 |
| FYB1      | rs1354034   | 3  | 56815721  | C | T | 0.60 | 0.07  | 0.01 | 3.19E-10  |
| FYB1      | rs112838960 | 5  | 132373340 | A | T | 0.52 | 0.06  | 0.01 | 7.13E-08  |
| FYB1      | rs892090    | 19 | 55027704  | G | T | 0.83 | 0.07  | 0.01 | 2.29E-05  |
| GAL       | rs320366    | 1  | 117585523 | T | C | 0.75 | -0.06 | 0.01 | 6.44E-07  |
| GAL       | rs760077    | 1  | 155208991 | T | A | 0.60 | -0.08 | 0.01 | 1.20E-13  |
| GAL       | rs28631481  | 1  | 218678805 | T | C | 0.38 | 0.05  | 0.01 | 8.21E-06  |
| GAL       | rs11680123  | 2  | 60287613  | G | A | 0.59 | 0.19  | 0.01 | 3.11E-72  |
| GAL       | rs121908120 | 2  | 218890289 | A | T | 0.03 | -0.25 | 0.02 | 4.18E-14  |
| GAL       | rs1530018   | 2  | 224060404 | G | A | 0.23 | -0.08 | 0.01 | 1.35E-09  |
| GAL       | rs3773364   | 3  | 12148468  | G | A | 0.16 | 0.20  | 0.01 | 5.49E-43  |

|         |             |    |           |   |   |      |       |      |           |
|---------|-------------|----|-----------|---|---|------|-------|------|-----------|
| GAL     | rs6820414   | 4  | 38357645  | G | C | 0.59 | -0.05 | 0.01 | 9.72E-06  |
| GAL     | rs17134145  | 6  | 1670090   | A | C | 0.11 | 0.14  | 0.01 | 5.32E-17  |
| GAL     | rs560623757 | 6  | 36749100  | T | C | 0.10 | 0.12  | 0.01 | 3.74E-11  |
| GAL     | rs13284054  | 9  | 104906792 | C | T | 0.12 | -0.07 | 0.01 | 2.04E-05  |
| GAL     | rs7070183   | 10 | 95219370  | T | A | 0.47 | 0.05  | 0.01 | 1.64E-05  |
| GAL     | rs565427    | 11 | 65765354  | A | G | 0.36 | 0.06  | 0.01 | 9.50E-09  |
| GAL     | rs3018721   | 11 | 68656221  | G | A | 0.08 | 0.15  | 0.01 | 9.26E-14  |
| GAL     | rs2540119   | 12 | 4031710   | C | T | 0.76 | -0.06 | 0.01 | 3.51E-06  |
| GAL     | rs9601479   | 13 | 80868601  | A | G | 0.51 | 0.05  | 0.01 | 6.39E-06  |
| GAL     | rs36034702  | 15 | 90191395  | T | C | 0.17 | -0.09 | 0.01 | 3.26E-09  |
| GAL     | rs720130    | 16 | 11038776  | T | G | 0.41 | -0.06 | 0.01 | 3.01E-07  |
| GAL     | rs56156922  | 16 | 56953457  | C | T | 0.32 | 0.07  | 0.01 | 1.34E-10  |
| GAL     | rs77542162  | 17 | 69085137  | G | A | 0.02 | 0.73  | 0.02 | 9.71E-94  |
| GAL     | rs55949690  | 17 | 72058283  | A | G | 0.52 | 0.05  | 0.01 | 8.86E-06  |
| GAL     | rs1884371   | 20 | 39524198  | C | G | 0.55 | 0.05  | 0.01 | 3.53E-06  |
| GAL     | rs6024978   | 20 | 56590011  | C | A | 0.23 | -0.07 | 0.01 | 3.05E-07  |
| GALNT10 | rs4672497   | 2  | 62296430  | G | C | 0.22 | 0.07  | 0.01 | 3.20E-07  |
| GALNT10 | rs890793    | 5  | 154194378 | T | C | 0.38 | 0.38  | 0.01 | 3.55E-246 |
| GALNT10 | -           | 9  | 133276163 | T | A | 0.19 | 0.26  | 0.01 | 1.86E-77  |
| GALNT10 | rs56278466  | 10 | 17833858  | G | T | 0.66 | 0.06  | 0.01 | 3.19E-07  |
| GALNT10 | rs2695294   | 12 | 101693236 | A | G | 0.58 | 0.06  | 0.01 | 1.39E-07  |
| GALNT10 | rs3184504   | 12 | 111446804 | C | T | 0.52 | -0.05 | 0.01 | 5.17E-07  |
| GALNT10 | rs145078947 | 14 | 93186629  | T | G | 0.00 | 0.56  | 0.07 | 1.16E-07  |
| GALNT10 | rs704       | 17 | 28367840  | A | G | 0.47 | 0.09  | 0.01 | 3.11E-16  |
| GALNT10 | rs601338    | 19 | 48703417  | A | G | 0.51 | 0.05  | 0.01 | 4.62E-06  |
| GALNT10 | rs892090    | 19 | 55027704  | G | T | 0.83 | 0.07  | 0.01 | 5.07E-06  |
| GALNT2  | rs4846914   | 1  | 230159944 | A | G | 0.61 | 0.29  | 0.01 | 2.47E-153 |
| GALNT2  | rs9273216   | 6  | 32645969  | A | C | 0.55 | -0.05 | 0.01 | 2.94E-06  |
| GALNT2  | rs9987289   | 8  | 9325848   | G | A | 0.91 | -0.08 | 0.01 | 8.20E-06  |
| GALNT2  | rs12359178  | 10 | 17847614  | A | G | 0.14 | 0.07  | 0.01 | 5.27E-06  |
| GALNT2  | rs201220977 | 10 | 63305512  | T | C | 0.47 | 0.05  | 0.01 | 2.77E-05  |
| GALNT2  | rs8181612   | 12 | 89510921  | A | T | 0.71 | -0.13 | 0.01 | 2.00E-27  |
| GALNT2  | -           | 16 | 72045090  | T | G | 0.18 | 0.32  | 0.01 | 7.19E-113 |
| GALNT2  | rs704       | 17 | 28367840  | A | G | 0.47 | 0.08  | 0.01 | 1.66E-14  |
| GALNT2  | rs12975366  | 19 | 54255498  | C | T | 0.40 | -0.15 | 0.01 | 1.89E-41  |
| GALNT3  | rs2116546   | 2  | 165867023 | C | T | 0.30 | -0.39 | 0.01 | 3.42E-216 |
| GALNT3  | rs9310400   | 3  | 12247950  | T | C | 0.33 | 0.05  | 0.01 | 7.72E-06  |
| GALNT3  | rs13107325  | 4  | 102267552 | T | C | 0.07 | -0.12 | 0.01 | 4.74E-08  |
| GALNT3  | rs9391787   | 6  | 32480839  | C | T | 0.59 | 0.06  | 0.01 | 6.52E-07  |
| GALNT3  | rs7791957   | 7  | 7230403   | C | T | 0.43 | 0.09  | 0.01 | 1.26E-17  |
| GALNT3  | rs782134971 | 9  | 133264504 | G | C | 0.25 | 0.31  | 0.01 | 1.02E-132 |
| GALNT3  | rs3184504   | 12 | 111446804 | C | T | 0.52 | -0.08 | 0.01 | 8.92E-13  |
| GALNT3  | rs145078947 | 14 | 93186629  | T | G | 0.00 | 0.52  | 0.07 | 1.66E-06  |
| GALNT3  | rs535064984 | 17 | 7116978   | C | T | 0.01 | 0.35  | 0.05 | 1.35E-06  |
| GALNT3  | rs492602    | 19 | 48703160  | G | A | 0.51 | -0.18 | 0.01 | 4.05E-62  |
| GALNT7  | rs13107325  | 4  | 102267552 | T | C | 0.08 | -0.14 | 0.01 | 1.77E-10  |
| GALNT7  | rs144873913 | 4  | 173314153 | A | C | 0.00 | -0.87 | 0.07 | 6.93E-14  |
| GALNT7  | rs11755689  | 6  | 32618599  | G | A | 0.33 | 0.07  | 0.01 | 2.42E-09  |
| GALNT7  | rs1404422   | 7  | 17795362  | C | A | 0.51 | -0.06 | 0.01 | 7.61E-07  |
| GALNT7  | rs117905808 | 7  | 100911510 | A | G | 0.02 | 0.72  | 0.03 | 5.06E-70  |
| GALNT7  | rs139130389 | 11 | 72139110  | A | C | 0.07 | 0.12  | 0.01 | 1.08E-07  |
| GALNT7  | rs11054859  | 12 | 7617180   | A | G | 0.10 | 0.15  | 0.01 | 3.03E-16  |
| GALNT7  | rs534297892 | 12 | 120911539 | C | A | 0.50 | 0.05  | 0.01 | 7.67E-06  |
| GALNT7  | rs9534300   | 13 | 46055090  | T | A | 0.71 | -0.12 | 0.01 | 5.99E-22  |
| GALNT7  | rs12975366  | 19 | 54255498  | C | T | 0.39 | -0.22 | 0.01 | 1.64E-80  |
| GAS6    | rs56073752  | 2  | 9477232   | A | G | 0.51 | 0.05  | 0.01 | 1.17E-05  |

|       |             |    |           |   |   |      |       |      |           |
|-------|-------------|----|-----------|---|---|------|-------|------|-----------|
| GAS6  | rs1260326   | 2  | 27508073  | C | T | 0.61 | 0.06  | 0.01 | 4.19E-07  |
| GAS6  | rs1257168   | 2  | 134206321 | G | A | 0.50 | -0.05 | 0.01 | 2.48E-05  |
| GAS6  | rs1983009   | 3  | 98839204  | T | C | 0.10 | 0.10  | 0.01 | 1.40E-07  |
| GAS6  | rs13108218  | 4  | 3442204   | G | A | 0.62 | 0.05  | 0.01 | 1.12E-05  |
| GAS6  | rs149893883 | 4  | 98980406  | T | C | 0.67 | -0.05 | 0.01 | 5.06E-06  |
| GAS6  | rs112840324 | 6  | 32510881  | G | A | 0.71 | 0.08  | 0.01 | 1.67E-08  |
| GAS6  | rs17138358  | 7  | 17880630  | C | G | 0.39 | -0.05 | 0.01 | 2.17E-06  |
| GAS6  | rs17145750  | 7  | 73612048  | T | C | 0.16 | 0.07  | 0.01 | 1.37E-06  |
| GAS6  | rs12667978  | 7  | 129137407 | T | C | 0.57 | 0.06  | 0.01 | 1.92E-07  |
| GAS6  | rs4841132   | 8  | 9326086   | G | A | 0.91 | -0.13 | 0.01 | 8.73E-12  |
| GAS6  | rs4876611   | 8  | 115659621 | G | A | 0.72 | 0.07  | 0.01 | 1.15E-09  |
| GAS6  | rs11230313  | 11 | 60436568  | C | A | 0.33 | -0.05 | 0.01 | 1.17E-05  |
| GAS6  | rs6602909   | 13 | 113849020 | C | T | 0.32 | -0.34 | 0.01 | 9.53E-183 |
| GAS6  | rs150844304 | 15 | 43434427  | C | A | 0.02 | -0.16 | 0.02 | 5.01E-06  |
| GAS6  | rs186021206 | 17 | 7166093   | A | G | 0.01 | 1.07  | 0.05 | 6.54E-48  |
| GAS6  | rs897764    | 19 | 35068720  | C | T | 0.94 | -0.11 | 0.01 | 2.40E-06  |
| GAS6  | rs66841352  | 19 | 41233275  | C | G | 0.40 | -0.22 | 0.01 | 1.79E-87  |
| GAS6  | rs3747207   | 22 | 43928975  | A | G | 0.22 | 0.08  | 0.01 | 4.05E-09  |
| GBP2  | rs7531439   | 1  | 89088541  | C | A | 0.79 | 0.12  | 0.01 | 7.27E-18  |
| GBP4  | rs608339    | 1  | 89186395  | T | A | 0.51 | -0.81 | 0.01 | 0.00E+00  |
| GCG   | rs1260326   | 2  | 27508073  | C | T | 0.61 | -0.05 | 0.01 | 1.83E-05  |
| GCG   | rs17145750  | 7  | 73612048  | T | C | 0.16 | -0.09 | 0.01 | 9.96E-08  |
| GCG   | rs39275     | 7  | 90145856  | G | A | 0.53 | 0.05  | 0.01 | 7.02E-06  |
| GCG   | rs964184    | 11 | 116778201 | C | G | 0.87 | -0.08 | 0.01 | 8.95E-06  |
| GCG   | rs72654473  | 19 | 44911142  | A | C | 0.11 | 0.09  | 0.01 | 6.24E-07  |
| GCNT1 | rs2009581   | 2  | 111050100 | A | G | 0.27 | -0.06 | 0.01 | 9.57E-07  |
| GCNT1 | rs35829610  | 5  | 132488170 | G | C | 0.34 | -0.06 | 0.01 | 1.48E-08  |
| GCNT1 | rs2282683   | 9  | 76502835  | G | A | 0.21 | -0.49 | 0.01 | 1.27E-298 |
| GCNT1 | rs505922    | 9  | 133273813 | C | T | 0.32 | 0.07  | 0.01 | 8.84E-10  |
| GCNT1 | rs561088406 | 10 | 17770126  | A | G | 0.09 | 0.10  | 0.01 | 1.25E-06  |
| GCNT1 | rs61377406  | 11 | 122664422 | T | G | 0.36 | -0.05 | 0.01 | 1.55E-05  |
| GCNT1 | rs3184504   | 12 | 111446804 | C | T | 0.52 | -0.13 | 0.01 | 7.79E-34  |
| GCNT1 | rs492602    | 19 | 48703160  | G | A | 0.51 | -0.07 | 0.01 | 2.70E-11  |
| GDF15 | rs1054221   | 19 | 18389048  | C | T | 0.15 | 0.39  | 0.01 | 1.51E-185 |
| GDF2  | rs34008398  | 2  | 68866281  | A | G | 0.01 | -0.24 | 0.03 | 4.86E-07  |
| GDF2  | rs68066031  | 2  | 224015781 | C | T | 0.23 | 0.16  | 0.01 | 1.18E-39  |
| GDF2  | rs66530140  | 4  | 186240057 | C | T | 0.51 | 0.09  | 0.01 | 2.89E-18  |
| GDF2  | rs78408340  | 5  | 103003035 | G | C | 0.01 | -0.30 | 0.03 | 2.83E-08  |
| GDF2  | rs10820966  | 9  | 92293147  | T | A | 0.33 | -0.18 | 0.01 | 5.81E-57  |
| GDF2  | rs9414801   | 10 | 63389329  | A | G | 0.53 | -0.06 | 0.01 | 5.92E-09  |
| GDF2  | rs67852477  | 10 | 69097207  | G | C | 0.01 | 0.32  | 0.03 | 1.00E-09  |
| GDF2  | rs12284180  | 11 | 126395606 | C | A | 0.25 | 0.05  | 0.01 | 2.19E-05  |
| GDF2  | rs3184504   | 12 | 111446804 | C | T | 0.52 | 0.05  | 0.01 | 5.70E-06  |
| GDF2  | rs7152610   | 14 | 94462135  | C | T | 0.85 | -0.15 | 0.01 | 3.89E-25  |
| GDF2  | rs4702      | 15 | 90883330  | A | G | 0.56 | 0.06  | 0.01 | 8.09E-08  |
| GDF2  | rs12441560  | 15 | 101445718 | A | G | 0.27 | 0.06  | 0.01 | 5.00E-07  |
| GDF2  | rs77303550  | 16 | 72045758  | T | C | 0.20 | -0.07 | 0.01 | 8.76E-08  |
| GDF2  | rs186021206 | 17 | 7166093   | A | G | 0.01 | 0.48  | 0.05 | 4.53E-11  |
| GDNF  | rs62360373  | 5  | 37820639  | A | G | 0.10 | -0.39 | 0.01 | 7.46E-94  |
| GDNF  | rs4808305   | 19 | 14690145  | C | T | 0.32 | 0.07  | 0.01 | 6.01E-08  |
| GFAP  | rs150394890 | 1  | 223676678 | T | G | 0.01 | -0.46 | 0.04 | 1.73E-15  |
| GFAP  | rs17737955  | 2  | 86280891  | T | C | 0.40 | 0.05  | 0.01 | 9.49E-06  |
| GFAP  | rs147795230 | 3  | 81641847  | C | T | 0.00 | 1.30  | 0.11 | 2.25E-14  |
| GFAP  | rs5011436   | 7  | 12229132  | C | A | 0.42 | -0.06 | 0.01 | 5.37E-08  |
| GFAP  | rs5893529   | 8  | 100664952 | T | A | 0.46 | 0.05  | 0.01 | 4.08E-07  |
| GFAP  | rs7114754   | 11 | 65203925  | C | T | 0.08 | -0.14 | 0.01 | 8.32E-13  |

|       |             |    |           |   |   |      |       |      |           |
|-------|-------------|----|-----------|---|---|------|-------|------|-----------|
| GFAP  | rs59291670  | 17 | 44914081  | T | C | 0.02 | 0.28  | 0.02 | 7.14E-15  |
| GFAP  | rs429358    | 19 | 44908684  | C | T | 0.16 | 0.10  | 0.01 | 9.77E-13  |
| GFER  | rs61516948  | 16 | 1973321   | T | C | 0.13 | -0.10 | 0.01 | 4.83E-09  |
| GFRA1 | rs10982156  | 9  | 114325784 | A | T | 0.07 | 0.18  | 0.01 | 7.37E-17  |
| GFRA1 | rs11197603  | 10 | 116242259 | C | T | 0.15 | -0.31 | 0.01 | 3.55E-90  |
| GFRA1 | rs6041      | 13 | 113118393 | A | G | 0.10 | -0.21 | 0.01 | 1.03E-33  |
| GFRA1 | rs34262842  | 16 | 20344489  | G | A | 0.17 | -0.07 | 0.01 | 2.38E-06  |
| GFRA2 | rs13107325  | 4  | 102267552 | T | C | 0.08 | 0.11  | 0.01 | 7.83E-07  |
| GFRA2 | rs115216147 | 5  | 71369699  | A | T | 0.07 | 0.10  | 0.01 | 1.18E-05  |
| GFRA2 | rs9275544   | 6  | 32708576  | G | A | 0.23 | -0.09 | 0.01 | 5.66E-11  |
| GFRA2 | rs1480999   | 8  | 21616577  | A | G | 0.56 | 0.31  | 0.01 | 1.10E-154 |
| GFRA2 | rs603424    | 10 | 100315722 | A | G | 0.17 | -0.07 | 0.01 | 1.45E-05  |
| GFRA2 | rs186021206 | 17 | 7166093   | A | G | 0.01 | 0.82  | 0.05 | 2.51E-27  |
| GFRA2 | rs10405357  | 19 | 54255803  | C | T | 0.44 | -0.05 | 0.01 | 7.38E-06  |
| GFRA3 | rs12027119  | 1  | 59687013  | G | A | 0.67 | -0.05 | 0.01 | 5.97E-06  |
| GFRA3 | rs35383942  | 1  | 201468704 | T | C | 0.06 | 0.11  | 0.01 | 1.96E-06  |
| GFRA3 | rs12710696  | 2  | 19121042  | C | T | 0.64 | -0.06 | 0.01 | 3.31E-07  |
| GFRA3 | rs73158489  | 3  | 154040073 | T | C | 0.16 | 0.08  | 0.01 | 2.73E-07  |
| GFRA3 | rs13107325  | 4  | 102267552 | T | C | 0.07 | 0.14  | 0.01 | 4.66E-11  |
| GFRA3 | rs12654231  | 5  | 110341005 | G | A | 0.04 | 0.16  | 0.02 | 1.96E-08  |
| GFRA3 | rs56259296  | 5  | 138144920 | A | T | 0.37 | 0.09  | 0.01 | 4.34E-13  |
| GFRA3 | rs62405538  | 6  | 10324463  | T | A | 0.21 | -0.06 | 0.01 | 6.08E-06  |
| GFRA3 | rs10956755  | 8  | 134290713 | G | A | 0.30 | -0.05 | 0.01 | 1.44E-05  |
| GFRA3 | rs56278466  | 10 | 17833858  | G | T | 0.66 | 0.08  | 0.01 | 4.11E-12  |
| GFRA3 | rs10887793  | 10 | 88231148  | T | G | 0.45 | 0.06  | 0.01 | 1.94E-08  |
| GFRA3 | rs10840586  | 11 | 11148261  | G | A | 0.37 | 0.05  | 0.01 | 2.35E-05  |
| GFRA3 | rs10742826  | 11 | 48071893  | T | C | 0.68 | 0.06  | 0.01 | 4.73E-07  |
| GFRA3 | rs78689694  | 11 | 126364925 | C | G | 0.13 | -0.08 | 0.01 | 3.70E-06  |
| GFRA3 | rs11830324  | 12 | 510452    | A | T | 0.17 | -0.14 | 0.01 | 4.75E-21  |
| GFRA3 | rs1161106   | 12 | 67446687  | A | C | 0.12 | -0.08 | 0.01 | 1.03E-05  |
| GFRA3 | rs1618875   | 12 | 115306576 | T | C | 0.49 | 0.21  | 0.01 | 1.27E-81  |
| GFRA3 | -           | 15 | 38081910  | G | T | 0.88 | -0.09 | 0.01 | 1.68E-07  |
| GFRA3 | rs2306333   | 15 | 50925477  | G | A | 0.17 | 0.07  | 0.01 | 3.05E-06  |
| GFRA3 | rs186021206 | 17 | 7166093   | A | G | 0.01 | 0.54  | 0.05 | 1.18E-12  |
| GFRA3 | rs11655511  | 17 | 61209908  | T | C | 0.77 | 0.10  | 0.01 | 2.02E-15  |
| GFRA3 | rs3744052   | 17 | 76561975  | T | C | 0.21 | 0.07  | 0.01 | 1.73E-07  |
| GFRA3 | rs554743    | 20 | 3681495   | T | C | 0.69 | -0.05 | 0.01 | 9.28E-06  |
| GGH   | rs114165349 | 1  | 26695422  | C | G | 0.02 | 0.20  | 0.02 | 5.82E-08  |
| GGH   | -           | 3  | 136181921 | A | T | 0.70 | 0.06  | 0.01 | 7.52E-08  |
| GGH   | rs451637    | 6  | 32027005  | T | C | 0.31 | -0.06 | 0.01 | 3.77E-07  |
| GGH   | rs1513275   | 7  | 28219614  | C | T | 0.19 | 0.07  | 0.01 | 2.28E-06  |
| GGH   | rs74329104  | 8  | 63018637  | A | G | 0.07 | 0.72  | 0.01 | 5.21E-222 |
| GGH   | rs6488368   | 12 | 7508506   | G | A | 0.97 | -0.24 | 0.02 | 6.64E-13  |
| GGH   | rs10778152  | 12 | 101831973 | G | A | 0.29 | -0.25 | 0.01 | 1.72E-100 |
| GGH   | rs117230571 | 13 | 41114931  | G | A | 0.08 | 0.10  | 0.01 | 3.26E-06  |
| GGH   | rs139974673 | 15 | 43735687  | C | T | 0.02 | 0.16  | 0.02 | 3.24E-06  |
| GGH   | rs768736886 | 16 | 53459434  | A | T | 0.30 | 0.07  | 0.01 | 1.19E-08  |
| GGH   | rs199737620 | 17 | 46137699  | A | T | 0.20 | 0.07  | 0.01 | 9.44E-07  |
| GGH   | rs12970396  | 18 | 62441936  | A | G | 0.30 | 0.06  | 0.01 | 3.09E-06  |
| GGH   | rs58542926  | 19 | 19268740  | T | C | 0.08 | 0.10  | 0.01 | 3.16E-06  |
| GGH   | rs12986064  | 19 | 54251270  | C | T | 0.51 | -0.10 | 0.01 | 1.38E-19  |
| GGT1  | rs924204    | 1  | 16187431  | G | A | 0.59 | 0.07  | 0.01 | 7.02E-10  |
| GGT1  | rs4665972   | 2  | 27375230  | C | T | 0.61 | -0.05 | 0.01 | 1.53E-05  |
| GGT1  | rs4835265   | 4  | 145900258 | A | C | 0.16 | 0.09  | 0.01 | 2.83E-10  |
| GGT1  | rs11426880  | 11 | 58618576  | T | A | 0.24 | -0.05 | 0.01 | 2.43E-05  |
| GGT1  | rs7970695   | 12 | 120985573 | A | G | 0.62 | 0.13  | 0.01 | 2.53E-35  |

|        |             |    |           |   |   |      |       |      |           |
|--------|-------------|----|-----------|---|---|------|-------|------|-----------|
| GGT1   | rs59643720  | 14 | 103098470 | C | A | 0.24 | 0.07  | 0.01 | 1.43E-09  |
| GGT1   | rs4998040   | 18 | 58426767  | A | G | 0.79 | -0.06 | 0.01 | 6.34E-07  |
| GGT1   | rs2006227   | 22 | 24599789  | A | C | 0.34 | 0.25  | 0.01 | 1.18E-118 |
| GGT5   | rs74612335  | 11 | 126368738 | C | T | 0.13 | -0.10 | 0.01 | 2.73E-10  |
| GGT5   | rs186021206 | 17 | 7166093   | A | G | 0.01 | 0.64  | 0.05 | 1.21E-16  |
| GGT5   | rs75016991  | 17 | 69428367  | A | C | 0.03 | 0.16  | 0.02 | 8.99E-06  |
| GGT5   | rs5760275   | 22 | 24247481  | G | C | 0.21 | 0.33  | 0.01 | 3.61E-122 |
| GHRL   | rs751198981 | 2  | 221201933 | T | G | 0.20 | -0.08 | 0.01 | 1.27E-07  |
| GHRL   | rs34911341  | 3  | 10289835  | T | C | 0.01 | 1.39  | 0.05 | 3.71E-87  |
| GHRL   | rs7438696   | 4  | 26517243  | T | G | 0.28 | 0.07  | 0.01 | 5.94E-08  |
| GHRL   | rs10470729  | 4  | 71041953  | T | C | 0.73 | 0.07  | 0.01 | 4.22E-08  |
| GHRL   | rs11745870  | 5  | 170195796 | T | C | 0.31 | -0.08 | 0.01 | 2.29E-10  |
| GHRL   | rs868223    | 8  | 20293584  | A | G | 0.67 | 0.05  | 0.01 | 1.55E-05  |
| GHRL   | rs11786721  | 8  | 142678761 | C | T | 0.41 | 0.07  | 0.01 | 8.49E-10  |
| GHRL   | rs4500149   | 9  | 110707168 | A | G | 0.42 | 0.06  | 0.01 | 2.34E-08  |
| GHRL   | rs8176746   | 9  | 133255935 | T | G | 0.06 | -0.16 | 0.01 | 5.11E-12  |
| GHRL   | rs558760274 | 17 | 336083    | C | A | 0.79 | 0.06  | 0.01 | 7.83E-06  |
| GHRL   | rs17138478  | 17 | 37713312  | A | C | 0.13 | 0.08  | 0.01 | 2.06E-06  |
| GHRL   | rs34954997  | 19 | 44914381  | G | C | 0.24 | 0.07  | 0.01 | 4.43E-07  |
| GHRL   | rs6129534   | 20 | 40256219  | T | G | 0.30 | 0.07  | 0.01 | 2.23E-09  |
| GKN1   | rs760077    | 1  | 155208991 | T | A | 0.60 | -0.05 | 0.01 | 2.39E-05  |
| GKN1   | rs71469854  | 11 | 1193912   | T | C | 0.18 | 0.09  | 0.01 | 1.08E-08  |
| GKN1   | rs601338    | 19 | 48703417  | A | G | 0.51 | -0.08 | 0.01 | 5.72E-13  |
| GKN1   | rs4816636   | 21 | 39654583  | G | T | 0.75 | 0.06  | 0.01 | 3.51E-06  |
| GLB1   | rs114165349 | 1  | 26695422  | C | G | 0.02 | 0.17  | 0.02 | 3.33E-06  |
| GLB1   | rs7637133   | 3  | 33097271  | A | C | 0.62 | 0.23  | 0.01 | 7.02E-93  |
| GLB1   | rs687339    | 3  | 136213517 | T | C | 0.77 | 0.07  | 0.01 | 8.34E-08  |
| GLB1   | rs76778371  | 6  | 159997018 | A | G | 0.09 | -0.09 | 0.01 | 7.36E-06  |
| GLB1   | rs1293303   | 8  | 11862718  | C | G | 0.45 | 0.07  | 0.01 | 1.30E-11  |
| GLB1   | rs10778152  | 12 | 101831973 | G | A | 0.29 | -0.29 | 0.01 | 6.52E-125 |
| GLB1   | rs150641790 | 13 | 41113708  | G | T | 0.07 | 0.10  | 0.01 | 9.31E-07  |
| GLB1   | rs145078947 | 14 | 93186629  | T | G | 0.00 | 0.70  | 0.07 | 4.93E-11  |
| GLB1   | -           | 17 | 46143803  | C | A | 0.28 | 0.06  | 0.01 | 2.66E-06  |
| GLB1   | rs58542926  | 19 | 19268740  | T | C | 0.08 | 0.19  | 0.01 | 3.31E-21  |
| GLB1   | rs142042446 | 19 | 44883210  | A | G | 0.15 | -0.07 | 0.01 | 9.98E-06  |
| GLO1   | rs4746      | 6  | 38682852  | G | T | 0.46 | -0.33 | 0.01 | 4.36E-187 |
| GLOD4  | rs1354034   | 3  | 56815721  | C | T | 0.60 | 0.06  | 0.01 | 1.56E-06  |
| GLOD4  | rs6993770   | 8  | 105569300 | T | A | 0.29 | -0.06 | 0.01 | 1.74E-05  |
| GLOD4  | rs150230220 | 10 | 63142032  | T | A | 0.31 | 0.06  | 0.01 | 6.88E-07  |
| GLRX   | rs6556886   | 5  | 95827745  | A | G | 0.13 | -0.74 | 0.01 | 0.00E+00  |
| GLRX   | rs11759553  | 6  | 135101158 | T | A | 0.27 | -0.06 | 0.01 | 2.17E-08  |
| GLT8D2 | rs117801489 | 12 | 104015054 | C | T | 0.02 | 0.68  | 0.03 | 1.68E-51  |
| GMPR   | rs1042391   | 6  | 16290530  | A | T | 0.38 | 0.25  | 0.01 | 8.95E-110 |
| GMPR   | rs342293    | 7  | 106731773 | G | C | 0.46 | -0.05 | 0.01 | 2.26E-05  |
| GNE    | rs1354034   | 3  | 56815721  | C | T | 0.60 | 0.13  | 0.01 | 2.18E-28  |
| GNE    | rs6993770   | 8  | 105569300 | T | A | 0.29 | -0.06 | 0.01 | 8.89E-06  |
| GNE    | rs7090758   | 10 | 63575555  | C | T | 0.48 | -0.05 | 0.01 | 6.05E-06  |
| GNE    | rs11502185  | 11 | 180258    | C | T | 0.26 | 0.07  | 0.01 | 2.93E-06  |
| GNYL   | rs144015106 | 1  | 24748081  | G | A | 0.01 | -0.49 | 0.04 | 2.50E-14  |
| GNYL   | rs628745    | 1  | 56941254  | C | T | 0.33 | 0.05  | 0.01 | 5.05E-07  |
| GNYL   | rs7545591   | 1  | 185426714 | G | C | 0.32 | 0.05  | 0.01 | 9.51E-07  |
| GNYL   | rs7577293   | 2  | 85708159  | T | C | 0.23 | 0.70  | 0.01 | 0.00E+00  |
| GNYL   | rs73069104  | 3  | 47239243  | C | T | 0.36 | 0.07  | 0.01 | 4.99E-11  |
| GNYL   | rs11711157  | 3  | 194341097 | T | C | 0.28 | -0.06 | 0.01 | 9.09E-07  |
| GNYL   | rs4869313   | 5  | 96888176  | G | T | 0.55 | -0.07 | 0.01 | 1.48E-11  |
| GNYL   | rs9368661   | 6  | 31188264  | T | C | 0.26 | 0.12  | 0.01 | 6.02E-27  |



|       |             |    |           |   |   |      |       |      |           |
|-------|-------------|----|-----------|---|---|------|-------|------|-----------|
| GNLY  | -           | 9  | 136944238 | C | T | 0.52 | 0.07  | 0.01 | 7.10E-12  |
| GNLY  | rs8177651   | 10 | 5973427   | A | T | 0.32 | 0.05  | 0.01 | 1.84E-06  |
| GNLY  | rs745932882 | 10 | 92682235  | A | G | 0.46 | 0.05  | 0.01 | 1.24E-07  |
| GNLY  | rs4919420   | 10 | 100046495 | G | A | 0.42 | -0.07 | 0.01 | 1.54E-10  |
| GNLY  | rs7137828   | 12 | 111494996 | T | C | 0.52 | -0.05 | 0.01 | 5.97E-06  |
| GNLY  | rs9916257   | 17 | 35470352  | T | G | 0.44 | -0.05 | 0.01 | 1.62E-07  |
| GOLM2 | -           | 1  | 199025567 | T | A | 0.72 | 0.06  | 0.01 | 2.70E-06  |
| GOLM2 | rs35316636  | 2  | 85312167  | A | C | 0.51 | 0.05  | 0.01 | 6.55E-06  |
| GOLM2 | rs10804823  | 3  | 168092778 | T | A | 0.49 | 0.05  | 0.01 | 7.38E-06  |
| GOLM2 | rs13107325  | 4  | 102267552 | T | C | 0.08 | -0.10 | 0.01 | 1.32E-06  |
| GOLM2 | rs1265905   | 6  | 31942164  | G | A | 0.13 | -0.11 | 0.01 | 2.83E-11  |
| GOLM2 | rs41266341  | 6  | 158585341 | C | A | 0.01 | 0.40  | 0.04 | 1.73E-11  |
| GOLM2 | rs550057    | 9  | 133271182 | T | C | 0.26 | 0.26  | 0.01 | 5.12E-92  |
| GOLM2 | rs171052    | 11 | 117211047 | G | C | 0.23 | 0.21  | 0.01 | 6.71E-58  |
| GOLM2 | rs10777172  | 12 | 89500490  | C | T | 0.71 | 0.20  | 0.01 | 6.73E-58  |
| GOLM2 | rs550761239 | 15 | 44378276  | T | C | 0.00 | 0.56  | 0.06 | 1.61E-08  |
| GOLM2 | rs77542162  | 17 | 69085137  | G | A | 0.02 | 0.23  | 0.02 | 8.90E-10  |
| GOPC  | rs1354034   | 3  | 56815721  | C | T | 0.60 | 0.08  | 0.01 | 5.38E-11  |
| GOPC  | rs6993770   | 8  | 105569300 | T | A | 0.29 | -0.06 | 0.01 | 8.77E-06  |
| GOPC  | rs11502185  | 11 | 180258    | C | T | 0.26 | 0.08  | 0.01 | 2.93E-07  |
| GP1BA | rs3767809   | 1  | 117612209 | C | T | 0.22 | 0.07  | 0.01 | 2.58E-06  |
| GP1BA | rs1434282   | 1  | 199041592 | T | C | 0.73 | 0.06  | 0.01 | 3.33E-06  |
| GP1BA | rs3804749   | 3  | 123114156 | T | C | 0.59 | -0.05 | 0.01 | 2.61E-05  |
| GP1BA | rs78565404  | 3  | 184372454 | T | C | 0.05 | 0.14  | 0.02 | 1.30E-07  |
| GP1BA | rs2853677   | 5  | 1287079   | A | G | 0.58 | -0.05 | 0.01 | 7.92E-06  |
| GP1BA | rs35786788  | 6  | 135097904 | A | G | 0.25 | 0.10  | 0.01 | 1.23E-14  |
| GP1BA | rs6961069   | 7  | 80589645  | T | C | 0.40 | 0.06  | 0.01 | 3.32E-07  |
| GP1BA | rs6993770   | 8  | 105569300 | T | A | 0.29 | -0.12 | 0.01 | 1.00E-22  |
| GP1BA | rs385893    | 9  | 4763176   | C | T | 0.52 | 0.11  | 0.01 | 6.09E-21  |
| GP1BA | rs12762934  | 10 | 102600127 | T | C | 0.32 | 0.06  | 0.01 | 6.17E-06  |
| GP1BA | rs11217176  | 11 | 119194334 | A | G | 0.27 | 0.07  | 0.01 | 2.60E-07  |
| GP1BA | rs7944186   | 11 | 126419473 | G | A | 0.53 | -0.09 | 0.01 | 8.96E-14  |
| GP1BA | rs3184504   | 12 | 111446804 | C | T | 0.52 | -0.13 | 0.01 | 1.16E-32  |
| GP1BA | rs2127870   | 14 | 65330128  | C | G | 0.79 | 0.07  | 0.01 | 6.59E-06  |
| GP1BA | rs1555405   | 14 | 100710432 | A | G | 0.25 | -0.07 | 0.01 | 1.65E-07  |
| GP1BA | rs7176023   | 15 | 64808808  | C | T | 0.07 | 0.12  | 0.01 | 6.84E-07  |
| GP1BA | rs553749201 | 17 | 4933900   | A | C | 0.05 | -0.26 | 0.02 | 2.31E-23  |
| GP2   | rs6571015   | 6  | 96086602  | A | G | 0.79 | 0.15  | 0.01 | 2.25E-32  |
| GP2   | rs6459924   | 7  | 159115383 | C | T | 0.24 | -0.06 | 0.01 | 1.28E-07  |
| GP2   | rs505922    | 9  | 133273813 | C | T | 0.32 | 0.55  | 0.01 | 0.00E+00  |
| GP2   | rs2163150   | 10 | 48127889  | C | T | 0.66 | -0.05 | 0.01 | 1.80E-05  |
| GP2   | rs10858917  | 12 | 89695013  | A | G | 0.80 | 0.06  | 0.01 | 3.31E-06  |
| GP2   | rs1129818   | 16 | 20317363  | C | T | 0.46 | -0.23 | 0.01 | 1.02E-112 |
| GP2   | rs200489612 | 17 | 7203059   | A | G | 0.01 | 0.37  | 0.05 | 2.35E-06  |
| GP2   | rs708686    | 19 | 5840608   | T | C | 0.27 | 0.06  | 0.01 | 4.89E-08  |
| GP2   | rs492602    | 19 | 48703160  | G | A | 0.51 | 0.17  | 0.01 | 7.12E-60  |
| GP6   | rs1354034   | 3  | 56815721  | C | T | 0.60 | 0.06  | 0.01 | 1.87E-07  |
| GP6   | rs17622656  | 5  | 132485305 | A | G | 0.39 | -0.05 | 0.01 | 3.85E-06  |
| GP6   | rs6993770   | 8  | 105569300 | T | A | 0.29 | -0.08 | 0.01 | 1.08E-09  |
| GP6   | rs3847326   | 10 | 63572099  | G | A | 0.48 | -0.06 | 0.01 | 4.14E-07  |
| GP6   | rs10774624  | 12 | 111395984 | A | G | 0.51 | -0.05 | 0.01 | 2.03E-05  |
| GP6   | rs892090    | 19 | 55027704  | G | T | 0.83 | 0.41  | 0.01 | 5.72E-156 |
| GPA33 | rs72689400  | 1  | 167068982 | A | C | 0.02 | -0.67 | 0.03 | 2.63E-55  |
| GPA33 | rs2241764   | 2  | 132417191 | T | C | 0.34 | -0.09 | 0.01 | 1.76E-15  |
| GPA33 | rs6437071   | 2  | 232704083 | A | G | 0.42 | -0.08 | 0.01 | 1.96E-11  |
| GPA33 | rs13065564  | 3  | 70915893  | G | T | 0.31 | -0.05 | 0.01 | 2.59E-05  |

|       |             |    |           |   |   |      |       |      |           |
|-------|-------------|----|-----------|---|---|------|-------|------|-----------|
| GPA33 | rs9816553   | 3  | 154239261 | A | G | 0.85 | -0.09 | 0.01 | 1.47E-08  |
| GPA33 | rs939885    | 3  | 196228891 | A | G | 0.48 | 0.07  | 0.01 | 6.99E-10  |
| GPA33 | rs533067298 | 4  | 133569430 | C | T | 0.51 | -0.05 | 0.01 | 8.01E-06  |
| GPA33 | rs9478784   | 6  | 150699194 | T | C | 0.10 | 0.12  | 0.01 | 7.66E-11  |
| GPA33 | rs11142461  | 9  | 68444973  | C | T | 0.04 | -0.16 | 0.02 | 3.36E-07  |
| GPA33 | -           | 9  | 133263362 | G | A | 0.18 | -0.09 | 0.01 | 1.38E-10  |
| GPA33 | rs2291428   | 10 | 45463408  | C | G | 0.24 | -0.08 | 0.01 | 6.27E-11  |
| GPA33 | rs56398830  | 13 | 103049340 | A | G | 0.01 | -0.89 | 0.03 | 8.14E-66  |
| GPA33 | rs35193388  | 16 | 4370816   | C | G | 0.74 | -0.07 | 0.01 | 4.05E-09  |
| GPA33 | rs12938714  | 17 | 30318092  | A | G | 0.33 | 0.17  | 0.01 | 1.33E-46  |
| GPA33 | -           | 17 | 39383590  | C | T | 0.26 | 0.07  | 0.01 | 4.47E-07  |
| GPA33 | rs681343    | 19 | 48703205  | T | C | 0.51 | -0.21 | 0.01 | 9.78E-80  |
| GPA33 | rs3746778   | 20 | 62710120  | A | G | 0.42 | 0.07  | 0.01 | 7.55E-10  |
| GPC1  | rs1856027   | 1  | 93078574  | C | T | 0.62 | 0.08  | 0.01 | 2.33E-12  |
| GPC1  | rs150816167 | 1  | 179602727 | C | T | 0.04 | 0.12  | 0.02 | 7.90E-06  |
| GPC1  | rs2273967   | 1  | 230279547 | T | C | 0.25 | 0.07  | 0.01 | 6.12E-09  |
| GPC1  | rs71414736  | 2  | 127104369 | G | C | 0.02 | -0.20 | 0.02 | 4.06E-07  |
| GPC1  | rs143362987 | 2  | 170111430 | A | G | 0.01 | -0.27 | 0.03 | 5.17E-07  |
| GPC1  | rs77078946  | 2  | 240464000 | G | T | 0.11 | 0.50  | 0.01 | 5.06E-190 |
| GPC1  | rs568092436 | 4  | 102931225 | A | C | 0.43 | -0.05 | 0.01 | 1.91E-05  |
| GPC1  | rs3796500   | 4  | 128285828 | C | T | 0.20 | -0.06 | 0.01 | 2.76E-05  |
| GPC1  | rs3965330   | 5  | 177622441 | A | G | 0.47 | 0.19  | 0.01 | 4.79E-69  |
| GPC1  | rs4633028   | 8  | 39052342  | G | A | 0.77 | -0.08 | 0.01 | 8.55E-11  |
| GPC1  | rs2625445   | 8  | 60627769  | A | G | 0.24 | -0.07 | 0.01 | 7.30E-09  |
| GPC1  | rs7835610   | 8  | 90696825  | T | C | 0.50 | -0.06 | 0.01 | 1.69E-08  |
| GPC1  | rs11414746  | 9  | 33150411  | A | T | 0.42 | 0.08  | 0.01 | 3.45E-12  |
| GPC1  | -           | 9  | 137464104 | T | C | 0.08 | -0.14 | 0.01 | 1.01E-11  |
| GPC1  | rs56278466  | 10 | 17833858  | G | T | 0.66 | 0.06  | 0.01 | 1.47E-07  |
| GPC1  | rs1081975   | 12 | 55999553  | G | C | 0.42 | 0.05  | 0.01 | 3.23E-06  |
| GPC1  | rs9318186   | 13 | 73532802  | G | A | 0.56 | -0.05 | 0.01 | 3.41E-06  |
| GPC1  | rs7147722   | 14 | 49645994  | T | G | 0.54 | 0.10  | 0.01 | 2.21E-22  |
| GPC1  | rs1801689   | 17 | 66214462  | C | A | 0.03 | 0.19  | 0.02 | 8.03E-10  |
| GPC1  | rs737939    | 22 | 29919427  | T | G | 0.41 | 0.06  | 0.01 | 1.97E-07  |
| GPC5  | rs1434282   | 1  | 199041592 | T | C | 0.73 | 0.05  | 0.01 | 1.47E-05  |
| GPC5  | rs1260326   | 2  | 27508073  | C | T | 0.61 | -0.06 | 0.01 | 1.12E-09  |
| GPC5  | rs1354034   | 3  | 56815721  | C | T | 0.60 | -0.05 | 0.01 | 2.08E-06  |
| GPC5  | rs9468900   | 6  | 31225221  | A | G | 0.23 | -0.05 | 0.01 | 1.03E-05  |
| GPC5  | rs6993770   | 8  | 105569300 | T | A | 0.29 | -0.06 | 0.01 | 5.42E-09  |
| GPC5  | rs28601761  | 8  | 125487789 | G | C | 0.42 | -0.05 | 0.01 | 3.37E-07  |
| GPC5  | rs7979478   | 12 | 120982460 | G | A | 0.62 | 0.05  | 0.01 | 1.69E-07  |
| GPC5  | rs342706    | 13 | 91764804  | C | T | 0.27 | -0.88 | 0.01 | 0.00E+00  |
| GPC5  | rs28734133  | 16 | 81840430  | G | A | 0.18 | 0.05  | 0.01 | 2.59E-05  |
| GPC5  | rs1654425   | 19 | 55027612  | C | T | 0.83 | 0.09  | 0.01 | 3.19E-13  |
| GNPMB | rs4665972   | 2  | 27375230  | C | T | 0.61 | 0.05  | 0.01 | 2.38E-05  |
| GNPMB | rs11721064  | 3  | 98689982  | T | G | 0.61 | -0.06 | 0.01 | 7.26E-08  |
| GNPMB | rs12203592  | 6  | 396321    | T | C | 0.22 | -0.08 | 0.01 | 5.37E-08  |
| GNPMB | rs75801644  | 7  | 23266522  | A | G | 0.02 | -1.11 | 0.03 | 3.05E-185 |
| GNPMB | rs74612335  | 11 | 126368738 | C | T | 0.13 | -0.09 | 0.01 | 3.99E-08  |
| GNPMB | rs186021206 | 17 | 7166093   | A | G | 0.01 | 0.74  | 0.05 | 8.75E-23  |
| GPR37 | rs780094    | 2  | 27518370  | C | T | 0.62 | -0.08 | 0.01 | 5.67E-16  |
| GPR37 | rs511154    | 3  | 136232079 | G | A | 0.77 | 0.07  | 0.01 | 3.01E-10  |
| GPR37 | rs13235543  | 7  | 73599571  | T | C | 0.13 | -0.11 | 0.01 | 1.93E-10  |
| GPR37 | rs4141005   | 7  | 124488565 | C | A | 0.26 | -0.78 | 0.01 | 0.00E+00  |
| GPR37 | rs112875651 | 8  | 125494452 | A | G | 0.39 | -0.09 | 0.01 | 6.65E-19  |
| GPR37 | rs11023881  | 11 | 16225154  | A | T | 0.39 | 0.06  | 0.01 | 2.01E-09  |
| GPR37 | rs964184    | 11 | 116778201 | C | G | 0.87 | -0.06 | 0.01 | 1.81E-05  |

|        |             |    |           |   |   |      |       |      |           |
|--------|-------------|----|-----------|---|---|------|-------|------|-----------|
| GPR37  | rs10083137  | 12 | 24045244  | G | A | 0.03 | 0.22  | 0.02 | 1.95E-16  |
| GPR37  | rs1292066   | 17 | 59854953  | A | T | 0.21 | 0.06  | 0.01 | 2.46E-07  |
| GPR37  | rs390082    | 19 | 44913574  | G | T | 0.11 | 0.09  | 0.01 | 3.86E-08  |
| GRAP2  | rs1354034   | 3  | 56815721  | C | T | 0.60 | 0.05  | 0.01 | 9.21E-06  |
| GRAP2  | rs6993770   | 8  | 105569300 | T | A | 0.29 | -0.06 | 0.01 | 1.61E-06  |
| GRAP2  | rs148328786 | 22 | 39946989  | G | A | 0.01 | 0.31  | 0.03 | 2.31E-09  |
| GRK5   | rs10886430  | 10 | 119250744 | G | A | 0.13 | -0.40 | 0.01 | 7.45E-116 |
| GRN    | rs12740374  | 1  | 109274968 | T | G | 0.22 | -0.67 | 0.01 | 0.00E+00  |
| GRN    | rs75029704  | 6  | 29881729  | T | C | 0.10 | 0.16  | 0.01 | 1.47E-19  |
| GRN    | rs2021716   | 6  | 90231570  | T | C | 0.35 | -0.05 | 0.01 | 2.40E-05  |
| GRN    | rs12666320  | 7  | 130375535 | G | C | 0.12 | 0.07  | 0.01 | 7.64E-06  |
| GRN    | rs1137827   | 9  | 133254328 | T | C | 0.06 | 0.11  | 0.01 | 3.01E-07  |
| GRN    | rs885828    | 10 | 71818746  | A | G | 0.29 | -0.24 | 0.01 | 1.43E-96  |
| GRN    | rs2298475   | 11 | 126408308 | C | T | 0.08 | -0.10 | 0.01 | 2.50E-07  |
| GRN    | rs111524607 | 12 | 120665220 | T | C | 0.29 | -0.05 | 0.01 | 1.79E-05  |
| GRN    | rs72802342  | 16 | 75200974  | A | C | 0.08 | -0.20 | 0.01 | 1.83E-23  |
| GRN    | rs149044215 | 16 | 89638692  | A | G | 0.37 | 0.05  | 0.01 | 1.88E-05  |
| GRN    | rs186021206 | 17 | 7166093   | A | G | 0.01 | 0.70  | 0.05 | 5.95E-23  |
| GRN    | rs5848      | 17 | 44352876  | T | C | 0.27 | -0.25 | 0.01 | 9.43E-105 |
| GRN    | rs1065853   | 19 | 44909976  | T | G | 0.08 | 0.10  | 0.01 | 2.68E-07  |
| GRPEL1 | rs4361977   | 1  | 155103603 | T | C | 0.43 | -0.05 | 0.01 | 3.67E-06  |
| GRPEL1 | rs4835265   | 4  | 145900258 | A | C | 0.16 | 0.11  | 0.01 | 7.40E-12  |
| GRPEL1 | rs4940391   | 18 | 58438636  | G | A | 0.82 | -0.09 | 0.01 | 1.56E-08  |
| GSAP   | rs73333648  | 10 | 98404359  | G | C | 0.05 | -0.13 | 0.02 | 4.08E-07  |
| GSTA1  | rs28383314  | 6  | 32619436  | C | T | 0.63 | 0.06  | 0.01 | 1.38E-06  |
| GSTA1  | rs6458871   | 6  | 52801179  | T | C | 0.57 | 0.31  | 0.01 | 3.55E-173 |
| GSTA1  | rs112875651 | 8  | 125494452 | A | G | 0.39 | -0.06 | 0.01 | 9.87E-07  |
| GSTA1  | rs10733608  | 9  | 114386150 | T | G | 0.49 | -0.07 | 0.01 | 2.58E-09  |
| GSTA1  | rs10883451  | 10 | 100164661 | C | T | 0.50 | -0.05 | 0.01 | 1.52E-06  |
| GSTA1  | rs4753124   | 11 | 94090069  | G | C | 0.11 | -0.08 | 0.01 | 1.41E-05  |
| GSTA1  | rs28929474  | 14 | 94378610  | T | C | 0.02 | 0.21  | 0.02 | 4.40E-08  |
| GSTA1  | rs10405357  | 19 | 54255803  | C | T | 0.44 | -0.06 | 0.01 | 1.22E-07  |
| GSTA1  | rs3747207   | 22 | 43928975  | A | G | 0.22 | 0.11  | 0.01 | 1.54E-15  |
| GSTA3  | rs6458871   | 6  | 52801179  | T | C | 0.57 | 0.31  | 0.01 | 2.84E-161 |
| GSTA3  | rs28601761  | 8  | 125487789 | G | C | 0.42 | -0.05 | 0.01 | 2.62E-05  |
| GSTA3  | rs11370710  | 9  | 114396677 | A | C | 0.49 | -0.05 | 0.01 | 2.09E-05  |
| GSTA3  | rs10883451  | 10 | 100164661 | C | T | 0.50 | -0.05 | 0.01 | 2.04E-05  |
| GSTA3  | rs28929474  | 14 | 94378610  | T | C | 0.02 | 0.21  | 0.03 | 1.42E-07  |
| GSTA3  | rs738409    | 22 | 43928847  | G | C | 0.22 | 0.09  | 0.01 | 5.14E-12  |
| GSTP1  | rs762803    | 11 | 67584785  | A | C | 0.45 | 0.21  | 0.01 | 8.14E-69  |
| GUCA2A | rs142157365 | 1  | 42162920  | T | A | 0.00 | -2.11 | 0.08 | 2.20E-72  |
| GUCA2A | rs3044077   | 4  | 68491872  | T | T | 0.66 | -0.08 | 0.01 | 1.99E-11  |
| GUCA2A | rs6926755   | 6  | 81845964  | T | C | 0.49 | -0.09 | 0.01 | 4.58E-15  |
| GUCA2A | rs782819119 | 9  | 133270584 | A | T | 0.31 | 0.07  | 0.01 | 9.02E-08  |
| GUCA2A | rs2511241   | 11 | 73234296  | T | C | 0.93 | 0.11  | 0.01 | 8.70E-07  |
| GUCA2A | rs4982408   | 14 | 21102455  | C | A | 0.84 | 0.09  | 0.01 | 7.50E-09  |
| GUCA2A | rs9928757   | 16 | 20341541  | C | G | 0.20 | -0.06 | 0.01 | 1.62E-05  |
| GUCA2A | rs1424231   | 16 | 79672854  | C | T | 0.34 | 0.05  | 0.01 | 2.00E-05  |
| GUCA2A | rs17743980  | 17 | 9890522   | A | G | 0.32 | 0.06  | 0.01 | 3.39E-06  |
| GUSB   | -           | 2  | 61351466  | T | A | 0.15 | 0.07  | 0.01 | 8.63E-06  |
| GUSB   | rs645040    | 3  | 136207780 | T | G | 0.77 | 0.10  | 0.01 | 2.73E-15  |
| GUSB   | rs115850161 | 4  | 118811292 | C | T | 0.06 | 0.18  | 0.01 | 5.61E-15  |
| GUSB   | rs72814178  | 5  | 173059736 | G | A | 0.13 | 0.07  | 0.01 | 1.40E-05  |
| GUSB   | rs111331197 | 6  | 7883235   | T | C | 0.01 | -0.24 | 0.03 | 4.87E-06  |
| GUSB   | -           | 6  | 130065067 | G | A | 0.68 | 0.05  | 0.01 | 1.85E-05  |
| GUSB   | rs28538349  | 7  | 4032120   | A | G | 0.52 | -0.05 | 0.01 | 4.01E-06  |

|      |             |    |           |   |   |      |       |      |           |
|------|-------------|----|-----------|---|---|------|-------|------|-----------|
| GUSB | rs149606212 | 7  | 65979854  | T | C | 0.00 | -1.38 | 0.07 | 1.11E-33  |
| GUSB | rs11003134  | 10 | 52778399  | A | C | 0.14 | 0.07  | 0.01 | 2.44E-06  |
| GUSB | rs99780     | 11 | 61829161  | T | C | 0.35 | 0.08  | 0.01 | 2.29E-13  |
| GUSB | rs10778152  | 12 | 101831973 | G | A | 0.29 | -0.26 | 0.01 | 2.25E-105 |
| GUSB | rs150641790 | 13 | 41113708  | G | T | 0.07 | 0.09  | 0.01 | 6.78E-06  |
| GUSB | rs147233090 | 15 | 43735849  | T | C | 0.02 | 0.28  | 0.02 | 1.16E-15  |
| GUSB | rs1801690   | 17 | 66212167  | G | C | 0.06 | -0.28 | 0.01 | 1.72E-34  |
| GUSB | rs5826313   | 18 | 74290916  | A | C | 0.32 | 0.06  | 0.01 | 2.74E-08  |
| GUSB | rs2974755   | 19 | 12951849  | T | C | 0.60 | 0.05  | 0.01 | 9.62E-06  |
| GUSB | rs200210321 | 19 | 19283081  | G | A | 0.07 | 0.19  | 0.01 | 4.15E-21  |
| GYS1 | rs342299    | 7  | 106733272 | T | C | 0.46 | -0.05 | 0.01 | 2.06E-05  |
| GYS1 | rs3748136   | 8  | 9172650   | A | G | 0.21 | -0.31 | 0.01 | 1.02E-108 |
| GYS1 | rs11553699  | 12 | 121779004 | G | A | 0.14 | -0.08 | 0.01 | 1.34E-05  |
| GYS1 | rs112805222 | 16 | 47188773  | A | G | 0.05 | 0.13  | 0.02 | 4.51E-06  |
| GZMA | rs76036957  | 2  | 112738876 | A | G | 0.01 | 0.29  | 0.04 | 9.61E-07  |
| GZMA | rs13063578  | 3  | 47046347  | A | T | 0.40 | -0.07 | 0.01 | 4.62E-09  |
| GZMA | rs230507    | 4  | 102559089 | A | C | 0.65 | 0.06  | 0.01 | 2.32E-06  |
| GZMA | rs2047745   | 5  | 55193713  | C | T | 0.21 | 0.07  | 0.01 | 4.55E-07  |
| GZMA | -           | 5  | 100810354 | A | C | 0.62 | 0.05  | 0.01 | 2.12E-05  |
| GZMA | rs3846730   | 5  | 132471088 | T | C | 0.24 | -0.06 | 0.01 | 5.59E-06  |
| GZMA | rs9264645   | 6  | 31270747  | A | G | 0.64 | 0.27  | 0.01 | 2.14E-116 |
| GZMA | rs2347784   | 7  | 6485212   | G | C | 0.27 | -0.07 | 0.01 | 7.80E-09  |
| GZMA | rs6476398   | 9  | 33119243  | T | C | 0.31 | -0.09 | 0.01 | 6.84E-13  |
| GZMA | rs41280225  | 9  | 113261699 | C | A | 0.13 | -0.09 | 0.01 | 1.07E-07  |
| GZMA | rs8177652   | 10 | 5973421   | A | G | 0.32 | 0.06  | 0.01 | 5.28E-06  |
| GZMA | rs113430316 | 11 | 128246346 | A | T | 0.28 | -0.06 | 0.01 | 6.29E-06  |
| GZMA | rs75587749  | 12 | 7462344   | T | C | 0.09 | 0.09  | 0.01 | 6.11E-06  |
| GZMA | rs4764809   | 12 | 101702234 | T | A | 0.49 | 0.06  | 0.01 | 9.62E-08  |
| GZMA | rs3184504   | 12 | 111446804 | C | T | 0.52 | -0.12 | 0.01 | 6.42E-26  |
| GZMA | rs145078947 | 14 | 93186629  | T | G | 0.00 | 0.65  | 0.07 | 1.29E-09  |
| GZMA | rs10402422  | 19 | 16364577  | A | G | 0.69 | -0.06 | 0.01 | 3.55E-06  |
| GZMA | rs12986064  | 19 | 54251270  | C | T | 0.51 | -0.08 | 0.01 | 3.35E-11  |
| GZMB | rs2643902   | 1  | 2314000   | C | T | 0.79 | -0.07 | 0.01 | 1.24E-06  |
| GZMB | rs760805    | 1  | 24925432  | T | A | 0.57 | 0.06  | 0.01 | 1.48E-07  |
| GZMB | rs2725124   | 5  | 100810073 | A | C | 0.62 | 0.07  | 0.01 | 9.03E-10  |
| GZMB | rs41563615  | 6  | 31356598  | T | G | 0.05 | 0.42  | 0.02 | 3.40E-68  |
| GZMB | rs2497318   | 10 | 92672243  | T | C | 0.45 | 0.06  | 0.01 | 3.94E-08  |
| GZMB | rs756658243 | 11 | 128189307 | T | A | 0.29 | -0.09 | 0.01 | 6.41E-13  |
| GZMB | rs2460740   | 12 | 10428847  | G | T | 0.68 | -0.08 | 0.01 | 2.37E-12  |
| GZMB | rs7137828   | 12 | 111494996 | T | C | 0.52 | -0.06 | 0.01 | 2.69E-07  |
| GZMB | rs8192918   | 14 | 24632672  | T | C | 0.22 | -0.36 | 0.01 | 2.12E-165 |
| GZMB | rs12451746  | 17 | 35479844  | A | G | 0.43 | -0.13 | 0.01 | 1.18E-34  |
| GZMB | rs56133626  | 19 | 16331162  | A | G | 0.33 | -0.06 | 0.01 | 7.59E-08  |
| GZMB | rs35477491  | 21 | 13901496  | T | C | 0.22 | -0.07 | 0.01 | 1.99E-05  |
| GZMH | rs10798014  | 1  | 185425702 | G | A | 0.32 | 0.08  | 0.01 | 1.96E-12  |
| GZMH | rs3732378   | 3  | 39265671  | A | G | 0.17 | 0.06  | 0.01 | 1.82E-05  |
| GZMH | rs2844622   | 6  | 31272283  | G | A | 0.66 | 0.12  | 0.01 | 5.10E-26  |
| GZMH | rs2347784   | 7  | 6485212   | G | C | 0.27 | -0.07 | 0.01 | 3.01E-07  |
| GZMH | -           | 9  | 33149200  | T | A | 0.39 | -0.05 | 0.01 | 3.96E-06  |
| GZMH | -           | 9  | 136946019 | T | G | 0.52 | 0.05  | 0.01 | 6.95E-06  |
| GZMH | rs78325861  | 10 | 70618733  | G | C | 0.04 | 0.16  | 0.02 | 1.15E-08  |
| GZMH | rs576785    | 11 | 128183379 | C | T | 0.29 | -0.11 | 0.01 | 1.18E-18  |
| GZMH | rs2859660   | 12 | 10429695  | T | C | 0.84 | -0.09 | 0.01 | 9.65E-09  |
| GZMH | rs190749747 | 14 | 24607097  | G | C | 0.01 | -0.89 | 0.04 | 7.77E-59  |
| GZMH | rs56133626  | 19 | 16331162  | A | G | 0.33 | -0.06 | 0.01 | 5.16E-06  |
| HAGH | rs115389912 | 16 | 1819973   | A | G | 0.01 | -0.81 | 0.05 | 1.04E-26  |

|        |             |    |           |   |   |      |       |      |           |
|--------|-------------|----|-----------|---|---|------|-------|------|-----------|
| HAO1   | rs1497406   | 1  | 16178825  | G | A | 0.58 | 0.06  | 0.01 | 2.84E-08  |
| HAO1   | rs12904     | 1  | 155134221 | A | G | 0.41 | -0.06 | 0.01 | 4.18E-07  |
| HAO1   | rs7608141   | 2  | 296381    | C | A | 0.33 | 0.06  | 0.01 | 1.66E-06  |
| HAO1   | rs4835265   | 4  | 145900258 | A | C | 0.16 | 0.12  | 0.01 | 4.95E-15  |
| HAO1   | rs112875651 | 8  | 125494452 | A | G | 0.39 | -0.05 | 0.01 | 1.04E-05  |
| HAO1   | rs151068477 | 10 | 50882756  | T | G | 0.01 | 0.28  | 0.04 | 2.04E-05  |
| HAO1   | rs10883451  | 10 | 100164661 | C | T | 0.50 | -0.05 | 0.01 | 2.66E-05  |
| HAO1   | rs12373325  | 18 | 58420416  | C | T | 0.80 | -0.10 | 0.01 | 1.03E-12  |
| HAO1   | rs738409    | 22 | 43928847  | G | C | 0.22 | 0.06  | 0.01 | 2.65E-06  |
| HARS1  | rs1354034   | 3  | 56815721  | C | T | 0.60 | 0.07  | 0.01 | 5.68E-10  |
| HARS1  | rs342296    | 7  | 106732457 | A | G | 0.46 | -0.05 | 0.01 | 7.77E-06  |
| HARS1  | rs60822569  | 12 | 54323724  | C | T | 0.55 | 0.05  | 0.01 | 1.11E-05  |
| HAVCR1 | -           | 1  | 43259622  | C | A | 0.43 | 0.07  | 0.01 | 2.19E-12  |
| HAVCR1 | rs2070803   | 1  | 155185239 | G | A | 0.43 | 0.05  | 0.01 | 2.55E-07  |
| HAVCR1 | rs56139727  | 5  | 697265    | T | G | 0.70 | -0.06 | 0.01 | 2.19E-06  |
| HAVCR1 | rs6878069   | 5  | 157044058 | G | A | 0.48 | -0.48 | 0.01 | 0.00E+00  |
| HAVCR1 | rs3117182   | 6  | 32099042  | A | T | 0.85 | 0.05  | 0.01 | 2.76E-05  |
| HAVCR1 | rs112875651 | 8  | 125494452 | A | G | 0.39 | -0.06 | 0.01 | 1.71E-10  |
| HAVCR1 | rs2070895   | 15 | 58431740  | A | G | 0.22 | 0.08  | 0.01 | 5.05E-12  |
| HAVCR1 | rs77924615  | 16 | 20381010  | A | G | 0.20 | -0.12 | 0.01 | 2.55E-24  |
| HAVCR1 | rs112001035 | 17 | 68827664  | A | G | 0.06 | 0.22  | 0.01 | 7.19E-30  |
| HAVCR2 | rs61747728  | 1  | 179557079 | T | C | 0.04 | 0.16  | 0.02 | 4.08E-08  |
| HAVCR2 | rs7569939   | 2  | 62278920  | G | A | 0.52 | -0.06 | 0.01 | 3.15E-08  |
| HAVCR2 | rs7630058   | 3  | 98618673  | T | C | 0.22 | -0.08 | 0.01 | 2.78E-09  |
| HAVCR2 | rs116363290 | 5  | 157109126 | T | C | 0.01 | -1.72 | 0.05 | 2.58E-108 |
| HAVCR2 | rs509227    | 6  | 10535358  | C | A | 0.52 | 0.05  | 0.01 | 1.25E-06  |
| HAVCR2 | rs950802    | 11 | 60385111  | A | G | 0.31 | 0.11  | 0.01 | 1.18E-21  |
| HAVCR2 | rs77924615  | 16 | 20381010  | A | G | 0.20 | -0.07 | 0.01 | 4.31E-06  |
| HAVCR2 | rs186021206 | 17 | 7166093   | A | G | 0.01 | 0.48  | 0.05 | 2.91E-10  |
| HBEGF  | rs3811444   | 1  | 247876149 | T | C | 0.33 | -0.06 | 0.01 | 2.76E-07  |
| HBEGF  | rs78909033  | 2  | 240571486 | A | G | 0.14 | -0.08 | 0.01 | 4.41E-07  |
| HBEGF  | rs2079797   | 3  | 47300311  | A | G | 0.45 | 0.06  | 0.01 | 3.59E-06  |
| HBEGF  | rs1354034   | 3  | 56815721  | C | T | 0.60 | -0.16 | 0.01 | 7.47E-43  |
| HBEGF  | rs10016018  | 4  | 101873464 | T | A | 0.40 | -0.05 | 0.01 | 2.42E-05  |
| HBEGF  | rs274555    | 5  | 132387259 | T | C | 0.40 | 0.05  | 0.01 | 8.44E-06  |
| HBEGF  | rs4098923   | 6  | 31225979  | G | A | 0.45 | -0.06 | 0.01 | 6.96E-08  |
| HBEGF  | rs62396356  | 6  | 41200025  | G | A | 0.13 | 0.09  | 0.01 | 2.44E-07  |
| HBEGF  | rs6961069   | 7  | 80589645  | T | C | 0.40 | 0.05  | 0.01 | 2.81E-05  |
| HBEGF  | rs342299    | 7  | 106733272 | T | C | 0.46 | -0.05 | 0.01 | 4.61E-06  |
| HBEGF  | rs447124    | 9  | 4746539   | T | C | 0.49 | 0.06  | 0.01 | 1.25E-06  |
| HBEGF  | rs10820606  | 9  | 96430637  | C | A | 0.23 | -0.11 | 0.01 | 3.91E-17  |
| HBEGF  | rs467369    | 9  | 134040643 | T | C | 0.53 | 0.06  | 0.01 | 2.04E-08  |
| HBEGF  | rs10761737  | 10 | 63292445  | C | T | 0.41 | 0.17  | 0.01 | 2.46E-52  |
| HBEGF  | rs80137017  | 10 | 69477626  | T | C | 0.13 | 0.08  | 0.01 | 3.44E-06  |
| HBEGF  | rs71474568  | 10 | 102589091 | G | T | 0.34 | 0.06  | 0.01 | 1.65E-06  |
| HBEGF  | rs489298    | 12 | 3129999   | T | C | 0.40 | -0.05 | 0.01 | 1.40E-05  |
| HBEGF  | rs4608137   | 12 | 6184207   | A | G | 0.49 | -0.05 | 0.01 | 2.19E-05  |
| HBEGF  | rs1716505   | 12 | 64611299  | G | C | 0.32 | 0.05  | 0.01 | 1.21E-05  |
| HBEGF  | rs11553699  | 12 | 121779004 | G | A | 0.14 | 0.16  | 0.01 | 9.58E-22  |
| HBEGF  | rs12445050  | 16 | 81837364  | T | C | 0.14 | 0.08  | 0.01 | 3.93E-06  |
| HBEGF  | rs516051    | 17 | 29555687  | C | A | 0.52 | -0.07 | 0.01 | 1.10E-09  |
| HBEGF  | rs58635160  | 19 | 8454684   | C | T | 0.50 | -0.06 | 0.01 | 2.12E-06  |
| HBEGF  | rs1654425   | 19 | 55027612  | C | T | 0.83 | 0.15  | 0.01 | 2.56E-23  |
| HBEGF  | rs3790176   | 20 | 19281278  | A | G | 0.34 | 0.06  | 0.01 | 1.36E-06  |
| HBEGF  | rs116905185 | 20 | 50604766  | C | T | 0.01 | 0.30  | 0.04 | 5.70E-08  |
| HBQ1   | rs11759553  | 6  | 135101158 | T | A | 0.27 | -0.05 | 0.01 | 2.63E-05  |

|         |             |    |           |   |   |      |       |      |           |
|---------|-------------|----|-----------|---|---|------|-------|------|-----------|
| HBQ1    | rs3760047   | 16 | 231300    | A | G | 0.81 | 0.47  | 0.01 | 2.71E-242 |
| HBQ1    | -           | 16 | 72045090  | T | G | 0.18 | 0.09  | 0.01 | 4.39E-10  |
| HCLS1   | rs1354034   | 3  | 56815721  | C | T | 0.60 | 0.05  | 0.01 | 1.76E-05  |
| HCLS1   | rs3732410   | 3  | 121696873 | C | T | 0.23 | 0.09  | 0.01 | 3.83E-12  |
| HCLS1   | rs4759076   | 12 | 54336088  | C | T | 0.46 | 0.05  | 0.01 | 3.99E-06  |
| HCLS1   | rs10418046  | 19 | 53824615  | G | T | 0.21 | 0.11  | 0.01 | 1.28E-15  |
| HDGF    | rs3806417   | 1  | 156741831 | A | C | 0.33 | 1.14  | 0.01 | 0.00E+00  |
| HDGF    | rs6993770   | 8  | 105569300 | T | A | 0.29 | -0.05 | 0.01 | 3.92E-10  |
| HEBP1   | rs1941      | 12 | 12975329  | G | C | 0.04 | -0.32 | 0.02 | 9.77E-26  |
| HEXIM1  | rs1354034   | 3  | 56815721  | C | T | 0.60 | 0.13  | 0.01 | 3.24E-32  |
| HEXIM1  | rs114694170 | 5  | 88884379  | C | T | 0.06 | 0.12  | 0.02 | 1.05E-06  |
| HEXIM1  | rs7080386   | 10 | 63288546  | A | C | 0.41 | 0.06  | 0.01 | 6.31E-07  |
| HEXIM1  | rs11502185  | 11 | 180258    | C | T | 0.26 | 0.08  | 0.01 | 1.69E-08  |
| HEXIM1  | rs60822569  | 12 | 54323724  | C | T | 0.55 | 0.06  | 0.01 | 7.39E-08  |
| HEXIM1  | -           | 17 | 45145418  | G | T | 0.48 | 0.07  | 0.01 | 1.07E-08  |
| HEXIM1  | rs1671152   | 19 | 55014977  | G | T | 0.84 | 0.07  | 0.01 | 2.50E-05  |
| HGF     | rs59950280  | 4  | 3450618   | A | G | 0.33 | 0.14  | 0.01 | 3.56E-31  |
| HGF     | rs5745687   | 7  | 81729735  | T | C | 0.07 | -0.19 | 0.01 | 5.93E-17  |
| HGF     | -           | 8  | 105561296 | C | A | 0.27 | -0.06 | 0.01 | 7.05E-07  |
| HGF     | rs2511241   | 11 | 73234296  | T | C | 0.93 | 0.16  | 0.01 | 6.21E-13  |
| HGF     | rs7310615   | 12 | 111427245 | G | C | 0.52 | -0.06 | 0.01 | 3.20E-07  |
| HGF     | rs704       | 17 | 28367840  | A | G | 0.47 | -0.06 | 0.01 | 2.17E-07  |
| HGS     | rs3811444   | 1  | 247876149 | T | C | 0.33 | -0.06 | 0.01 | 2.04E-07  |
| HGS     | rs1354034   | 3  | 56815721  | C | T | 0.60 | 0.06  | 0.01 | 8.79E-07  |
| HGS     | rs342293    | 7  | 106731773 | G | C | 0.46 | -0.05 | 0.01 | 5.10E-06  |
| HGS     | rs6993770   | 8  | 105569300 | T | A | 0.29 | -0.06 | 0.01 | 2.56E-05  |
| HGS     | -           | 10 | 63156270  | A | T | 0.49 | 0.05  | 0.01 | 1.28E-05  |
| HLA-DRA | rs36096565  | 6  | 32592248  | G | A | 0.21 | 0.68  | 0.01 | 0.00E+00  |
| HLA-DRA | rs76904798  | 12 | 40220632  | T | C | 0.14 | 0.09  | 0.01 | 4.21E-10  |
| HLA-DRA | rs3184504   | 12 | 111446804 | C | T | 0.52 | -0.06 | 0.01 | 6.01E-10  |
| HLA-E   | rs2927608   | 5  | 96916728  | A | G | 0.45 | -0.19 | 0.01 | 3.76E-69  |
| HLA-E   | rs2523594   | 6  | 31358852  | T | C | 0.62 | -0.32 | 0.01 | 1.65E-174 |
| HLA-E   | rs7137828   | 12 | 111494996 | T | C | 0.52 | -0.09 | 0.01 | 5.32E-19  |
| HLA-E   | rs74439742  | 16 | 57025515  | T | C | 0.17 | -0.09 | 0.01 | 3.16E-11  |
| HMBS    | rs72997349  | 11 | 119074792 | C | T | 0.03 | 0.38  | 0.02 | 7.79E-33  |
| HMBS    | -           | 22 | 21586875  | C | T | 0.19 | -0.07 | 0.01 | 1.15E-06  |
| HMOX1   | rs371562288 | 1  | 62553032  | C | T | 0.63 | 0.05  | 0.01 | 1.32E-05  |
| HMOX1   | rs385076    | 2  | 32264782  | C | T | 0.64 | 0.17  | 0.01 | 1.40E-48  |
| HMOX1   | rs6786207   | 3  | 69789164  | T | G | 0.65 | -0.08 | 0.01 | 9.81E-11  |
| HMOX1   | rs17229943  | 5  | 69386709  | C | A | 0.05 | 0.17  | 0.02 | 7.85E-11  |
| HMOX1   | rs13167071  | 5  | 156946626 | C | G | 0.64 | -0.06 | 0.01 | 6.36E-07  |
| HMOX1   | rs2032444   | 6  | 26046516  | G | T | 0.35 | 0.06  | 0.01 | 4.58E-07  |
| HMOX1   | rs2637678   | 6  | 116466215 | C | T | 0.41 | 0.07  | 0.01 | 2.88E-10  |
| HMOX1   | rs11379524  | 9  | 93120463  | C | A | 0.63 | 0.05  | 0.01 | 2.65E-05  |
| HMOX1   | rs17476364  | 10 | 69334748  | C | T | 0.11 | 0.08  | 0.01 | 9.30E-06  |
| HMOX1   | rs7080536   | 10 | 113588287 | A | G | 0.04 | 0.35  | 0.02 | 1.70E-37  |
| HMOX1   | rs10846744  | 12 | 124827879 | C | G | 0.14 | 0.09  | 0.01 | 3.81E-08  |
| HMOX1   | rs261290    | 15 | 58386521  | C | T | 0.65 | -0.06 | 0.01 | 1.47E-07  |
| HMOX1   | rs12149545  | 16 | 56959249  | A | G | 0.32 | 0.07  | 0.01 | 5.17E-08  |
| HMOX1   | rs34931250  | 17 | 68883786  | T | C | 0.06 | 0.12  | 0.02 | 3.78E-07  |
| HMOX1   | rs1065853   | 19 | 44909976  | T | G | 0.08 | 0.19  | 0.01 | 2.06E-20  |
| HMOX1   | rs34632751  | 19 | 48211939  | C | T | 0.03 | 0.32  | 0.02 | 8.86E-21  |
| HMOX1   | rs117280289 | 20 | 26252163  | T | C | 0.05 | -0.13 | 0.02 | 2.42E-07  |
| HMOX1   | rs113460913 | 20 | 31534093  | A | T | 0.15 | -0.19 | 0.01 | 1.68E-36  |
| HMOX1   | rs2071747   | 22 | 35381192  | C | G | 0.06 | -0.15 | 0.02 | 1.68E-10  |
| HMOX1   | rs738409    | 22 | 43928847  | G | C | 0.22 | 0.06  | 0.01 | 2.28E-05  |

|          |             |    |           |   |   |      |       |      |           |
|----------|-------------|----|-----------|---|---|------|-------|------|-----------|
| HMOX2    | rs4835265   | 4  | 145900258 | A | C | 0.16 | 0.10  | 0.01 | 3.28E-10  |
| HMOX2    | rs3747584   | 16 | 4466091   | C | T | 0.74 | -0.12 | 0.01 | 5.49E-20  |
| HMOX2    | rs4503880   | 18 | 58416822  | C | T | 0.80 | -0.09 | 0.01 | 3.45E-09  |
| HMOX2    | rs429358    | 19 | 44908684  | C | T | 0.16 | 0.10  | 0.01 | 3.15E-10  |
| HNMT     | rs11558538  | 2  | 138002079 | T | C | 0.11 | -1.11 | 0.01 | 0.00E+00  |
| HNMT     | rs7032525   | 9  | 93120619  | C | T | 0.20 | -0.06 | 0.01 | 1.11E-06  |
| HNMT     | rs10418046  | 19 | 53824615  | G | T | 0.21 | 0.06  | 0.01 | 2.58E-07  |
| HNMT     | rs738409    | 22 | 43928847  | G | C | 0.22 | 0.07  | 0.01 | 3.70E-08  |
| HNRNPK   | rs6993770   | 8  | 105569300 | T | A | 0.29 | -0.06 | 0.01 | 5.60E-07  |
| HPCAL1   | rs375285744 | 2  | 10336102  | C | T | 0.15 | 0.22  | 0.01 | 4.08E-42  |
| HPGDS    | rs763228358 | 1  | 196666644 | A | G | 0.25 | -0.06 | 0.01 | 3.11E-06  |
| HPGDS    | rs2865353   | 4  | 94349727  | C | T | 0.61 | 0.46  | 0.01 | 0.00E+00  |
| HPGDS    | rs2398827   | 9  | 93144825  | C | T | 0.60 | 0.07  | 0.01 | 4.40E-09  |
| HS3ST3B1 | rs4970836   | 1  | 109279175 | A | G | 0.77 | 0.07  | 0.01 | 2.12E-08  |
| HS3ST3B1 | rs4846914   | 1  | 230159944 | A | G | 0.61 | 0.14  | 0.01 | 4.13E-37  |
| HS3ST3B1 | rs11096641  | 2  | 20174397  | A | G | 0.47 | -0.05 | 0.01 | 8.86E-07  |
| HS3ST3B1 | rs5030062   | 3  | 186736391 | C | A | 0.37 | -0.06 | 0.01 | 2.62E-07  |
| HS3ST3B1 | rs13107325  | 4  | 102267552 | T | C | 0.08 | -0.11 | 0.01 | 1.33E-07  |
| HS3ST3B1 | rs3836616   | 4  | 186233118 | A | T | 0.51 | -0.09 | 0.01 | 6.82E-17  |
| HS3ST3B1 | rs1801020   | 5  | 177409531 | G | A | 0.75 | -0.06 | 0.01 | 4.43E-07  |
| HS3ST3B1 | rs28929474  | 14 | 94378610  | T | C | 0.02 | 0.23  | 0.02 | 2.39E-09  |
| HS3ST3B1 | rs9302635   | 16 | 72110275  | C | T | 0.18 | 0.07  | 0.01 | 5.08E-07  |
| HS3ST3B1 | rs17669311  | 17 | 13933734  | A | G | 0.39 | 0.33  | 0.01 | 1.78E-174 |
| HS6ST1   | rs12740374  | 1  | 109274968 | T | G | 0.22 | -0.07 | 0.01 | 3.21E-08  |
| HS6ST1   | rs907866    | 2  | 20171619  | A | G | 0.45 | -0.07 | 0.01 | 1.32E-10  |
| HS6ST1   | rs6761320   | 2  | 128292780 | T | C | 0.43 | -0.21 | 0.01 | 3.42E-76  |
| HS6ST1   | rs17282078  | 3  | 124762913 | A | T | 0.13 | -0.10 | 0.01 | 7.69E-09  |
| HS6ST1   | rs13107325  | 4  | 102267552 | T | C | 0.08 | 0.17  | 0.01 | 4.44E-15  |
| HS6ST1   | rs1290147   | 5  | 150540177 | C | G | 0.65 | -0.05 | 0.01 | 2.37E-05  |
| HS6ST1   | rs573098    | 6  | 31874113  | T | A | 0.67 | 0.07  | 0.01 | 4.80E-08  |
| HS6ST1   | rs71556736  | 7  | 73620599  | T | C | 0.13 | -0.08 | 0.01 | 4.64E-06  |
| HS6ST1   | rs6952090   | 7  | 130282658 | C | T | 0.35 | -0.06 | 0.01 | 3.92E-07  |
| HS6ST1   | rs56278466  | 10 | 17833858  | G | T | 0.66 | 0.07  | 0.01 | 2.61E-08  |
| HS6ST1   | rs1149596   | 11 | 76758049  | T | C | 0.17 | -0.08 | 0.01 | 2.51E-07  |
| HS6ST1   | rs770578737 | 11 | 117146838 | G | A | 0.79 | -0.06 | 0.01 | 1.07E-05  |
| HS6ST1   | rs35350651  | 12 | 111469627 | C | A | 0.50 | -0.05 | 0.01 | 3.83E-06  |
| HS6ST1   | rs12903915  | 15 | 50736551  | C | T | 0.34 | -0.06 | 0.01 | 1.94E-07  |
| HS6ST1   | rs72802342  | 16 | 75200974  | A | C | 0.08 | -0.19 | 0.01 | 1.62E-19  |
| HS6ST1   | rs704       | 17 | 28367840  | A | G | 0.47 | -0.15 | 0.01 | 1.50E-42  |
| HS6ST1   | rs77542162  | 17 | 69085137  | G | A | 0.02 | 0.29  | 0.02 | 2.94E-15  |
| HSD11B1  | rs78444298  | 1  | 184702964 | A | G | 0.02 | 0.25  | 0.03 | 2.77E-09  |
| HSD11B1  | rs7542235   | 1  | 196854483 | G | A | 0.19 | 0.16  | 0.01 | 5.37E-28  |
| HSD11B1  | rs4240624   | 8  | 9326721   | A | G | 0.91 | 0.17  | 0.01 | 1.67E-18  |
| HSD11B1  | rs174547    | 11 | 61803311  | C | T | 0.34 | 0.07  | 0.01 | 9.21E-10  |
| HSD11B1  | rs695110    | 11 | 75745536  | C | T | 0.15 | 0.08  | 0.01 | 1.12E-06  |
| HSD11B1  | rs1076485   | 11 | 116901725 | T | C | 0.12 | 0.11  | 0.01 | 4.37E-10  |
| HSD11B1  | rs28929474  | 14 | 94378610  | T | C | 0.02 | 0.65  | 0.03 | 3.56E-60  |
| HSD11B1  | rs56156922  | 16 | 56953457  | C | T | 0.33 | 0.05  | 0.01 | 2.68E-05  |
| HSD11B1  | rs2532351   | 17 | 46259631  | G | C | 0.42 | 0.05  | 0.01 | 6.30E-06  |
| HSD11B1  | rs1801689   | 17 | 66214462  | C | A | 0.03 | 0.44  | 0.02 | 6.68E-40  |
| HSD11B1  | rs58542926  | 19 | 19268740  | T | C | 0.08 | 0.22  | 0.01 | 2.18E-25  |
| HSD11B1  | rs141887102 | 19 | 58565664  | C | A | 0.18 | 0.09  | 0.01 | 5.48E-09  |
| HSPA1A   | rs181412562 | 6  | 31849800  | T | C | 0.00 | -1.28 | 0.09 | 3.49E-21  |
| HSPA1A   | rs342293    | 7  | 106731773 | G | C | 0.46 | -0.06 | 0.01 | 1.73E-06  |
| HSPA1A   | rs11218968  | 11 | 123087770 | G | A | 0.04 | -0.14 | 0.02 | 7.00E-07  |
| HSPB1    | rs1354034   | 3  | 56815721  | C | T | 0.60 | 0.05  | 0.01 | 2.57E-06  |

|       |             |    |           |   |   |      |       |      |           |
|-------|-------------|----|-----------|---|---|------|-------|------|-----------|
| HSPB1 | rs6926219   | 6  | 122399661 | A | G | 0.55 | -0.09 | 0.01 | 1.66E-16  |
| HSPB1 | rs111642997 | 7  | 76290678  | A | C | 0.24 | -0.55 | 0.01 | 0.00E+00  |
| HSPB1 | rs342298    | 7  | 106733200 | T | C | 0.46 | -0.08 | 0.01 | 9.99E-11  |
| HSPB1 | rs7896518   | 10 | 63344740  | G | A | 0.42 | 0.08  | 0.01 | 1.76E-11  |
| HSPB1 | rs11553699  | 12 | 121779004 | G | A | 0.14 | -0.08 | 0.01 | 2.68E-06  |
| HSPB6 | rs12463674  | 2  | 178567458 | G | A | 0.32 | 0.05  | 0.01 | 1.35E-06  |
| HSPB6 | rs12331051  | 4  | 186218653 | T | C | 0.43 | 0.06  | 0.01 | 5.62E-08  |
| HSPB6 | rs151828    | 5  | 96724558  | C | T | 0.55 | 0.05  | 0.01 | 9.12E-07  |
| HSPB6 | -           | 6  | 28200548  | A | C | 0.23 | 0.06  | 0.01 | 3.17E-07  |
| HSPB6 | rs2234962   | 10 | 119670121 | C | T | 0.22 | 0.06  | 0.01 | 5.39E-06  |
| HSPB6 | -           | 11 | 22178894  | C | G | 0.53 | 0.06  | 0.01 | 4.41E-10  |
| HSPB6 | rs1337298   | 13 | 73556538  | T | C | 0.44 | -0.05 | 0.01 | 1.08E-06  |
| HSPG2 | rs6684152   | 1  | 21821271  | G | A | 0.29 | -0.17 | 0.01 | 5.03E-45  |
| HSPG2 | rs1398018   | 4  | 76451770  | C | T | 0.44 | 0.05  | 0.01 | 9.16E-06  |
| HSPG2 | rs10480747  | 7  | 121240519 | C | A | 0.35 | -0.05 | 0.01 | 2.49E-05  |
| HSPG2 | rs77924615  | 16 | 20381010  | A | G | 0.20 | -0.08 | 0.01 | 1.23E-08  |
| HTRA2 | rs6993770   | 8  | 105569300 | T | A | 0.29 | -0.06 | 0.01 | 9.95E-06  |
| HYAL1 | rs11801243  | 1  | 180158216 | A | G | 0.06 | -0.10 | 0.02 | 1.72E-05  |
| HYAL1 | rs116482870 | 3  | 50302191  | T | C | 0.06 | -0.54 | 0.02 | 1.62E-119 |
| HYAL1 | rs12321232  | 12 | 9163072   | T | G | 0.23 | -0.06 | 0.01 | 6.39E-06  |
| HYAL1 | rs142650905 | 12 | 57208108  | T | C | 0.00 | -1.53 | 0.10 | 2.04E-25  |
| HYOU1 | rs7532110   | 1  | 47496292  | A | T | 0.80 | 0.09  | 0.01 | 1.37E-09  |
| HYOU1 | rs61747728  | 1  | 179557079 | T | C | 0.04 | 0.23  | 0.02 | 1.06E-14  |
| HYOU1 | rs59484402  | 1  | 230167092 | T | C | 0.61 | -0.05 | 0.01 | 2.75E-05  |
| HYOU1 | rs75166367  | 2  | 162107791 | A | G | 0.06 | -0.13 | 0.02 | 2.50E-08  |
| HYOU1 | rs149547076 | 3  | 57571717  | C | T | 0.01 | -0.33 | 0.04 | 2.33E-09  |
| HYOU1 | rs74676624  | 7  | 127459985 | C | T | 0.07 | -0.10 | 0.01 | 6.97E-06  |
| HYOU1 | rs2509121   | 11 | 119057542 | T | C | 0.40 | 0.18  | 0.01 | 9.39E-58  |
| HYOU1 | rs28929474  | 14 | 94378610  | T | C | 0.02 | 0.30  | 0.03 | 4.16E-14  |
| HYOU1 | rs4965806   | 15 | 101212230 | A | G | 0.39 | 0.05  | 0.01 | 2.95E-06  |
| HYOU1 | rs777834943 | 16 | 20355409  | T | C | 0.18 | -0.06 | 0.01 | 1.72E-05  |
| HYOU1 | rs1801689   | 17 | 66214462  | C | A | 0.03 | 0.29  | 0.02 | 2.65E-18  |
| HYOU1 | rs2659005   | 17 | 81244914  | T | C | 0.44 | 0.08  | 0.01 | 1.64E-13  |
| HYOU1 | rs33950747  | 19 | 35848345  | T | C | 0.08 | 0.11  | 0.01 | 1.02E-07  |
| HYOU1 | rs10419198  | 19 | 49534760  | T | C | 0.25 | 0.06  | 0.01 | 6.17E-06  |
| HYOU1 | rs136205    | 22 | 36358158  | G | C | 0.75 | -0.06 | 0.01 | 9.10E-06  |
| ICA1  | rs1354034   | 3  | 56815721  | C | T | 0.60 | 0.05  | 0.01 | 1.20E-05  |
| ICA1  | rs60822569  | 12 | 54323724  | C | T | 0.55 | 0.05  | 0.01 | 2.46E-05  |
| ICA1  | rs3952      | 22 | 38060591  | G | A | 0.31 | -0.22 | 0.01 | 5.68E-72  |
| ICAM1 | -           | 9  | 133263362 | G | A | 0.18 | -0.27 | 0.01 | 3.82E-90  |
| ICAM1 | rs1049728   | 11 | 65653646  | C | G | 0.06 | -0.17 | 0.01 | 1.74E-14  |
| ICAM1 | rs34434834  | 11 | 126437901 | A | G | 0.03 | 0.15  | 0.02 | 1.04E-06  |
| ICAM1 | rs7137828   | 12 | 111494996 | T | C | 0.52 | -0.08 | 0.01 | 6.07E-15  |
| ICAM1 | rs186021206 | 17 | 7166093   | A | G | 0.01 | 0.63  | 0.05 | 1.98E-18  |
| ICAM1 | rs5030377   | 19 | 10282558  | G | A | 0.38 | 0.41  | 0.01 | 6.83E-283 |
| ICAM1 | rs3136642   | 19 | 38907776  | G | A | 0.37 | -0.06 | 0.01 | 1.35E-06  |
| ICAM2 | -           | 1  | 43812246  | G | A | 0.29 | 0.06  | 0.01 | 6.70E-09  |
| ICAM2 | rs11682865  | 2  | 62390661  | C | G | 0.19 | -0.05 | 0.01 | 1.92E-05  |
| ICAM2 | rs10935473  | 3  | 98698056  | T | G | 0.44 | -0.71 | 0.01 | 0.00E+00  |
| ICAM2 | rs9399137   | 6  | 135097880 | C | T | 0.26 | 0.06  | 0.01 | 1.01E-08  |
| ICAM2 | rs6993770   | 8  | 105569300 | T | A | 0.29 | -0.06 | 0.01 | 2.16E-10  |
| ICAM2 | rs2519093   | 9  | 133266456 | T | C | 0.18 | -0.85 | 0.01 | 0.00E+00  |
| ICAM2 | rs78689694  | 11 | 126364925 | C | G | 0.13 | -0.08 | 0.01 | 3.15E-11  |
| ICAM2 | rs111626763 | 12 | 26681871  | C | T | 0.59 | 0.04  | 0.01 | 3.82E-06  |
| ICAM2 | rs111338191 | 12 | 111388673 | T | A | 0.52 | -0.08 | 0.01 | 2.74E-20  |
| ICAM2 | rs186021206 | 17 | 7166093   | A | G | 0.01 | 1.25  | 0.04 | 1.68E-102 |



|        |             |    |           |   |   |      |       |      |           |
|--------|-------------|----|-----------|---|---|------|-------|------|-----------|
| ICAM2  | rs574698129 | 17 | 64022514  | C | A | 0.19 | 0.10  | 0.01 | 1.42E-18  |
| ICAM2  | rs368565    | 19 | 48697960  | T | C | 0.43 | -0.04 | 0.01 | 1.42E-06  |
| ICAM2  | rs2837989   | 21 | 41248192  | A | C | 0.19 | 0.05  | 0.01 | 8.79E-07  |
| ICAM3  | rs188468174 | 1  | 24965206  | T | C | 0.01 | -0.35 | 0.03 | 3.04E-14  |
| ICAM3  | rs778683816 | 1  | 43812878  | C | T | 0.35 | 0.05  | 0.01 | 8.06E-06  |
| ICAM3  | rs2289235   | 2  | 230873453 | A | G | 0.47 | -0.15 | 0.01 | 2.11E-43  |
| ICAM3  | rs6764279   | 3  | 187006187 | A | C | 0.28 | -0.09 | 0.01 | 7.14E-13  |
| ICAM3  | rs13135092  | 4  | 102276925 | G | A | 0.08 | 0.09  | 0.01 | 2.17E-05  |
| ICAM3  | rs1049709   | 6  | 31269077  | C | T | 0.17 | -0.19 | 0.01 | 3.17E-40  |
| ICAM3  | rs195075    | 6  | 119332122 | C | T | 0.26 | 0.06  | 0.01 | 5.83E-06  |
| ICAM3  | rs7758383   | 6  | 142848586 | G | A | 0.49 | 0.08  | 0.01 | 1.37E-13  |
| ICAM3  | rs2278467   | 8  | 24331331  | C | T | 0.16 | -0.21 | 0.01 | 2.60E-46  |
| ICAM3  | rs12574844  | 11 | 126403491 | A | G | 0.07 | -0.15 | 0.01 | 3.17E-13  |
| ICAM3  | rs3184504   | 12 | 111446804 | C | T | 0.52 | -0.14 | 0.01 | 6.28E-38  |
| ICAM3  | rs494632    | 12 | 120751313 | T | C | 0.47 | -0.06 | 0.01 | 5.57E-08  |
| ICAM3  | rs76428106  | 13 | 28029870  | C | T | 0.01 | 0.30  | 0.03 | 3.70E-09  |
| ICAM3  | rs9316367   | 13 | 48236653  | T | C | 0.25 | -0.11 | 0.01 | 1.06E-19  |
| ICAM3  | rs186021206 | 17 | 7166093   | A | G | 0.01 | 1.18  | 0.05 | 6.42E-58  |
| ICAM3  | rs34562254  | 17 | 16939677  | A | G | 0.10 | 0.09  | 0.01 | 4.80E-06  |
| ICAM3  | rs2305482   | 17 | 39984674  | C | A | 0.54 | -0.06 | 0.01 | 3.55E-09  |
| ICAM3  | -           | 17 | 46185215  | C | A | 0.17 | -0.07 | 0.01 | 1.20E-05  |
| ICAM3  | rs56378716  | 17 | 58279141  | G | A | 0.01 | 0.30  | 0.03 | 2.34E-10  |
| ICAM3  | rs2725405   | 17 | 81246424  | C | G | 0.44 | 0.10  | 0.01 | 3.29E-19  |
| ICAM3  | rs28378712  | 19 | 10346796  | G | T | 0.31 | 0.32  | 0.01 | 5.35E-158 |
| ICAM3  | rs602662    | 19 | 48703728  | A | G | 0.54 | 0.05  | 0.01 | 3.38E-06  |
| ICAM3  | rs6517655   | 21 | 41164319  | C | G | 0.27 | 0.07  | 0.01 | 1.13E-07  |
| ICAM4  | rs139898146 | 1  | 25274256  | A | C | 0.42 | -0.68 | 0.01 | 0.00E+00  |
| ICAM4  | rs11576522  | 1  | 207615924 | G | A | 0.66 | 0.08  | 0.01 | 1.46E-10  |
| ICAM4  | rs7606173   | 2  | 60498316  | C | G | 0.43 | -0.06 | 0.01 | 4.36E-10  |
| ICAM4  | rs11731918  | 4  | 144133421 | T | A | 0.45 | 0.22  | 0.01 | 2.20E-108 |
| ICAM4  | rs2523990   | 6  | 30109452  | G | A | 0.54 | -0.05 | 0.01 | 8.37E-08  |
| ICAM4  | rs62427982  | 6  | 107115962 | T | C | 0.33 | 0.06  | 0.01 | 1.79E-07  |
| ICAM4  | rs9376091   | 6  | 135098498 | T | C | 0.26 | -0.09 | 0.01 | 6.58E-17  |
| ICAM4  | rs6592965   | 7  | 50360284  | A | G | 0.45 | -0.05 | 0.01 | 3.50E-08  |
| ICAM4  | -           | 9  | 133263362 | G | A | 0.18 | -0.32 | 0.01 | 3.44E-145 |
| ICAM4  | rs35141569  | 10 | 79040331  | T | G | 0.24 | 0.05  | 0.01 | 1.16E-05  |
| ICAM4  | rs11627485  | 14 | 65020976  | C | T | 0.45 | 0.05  | 0.01 | 1.37E-06  |
| ICAM4  | rs17580     | 14 | 94380925  | A | T | 0.05 | 0.16  | 0.01 | 7.62E-13  |
| ICAM4  | rs186021206 | 17 | 7166093   | A | G | 0.01 | 0.53  | 0.04 | 2.96E-15  |
| ICAM4  | -           | 17 | 46105617  | G | A | 0.17 | 0.06  | 0.01 | 1.19E-05  |
| ICAM4  | rs73425119  | 18 | 46173865  | C | G | 0.26 | 0.07  | 0.01 | 2.20E-11  |
| ICAM4  | rs5030377   | 19 | 10282558  | G | A | 0.38 | -0.11 | 0.01 | 2.03E-29  |
| ICAM4  | rs746064    | 21 | 41209521  | A | G | 0.38 | 0.09  | 0.01 | 2.76E-21  |
| ICAM5  | rs3864106   | 3  | 186938813 | C | G | 0.58 | -0.05 | 0.01 | 1.51E-06  |
| ICAM5  | -           | 4  | 55570661  | T | A | 0.36 | 0.05  | 0.01 | 3.47E-08  |
| ICAM5  | -           | 6  | 29887544  | G | C | 0.01 | 0.22  | 0.03 | 8.60E-06  |
| ICAM5  | rs2049865   | 8  | 115576319 | A | C | 0.58 | 0.05  | 0.01 | 5.78E-07  |
| ICAM5  | rs2519093   | 9  | 133266456 | T | C | 0.18 | -0.41 | 0.01 | 7.37E-253 |
| ICAM5  | rs75384243  | 11 | 126369257 | T | G | 0.09 | 0.09  | 0.01 | 5.22E-09  |
| ICAM5  | rs186021206 | 17 | 7166093   | A | G | 0.01 | 0.59  | 0.04 | 1.24E-20  |
| ICAM5  | rs77542162  | 17 | 69085137  | G | A | 0.02 | 0.52  | 0.02 | 3.25E-64  |
| ICAM5  | rs281439    | 19 | 10289434  | C | G | 0.78 | 0.84  | 0.01 | 0.00E+00  |
| ICOSLG | rs74152937  | 10 | 100045864 | A | G | 0.05 | 0.12  | 0.02 | 3.77E-06  |
| ICOSLG | rs7103461   | 11 | 126369390 | G | C | 0.13 | -0.07 | 0.01 | 2.36E-05  |
| ICOSLG | rs186021206 | 17 | 7166093   | A | G | 0.01 | 0.77  | 0.05 | 1.64E-24  |
| ICOSLG | rs6518352   | 21 | 44226815  | G | A | 0.72 | -0.40 | 0.01 | 3.99E-215 |

|        |             |    |           |   |   |      |       |      |           |
|--------|-------------|----|-----------|---|---|------|-------|------|-----------|
| IDI2   | rs1044261   | 10 | 1019770   | T | C | 0.08 | -0.60 | 0.01 | 5.30E-182 |
| IDI2   | -           | 13 | 73526441  | G | A | 0.50 | 0.05  | 0.01 | 6.64E-06  |
| IDS    | rs529565    | 9  | 133274084 | C | T | 0.32 | -0.06 | 0.01 | 5.44E-06  |
| IDS    | rs10128858  | 12 | 101827588 | G | A | 0.29 | -0.21 | 0.01 | 8.83E-63  |
| IDS    | rs704       | 17 | 28367840  | A | G | 0.47 | -0.09 | 0.01 | 4.33E-15  |
| IDUA   | rs6682862   | 1  | 177969302 | A | G | 0.17 | 0.06  | 0.01 | 6.17E-06  |
| IDUA   | rs687339    | 3  | 136213517 | T | C | 0.77 | 0.06  | 0.01 | 2.09E-07  |
| IDUA   | rs3796622   | 4  | 989272    | C | T | 0.64 | 0.54  | 0.01 | 0.00E+00  |
| IDUA   | rs114816312 | 4  | 109717668 | T | C | 0.01 | 0.30  | 0.04 | 5.45E-06  |
| IDUA   | rs2389688   | 4  | 118815641 | C | A | 0.44 | -0.05 | 0.01 | 7.55E-06  |
| IDUA   | rs11791806  | 9  | 34633532  | T | C | 0.17 | 0.06  | 0.01 | 1.08E-05  |
| IDUA   | rs10778152  | 12 | 101831973 | G | A | 0.29 | -0.24 | 0.01 | 3.30E-105 |
| IDUA   | rs2254971   | 12 | 121012581 | C | G | 0.37 | 0.05  | 0.01 | 1.84E-06  |
| IDUA   | rs71435622  | 14 | 39242324  | T | A | 0.29 | 0.06  | 0.01 | 2.00E-06  |
| IDUA   | rs145078947 | 14 | 93186629  | T | G | 0.00 | 0.73  | 0.06 | 2.47E-14  |
| IDUA   | rs139974673 | 15 | 43735687  | C | T | 0.02 | 0.20  | 0.02 | 1.82E-10  |
| IDUA   | rs58542926  | 19 | 19268740  | T | C | 0.08 | 0.12  | 0.01 | 3.67E-10  |
| IDUA   | rs429358    | 19 | 44908684  | C | T | 0.16 | -0.08 | 0.01 | 1.01E-08  |
| IDUA   | rs1883711   | 20 | 40551182  | C | G | 0.03 | 0.14  | 0.02 | 5.12E-06  |
| IFNG   | rs76830965  | 3  | 159919889 | A | C | 0.12 | 0.08  | 0.01 | 1.11E-05  |
| IFNG   | rs2844622   | 6  | 31272283  | G | A | 0.66 | 0.06  | 0.01 | 3.99E-06  |
| IFNGR1 | rs61747728  | 1  | 179557079 | T | C | 0.04 | 0.19  | 0.02 | 1.28E-10  |
| IFNGR1 | rs1260326   | 2  | 27508073  | C | T | 0.61 | 0.05  | 0.01 | 4.15E-06  |
| IFNGR1 | rs73065135  | 3  | 46847019  | C | G | 0.10 | 0.08  | 0.01 | 1.07E-05  |
| IFNGR1 | rs9853056   | 3  | 52521941  | C | T | 0.56 | 0.05  | 0.01 | 7.43E-06  |
| IFNGR1 | rs2394177   | 6  | 29819592  | G | A | 0.08 | 0.12  | 0.01 | 1.08E-08  |
| IFNGR1 | rs11754268  | 6  | 137219198 | T | C | 0.21 | -0.21 | 0.01 | 1.00E-55  |
| IFNGR1 | rs8176672   | 9  | 133266772 | T | C | 0.06 | 0.36  | 0.02 | 7.18E-56  |
| IFNGR1 | rs77924615  | 16 | 20381010  | A | G | 0.20 | -0.08 | 0.01 | 9.72E-09  |
| IFNGR1 | rs186021206 | 17 | 7166093   | A | G | 0.01 | 0.84  | 0.05 | 1.12E-28  |
| IFNGR1 | rs2659005   | 17 | 81244914  | T | C | 0.44 | 0.05  | 0.01 | 2.84E-06  |
| IFNGR2 | rs12740374  | 1  | 109274968 | T | G | 0.22 | -0.07 | 0.01 | 4.43E-13  |
| IFNGR2 | rs61804164  | 1  | 161653235 | C | G | 0.12 | 0.06  | 0.01 | 1.23E-05  |
| IFNGR2 | -           | 7  | 35695033  | C | G | 0.42 | -0.07 | 0.01 | 2.55E-18  |
| IFNGR2 | rs10901252  | 9  | 133252613 | C | G | 0.06 | 0.13  | 0.01 | 1.93E-13  |
| IFNGR2 | rs56278466  | 10 | 17833858  | G | T | 0.66 | 0.08  | 0.01 | 2.11E-18  |
| IFNGR2 | rs174564    | 11 | 61820833  | G | A | 0.35 | 0.10  | 0.01 | 6.31E-29  |
| IFNGR2 | rs12149545  | 16 | 56959249  | A | G | 0.32 | 0.05  | 0.01 | 2.03E-09  |
| IFNGR2 | rs72802342  | 16 | 75200974  | A | C | 0.08 | -0.07 | 0.01 | 6.24E-06  |
| IFNGR2 | rs756350040 | 19 | 19259531  | T | A | 0.07 | -0.07 | 0.01 | 2.76E-05  |
| IFNGR2 | rs1065853   | 19 | 44909976  | T | G | 0.08 | 0.11  | 0.01 | 2.48E-12  |
| IFNGR2 | rs492602    | 19 | 48703160  | G | A | 0.51 | -0.05 | 0.01 | 7.69E-11  |
| IFNGR2 | rs9808753   | 21 | 33415005  | G | A | 0.14 | 1.43  | 0.01 | 0.00E+00  |
| IFNL1  | rs35667974  | 2  | 162268127 | C | T | 0.02 | -0.32 | 0.03 | 4.77E-16  |
| IFNL1  | rs3775291   | 4  | 186082920 | T | C | 0.30 | -0.09 | 0.01 | 1.08E-13  |
| IFNL1  | rs9270747   | 6  | 32600515  | G | A | 0.66 | 0.07  | 0.01 | 4.92E-09  |
| IFNL1  | rs10642330  | 6  | 166955046 | T | C | 0.47 | -0.06 | 0.01 | 3.88E-06  |
| IFNL1  | rs10424978  | 19 | 4837545   | A | C | 0.60 | -0.06 | 0.01 | 4.00E-06  |
| IFNL1  | rs28668750  | 19 | 39329162  | T | G | 0.11 | -0.09 | 0.01 | 7.50E-06  |
| IFNLR1 | rs139958347 | 1  | 24187233  | C | G | 0.04 | -0.94 | 0.02 | 1.14E-188 |
| IFNLR1 | rs10753239  | 1  | 30889377  | C | T | 0.46 | -0.06 | 0.01 | 9.29E-07  |
| IFNLR1 | rs1801689   | 17 | 66214462  | C | A | 0.03 | 0.24  | 0.02 | 7.38E-13  |
| IGF1R  | rs9269047   | 6  | 32471006  | G | C | 0.85 | -0.12 | 0.01 | 2.37E-14  |
| IGF1R  | rs2519093   | 9  | 133266456 | T | C | 0.18 | -0.48 | 0.01 | 1.35E-251 |
| IGF1R  | rs3184504   | 12 | 111446804 | C | T | 0.52 | -0.06 | 0.01 | 8.68E-08  |
| IGF1R  | rs3743249   | 15 | 98962194  | T | G | 0.25 | 0.12  | 0.01 | 4.40E-22  |

|         |             |    |           |   |   |      |       |      |           |
|---------|-------------|----|-----------|---|---|------|-------|------|-----------|
| IGF1R   | rs11574938  | 16 | 30474072  | C | G | 0.52 | 0.09  | 0.01 | 5.64E-18  |
| IGF1R   | rs200489612 | 17 | 7203059   | A | G | 0.01 | 0.89  | 0.05 | 4.76E-29  |
| IGF1R   | rs9916257   | 17 | 35470352  | T | G | 0.44 | -0.06 | 0.01 | 5.46E-09  |
| IGF1R   | rs34006614  | 19 | 16331971  | T | C | 0.33 | -0.07 | 0.01 | 4.90E-09  |
| IGF1R   | rs760462    | 21 | 44908184  | C | T | 0.82 | 0.08  | 0.01 | 3.51E-08  |
| IGF2R   | rs6727484   | 2  | 112057425 | A | G | 0.17 | 0.07  | 0.01 | 4.66E-07  |
| IGF2R   | rs1265754   | 6  | 32335915  | A | T | 0.13 | 0.13  | 0.01 | 4.35E-14  |
| IGF2R   | rs2282140   | 6  | 160073489 | T | C | 0.13 | 0.55  | 0.01 | 5.97E-240 |
| IGF2R   | rs9987289   | 8  | 9325848   | G | A | 0.91 | -0.09 | 0.01 | 4.35E-06  |
| IGF2R   | rs72752535  | 9  | 114592585 | C | A | 0.01 | 0.42  | 0.05 | 3.44E-07  |
| IGF2R   | rs7974486   | 12 | 8979368   | G | A | 0.84 | 0.08  | 0.01 | 1.54E-07  |
| IGF2R   | rs11111000  | 12 | 101756445 | T | C | 0.09 | -0.12 | 0.01 | 2.12E-11  |
| IGF2R   | rs10144207  | 14 | 87967790  | T | C | 0.35 | -0.06 | 0.01 | 7.85E-07  |
| IGF2R   | rs145078947 | 14 | 93186629  | T | G | 0.00 | 1.00  | 0.07 | 1.52E-22  |
| IGF2R   | rs186021206 | 17 | 7166093   | A | G | 0.01 | 0.36  | 0.05 | 7.02E-07  |
| IGF2R   | rs1838105   | 17 | 46931569  | G | A | 0.65 | -0.05 | 0.01 | 1.18E-05  |
| IGF2R   | rs1801689   | 17 | 66214462  | C | A | 0.03 | 0.15  | 0.02 | 2.03E-06  |
| IGF2R   | rs200378    | 19 | 18178824  | C | T | 0.51 | 0.06  | 0.01 | 1.40E-08  |
| IGF2R   | rs746064    | 21 | 41209521  | A | G | 0.38 | 0.05  | 0.01 | 2.45E-05  |
| IGFBP1  | rs12740374  | 1  | 109274968 | T | G | 0.22 | -0.07 | 0.01 | 1.19E-07  |
| IGFBP1  | rs1260326   | 2  | 27508073  | C | T | 0.61 | -0.08 | 0.01 | 8.27E-12  |
| IGFBP2  | rs1260326   | 2  | 27508073  | C | T | 0.61 | 0.07  | 0.01 | 2.19E-08  |
| IGFBP2  | rs4674100   | 2  | 216615701 | A | G | 0.29 | -0.07 | 0.01 | 5.54E-08  |
| IGFBP2  | rs13108218  | 4  | 3442204   | G | A | 0.62 | -0.05 | 0.01 | 5.02E-06  |
| IGFBP2  | rs34690971  | 4  | 148059521 | T | A | 0.74 | 0.06  | 0.01 | 3.01E-06  |
| IGFBP3  | rs4234798   | 4  | 7218206   | G | T | 0.62 | 0.10  | 0.01 | 1.32E-21  |
| IGFBP3  | rs71538508  | 6  | 32567140  | T | C | 0.28 | 0.06  | 0.01 | 4.50E-06  |
| IGFBP3  | rs2854746   | 7  | 45921046  | C | G | 0.40 | 0.45  | 0.01 | 0.00E+00  |
| IGFBP3  | rs9987289   | 8  | 9325848   | G | A | 0.91 | -0.08 | 0.01 | 5.57E-06  |
| IGFBP3  | rs73485896  | 16 | 1816338   | A | G | 0.07 | 0.21  | 0.01 | 3.37E-26  |
| IGFBP3  | rs738409    | 22 | 43928847  | G | C | 0.22 | -0.07 | 0.01 | 1.37E-07  |
| IGFBP4  | rs13146355  | 4  | 76490987  | A | G | 0.46 | 0.06  | 0.01 | 2.95E-07  |
| IGFBP4  | rs10265221  | 7  | 151717243 | C | T | 0.29 | 0.05  | 0.01 | 1.40E-05  |
| IGFBP4  | rs28640218  | 16 | 20347945  | T | G | 0.19 | -0.07 | 0.01 | 8.01E-07  |
| IGFBP6  | rs13146355  | 4  | 76490987  | A | G | 0.46 | 0.05  | 0.01 | 1.18E-06  |
| IGFBP6  | rs10265221  | 7  | 151717243 | C | T | 0.29 | 0.06  | 0.01 | 8.14E-07  |
| IGFBP6  | rs10876406  | 12 | 53107653  | C | T | 0.10 | -0.14 | 0.01 | 1.49E-16  |
| IGFBP6  | rs4997081   | 16 | 20353912  | C | G | 0.19 | -0.08 | 0.01 | 1.33E-10  |
| IGFBP7  | rs1718860   | 4  | 57083351  | A | G | 0.73 | -0.37 | 0.01 | 6.26E-208 |
| IGFBP7  | rs3104394   | 6  | 32699743  | A | G | 0.86 | -0.12 | 0.01 | 2.20E-16  |
| IGFBP7  | rs7282172   | 21 | 45026946  | G | C | 0.17 | 0.06  | 0.01 | 4.81E-06  |
| IGFBP7  | rs738409    | 22 | 43928847  | G | C | 0.22 | 0.06  | 0.01 | 5.60E-06  |
| IGFBPL1 | rs1260326   | 2  | 27508073  | C | T | 0.61 | -0.07 | 0.01 | 9.82E-11  |
| IGFBPL1 | rs7857243   | 9  | 38409084  | A | G | 0.81 | 0.49  | 0.01 | 1.17E-286 |
| IGFBPL1 | -           | 12 | 57001714  | G | A | 0.08 | 0.10  | 0.01 | 9.47E-08  |
| IGSF3   | rs2284860   | 1  | 116580265 | C | T | 0.22 | 0.11  | 0.01 | 3.50E-15  |
| IGSF3   | rs7529665   | 1  | 205155743 | A | G | 0.23 | 0.06  | 0.01 | 2.51E-05  |
| IGSF3   | rs8176749   | 9  | 133255801 | T | C | 0.06 | 0.14  | 0.02 | 1.52E-09  |
| IGSF3   | rs56278466  | 10 | 17833858  | G | T | 0.66 | 0.15  | 0.01 | 1.27E-38  |
| IGSF3   | rs3747207   | 22 | 43928975  | A | G | 0.22 | 0.07  | 0.01 | 2.52E-06  |
| IGSF8   | rs12408242  | 1  | 160092144 | C | T | 0.22 | 0.16  | 0.01 | 7.71E-30  |
| IGSF8   | rs6967348   | 7  | 129607293 | A | G | 0.91 | -0.09 | 0.01 | 2.17E-05  |
| IGSF8   | rs6993770   | 8  | 105569300 | T | A | 0.29 | -0.09 | 0.01 | 1.53E-11  |
| IGSF8   | rs28365809  | 11 | 130159766 | C | T | 0.15 | -0.13 | 0.01 | 1.09E-15  |
| IGSF8   | rs892090    | 19 | 55027704  | G | T | 0.83 | 0.08  | 0.01 | 1.07E-06  |
| IGSF8   | rs28823595  | 20 | 3724486   | A | G | 0.09 | 0.09  | 0.01 | 2.76E-05  |

|             |             |    |           |   |   |      |       |      |           |
|-------------|-------------|----|-----------|---|---|------|-------|------|-----------|
| IKBKG       | rs1354034   | 3  | 56815721  | C | T | 0.60 | 0.05  | 0.01 | 2.08E-05  |
| IKZF2       | rs34136174  | 6  | 32615905  | C | A | 0.43 | 0.08  | 0.01 | 2.30E-10  |
| IKZF2       | rs762465    | 22 | 22220463  | T | C | 0.64 | 0.11  | 0.01 | 3.13E-18  |
| IL10        | rs2476601   | 1  | 113834946 | G | A | 0.90 | -0.08 | 0.01 | 1.65E-05  |
| IL10        | rs3024495   | 1  | 206769068 | T | C | 0.15 | -0.14 | 0.01 | 8.35E-19  |
| IL10        | rs67619842  | 6  | 32568308  | T | A | 0.12 | 0.18  | 0.01 | 6.20E-24  |
| IL10        | rs3135932   | 11 | 117993348 | G | A | 0.17 | 0.26  | 0.01 | 5.16E-65  |
| IL10        | rs7203793   | 16 | 11088277  | G | C | 0.36 | -0.07 | 0.01 | 6.30E-08  |
| IL10        | rs9303280   | 17 | 39917778  | C | T | 0.50 | 0.05  | 0.01 | 1.25E-05  |
| IL10RA      | rs3135932   | 11 | 117993348 | G | A | 0.17 | 0.19  | 0.01 | 7.54E-34  |
| IL10RB      | rs7532110   | 1  | 47496292  | A | T | 0.80 | 0.06  | 0.01 | 1.51E-05  |
| IL10RB      | rs61747728  | 1  | 179557079 | T | C | 0.04 | 0.19  | 0.02 | 1.80E-12  |
| IL10RB      | rs532436    | 9  | 133274414 | A | G | 0.18 | -0.08 | 0.01 | 2.32E-08  |
| IL10RB      | rs777834943 | 16 | 20355409  | T | C | 0.18 | -0.06 | 0.01 | 1.04E-05  |
| IL10RB      | rs186021206 | 17 | 7166093   | A | G | 0.01 | 0.40  | 0.05 | 1.85E-08  |
| IL10RB      | rs2659005   | 17 | 81244914  | T | C | 0.44 | 0.07  | 0.01 | 4.76E-11  |
| IL10RB      | rs2247960   | 21 | 33288840  | G | A | 0.45 | 0.52  | 0.01 | 0.00E+00  |
| IL11        | rs188468174 | 1  | 24965206  | T | C | 0.01 | 0.23  | 0.03 | 1.08E-05  |
| IL12A_IL12B | rs12471768  | 2  | 64701469  | C | T | 0.71 | 0.05  | 0.01 | 9.88E-06  |
| IL12A_IL12B | rs13025330  | 2  | 111093635 | T | C | 0.22 | -0.06 | 0.01 | 3.65E-06  |
| IL12A_IL12B | rs72852162  | 2  | 144728756 | C | A | 0.11 | 0.08  | 0.01 | 5.83E-06  |
| IL12A_IL12B | rs11130215  | 3  | 4984323   | G | A | 0.17 | 0.10  | 0.01 | 7.41E-12  |
| IL12A_IL12B | rs9815073   | 3  | 188397894 | A | C | 0.34 | 0.30  | 0.01 | 2.64E-156 |
| IL12A_IL12B | rs4244437   | 5  | 159346109 | A | G | 0.68 | 0.54  | 0.01 | 0.00E+00  |
| IL12A_IL12B | rs9265987   | 6  | 31348511  | C | T | 0.32 | 0.10  | 0.01 | 1.32E-20  |
| IL12A_IL12B | rs836559    | 7  | 6409132   | C | G | 0.46 | 0.07  | 0.01 | 1.04E-10  |
| IL12A_IL12B | rs4641365   | 10 | 23377333  | T | C | 0.21 | -0.06 | 0.01 | 1.87E-06  |
| IL12A_IL12B | rs11039216  | 11 | 47385041  | T | C | 0.53 | 0.05  | 0.01 | 1.00E-05  |
| IL12A_IL12B | rs561877    | 11 | 96286090  | A | G | 0.32 | -0.06 | 0.01 | 7.50E-07  |
| IL12A_IL12B | rs10876864  | 12 | 56007301  | A | G | 0.57 | -0.07 | 0.01 | 3.98E-11  |
| IL12A_IL12B | rs3184504   | 12 | 111446804 | C | T | 0.52 | -0.13 | 0.01 | 7.52E-36  |
| IL12A_IL12B | rs76428106  | 13 | 28029870  | C | T | 0.01 | 0.38  | 0.03 | 2.14E-15  |
| IL12A_IL12B | -           | 14 | 68710109  | G | T | 0.26 | 0.06  | 0.01 | 5.12E-07  |
| IL12A_IL12B | rs12588969  | 14 | 102764421 | C | G | 0.68 | -0.11 | 0.01 | 9.89E-22  |
| IL12A_IL12B | rs1987102   | 15 | 79973546  | C | T | 0.26 | -0.07 | 0.01 | 5.31E-10  |
| IL12A_IL12B | rs7251900   | 19 | 55278914  | C | T | 0.67 | -0.05 | 0.01 | 1.13E-05  |
| IL12B       | rs58394161  | 1  | 92474402  | C | T | 0.15 | 0.07  | 0.01 | 7.26E-06  |
| IL12B       | rs2422287   | 2  | 64717631  | T | C | 0.68 | 0.05  | 0.01 | 8.70E-06  |
| IL12B       | rs13025330  | 2  | 111093635 | T | C | 0.22 | -0.06 | 0.01 | 7.06E-06  |
| IL12B       | rs72852162  | 2  | 144728756 | C | A | 0.11 | 0.08  | 0.01 | 3.36E-07  |
| IL12B       | rs11130215  | 3  | 4984323   | G | A | 0.17 | 0.09  | 0.01 | 1.52E-10  |
| IL12B       | rs9815073   | 3  | 188397894 | A | C | 0.34 | 0.30  | 0.01 | 1.32E-160 |
| IL12B       | rs11739135  | 5  | 132397705 | C | G | 0.41 | 0.05  | 0.01 | 1.48E-05  |
| IL12B       | rs4244437   | 5  | 159346109 | A | G | 0.68 | 0.56  | 0.01 | 0.00E+00  |
| IL12B       | rs2394982   | 6  | 31345253  | T | C | 0.31 | 0.11  | 0.01 | 2.45E-21  |
| IL12B       | rs836558    | 7  | 6408360   | A | C | 0.46 | 0.07  | 0.01 | 3.29E-11  |
| IL12B       | rs4427476   | 10 | 23381873  | T | G | 0.20 | -0.06 | 0.01 | 4.07E-06  |
| IL12B       | rs11039216  | 11 | 47385041  | T | C | 0.53 | 0.05  | 0.01 | 2.08E-06  |
| IL12B       | rs502822    | 11 | 96289325  | T | C | 0.30 | -0.06 | 0.01 | 1.98E-07  |
| IL12B       | rs10876864  | 12 | 56007301  | A | G | 0.57 | -0.07 | 0.01 | 2.02E-11  |
| IL12B       | rs3184504   | 12 | 111446804 | C | T | 0.52 | -0.13 | 0.01 | 9.14E-38  |
| IL12B       | rs76428106  | 13 | 28029870  | C | T | 0.01 | 0.38  | 0.03 | 3.95E-16  |
| IL12B       | rs374173    | 14 | 68715402  | C | G | 0.48 | -0.05 | 0.01 | 3.85E-07  |
| IL12B       | rs12588969  | 14 | 102764421 | C | G | 0.68 | -0.11 | 0.01 | 2.17E-22  |
| IL12B       | rs1987102   | 15 | 79973546  | C | T | 0.26 | -0.08 | 0.01 | 8.48E-11  |
| IL12B       | rs73068668  | 19 | 55251894  | A | G | 0.08 | 0.09  | 0.01 | 5.67E-06  |

|         |             |    |           |   |   |      |       |      |           |
|---------|-------------|----|-----------|---|---|------|-------|------|-----------|
| IL12RB1 | rs2844619   | 6  | 31274446  | G | C | 0.61 | 0.08  | 0.01 | 1.23E-13  |
| IL12RB1 | rs950802    | 11 | 60385111  | A | G | 0.31 | 0.28  | 0.01 | 2.00E-120 |
| IL12RB1 | rs35350651  | 12 | 111469627 | C | A | 0.50 | -0.08 | 0.01 | 2.29E-13  |
| IL12RB1 | rs12720356  | 19 | 10359299  | C | A | 0.10 | -0.13 | 0.01 | 3.77E-12  |
| IL12RB1 | rs447009    | 19 | 18074382  | A | C | 0.21 | -0.46 | 0.01 | 3.44E-249 |
| IL13    | rs34118068  | 14 | 105968520 | A | G | 0.11 | 0.15  | 0.01 | 4.90E-14  |
| IL13RA1 | rs139130389 | 11 | 72139110  | A | C | 0.07 | -0.14 | 0.01 | 2.58E-10  |
| IL13RA1 | rs123698    | 19 | 807442    | C | G | 0.61 | 0.07  | 0.01 | 9.71E-10  |
| IL13RA1 | rs73201506  | 21 | 31672095  | G | A | 0.05 | -0.14 | 0.02 | 8.07E-07  |
| IL15    | rs149968614 | 1  | 64846685  | T | C | 0.00 | 0.67  | 0.09 | 1.27E-06  |
| IL15    | rs6693121   | 1  | 101279077 | A | C | 0.41 | 0.05  | 0.01 | 7.18E-06  |
| IL15    | rs2009581   | 2  | 111050100 | A | G | 0.27 | 0.14  | 0.01 | 3.35E-29  |
| IL15    | rs1058315   | 2  | 231709234 | C | G | 0.23 | -0.07 | 0.01 | 1.31E-06  |
| IL15    | rs4683324   | 3  | 47209794  | C | T | 0.58 | -0.08 | 0.01 | 1.24E-12  |
| IL15    | rs9844706   | 3  | 128661938 | A | G | 0.89 | -0.08 | 0.01 | 4.01E-06  |
| IL15    | rs3131623   | 6  | 31451033  | A | T | 0.18 | 0.15  | 0.01 | 1.43E-25  |
| IL15    | rs173288    | 6  | 109205086 | G | C | 0.58 | -0.05 | 0.01 | 4.80E-06  |
| IL15    | rs78997768  | 8  | 59167516  | T | G | 0.16 | -0.07 | 0.01 | 2.41E-06  |
| IL15    | rs1378901   | 8  | 127201562 | C | T | 0.44 | 0.05  | 0.01 | 6.44E-06  |
| IL15    | rs8177636   | 10 | 5976631   | C | T | 0.43 | -0.06 | 0.01 | 1.18E-06  |
| IL15    | rs2646420   | 10 | 8425074   | T | C | 0.38 | -0.06 | 0.01 | 5.17E-08  |
| IL15    | rs1926197   | 10 | 88988869  | G | A | 0.45 | -0.06 | 0.01 | 7.67E-07  |
| IL15    | rs12363646  | 11 | 128197447 | C | T | 0.29 | -0.06 | 0.01 | 1.96E-06  |
| IL15    | rs7310615   | 12 | 111427245 | G | C | 0.52 | 0.09  | 0.01 | 2.88E-15  |
| IL15    | rs76428106  | 13 | 28029870  | C | T | 0.01 | -0.30 | 0.03 | 8.57E-09  |
| IL15    | rs11632933  | 15 | 70451887  | A | G | 0.62 | 0.05  | 0.01 | 6.39E-06  |
| IL15    | rs9916257   | 17 | 35470352  | T | G | 0.44 | 0.15  | 0.01 | 1.34E-37  |
| IL15    | rs3212802   | 19 | 17826295  | T | G | 0.18 | 0.09  | 0.01 | 1.89E-09  |
| IL15    | rs7268811   | 20 | 36922468  | A | C | 0.17 | 0.07  | 0.01 | 8.75E-06  |
| IL15    | rs35477491  | 21 | 13901496  | T | C | 0.22 | 0.07  | 0.01 | 1.12E-05  |
| IL15    | rs228951    | 22 | 37133758  | G | A | 0.37 | 0.07  | 0.01 | 7.66E-10  |
| IL15RA  | rs539115936 | 5  | 96887303  | T | C | 0.47 | -0.06 | 0.01 | 1.43E-07  |
| IL15RA  | rs1050486   | 6  | 31356925  | T | C | 0.62 | 0.06  | 0.01 | 5.05E-07  |
| IL15RA  | -           | 9  | 133263362 | G | A | 0.18 | -0.08 | 0.01 | 1.06E-07  |
| IL15RA  | rs3136630   | 10 | 5955857   | T | C | 0.30 | -0.26 | 0.01 | 8.51E-96  |
| IL15RA  | rs111338191 | 12 | 111388673 | T | A | 0.52 | -0.05 | 0.01 | 1.89E-06  |
| IL16    | rs12342201  | 9  | 93132682  | A | G | 0.48 | -0.06 | 0.01 | 1.27E-09  |
| IL16    | rs58754882  | 15 | 81303017  | A | G | 0.09 | -0.96 | 0.01 | 0.00E+00  |
| IL17C   | rs144937970 | 3  | 9910943   | A | G | 0.01 | 0.34  | 0.04 | 5.59E-08  |
| IL17C   | rs8177833   | 5  | 151087129 | G | C | 0.06 | 0.11  | 0.02 | 1.70E-05  |
| IL17C   | rs17700884  | 16 | 88618087  | T | G | 0.36 | -0.12 | 0.01 | 1.28E-24  |
| IL17D   | rs4770059   | 13 | 20576908  | C | T | 0.74 | -0.40 | 0.01 | 5.22E-246 |
| IL17D   | rs77542162  | 17 | 69085137  | G | A | 0.02 | 0.24  | 0.02 | 1.45E-12  |
| IL17D   | rs1065853   | 19 | 44909976  | T | G | 0.08 | 0.08  | 0.01 | 2.59E-05  |
| IL17F   | rs66834286  | 6  | 52241065  | T | C | 0.11 | -0.26 | 0.01 | 1.51E-42  |
| IL17F   | rs10152051  | 14 | 106116963 | G | A | 0.45 | -0.07 | 0.01 | 1.36E-07  |
| IL17RA  | rs78689694  | 11 | 126364925 | C | G | 0.13 | -0.07 | 0.01 | 1.45E-07  |
| IL17RA  | rs186021206 | 17 | 7166093   | A | G | 0.01 | 0.49  | 0.04 | 6.41E-18  |
| IL17RA  | rs4819959   | 22 | 17105741  | A | G | 0.50 | 0.85  | 0.01 | 0.00E+00  |
| IL17RB  | rs1260326   | 2  | 27508073  | C | T | 0.61 | 0.06  | 0.01 | 9.91E-10  |
| IL17RB  | rs6445607   | 3  | 53843122  | T | G | 0.62 | -0.80 | 0.01 | 0.00E+00  |
| IL17RB  | rs7643425   | 3  | 171019606 | G | A | 0.11 | -0.08 | 0.01 | 6.87E-06  |
| IL17RB  | rs34690971  | 4  | 148059521 | T | A | 0.74 | 0.05  | 0.01 | 1.78E-05  |
| IL17RB  | rs2894204   | 6  | 31269284  | T | C | 0.63 | -0.07 | 0.01 | 2.57E-12  |
| IL17RB  | rs34346326  | 7  | 73601851  | C | T | 0.20 | 0.05  | 0.01 | 2.24E-06  |
| IL17RB  | rs1870148   | 10 | 80511585  | A | G | 0.79 | 0.05  | 0.01 | 1.36E-06  |

|         |             |    |           |   |   |      |       |      |           |
|---------|-------------|----|-----------|---|---|------|-------|------|-----------|
| IL17RB  | rs10841753  | 12 | 21168436  | C | T | 0.19 | 0.06  | 0.01 | 2.70E-08  |
| IL17RB  | rs1169284   | 12 | 120982123 | C | T | 0.31 | -0.06 | 0.01 | 1.07E-08  |
| IL17RB  | rs28929474  | 14 | 94378610  | T | C | 0.02 | 0.23  | 0.02 | 1.82E-13  |
| IL17RB  | rs77542162  | 17 | 69085137  | G | A | 0.02 | 0.15  | 0.02 | 6.25E-07  |
| IL18    | rs385076    | 2  | 32264782  | C | T | 0.64 | 0.22  | 0.01 | 1.77E-84  |
| IL18    | rs77762937  | 2  | 202602747 | T | G | 0.29 | 0.06  | 0.01 | 2.89E-06  |
| IL18    | -           | 5  | 69992376  | C | A | 0.06 | 0.24  | 0.02 | 2.38E-21  |
| IL18    | rs130066    | 6  | 31154538  | C | G | 0.46 | -0.05 | 0.01 | 2.33E-06  |
| IL18    | rs2290414   | 8  | 143561433 | A | G | 0.44 | -0.07 | 0.01 | 3.19E-11  |
| IL18    | rs117558678 | 11 | 270330    | T | A | 0.24 | 0.07  | 0.01 | 2.75E-08  |
| IL18    | rs17103763  | 11 | 105133145 | A | T | 0.26 | 0.11  | 0.01 | 2.65E-17  |
| IL18    | rs2250417   | 11 | 112214593 | C | T | 0.54 | -0.29 | 0.01 | 7.10E-155 |
| IL18    | rs10675507  | 12 | 47838013  | T | C | 0.52 | -0.05 | 0.01 | 9.92E-06  |
| IL18    | rs7137828   | 12 | 111494996 | T | C | 0.52 | -0.07 | 0.01 | 9.68E-10  |
| IL18    | rs10418046  | 19 | 53824615  | G | T | 0.21 | 0.06  | 0.01 | 1.53E-06  |
| IL18BP  | rs61747728  | 1  | 179557079 | T | C | 0.04 | 0.17  | 0.02 | 6.74E-09  |
| IL18BP  | rs3132455   | 6  | 31520177  | C | G | 0.35 | 0.05  | 0.01 | 2.42E-05  |
| IL18BP  | rs10901252  | 9  | 133252613 | C | G | 0.06 | 0.16  | 0.01 | 1.29E-11  |
| IL18BP  | rs5743659   | 11 | 71998832  | A | G | 0.01 | -0.55 | 0.05 | 1.74E-14  |
| IL18BP  | rs766175824 | 11 | 126356659 | G | A | 0.07 | 0.14  | 0.01 | 6.34E-11  |
| IL18BP  | rs10774625  | 12 | 111472415 | G | A | 0.50 | -0.12 | 0.01 | 6.75E-28  |
| IL18BP  | rs4767937   | 12 | 120785441 | C | G | 0.47 | -0.05 | 0.01 | 3.83E-06  |
| IL18BP  | rs186021206 | 17 | 7166093   | A | G | 0.01 | 0.86  | 0.05 | 8.79E-31  |
| IL18BP  | rs1292045   | 17 | 59869851  | C | T | 0.47 | -0.05 | 0.01 | 2.76E-05  |
| IL18BP  | rs10445407  | 17 | 81288009  | A | C | 0.48 | -0.05 | 0.01 | 8.47E-06  |
| IL18R1  | -           | 1  | 161704318 | G | A | 0.11 | 0.09  | 0.01 | 1.32E-08  |
| IL18R1  | rs10190555  | 2  | 102377596 | G | A | 0.77 | -0.89 | 0.01 | 0.00E+00  |
| IL18R1  | rs407258    | 3  | 155843189 | C | T | 0.25 | -0.07 | 0.01 | 4.88E-10  |
| IL18R1  | rs28636815  | 4  | 76276244  | G | A | 0.38 | -0.04 | 0.01 | 4.93E-06  |
| IL18R1  | rs73015965  | 6  | 160706469 | G | A | 0.01 | 0.27  | 0.04 | 2.24E-05  |
| IL18R1  | -           | 7  | 35695033  | C | G | 0.42 | -0.04 | 0.01 | 2.10E-05  |
| IL18R1  | rs2519093   | 9  | 133266456 | T | C | 0.18 | -0.05 | 0.01 | 1.83E-05  |
| IL18R1  | rs56278466  | 10 | 17833858  | G | T | 0.66 | 0.11  | 0.01 | 2.22E-32  |
| IL18R1  | rs111338191 | 12 | 111388673 | T | A | 0.52 | -0.04 | 0.01 | 2.57E-06  |
| IL18R1  | rs7970695   | 12 | 120985573 | A | G | 0.62 | -0.05 | 0.01 | 5.46E-07  |
| IL18R1  | rs28929474  | 14 | 94378610  | T | C | 0.02 | 0.26  | 0.02 | 2.62E-16  |
| IL18R1  | rs147233090 | 15 | 43735849  | T | C | 0.02 | 0.15  | 0.02 | 2.47E-06  |
| IL18R1  | rs77303550  | 16 | 72045758  | T | C | 0.20 | -0.07 | 0.01 | 1.65E-08  |
| IL18R1  | rs1801689   | 17 | 66214462  | C | A | 0.03 | 0.43  | 0.02 | 7.79E-60  |
| IL18R1  | rs12019136  | 19 | 5835666   | A | G | 0.04 | 0.11  | 0.01 | 1.04E-06  |
| IL18RAP | rs72490060  | 2  | 88998554  | T | C | 0.19 | 0.12  | 0.01 | 2.17E-12  |
| IL18RAP | rs4110740   | 2  | 94747462  | T | C | 0.21 | 0.08  | 0.01 | 1.17E-07  |
| IL18RAP | rs9380143   | 6  | 29834268  | T | C | 0.28 | -0.08 | 0.01 | 2.59E-09  |
| IL18RAP | rs4774021   | 14 | 106809925 | T | G | 0.14 | 0.16  | 0.01 | 2.07E-21  |
| IL19    | rs2243191   | 1  | 206842612 | C | T | 0.78 | 0.35  | 0.01 | 6.60E-158 |
| IL19    | rs80235202  | 6  | 32536054  | G | A | 0.28 | 0.06  | 0.01 | 1.27E-05  |
| IL19    | rs34819998  | 11 | 126351095 | C | G | 0.15 | 0.08  | 0.01 | 4.38E-06  |
| IL19    | rs2608894   | 19 | 5847989   | C | T | 0.76 | -0.07 | 0.01 | 3.46E-07  |
| IL19    | rs492602    | 19 | 48703160  | G | A | 0.51 | 0.38  | 0.01 | 3.10E-250 |
| IL1A    | rs28464365  | 6  | 32619273  | C | T | 0.04 | -0.27 | 0.02 | 3.63E-21  |
| IL1B    | rs6993770   | 8  | 105569300 | T | A | 0.29 | -0.08 | 0.01 | 4.02E-09  |
| IL1B    | rs34436714  | 19 | 53824059  | A | C | 0.21 | 0.29  | 0.01 | 3.53E-97  |
| IL1R1   | rs61830291  | 1  | 220827800 | C | A | 0.10 | -0.12 | 0.01 | 7.21E-11  |
| IL1R1   | rs6545929   | 2  | 62383044  | A | G | 0.19 | -0.08 | 0.01 | 7.47E-09  |
| IL1R1   | rs3917238   | 2  | 102156623 | T | C | 0.30 | -0.18 | 0.01 | 5.37E-52  |
| IL1R1   | rs55709272  | 2  | 113109711 | C | T | 0.44 | 0.14  | 0.01 | 1.14E-33  |

|        |             |    |           |   |   |      |       |      |           |
|--------|-------------|----|-----------|---|---|------|-------|------|-----------|
| IL1R1  | rs10935473  | 3  | 98698056  | T | G | 0.44 | -0.29 | 0.01 | 2.18E-148 |
| IL1R1  | rs1634775   | 6  | 31335459  | G | A | 0.62 | -0.07 | 0.01 | 6.38E-11  |
| IL1R1  | rs9987289   | 8  | 9325848   | G | A | 0.91 | -0.08 | 0.01 | 1.27E-05  |
| IL1R1  | rs8176672   | 9  | 133266772 | T | C | 0.06 | 0.21  | 0.01 | 7.48E-20  |
| IL1R1  | rs56278466  | 10 | 17833858  | G | T | 0.66 | 0.06  | 0.01 | 3.23E-08  |
| IL1R1  | rs28929474  | 14 | 94378610  | T | C | 0.02 | 0.25  | 0.03 | 1.23E-10  |
| IL1R1  | rs186021206 | 17 | 7166093   | A | G | 0.01 | 0.59  | 0.05 | 7.88E-15  |
| IL1R1  | rs2292642   | 17 | 78399349  | T | C | 0.60 | -0.07 | 0.01 | 5.56E-10  |
| IL1R1  | rs67525224  | 21 | 41255293  | C | G | 0.19 | 0.11  | 0.01 | 5.07E-14  |
| IL1R2  | rs165316    | 1  | 91067740  | G | A | 0.20 | -0.06 | 0.01 | 2.32E-06  |
| IL1R2  | rs629301    | 1  | 109275684 | T | G | 0.78 | -0.07 | 0.01 | 6.09E-08  |
| IL1R2  | rs2310170   | 2  | 101999692 | G | T | 0.40 | -0.51 | 0.01 | 0.00E+00  |
| IL1R2  | rs9274718   | 6  | 32669692  | C | T | 0.38 | 0.07  | 0.01 | 3.91E-10  |
| IL1R2  | rs6973520   | 7  | 129100389 | T | C | 0.51 | 0.07  | 0.01 | 1.75E-10  |
| IL1R2  | rs28601761  | 8  | 125487789 | G | C | 0.42 | -0.12 | 0.01 | 1.68E-31  |
| IL1R2  | rs1870138   | 10 | 80509855  | G | A | 0.80 | 0.08  | 0.01 | 7.11E-11  |
| IL1R2  | rs10831245  | 11 | 94586722  | A | G | 0.39 | 0.07  | 0.01 | 9.19E-10  |
| IL1R2  | rs60843925  | 11 | 126368937 | C | T | 0.14 | -0.07 | 0.01 | 1.45E-05  |
| IL1R2  | rs11045856  | 12 | 21197755  | G | T | 0.24 | 0.07  | 0.01 | 1.18E-07  |
| IL1R2  | rs1169296   | 12 | 120990604 | G | A | 0.33 | 0.07  | 0.01 | 6.59E-11  |
| IL1R2  | rs11621792  | 14 | 24402720  | T | C | 0.45 | -0.05 | 0.01 | 7.80E-06  |
| IL1R2  | rs186021206 | 17 | 7166093   | A | G | 0.01 | 0.48  | 0.05 | 1.85E-11  |
| IL1R2  | rs77542162  | 17 | 69085137  | G | A | 0.02 | 0.17  | 0.02 | 2.19E-06  |
| IL1RAP | rs6444442   | 3  | 190628271 | G | A | 0.85 | -1.39 | 0.01 | 0.00E+00  |
| IL1RAP | -           | 4  | 99103313  | T | A | 0.73 | 0.04  | 0.01 | 1.86E-06  |
| IL1RAP | rs753950345 | 5  | 132882930 | A | C | 0.16 | 0.06  | 0.01 | 1.89E-08  |
| IL1RAP | rs146812806 | 8  | 18414993  | G | C | 0.78 | -0.05 | 0.01 | 2.04E-09  |
| IL1RAP | rs7310409   | 12 | 120987058 | G | A | 0.62 | 0.04  | 0.00 | 3.48E-07  |
| IL1RAP | rs139974673 | 15 | 43735687  | C | T | 0.02 | 0.19  | 0.02 | 2.15E-15  |
| IL1RAP | rs273510    | 19 | 18112540  | G | A | 0.29 | -0.04 | 0.01 | 1.09E-07  |
| IL1RL1 | rs13028833  | 2  | 61417194  | G | C | 0.52 | 0.06  | 0.01 | 1.24E-08  |
| IL1RL1 | rs12470864  | 2  | 102309902 | A | G | 0.39 | -0.68 | 0.01 | 0.00E+00  |
| IL1RL1 | rs1257221   | 2  | 134259047 | C | A | 0.76 | -0.06 | 0.01 | 3.30E-07  |
| IL1RL1 | rs7616330   | 3  | 71066600  | A | C | 0.17 | -0.05 | 0.01 | 5.28E-06  |
| IL1RL1 | rs9829963   | 3  | 143181686 | C | T | 0.21 | 0.07  | 0.01 | 3.34E-11  |
| IL1RL1 | rs13107325  | 4  | 102267552 | T | C | 0.08 | 0.11  | 0.01 | 3.43E-12  |
| IL1RL1 | rs2519093   | 9  | 133266456 | T | C | 0.18 | -0.09 | 0.01 | 5.76E-17  |
| IL1RL1 | rs11603123  | 11 | 126435600 | A | G | 0.03 | 0.38  | 0.02 | 1.30E-58  |
| IL1RL1 | rs1378942   | 15 | 74785026  | A | C | 0.68 | 0.05  | 0.01 | 4.03E-08  |
| IL1RL1 | rs12447180  | 16 | 88451314  | C | T | 0.33 | -0.06 | 0.01 | 1.95E-10  |
| IL1RL1 | rs186021206 | 17 | 7166093   | A | G | 0.01 | 0.96  | 0.04 | 1.50E-61  |
| IL1RL1 | rs58526981  | 17 | 60919686  | T | A | 0.16 | -0.06 | 0.01 | 1.59E-07  |
| IL1RL1 | rs2899319   | 22 | 39478309  | C | A | 0.62 | 0.04  | 0.01 | 7.31E-07  |
| IL1RL2 | rs10779835  | 1  | 230164203 | C | T | 0.61 | -0.05 | 0.01 | 1.27E-05  |
| IL1RL2 | rs3917265   | 2  | 102162001 | C | T | 0.54 | -0.44 | 0.01 | 0.00E+00  |
| IL1RL2 | rs11928797  | 3  | 33416001  | A | C | 0.12 | 0.08  | 0.01 | 1.65E-06  |
| IL1RL2 | rs13203302  | 6  | 95559822  | T | C | 0.08 | 0.11  | 0.01 | 3.58E-09  |
| IL1RL2 | rs10815254  | 9  | 5630344   | T | C | 0.28 | 0.05  | 0.01 | 9.98E-06  |
| IL1RL2 | rs56278466  | 10 | 17833858  | G | T | 0.66 | 0.07  | 0.01 | 8.11E-10  |
| IL1RL2 | rs2291075   | 12 | 21178691  | T | C | 0.39 | 0.05  | 0.01 | 2.92E-06  |
| IL1RL2 | rs11065385  | 12 | 120985583 | G | A | 0.69 | -0.16 | 0.01 | 2.11E-49  |
| IL1RL2 | rs17774889  | 14 | 49593139  | C | G | 0.55 | 0.06  | 0.01 | 5.28E-08  |
| IL1RL2 | rs28929474  | 14 | 94378610  | T | C | 0.02 | 0.22  | 0.02 | 2.07E-09  |
| IL1RL2 | rs62011287  | 15 | 63499029  | G | A | 0.34 | -0.05 | 0.01 | 1.00E-06  |
| IL1RL2 | rs7599      | 19 | 35547488  | G | A | 0.63 | -0.06 | 0.01 | 9.20E-08  |
| IL1RN  | rs55709272  | 2  | 113109711 | C | T | 0.44 | -0.21 | 0.01 | 3.49E-75  |

|         |             |    |           |   |   |      |       |      |           |
|---------|-------------|----|-----------|---|---|------|-------|------|-----------|
| IL1RN   | rs12941811  | 17 | 40003082  | C | T | 0.57 | -0.06 | 0.01 | 1.16E-06  |
| IL20RA  | rs143005532 | 6  | 137009349 | T | C | 0.00 | 0.86  | 0.10 | 1.18E-08  |
| IL22RA1 | rs7355101   | 1  | 24124595  | T | A | 0.20 | -0.31 | 0.01 | 1.63E-105 |
| IL22RA1 | -           | 9  | 133263362 | G | A | 0.18 | -0.12 | 0.01 | 4.52E-17  |
| IL22RA1 | rs681343    | 19 | 48703205  | T | C | 0.51 | -0.15 | 0.01 | 3.84E-37  |
| IL2RA   | rs61747728  | 1  | 179557079 | T | C | 0.04 | 0.13  | 0.02 | 1.20E-06  |
| IL2RA   | rs734866    | 3  | 24434006  | C | A | 0.19 | 0.09  | 0.01 | 3.38E-11  |
| IL2RA   | rs3094005   | 6  | 31497270  | T | G | 0.14 | 0.12  | 0.01 | 2.79E-16  |
| IL2RA   | rs12722497  | 10 | 6053965   | A | C | 0.09 | 0.95  | 0.01 | 0.00E+00  |
| IL2RA   | rs7137828   | 12 | 111494996 | T | C | 0.52 | -0.08 | 0.01 | 2.71E-16  |
| IL2RA   | rs1955512   | 14 | 32706616  | A | G | 0.57 | 0.06  | 0.01 | 1.86E-09  |
| IL2RA   | rs924135    | 16 | 16029602  | T | A | 0.61 | -0.06 | 0.01 | 6.49E-09  |
| IL2RA   | rs2659007   | 17 | 81243678  | A | G | 0.45 | 0.06  | 0.01 | 7.55E-08  |
| IL32    | rs9272154   | 6  | 32633242  | A | G | 0.35 | 0.05  | 0.01 | 1.98E-05  |
| IL32    | rs117199990 | 8  | 19963405  | T | C | 0.10 | 0.10  | 0.01 | 2.09E-08  |
| IL32    | rs145920606 | 12 | 7474715   | G | A | 0.08 | 0.10  | 0.01 | 1.96E-06  |
| IL32    | rs12905732  | 15 | 58391343  | C | G | 0.20 | 0.09  | 0.01 | 1.21E-11  |
| IL32    | rs45499297  | 16 | 3065271   | C | T | 0.09 | -0.40 | 0.01 | 2.03E-97  |
| IL32    | rs247617    | 16 | 56956804  | A | C | 0.32 | 0.10  | 0.01 | 3.30E-18  |
| IL32    | rs429358    | 19 | 44908684  | C | T | 0.16 | 0.09  | 0.01 | 7.86E-09  |
| IL32    | rs12986064  | 19 | 54251270  | C | T | 0.51 | -0.07 | 0.01 | 1.42E-09  |
| IL32    | rs3747207   | 22 | 43928975  | A | G | 0.22 | 0.06  | 0.01 | 1.24E-05  |
| IL33    | rs143215670 | 9  | 6264551   | C | G | 0.00 | -0.38 | 0.06 | 2.05E-05  |
| IL34    | rs4985556   | 16 | 70660097  | A | C | 0.12 | -1.07 | 0.01 | 0.00E+00  |
| IL3RA   | rs876038    | 7  | 50268931  | T | C | 0.32 | -0.05 | 0.01 | 7.42E-06  |
| IL3RA   | -           | 9  | 133263362 | G | A | 0.18 | -0.59 | 0.01 | 0.00E+00  |
| IL3RA   | rs508487    | 11 | 117204850 | T | C | 0.06 | 0.10  | 0.01 | 2.33E-05  |
| IL3RA   | rs35458154  | 11 | 126426930 | A | G | 0.03 | 0.25  | 0.02 | 2.86E-13  |
| IL3RA   | rs186021206 | 17 | 7166093   | A | G | 0.01 | 0.75  | 0.05 | 3.45E-25  |
| IL4R    | rs10935473  | 3  | 98698056  | T | G | 0.44 | -0.05 | 0.01 | 2.08E-06  |
| IL4R    | rs541020703 | 7  | 34921504  | A | T | 0.32 | 0.13  | 0.01 | 2.72E-29  |
| IL4R    | rs2519093   | 9  | 133266456 | T | C | 0.18 | -0.08 | 0.01 | 4.02E-09  |
| IL4R    | rs149425950 | 12 | 20847698  | T | A | 0.15 | 0.08  | 0.01 | 2.59E-07  |
| IL4R    | rs28929474  | 14 | 94378610  | T | C | 0.02 | 0.47  | 0.03 | 4.27E-35  |
| IL4R    | rs8060025   | 16 | 27315893  | G | T | 0.61 | 0.31  | 0.01 | 5.53E-169 |
| IL4R    | rs186021206 | 17 | 7166093   | A | G | 0.01 | 0.64  | 0.05 | 3.31E-17  |
| IL5RA   | rs188468174 | 1  | 24965206  | T | C | 0.01 | -0.72 | 0.03 | 2.27E-61  |
| IL5RA   | rs77400868  | 3  | 3109280   | G | A | 0.13 | 0.51  | 0.01 | 3.70E-214 |
| IL5RA   | rs9819371   | 3  | 141487958 | T | C | 0.07 | -0.11 | 0.01 | 3.25E-06  |
| IL5RA   | rs9869437   | 3  | 196501489 | A | C | 0.35 | 0.08  | 0.01 | 2.04E-10  |
| IL5RA   | rs93059     | 4  | 102547361 | A | G | 0.44 | -0.05 | 0.01 | 5.89E-07  |
| IL5RA   | rs6810926   | 4  | 146047700 | G | A | 0.17 | 0.07  | 0.01 | 4.74E-08  |
| IL5RA   | rs561074184 | 5  | 95923240  | A | G | 0.26 | -0.06 | 0.01 | 6.26E-08  |
| IL5RA   | rs7705189   | 5  | 132287665 | G | A | 0.47 | -0.07 | 0.01 | 1.14E-10  |
| IL5RA   | rs3134745   | 6  | 31274985  | T | C | 0.33 | -0.12 | 0.01 | 3.19E-30  |
| IL5RA   | rs66867810  | 6  | 41973148  | A | G | 0.32 | -0.06 | 0.01 | 6.96E-07  |
| IL5RA   | -           | 6  | 139307965 | G | A | 0.41 | 0.06  | 0.01 | 5.41E-09  |
| IL5RA   | rs7758383   | 6  | 142848586 | G | A | 0.49 | -0.06 | 0.01 | 1.16E-07  |
| IL5RA   | rs7797255   | 7  | 50312008  | G | A | 0.40 | -0.07 | 0.01 | 1.59E-10  |
| IL5RA   | rs78740585  | 7  | 151247216 | A | G | 0.11 | 0.19  | 0.01 | 5.95E-34  |
| IL5RA   | rs2511713   | 8  | 102565637 | G | A | 0.26 | -0.06 | 0.01 | 4.31E-08  |
| IL5RA   | rs12342831  | 9  | 33124874  | C | T | 0.25 | -0.05 | 0.01 | 7.77E-06  |
| IL5RA   | rs968567    | 11 | 61828092  | T | C | 0.19 | 0.06  | 0.01 | 2.18E-05  |
| IL5RA   | rs10896045  | 11 | 65788053  | G | A | 0.70 | -0.05 | 0.01 | 4.67E-06  |
| IL5RA   | rs12880641  | 14 | 102785115 | G | T | 0.66 | -0.06 | 0.01 | 5.03E-08  |
| IL5RA   | rs71374030  | 16 | 30719197  | T | A | 0.74 | -0.09 | 0.01 | 2.35E-13  |



|       |             |    |           |   |   |      |       |      |          |
|-------|-------------|----|-----------|---|---|------|-------|------|----------|
| IL5RA | rs3803800   | 17 | 7559652   | G | A | 0.79 | -0.07 | 0.01 | 1.53E-08 |
| IL5RA | rs34562254  | 17 | 16939677  | A | G | 0.10 | 0.20  | 0.01 | 3.39E-30 |
| IL5RA | rs59716545  | 17 | 39875604  | G | T | 0.48 | -0.09 | 0.01 | 1.73E-17 |
| IL5RA | rs4794063   | 17 | 47727128  | T | C | 0.26 | -0.05 | 0.01 | 2.61E-05 |
| IL5RA | rs11085015  | 19 | 3369574   | G | T | 0.80 | -0.06 | 0.01 | 2.80E-05 |
| IL5RA | rs1005980   | 19 | 19160689  | G | C | 0.46 | -0.07 | 0.01 | 1.45E-12 |
| IL5RA | rs386812017 | 20 | 4989627   | T | G | 0.39 | 0.05  | 0.01 | 5.85E-07 |
| IL6   | rs55709272  | 2  | 113109711 | C | T | 0.44 | 0.05  | 0.01 | 2.26E-06 |
| IL6   | rs12133641  | 1  | 154455807 | G | A | 0.41 | 0.23  | 0.01 | 1.80E-92 |
| IL6   | rs7449585   | 6  | 32612814  | C | G | 0.27 | 0.08  | 0.01 | 8.91E-10 |
| IL6   | rs9977672   | 21 | 39091357  | A | G | 0.26 | -0.06 | 0.01 | 4.44E-06 |
| IL6R  | rs4129267   | 1  | 154453788 | T | C | 0.40 | 1.10  | 0.01 | 0.00E+00 |
| IL6R  | rs11757137  | 6  | 32552380  | T | C | 0.44 | 0.04  | 0.00 | 8.00E-07 |
| IL6R  | rs4055121   | 11 | 126362442 | T | C | 0.13 | -0.05 | 0.01 | 2.02E-06 |
| IL6R  | rs7137828   | 12 | 111494996 | T | C | 0.52 | -0.03 | 0.00 | 2.04E-05 |
| IL6R  | rs186021206 | 17 | 7166093   | A | G | 0.01 | 0.42  | 0.03 | 2.90E-17 |
| IL6R  | rs760482467 | 17 | 59791184  | C | T | 0.58 | 0.04  | 0.00 | 1.99E-07 |
| IL6R  | rs351988    | 19 | 815086    | G | A | 0.57 | 0.04  | 0.00 | 2.95E-06 |
| IL6ST | rs3791101   | 1  | 43900578  | A | G | 0.31 | 0.06  | 0.01 | 5.39E-06 |
| IL6ST | rs10935473  | 3  | 98698056  | T | G | 0.44 | -0.17 | 0.01 | 1.61E-55 |
| IL6ST | rs138283229 | 3  | 155828335 | T | C | 0.01 | 0.38  | 0.05 | 9.20E-07 |
| IL6ST | rs11739016  | 5  | 55967545  | T | C | 0.12 | 0.26  | 0.01 | 8.71E-52 |
| IL6ST | rs4721064   | 7  | 12244752  | A | G | 0.40 | 0.05  | 0.01 | 1.94E-05 |
| IL6ST | rs507666    | 9  | 133273983 | A | G | 0.18 | -0.21 | 0.01 | 2.18E-51 |
| IL6ST | rs11011672  | 10 | 19916136  | T | G | 0.70 | 0.06  | 0.01 | 2.97E-06 |
| IL6ST | rs3967200   | 11 | 126362490 | T | C | 0.13 | -0.15 | 0.01 | 1.31E-19 |
| IL6ST | rs7145500   | 14 | 65417494  | A | G | 0.67 | 0.05  | 0.01 | 1.99E-05 |
| IL6ST | rs186021206 | 17 | 7166093   | A | G | 0.01 | 1.21  | 0.05 | 4.19E-58 |
| IL6ST | rs77542162  | 17 | 69085137  | G | A | 0.02 | 0.16  | 0.02 | 2.63E-05 |
| IL6ST | rs11444782  | 20 | 3699816   | T | A | 0.56 | -0.06 | 0.01 | 1.22E-06 |
| IL6ST | rs2008174   | 22 | 39464125  | T | C | 0.74 | -0.08 | 0.01 | 8.38E-09 |
| IL7   | rs3804749   | 3  | 123114156 | T | C | 0.59 | -0.07 | 0.01 | 4.52E-08 |
| IL7   | rs11734132  | 4  | 6889792   | C | G | 0.17 | 0.07  | 0.01 | 2.62E-05 |
| IL7   | rs3207561   | 6  | 31268908  | G | A | 0.37 | 0.05  | 0.01 | 1.43E-05 |
| IL7   | -           | 8  | 78816116  | T | A | 0.10 | -0.18 | 0.01 | 5.60E-20 |
| IL7   | rs6993770   | 8  | 105569300 | T | A | 0.29 | -0.11 | 0.01 | 6.73E-17 |
| IL7R  | rs36053809  | 1  | 26756602  | C | A | 0.08 | -0.08 | 0.01 | 3.43E-06 |
| IL7R  | rs3791101   | 1  | 43900578  | A | G | 0.31 | 0.06  | 0.01 | 1.37E-08 |
| IL7R  | rs9850919   | 3  | 169460136 | T | C | 0.59 | 0.05  | 0.01 | 9.51E-08 |
| IL7R  | rs13071610  | 3  | 186955149 | A | G | 0.12 | -0.06 | 0.01 | 2.28E-05 |
| IL7R  | rs6897932   | 5  | 35874473  | T | C | 0.27 | -0.88 | 0.01 | 0.00E+00 |
| IL7R  | rs12189871  | 6  | 31284147  | T | C | 0.09 | 0.16  | 0.01 | 1.47E-25 |
| IL7R  | rs170622    | 7  | 34992488  | T | C | 0.21 | -0.05 | 0.01 | 1.58E-06 |
| IL7R  | rs2519093   | 9  | 133266456 | T | C | 0.18 | -0.59 | 0.01 | 0.00E+00 |
| IL7R  | rs1059091   | 11 | 309127    | G | A | 0.32 | -0.04 | 0.01 | 7.28E-06 |
| IL7R  | rs35166255  | 11 | 126431861 | A | G | 0.03 | 0.47  | 0.02 | 1.78E-82 |
| IL7R  | rs186021206 | 17 | 7166093   | A | G | 0.01 | 1.11  | 0.04 | 6.19E-77 |
| IL7R  | rs11083619  | 19 | 41407362  | C | A | 0.61 | 0.06  | 0.01 | 1.16E-12 |
| ILKAP | rs6993770   | 8  | 105569300 | T | A | 0.29 | -0.06 | 0.01 | 1.28E-06 |
| ILKAP | rs60822569  | 12 | 54323724  | C | T | 0.55 | 0.05  | 0.01 | 1.43E-05 |
| IMPA1 | rs342293    | 7  | 106731773 | G | C | 0.46 | -0.05 | 0.01 | 2.79E-05 |
| IMPA1 | rs1967328   | 8  | 81671536  | T | G | 0.30 | -0.21 | 0.01 | 4.14E-67 |
| ING1  | rs6993770   | 8  | 105569300 | T | A | 0.29 | -0.06 | 0.01 | 1.15E-05 |
| INHBC | rs1730858   | 1  | 107076622 | C | T | 0.65 | 0.05  | 0.01 | 2.16E-06 |
| INHBC | rs1260326   | 2  | 27508073  | C | T | 0.61 | -0.06 | 0.01 | 1.79E-08 |
| INHBC | rs204893    | 6  | 32126816  | C | T | 0.43 | 0.05  | 0.01 | 9.15E-06 |

|        |             |    |           |   |   |      |       |      |          |
|--------|-------------|----|-----------|---|---|------|-------|------|----------|
| INHBC  | rs7896518   | 10 | 63344740  | G | A | 0.42 | -0.06 | 0.01 | 1.56E-07 |
| INHBC  | rs3741414   | 12 | 57450266  | T | C | 0.25 | -0.65 | 0.01 | 0.00E+00 |
| INHBC  | rs28929474  | 14 | 94378610  | T | C | 0.02 | 0.19  | 0.02 | 4.24E-07 |
| INPP1  | rs141472596 | 2  | 190286791 | G | A | 0.00 | -1.53 | 0.10 | 1.93E-22 |
| INPP1  | rs342293    | 7  | 106731773 | G | C | 0.46 | -0.05 | 0.01 | 6.05E-06 |
| INPP1  | rs3847326   | 10 | 63572099  | G | A | 0.48 | -0.05 | 0.01 | 2.62E-05 |
| IPCEF1 | rs1354034   | 3  | 56815721  | C | T | 0.60 | 0.06  | 0.01 | 3.62E-08 |
| IPCEF1 | rs2499649   | 6  | 154354781 | C | T | 0.31 | -0.09 | 0.01 | 2.03E-12 |
| IQGAP2 | rs10037254  | 5  | 76634815  | A | G | 0.60 | 0.15  | 0.01 | 1.36E-36 |
| IRAG2  | rs7080536   | 10 | 113588287 | A | G | 0.04 | -0.13 | 0.02 | 4.96E-06 |
| IRAG2  | rs72932837  | 11 | 65109268  | T | C | 0.24 | -0.08 | 0.01 | 1.49E-08 |
| IRAK1  | rs1354034   | 3  | 56815721  | C | T | 0.60 | 0.06  | 0.01 | 1.14E-06 |
| IRAK4  | -           | 10 | 63156270  | A | T | 0.49 | 0.05  | 0.01 | 1.89E-05 |
| IRAK4  | rs183549317 | 12 | 43736640  | A | G | 0.00 | -1.09 | 0.13 | 2.88E-08 |
| ISLR2  | rs35518360  | 4  | 102225733 | T | A | 0.08 | 0.09  | 0.01 | 4.76E-06 |
| ISLR2  | rs9263451   | 6  | 31072711  | A | C | 0.10 | -0.07 | 0.01 | 2.47E-05 |
| ISLR2  | rs2519093   | 9  | 133266456 | T | C | 0.18 | -0.65 | 0.01 | 0.00E+00 |
| ISLR2  | rs60843925  | 11 | 126368937 | C | T | 0.14 | -0.14 | 0.01 | 2.46E-18 |
| ISLR2  | rs34868798  | 15 | 74177375  | C | T | 0.22 | 0.25  | 0.01 | 1.64E-83 |
| ISLR2  | rs142359784 | 16 | 67352232  | T | C | 0.04 | -0.12 | 0.02 | 9.55E-06 |
| ISLR2  | rs186021206 | 17 | 7166093   | A | G | 0.01 | 0.96  | 0.05 | 3.03E-41 |
| ISLR2  | rs4802117   | 19 | 41404712  | A | G | 0.61 | 0.06  | 0.01 | 3.11E-08 |
| ISM1   | rs539657009 | 1  | 161658666 | T | C | 0.13 | 0.08  | 0.01 | 1.10E-05 |
| ISM1   | rs7641117   | 3  | 194343614 | G | C | 0.67 | 0.06  | 0.01 | 9.83E-07 |
| ISM1   | -           | 4  | 186236113 | C | A | 0.51 | -0.07 | 0.01 | 4.67E-09 |
| ISM1   | -           | 10 | 63184239  | A | T | 0.44 | 0.05  | 0.01 | 2.29E-05 |
| ISM1   | rs1998123   | 20 | 13495237  | G | A | 0.70 | -0.19 | 0.01 | 1.25E-53 |
| ITGA11 | rs1260326   | 2  | 27508073  | C | T | 0.61 | 0.06  | 0.01 | 6.12E-08 |
| ITGA11 | -           | 10 | 63464698  | C | A | 0.52 | 0.06  | 0.01 | 1.67E-07 |
| ITGA11 | rs7927820   | 11 | 116811440 | A | G | 0.88 | -0.12 | 0.01 | 5.39E-12 |
| ITGA11 | rs35887873  | 11 | 126349501 | C | T | 0.23 | 0.12  | 0.01 | 6.77E-20 |
| ITGA11 | rs753768034 | 15 | 58389334  | T | G | 0.62 | -0.07 | 0.01 | 6.98E-10 |
| ITGA11 | rs2306022   | 15 | 68335825  | T | C | 0.09 | -0.36 | 0.01 | 5.31E-76 |
| ITGA11 | rs186021206 | 17 | 7166093   | A | G | 0.01 | 0.81  | 0.05 | 4.48E-27 |
| ITGA11 | -           | 20 | 45927136  | G | C | 0.15 | -0.08 | 0.01 | 1.67E-07 |
| ITGA5  | rs539657009 | 1  | 161658666 | T | C | 0.13 | 0.09  | 0.01 | 4.83E-08 |
| ITGA5  | rs2124440   | 2  | 181463487 | A | G | 0.56 | 0.06  | 0.01 | 1.85E-07 |
| ITGA5  | rs139078629 | 2  | 215386815 | A | G | 0.01 | -0.67 | 0.04 | 9.39E-33 |
| ITGA5  | rs62246443  | 3  | 47130917  | C | T | 0.18 | -0.07 | 0.01 | 8.62E-06 |
| ITGA5  | rs78776915  | 6  | 32501603  | T | C | 0.42 | 0.07  | 0.01 | 1.02E-07 |
| ITGA5  | rs41341748  | 8  | 16155085  | A | G | 0.01 | 0.24  | 0.03 | 9.08E-06 |
| ITGA5  | rs8176746   | 9  | 133255935 | T | G | 0.06 | 0.22  | 0.01 | 1.38E-22 |
| ITGA5  | rs10748526  | 10 | 80513323  | C | T | 0.79 | 0.12  | 0.01 | 3.77E-17 |
| ITGA5  | rs199991349 | 11 | 58610344  | A | C | 0.01 | 0.22  | 0.03 | 7.94E-06 |
| ITGA5  | rs3184504   | 12 | 111446804 | C | T | 0.52 | -0.11 | 0.01 | 6.67E-22 |
| ITGA5  | rs7161799   | 15 | 58478324  | T | C | 0.08 | 0.09  | 0.01 | 2.71E-05 |
| ITGA5  | rs186021206 | 17 | 7166093   | A | G | 0.01 | 0.71  | 0.05 | 4.54E-21 |
| ITGA5  | rs7288265   | 22 | 44027516  | A | G | 0.33 | -0.07 | 0.01 | 3.81E-10 |
| ITGA6  | rs6714597   | 2  | 172473758 | C | T | 0.31 | 0.23  | 0.01 | 3.82E-79 |
| ITGA6  | rs710446    | 3  | 186742138 | C | T | 0.41 | 0.07  | 0.01 | 1.59E-10 |
| ITGA6  | rs4861708   | 4  | 186236079 | A | G | 0.51 | 0.17  | 0.01 | 8.54E-50 |
| ITGA6  | rs2897457   | 5  | 53056546  | T | G | 0.49 | -0.12 | 0.01 | 2.33E-27 |
| ITGA6  | rs2731673   | 5  | 177412897 | C | T | 0.74 | 0.08  | 0.01 | 1.02E-10 |
| ITGA6  | rs67612510  | 6  | 32558659  | A | G | 0.54 | -0.06 | 0.01 | 1.06E-05 |
| ITGA6  | rs579459    | 9  | 133278724 | C | T | 0.21 | -0.10 | 0.01 | 1.50E-13 |
| ITGA6  | -           | 10 | 63156270  | A | T | 0.49 | 0.06  | 0.01 | 4.15E-07 |

|          |             |    |           |   |   |      |       |      |           |
|----------|-------------|----|-----------|---|---|------|-------|------|-----------|
| ITGA6    | -           | 11 | 1778277   | A | G | 0.09 | -0.10 | 0.01 | 5.80E-07  |
| ITGA6    | rs1362213   | 12 | 6173262   | T | C | 0.48 | -0.05 | 0.01 | 8.43E-06  |
| ITGAM    | rs10164604  | 2  | 134296795 | A | T | 0.90 | 0.08  | 0.01 | 1.12E-05  |
| ITGAM    | rs118162691 | 8  | 21910298  | A | C | 0.04 | 0.14  | 0.02 | 4.28E-07  |
| ITGAM    | rs7865362   | 9  | 33117967  | T | C | 0.36 | 0.11  | 0.01 | 2.17E-20  |
| ITGAM    | rs4601794   | 11 | 126375250 | G | A | 0.06 | -0.12 | 0.02 | 1.73E-06  |
| ITGAM    | rs3184504   | 12 | 111446804 | C | T | 0.52 | -0.06 | 0.01 | 6.29E-07  |
| ITGAM    | rs11150613  | 16 | 31346489  | T | C | 0.68 | 0.16  | 0.01 | 1.27E-41  |
| ITGAM    | rs776419906 | 16 | 48401235  | A | G | 0.00 | -1.04 | 0.12 | 3.21E-08  |
| ITGAM    | rs186021206 | 17 | 7166093   | A | G | 0.01 | 1.01  | 0.05 | 2.43E-40  |
| ITGAM    | rs4804774   | 19 | 7707287   | C | G | 0.24 | 0.08  | 0.01 | 1.94E-09  |
| ITGAM    | rs2230531   | 21 | 44888885  | T | C | 0.01 | 0.50  | 0.04 | 5.34E-15  |
| ITGAV    | rs61801010  | 1  | 161572445 | G | A | 0.11 | 0.08  | 0.01 | 2.02E-05  |
| ITGAV    | rs2595391   | 2  | 186667646 | G | T | 0.11 | 0.23  | 0.01 | 3.80E-40  |
| ITGAV    | rs112771035 | 11 | 126355981 | G | C | 0.07 | -0.11 | 0.01 | 9.89E-08  |
| ITGAV    | rs111338191 | 12 | 111388673 | T | A | 0.52 | 0.05  | 0.01 | 8.45E-07  |
| ITGAV    | rs17580     | 14 | 94380925  | A | T | 0.05 | 0.12  | 0.02 | 1.55E-06  |
| ITGAV    | rs186021206 | 17 | 7166093   | A | G | 0.01 | 0.87  | 0.05 | 4.50E-32  |
| ITGAV    | rs2868346   | 20 | 45919331  | T | C | 0.76 | -0.05 | 0.01 | 2.34E-05  |
| ITGB1    | -           | 1  | 92568371  | C | T | 0.79 | 0.06  | 0.01 | 2.14E-05  |
| ITGB1    | rs246411    | 5  | 52980628  | C | T | 0.32 | 0.10  | 0.01 | 2.14E-17  |
| ITGB1    | rs4841132   | 8  | 9326086   | G | A | 0.91 | -0.09 | 0.01 | 1.16E-05  |
| ITGB1    | rs507666    | 9  | 133273983 | A | G | 0.18 | -0.11 | 0.01 | 2.83E-14  |
| ITGB1    | rs7924036   | 10 | 63431885  | T | G | 0.50 | 0.05  | 0.01 | 6.29E-06  |
| ITGB1    | rs60843925  | 11 | 126368937 | C | T | 0.14 | -0.13 | 0.01 | 9.37E-16  |
| ITGB1    | rs186021206 | 17 | 7166093   | A | G | 0.01 | 1.09  | 0.05 | 1.73E-48  |
| ITGB1    | rs2413593   | 22 | 39476122  | G | A | 0.49 | 0.05  | 0.01 | 5.38E-06  |
| ITGB1BP2 | rs2631367   | 5  | 132369766 | G | C | 0.52 | 0.05  | 0.01 | 9.92E-06  |
| ITGB1BP2 | rs342298    | 7  | 106733200 | T | C | 0.46 | -0.10 | 0.01 | 6.47E-17  |
| ITGB1BP2 | rs11553699  | 12 | 121779004 | G | A | 0.14 | -0.10 | 0.01 | 1.19E-08  |
| ITGB1BP2 | rs13338372  | 16 | 8944922   | G | A | 0.19 | -0.06 | 0.01 | 1.89E-05  |
| ITGB1BP2 | rs200309755 | 17 | 29518756  | T | C | 0.54 | 0.05  | 0.01 | 1.95E-05  |
| ITGB2    | -           | 1  | 161704318 | G | A | 0.11 | 0.08  | 0.01 | 2.17E-05  |
| ITGB2    | rs9784005   | 2  | 68348488  | A | T | 0.44 | 0.05  | 0.01 | 2.69E-05  |
| ITGB2    | rs7433300   | 3  | 47079150  | A | G | 0.62 | -0.05 | 0.01 | 1.92E-05  |
| ITGB2    | rs118162691 | 8  | 21910298  | A | C | 0.04 | 0.14  | 0.02 | 4.17E-07  |
| ITGB2    | rs7865362   | 9  | 33117967  | T | C | 0.36 | 0.09  | 0.01 | 7.76E-14  |
| ITGB2    | rs56278466  | 10 | 17833858  | G | T | 0.66 | 0.07  | 0.01 | 2.10E-08  |
| ITGB2    | rs75071241  | 11 | 126362291 | A | G | 0.06 | -0.12 | 0.02 | 3.23E-07  |
| ITGB2    | rs3184504   | 12 | 111446804 | C | T | 0.52 | -0.12 | 0.01 | 1.21E-29  |
| ITGB2    | rs11574639  | 16 | 31360760  | A | G | 0.68 | 0.12  | 0.01 | 6.86E-24  |
| ITGB2    | rs776419906 | 16 | 48401235  | A | G | 0.00 | -0.99 | 0.12 | 9.51E-08  |
| ITGB2    | rs186021206 | 17 | 7166093   | A | G | 0.01 | 1.11  | 0.05 | 2.90E-49  |
| ITGB2    | rs57543961  | 17 | 35475912  | T | C | 0.42 | -0.05 | 0.01 | 2.02E-05  |
| ITGB2    | rs760462    | 21 | 44908184  | C | T | 0.82 | 0.15  | 0.01 | 2.60E-25  |
| ITGB5    | rs35986780  | 2  | 186724153 | G | A | 0.30 | -0.06 | 0.01 | 1.70E-06  |
| ITGB5    | rs1354034   | 3  | 56815721  | C | T | 0.60 | 0.08  | 0.01 | 1.69E-11  |
| ITGB5    | rs144195265 | 3  | 124790520 | A | G | 0.03 | 0.22  | 0.02 | 5.79E-12  |
| ITGB5    | rs56399423  | 5  | 132336964 | C | T | 0.43 | -0.05 | 0.01 | 1.24E-05  |
| ITGB5    | rs7896518   | 10 | 63344740  | G | A | 0.42 | 0.09  | 0.01 | 2.43E-15  |
| ITGB5    | rs139130389 | 11 | 72139110  | A | C | 0.07 | -0.43 | 0.01 | 8.99E-92  |
| ITGB5    | rs186021206 | 17 | 7166093   | A | G | 0.01 | 0.51  | 0.05 | 1.65E-11  |
| ITGB6    | rs6432601   | 2  | 160121432 | G | A | 0.69 | 0.29  | 0.01 | 8.62E-134 |
| ITGB6    | rs13107325  | 4  | 102267552 | T | C | 0.07 | -0.14 | 0.01 | 4.01E-11  |
| ITGB6    | rs77041499  | 4  | 109443812 | G | A | 0.01 | 0.34  | 0.04 | 2.19E-07  |
| ITGB6    | -           | 8  | 60642852  | C | T | 0.24 | 0.07  | 0.01 | 3.15E-08  |

|        |             |    |           |   |   |      |       |      |           |
|--------|-------------|----|-----------|---|---|------|-------|------|-----------|
| ITGB6  | rs11414746  | 9  | 33150411  | A | T | 0.42 | 0.06  | 0.01 | 9.12E-08  |
| ITGB6  | rs57994353  | 9  | 136462535 | C | T | 0.30 | 0.08  | 0.01 | 3.95E-11  |
| ITGB6  | rs56278466  | 10 | 17833858  | G | T | 0.66 | 0.05  | 0.01 | 2.91E-06  |
| ITGB6  | rs7310615   | 12 | 111427245 | G | C | 0.52 | 0.05  | 0.01 | 8.48E-07  |
| ITGB6  | rs75348693  | 14 | 49565212  | A | G | 0.55 | 0.06  | 0.01 | 3.03E-09  |
| ITGB6  | rs7203746   | 16 | 4206062   | G | A | 0.28 | 0.07  | 0.01 | 4.59E-08  |
| ITGB6  | rs77542162  | 17 | 69085137  | G | A | 0.02 | 0.20  | 0.02 | 2.64E-08  |
| ITGB7  | rs37454     | 1  | 43828739  | A | C | 0.35 | 0.17  | 0.01 | 4.19E-54  |
| ITGB7  | rs343808    | 1  | 110787385 | T | C | 0.24 | 0.06  | 0.01 | 8.92E-06  |
| ITGB7  | rs6759003   | 2  | 62332070  | C | T | 0.64 | 0.08  | 0.01 | 1.91E-11  |
| ITGB7  | rs62168051  | 2  | 134325432 | G | C | 0.16 | 0.21  | 0.01 | 1.18E-47  |
| ITGB7  | rs6771051   | 3  | 170006440 | T | G | 0.46 | -0.11 | 0.01 | 7.59E-23  |
| ITGB7  | rs4686445   | 3  | 186909819 | C | T | 0.32 | -0.13 | 0.01 | 1.60E-29  |
| ITGB7  | rs764264929 | 4  | 99163742  | T | C | 0.46 | -0.05 | 0.01 | 1.12E-05  |
| ITGB7  | rs9272209   | 6  | 32634200  | C | A | 0.15 | 0.10  | 0.01 | 7.26E-11  |
| ITGB7  | rs6796      | 7  | 6462736   | C | T | 0.28 | 0.07  | 0.01 | 4.69E-09  |
| ITGB7  | rs6955795   | 7  | 150811537 | G | C | 0.45 | 0.05  | 0.01 | 7.35E-07  |
| ITGB7  | rs9987289   | 8  | 9325848   | G | A | 0.91 | -0.08 | 0.01 | 8.69E-06  |
| ITGB7  | rs7849148   | 9  | 33138354  | T | A | 0.31 | 0.07  | 0.01 | 3.10E-09  |
| ITGB7  | rs635634    | 9  | 133279427 | T | C | 0.18 | 0.11  | 0.01 | 2.52E-14  |
| ITGB7  | rs78689694  | 11 | 126364925 | C | G | 0.13 | -0.15 | 0.01 | 7.92E-21  |
| ITGB7  | rs12232003  | 12 | 53199848  | C | T | 0.07 | 0.18  | 0.01 | 2.58E-19  |
| ITGB7  | rs10774625  | 12 | 111472415 | G | A | 0.50 | -0.05 | 0.01 | 1.53E-06  |
| ITGB7  | rs7161799   | 15 | 58478324  | T | C | 0.08 | 0.14  | 0.01 | 2.57E-12  |
| ITGB7  | rs2325756   | 17 | 3727327   | A | G | 0.55 | -0.35 | 0.01 | 4.12E-222 |
| ITGB7  | rs186021206 | 17 | 7166093   | A | G | 0.01 | 1.81  | 0.05 | 8.46E-126 |
| ITGB7  | rs2659005   | 17 | 81244914  | T | C | 0.44 | 0.09  | 0.01 | 2.67E-14  |
| ITIH3  | rs1260326   | 2  | 27508073  | C | T | 0.61 | -0.05 | 0.01 | 3.41E-06  |
| ITIH3  | rs9881468   | 3  | 52794612  | T | C | 0.34 | 0.31  | 0.01 | 6.96E-164 |
| ITIH3  | rs35656703  | 3  | 126539442 | A | C | 0.25 | -0.20 | 0.01 | 3.72E-62  |
| ITIH3  | rs244451    | 5  | 129891684 | C | T | 0.68 | -0.08 | 0.01 | 1.49E-13  |
| ITIH3  | rs35246381  | 8  | 18415025  | T | C | 0.78 | 0.06  | 0.01 | 2.54E-06  |
| ITIH3  | rs10808546  | 8  | 125483576 | T | C | 0.45 | 0.06  | 0.01 | 5.45E-08  |
| ITIH3  | rs3751198   | 12 | 103753429 | G | A | 0.60 | 0.05  | 0.01 | 1.37E-06  |
| ITM2A  | rs9264683   | 6  | 31273163  | T | A | 0.17 | -0.10 | 0.01 | 2.75E-10  |
| ITM2A  | rs709932    | 14 | 94382864  | T | C | 0.15 | -0.30 | 0.01 | 6.64E-80  |
| ITM2A  | rs756845    | 19 | 35172347  | G | A | 0.78 | -0.08 | 0.01 | 3.82E-08  |
| JAM2   | rs3811444   | 1  | 247876149 | T | C | 0.33 | 0.15  | 0.01 | 2.44E-40  |
| JAM2   | rs1260326   | 2  | 27508073  | C | T | 0.61 | 0.05  | 0.01 | 9.97E-06  |
| JAM2   | rs8176741   | 9  | 133256074 | A | G | 0.06 | 0.24  | 0.01 | 1.82E-26  |
| JAM2   | rs764351876 | 10 | 63247110  | A | C | 0.34 | 0.06  | 0.01 | 6.95E-06  |
| JAM2   | rs12277151  | 11 | 134103559 | T | C | 0.08 | -0.10 | 0.01 | 5.81E-07  |
| JAM2   | rs3184504   | 12 | 111446804 | C | T | 0.52 | 0.05  | 0.01 | 2.28E-06  |
| JAM2   | rs36060036  | 16 | 20350628  | T | C | 0.17 | -0.08 | 0.01 | 7.21E-08  |
| JAM2   | -           | 21 | 25542219  | C | A | 0.05 | 0.16  | 0.02 | 5.71E-10  |
| JCHAIN | rs188468174 | 1  | 24965206  | T | C | 0.01 | 0.35  | 0.03 | 1.35E-12  |
| JCHAIN | -           | 1  | 157830356 | T | C | 0.46 | -0.07 | 0.01 | 1.87E-09  |
| JCHAIN | -           | 1  | 160740283 | T | A | 0.67 | 0.05  | 0.01 | 1.36E-05  |
| JCHAIN | rs139015452 | 2  | 111050019 | G | C | 0.23 | -0.07 | 0.01 | 4.99E-07  |
| JCHAIN | rs617119    | 3  | 32414275  | T | C | 0.51 | 0.06  | 0.01 | 2.53E-07  |
| JCHAIN | rs116446171 | 6  | 484453    | G | C | 0.02 | 0.21  | 0.03 | 3.75E-07  |
| JCHAIN | rs1264457   | 6  | 30490287  | A | G | 0.61 | -0.08 | 0.01 | 2.91E-11  |
| JCHAIN | rs62445869  | 7  | 50409913  | A | G | 0.27 | -0.06 | 0.01 | 9.59E-06  |
| JCHAIN | rs4872089   | 8  | 23218821  | G | T | 0.24 | -0.06 | 0.01 | 1.17E-05  |
| JCHAIN | rs2511710   | 8  | 102563721 | T | G | 0.26 | -0.09 | 0.01 | 5.49E-11  |
| JCHAIN | rs9658720   | 10 | 89000912  | G | T | 0.55 | -0.06 | 0.01 | 4.08E-07  |

|         |             |    |           |   |   |      |       |      |           |
|---------|-------------|----|-----------|---|---|------|-------|------|-----------|
| JCHAIN  | rs36051450  | 11 | 123474251 | C | T | 0.20 | 0.09  | 0.01 | 5.26E-09  |
| JCHAIN  | rs117972357 | 14 | 95577209  | A | G | 0.00 | 0.51  | 0.08 | 1.70E-05  |
| JCHAIN  | rs3803286   | 14 | 102780133 | G | A | 0.67 | -0.05 | 0.01 | 2.08E-05  |
| JCHAIN  | rs885107    | 16 | 30661398  | C | T | 0.26 | 0.08  | 0.01 | 1.55E-10  |
| JCHAIN  | -           | 17 | 7586439   | T | A | 0.05 | 0.14  | 0.02 | 2.46E-07  |
| JCHAIN  | rs4815598   | 20 | 3720778   | C | G | 0.54 | 0.05  | 0.01 | 2.92E-06  |
| KAZALD1 | rs66782572  | 3  | 52533601  | G | A | 0.54 | 0.06  | 0.01 | 1.04E-08  |
| KAZALD1 | rs2228243   | 3  | 186677324 | G | A | 0.20 | -0.22 | 0.01 | 6.74E-64  |
| KAZALD1 | rs3731211   | 9  | 21986848  | A | T | 0.72 | -0.06 | 0.01 | 8.20E-08  |
| KAZALD1 | -           | 9  | 133274293 | A | C | 0.18 | -0.07 | 0.01 | 4.82E-07  |
| KAZALD1 | rs11190812  | 10 | 101064535 | A | G | 0.04 | -1.69 | 0.02 | 0.00E+00  |
| KAZALD1 | rs3751198   | 12 | 103753429 | G | A | 0.60 | 0.05  | 0.01 | 3.76E-06  |
| KAZALD1 | rs35350651  | 12 | 111469627 | C | A | 0.50 | -0.07 | 0.01 | 1.35E-10  |
| KDR     | rs6727115   | 2  | 62389406  | C | T | 0.19 | -0.06 | 0.01 | 8.86E-07  |
| KDR     | rs10935473  | 3  | 98698056  | T | G | 0.44 | -0.16 | 0.01 | 5.68E-55  |
| KDR     | rs34231037  | 4  | 55106779  | G | A | 0.03 | -1.32 | 0.02 | 0.00E+00  |
| KDR     | rs9267947   | 6  | 32243441  | G | A | 0.48 | -0.07 | 0.01 | 4.06E-12  |
| KDR     | rs932589    | 6  | 136762000 | T | C | 0.40 | -0.06 | 0.01 | 1.18E-07  |
| KDR     | rs7012814   | 8  | 9315848   | A | G | 0.47 | -0.05 | 0.01 | 5.54E-06  |
| KDR     | rs201102287 | 8  | 104962043 | G | A | 0.19 | 0.06  | 0.01 | 2.11E-05  |
| KDR     | -           | 9  | 133263362 | G | A | 0.18 | -0.48 | 0.01 | 6.34E-291 |
| KDR     | rs2031610   | 10 | 88994730  | C | T | 0.36 | -0.05 | 0.01 | 1.20E-06  |
| KDR     | rs139130389 | 11 | 72139110  | A | C | 0.07 | -0.14 | 0.01 | 1.40E-12  |
| KDR     | rs17625540  | 11 | 95451191  | A | G | 0.30 | -0.05 | 0.01 | 2.49E-05  |
| KDR     | rs35166255  | 11 | 126431861 | A | G | 0.03 | 0.25  | 0.02 | 1.77E-19  |
| KDR     | rs215225    | 12 | 481379    | G | A | 0.43 | -0.06 | 0.01 | 2.20E-09  |
| KDR     | rs146261845 | 17 | 7108935   | T | C | 0.01 | 0.40  | 0.04 | 7.55E-10  |
| KEL     | rs28594470  | 1  | 25409808  | T | A | 0.42 | -0.05 | 0.01 | 4.00E-06  |
| KEL     | rs2285170   | 1  | 172456389 | G | C | 0.50 | -0.05 | 0.01 | 8.87E-06  |
| KEL     | rs1427407   | 2  | 60490908  | G | T | 0.85 | -0.15 | 0.01 | 4.36E-28  |
| KEL     | rs35271699  | 2  | 218252759 | A | G | 0.50 | -0.04 | 0.01 | 2.75E-05  |
| KEL     | rs35852078  | 3  | 186937047 | A | G | 0.58 | -0.31 | 0.01 | 9.66E-203 |
| KEL     | rs11752051  | 6  | 2379263   | A | G | 0.49 | 0.07  | 0.01 | 9.74E-12  |
| KEL     | rs8176059   | 7  | 142954267 | A | G | 0.01 | -1.25 | 0.03 | 1.93E-149 |
| KEL     | rs34009363  | 8  | 97689464  | A | T | 0.06 | -0.09 | 0.01 | 1.15E-05  |
| KEL     | rs183332045 | 8  | 143616297 | T | G | 0.01 | -0.33 | 0.04 | 9.70E-08  |
| KEL     | rs2519093   | 9  | 133266456 | T | C | 0.18 | -0.42 | 0.01 | 6.46E-226 |
| KEL     | rs17476364  | 10 | 69334748  | C | T | 0.11 | 0.07  | 0.01 | 4.59E-06  |
| KEL     | rs201519335 | 11 | 16218217  | T | C | 0.08 | 0.09  | 0.01 | 1.52E-06  |
| KEL     | rs4055121   | 11 | 126362442 | T | C | 0.13 | -0.10 | 0.01 | 4.76E-11  |
| KEL     | rs35350651  | 12 | 111469627 | C | A | 0.50 | -0.05 | 0.01 | 6.06E-07  |
| KEL     | rs11630124  | 15 | 50723716  | A | T | 0.02 | 0.22  | 0.02 | 8.95E-11  |
| KEL     | rs186021206 | 17 | 7166093   | A | G | 0.01 | 1.34  | 0.04 | 1.28E-86  |
| KEL     | rs8887      | 19 | 4502189   | C | T | 0.57 | -0.07 | 0.01 | 1.51E-10  |
| KEL     | rs492602    | 19 | 48703160  | G | A | 0.51 | 0.06  | 0.01 | 2.64E-09  |
| KEL     | rs6014993   | 20 | 57416581  | G | A | 0.49 | 0.05  | 0.01 | 1.63E-07  |
| KIFBP   | rs1354034   | 3  | 56815721  | C | T | 0.60 | 0.11  | 0.01 | 2.61E-21  |
| KIFBP   | rs342293    | 7  | 106731773 | G | C | 0.46 | -0.08 | 0.01 | 4.40E-13  |
| KIFBP   | -           | 10 | 63156270  | A | T | 0.49 | 0.06  | 0.01 | 2.82E-07  |
| KIFBP   | rs11502185  | 11 | 180258    | C | T | 0.26 | 0.07  | 0.01 | 3.43E-06  |
| KIFBP   | rs58603603  | 15 | 63850409  | G | A | 0.08 | -0.10 | 0.01 | 8.42E-06  |
| KIR2DL3 | rs1050451   | 6  | 31272025  | G | C | 0.65 | -0.54 | 0.01 | 0.00E+00  |
| KIR2DL3 | rs35522829  | 12 | 10489694  | T | G | 0.12 | -0.09 | 0.01 | 2.49E-09  |
| KIR2DL3 | rs7137828   | 12 | 111494996 | T | C | 0.52 | -0.07 | 0.01 | 7.20E-13  |
| KIR2DL3 | rs16985907  | 19 | 54735345  | C | G | 0.04 | -0.87 | 0.02 | 1.04E-218 |
| KIR3DL1 | rs9259983   | 6  | 29936626  | A | C | 0.03 | 0.53  | 0.01 | 8.07E-136 |

|         |             |    |           |   |   |      |       |      |           |
|---------|-------------|----|-----------|---|---|------|-------|------|-----------|
| KIR3DL1 | rs9916257   | 17 | 35470352  | T | G | 0.44 | -0.03 | 0.00 | 1.48E-05  |
| KIR3DL1 | rs12150998  | 19 | 54831584  | G | A | 0.56 | -0.92 | 0.01 | 0.00E+00  |
| KIRREL2 | -           | 6  | 7113135   | C | T | 0.55 | 0.06  | 0.01 | 5.97E-07  |
| KIRREL2 | rs6571015   | 6  | 96086602  | A | G | 0.79 | 0.15  | 0.01 | 1.17E-28  |
| KIRREL2 | rs8176746   | 9  | 133255935 | T | G | 0.06 | 0.54  | 0.02 | 2.64E-121 |
| KIRREL2 | rs421195    | 16 | 283146    | T | C | 0.11 | -0.30 | 0.01 | 9.78E-64  |
| KIRREL2 | rs8051363   | 16 | 75221319  | G | A | 0.71 | -0.11 | 0.01 | 3.30E-17  |
| KIRREL2 | rs1673931   | 16 | 88910069  | C | T | 0.38 | 0.07  | 0.01 | 4.36E-09  |
| KIRREL2 | rs186021206 | 17 | 7166093   | A | G | 0.01 | 0.50  | 0.05 | 8.53E-11  |
| KIRREL2 | rs404299    | 19 | 35858850  | A | G | 0.03 | -0.46 | 0.02 | 1.29E-49  |
| KIRREL2 | rs2548458   | 19 | 48706068  | T | C | 0.54 | -0.07 | 0.01 | 3.49E-09  |
| KIT     | rs115340020 | 1  | 92300881  | A | G | 0.03 | -0.17 | 0.02 | 2.13E-07  |
| KIT     | rs2884425   | 1  | 234558737 | T | C | 0.49 | -0.07 | 0.01 | 3.57E-10  |
| KIT     | rs74227709  | 1  | 247559286 | A | G | 0.07 | 0.16  | 0.01 | 4.99E-14  |
| KIT     | rs72853300  | 2  | 144881199 | T | C | 0.16 | 0.07  | 0.01 | 1.41E-05  |
| KIT     | rs12470153  | 2  | 222291192 | C | G | 0.66 | -0.06 | 0.01 | 1.87E-06  |
| KIT     | rs6795463   | 3  | 69796957  | T | G | 0.43 | -0.06 | 0.01 | 6.09E-08  |
| KIT     | rs6440573   | 3  | 148890132 | G | C | 0.95 | 0.25  | 0.02 | 2.73E-23  |
| KIT     | rs9839302   | 3  | 198068553 | C | T | 0.30 | -0.08 | 0.01 | 2.28E-11  |
| KIT     | rs218263    | 4  | 54541937  | T | C | 0.12 | -0.08 | 0.01 | 3.91E-06  |
| KIT     | rs72704195  | 4  | 174569481 | G | A | 0.38 | -0.05 | 0.01 | 6.51E-06  |
| KIT     | rs12203592  | 6  | 396321    | T | C | 0.22 | -0.11 | 0.01 | 1.40E-15  |
| KIT     | rs9266141   | 6  | 31356246  | G | C | 0.24 | -0.07 | 0.01 | 1.10E-06  |
| KIT     | rs12350739  | 9  | 16885019  | A | G | 0.61 | -0.14 | 0.01 | 9.99E-35  |
| KIT     | rs10118718  | 9  | 106676694 | A | G | 0.10 | 0.09  | 0.01 | 1.99E-06  |
| KIT     | rs7098111   | 10 | 117813667 | T | C | 0.17 | 0.11  | 0.01 | 8.38E-14  |
| KIT     | rs3008336   | 10 | 133286029 | C | T | 0.84 | -0.07 | 0.01 | 2.50E-06  |
| KIT     | rs35056404  | 11 | 44579183  | A | G | 0.06 | 0.18  | 0.01 | 7.55E-15  |
| KIT     | rs2155311   | 11 | 126421580 | A | G | 0.48 | -0.08 | 0.01 | 1.79E-11  |
| KIT     | rs12316107  | 12 | 12782294  | A | C | 0.24 | 0.07  | 0.01 | 2.78E-08  |
| KIT     | rs138854007 | 12 | 57128474  | G | C | 0.08 | -0.12 | 0.01 | 3.56E-08  |
| KIT     | rs746028214 | 12 | 120818823 | T | A | 0.63 | -0.06 | 0.01 | 5.65E-07  |
| KIT     | rs562342198 | 16 | 1242412   | G | A | 0.04 | -0.17 | 0.02 | 3.53E-09  |
| KIT     | rs1805007   | 16 | 89919709  | T | C | 0.11 | -0.15 | 0.01 | 6.43E-18  |
| KIT     | rs17758695  | 18 | 63253621  | T | C | 0.03 | -0.23 | 0.02 | 7.00E-13  |
| KIT     | rs78744187  | 19 | 33263642  | T | C | 0.08 | 0.32  | 0.01 | 8.89E-62  |
| KIT     | rs12609373  | 19 | 51795028  | C | T | 0.22 | -0.06 | 0.01 | 2.73E-05  |
| KIT     | rs2248555   | 21 | 41148410  | G | A | 0.50 | 0.10  | 0.01 | 1.23E-19  |
| KITLG   | rs6672758   | 1  | 230167766 | T | C | 0.80 | -0.06 | 0.01 | 1.82E-05  |
| KITLG   | rs705379    | 7  | 95324583  | A | G | 0.48 | 0.08  | 0.01 | 2.52E-12  |
| KITLG   | rs983309    | 8  | 9320222   | G | T | 0.88 | 0.08  | 0.01 | 5.90E-06  |
| KITLG   | rs112875651 | 8  | 125494452 | A | G | 0.39 | 0.07  | 0.01 | 3.99E-09  |
| KITLG   | rs2740488   | 9  | 104899461 | C | A | 0.27 | -0.10 | 0.01 | 1.59E-15  |
| KITLG   | rs635634    | 9  | 133279427 | T | C | 0.18 | -0.07 | 0.01 | 4.73E-07  |
| KITLG   | rs174564    | 11 | 61820833  | G | A | 0.35 | 0.07  | 0.01 | 1.00E-08  |
| KITLG   | rs673335    | 11 | 75739531  | C | T | 0.15 | 0.08  | 0.01 | 1.46E-07  |
| KITLG   | rs11105121  | 12 | 88970809  | T | C | 0.66 | -0.05 | 0.01 | 8.39E-06  |
| KITLG   | rs150844304 | 15 | 43434427  | C | A | 0.02 | -0.20 | 0.02 | 3.39E-08  |
| KITLG   | rs247617    | 16 | 56956804  | A | C | 0.32 | 0.13  | 0.01 | 1.75E-29  |
| KITLG   | rs2292318   | 16 | 67951803  | T | C | 0.12 | 0.15  | 0.01 | 3.61E-19  |
| KITLG   | rs34931250  | 17 | 68883786  | T | C | 0.06 | -0.11 | 0.02 | 5.12E-06  |
| KITLG   | rs367070    | 19 | 54296648  | G | A | 0.23 | 0.11  | 0.01 | 1.14E-15  |
| KITLG   | rs2868346   | 20 | 45919331  | T | C | 0.76 | -0.31 | 0.01 | 1.47E-124 |
| KLB     | rs114165349 | 1  | 26695422  | C | G | 0.02 | -0.14 | 0.02 | 1.61E-05  |
| KLB     | rs13108218  | 4  | 3442204   | G | A | 0.62 | 0.05  | 0.01 | 2.81E-05  |
| KLB     | rs13103023  | 4  | 39455997  | A | G | 0.33 | -0.76 | 0.01 | 0.00E+00  |

|       |             |    |           |   |   |      |       |      |           |
|-------|-------------|----|-----------|---|---|------|-------|------|-----------|
| KLB   | rs3135911   | 5  | 177086895 | A | C | 0.29 | -0.17 | 0.01 | 3.49E-55  |
| KLB   | -           | 7  | 150805380 | A | T | 0.11 | 0.07  | 0.01 | 1.91E-05  |
| KLB   | rs35254320  | 12 | 20885935  | T | C | 0.15 | 0.08  | 0.01 | 7.00E-09  |
| KLB   | rs28929474  | 14 | 94378610  | T | C | 0.02 | 0.33  | 0.02 | 5.62E-22  |
| KLB   | rs60134803  | 17 | 9697411   | G | A | 0.24 | 0.06  | 0.01 | 3.44E-06  |
| KLB   | rs112001035 | 17 | 68827664  | A | G | 0.06 | -0.66 | 0.01 | 2.01E-221 |
| KLB   | rs897764    | 19 | 35068720  | C | T | 0.94 | 0.10  | 0.01 | 3.08E-07  |
| KLK1  | rs3888951   | 1  | 15997599  | T | C | 0.40 | 0.04  | 0.01 | 4.66E-06  |
| KLK1  | rs2576570   | 1  | 117605053 | C | A | 0.58 | -0.05 | 0.01 | 2.18E-09  |
| KLK1  | rs423144    | 1  | 155199564 | T | G | 0.43 | 0.05  | 0.01 | 2.03E-08  |
| KLK1  | rs35275076  | 2  | 121212785 | C | T | 0.55 | -0.05 | 0.01 | 4.83E-08  |
| KLK1  | rs11889674  | 2  | 213162094 | A | G | 0.39 | 0.04  | 0.01 | 3.20E-07  |
| KLK1  | -           | 3  | 186932142 | C | G | 0.62 | 0.06  | 0.01 | 7.58E-13  |
| KLK1  | rs2170582   | 5  | 44371567  | G | A | 0.67 | -0.04 | 0.01 | 1.21E-05  |
| KLK1  | rs8176693   | 9  | 133262254 | T | C | 0.06 | 0.18  | 0.01 | 2.06E-23  |
| KLK1  | rs3862630   | 11 | 126373754 | T | C | 0.12 | 0.21  | 0.01 | 2.88E-59  |
| KLK1  | rs7397745   | 12 | 123733479 | C | T | 0.58 | 0.05  | 0.01 | 1.37E-08  |
| KLK1  | rs9529913   | 13 | 71770957  | T | C | 0.60 | 0.06  | 0.01 | 1.43E-11  |
| KLK1  | rs55714927  | 17 | 7176997   | T | C | 0.19 | 0.06  | 0.01 | 3.53E-09  |
| KLK1  | rs601338    | 19 | 48703417  | A | G | 0.51 | 0.89  | 0.01 | 0.00E+00  |
| KLK1  | rs66464836  | 21 | 41312157  | G | C | 0.11 | -0.07 | 0.01 | 6.96E-07  |
| KLK10 | rs4576692   | 1  | 119539250 | T | C | 0.68 | -0.06 | 0.01 | 2.11E-07  |
| KLK10 | rs2596487   | 6  | 31357279  | T | C | 0.22 | -0.06 | 0.01 | 1.04E-05  |
| KLK10 | rs375524395 | 9  | 106744749 | G | A | 0.46 | 0.05  | 0.01 | 5.70E-06  |
| KLK10 | rs139130389 | 11 | 72139110  | A | C | 0.07 | -0.19 | 0.01 | 1.71E-21  |
| KLK10 | rs1065853   | 19 | 44909976  | T | G | 0.08 | 0.10  | 0.01 | 4.80E-06  |
| KLK10 | rs2569454   | 19 | 51019947  | C | T | 0.58 | 0.59  | 0.01 | 0.00E+00  |
| KLK11 | rs34255800  | 2  | 241792031 | C | G | 0.15 | -0.23 | 0.01 | 1.28E-50  |
| KLK11 | -           | 5  | 109693185 | A | C | 0.32 | 0.06  | 0.01 | 5.04E-07  |
| KLK11 | rs369705328 | 10 | 17806193  | C | G | 0.13 | 0.08  | 0.01 | 5.95E-06  |
| KLK11 | rs139130389 | 11 | 72139110  | A | C | 0.07 | -0.45 | 0.01 | 4.45E-103 |
| KLK11 | rs36060036  | 16 | 20350628  | T | C | 0.17 | -0.07 | 0.01 | 2.56E-06  |
| KLK11 | rs186021206 | 17 | 7166093   | A | G | 0.01 | 0.48  | 0.05 | 1.92E-10  |
| KLK11 | rs117268623 | 19 | 51024714  | T | C | 0.03 | -1.14 | 0.02 | 1.31E-289 |
| KLK12 | rs2479016   | 6  | 2245111   | G | A | 0.43 | -0.07 | 0.00 | 2.10E-22  |
| KLK12 | rs11220477  | 11 | 126405507 | T | C | 0.04 | -0.13 | 0.01 | 2.58E-14  |
| KLK12 | rs186021206 | 17 | 7166093   | A | G | 0.01 | 0.23  | 0.03 | 2.65E-06  |
| KLK12 | rs79744308  | 19 | 5827754   | A | G | 0.04 | 0.15  | 0.02 | 1.26E-06  |
| KLK12 | rs3745540   | 19 | 51031874  | G | A | 0.58 | -1.16 | 0.01 | 0.00E+00  |
| KLK13 | rs12995525  | 2  | 106943538 | G | T | 0.50 | 0.06  | 0.01 | 1.50E-08  |
| KLK13 | rs2479016   | 6  | 2245111   | G | A | 0.43 | -0.06 | 0.01 | 2.76E-07  |
| KLK13 | rs529700    | 10 | 17843438  | C | T | 0.51 | 0.06  | 0.01 | 5.55E-06  |
| KLK13 | rs226379    | 12 | 9115989   | C | T | 0.36 | 0.08  | 0.01 | 4.81E-12  |
| KLK13 | rs5511      | 14 | 94567258  | T | A | 0.22 | 0.14  | 0.01 | 5.90E-27  |
| KLK13 | rs55707100  | 15 | 43528519  | T | C | 0.02 | -0.17 | 0.02 | 6.02E-07  |
| KLK13 | rs186021206 | 17 | 7166093   | A | G | 0.01 | 0.66  | 0.05 | 3.16E-19  |
| KLK13 | rs75181977  | 18 | 48043515  | G | A | 0.10 | 0.10  | 0.01 | 3.35E-08  |
| KLK13 | rs78060698  | 19 | 5832762   | A | G | 0.04 | 0.18  | 0.02 | 3.55E-10  |
| KLK13 | rs681343    | 19 | 48703205  | T | C | 0.51 | -0.07 | 0.01 | 1.81E-10  |
| KLK13 | rs3760739   | 19 | 51035305  | T | G | 0.35 | -0.45 | 0.01 | 0.00E+00  |
| KLK14 | rs61816761  | 1  | 152313385 | A | G | 0.02 | 0.17  | 0.02 | 5.63E-06  |
| KLK14 | rs58741371  | 2  | 118876005 | C | T | 0.20 | 0.07  | 0.01 | 1.77E-07  |
| KLK14 | rs6982210   | 8  | 10742484  | A | G | 0.60 | -0.05 | 0.01 | 7.57E-07  |
| KLK14 | rs60978445  | 9  | 108010756 | C | T | 0.19 | -0.07 | 0.01 | 2.13E-07  |
| KLK14 | rs635634    | 9  | 133279427 | T | C | 0.18 | -0.08 | 0.01 | 1.32E-08  |
| KLK14 | rs11599750  | 10 | 100045685 | T | C | 0.41 | -0.06 | 0.01 | 2.55E-09  |

|       |             |    |           |   |   |      |       |      |           |
|-------|-------------|----|-----------|---|---|------|-------|------|-----------|
| KLK14 | rs61729512  | 12 | 7485173   | A | G | 0.12 | 0.14  | 0.01 | 1.64E-17  |
| KLK14 | rs1863115   | 17 | 46548562  | A | C | 0.74 | -0.07 | 0.01 | 2.91E-08  |
| KLK14 | rs2569491   | 19 | 51081659  | A | G | 0.30 | 0.41  | 0.01 | 9.63E-258 |
| KLK14 | rs12986064  | 19 | 54251270  | C | T | 0.51 | -0.07 | 0.01 | 1.50E-08  |
| KLK14 | rs1295837   | 20 | 57012542  | G | C | 0.51 | -0.05 | 0.01 | 2.28E-05  |
| KLK4  | rs10157145  | 1  | 205292835 | C | T | 0.50 | -0.04 | 0.01 | 1.45E-06  |
| KLK4  | rs28929474  | 14 | 94378610  | T | C | 0.02 | -0.44 | 0.02 | 1.88E-44  |
| KLK4  | rs2664153   | 19 | 50911996  | A | G | 0.64 | -0.42 | 0.01 | 0.00E+00  |
| KLK6  | rs9933330   | 16 | 20355488  | T | C | 0.18 | -0.07 | 0.01 | 6.51E-06  |
| KLK6  | rs268891    | 19 | 50968727  | C | A | 0.65 | -0.19 | 0.01 | 5.82E-58  |
| KLK6  | rs12986064  | 19 | 54251270  | C | T | 0.51 | -0.07 | 0.01 | 7.71E-09  |
| KLK8  | rs61816761  | 1  | 152313385 | A | G | 0.02 | 0.32  | 0.02 | 1.22E-18  |
| KLK8  | rs121908120 | 2  | 218890289 | A | T | 0.03 | -0.15 | 0.02 | 4.02E-06  |
| KLK8  | rs186021206 | 17 | 7166093   | A | G | 0.01 | 0.41  | 0.05 | 1.90E-08  |
| KLK8  | rs74705037  | 19 | 51001552  | A | G | 0.05 | 1.05  | 0.02 | 0.00E+00  |
| KLK8  | rs12986064  | 19 | 54251270  | C | T | 0.51 | -0.06 | 0.01 | 8.54E-07  |
| KLRB1 | rs4149909   | 1  | 241860596 | G | A | 0.03 | 0.15  | 0.02 | 3.45E-06  |
| KLRB1 | rs4672505   | 2  | 62333197  | G | A | 0.64 | 0.08  | 0.01 | 3.62E-12  |
| KLRB1 | rs2009581   | 2  | 111050100 | A | G | 0.27 | -0.07 | 0.01 | 2.02E-08  |
| KLRB1 | rs4449583   | 5  | 1284020   | T | C | 0.33 | 0.07  | 0.01 | 1.34E-08  |
| KLRB1 | rs2549002   | 5  | 132493886 | A | C | 0.66 | 0.05  | 0.01 | 1.26E-05  |
| KLRB1 | rs2249932   | 6  | 31359384  | C | T | 0.30 | 0.08  | 0.01 | 2.34E-11  |
| KLRB1 | rs900567    | 8  | 78647387  | T | C | 0.75 | -0.06 | 0.01 | 2.65E-06  |
| KLRB1 | -           | 9  | 133276163 | T | A | 0.19 | -0.09 | 0.01 | 3.20E-09  |
| KLRB1 | rs7086174   | 10 | 5974436   | A | C | 0.33 | 0.06  | 0.01 | 3.60E-07  |
| KLRB1 | rs563890415 | 12 | 9601084   | C | T | 0.01 | -1.12 | 0.05 | 6.77E-58  |
| KLRB1 | rs3184504   | 12 | 111446804 | C | T | 0.52 | -0.13 | 0.01 | 9.24E-31  |
| KLRB1 | rs12437803  | 15 | 50705069  | A | G | 0.19 | -0.18 | 0.01 | 9.85E-38  |
| KLRB1 | rs11071528  | 15 | 60409598  | C | G | 0.81 | 0.08  | 0.01 | 8.50E-09  |
| KLRB1 | rs34785252  | 19 | 54814361  | A | C | 0.29 | -0.06 | 0.01 | 2.21E-05  |
| KLRD1 | rs2009581   | 2  | 111050100 | A | G | 0.27 | -0.11 | 0.01 | 1.17E-20  |
| KLRD1 | rs13063578  | 3  | 47046347  | A | T | 0.40 | -0.08 | 0.01 | 1.02E-14  |
| KLRD1 | rs2706385   | 5  | 132496074 | G | T | 0.66 | 0.06  | 0.01 | 5.37E-07  |
| KLRD1 | rs1655895   | 6  | 29944740  | C | T | 0.85 | -0.28 | 0.01 | 1.32E-79  |
| KLRD1 | rs12684650  | 9  | 136218808 | T | C | 0.32 | -0.06 | 0.01 | 8.07E-07  |
| KLRD1 | rs8177655   | 10 | 5973156   | A | G | 0.33 | 0.05  | 0.01 | 8.55E-06  |
| KLRD1 | rs2537752   | 12 | 10314934  | A | T | 0.60 | -0.42 | 0.01 | 0.00E+00  |
| KLRD1 | rs3184504   | 12 | 111446804 | C | T | 0.52 | -0.10 | 0.01 | 1.34E-21  |
| KLRD1 | rs34853473  | 14 | 65554433  | A | T | 0.66 | -0.05 | 0.01 | 8.24E-07  |
| KLRD1 | rs58745116  | 17 | 35476573  | A | G | 0.39 | -0.06 | 0.01 | 8.00E-09  |
| KLRD1 | rs3744283   | 17 | 64082771  | C | G | 0.16 | -0.07 | 0.01 | 2.30E-06  |
| KLRD1 | rs875622    | 19 | 16356948  | G | A | 0.77 | 0.05  | 0.01 | 2.81E-05  |
| KLRD1 | rs28873836  | 19 | 51811402  | C | G | 0.27 | -0.24 | 0.01 | 4.16E-93  |
| KLRD1 | rs35545130  | 19 | 54815642  | G | C | 0.32 | -0.06 | 0.01 | 5.91E-07  |
| KRT18 | rs79287178  | 3  | 172576710 | A | G | 0.03 | -0.15 | 0.02 | 1.71E-05  |
| KRT18 | rs7678352   | 4  | 145893165 | T | C | 0.16 | 0.07  | 0.01 | 1.56E-06  |
| KRT18 | rs7043196   | 9  | 114371911 | T | C | 0.50 | -0.05 | 0.01 | 2.95E-06  |
| KRT18 | rs35696875  | 10 | 69222380  | A | T | 0.70 | 0.06  | 0.01 | 5.03E-06  |
| KRT18 | rs10883451  | 10 | 100164661 | C | T | 0.50 | -0.05 | 0.01 | 1.18E-06  |
| KRT18 | rs11601507  | 11 | 5679844   | A | C | 0.07 | 0.20  | 0.01 | 8.43E-21  |
| KRT18 | rs28929474  | 14 | 94378610  | T | C | 0.02 | 0.19  | 0.02 | 6.20E-07  |
| KRT18 | rs200210321 | 19 | 19283081  | G | A | 0.07 | 0.09  | 0.01 | 9.65E-06  |
| KRT18 | rs132642    | 22 | 36149089  | T | A | 0.83 | 0.07  | 0.01 | 7.35E-07  |
| KRT18 | rs3747207   | 22 | 43928975  | A | G | 0.22 | 0.10  | 0.01 | 2.55E-14  |
| KRT19 | rs7313347   | 12 | 52871715  | A | G | 0.59 | -0.05 | 0.01 | 5.65E-06  |
| KRT19 | rs7405611   | 17 | 41535160  | A | G | 0.62 | 0.15  | 0.01 | 4.33E-36  |



|        |             |    |           |   |   |      |       |      |           |
|--------|-------------|----|-----------|---|---|------|-------|------|-----------|
| KRT19  | rs601338    | 19 | 48703417  | A | G | 0.51 | -0.06 | 0.01 | 4.22E-07  |
| KRT5   | rs72656914  | 1  | 150579726 | T | C | 0.04 | 0.28  | 0.02 | 5.64E-23  |
| KRT5   | rs210135    | 6  | 33572915  | A | T | 0.70 | -0.08 | 0.01 | 6.10E-10  |
| KRT5   | rs73015965  | 6  | 160706469 | G | A | 0.01 | -0.71 | 0.05 | 1.03E-21  |
| KRT5   | rs607860    | 12 | 52519245  | T | C | 0.41 | -0.11 | 0.01 | 8.87E-21  |
| KRT5   | rs7240884   | 18 | 59901461  | G | A | 0.42 | 0.08  | 0.01 | 1.12E-13  |
| KYAT1  | rs138429240 | 1  | 6628579   | T | C | 0.00 | 0.68  | 0.05 | 2.70E-17  |
| KYAT1  | rs3811444   | 1  | 247876149 | T | C | 0.33 | -0.06 | 0.01 | 6.79E-06  |
| KYAT1  | rs1354034   | 3  | 56815721  | C | T | 0.60 | 0.06  | 0.01 | 2.84E-07  |
| KYAT1  | rs35072117  | 3  | 101822845 | G | T | 0.46 | 0.06  | 0.01 | 6.00E-06  |
| KYAT1  | rs6993770   | 8  | 105569300 | T | A | 0.29 | -0.06 | 0.01 | 9.48E-06  |
| KYAT1  | -           | 9  | 128849806 | A | G | 0.71 | -0.14 | 0.01 | 2.32E-28  |
| KYAT1  | rs60822569  | 12 | 54323724  | C | T | 0.55 | 0.06  | 0.01 | 5.92E-07  |
| KYNU   | rs78244381  | 2  | 142924180 | A | C | 0.05 | 0.57  | 0.02 | 8.02E-108 |
| KYNU   | rs1150755   | 6  | 32070773  | T | C | 0.17 | -0.07 | 0.01 | 2.25E-06  |
| KYNU   | rs113609637 | 9  | 93140817  | T | A | 0.14 | -0.07 | 0.01 | 1.30E-05  |
| KYNU   | rs10846740  | 12 | 124818736 | C | T | 0.86 | -0.08 | 0.01 | 2.36E-07  |
| KYNU   | rs200210321 | 19 | 19283081  | G | A | 0.07 | 0.10  | 0.01 | 1.07E-06  |
| KYNU   | rs3747207   | 22 | 43928975  | A | G | 0.22 | 0.10  | 0.01 | 2.79E-14  |
| L1CAM  | rs3791101   | 1  | 43900578  | A | G | 0.31 | 0.06  | 0.01 | 5.18E-08  |
| L1CAM  | rs1260326   | 2  | 27508073  | C | T | 0.61 | 0.06  | 0.01 | 3.20E-07  |
| L1CAM  | -           | 9  | 133263362 | G | A | 0.18 | -0.49 | 0.01 | 8.65E-266 |
| L1CAM  | rs56278466  | 10 | 17833858  | G | T | 0.66 | 0.05  | 0.01 | 7.08E-06  |
| L1CAM  | rs139130389 | 11 | 72139110  | A | C | 0.07 | -0.31 | 0.01 | 3.01E-50  |
| L1CAM  | rs3781781   | 11 | 126410650 | C | T | 0.32 | -0.10 | 0.01 | 2.37E-19  |
| L1CAM  | rs186021206 | 17 | 7166093   | A | G | 0.01 | 1.30  | 0.05 | 2.46E-70  |
| L1CAM  | rs5757680   | 22 | 39448788  | C | T | 0.75 | -0.08 | 0.01 | 3.25E-11  |
| LACTB2 | rs1354034   | 3  | 56815721  | C | T | 0.60 | 0.07  | 0.01 | 3.40E-09  |
| LACTB2 | rs191588099 | 8  | 70617631  | A | G | 0.01 | -1.11 | 0.05 | 2.08E-56  |
| LACTB2 | -           | 10 | 63156270  | A | T | 0.48 | 0.05  | 0.01 | 1.12E-05  |
| LACTB2 | rs1613662   | 19 | 55025227  | A | G | 0.83 | 0.07  | 0.01 | 2.15E-05  |
| LAG3   | rs12740374  | 1  | 109274968 | T | G | 0.22 | -0.19 | 0.01 | 5.08E-48  |
| LAG3   | rs115216147 | 5  | 71369699  | A | T | 0.07 | -0.15 | 0.01 | 7.39E-12  |
| LAG3   | rs35829610  | 5  | 132488170 | G | C | 0.34 | -0.07 | 0.01 | 1.60E-10  |
| LAG3   | rs9264419   | 6  | 31262360  | A | G | 0.11 | 0.11  | 0.01 | 1.43E-09  |
| LAG3   | rs11773763  | 7  | 50231903  | T | C | 0.32 | -0.05 | 0.01 | 1.99E-05  |
| LAG3   | -           | 10 | 80523403  | A | T | 0.73 | 0.06  | 0.01 | 1.31E-06  |
| LAG3   | rs950802    | 11 | 60385111  | A | G | 0.31 | 0.05  | 0.01 | 6.06E-06  |
| LAG3   | rs1056008   | 12 | 553672    | C | T | 0.26 | -0.06 | 0.01 | 6.25E-06  |
| LAG3   | rs3782735   | 12 | 6775910   | A | G | 0.60 | 0.18  | 0.01 | 3.21E-53  |
| LAG3   | rs597808    | 12 | 111535554 | G | A | 0.52 | -0.11 | 0.01 | 5.55E-23  |
| LAG3   | rs139974673 | 15 | 43735687  | C | T | 0.02 | -0.21 | 0.02 | 5.62E-09  |
| LAG3   | rs186021206 | 17 | 7166093   | A | G | 0.01 | 0.53  | 0.05 | 5.83E-12  |
| LAG3   | rs77542162  | 17 | 69085137  | G | A | 0.02 | 0.28  | 0.02 | 9.88E-15  |
| LAIR1  | rs333947    | 1  | 109928142 | A | G | 0.15 | 0.06  | 0.01 | 1.72E-05  |
| LAIR1  | rs3184504   | 12 | 111446804 | C | T | 0.52 | -0.05 | 0.01 | 6.73E-07  |
| LAIR1  | rs77924615  | 16 | 20381010  | A | G | 0.20 | -0.06 | 0.01 | 7.24E-07  |
| LAIR1  | rs111949142 | 19 | 54358584  | A | T | 0.18 | 0.72  | 0.01 | 0.00E+00  |
| LAIR2  | rs13063578  | 3  | 47046347  | A | T | 0.40 | -0.04 | 0.01 | 7.60E-07  |
| LAIR2  | rs3184504   | 12 | 111446804 | C | T | 0.52 | -0.07 | 0.01 | 1.71E-15  |
| LAIR2  | rs4781977   | 16 | 17478817  | C | T | 0.23 | 0.07  | 0.01 | 2.14E-12  |
| LAIR2  | rs35663614  | 19 | 16327617  | C | G | 0.63 | -0.06 | 0.01 | 2.45E-07  |
| LAIR2  | rs73070113  | 19 | 54502956  | T | A | 0.14 | -1.06 | 0.01 | 0.00E+00  |
| LAMA4  | rs61809091  | 1  | 183149528 | C | T | 0.41 | 0.08  | 0.01 | 2.88E-11  |
| LAMA4  | rs1421929   | 5  | 53057783  | G | A | 0.49 | -0.05 | 0.01 | 1.96E-05  |
| LAMA4  | rs1917342   | 6  | 70640051  | G | A | 0.30 | -0.06 | 0.01 | 7.02E-06  |

|       |             |    |           |   |   |      |       |      |           |
|-------|-------------|----|-----------|---|---|------|-------|------|-----------|
| LAMA4 | rs7765769   | 6  | 112138348 | C | T | 0.44 | 0.17  | 0.01 | 1.46E-51  |
| LAMA4 | rs41281051  | 7  | 107972762 | C | T | 0.46 | -0.06 | 0.01 | 7.71E-07  |
| LAMA4 | rs6993770   | 8  | 105569300 | T | A | 0.29 | -0.10 | 0.01 | 1.36E-16  |
| LAMA4 | rs10761731  | 10 | 63267850  | T | A | 0.42 | 0.09  | 0.01 | 1.61E-14  |
| LAMA4 | rs7980201   | 12 | 7487993   | T | C | 0.10 | 0.10  | 0.01 | 3.52E-07  |
| LAMA4 | rs13339274  | 16 | 81841954  | T | C | 0.14 | 0.08  | 0.01 | 3.93E-07  |
| LAMA4 | rs143040759 | 17 | 35766707  | A | G | 0.02 | 0.62  | 0.03 | 2.94E-57  |
| LAMA4 | rs892090    | 19 | 55027704  | G | T | 0.83 | 0.13  | 0.01 | 1.34E-17  |
| LAMA4 | rs4813351   | 20 | 19288289  | T | C | 0.37 | 0.05  | 0.01 | 1.68E-05  |
| LAMP2 | rs9427104   | 1  | 154616756 | T | C | 0.48 | -0.06 | 0.01 | 1.52E-06  |
| LAMP2 | rs41274050  | 10 | 50814012  | T | C | 0.01 | 0.27  | 0.04 | 2.51E-06  |
| LAMP3 | rs11921884  | 3  | 183110457 | T | G | 0.65 | 0.23  | 0.01 | 2.01E-93  |
| LAMP3 | rs13107325  | 4  | 102267552 | T | C | 0.08 | 0.10  | 0.01 | 4.76E-06  |
| LAMP3 | rs9263519   | 6  | 31099407  | A | G | 0.33 | -0.06 | 0.01 | 1.58E-07  |
| LAMP3 | rs13281991  | 8  | 119911334 | C | T | 0.56 | 0.05  | 0.01 | 1.46E-05  |
| LAMP3 | rs507666    | 9  | 133273983 | A | G | 0.18 | -0.07 | 0.01 | 2.62E-07  |
| LAMP3 | rs35705950  | 11 | 1219991   | T | G | 0.11 | 0.09  | 0.01 | 9.10E-07  |
| LAMP3 | rs7962469   | 12 | 51954475  | G | A | 0.65 | 0.05  | 0.01 | 1.34E-05  |
| LAMP3 | -           | 12 | 101880278 | C | T | 0.38 | 0.07  | 0.01 | 1.39E-10  |
| LAMP3 | rs3184504   | 12 | 111446804 | C | T | 0.52 | -0.06 | 0.01 | 3.25E-08  |
| LAMP3 | rs117169628 | 16 | 89196249  | A | G | 0.14 | -0.09 | 0.01 | 6.45E-09  |
| LAMP3 | rs186021206 | 17 | 7166093   | A | G | 0.01 | 0.44  | 0.05 | 3.34E-09  |
| LAMP3 | rs892225    | 19 | 1152657   | G | A | 0.38 | -0.07 | 0.01 | 2.85E-09  |
| LAT   | rs13412535  | 2  | 224010157 | A | G | 0.23 | -0.06 | 0.01 | 1.45E-05  |
| LAT   | rs3804749   | 3  | 123114156 | T | C | 0.59 | -0.06 | 0.01 | 1.24E-06  |
| LAT   | rs17622656  | 5  | 132485305 | A | G | 0.39 | -0.05 | 0.01 | 6.11E-06  |
| LAT   | rs6993770   | 8  | 105569300 | T | A | 0.29 | -0.09 | 0.01 | 1.03E-13  |
| LAT   | rs7080386   | 10 | 63288546  | A | C | 0.41 | 0.07  | 0.01 | 2.93E-08  |
| LAT   | rs892090    | 19 | 55027704  | G | T | 0.83 | 0.09  | 0.01 | 1.94E-09  |
| LAT2  | rs1354034   | 3  | 56815721  | C | T | 0.60 | 0.06  | 0.01 | 7.61E-08  |
| LAYN  | rs61747728  | 1  | 179557079 | T | C | 0.04 | 0.12  | 0.02 | 1.08E-05  |
| LAYN  | rs539726870 | 6  | 32638754  | G | A | 0.12 | 0.09  | 0.01 | 3.98E-07  |
| LAYN  | rs8176719   | 9  | 133257521 | C | T | 0.34 | 0.07  | 0.01 | 3.79E-10  |
| LAYN  | rs542275    | 11 | 111560889 | T | C | 0.62 | 0.39  | 0.01 | 8.47E-272 |
| LAYN  | rs7203642   | 16 | 20355808  | G | A | 0.19 | -0.07 | 0.01 | 8.11E-08  |
| LBP   | rs34931250  | 17 | 68883786  | T | C | 0.06 | 0.11  | 0.01 | 4.01E-07  |
| LBP   | rs573329980 | 20 | 32563114  | A | G | 0.19 | 0.09  | 0.01 | 1.24E-08  |
| LBP   | rs2232613   | 20 | 38369011  | T | C | 0.08 | -1.18 | 0.01 | 0.00E+00  |
| LBR   | rs1354034   | 3  | 56815721  | C | T | 0.60 | 0.16  | 0.01 | 3.30E-47  |
| LBR   | rs342293    | 7  | 106731773 | G | C | 0.46 | -0.06 | 0.01 | 9.86E-08  |
| LBR   | rs10733789  | 10 | 63188924  | C | T | 0.31 | 0.06  | 0.01 | 5.40E-07  |
| LBR   | rs7080536   | 10 | 113588287 | A | G | 0.04 | -0.22 | 0.02 | 2.42E-15  |
| LBR   | rs11604127  | 11 | 196944    | T | C | 0.23 | 0.09  | 0.01 | 1.22E-10  |
| LBR   | rs10876550  | 12 | 54318524  | A | G | 0.56 | 0.05  | 0.01 | 3.08E-06  |
| LCN2  | rs3917932   | 1  | 36478315  | G | C | 0.58 | -0.07 | 0.01 | 1.31E-10  |
| LCN2  | rs3014874   | 1  | 153365467 | A | G | 0.26 | 0.07  | 0.01 | 7.07E-09  |
| LCN2  | rs113542380 | 2  | 43237679  | A | G | 0.07 | 0.10  | 0.01 | 5.75E-06  |
| LCN2  | rs2305637   | 3  | 47004356  | T | C | 0.18 | 0.08  | 0.01 | 1.47E-07  |
| LCN2  | rs218264    | 4  | 54542708  | T | A | 0.25 | 0.08  | 0.01 | 1.38E-08  |
| LCN2  | rs5869700   | 5  | 95917754  | T | C | 0.33 | 0.08  | 0.01 | 1.56E-10  |
| LCN2  | rs12520928  | 5  | 132970199 | A | C | 0.16 | 0.09  | 0.01 | 6.87E-10  |
| LCN2  | rs2158799   | 7  | 28237488  | G | C | 0.61 | 0.06  | 0.01 | 5.95E-07  |
| LCN2  | rs1870028   | 7  | 50218717  | T | C | 0.07 | 0.16  | 0.01 | 8.12E-13  |
| LCN2  | rs7846314   | 8  | 60738272  | T | A | 0.19 | 0.13  | 0.01 | 1.08E-18  |
| LCN2  | rs4407843   | 8  | 129597122 | C | A | 0.57 | -0.06 | 0.01 | 2.08E-08  |
| LCN2  | rs542243688 | 9  | 128143271 | A | C | 0.03 | -0.22 | 0.02 | 8.32E-09  |

|        |             |            |           |           |   |      |       |      |           |          |
|--------|-------------|------------|-----------|-----------|---|------|-------|------|-----------|----------|
| LCN2   | rs181969679 | 12         | 53617945  | G         | A | 0.01 | 0.34  | 0.04 | 4.61E-08  |          |
| LCN2   | rs4997081   | 16         | 20353912  | C         | G | 0.19 | -0.06 | 0.01 | 2.41E-05  |          |
| LCN2   | rs2241244   | 17         | 39997301  | C         | G | 0.54 | -0.12 | 0.01 | 1.74E-27  |          |
| LCN2   | rs7246563   | 19         | 12411814  | C         | T | 0.22 | -0.07 | 0.01 | 2.57E-06  |          |
| LCN2   | rs78030362  | 19         | 18464383  | G         | A | 0.07 | -0.15 | 0.01 | 4.04E-11  |          |
| LCN2   | rs243591    | 21         | 17783489  | C         | A | 0.48 | -0.06 | 0.01 | 7.09E-07  |          |
| LDLR   | rs765974791 | 1          | 62541132  | T         | C | 0.64 | 0.10  | 0.01 | 2.37E-17  |          |
| LDLR   | rs1260326   | 2          | 27508073  | C         | T | 0.61 | -0.08 | 0.01 | 2.18E-12  |          |
| LDLR   | rs4704834   | 5          | 157016055 | G         | A | 0.65 | 0.08  | 0.01 | 1.16E-12  |          |
| LDLR   | rs451637    | 6          | 32027005  | T         | C | 0.31 | -0.06 | 0.01 | 1.86E-07  |          |
| LDLR   | rs3812316   | 7          | 73606007  | G         | C | 0.13 | -0.09 | 0.01 | 1.05E-08  |          |
| LDLR   | rs13702     | 8          | 19966981  | C         | T | 0.29 | -0.09 | 0.01 | 3.61E-14  |          |
| LDLR   | rs2737246   | 8          | 115647351 | C         | G | 0.28 | -0.07 | 0.01 | 8.82E-09  |          |
| LDLR   | rs28601761  | 8          | 125487789 | G         | C | 0.42 | -0.09 | 0.01 | 5.19E-17  |          |
| LDLR   | rs7896832   | 10         | 80497814  | C         | T | 0.79 | 0.06  | 0.01 | 1.85E-05  |          |
| LDLR   | rs2068888   | 10         | 93079885  | A         | G | 0.45 | -0.05 | 0.01 | 1.03E-05  |          |
| LDLR   | rs174533    | 11         | 61781553  | A         | G | 0.35 | 0.07  | 0.01 | 2.44E-09  |          |
| LDLR   | rs964184    | 11         | 116778201 | C         | G | 0.87 | -0.20 | 0.01 | 8.00E-36  |          |
| LDLR   | rs261342    | 15         | 58438954  | C         | G | 0.78 | -0.06 | 0.01 | 1.41E-05  |          |
| LDLR   | rs247617    | 16         | 56956804  | A         | C | 0.32 | -0.09 | 0.01 | 8.03E-16  |          |
| LDLR   | rs77542162  | 17         | 69085137  | G         | A | 0.02 | 0.21  | 0.02 | 2.13E-08  |          |
| LDLR   | rs116843064 | 19         | 8364439   | A         | G | 0.02 | -0.21 | 0.03 | 3.49E-07  |          |
| LDLR   | rs8107974   | 19         | 19277691  | T         | A | 0.08 | -0.12 | 0.01 | 3.29E-08  |          |
| LDLR   | rs1065853   | 19         | 44909976  | T         | G | 0.08 | 0.43  | 0.01 | 5.11E-104 |          |
| LEFTY2 | rs748667196 | 1          | 225887710 | G         | C | 0.37 | -0.71 | 0.01 | 0.00E+00  |          |
| LEFTY2 | rs10027275  | 4          | 148060345 | C         | G | 0.74 | 0.05  | 0.01 | 4.39E-07  |          |
| LEFTY2 | rs635634    | 9          | 133279427 | T         | C | 0.18 | -0.08 | 0.01 | 6.02E-13  |          |
| LEFTY2 | rs113878851 | 16         | 20353760  | T         | C | 0.17 | -0.06 | 0.01 | 7.01E-06  |          |
| LEFTY2 | rs7412      | 19         | 44908822  | T         | C | 0.08 | 0.11  | 0.01 | 7.73E-12  |          |
| LEFTY2 | rs738408    | 22         | 43928850  | T         | C | 0.22 | 0.05  | 0.01 | 9.27E-07  |          |
| LEP    | rs56094641  | 16         | 53772541  | G         | A | 0.40 | 0.04  | 0.01 | 1.63E-05  |          |
| LEPR   | rs10399687  | 1          | 65608299  | T         | C | 0.17 | -0.27 | 0.01 | 1.08E-76  |          |
| LEPR   | rs1260326   | 2          | 27508073  | C         | T | 0.61 | -0.15 | 0.01 | 3.52E-39  |          |
| LEPR   | rs687339    | 3          | 136213517 | T         | C | 0.77 | -0.06 | 0.01 | 2.17E-05  |          |
| LEPR   | rs111269058 | 7          | 73561372  | T         | C | 0.12 | -0.08 | 0.01 | 3.08E-06  |          |
| LEPR   | rs2298475   | 11         | 126408308 | C         | T | 0.07 | -0.09 | 0.01 | 1.38E-05  |          |
| LEPR   | rs2464190   | 12         | 120977587 | C         | T | 0.41 | 0.06  | 0.01 | 7.05E-08  |          |
| LEPR   | rs28929474  | 14         | 94378610  | T         | C | 0.02 | 0.30  | 0.03 | 4.28E-14  |          |
| LEPR   | rs186021206 | 17         | 7166093   | A         | G | 0.01 | 0.41  | 0.05 | 8.87E-08  |          |
| LEPR   | rs1801689   | 17         | 66214462  | C         | A | 0.03 | 0.26  | 0.02 | 4.29E-15  |          |
| LGALS1 | rs10418046  | 19         | 53824615  | G         | T | 0.21 | 0.07  | 0.01 | 1.02E-06  |          |
| LGALS1 | rs4820294   | 22         | 37675036  | A         | G | 0.33 | -0.28 | 0.01 | 1.41E-123 |          |
| LGALS3 | rs78542815  | 7          | 150609714 | G         | A | 0.22 | 0.11  | 0.01 | 4.99E-22  |          |
| LGALS3 | rs6472539   | 8          | 70717575  | C         | G | 0.51 | -0.05 | 0.01 | 7.50E-07  |          |
| LGALS3 | rs751544923 | 11         | 126353222 | A         | G | 0.06 | 0.17  | 0.01 | 2.68E-15  |          |
| LGALS3 | rs765911263 | 12         | 7448239   | A         | G | 0.05 | 0.10  | 0.01 | 9.61E-06  |          |
| LGALS3 | rs2393791   | 12         | 120986153 | T         | C | 0.62 | -0.08 | 0.01 | 4.36E-15  |          |
| LGALS3 | rs3832943   | 14         | 55140083  | T         | A | 0.42 | -0.53 | 0.01 | 0.00E+00  |          |
| LGALS3 | rs17855739  | 19         | 5831829   | T         | C | 0.04 | 0.18  | 0.02 | 1.32E-13  |          |
| LGALS3 | rs516246    | 19         | 48702915  | T         | C | 0.51 | 0.08  | 0.01 | 4.50E-15  |          |
| LGALS3 | rs12986064  | 19         | 54251270  | C         | T | 0.51 | -0.06 | 0.01 | 2.37E-10  |          |
| LGALS4 | rs113323158 | 8          | 71005067  | C         | A | 0.51 | -0.05 | 0.01 | 5.19E-06  |          |
| LGALS4 | rs505922    | 9          | 133273813 | C         | T | 0.32 | -0.52 | 0.01 | 0.00E+00  |          |
| LGALS4 | rs17655730  | 11         | 270715    | C         | T | 0.25 | 0.06  | 0.01 | 7.45E-06  |          |
| LGALS4 | rs140695578 | 19         | 38774589  | T         | A | 0.03 | 0.27  | 0.02 | 1.06E-20  |          |
| LGALS7 | LGALS7B     | rs61816761 | 1         | 152313385 | A | G    | 0.02  | 0.32 | 0.02      | 5.60E-18 |

|                |             |    |           |   |   |      |       |      |           |
|----------------|-------------|----|-----------|---|---|------|-------|------|-----------|
| LGALS7_LGALS7B | rs833270    | 3  | 181802378 | C | T | 0.62 | 0.05  | 0.01 | 1.10E-05  |
| LGALS7_LGALS7B | rs505922    | 9  | 133273813 | C | T | 0.32 | 0.31  | 0.01 | 1.94E-163 |
| LGALS7_LGALS7B | rs17658212  | 15 | 40853721  | T | C | 0.06 | -0.11 | 0.01 | 6.07E-06  |
| LGALS7_LGALS7B | rs9939286   | 16 | 31150982  | G | T | 0.63 | -0.06 | 0.01 | 5.89E-07  |
| LGALS7_LGALS7B | rs6508818   | 19 | 38786514  | G | A | 0.58 | 0.23  | 0.01 | 2.68E-96  |
| LGALS7_LGALS7B | rs601338    | 19 | 48703417  | A | G | 0.51 | 0.05  | 0.01 | 2.08E-05  |
| LGALS8         | rs1475133   | 1  | 236553386 | A | G | 0.76 | 0.30  | 0.01 | 5.85E-125 |
| LGALS8         | rs1354034   | 3  | 56815721  | C | T | 0.60 | 0.08  | 0.01 | 1.28E-11  |
| LGALS8         | rs342293    | 7  | 106731773 | G | C | 0.46 | -0.08 | 0.01 | 7.48E-14  |
| LGALS8         | rs55646585  | 8  | 143925453 | T | C | 0.41 | 0.06  | 0.01 | 1.16E-08  |
| LGALS8         | rs2519093   | 9  | 133266456 | T | C | 0.18 | -0.48 | 0.01 | 1.76E-248 |
| LGALS8         | -           | 10 | 63156270  | A | T | 0.49 | 0.06  | 0.01 | 5.25E-07  |
| LGALS8         | rs60822569  | 12 | 54323724  | C | T | 0.55 | 0.05  | 0.01 | 1.51E-06  |
| LGALS8         | rs8037137   | 15 | 90963407  | C | T | 0.13 | -0.08 | 0.01 | 5.22E-06  |
| LGALS9         | rs3184504   | 12 | 111446804 | C | T | 0.52 | -0.08 | 0.01 | 5.95E-14  |
| LGALS9         | rs12936577  | 17 | 22648851  | T | G | 0.02 | -0.30 | 0.03 | 9.95E-13  |
| LGALS9         | rs79526289  | 17 | 27644953  | G | A | 0.25 | -0.51 | 0.01 | 0.00E+00  |
| LGALS9         | rs601338    | 19 | 48703417  | A | G | 0.51 | 0.08  | 0.01 | 4.73E-15  |
| LGMN           | rs823078    | 1  | 205807330 | C | T | 0.95 | -0.11 | 0.02 | 1.41E-05  |
| LGMN           | rs35340377  | 1  | 247874908 | A | G | 0.28 | -0.07 | 0.01 | 2.33E-08  |
| LGMN           | rs35677470  | 3  | 58197909  | A | G | 0.08 | 0.13  | 0.01 | 8.61E-11  |
| LGMN           | rs6848819   | 4  | 153530526 | C | A | 0.03 | 0.14  | 0.02 | 7.77E-06  |
| LGMN           | rs1655901   | 6  | 29949027  | C | T | 0.56 | -0.05 | 0.01 | 2.43E-05  |
| LGMN           | rs1036951   | 6  | 160039050 | G | C | 0.33 | 0.06  | 0.01 | 4.21E-07  |
| LGMN           | rs17154130  | 7  | 80600168  | C | T | 0.06 | 0.12  | 0.01 | 5.73E-07  |
| LGMN           | rs4734879   | 8  | 105570896 | G | A | 0.27 | -0.12 | 0.01 | 1.95E-22  |
| LGMN           | rs2737246   | 8  | 115647351 | C | G | 0.28 | -0.05 | 0.01 | 1.44E-05  |
| LGMN           | rs6986384   | 8  | 123819941 | A | G | 0.08 | 0.10  | 0.01 | 3.17E-06  |
| LGMN           | rs7870723   | 9  | 97936960  | C | T | 0.36 | 0.05  | 0.01 | 9.03E-06  |
| LGMN           | rs600038    | 9  | 133276354 | C | T | 0.21 | -0.07 | 0.01 | 6.98E-08  |
| LGMN           | rs2250645   | 10 | 89249116  | T | C | 0.30 | 0.07  | 0.01 | 4.66E-09  |
| LGMN           | rs12767683  | 10 | 102556824 | A | C | 0.32 | 0.06  | 0.01 | 1.66E-07  |
| LGMN           | rs149871778 | 12 | 8946399   | C | G | 0.10 | 0.37  | 0.01 | 4.10E-95  |
| LGMN           | rs117566084 | 12 | 101796743 | T | C | 0.01 | 0.46  | 0.04 | 3.12E-16  |
| LGMN           | rs148659834 | 14 | 92709697  | A | G | 0.01 | -1.04 | 0.03 | 5.51E-93  |
| LGMN           | rs3026096   | 17 | 5372623   | A | G | 0.49 | -0.05 | 0.01 | 1.16E-06  |
| LGMN           | rs55976836  | 19 | 48271426  | A | G | 0.23 | -0.06 | 0.01 | 1.89E-05  |
| LGMN           | rs1654425   | 19 | 55027612  | C | T | 0.83 | 0.10  | 0.01 | 2.35E-12  |
| LHB            | rs72481571  | 14 | 105904017 | A | G | 0.11 | 0.16  | 0.01 | 2.02E-15  |
| LHB            | rs3795048   | 19 | 49017585  | T | A | 0.06 | -0.12 | 0.02 | 5.33E-07  |
| LHPP           | -           | 10 | 124470382 | G | C | 0.18 | 0.46  | 0.01 | 2.05E-230 |
| LIFR           | rs61804164  | 1  | 161653235 | C | G | 0.12 | 0.11  | 0.01 | 4.00E-11  |
| LIFR           | rs1260326   | 2  | 27508073  | C | T | 0.61 | 0.05  | 0.01 | 1.37E-05  |
| LIFR           | rs34579268  | 3  | 58424827  | T | C | 0.37 | 0.06  | 0.01 | 2.63E-07  |
| LIFR           | rs34211178  | 3  | 98664718  | A | G | 0.44 | -0.06 | 0.01 | 5.44E-07  |
| LIFR           | rs11923060  | 3  | 186871601 | T | C | 0.16 | 0.08  | 0.01 | 1.73E-07  |
| LIFR           | rs3729734   | 5  | 38527206  | A | G | 0.05 | -0.36 | 0.02 | 5.64E-42  |
| LIFR           | rs35464067  | 6  | 32591711  | C | T | 0.15 | 0.08  | 0.01 | 3.39E-06  |
| LIFR           | rs4841132   | 8  | 9326086   | G | A | 0.91 | -0.08 | 0.01 | 1.81E-05  |
| LIFR           | rs2519093   | 9  | 133266456 | T | C | 0.18 | -0.42 | 0.01 | 1.17E-184 |
| LIFR           | rs11596680  | 10 | 19919554  | G | A | 0.33 | 0.06  | 0.01 | 1.13E-06  |
| LIFR           | rs7952602   | 11 | 126363774 | C | G | 0.13 | -0.10 | 0.01 | 1.65E-09  |
| LIFR           | rs186021206 | 17 | 7166093   | A | G | 0.01 | 1.02  | 0.05 | 1.02E-41  |
| LIFR           | rs2252576   | 21 | 41243366  | T | C | 0.24 | 0.06  | 0.01 | 5.77E-06  |
| LILRA2         | rs2070901   | 1  | 161215268 | T | G | 0.27 | 0.07  | 0.01 | 5.65E-09  |
| LILRA2         | rs1257169   | 2  | 134206291 | A | C | 0.50 | -0.08 | 0.01 | 3.22E-15  |

|        |             |    |           |   |   |      |       |      |           |
|--------|-------------|----|-----------|---|---|------|-------|------|-----------|
| LILRA2 | rs140473879 | 4  | 154557913 | T | C | 0.00 | -0.99 | 0.05 | 9.22E-34  |
| LILRA2 | rs539981616 | 6  | 32651394  | G | C | 0.29 | -0.05 | 0.01 | 1.54E-05  |
| LILRA2 | rs2723509   | 7  | 17777413  | A | G | 0.41 | -0.05 | 0.01 | 6.92E-06  |
| LILRA2 | rs635634    | 9  | 133279427 | T | C | 0.18 | 0.06  | 0.01 | 6.48E-06  |
| LILRA2 | rs4055121   | 11 | 126362442 | T | C | 0.14 | -0.08 | 0.01 | 1.56E-08  |
| LILRA2 | rs3184504   | 12 | 111446804 | C | T | 0.52 | -0.07 | 0.01 | 2.87E-11  |
| LILRA2 | rs76428106  | 13 | 28029870  | C | T | 0.01 | 0.22  | 0.03 | 1.30E-06  |
| LILRA2 | rs186021206 | 17 | 7166093   | A | G | 0.01 | 0.89  | 0.04 | 1.49E-40  |
| LILRA2 | rs35866622  | 19 | 48714803  | T | C | 0.50 | 0.05  | 0.01 | 5.18E-06  |
| LILRA2 | rs10407899  | 19 | 54576244  | G | A | 0.09 | -1.00 | 0.01 | 0.00E+00  |
| LILRA5 | rs748544288 | 1  | 150635844 | C | G | 0.23 | -0.07 | 0.01 | 4.03E-07  |
| LILRA5 | rs4233366   | 1  | 161189357 | T | C | 0.27 | 0.12  | 0.01 | 1.63E-23  |
| LILRA5 | rs2019727   | 1  | 196705584 | A | T | 0.19 | 0.21  | 0.01 | 9.03E-53  |
| LILRA5 | rs597697    | 6  | 10538712  | G | A | 0.58 | 0.05  | 0.01 | 3.94E-06  |
| LILRA5 | rs9264942   | 6  | 31306603  | C | T | 0.35 | 0.05  | 0.01 | 1.60E-05  |
| LILRA5 | rs10980802  | 9  | 111156576 | G | A | 0.48 | -0.07 | 0.01 | 2.73E-11  |
| LILRA5 | rs1892548   | 13 | 40428504  | C | T | 0.66 | -0.06 | 0.01 | 6.03E-08  |
| LILRA5 | rs8033923   | 15 | 79965405  | G | A | 0.21 | -0.07 | 0.01 | 5.71E-07  |
| LILRA5 | rs186021206 | 17 | 7166093   | A | G | 0.01 | 0.40  | 0.05 | 1.01E-07  |
| LILRA5 | rs34464703  | 19 | 54302450  | G | T | 0.33 | -0.36 | 0.01 | 3.23E-205 |
| LILRA5 | rs913672    | 20 | 50290430  | G | T | 0.34 | 0.05  | 0.01 | 2.60E-05  |
| LILRB1 | rs1257169   | 2  | 134206291 | A | C | 0.50 | -0.07 | 0.01 | 1.67E-13  |
| LILRB1 | -           | 2  | 202612713 | T | A | 0.37 | 0.05  | 0.01 | 1.65E-06  |
| LILRB1 | rs27295     | 5  | 97022983  | T | C | 0.55 | -0.05 | 0.01 | 2.83E-06  |
| LILRB1 | rs9266271   | 6  | 31358305  | C | T | 0.35 | 0.20  | 0.01 | 2.19E-87  |
| LILRB1 | rs2031902   | 9  | 33117526  | T | C | 0.59 | -0.04 | 0.01 | 6.51E-06  |
| LILRB1 | rs115478735 | 9  | 133274295 | T | A | 0.18 | 0.08  | 0.01 | 1.90E-11  |
| LILRB1 | rs1072160   | 10 | 69434250  | A | G | 0.44 | 0.08  | 0.01 | 2.69E-15  |
| LILRB1 | rs75974417  | 16 | 57029582  | T | C | 0.21 | 0.06  | 0.01 | 7.42E-08  |
| LILRB1 | rs186021206 | 17 | 7166093   | A | G | 0.01 | 0.95  | 0.04 | 9.33E-49  |
| LILRB1 | rs377056194 | 19 | 10597180  | C | T | 0.09 | 0.10  | 0.01 | 3.35E-07  |
| LILRB1 | rs367070    | 19 | 54296648  | G | A | 0.23 | -0.67 | 0.01 | 0.00E+00  |
| LILRB2 | rs10801559  | 1  | 196735074 | A | G | 0.40 | -0.08 | 0.01 | 3.53E-21  |
| LILRB2 | rs9267084   | 6  | 31441828  | A | G | 0.15 | 0.14  | 0.01 | 4.25E-34  |
| LILRB2 | rs2031902   | 9  | 33117526  | T | C | 0.59 | -0.04 | 0.01 | 1.39E-05  |
| LILRB2 | rs1072160   | 10 | 69434250  | A | G | 0.44 | 0.06  | 0.01 | 4.13E-12  |
| LILRB2 | rs3184504   | 12 | 111446804 | C | T | 0.52 | -0.05 | 0.01 | 9.47E-10  |
| LILRB2 | rs72744945  | 15 | 56638995  | C | A | 0.10 | 0.06  | 0.01 | 2.04E-05  |
| LILRB2 | rs186021206 | 17 | 7166093   | A | G | 0.01 | 0.58  | 0.04 | 5.65E-26  |
| LILRB2 | rs77542162  | 17 | 69085137  | G | A | 0.02 | 0.13  | 0.02 | 5.33E-06  |
| LILRB2 | rs383925    | 19 | 54279666  | T | C | 0.21 | -1.15 | 0.01 | 0.00E+00  |
| LILRB2 | rs3747207   | 22 | 43928975  | A | G | 0.22 | 0.04  | 0.01 | 9.03E-06  |
| LILRB4 | rs9270270   | 6  | 32589431  | C | T | 0.84 | -0.73 | 0.01 | 0.00E+00  |
| LILRB4 | rs3184504   | 12 | 111446804 | C | T | 0.52 | -0.06 | 0.01 | 1.17E-08  |
| LILRB4 | rs1065853   | 19 | 44909976  | T | G | 0.08 | 0.09  | 0.01 | 1.91E-06  |
| LILRB4 | rs7247412   | 19 | 51810615  | C | T | 0.27 | -0.07 | 0.01 | 4.31E-10  |
| LILRB4 | rs417477    | 19 | 54660452  | G | A | 0.12 | 0.38  | 0.01 | 1.67E-130 |
| LILRB5 | rs2082206   | 10 | 69444867  | A | G | 0.44 | 0.05  | 0.00 | 3.62E-15  |
| LILRB5 | rs186021206 | 17 | 7166093   | A | G | 0.01 | 0.35  | 0.03 | 1.17E-17  |
| LILRB5 | rs12975366  | 19 | 54255498  | C | T | 0.40 | -1.18 | 0.01 | 0.00E+00  |
| LPCAT2 | rs79575505  | 16 | 55556698  | A | C | 0.05 | -0.25 | 0.02 | 8.59E-21  |
| LPL    | rs1260326   | 2  | 27508073  | C | T | 0.61 | 0.05  | 0.01 | 3.21E-08  |
| LPL    | rs10649609  | 2  | 164696196 | T | A | 0.37 | 0.05  | 0.01 | 1.24E-06  |
| LPL    | rs1515104   | 2  | 226227689 | A | T | 0.65 | -0.05 | 0.01 | 3.77E-07  |
| LPL    | rs72959041  | 6  | 127133748 | A | G | 0.05 | -0.10 | 0.01 | 1.69E-05  |
| LPL    | rs149522    | 7  | 130765083 | T | C | 0.40 | -0.05 | 0.01 | 6.12E-07  |

|        |             |    |           |   |   |      |       |      |           |
|--------|-------------|----|-----------|---|---|------|-------|------|-----------|
| LPL    | rs1801177   | 8  | 19948197  | A | G | 0.02 | -1.46 | 0.02 | 0.00E+00  |
| LPL    | rs2980888   | 8  | 125495066 | C | T | 0.70 | 0.05  | 0.01 | 2.29E-05  |
| LPL    | rs12600110  | 16 | 912154    | C | T | 0.38 | 0.05  | 0.01 | 5.97E-06  |
| LPL    | rs116843064 | 19 | 8364439   | A | G | 0.02 | 0.23  | 0.02 | 1.03E-10  |
| LPO    | rs61804164  | 1  | 161653235 | C | G | 0.12 | 0.08  | 0.01 | 3.73E-06  |
| LPO    | rs6703244   | 1  | 202218392 | G | A | 0.41 | 0.08  | 0.01 | 1.81E-11  |
| LPO    | rs908702    | 1  | 206932296 | T | C | 0.45 | 0.05  | 0.01 | 5.66E-06  |
| LPO    | rs9274442   | 6  | 32665454  | C | G | 0.28 | -0.08 | 0.01 | 2.68E-08  |
| LPO    | rs62418808  | 6  | 119197753 | A | G | 0.33 | -0.17 | 0.01 | 1.61E-49  |
| LPO    | rs7791463   | 7  | 98189735  | A | G | 0.54 | -0.08 | 0.01 | 1.62E-11  |
| LPO    | rs56278466  | 10 | 17833858  | G | T | 0.66 | 0.14  | 0.01 | 1.33E-31  |
| LPO    | rs1549791   | 11 | 34846421  | G | A | 0.43 | -0.05 | 0.01 | 2.71E-05  |
| LPO    | rs1427751   | 12 | 11307297  | T | C | 0.83 | -0.11 | 0.01 | 3.36E-13  |
| LPO    | rs7219860   | 17 | 58243910  | A | G | 0.22 | -0.31 | 0.01 | 1.56E-115 |
| LPO    | rs12019136  | 19 | 5835666   | A | G | 0.04 | 0.62  | 0.02 | 2.35E-105 |
| LPO    | rs34262244  | 19 | 17795098  | A | G | 0.29 | -0.07 | 0.01 | 2.01E-07  |
| LPO    | rs601338    | 19 | 48703417  | A | G | 0.51 | 0.15  | 0.01 | 1.83E-41  |
| LPO    | rs61739245  | 20 | 33289907  | T | A | 0.02 | -0.25 | 0.03 | 1.94E-09  |
| LRIG1  | rs10127775  | 1  | 230160042 | T | A | 0.61 | 0.09  | 0.01 | 9.21E-21  |
| LRIG1  | rs10182990  | 2  | 241464525 | G | T | 0.43 | -0.05 | 0.01 | 5.62E-06  |
| LRIG1  | rs2306272   | 3  | 66384219  | C | T | 0.29 | -0.86 | 0.01 | 0.00E+00  |
| LRIG1  | -           | 5  | 180805265 | G | A | 0.18 | 0.06  | 0.01 | 7.05E-06  |
| LRIG1  | rs9372538   | 6  | 119470047 | T | C | 0.28 | 0.08  | 0.01 | 8.75E-13  |
| LRIG1  | rs56278466  | 10 | 17833858  | G | T | 0.66 | 0.07  | 0.01 | 6.55E-14  |
| LRIG1  | rs11045856  | 12 | 21197755  | G | T | 0.24 | 0.08  | 0.01 | 1.30E-13  |
| LRIG1  | rs10083143  | 12 | 24045634  | C | A | 0.04 | 0.14  | 0.02 | 1.19E-07  |
| LRIG1  | rs7979473   | 12 | 120982457 | G | A | 0.62 | -0.04 | 0.01 | 2.35E-05  |
| LRIG1  | rs28929474  | 14 | 94378610  | T | C | 0.02 | 0.32  | 0.02 | 9.15E-23  |
| LRIG1  | rs339969    | 15 | 60591082  | A | C | 0.62 | 0.05  | 0.01 | 1.54E-06  |
| LRIG1  | rs17616063  | 16 | 51402971  | G | A | 0.07 | -0.08 | 0.01 | 2.52E-05  |
| LRIG1  | rs774552666 | 19 | 35062896  | A | G | 0.93 | 0.09  | 0.01 | 1.91E-06  |
| LRP1   | rs1010554   | 3  | 52508903  | C | T | 0.47 | -0.05 | 0.01 | 7.58E-06  |
| LRP1   | rs140556958 | 4  | 3294944   | A | G | 0.00 | 1.86  | 0.13 | 3.96E-22  |
| LRP1   | rs59674561  | 6  | 31435246  | T | G | 0.03 | 1.84  | 0.02 | 0.00E+00  |
| LRP1   | rs328       | 8  | 19962213  | G | C | 0.10 | -0.22 | 0.01 | 2.70E-42  |
| LRP1   | rs10820966  | 9  | 92293147  | T | A | 0.33 | -0.11 | 0.01 | 3.09E-27  |
| LRP1   | rs1935      | 10 | 63168063  | G | C | 0.47 | 0.05  | 0.01 | 2.03E-07  |
| LRP1   | rs2229498   | 10 | 69097096  | A | G | 0.84 | -0.12 | 0.01 | 1.46E-18  |
| LRP1   | rs71279465  | 11 | 126354409 | A | T | 0.30 | 0.06  | 0.01 | 1.55E-07  |
| LRP1   | rs11846959  | 14 | 94379979  | A | G | 0.25 | 0.12  | 0.01 | 1.05E-25  |
| LRP1   | rs217181    | 16 | 72080103  | T | C | 0.20 | -0.05 | 0.01 | 2.28E-05  |
| LRP1   | rs200489612 | 17 | 7203059   | A | G | 0.01 | 0.61  | 0.05 | 2.30E-16  |
| LRP1   | rs2277998   | 19 | 7766742   | A | G | 0.30 | -0.05 | 0.01 | 1.01E-05  |
| LRP1   | rs112467088 | 21 | 41507476  | T | A | 0.31 | 0.05  | 0.01 | 6.39E-07  |
| LRP11  | rs61747728  | 1  | 179557079 | T | C | 0.04 | 0.18  | 0.02 | 5.11E-11  |
| LRP11  | rs7684253   | 4  | 56861145  | T | C | 0.55 | -0.05 | 0.01 | 2.12E-05  |
| LRP11  | rs2342858   | 6  | 149805967 | T | C | 0.36 | 0.60  | 0.01 | 0.00E+00  |
| LRP11  | rs9987289   | 8  | 9325848   | G | A | 0.91 | -0.08 | 0.01 | 1.50E-05  |
| LRP11  | rs777834943 | 16 | 20355409  | T | C | 0.18 | -0.07 | 0.01 | 3.38E-07  |
| LRP11  | rs186021206 | 17 | 7166093   | A | G | 0.01 | 0.43  | 0.05 | 1.75E-09  |
| LRP11  | rs1801689   | 17 | 66214462  | C | A | 0.03 | 0.18  | 0.02 | 1.16E-09  |
| LRPAP1 | rs143486729 | 4  | 3523929   | A | G | 0.03 | -0.54 | 0.02 | 9.21E-92  |
| LRPAP1 | rs13107325  | 4  | 102267552 | T | C | 0.08 | 0.10  | 0.01 | 1.79E-07  |
| LRPAP1 | rs115881826 | 6  | 31357496  | G | A | 0.04 | 1.78  | 0.02 | 0.00E+00  |
| LRPAP1 | rs7923609   | 10 | 63374062  | G | A | 0.47 | 0.05  | 0.01 | 5.66E-08  |
| LRPAP1 | rs10895986  | 11 | 65134531  | A | C | 0.18 | -0.07 | 0.01 | 4.78E-08  |

|        |             |    |           |   |   |      |       |      |           |
|--------|-------------|----|-----------|---|---|------|-------|------|-----------|
| LRPAP1 | rs117654599 | 12 | 123743753 | A | T | 0.01 | 0.31  | 0.03 | 3.21E-12  |
| LRPAP1 | rs11846959  | 14 | 94379979  | A | G | 0.25 | 0.07  | 0.01 | 3.76E-11  |
| LRRC25 | rs1260326   | 2  | 27508073  | C | T | 0.61 | 0.05  | 0.01 | 2.51E-05  |
| LRRC25 | rs4672491   | 2  | 62284452  | G | T | 0.52 | -0.07 | 0.01 | 5.42E-11  |
| LRRC25 | rs13388024  | 2  | 218233050 | G | A | 0.50 | -0.05 | 0.01 | 6.64E-06  |
| LRRC25 | rs2470750   | 3  | 98971748  | T | A | 0.39 | -0.21 | 0.01 | 8.12E-83  |
| LRRC25 | rs13107325  | 4  | 102267552 | T | C | 0.08 | -0.14 | 0.01 | 2.46E-12  |
| LRRC25 | rs509227    | 6  | 10535358  | C | A | 0.52 | 0.29  | 0.01 | 3.54E-165 |
| LRRC25 | rs2858331   | 6  | 32713500  | G | A | 0.37 | -0.08 | 0.01 | 4.16E-13  |
| LRRC25 | rs12667978  | 7  | 129137407 | T | C | 0.57 | -0.14 | 0.01 | 1.59E-40  |
| LRRC25 | rs199922514 | 8  | 9325592   | G | A | 0.91 | -0.09 | 0.01 | 9.69E-07  |
| LRRC25 | -           | 9  | 133263362 | G | A | 0.18 | 0.06  | 0.01 | 2.13E-05  |
| LRRC25 | -           | 10 | 80523403  | A | T | 0.73 | 0.06  | 0.01 | 1.64E-06  |
| LRRC25 | rs950802    | 11 | 60385111  | A | G | 0.31 | 0.17  | 0.01 | 3.99E-51  |
| LRRC25 | rs4055121   | 11 | 126362442 | T | C | 0.13 | -0.08 | 0.01 | 1.30E-07  |
| LRRC25 | rs186021206 | 17 | 7166093   | A | G | 0.01 | 1.05  | 0.05 | 2.09E-47  |
| LRRC25 | rs2659005   | 17 | 81244914  | T | C | 0.44 | 0.08  | 0.01 | 8.18E-13  |
| LRRC25 | rs754032589 | 19 | 18402007  | T | A | 0.41 | -0.34 | 0.01 | 9.21E-210 |
| LRRC25 | rs4893      | 19 | 48330351  | G | A | 0.04 | -0.45 | 0.02 | 7.31E-60  |
| LRRN1  | rs9839475   | 3  | 3766094   | A | G | 0.35 | 0.81  | 0.01 | 0.00E+00  |
| LRRN1  | rs11443126  | 5  | 53980126  | A | C | 0.69 | 0.05  | 0.01 | 1.70E-05  |
| LRRN1  | rs3941888   | 6  | 109251208 | A | G | 0.31 | -0.05 | 0.01 | 7.74E-06  |
| LRRN1  | rs1405212   | 6  | 117169501 | C | T | 0.63 | -0.06 | 0.01 | 1.94E-10  |
| LRRN1  | rs11414746  | 9  | 33150411  | A | T | 0.42 | 0.05  | 0.01 | 3.23E-06  |
| LRRN1  | rs55861089  | 11 | 1762527   | G | A | 0.11 | -0.11 | 0.01 | 4.59E-12  |
| LRRN1  | rs594144    | 11 | 75015783  | T | C | 0.47 | 0.05  | 0.01 | 1.14E-06  |
| LRRN1  | rs6496452   | 15 | 84829414  | T | A | 0.45 | 0.04  | 0.01 | 1.08E-05  |
| LSP1   | rs907612    | 11 | 1852991   | T | C | 0.38 | 0.15  | 0.01 | 3.55E-38  |
| LSP1   | rs12941811  | 17 | 40003082  | C | T | 0.58 | -0.05 | 0.01 | 2.38E-06  |
| LTA    | rs2009581   | 2  | 111050100 | A | G | 0.27 | -0.07 | 0.01 | 3.65E-11  |
| LTA    | rs58106596  | 2  | 231714669 | A | G | 0.22 | 0.06  | 0.01 | 1.39E-07  |
| LTA    | rs2229092   | 6  | 31572980  | C | A | 0.06 | -1.49 | 0.01 | 0.00E+00  |
| LTA    | rs764024035 | 12 | 6395606   | G | T | 0.17 | 0.18  | 0.01 | 1.39E-46  |
| LTA    | rs3184504   | 12 | 111446804 | C | T | 0.52 | -0.15 | 0.01 | 1.02E-55  |
| LTA    | rs186021206 | 17 | 7166093   | A | G | 0.01 | 0.32  | 0.04 | 9.68E-07  |
| LTA    | rs34557412  | 17 | 16948873  | G | A | 0.01 | 0.45  | 0.04 | 3.60E-15  |
| LTA    | rs8071789   | 17 | 39850080  | T | C | 0.49 | -0.04 | 0.01 | 1.86E-05  |
| LTA    | rs344560    | 19 | 6665009   | C | T | 0.95 | 0.16  | 0.01 | 6.04E-15  |
| LTA    | rs6073290   | 20 | 44030119  | G | A | 0.70 | 0.05  | 0.01 | 8.87E-06  |
| LTA    | rs738409    | 22 | 43928847  | G | C | 0.22 | 0.06  | 0.01 | 1.17E-06  |
| LTA4H  | rs2540486   | 12 | 96037229  | G | C | 0.35 | 0.10  | 0.01 | 8.20E-18  |
| LTBP2  | rs4920605   | 1  | 16988930  | A | G | 0.57 | 0.07  | 0.01 | 6.73E-14  |
| LTBP2  | rs333947    | 1  | 109928142 | A | G | 0.15 | -0.06 | 0.01 | 4.75E-06  |
| LTBP2  | rs61801010  | 1  | 161572445 | G | A | 0.11 | 0.08  | 0.01 | 3.67E-07  |
| LTBP2  | rs6973480   | 7  | 17938506  | T | C | 0.52 | 0.05  | 0.01 | 3.07E-07  |
| LTBP2  | rs748386792 | 10 | 63542085  | T | G | 0.46 | 0.05  | 0.01 | 5.64E-06  |
| LTBP2  | rs3751198   | 12 | 103753429 | G | A | 0.60 | 0.08  | 0.01 | 2.69E-17  |
| LTBP2  | rs888414    | 14 | 74638202  | A | G | 0.38 | -0.10 | 0.01 | 9.59E-26  |
| LTBP2  | rs1036477   | 15 | 48622729  | G | A | 0.10 | -0.08 | 0.01 | 1.53E-06  |
| LTBP2  | rs200489612 | 17 | 7203059   | A | G | 0.01 | 0.65  | 0.05 | 4.64E-20  |
| LTBP3  | rs746777507 | 2  | 53642581  | T | A | 0.20 | 0.06  | 0.01 | 1.67E-05  |
| LTBP3  | rs376096585 | 2  | 55867443  | T | C | 0.22 | 0.06  | 0.01 | 1.93E-06  |
| LTBP3  | rs6718159   | 2  | 203198007 | A | T | 0.56 | -0.05 | 0.01 | 4.86E-06  |
| LTBP3  | rs140336797 | 5  | 96970610  | T | A | 0.43 | 0.06  | 0.01 | 6.22E-08  |
| LTBP3  | rs4099470   | 11 | 65552515  | T | C | 0.05 | 0.90  | 0.02 | 3.31E-295 |
| LTBP3  | rs28929474  | 14 | 94378610  | T | C | 0.02 | 0.26  | 0.02 | 2.46E-12  |

|       |             |    |           |   |   |      |       |      |           |
|-------|-------------|----|-----------|---|---|------|-------|------|-----------|
| LTBP3 | rs77303550  | 16 | 72045758  | T | C | 0.20 | -0.07 | 0.01 | 4.77E-07  |
| LTBP3 | rs1801689   | 17 | 66214462  | C | A | 0.03 | 0.72  | 0.02 | 2.67E-121 |
| LTBP3 | rs73045269  | 19 | 41319286  | T | C | 0.17 | 0.15  | 0.01 | 6.48E-26  |
| LTBR  | rs61747728  | 1  | 179557079 | T | C | 0.04 | 0.20  | 0.02 | 7.99E-13  |
| LTBR  | rs1260326   | 2  | 27508073  | C | T | 0.61 | 0.07  | 0.01 | 1.25E-09  |
| LTBR  | rs75166367  | 2  | 162107791 | A | G | 0.06 | -0.10 | 0.01 | 1.79E-05  |
| LTBR  | rs12613853  | 2  | 178132920 | G | A | 0.38 | 0.05  | 0.01 | 1.09E-05  |
| LTBR  | rs1434055   | 2  | 203222136 | A | G | 0.56 | -0.06 | 0.01 | 2.44E-08  |
| LTBR  | rs27295     | 5  | 97022983  | T | C | 0.55 | -0.05 | 0.01 | 1.18E-05  |
| LTBR  | -           | 6  | 31434889  | T | C | 0.31 | 0.07  | 0.01 | 1.92E-09  |
| LTBR  | rs10849449  | 12 | 6389496   | G | A | 0.65 | -0.31 | 0.01 | 9.39E-154 |
| LTBR  | rs966541    | 12 | 29338595  | G | A | 0.28 | 0.08  | 0.01 | 2.70E-09  |
| LTBR  | rs28929474  | 14 | 94378610  | T | C | 0.02 | 0.95  | 0.03 | 1.57E-135 |
| LTBR  | rs77924615  | 16 | 20381010  | A | G | 0.20 | -0.08 | 0.01 | 9.46E-08  |
| LTBR  | rs1801689   | 17 | 66214462  | C | A | 0.03 | 0.15  | 0.02 | 1.89E-06  |
| LTBR  | rs123698    | 19 | 807442    | C | G | 0.61 | 0.06  | 0.01 | 1.39E-08  |
| LTBR  | rs1137844   | 19 | 35852177  | G | C | 0.32 | 0.05  | 0.01 | 2.37E-05  |
| LXN   | rs6785524   | 3  | 158619442 | A | C | 0.53 | -0.17 | 0.01 | 8.38E-49  |
| LXN   | rs55636108  | 3  | 186663473 | C | T | 0.21 | 0.08  | 0.01 | 5.60E-08  |
| LY6D  | rs61816761  | 1  | 152313385 | A | G | 0.02 | 0.32  | 0.02 | 1.22E-17  |
| LY6D  | rs2870238   | 4  | 76451926  | T | C | 0.50 | 0.05  | 0.01 | 8.30E-06  |
| LY6D  | rs2572925   | 8  | 142786489 | T | C | 0.40 | -0.44 | 0.01 | 0.00E+00  |
| LY6D  | rs77924615  | 16 | 20381010  | A | G | 0.20 | -0.07 | 0.01 | 3.12E-07  |
| LY6D  | rs761061860 | 19 | 38280727  | G | C | 0.17 | -0.06 | 0.01 | 1.97E-05  |
| LY6D  | rs56035820  | 19 | 51016454  | T | C | 0.23 | 0.06  | 0.01 | 2.11E-06  |
| LY75  | rs72957586  | 2  | 159906176 | A | G | 0.56 | 0.93  | 0.01 | 0.00E+00  |
| LY75  | rs34794906  | 6  | 31270081  | C | T | 0.26 | 0.05  | 0.01 | 1.12E-07  |
| LY75  | rs1137827   | 9  | 133254328 | T | C | 0.06 | 0.10  | 0.01 | 1.29E-08  |
| LY75  | rs12574844  | 11 | 126403491 | A | G | 0.07 | -0.10 | 0.01 | 2.06E-10  |
| LY75  | rs3184504   | 12 | 111446804 | C | T | 0.52 | -0.06 | 0.01 | 2.85E-12  |
| LY75  | rs3213572   | 12 | 120767275 | A | G | 0.47 | -0.03 | 0.01 | 2.72E-05  |
| LY75  | rs186021206 | 17 | 7166093   | A | G | 0.01 | 0.94  | 0.04 | 4.09E-67  |
| LY9   | rs188468174 | 1  | 24965206  | T | C | 0.01 | -0.25 | 0.03 | 5.48E-07  |
| LY9   | rs37455     | 1  | 43828556  | G | A | 0.35 | 0.07  | 0.01 | 5.59E-09  |
| LY9   | rs12128261  | 1  | 160792994 | G | T | 0.22 | 0.60  | 0.01 | 0.00E+00  |
| LY9   | rs2009581   | 2  | 111050100 | A | G | 0.27 | -0.06 | 0.01 | 1.53E-07  |
| LY9   | rs9824474   | 3  | 170027739 | G | A | 0.37 | -0.06 | 0.01 | 9.79E-07  |
| LY9   | rs7634389   | 3  | 187020633 | C | T | 0.39 | -0.07 | 0.01 | 9.45E-11  |
| LY9   | rs35829610  | 5  | 132488170 | G | C | 0.34 | -0.06 | 0.01 | 1.06E-07  |
| LY9   | -           | 6  | 29866672  | G | A | 0.54 | -0.05 | 0.01 | 1.27E-06  |
| LY9   | rs11185602  | 7  | 50259481  | G | A | 0.33 | -0.05 | 0.01 | 8.12E-06  |
| LY9   | rs778224678 | 7  | 151256873 | G | T | 0.11 | 0.08  | 0.01 | 4.06E-06  |
| LY9   | rs505922    | 9  | 133273813 | C | T | 0.32 | 0.06  | 0.01 | 1.47E-06  |
| LY9   | rs75071241  | 11 | 126362291 | A | G | 0.06 | -0.11 | 0.01 | 3.68E-06  |
| LY9   | rs3184504   | 12 | 111446804 | C | T | 0.52 | -0.12 | 0.01 | 6.44E-32  |
| LY9   | rs34949455  | 12 | 120762594 | C | T | 0.50 | -0.05 | 0.01 | 2.60E-05  |
| LY9   | rs76428106  | 13 | 28029870  | C | T | 0.01 | 0.27  | 0.03 | 8.48E-08  |
| LY9   | rs186021206 | 17 | 7166093   | A | G | 0.01 | 1.04  | 0.05 | 5.67E-47  |
| LY9   | rs2725405   | 17 | 81246424  | C | G | 0.44 | 0.08  | 0.01 | 8.53E-14  |
| LY96  | rs188468174 | 1  | 24965206  | T | C | 0.01 | -0.48 | 0.03 | 9.66E-24  |
| LY96  | rs35668054  | 2  | 71827707  | T | C | 0.08 | -0.12 | 0.01 | 1.98E-07  |
| LY96  | -           | 3  | 177083309 | A | C | 0.10 | -0.08 | 0.01 | 8.52E-06  |
| LY96  | rs67612510  | 6  | 32558659  | A | G | 0.54 | -0.08 | 0.01 | 1.06E-08  |
| LY96  | rs3804333   | 6  | 106279340 | T | C | 0.20 | -0.06 | 0.01 | 1.06E-05  |
| LY96  | rs6472812   | 8  | 74004849  | G | A | 0.96 | -0.20 | 0.02 | 2.58E-13  |
| LY96  | rs3181356   | 9  | 114930602 | T | C | 0.23 | 0.06  | 0.01 | 5.51E-06  |



|        |             |    |           |   |   |      |       |      |           |
|--------|-------------|----|-----------|---|---|------|-------|------|-----------|
| LY96   | rs7943728   | 11 | 61779596  | A | G | 0.19 | 0.08  | 0.01 | 2.23E-08  |
| LY96   | rs3184504   | 12 | 111446804 | C | T | 0.52 | -0.06 | 0.01 | 1.60E-07  |
| LY96   | rs117775520 | 14 | 105707884 | A | G | 0.04 | -0.19 | 0.02 | 3.78E-10  |
| LY96   | rs3803800   | 17 | 7559652   | G | A | 0.79 | -0.08 | 0.01 | 5.24E-09  |
| LY96   | rs34557412  | 17 | 16948873  | G | A | 0.01 | -0.47 | 0.04 | 1.27E-11  |
| LY96   | rs5763821   | 22 | 30153082  | C | A | 0.39 | -0.06 | 0.01 | 7.72E-08  |
| LYAR   | rs11723339  | 4  | 4270159   | T | C | 0.62 | -0.05 | 0.01 | 1.40E-05  |
| LYN    | rs1354034   | 3  | 56815721  | C | T | 0.60 | 0.06  | 0.01 | 1.60E-06  |
| LYN    | rs2055663   | 4  | 82639526  | C | T | 0.86 | -0.09 | 0.01 | 5.56E-08  |
| LYN    | rs3847326   | 10 | 63572099  | G | A | 0.48 | -0.05 | 0.01 | 1.80E-05  |
| LYN    | rs2186882   | 11 | 119297660 | A | G | 0.27 | 0.07  | 0.01 | 3.76E-08  |
| LYN    | rs1613662   | 19 | 55025227  | A | G | 0.83 | 0.07  | 0.01 | 2.28E-05  |
| LYPD3  | rs1260326   | 2  | 27508073  | C | T | 0.61 | 0.05  | 0.01 | 4.76E-06  |
| LYPD3  | rs1047891   | 2  | 210675783 | A | C | 0.31 | 0.05  | 0.01 | 5.07E-06  |
| LYPD3  | rs13107325  | 4  | 102267552 | T | C | 0.08 | 0.08  | 0.01 | 2.78E-05  |
| LYPD3  | rs2479016   | 6  | 2245111   | G | A | 0.43 | -0.08 | 0.01 | 2.50E-13  |
| LYPD3  | rs112155110 | 6  | 32533640  | T | C | 0.40 | -0.05 | 0.01 | 1.22E-06  |
| LYPD3  | rs7842080   | 8  | 133587086 | G | A | 0.22 | 0.18  | 0.01 | 1.54E-44  |
| LYPD3  | -           | 9  | 36291499  | A | T | 0.43 | -0.06 | 0.01 | 6.01E-08  |
| LYPD3  | rs2519093   | 9  | 133266456 | T | C | 0.18 | -0.15 | 0.01 | 3.13E-28  |
| LYPD3  | rs56278466  | 10 | 17833858  | G | T | 0.66 | 0.05  | 0.01 | 1.79E-05  |
| LYPD3  | rs139130389 | 11 | 72139110  | A | C | 0.07 | -0.47 | 0.01 | 1.32E-124 |
| LYPD3  | rs10893502  | 11 | 126384123 | C | T | 0.59 | -0.07 | 0.01 | 1.59E-11  |
| LYPD3  | rs2286783   | 12 | 519503    | A | G | 0.40 | 0.05  | 0.01 | 5.97E-06  |
| LYPD3  | -           | 12 | 123993829 | T | C | 0.31 | 0.06  | 0.01 | 2.48E-07  |
| LYPD3  | rs56990244  | 16 | 377999    | G | C | 0.59 | -0.10 | 0.01 | 6.11E-21  |
| LYPD3  | rs62034713  | 16 | 3309124   | G | A | 0.25 | 0.16  | 0.01 | 2.22E-41  |
| LYPD3  | rs186021206 | 17 | 7166093   | A | G | 0.01 | 0.97  | 0.05 | 7.53E-43  |
| LYPD3  | rs276937    | 18 | 31031095  | T | A | 0.32 | 0.13  | 0.01 | 9.96E-32  |
| LYPD3  | rs708686    | 19 | 5840608   | T | C | 0.27 | 0.08  | 0.01 | 2.66E-11  |
| LYPD3  | rs7257767   | 19 | 43497193  | T | C | 0.11 | -0.52 | 0.01 | 1.55E-198 |
| LYPD3  | rs601338    | 19 | 48703417  | A | G | 0.51 | 0.26  | 0.01 | 1.99E-123 |
| LYPD3  | rs383510    | 21 | 41486440  | C | T | 0.51 | -0.08 | 0.01 | 4.27E-14  |
| LYPD8  | rs12729620  | 1  | 20691678  | G | A | 0.06 | 1.06  | 0.02 | 0.00E+00  |
| LYPD8  | rs12046713  | 1  | 55564598  | T | C | 0.09 | 0.84  | 0.01 | 0.00E+00  |
| LYPD8  | rs12022008  | 1  | 110298586 | C | T | 0.09 | 0.91  | 0.01 | 0.00E+00  |
| LYPD8  | rs28768088  | 1  | 133200121 | C | T | 0.09 | 0.84  | 0.01 | 0.00E+00  |
| LYPD8  | rs12044252  | 1  | 248771492 | C | T | 0.09 | 0.84  | 0.01 | 0.00E+00  |
| LYPD8  | rs4556017   | 7  | 100989509 | T | C | 0.85 | -0.08 | 0.01 | 8.57E-07  |
| LYPD8  | -           | 9  | 133263362 | G | A | 0.18 | -0.13 | 0.01 | 2.55E-22  |
| LYPD8  | rs11220520  | 11 | 126488013 | T | C | 0.19 | 0.10  | 0.01 | 1.56E-14  |
| LYPD8  | rs186021206 | 17 | 7166093   | A | G | 0.01 | 0.56  | 0.05 | 4.78E-14  |
| LYPD8  | rs73338360  | 17 | 49193845  | C | G | 0.10 | 0.12  | 0.01 | 7.51E-12  |
| LYPD8  | rs708686    | 19 | 5840608   | T | C | 0.27 | 0.17  | 0.01 | 2.20E-43  |
| LYPD8  | rs4760      | 19 | 43648948  | G | A | 0.16 | -0.11 | 0.01 | 4.52E-14  |
| MAD1L1 | rs143579216 | 7  | 2225428   | A | G | 0.00 | 1.27  | 0.07 | 1.15E-28  |
| MAGED1 | rs1354034   | 3  | 56815721  | C | T | 0.60 | 0.06  | 0.01 | 3.96E-07  |
| MAGED1 | rs342293    | 7  | 106731773 | G | C | 0.46 | -0.08 | 0.01 | 9.97E-11  |
| MANF   | rs11721253  | 3  | 51513203  | G | A | 0.86 | 0.09  | 0.01 | 2.05E-08  |
| MANF   | rs1354034   | 3  | 56815721  | C | T | 0.60 | 0.06  | 0.01 | 5.84E-08  |
| MANF   | rs3804749   | 3  | 123114156 | T | C | 0.59 | -0.05 | 0.01 | 2.04E-05  |
| MANF   | rs342298    | 7  | 106733200 | T | C | 0.45 | -0.06 | 0.01 | 5.37E-08  |
| MANF   | rs6993770   | 8  | 105569300 | T | A | 0.29 | -0.06 | 0.01 | 9.84E-06  |
| MANF   | -           | 10 | 63156270  | A | T | 0.49 | 0.06  | 0.01 | 1.28E-06  |
| MANF   | rs892090    | 19 | 55027704  | G | T | 0.83 | 0.07  | 0.01 | 6.89E-06  |
| MANSC1 | rs3917932   | 1  | 36478315  | G | C | 0.58 | -0.06 | 0.01 | 1.44E-06  |

|        |             |    |           |   |   |      |       |      |           |
|--------|-------------|----|-----------|---|---|------|-------|------|-----------|
| MANSC1 | rs61747728  | 1  | 179557079 | T | C | 0.04 | 0.18  | 0.02 | 1.22E-09  |
| MANSC1 | rs1260326   | 2  | 27508073  | C | T | 0.61 | 0.08  | 0.01 | 4.76E-12  |
| MANSC1 | rs75166367  | 2  | 162107791 | A | G | 0.06 | -0.12 | 0.02 | 3.98E-07  |
| MANSC1 | rs11721168  | 3  | 58422952  | A | G | 0.38 | 0.06  | 0.01 | 4.22E-06  |
| MANSC1 | rs112926042 | 4  | 724801    | T | C | 0.31 | 0.06  | 0.01 | 8.15E-06  |
| MANSC1 | -           | 4  | 186236113 | C | A | 0.51 | -0.07 | 0.01 | 4.32E-10  |
| MANSC1 | rs3130508   | 6  | 31181743  | A | G | 0.26 | 0.07  | 0.01 | 2.87E-07  |
| MANSC1 | rs11137085  | 8  | 7019946   | C | G | 0.38 | 0.06  | 0.01 | 3.32E-07  |
| MANSC1 | -           | 9  | 133263362 | G | A | 0.18 | -0.10 | 0.01 | 8.82E-11  |
| MANSC1 | rs1059091   | 11 | 309127    | G | A | 0.32 | -0.06 | 0.01 | 1.62E-06  |
| MANSC1 | rs73017394  | 11 | 126311952 | A | C | 0.24 | -0.14 | 0.01 | 3.40E-25  |
| MANSC1 | rs3053800   | 12 | 12346197  | G | C | 0.50 | 0.05  | 0.01 | 1.32E-05  |
| MANSC1 | rs9506687   | 13 | 21461663  | A | G | 0.27 | 0.06  | 0.01 | 5.38E-06  |
| MANSC1 | rs72756918  | 15 | 64185880  | A | G | 0.12 | 0.08  | 0.01 | 1.16E-05  |
| MANSC1 | rs4997081   | 16 | 20353912  | C | G | 0.19 | -0.07 | 0.01 | 2.60E-06  |
| MANSC1 | rs186021206 | 17 | 7166093   | A | G | 0.01 | 0.72  | 0.05 | 1.99E-20  |
| MANSC1 | rs6503533   | 17 | 40028327  | T | C | 0.62 | -0.07 | 0.01 | 1.44E-08  |
| MANSC1 | rs55715868  | 17 | 81301025  | G | A | 0.54 | -0.06 | 0.01 | 3.23E-06  |
| MANSC1 | -           | 19 | 836186    | C | A | 0.26 | 0.09  | 0.01 | 1.20E-11  |
| MANSC1 | rs36013629  | 19 | 49539610  | G | T | 0.25 | 0.06  | 0.01 | 1.99E-05  |
| MAP2K6 | rs342298    | 7  | 106733200 | T | C | 0.46 | -0.06 | 0.01 | 9.68E-08  |
| MAP2K6 | rs3847326   | 10 | 63572099  | G | A | 0.48 | -0.06 | 0.01 | 3.07E-07  |
| MAP2K6 | rs60822569  | 12 | 54323724  | C | T | 0.55 | 0.05  | 0.01 | 9.06E-06  |
| MAP3K5 | rs1354034   | 3  | 56815721  | C | T | 0.60 | 0.06  | 0.01 | 1.85E-06  |
| MAP4K5 | rs3811444   | 1  | 247876149 | T | C | 0.33 | -0.06 | 0.01 | 7.73E-06  |
| MAP4K5 | rs342293    | 7  | 106731773 | G | C | 0.46 | -0.05 | 0.01 | 2.57E-05  |
| MAP4K5 | rs17780143  | 14 | 50435050  | A | G | 0.06 | -0.38 | 0.02 | 2.63E-54  |
| MAPK9  | rs3763131   | 5  | 180307312 | C | T | 0.20 | 0.14  | 0.01 | 8.64E-24  |
| MARCO  | rs12740374  | 1  | 109274968 | T | G | 0.22 | -0.13 | 0.01 | 1.37E-22  |
| MARCO  | rs4672487   | 2  | 62268110  | G | T | 0.57 | -0.09 | 0.01 | 1.12E-15  |
| MARCO  | rs35288880  | 2  | 118970896 | T | C | 0.16 | -0.35 | 0.01 | 1.07E-117 |
| MARCO  | rs62165726  | 2  | 134208991 | A | C | 0.04 | -0.36 | 0.02 | 4.48E-34  |
| MARCO  | rs2470750   | 3  | 98971748  | T | A | 0.39 | -0.07 | 0.01 | 6.30E-10  |
| MARCO  | rs112125244 | 5  | 132477205 | G | T | 0.29 | -0.06 | 0.01 | 1.35E-06  |
| MARCO  | -           | 6  | 105909664 | C | T | 0.52 | -0.09 | 0.01 | 8.52E-18  |
| MARCO  | rs12667978  | 7  | 129137407 | T | C | 0.57 | 0.05  | 0.01 | 2.37E-06  |
| MARCO  | -           | 11 | 44570719  | T | A | 0.78 | 0.07  | 0.01 | 3.56E-07  |
| MARCO  | rs73338697  | 14 | 94516256  | A | G | 0.01 | -0.31 | 0.04 | 3.35E-06  |
| MARCO  | rs11861563  | 16 | 75175892  | A | G | 0.59 | -0.06 | 0.01 | 8.46E-08  |
| MARCO  | rs186021206 | 17 | 7166093   | A | G | 0.01 | 1.10  | 0.05 | 4.26E-50  |
| MARCO  | -           | 19 | 55313449  | C | G | 0.39 | 0.05  | 0.01 | 1.14E-05  |
| MASP1  | rs12136468  | 1  | 11039731  | A | G | 0.79 | 0.12  | 0.01 | 2.26E-20  |
| MASP1  | -           | 1  | 27373179  | A | G | 0.01 | -1.17 | 0.03 | 4.30E-143 |
| MASP1  | rs3820897   | 2  | 3594771   | C | T | 0.82 | 0.19  | 0.01 | 5.42E-41  |
| MASP1  | rs1486236   | 2  | 179874723 | A | C | 0.37 | 0.32  | 0.01 | 2.00E-168 |
| MASP1  | rs698090    | 3  | 187246512 | T | C | 0.64 | 0.21  | 0.01 | 3.24E-77  |
| MASP1  | rs9987289   | 8  | 9325848   | G | A | 0.91 | -0.09 | 0.01 | 3.98E-06  |
| MASP1  | rs41341748  | 8  | 16155085  | A | G | 0.01 | 0.27  | 0.03 | 4.14E-07  |
| MASP1  | rs10104003  | 8  | 54509880  | T | C | 0.21 | 0.10  | 0.01 | 2.69E-14  |
| MASP1  | rs7899547   | 10 | 52777079  | G | T | 0.65 | 0.13  | 0.01 | 1.70E-32  |
| MASP1  | rs4926      | 11 | 57614516  | A | G | 0.27 | -0.09 | 0.01 | 1.65E-13  |
| MASP1  | rs215223    | 12 | 481093    | A | G | 0.40 | -0.10 | 0.01 | 1.23E-19  |
| MASP1  | rs6118      | 14 | 94587526  | T | C | 0.10 | 0.10  | 0.01 | 4.63E-08  |
| MASP1  | rs704       | 17 | 28367840  | A | G | 0.47 | -0.07 | 0.01 | 6.69E-11  |
| MASP1  | rs9944724   | 18 | 62517378  | G | T | 0.38 | 0.06  | 0.01 | 8.55E-08  |
| MATN2  | rs13159365  | 5  | 136053744 | T | C | 0.51 | 0.08  | 0.01 | 2.31E-14  |

|       |             |    |           |   |   |      |       |      |           |
|-------|-------------|----|-----------|---|---|------|-------|------|-----------|
| MATN2 | rs2685412   | 8  | 27953086  | G | C | 0.27 | 0.25  | 0.01 | 4.34E-93  |
| MATN2 | rs1869609   | 8  | 97978993  | G | A | 0.66 | 0.39  | 0.01 | 6.69E-252 |
| MATN2 | rs35157100  | 9  | 115138014 | A | G | 0.29 | -0.17 | 0.01 | 1.75E-46  |
| MATN2 | rs5786398   | 10 | 79383631  | T | C | 0.38 | 0.05  | 0.01 | 1.98E-05  |
| MATN2 | rs2269434   | 11 | 47338861  | C | T | 0.35 | 0.05  | 0.01 | 5.64E-06  |
| MATN2 | rs77542162  | 17 | 69085137  | G | A | 0.02 | 0.16  | 0.02 | 1.09E-05  |
| MATN3 | rs11694716  | 2  | 20007858  | A | G | 0.64 | -0.56 | 0.01 | 0.00E+00  |
| MATN3 | rs66530140  | 4  | 186240057 | C | T | 0.51 | -0.06 | 0.01 | 6.83E-08  |
| MATN3 | rs2519093   | 9  | 133266456 | T | C | 0.18 | -0.08 | 0.01 | 1.56E-10  |
| MATN3 | rs11657101  | 17 | 62559465  | A | G | 0.36 | -0.12 | 0.01 | 1.11E-29  |
| MAVS  | rs1354034   | 3  | 56815721  | C | T | 0.60 | 0.05  | 0.01 | 2.78E-05  |
| MAVS  | rs7080386   | 10 | 63288546  | A | C | 0.41 | 0.05  | 0.01 | 3.29E-06  |
| MAVS  | rs45437096  | 20 | 3864282   | T | C | 0.14 | -0.13 | 0.01 | 2.25E-15  |
| MAX   | rs17622656  | 5  | 132485305 | A | G | 0.39 | -0.06 | 0.01 | 5.74E-07  |
| MAX   | rs342298    | 7  | 106733200 | T | C | 0.45 | -0.05 | 0.01 | 7.39E-06  |
| MAX   | rs6993770   | 8  | 105569300 | T | A | 0.29 | -0.06 | 0.01 | 2.59E-05  |
| MAX   | rs7896518   | 10 | 63344740  | G | A | 0.42 | 0.06  | 0.01 | 1.25E-06  |
| MAX   | rs60822569  | 12 | 54323724  | C | T | 0.55 | 0.05  | 0.01 | 2.49E-05  |
| MAX   | rs8005829   | 14 | 65109447  | T | C | 0.58 | 0.08  | 0.01 | 2.73E-11  |
| MAX   | rs12588296  | 14 | 106627735 | C | A | 0.25 | -0.07 | 0.01 | 1.25E-06  |
| MAX   | rs200309755 | 17 | 29518756  | T | C | 0.54 | 0.05  | 0.01 | 1.87E-05  |
| MB    | rs12463674  | 2  | 178567458 | G | A | 0.32 | 0.07  | 0.01 | 1.72E-11  |
| MB    | rs2151597   | 9  | 100581119 | A | G | 0.44 | 0.05  | 0.01 | 9.57E-07  |
| MB    | rs17099139  | 10 | 119659975 | G | C | 0.27 | 0.05  | 0.01 | 1.08E-05  |
| MB    | rs7481951   | 11 | 22250324  | T | A | 0.59 | 0.07  | 0.01 | 2.72E-11  |
| MB    | rs1028883   | 13 | 73534450  | G | T | 0.57 | 0.06  | 0.01 | 1.96E-09  |
| MB    | rs4901541   | 14 | 54768564  | T | C | 0.56 | -0.05 | 0.01 | 2.39E-07  |
| MB    | rs1799938   | 17 | 67056188  | A | G | 0.11 | 0.07  | 0.01 | 1.88E-05  |
| MB    | rs41155     | 22 | 30008558  | C | A | 0.59 | 0.05  | 0.01 | 1.01E-05  |
| MCAM  | rs1260326   | 2  | 27508073  | C | T | 0.61 | 0.07  | 0.01 | 6.45E-10  |
| MCAM  | rs13107325  | 4  | 102267552 | T | C | 0.08 | 0.11  | 0.01 | 5.25E-07  |
| MCAM  | rs41289902  | 6  | 112139163 | T | C | 0.01 | 0.49  | 0.03 | 5.23E-27  |
| MCAM  | rs8176693   | 9  | 133262254 | T | C | 0.06 | 0.23  | 0.01 | 3.56E-24  |
| MCAM  | rs34587557  | 11 | 119314967 | C | T | 0.05 | -0.31 | 0.02 | 8.87E-37  |
| MCAM  | rs11220462  | 11 | 126374057 | A | G | 0.13 | -0.10 | 0.01 | 1.07E-09  |
| MCAM  | rs7310615   | 12 | 111427245 | G | C | 0.52 | 0.06  | 0.01 | 5.21E-07  |
| MCAM  | rs186021206 | 17 | 7166093   | A | G | 0.01 | 0.96  | 0.05 | 1.31E-38  |
| MCAM  | rs2006987   | 22 | 39459077  | C | T | 0.75 | -0.07 | 0.01 | 2.07E-08  |
| MCFD2 | rs6419615   | 2  | 46925152  | C | G | 0.71 | -0.14 | 0.01 | 7.83E-30  |
| MCFD2 | rs6993770   | 8  | 105569300 | T | A | 0.29 | -0.08 | 0.01 | 1.06E-09  |
| MCFD2 | rs112635299 | 14 | 94371805  | T | G | 0.02 | 0.34  | 0.03 | 6.03E-18  |
| MCFD2 | rs17696641  | 18 | 59348568  | A | T | 0.15 | 0.08  | 0.01 | 2.68E-07  |
| MDGA1 | rs9349050   | 6  | 37695848  | C | T | 0.51 | -1.08 | 0.01 | 0.00E+00  |
| MDGA1 | rs9987289   | 8  | 9325848   | G | A | 0.91 | -0.06 | 0.01 | 5.96E-07  |
| MDGA1 | rs35887873  | 11 | 126349501 | C | T | 0.23 | 0.07  | 0.01 | 1.21E-16  |
| MDGA1 | rs186021206 | 17 | 7166093   | A | G | 0.01 | 0.50  | 0.03 | 2.66E-24  |
| MDGA1 | rs77542162  | 17 | 69085137  | G | A | 0.02 | 0.14  | 0.02 | 6.80E-09  |
| MDGA1 | rs7287617   | 22 | 39501158  | A | G | 0.65 | 0.04  | 0.00 | 3.79E-07  |
| MDK   | rs6427756   | 1  | 199031598 | G | A | 0.73 | -0.08 | 0.01 | 7.46E-10  |
| MDK   | rs7618405   | 3  | 18209017  | A | C | 0.20 | -0.07 | 0.01 | 2.23E-06  |
| MDK   | rs1354034   | 3  | 56815721  | C | T | 0.60 | -0.06 | 0.01 | 1.01E-06  |
| MDK   | rs6961069   | 7  | 80589645  | T | C | 0.40 | 0.05  | 0.01 | 1.29E-05  |
| MDK   | rs6993770   | 8  | 105569300 | T | A | 0.29 | -0.08 | 0.01 | 6.45E-10  |
| MDK   | rs7080386   | 10 | 63288546  | A | C | 0.41 | 0.07  | 0.01 | 7.53E-10  |
| MDK   | rs541295226 | 11 | 46380789  | G | A | 0.00 | -1.66 | 0.10 | 2.26E-26  |
| MDK   | rs117125830 | 11 | 56252294  | T | C | 0.01 | -0.51 | 0.05 | 6.59E-12  |

|        |             |    |           |   |   |      |       |      |           |
|--------|-------------|----|-----------|---|---|------|-------|------|-----------|
| MDK    | rs3184504   | 12 | 111446804 | C | T | 0.52 | -0.06 | 0.01 | 1.86E-08  |
| MDK    | rs12445050  | 16 | 81837364  | T | C | 0.14 | 0.08  | 0.01 | 4.42E-06  |
| MDK    | rs57839578  | 17 | 5365042   | T | A | 0.48 | -0.05 | 0.01 | 8.94E-06  |
| MDK    | rs892090    | 19 | 55027704  | G | T | 0.83 | 0.13  | 0.01 | 1.61E-16  |
| MDK    | rs14142     | 20 | 45345427  | T | C | 0.37 | -0.06 | 0.01 | 2.79E-07  |
| MED18  | rs12245149  | 10 | 63561387  | A | C | 0.49 | -0.06 | 0.01 | 1.11E-06  |
| MED18  | rs200309755 | 17 | 29518756  | T | C | 0.54 | 0.06  | 0.01 | 5.39E-06  |
| MEGF10 | -           | 3  | 12807512  | T | A | 0.66 | 0.07  | 0.01 | 4.48E-10  |
| MEGF10 | rs766512750 | 3  | 98922306  | T | C | 0.18 | 0.06  | 0.01 | 1.45E-05  |
| MEGF10 | rs112394041 | 5  | 127292892 | T | C | 0.46 | 0.40  | 0.01 | 1.54E-284 |
| MEGF10 | rs200889152 | 6  | 117186819 | C | A | 0.37 | -0.06 | 0.01 | 2.62E-09  |
| MEGF10 | rs4841132   | 8  | 9326086   | G | A | 0.91 | -0.08 | 0.01 | 1.62E-05  |
| MEGF10 | rs10813959  | 9  | 33166236  | C | T | 0.42 | 0.08  | 0.01 | 2.06E-13  |
| MEGF10 | rs508196    | 10 | 17974944  | T | C | 0.44 | -0.05 | 0.01 | 3.48E-07  |
| MEGF10 | rs7232      | 11 | 60173126  | A | T | 0.37 | 0.05  | 0.01 | 1.45E-06  |
| MEGF10 | rs2236653   | 11 | 126413890 | T | C | 0.43 | 0.05  | 0.01 | 1.88E-06  |
| MEGF10 | rs10849082  | 12 | 482922    | C | T | 0.47 | -0.06 | 0.01 | 2.47E-08  |
| MEGF10 | rs632887    | 12 | 3283185   | G | A | 0.41 | 0.08  | 0.01 | 1.62E-14  |
| MEGF10 | -           | 12 | 48210711  | A | T | 0.56 | -0.05 | 0.01 | 1.37E-06  |
| MEGF10 | rs199957765 | 14 | 35256291  | A | C | 0.40 | 0.05  | 0.01 | 1.61E-05  |
| MEGF10 | rs3007036   | 14 | 49639327  | G | A | 0.54 | 0.06  | 0.01 | 2.53E-08  |
| MEGF10 | rs186021206 | 17 | 7166093   | A | G | 0.01 | 0.67  | 0.05 | 6.29E-21  |
| MEGF10 | rs77542162  | 17 | 69085137  | G | A | 0.02 | 0.79  | 0.02 | 2.64E-118 |
| MEGF10 | rs6068599   | 20 | 53643079  | C | T | 0.68 | -0.05 | 0.01 | 1.04E-06  |
| MEGF10 | -           | 22 | 19094017  | T | A | 0.19 | -0.07 | 0.01 | 5.56E-07  |
| MEGF9  | rs646776    | 1  | 109275908 | T | C | 0.78 | -0.08 | 0.01 | 1.23E-09  |
| MEGF9  | rs12732792  | 1  | 178669563 | A | G | 0.48 | 0.05  | 0.01 | 1.32E-06  |
| MEGF9  | -           | 3  | 136181921 | A | T | 0.70 | 0.06  | 0.01 | 1.76E-06  |
| MEGF9  | rs13107325  | 4  | 102267552 | T | C | 0.08 | 0.18  | 0.01 | 4.08E-17  |
| MEGF9  | rs80318131  | 7  | 129143002 | C | T | 0.31 | 0.06  | 0.01 | 1.04E-06  |
| MEGF9  | rs1461729   | 8  | 9329732   | G | A | 0.90 | -0.09 | 0.01 | 1.01E-06  |
| MEGF9  | rs28601761  | 8  | 125487789 | G | C | 0.42 | -0.08 | 0.01 | 2.03E-12  |
| MEGF9  | rs7849566   | 9  | 120698491 | C | A | 0.70 | 0.34  | 0.01 | 7.87E-172 |
| MEGF9  | rs9633740   | 10 | 80505515  | G | A | 0.80 | 0.08  | 0.01 | 3.14E-08  |
| MEGF9  | rs751229834 | 11 | 61808335  | C | A | 0.31 | 0.08  | 0.01 | 6.67E-10  |
| MEGF9  | rs11045819  | 12 | 21176879  | A | C | 0.16 | 0.15  | 0.01 | 1.85E-23  |
| MEGF9  | rs186021206 | 17 | 7166093   | A | G | 0.01 | 0.46  | 0.05 | 3.14E-09  |
| MEGF9  | rs77542162  | 17 | 69085137  | G | A | 0.02 | 0.26  | 0.02 | 5.39E-12  |
| MEGF9  | rs73066226  | 19 | 58496846  | C | T | 0.16 | 0.08  | 0.01 | 1.61E-07  |
| MEP1B  | rs75460349  | 1  | 26853597  | C | A | 0.02 | -0.15 | 0.02 | 6.73E-10  |
| MEP1B  | rs1730862   | 1  | 107071381 | A | G | 0.66 | 0.04  | 0.01 | 5.86E-07  |
| MEP1B  | rs1260326   | 2  | 27508073  | C | T | 0.61 | 0.06  | 0.00 | 1.24E-13  |
| MEP1B  | rs370213063 | 3  | 136744673 | C | T | 0.31 | -0.04 | 0.01 | 1.90E-06  |
| MEP1B  | -           | 4  | 105293951 | T | C | 0.41 | 0.03  | 0.00 | 1.04E-05  |
| MEP1B  | rs4895864   | 6  | 130043337 | T | C | 0.57 | 0.04  | 0.00 | 2.78E-07  |
| MEP1B  | rs6973520   | 7  | 129100389 | T | C | 0.51 | 0.04  | 0.00 | 3.04E-07  |
| MEP1B  | rs3735165   | 7  | 150371282 | C | T | 0.31 | 0.07  | 0.01 | 1.08E-19  |
| MEP1B  | rs112875651 | 8  | 125494452 | A | G | 0.39 | 0.04  | 0.00 | 5.71E-08  |
| MEP1B  | rs174533    | 11 | 61781553  | A | G | 0.35 | 0.05  | 0.01 | 1.96E-11  |
| MEP1B  | rs11045856  | 12 | 21197755  | G | T | 0.24 | 0.04  | 0.01 | 9.18E-07  |
| MEP1B  | rs7979473   | 12 | 120982457 | G | A | 0.62 | -0.05 | 0.00 | 1.94E-11  |
| MEP1B  | rs17616063  | 16 | 51402971  | G | A | 0.07 | -0.10 | 0.01 | 3.90E-13  |
| MEP1B  | rs16940186  | 16 | 85976134  | C | T | 0.15 | 0.13  | 0.01 | 8.90E-38  |
| MEP1B  | rs4564600   | 17 | 76609022  | A | G | 0.56 | -0.04 | 0.00 | 7.37E-09  |
| MEP1B  | rs680321    | 18 | 32217995  | C | T | 0.46 | -1.07 | 0.01 | 0.00E+00  |
| MEP1B  | rs1800961   | 20 | 44413724  | T | C | 0.03 | 0.10  | 0.01 | 1.74E-06  |

|       |             |    |           |   |   |      |       |      |           |
|-------|-------------|----|-----------|---|---|------|-------|------|-----------|
| MEPE  | rs181163165 | 1  | 92486835  | T | C | 0.00 | -0.43 | 0.06 | 9.24E-07  |
| MEPE  | rs1393691   | 1  | 219601777 | T | G | 0.52 | -0.08 | 0.01 | 2.39E-13  |
| MEPE  | rs6547692   | 2  | 27512105  | A | G | 0.56 | 0.05  | 0.01 | 2.30E-05  |
| MEPE  | rs77623237  | 2  | 229249783 | C | T | 0.18 | -0.14 | 0.01 | 2.33E-24  |
| MEPE  | rs17013212  | 4  | 87832908  | T | C | 0.14 | -0.19 | 0.01 | 8.14E-33  |
| MEPE  | rs12509937  | 4  | 186239096 | T | C | 0.51 | -0.06 | 0.01 | 1.40E-08  |
| MEPE  | rs55712380  | 6  | 139288987 | T | G | 0.28 | -0.05 | 0.01 | 1.96E-05  |
| MEPE  | rs757980    | 7  | 28685919  | A | G | 0.75 | 0.07  | 0.01 | 1.17E-07  |
| MEPE  | rs7842942   | 8  | 118996348 | C | T | 0.57 | 0.06  | 0.01 | 4.33E-09  |
| MEPE  | rs201265508 | 11 | 180231    | G | A | 0.29 | 0.07  | 0.01 | 1.52E-06  |
| MEPE  | rs3008070   | 13 | 22452312  | G | T | 0.22 | -0.07 | 0.01 | 5.67E-07  |
| MEPE  | rs806292    | 13 | 50236895  | G | A | 0.53 | -0.06 | 0.01 | 1.21E-07  |
| MEPE  | rs28929474  | 14 | 94378610  | T | C | 0.02 | 0.16  | 0.02 | 2.79E-05  |
| MEPE  | rs2614763   | 15 | 50850536  | A | C | 0.45 | 0.10  | 0.01 | 3.67E-21  |
| MEPE  | rs111791352 | 15 | 67280330  | A | T | 0.23 | 0.06  | 0.01 | 1.19E-06  |
| MEPE  | rs10521142  | 16 | 27118834  | G | A | 0.56 | 0.08  | 0.01 | 1.59E-12  |
| MEPE  | rs78005814  | 17 | 46047809  | C | A | 0.35 | 0.05  | 0.01 | 1.81E-05  |
| MERTK | rs10779835  | 1  | 230164203 | C | T | 0.61 | -0.09 | 0.01 | 6.86E-16  |
| MERTK | rs10188642  | 2  | 111983522 | A | G | 0.63 | -0.26 | 0.01 | 2.29E-125 |
| MERTK | rs10935473  | 3  | 98698056  | T | G | 0.44 | -0.07 | 0.01 | 4.61E-12  |
| MERTK | rs35371668  | 6  | 32593861  | T | C | 0.18 | -0.11 | 0.01 | 1.45E-13  |
| MERTK | -           | 9  | 133263362 | G | A | 0.18 | -0.16 | 0.01 | 6.51E-30  |
| MERTK | rs11596680  | 10 | 19919554  | G | A | 0.33 | 0.07  | 0.01 | 6.53E-09  |
| MERTK | rs7088799   | 10 | 63256414  | G | T | 0.41 | 0.07  | 0.01 | 3.03E-11  |
| MERTK | -           | 11 | 61774534  | G | A | 0.35 | 0.07  | 0.01 | 6.67E-10  |
| MERTK | rs494144    | 11 | 89465628  | C | T | 0.54 | -0.08 | 0.01 | 8.23E-15  |
| MERTK | -           | 12 | 21191379  | G | A | 0.24 | 0.16  | 0.01 | 4.19E-35  |
| MERTK | rs9738226   | 12 | 120985856 | G | A | 0.62 | -0.06 | 0.01 | 1.45E-08  |
| MERTK | rs28929474  | 14 | 94378610  | T | C | 0.02 | 0.20  | 0.02 | 1.20E-07  |
| MERTK | rs423135    | 16 | 89674465  | A | G | 0.52 | 0.07  | 0.01 | 2.44E-10  |
| MERTK | rs186021206 | 17 | 7166093   | A | G | 0.01 | 0.61  | 0.05 | 7.69E-17  |
| MERTK | rs12451766  | 17 | 47543895  | G | A | 0.50 | 0.06  | 0.01 | 3.91E-07  |
| MERTK | rs58895965  | 19 | 35060524  | A | C | 0.18 | 0.07  | 0.01 | 1.65E-06  |
| MERTK | rs111981233 | 19 | 49513222  | G | T | 0.08 | 0.09  | 0.01 | 9.29E-06  |
| MESD  | rs1354034   | 3  | 56815721  | C | T | 0.60 | 0.07  | 0.01 | 3.23E-09  |
| MESD  | rs17622656  | 5  | 132485305 | A | G | 0.39 | -0.05 | 0.01 | 2.66E-05  |
| MESD  | rs342298    | 7  | 106733200 | T | C | 0.45 | -0.05 | 0.01 | 2.38E-05  |
| MESD  | rs6993770   | 8  | 105569300 | T | A | 0.29 | -0.09 | 0.01 | 1.90E-11  |
| MET   | rs79094524  | 1  | 39575699  | A | G | 0.23 | -0.06 | 0.01 | 1.26E-05  |
| MET   | rs4855845   | 3  | 49649610  | C | T | 0.82 | -0.06 | 0.01 | 9.38E-06  |
| MET   | rs5398      | 3  | 170998041 | A | G | 0.28 | -0.09 | 0.01 | 4.03E-14  |
| MET   | rs1858830   | 7  | 116672385 | G | C | 0.44 | -0.16 | 0.01 | 5.27E-44  |
| MET   | rs7799998   | 7  | 129098896 | G | A | 0.45 | -0.07 | 0.01 | 3.50E-11  |
| MET   | rs507666    | 9  | 133273983 | A | G | 0.18 | -0.33 | 0.01 | 1.22E-123 |
| MET   | rs10761779  | 10 | 63515167  | G | A | 0.47 | 0.07  | 0.01 | 4.25E-10  |
| MET   | rs10748526  | 10 | 80513323  | C | T | 0.79 | 0.12  | 0.01 | 6.69E-21  |
| MET   | rs174547    | 11 | 61803311  | C | T | 0.34 | 0.10  | 0.01 | 2.08E-19  |
| MET   | rs11045819  | 12 | 21176879  | A | C | 0.16 | 0.12  | 0.01 | 5.62E-16  |
| MET   | rs2464190   | 12 | 120977587 | C | T | 0.41 | 0.05  | 0.01 | 1.27E-06  |
| MET   | rs1041316   | 14 | 56633141  | A | G | 0.73 | 0.08  | 0.01 | 3.40E-11  |
| MET   | rs28929474  | 14 | 94378610  | T | C | 0.02 | 0.31  | 0.02 | 9.65E-17  |
| MET   | rs1982784   | 16 | 4616536   | G | A | 0.81 | 0.07  | 0.01 | 3.01E-06  |
| MET   | rs4850      | 16 | 21965441  | A | G | 0.06 | 0.15  | 0.02 | 7.34E-10  |
| MET   | rs186021206 | 17 | 7166093   | A | G | 0.01 | 0.56  | 0.05 | 6.32E-14  |
| MET   | rs34349423  | 17 | 49782701  | C | A | 0.63 | -0.05 | 0.01 | 2.71E-05  |
| MET   | rs77542162  | 17 | 69085137  | G | A | 0.02 | 0.38  | 0.02 | 2.19E-26  |

|           |             |    |           |   |   |      |       |      |           |
|-----------|-------------|----|-----------|---|---|------|-------|------|-----------|
| MET       | rs10401969  | 19 | 19296909  | C | T | 0.08 | -0.11 | 0.01 | 2.55E-07  |
| MET       | rs112167630 | 19 | 42370749  | A | G | 0.03 | 0.26  | 0.02 | 1.77E-15  |
| MET       | rs914187    | 21 | 41247822  | C | T | 0.60 | -0.05 | 0.01 | 1.11E-06  |
| METAP1D   | rs138869820 | 2  | 172066280 | A | G | 0.00 | -0.81 | 0.09 | 1.51E-08  |
| METAP1D   | rs6993770   | 8  | 105569300 | T | A | 0.29 | -0.06 | 0.01 | 1.57E-06  |
| METAP1D   | rs6580980   | 12 | 54298277  | G | A | 0.56 | 0.06  | 0.01 | 2.36E-07  |
| METAP2    | rs1354034   | 3  | 56815721  | C | T | 0.60 | 0.10  | 0.01 | 1.76E-17  |
| METAP2    | rs6993770   | 8  | 105569300 | T | A | 0.29 | -0.07 | 0.01 | 9.03E-08  |
| METAP2    | -           | 10 | 63156270  | A | T | 0.49 | 0.05  | 0.01 | 9.44E-06  |
| METAP2    | rs11502185  | 11 | 180258    | C | T | 0.26 | 0.07  | 0.01 | 5.33E-06  |
| METAP2    | rs11170874  | 12 | 54332691  | G | A | 0.33 | 0.06  | 0.01 | 4.34E-06  |
| METAP2    | rs10405535  | 19 | 32581179  | G | A | 0.68 | 0.10  | 0.01 | 8.84E-15  |
| MFAP5     | rs4894803   | 3  | 172082466 | G | A | 0.41 | 0.07  | 0.01 | 6.68E-11  |
| MFAP5     | rs1918352   | 7  | 100165816 | A | G | 0.55 | 0.05  | 0.01 | 3.15E-06  |
| MFAP5     | rs532436    | 9  | 133274414 | A | G | 0.18 | -0.08 | 0.01 | 3.28E-09  |
| MFAP5     | rs4132450   | 12 | 8662099   | T | C | 0.00 | -1.70 | 0.06 | 4.23E-82  |
| MFAP5     | rs1126464   | 16 | 89637957  | C | G | 0.24 | -0.06 | 0.01 | 1.56E-05  |
| MFAP5     | rs7412      | 19 | 44908822  | T | C | 0.08 | 0.09  | 0.01 | 7.04E-06  |
| MFGE8     | rs777231403 | 1  | 62634374  | A | G | 0.35 | -0.06 | 0.01 | 2.16E-07  |
| MFGE8     | rs1260326   | 2  | 27508073  | C | T | 0.61 | -0.06 | 0.01 | 6.34E-08  |
| MFGE8     | rs56210800  | 3  | 124753745 | G | C | 0.13 | -0.08 | 0.01 | 8.90E-07  |
| MFGE8     | rs11134475  | 5  | 156972939 | G | A | 0.64 | 0.06  | 0.01 | 4.66E-07  |
| MFGE8     | rs521977    | 6  | 31869050  | G | T | 0.68 | 0.07  | 0.01 | 1.34E-08  |
| MFGE8     | rs17145750  | 7  | 73612048  | T | C | 0.16 | -0.08 | 0.01 | 1.85E-07  |
| MFGE8     | rs200646600 | 8  | 19998347  | A | T | 0.23 | -0.07 | 0.01 | 1.52E-07  |
| MFGE8     | rs2980888   | 8  | 125495066 | C | T | 0.70 | -0.07 | 0.01 | 5.67E-08  |
| MFGE8     | rs7232      | 11 | 60173126  | A | T | 0.37 | 0.19  | 0.01 | 3.14E-60  |
| MFGE8     | rs964184    | 11 | 116778201 | C | G | 0.87 | -0.16 | 0.01 | 5.90E-23  |
| MFGE8     | rs2141247   | 12 | 124366207 | A | C | 0.61 | 0.08  | 0.01 | 1.33E-12  |
| MFGE8     | rs6602913   | 13 | 113841152 | C | A | 0.37 | 0.06  | 0.01 | 6.73E-08  |
| MFGE8     | rs139566989 | 15 | 58434769  | T | C | 0.78 | -0.08 | 0.01 | 3.01E-08  |
| MFGE8     | rs34239095  | 15 | 88912537  | G | C | 0.28 | 0.37  | 0.01 | 2.63E-203 |
| MFGE8     | rs34954997  | 19 | 44914381  | G | C | 0.24 | 0.06  | 0.01 | 6.17E-06  |
| MFGE8     | rs189448562 | 20 | 3724468   | C | G | 0.01 | 0.33  | 0.03 | 1.15E-09  |
| MGLL      | rs7578      | 3  | 127689396 | A | G | 0.56 | 0.06  | 0.01 | 3.47E-07  |
| MGLL      | rs6993770   | 8  | 105569300 | T | A | 0.29 | -0.09 | 0.01 | 1.64E-12  |
| MGLL      | rs77303550  | 16 | 72045758  | T | C | 0.20 | 0.07  | 0.01 | 7.80E-06  |
| MGMT      | rs1354034   | 3  | 56815721  | C | T | 0.60 | 0.06  | 0.01 | 7.42E-07  |
| MGMT      | rs342298    | 7  | 106733200 | T | C | 0.46 | -0.05 | 0.01 | 1.80E-06  |
| MGMT      | -           | 10 | 63156270  | A | T | 0.49 | 0.05  | 0.01 | 3.97E-06  |
| MGMT      | rs1008982   | 10 | 129647467 | C | T | 0.37 | -0.41 | 0.01 | 2.86E-269 |
| MIA       | rs4257489   | 3  | 98914437  | C | A | 0.34 | -0.05 | 0.01 | 1.28E-05  |
| MIA       | rs4917      | 3  | 186619924 | C | T | 0.64 | 0.06  | 0.01 | 4.88E-08  |
| MIA       | rs28817415  | 4  | 76480299  | T | C | 0.46 | 0.05  | 0.01 | 5.61E-08  |
| MIA       | rs60028714  | 4  | 85472147  | T | C | 0.62 | -0.05 | 0.01 | 1.07E-06  |
| MIA       | rs3132568   | 6  | 31134140  | G | A | 0.26 | -0.05 | 0.01 | 5.84E-06  |
| MIA       | rs77542162  | 17 | 69085137  | G | A | 0.02 | 0.27  | 0.02 | 4.18E-16  |
| MIA       | rs2233159   | 19 | 40777460  | G | C | 0.93 | -1.37 | 0.01 | 0.00E+00  |
| MICB_MICA | rs2009581   | 2  | 111050100 | A | G | 0.27 | -0.03 | 0.00 | 1.11E-05  |
| MICB_MICA | rs10935473  | 3  | 98698056  | T | G | 0.44 | -0.10 | 0.00 | 5.46E-66  |
| MICB_MICA | rs3132467   | 6  | 31413166  | A | G | 0.26 | -1.10 | 0.01 | 0.00E+00  |
| MICB_MICA | -           | 9  | 133263362 | G | A | 0.18 | -0.09 | 0.00 | 2.37E-32  |
| MICB_MICA | rs186862582 | 12 | 10352001  | G | A | 0.00 | -0.34 | 0.04 | 8.80E-07  |
| MICB_MICA | rs3184504   | 12 | 111446804 | C | T | 0.52 | -0.03 | 0.00 | 1.06E-05  |
| MICB_MICA | rs35715239  | 15 | 55332404  | C | G | 0.33 | -0.05 | 0.00 | 4.41E-18  |
| MICB_MICA | rs186021206 | 17 | 7166093   | A | G | 0.01 | 0.34  | 0.03 | 5.50E-18  |

|           |             |    |           |   |   |      |       |      |           |
|-----------|-------------|----|-----------|---|---|------|-------|------|-----------|
| MICB_MICA | rs4760      | 19 | 43648948  | G | A | 0.16 | 0.04  | 0.01 | 4.69E-07  |
| MIF       | rs1354034   | 3  | 56815721  | C | T | 0.60 | 0.07  | 0.01 | 9.23E-09  |
| MIF       | rs10733789  | 10 | 63188924  | C | T | 0.31 | 0.06  | 0.01 | 8.97E-06  |
| MIF       | rs11502185  | 11 | 180258    | C | T | 0.26 | 0.06  | 0.01 | 2.42E-05  |
| MIF       | rs60822569  | 12 | 54323724  | C | T | 0.55 | 0.05  | 0.01 | 7.61E-06  |
| MIF       | rs2330634   | 22 | 23908608  | G | C | 0.60 | -0.11 | 0.01 | 1.85E-20  |
| MILR1     | rs37471     | 1  | 43811876  | T | C | 0.35 | 0.05  | 0.01 | 1.52E-05  |
| MILR1     | rs1260326   | 2  | 27508073  | C | T | 0.61 | 0.05  | 0.01 | 9.62E-06  |
| MILR1     | rs140655352 | 3  | 98831392  | T | A | 0.09 | 0.20  | 0.01 | 2.09E-25  |
| MILR1     | rs2524119   | 6  | 31261627  | C | T | 0.54 | 0.06  | 0.01 | 3.55E-08  |
| MILR1     | rs6984305   | 8  | 9320758   | T | A | 0.89 | -0.07 | 0.01 | 2.50E-05  |
| MILR1     | rs4055121   | 11 | 126362442 | T | C | 0.13 | -0.10 | 0.01 | 8.98E-11  |
| MILR1     | rs1168948   | 12 | 120892562 | A | C | 0.49 | 0.05  | 0.01 | 1.08E-06  |
| MILR1     | rs186021206 | 17 | 7166093   | A | G | 0.01 | 1.25  | 0.05 | 1.09E-57  |
| MILR1     | rs704       | 17 | 28367840  | A | G | 0.47 | -0.06 | 0.01 | 2.26E-07  |
| MILR1     | rs138176943 | 17 | 64468504  | A | G | 0.06 | 0.79  | 0.02 | 7.29E-229 |
| MITD1     | rs13009147  | 2  | 99187535  | G | T | 0.65 | -0.07 | 0.01 | 1.42E-09  |
| MITD1     | rs1354034   | 3  | 56815721  | C | T | 0.60 | 0.06  | 0.01 | 1.14E-06  |
| MLN       | rs870465    | 1  | 3323635   | A | G | 0.17 | 0.06  | 0.01 | 1.51E-05  |
| MLN       | rs826404    | 1  | 117622100 | C | T | 0.59 | -0.06 | 0.01 | 3.14E-09  |
| MLN       | rs11240492  | 1  | 205492095 | C | G | 0.87 | 0.10  | 0.01 | 3.63E-11  |
| MLN       | rs16862260  | 2  | 221205237 | A | G | 0.21 | -0.22 | 0.01 | 7.45E-71  |
| MLN       | rs147351977 | 3  | 184221870 | A | G | 0.03 | 0.14  | 0.02 | 1.18E-05  |
| MLN       | rs76405485  | 5  | 7338998   | C | T | 0.35 | -0.07 | 0.01 | 1.72E-10  |
| MLN       | rs56092644  | 5  | 96439105  | T | G | 0.24 | 0.08  | 0.01 | 1.30E-11  |
| MLN       | rs67131976  | 6  | 20686647  | T | C | 0.17 | 0.17  | 0.01 | 2.95E-34  |
| MLN       | rs1547671   | 6  | 33809483  | T | C | 0.54 | -0.41 | 0.01 | 0.00E+00  |
| MLN       | rs13215052  | 6  | 41714097  | A | G | 0.09 | 0.09  | 0.01 | 5.22E-06  |
| MLN       | rs688949    | 6  | 116927769 | G | A | 0.18 | 0.10  | 0.01 | 1.23E-13  |
| MLN       | rs12114906  | 8  | 103976556 | C | T | 0.25 | -0.06 | 0.01 | 1.17E-07  |
| MLN       | rs10982164  | 9  | 114328787 | A | G | 0.07 | 0.18  | 0.01 | 1.16E-16  |
| MLN       | rs782134971 | 9  | 133264504 | G | C | 0.25 | -0.07 | 0.01 | 5.48E-10  |
| MLN       | rs4309096   | 10 | 46458013  | C | T | 0.65 | 0.07  | 0.01 | 1.34E-09  |
| MLN       | rs5785928   | 10 | 69560898  | T | C | 0.69 | -0.06 | 0.01 | 2.18E-07  |
| MLN       | rs11213809  | 11 | 111265020 | G | A | 0.66 | -0.05 | 0.01 | 3.63E-06  |
| MLN       | rs2485287   | 13 | 37945144  | C | A | 0.47 | 0.08  | 0.01 | 8.79E-14  |
| MLN       | rs11634163  | 15 | 62038434  | T | C | 0.40 | 0.06  | 0.01 | 5.49E-09  |
| MLN       | rs566487891 | 17 | 336025    | C | G | 0.79 | 0.06  | 0.01 | 4.48E-06  |
| MLN       | rs17681738  | 17 | 9889923   | T | C | 0.33 | 0.05  | 0.01 | 7.37E-07  |
| MLN       | rs74175746  | 19 | 23301088  | A | T | 0.18 | 0.07  | 0.01 | 6.54E-07  |
| MLN       | rs2251034   | 19 | 48704535  | A | G | 0.53 | -0.07 | 0.01 | 3.26E-13  |
| MLN       | rs2208150   | 20 | 16922822  | C | T | 0.59 | 0.08  | 0.01 | 3.06E-16  |
| MME       | rs1497406   | 1  | 16178825  | G | A | 0.58 | 0.08  | 0.01 | 2.24E-13  |
| MME       | rs4687657   | 3  | 52818522  | T | G | 0.26 | 0.58  | 0.01 | 0.00E+00  |
| MME       | rs79837905  | 3  | 155067802 | G | A | 0.08 | -0.11 | 0.01 | 3.77E-07  |
| MME       | rs4835265   | 4  | 145900258 | A | C | 0.16 | 0.12  | 0.01 | 4.60E-17  |
| MME       | rs10075805  | 5  | 31021251  | G | A | 0.28 | -0.05 | 0.01 | 2.50E-05  |
| MME       | rs112875651 | 8  | 125494452 | A | G | 0.39 | -0.05 | 0.01 | 7.68E-06  |
| MME       | rs151068477 | 10 | 50882756  | T | G | 0.01 | 0.27  | 0.04 | 1.70E-05  |
| MME       | rs1650146   | 10 | 77928450  | G | A | 0.62 | 0.05  | 0.01 | 6.59E-06  |
| MME       | rs17674290  | 12 | 20845175  | G | T | 0.15 | 0.06  | 0.01 | 1.41E-05  |
| MME       | rs59643720  | 14 | 103098470 | C | A | 0.24 | 0.11  | 0.01 | 6.52E-20  |
| MME       | rs12373325  | 18 | 58420416  | C | T | 0.80 | -0.10 | 0.01 | 6.48E-14  |
| MME       | rs58659609  | 19 | 3482461   | A | C | 0.18 | 0.07  | 0.01 | 1.48E-07  |
| MME       | rs189448562 | 20 | 3724468   | C | G | 0.01 | 0.28  | 0.03 | 2.86E-08  |
| MME       | rs12169946  | 22 | 17985339  | G | A | 0.26 | -0.06 | 0.01 | 1.38E-06  |

|          |             |    |           |   |   |      |       |      |           |
|----------|-------------|----|-----------|---|---|------|-------|------|-----------|
| MMP1     | rs12136856  | 1  | 156503322 | G | C | 0.65 | 0.09  | 0.01 | 6.90E-18  |
| MMP1     | rs12622659  | 2  | 68419147  | A | G | 0.30 | -0.06 | 0.01 | 5.40E-07  |
| MMP1     | rs76036957  | 2  | 112738876 | A | G | 0.01 | 0.31  | 0.04 | 2.66E-08  |
| MMP1     | rs28706788  | 5  | 160148021 | A | G | 0.54 | -0.05 | 0.01 | 2.89E-07  |
| MMP1     | rs5879021   | 6  | 109314355 | C | G | 0.52 | 0.07  | 0.01 | 9.39E-11  |
| MMP1     | rs6961069   | 7  | 80589645  | T | C | 0.40 | 0.05  | 0.01 | 2.50E-05  |
| MMP1     | rs6993770   | 8  | 105569300 | T | A | 0.29 | -0.16 | 0.01 | 3.65E-43  |
| MMP1     | rs10820606  | 9  | 96430637  | C | A | 0.23 | 0.08  | 0.01 | 2.77E-11  |
| MMP1     | rs150813342 | 9  | 132989126 | T | C | 0.01 | -0.25 | 0.04 | 1.97E-05  |
| MMP1     | -           | 10 | 99528354  | C | A | 0.28 | 0.07  | 0.01 | 3.59E-08  |
| MMP1     | rs471994    | 11 | 102827000 | A | G | 0.36 | -0.46 | 0.01 | 0.00E+00  |
| MMP1     | rs60822569  | 12 | 54323724  | C | T | 0.55 | 0.05  | 0.01 | 7.42E-07  |
| MMP1     | rs757848155 | 12 | 56757619  | C | A | 0.64 | 0.05  | 0.01 | 3.49E-06  |
| MMP1     | rs12445050  | 16 | 81837364  | T | C | 0.14 | 0.07  | 0.01 | 2.30E-06  |
| MMP1     | rs1654425   | 19 | 55027612  | C | T | 0.83 | 0.12  | 0.01 | 2.56E-17  |
| MMP1     | -           | 20 | 19334040  | T | A | 0.38 | 0.06  | 0.01 | 6.02E-08  |
| MMP10    | rs187265184 | 6  | 32557992  | G | C | 0.36 | 0.06  | 0.01 | 4.67E-06  |
| MMP10    | rs486055    | 11 | 102779693 | T | C | 0.16 | -0.40 | 0.01 | 4.71E-146 |
| MMP10    | rs681343    | 19 | 48703205  | T | C | 0.51 | 0.13  | 0.01 | 5.95E-35  |
| MMP12    | rs2770      | 6  | 31354030  | A | G | 0.45 | -0.05 | 0.01 | 1.28E-06  |
| MMP12    | rs17368814  | 11 | 102877965 | G | A | 0.13 | -0.74 | 0.01 | 0.00E+00  |
| MMP12    | rs61729512  | 12 | 7485173   | A | G | 0.12 | 0.11  | 0.01 | 4.76E-12  |
| MMP12    | rs12986064  | 19 | 54251270  | C | T | 0.51 | -0.08 | 0.01 | 1.53E-15  |
| MMP13    | rs562736    | 11 | 102956184 | T | A | 0.56 | -0.14 | 0.01 | 4.35E-33  |
| MMP3     | rs41341748  | 8  | 16155085  | A | G | 0.01 | 0.25  | 0.03 | 5.97E-11  |
| MMP3     | rs678815    | 11 | 102843046 | C | G | 0.48 | 0.48  | 0.01 | 0.00E+00  |
| MMP3     | rs9895446   | 17 | 69473737  | C | T | 0.06 | -0.07 | 0.01 | 2.59E-05  |
| MMP3     | rs2267372   | 22 | 38202227  | G | A | 0.60 | 0.05  | 0.01 | 4.57E-10  |
| MMP7     | rs6694034   | 1  | 202034859 | C | A | 0.45 | 0.11  | 0.01 | 2.00E-22  |
| MMP7     | rs11568819  | 11 | 102530902 | A | G | 0.06 | 0.57  | 0.01 | 7.00E-139 |
| MMP7     | rs61729512  | 12 | 7485173   | A | G | 0.12 | 0.08  | 0.01 | 5.68E-06  |
| MMP7     | rs77924615  | 16 | 20381010  | A | G | 0.20 | -0.09 | 0.01 | 4.82E-11  |
| MMP7     | rs12975366  | 19 | 54255498  | C | T | 0.39 | -0.06 | 0.01 | 3.13E-08  |
| MMP8     | -           | 11 | 47280489  | T | A | 0.11 | -0.13 | 0.01 | 4.10E-13  |
| MMP8     | rs2511241   | 11 | 73234296  | T | C | 0.93 | 0.19  | 0.01 | 2.18E-18  |
| MMP8     | rs35231465  | 11 | 102713404 | A | G | 0.02 | -1.25 | 0.02 | 1.02E-266 |
| MMP8     | -           | 17 | 39988115  | T | A | 0.54 | -0.09 | 0.01 | 3.16E-16  |
| MMP9     | rs1886654   | 1  | 235942610 | C | T | 0.89 | -0.08 | 0.01 | 5.06E-06  |
| MMP9     | rs28498283  | 2  | 43132926  | T | A | 0.25 | 0.06  | 0.01 | 9.37E-06  |
| MMP9     | rs4619875   | 4  | 152779978 | T | C | 0.40 | -0.06 | 0.01 | 4.28E-07  |
| MMP9     | rs9325122   | 5  | 148823373 | T | C | 0.55 | -0.05 | 0.01 | 2.00E-05  |
| MMP9     | -           | 6  | 31448099  | T | G | 0.30 | 0.07  | 0.01 | 3.32E-09  |
| MMP9     | rs2158799   | 7  | 28237488  | G | C | 0.61 | 0.05  | 0.01 | 5.05E-06  |
| MMP9     | rs2511241   | 11 | 73234296  | T | C | 0.93 | 0.38  | 0.01 | 5.94E-70  |
| MMP9     | rs2289511   | 14 | 87988566  | A | G | 0.58 | -0.06 | 0.01 | 4.55E-07  |
| MMP9     | rs3826331   | 17 | 39994239  | C | T | 0.60 | -0.08 | 0.01 | 1.25E-13  |
| MMP9     | rs17576     | 20 | 46011586  | G | A | 0.35 | 0.14  | 0.01 | 5.04E-34  |
| MNDA     | rs6503533   | 17 | 40028327  | T | C | 0.62 | -0.05 | 0.01 | 1.30E-05  |
| MOG      | rs9461541   | 6  | 29657418  | G | A | 0.05 | -0.45 | 0.02 | 1.87E-72  |
| MOG      | rs8021280   | 14 | 74823315  | G | C | 0.46 | 0.06  | 0.01 | 3.95E-07  |
| MPHOSPH8 | rs1354034   | 3  | 56815721  | C | T | 0.60 | 0.07  | 0.01 | 4.16E-09  |
| MPHOSPH8 | -           | 10 | 63156270  | A | T | 0.49 | 0.06  | 0.01 | 6.17E-07  |
| MPHOSPH8 | rs35424555  | 13 | 19647376  | G | A | 0.12 | 0.09  | 0.01 | 7.07E-07  |
| MPI      | rs1354034   | 3  | 56815721  | C | T | 0.60 | 0.07  | 0.01 | 2.66E-09  |
| MPI      | rs17622656  | 5  | 132485305 | A | G | 0.39 | -0.05 | 0.01 | 1.14E-05  |
| MPI      | rs7080386   | 10 | 63288546  | A | C | 0.41 | 0.06  | 0.01 | 1.64E-07  |



|        |             |    |           |   |   |      |       |      |           |
|--------|-------------|----|-----------|---|---|------|-------|------|-----------|
| MPI    | rs11502185  | 11 | 180258    | C | T | 0.26 | 0.06  | 0.01 | 2.11E-05  |
| MPI    | rs4886632   | 15 | 74881584  | T | G | 0.58 | 0.20  | 0.01 | 1.37E-71  |
| MPIG6B | rs6961069   | 7  | 80589645  | T | C | 0.40 | 0.06  | 0.01 | 2.22E-06  |
| MPIG6B | rs6993770   | 8  | 105569300 | T | A | 0.29 | -0.10 | 0.01 | 6.73E-15  |
| MPIG6B | rs7896518   | 10 | 63344740  | G | A | 0.42 | 0.08  | 0.01 | 2.24E-10  |
| MPIG6B | rs1362213   | 12 | 6173262   | T | C | 0.48 | -0.06 | 0.01 | 2.99E-06  |
| MPIG6B | rs892090    | 19 | 55027704  | G | T | 0.83 | 0.10  | 0.01 | 9.58E-11  |
| MPO    | rs2120782   | 1  | 229534642 | C | G | 0.21 | 0.09  | 0.01 | 7.74E-10  |
| MPO    | rs7748270   | 6  | 32480822  | T | C | 0.52 | 0.05  | 0.01 | 1.69E-05  |
| MPO    | rs13277237  | 8  | 129592317 | A | G | 0.57 | -0.07 | 0.01 | 9.60E-11  |
| MPO    | rs757081    | 11 | 17330136  | G | C | 0.33 | 0.05  | 0.01 | 1.21E-05  |
| MPO    | rs12941811  | 17 | 40003082  | C | T | 0.57 | -0.06 | 0.01 | 1.49E-06  |
| MPO    | rs34097845  | 17 | 58281068  | T | C | 0.06 | -0.50 | 0.02 | 1.39E-90  |
| MPO    | rs3790320   | 20 | 17638809  | A | G | 0.39 | 0.07  | 0.01 | 6.56E-09  |
| MSLN   | rs72851462  | 2  | 25500169  | C | G | 0.12 | -0.10 | 0.01 | 1.77E-10  |
| MSLN   | -           | 6  | 31099297  | T | A | 0.32 | -0.07 | 0.01 | 9.01E-10  |
| MSLN   | rs1214761   | 6  | 43386693  | G | A | 0.68 | -0.09 | 0.01 | 6.86E-17  |
| MSLN   | rs11788059  | 9  | 106717987 | C | T | 0.34 | 0.07  | 0.01 | 7.89E-10  |
| MSLN   | rs35705950  | 11 | 1219991   | T | G | 0.11 | 0.07  | 0.01 | 2.52E-05  |
| MSLN   | rs2235503   | 16 | 760593    | A | C | 0.19 | 0.75  | 0.01 | 0.00E+00  |
| MSLN   | rs4807630   | 19 | 1170446   | T | C | 0.31 | 0.06  | 0.01 | 1.18E-06  |
| MSLN   | rs34450188  | 19 | 9420770   | G | A | 0.56 | 0.08  | 0.01 | 1.63E-13  |
| MSLN   | rs492602    | 19 | 48703160  | G | A | 0.51 | 0.07  | 0.01 | 1.24E-10  |
| MSMB   | rs4687657   | 3  | 52818522  | T | G | 0.26 | 0.09  | 0.01 | 5.34E-24  |
| MSMB   | rs62406520  | 6  | 36952853  | G | A | 0.10 | -0.11 | 0.01 | 6.20E-15  |
| MSMB   | rs73671500  | 8  | 23608303  | A | T | 0.17 | 0.08  | 0.01 | 2.77E-15  |
| MSMB   | rs10993994  | 10 | 46046326  | C | T | 0.61 | 0.93  | 0.01 | 0.00E+00  |
| MSMB   | rs36120341  | 19 | 45721713  | T | C | 0.36 | -0.05 | 0.01 | 1.27E-09  |
| MSR1   | rs41271951  | 1  | 150764744 | G | A | 0.09 | -0.10 | 0.01 | 9.10E-08  |
| MSR1   | rs755799544 | 1  | 196721823 | C | C | 0.36 | -0.05 | 0.01 | 2.73E-05  |
| MSR1   | rs547373038 | 3  | 99058488  | T | G | 0.49 | -0.08 | 0.01 | 1.63E-12  |
| MSR1   | rs2293330   | 3  | 143385000 | G | T | 0.83 | 0.07  | 0.01 | 8.95E-07  |
| MSR1   | rs1471401   | 4  | 87853188  | G | A | 0.66 | 0.05  | 0.01 | 9.47E-06  |
| MSR1   | rs115216147 | 5  | 71369699  | A | T | 0.07 | 0.09  | 0.01 | 1.86E-05  |
| MSR1   | rs509227    | 6  | 10535358  | C | A | 0.52 | 0.05  | 0.01 | 2.21E-07  |
| MSR1   | rs139299944 | 6  | 32634888  | T | C | 0.34 | -0.09 | 0.01 | 1.13E-18  |
| MSR1   | rs10863     | 7  | 130505748 | G | A | 0.85 | 0.07  | 0.01 | 9.52E-07  |
| MSR1   | rs41341748  | 8  | 16155085  | A | G | 0.01 | -1.54 | 0.03 | 1.98E-206 |
| MSR1   | rs2031902   | 9  | 33117526  | T | C | 0.59 | -0.06 | 0.01 | 1.47E-07  |
| MSR1   | -           | 9  | 133274293 | A | C | 0.18 | 0.07  | 0.01 | 4.98E-08  |
| MSR1   | rs11220505  | 11 | 126464910 | T | C | 0.22 | 0.14  | 0.01 | 2.81E-31  |
| MSR1   | rs77303550  | 16 | 72045758  | T | C | 0.20 | -0.06 | 0.01 | 2.19E-05  |
| MSR1   | rs186021206 | 17 | 7166093   | A | G | 0.01 | 1.38  | 0.05 | 2.84E-89  |
| MSRA   | rs1354034   | 3  | 56815721  | C | T | 0.60 | 0.06  | 0.01 | 2.70E-07  |
| MSRA   | rs12546887  | 8  | 10435366  | T | C | 0.59 | -0.06 | 0.01 | 1.31E-06  |
| MSRA   | -           | 10 | 63156270  | A | T | 0.49 | 0.06  | 0.01 | 2.28E-06  |
| MSRA   | rs139130389 | 11 | 72139110  | A | C | 0.07 | -0.15 | 0.01 | 1.71E-12  |
| MSTN   | rs10489588  | 1  | 3035270   | A | G | 0.21 | 0.06  | 0.01 | 1.06E-05  |
| MSTN   | rs143242500 | 2  | 190060135 | G | A | 0.00 | 0.78  | 0.09 | 4.69E-09  |
| MSTN   | rs9838614   | 3  | 38496180  | G | T | 0.39 | -0.05 | 0.01 | 1.74E-05  |
| MSTN   | rs199910997 | 6  | 32517878  | G | A | 0.56 | 0.05  | 0.01 | 1.21E-05  |
| MSTN   | rs34950020  | 6  | 133479407 | A | G | 0.32 | -0.08 | 0.01 | 3.45E-11  |
| MSTN   | rs1815739   | 11 | 66560624  | C | T | 0.56 | 0.06  | 0.01 | 3.28E-08  |
| MSTN   | rs8096658   | 18 | 79396537  | G | C | 0.49 | 0.06  | 0.01 | 1.86E-07  |
| MUC13  | rs1127233   | 3  | 124908177 | G | T | 0.26 | 0.24  | 0.01 | 1.26E-78  |
| MUC13  | rs4556017   | 7  | 100989509 | T | C | 0.85 | -0.10 | 0.01 | 1.15E-10  |

|       |             |    |           |   |   |      |       |      |           |
|-------|-------------|----|-----------|---|---|------|-------|------|-----------|
| MUC13 | rs2519093   | 9  | 133266456 | T | C | 0.18 | -0.25 | 0.01 | 7.34E-66  |
| MUC13 | rs12019136  | 19 | 5835666   | A | G | 0.04 | 0.13  | 0.02 | 4.93E-06  |
| MUC16 | rs62193070  | 2  | 241791173 | G | A | 0.16 | -0.26 | 0.01 | 3.92E-60  |
| MUC16 | rs7205754   | 16 | 765413    | A | C | 0.04 | -0.20 | 0.02 | 1.18E-11  |
| MUC16 | rs10421318  | 19 | 9010243   | A | G | 0.35 | -0.07 | 0.01 | 9.27E-09  |
| MVK   | rs28934897  | 12 | 109596515 | A | G | 0.00 | -1.02 | 0.09 | 4.34E-13  |
| MYO9B | rs11392202  | 19 | 17202369  | T | A | 0.40 | -0.05 | 0.01 | 1.86E-05  |
| MYOC  | rs1711003   | 1  | 171647381 | A | G | 0.58 | 0.27  | 0.01 | 7.58E-130 |
| MYOC  | -           | 2  | 218856229 | T | G | 0.06 | 0.13  | 0.02 | 2.38E-06  |
| MYOC  | rs309743    | 4  | 176495651 | C | A | 0.26 | 0.05  | 0.01 | 2.21E-05  |
| MYOC  | rs3812049   | 5  | 128083158 | G | C | 0.74 | 0.08  | 0.01 | 1.40E-11  |
| MYOC  | rs1474348   | 7  | 22728289  | G | C | 0.57 | 0.05  | 0.01 | 8.11E-06  |
| MYOC  | rs56278466  | 10 | 17833858  | G | T | 0.66 | 0.10  | 0.01 | 3.78E-20  |
| MYOC  | rs58473820  | 11 | 122643695 | T | C | 0.38 | 0.05  | 0.01 | 1.47E-05  |
| MYOC  | rs215225    | 12 | 481379    | G | A | 0.43 | 0.05  | 0.01 | 1.71E-05  |
| MYOC  | rs7310615   | 12 | 111427245 | G | C | 0.52 | 0.06  | 0.01 | 1.26E-07  |
| MYOC  | rs11632195  | 15 | 65201150  | T | C | 0.64 | -0.09 | 0.01 | 6.12E-15  |
| MYOC  | rs186021206 | 17 | 7166093   | A | G | 0.01 | 0.52  | 0.05 | 7.20E-13  |
| MYOC  | rs61739916  | 19 | 18786630  | C | T | 0.06 | 0.15  | 0.02 | 3.91E-10  |
| MZB1  | rs149547076 | 3  | 57571717  | C | T | 0.01 | -0.56 | 0.04 | 7.60E-24  |
| MZB1  | rs11739135  | 5  | 132397705 | C | G | 0.42 | 0.05  | 0.01 | 1.43E-05  |
| MZB1  | rs140248321 | 5  | 139390083 | T | A | 0.06 | 0.25  | 0.02 | 3.41E-22  |
| MZB1  | rs778224678 | 7  | 151256873 | G | T | 0.11 | 0.10  | 0.01 | 7.27E-09  |
| MZB1  | rs61839660  | 10 | 6052734   | T | C | 0.10 | 0.10  | 0.01 | 3.79E-07  |
| MZB1  | -           | 11 | 17247874  | C | A | 0.44 | -0.06 | 0.01 | 7.89E-08  |
| MZB1  | rs3803286   | 14 | 102780133 | G | A | 0.67 | -0.06 | 0.01 | 2.10E-07  |
| MZB1  | rs10150206  | 14 | 105740363 | A | G | 0.66 | 0.15  | 0.01 | 1.45E-37  |
| MZB1  | rs3803800   | 17 | 7559652   | G | A | 0.79 | -0.09 | 0.01 | 1.54E-10  |
| MZB1  | rs34562254  | 17 | 16939677  | A | G | 0.10 | 0.15  | 0.01 | 3.62E-16  |
| MZB1  | rs9624334   | 22 | 23824069  | C | G | 0.15 | -0.09 | 0.01 | 5.78E-08  |
| MZT1  | rs1354034   | 3  | 56815721  | C | T | 0.60 | 0.06  | 0.01 | 1.21E-06  |
| MZT1  | rs11101690  | 10 | 133308228 | C | T | 0.13 | -0.08 | 0.01 | 1.94E-05  |
| NAAA  | rs5014539   | 1  | 172516613 | T | G | 0.57 | 0.05  | 0.01 | 6.97E-07  |
| NAAA  | rs687339    | 3  | 136213517 | T | C | 0.77 | 0.06  | 0.01 | 1.26E-06  |
| NAAA  | rs112197434 | 4  | 75932965  | T | A | 0.23 | -0.67 | 0.01 | 0.00E+00  |
| NAAA  | rs114816312 | 4  | 109717668 | T | C | 0.01 | 0.29  | 0.04 | 1.01E-05  |
| NAAA  | -           | 4  | 118809663 | T | C | 0.06 | -0.12 | 0.02 | 9.51E-07  |
| NAAA  | rs77945361  | 4  | 153333382 | A | G | 0.15 | -0.08 | 0.01 | 4.83E-07  |
| NAAA  | rs4471106   | 9  | 5629133   | A | G | 0.29 | -0.05 | 0.01 | 1.65E-05  |
| NAAA  | rs1800866   | 9  | 34637693  | G | T | 0.17 | 0.07  | 0.01 | 2.39E-08  |
| NAAA  | rs772851187 | 10 | 63147821  | T | G | 0.47 | 0.06  | 0.01 | 1.17E-09  |
| NAAA  | rs7904738   | 10 | 72950726  | C | G | 0.09 | -0.09 | 0.01 | 2.12E-07  |
| NAAA  | rs2862954   | 10 | 100152307 | C | T | 0.50 | -0.05 | 0.01 | 1.39E-06  |
| NAAA  | rs7096937   | 10 | 112190660 | C | T | 0.73 | -0.06 | 0.01 | 1.51E-08  |
| NAAA  | rs10860794  | 12 | 101823942 | A | C | 0.29 | -0.36 | 0.01 | 2.30E-233 |
| NAAA  | rs150641790 | 13 | 41113708  | G | T | 0.07 | 0.10  | 0.01 | 6.97E-08  |
| NAAA  | rs71435622  | 14 | 39242324  | T | A | 0.29 | 0.07  | 0.01 | 2.89E-09  |
| NAAA  | rs145078947 | 14 | 93186629  | T | G | 0.00 | 0.79  | 0.06 | 9.64E-17  |
| NAAA  | rs62073233  | 17 | 46311546  | C | G | 0.21 | 0.06  | 0.01 | 2.61E-05  |
| NAAA  | rs200210321 | 19 | 19283081  | G | A | 0.07 | 0.12  | 0.01 | 6.82E-11  |
| NAAA  | rs429358    | 19 | 44908684  | C | T | 0.16 | -0.12 | 0.01 | 6.79E-18  |
| NAAA  | rs626283    | 19 | 54173307  | C | G | 0.44 | 0.06  | 0.01 | 1.11E-09  |
| NAAA  | rs738408    | 22 | 43928850  | T | C | 0.22 | 0.06  | 0.01 | 3.18E-06  |
| NADK  | rs17162854  | 1  | 1762287   | G | A | 0.52 | 0.25  | 0.01 | 1.99E-112 |
| NADK  | rs71309976  | 3  | 56694053  | T | C | 0.01 | 0.29  | 0.04 | 4.56E-07  |
| NADK  | rs389883    | 6  | 31979683  | T | G | 0.68 | 0.06  | 0.01 | 1.78E-06  |

|       |             |    |           |   |   |      |       |      |           |
|-------|-------------|----|-----------|---|---|------|-------|------|-----------|
| NADK  | rs56077246  | 8  | 143909325 | C | T | 0.43 | 0.08  | 0.01 | 7.06E-13  |
| NADK  | rs59581534  | 12 | 7438940   | A | T | 0.04 | 0.37  | 0.02 | 1.16E-42  |
| NBL1  | rs12408663  | 1  | 19641564  | C | T | 0.23 | -0.12 | 0.01 | 2.59E-20  |
| NBL1  | rs1260326   | 2  | 27508073  | C | T | 0.61 | 0.06  | 0.01 | 1.90E-06  |
| NBL1  | rs36060036  | 16 | 20350628  | T | C | 0.17 | -0.08 | 0.01 | 1.05E-07  |
| NBN   | rs1354034   | 3  | 56815721  | C | T | 0.60 | 0.06  | 0.01 | 1.29E-07  |
| NBN   | rs143331722 | 5  | 132595276 | A | G | 0.01 | -0.31 | 0.04 | 2.32E-08  |
| NBN   | rs74378230  | 8  | 90031136  | G | A | 0.00 | -0.61 | 0.06 | 4.89E-12  |
| NCAM1 | rs333947    | 1  | 109928142 | A | G | 0.15 | -0.06 | 0.01 | 1.44E-05  |
| NCAM1 | rs2301455   | 1  | 172449128 | T | C | 0.56 | 0.06  | 0.01 | 8.26E-08  |
| NCAM1 | rs66824127  | 3  | 52517249  | C | T | 0.56 | 0.06  | 0.01 | 4.24E-08  |
| NCAM1 | rs28383282  | 6  | 32618598  | T | C | 0.21 | 0.06  | 0.01 | 7.57E-06  |
| NCAM1 | rs11214489  | 11 | 113105212 | T | C | 0.18 | -0.33 | 0.01 | 4.83E-123 |
| NCAM1 | rs705702    | 12 | 55996852  | G | A | 0.34 | 0.06  | 0.01 | 6.17E-07  |
| NCAM1 | rs9318188   | 13 | 73536279  | G | A | 0.54 | -0.11 | 0.01 | 1.59E-26  |
| NCAM1 | rs2035645   | 15 | 92403096  | G | T | 0.56 | 0.11  | 0.01 | 7.98E-24  |
| NCAM1 | rs776023876 | 17 | 39675044  | C | A | 0.69 | 0.09  | 0.01 | 1.59E-14  |
| NCAM2 | rs199922514 | 8  | 9325592   | G | A | 0.91 | -0.08 | 0.01 | 1.94E-05  |
| NCAM2 | rs2071916   | 16 | 376476    | C | T | 0.59 | -0.19 | 0.01 | 2.31E-80  |
| NCAM2 | rs186021206 | 17 | 7166093   | A | G | 0.01 | 0.42  | 0.04 | 1.01E-09  |
| NCAM2 | rs77542162  | 17 | 69085137  | G | A | 0.02 | 0.19  | 0.02 | 4.75E-08  |
| NCAM2 | rs4760      | 19 | 43648948  | G | A | 0.16 | 0.12  | 0.01 | 3.56E-17  |
| NCAM2 | -           | 21 | 21467382  | T | A | 0.35 | 0.54  | 0.01 | 0.00E+00  |
| NCAM2 | rs760715    | 22 | 39466338  | C | T | 0.25 | 0.07  | 0.01 | 9.43E-08  |
| NCAN  | rs61804160  | 1  | 161650299 | A | T | 0.14 | 0.06  | 0.01 | 2.45E-05  |
| NCAN  | rs6786821   | 3  | 141280434 | G | C | 0.62 | 0.10  | 0.01 | 1.18E-18  |
| NCAN  | rs114964313 | 5  | 79137749  | A | G | 0.32 | 0.05  | 0.01 | 2.50E-05  |
| NCAN  | rs6913309   | 6  | 32372063  | A | T | 0.28 | 0.05  | 0.01 | 1.95E-05  |
| NCAN  | rs12523793  | 6  | 149652628 | A | G | 0.33 | 0.08  | 0.01 | 1.30E-13  |
| NCAN  | -           | 8  | 115606807 | C | A | 0.56 | 0.07  | 0.01 | 4.88E-10  |
| NCAN  | -           | 10 | 63156270  | A | T | 0.49 | 0.05  | 0.01 | 3.61E-06  |
| NCAN  | -           | 10 | 72028381  | C | A | 0.56 | 0.08  | 0.01 | 1.03E-12  |
| NCAN  | rs12801188  | 11 | 47366663  | A | G | 0.36 | 0.06  | 0.01 | 1.88E-07  |
| NCAN  | rs3751198   | 12 | 103753429 | G | A | 0.60 | 0.05  | 0.01 | 1.29E-06  |
| NCAN  | rs60111444  | 15 | 101089333 | G | A | 0.23 | 0.07  | 0.01 | 2.03E-08  |
| NCAN  | rs879292    | 16 | 17371057  | T | C | 0.34 | -0.07 | 0.01 | 2.96E-10  |
| NCAN  | rs117345300 | 17 | 44852391  | G | C | 0.04 | 0.12  | 0.02 | 2.20E-05  |
| NCAN  | rs6504649   | 17 | 50360095  | G | C | 0.39 | -0.07 | 0.01 | 9.76E-10  |
| NCAN  | rs74178612  | 18 | 51101919  | T | C | 0.37 | -0.06 | 0.01 | 2.59E-08  |
| NCAN  | rs3761077   | 19 | 19215154  | T | G | 0.11 | -0.24 | 0.01 | 4.26E-45  |
| NCF2  | rs35012521  | 1  | 183563229 | A | T | 0.01 | -0.93 | 0.04 | 4.32E-67  |
| NCF2  | -           | 7  | 75189161  | T | G | 0.10 | 0.09  | 0.01 | 1.19E-05  |
| NCF2  | rs149698681 | 15 | 42359702  | C | G | 0.02 | 0.21  | 0.02 | 7.93E-08  |
| NCF2  | rs12941811  | 17 | 40003082  | C | T | 0.57 | -0.05 | 0.01 | 8.18E-07  |
| NCF2  | rs4632248   | 19 | 53821741  | T | G | 0.21 | 0.16  | 0.01 | 4.58E-32  |
| NCK2  | rs11170874  | 12 | 54332691  | G | A | 0.33 | 0.05  | 0.01 | 2.84E-05  |
| NCLN  | rs9268228   | 6  | 32319342  | A | G | 0.63 | 0.06  | 0.01 | 3.24E-06  |
| NCR1  | rs181807963 | 1  | 155004195 | T | G | 0.01 | -0.31 | 0.04 | 3.71E-06  |
| NCR1  | rs6693836   | 1  | 185442174 | A | G | 0.64 | 0.07  | 0.01 | 2.42E-08  |
| NCR1  | rs7532674   | 1  | 207853394 | T | G | 0.27 | 0.07  | 0.01 | 6.02E-08  |
| NCR1  | rs76529516  | 2  | 60356235  | G | A | 0.03 | 0.15  | 0.02 | 1.04E-05  |
| NCR1  | rs2009581   | 2  | 111050100 | A | G | 0.27 | -0.13 | 0.01 | 1.32E-24  |
| NCR1  | rs13104208  | 4  | 141749489 | C | T | 0.16 | 0.08  | 0.01 | 3.59E-08  |
| NCR1  | rs2248116   | 5  | 132468655 | A | C | 0.57 | -0.06 | 0.01 | 3.64E-08  |
| NCR1  | rs9260316   | 6  | 29949137  | T | G | 0.57 | -0.06 | 0.01 | 2.83E-08  |
| NCR1  | rs78565598  | 8  | 59182922  | G | T | 0.17 | 0.07  | 0.01 | 6.11E-06  |

|         |             |    |           |   |   |      |       |      |           |
|---------|-------------|----|-----------|---|---|------|-------|------|-----------|
| NCR1    | rs7086174   | 10 | 5974436   | A | C | 0.33 | 0.09  | 0.01 | 2.18E-13  |
| NCR1    | rs2787147   | 10 | 8419168   | T | A | 0.34 | 0.05  | 0.01 | 2.51E-05  |
| NCR1    | rs1250569   | 10 | 79285450  | C | T | 0.45 | 0.06  | 0.01 | 2.63E-08  |
| NCR1    | rs6586167   | 10 | 88996389  | G | T | 0.50 | 0.05  | 0.01 | 1.30E-06  |
| NCR1    | rs2497318   | 10 | 92672243  | T | C | 0.45 | 0.06  | 0.01 | 3.73E-08  |
| NCR1    | rs113430316 | 11 | 128246346 | A | T | 0.28 | -0.05 | 0.01 | 2.54E-05  |
| NCR1    | rs3003      | 12 | 10431012  | T | C | 0.84 | -0.09 | 0.01 | 7.52E-08  |
| NCR1    | rs3782473   | 12 | 51362485  | C | T | 0.24 | 0.08  | 0.01 | 6.79E-09  |
| NCR1    | rs3184504   | 12 | 111446804 | C | T | 0.52 | -0.18 | 0.01 | 2.31E-63  |
| NCR1    | rs906932    | 14 | 99318673  | C | T | 0.62 | 0.08  | 0.01 | 3.07E-13  |
| NCR1    | -           | 16 | 20343260  | T | A | 0.18 | -0.07 | 0.01 | 4.82E-06  |
| NCR1    | rs9916257   | 17 | 35470352  | T | G | 0.44 | -0.08 | 0.01 | 2.17E-13  |
| NCR1    | rs4065275   | 17 | 39924612  | G | A | 0.50 | 0.07  | 0.01 | 3.42E-10  |
| NCR1    | rs6504199   | 17 | 64083022  | A | C | 0.25 | -0.06 | 0.01 | 1.48E-05  |
| NCR1    | rs2659007   | 17 | 81243678  | A | G | 0.45 | 0.05  | 0.01 | 2.94E-06  |
| NCR1    | rs7255591   | 19 | 54904812  | C | G | 0.09 | -0.43 | 0.01 | 7.48E-107 |
| NCR1    | rs6103572   | 20 | 44029222  | C | T | 0.73 | 0.07  | 0.01 | 1.39E-07  |
| NCS1    | rs66927685  | 2  | 169074756 | A | T | 0.53 | -0.05 | 0.01 | 1.45E-06  |
| NCS1    | rs11134475  | 5  | 156972939 | G | A | 0.64 | 0.05  | 0.01 | 8.04E-06  |
| NCS1    | -           | 6  | 24429112  | C | T | 0.00 | -0.99 | 0.05 | 1.23E-34  |
| NCS1    | rs662       | 7  | 95308134  | C | T | 0.29 | 0.06  | 0.01 | 2.15E-07  |
| NCS1    | rs12342201  | 9  | 93132682  | A | G | 0.48 | -0.07 | 0.01 | 1.65E-11  |
| NCS1    | rs1054879   | 9  | 130233489 | A | G | 0.51 | 0.12  | 0.01 | 1.62E-29  |
| NCS1    | rs7902343   | 10 | 63245639  | T | C | 0.47 | 0.05  | 0.01 | 6.15E-06  |
| NCS1    | rs9807819   | 19 | 45736340  | T | C | 0.36 | -0.05 | 0.01 | 6.20E-07  |
| NCS1    | rs2868346   | 20 | 45919331  | T | C | 0.76 | 0.05  | 0.01 | 7.55E-06  |
| NECTIN2 | rs61747728  | 1  | 179557079 | T | C | 0.04 | 0.18  | 0.02 | 7.35E-10  |
| NECTIN2 | rs553340154 | 6  | 32558001  | G | T | 0.33 | 0.07  | 0.01 | 5.73E-06  |
| NECTIN2 | -           | 9  | 133263362 | G | A | 0.18 | -0.10 | 0.01 | 3.94E-11  |
| NECTIN2 | rs777834943 | 16 | 20355409  | T | C | 0.18 | -0.08 | 0.01 | 9.17E-08  |
| NECTIN2 | rs1137844   | 19 | 35852177  | G | C | 0.32 | 0.06  | 0.01 | 5.76E-07  |
| NECTIN2 | rs440277    | 19 | 44857967  | A | G | 0.31 | -0.18 | 0.01 | 1.90E-48  |
| NECTIN2 | rs679574    | 19 | 48702851  | G | C | 0.51 | -0.16 | 0.01 | 4.25E-43  |
| NECTIN4 | rs35434391  | 1  | 161079719 | T | G | 0.12 | -0.45 | 0.01 | 1.26E-143 |
| NECTIN4 | rs61747728  | 1  | 179557079 | T | C | 0.04 | 0.15  | 0.02 | 5.22E-07  |
| NECTIN4 | rs1260326   | 2  | 27508073  | C | T | 0.61 | 0.07  | 0.01 | 3.98E-09  |
| NECTIN4 | rs77784890  | 10 | 69439539  | C | G | 0.14 | 0.10  | 0.01 | 1.28E-09  |
| NECTIN4 | rs77924615  | 16 | 20381010  | A | G | 0.20 | -0.08 | 0.01 | 1.46E-08  |
| NECTIN4 | rs3814995   | 19 | 35851310  | T | C | 0.31 | 0.06  | 0.01 | 4.80E-06  |
| NEFL    | rs4235739   | 5  | 148987008 | C | T | 0.61 | 0.04  | 0.01 | 2.60E-05  |
| NEFL    | rs7197999   | 16 | 75245022  | T | C | 0.52 | 0.04  | 0.01 | 1.26E-05  |
| NELL1   | rs10890482  | 1  | 47480761  | C | T | 0.81 | 0.08  | 0.01 | 3.42E-08  |
| NELL1   | rs2990223   | 1  | 155215184 | G | A | 0.61 | 0.06  | 0.01 | 3.91E-08  |
| NELL1   | rs4344946   | 2  | 119432144 | G | A | 0.86 | -0.10 | 0.01 | 6.99E-11  |
| NELL1   | rs3903119   | 2  | 176127715 | C | T | 0.66 | -0.06 | 0.01 | 2.35E-07  |
| NELL1   | -           | 3  | 186932142 | C | G | 0.62 | 0.07  | 0.01 | 1.33E-10  |
| NELL1   | rs13107325  | 4  | 102267552 | T | C | 0.08 | 0.18  | 0.01 | 7.27E-18  |
| NELL1   | rs9501590   | 6  | 31396607  | G | A | 0.34 | 0.05  | 0.01 | 5.76E-06  |
| NELL1   | rs2207136   | 6  | 50842007  | C | T | 0.47 | -0.05 | 0.01 | 9.69E-07  |
| NELL1   | rs11458788  | 6  | 100505171 | C | A | 0.51 | 0.05  | 0.01 | 3.11E-06  |
| NELL1   | rs62435145  | 7  | 1246931   | T | G | 0.69 | 0.05  | 0.01 | 2.74E-05  |
| NELL1   | rs2339228   | 8  | 90722254  | A | G | 0.50 | 0.06  | 0.01 | 7.54E-09  |
| NELL1   | rs56278466  | 10 | 17833858  | G | T | 0.66 | 0.06  | 0.01 | 4.01E-08  |
| NELL1   | rs7917848   | 10 | 28705933  | G | C | 0.65 | -0.10 | 0.01 | 1.62E-18  |
| NELL1   | rs61652119  | 11 | 20933724  | A | G | 0.05 | 0.79  | 0.02 | 1.99E-211 |
| NELL1   | rs542695580 | 11 | 30738234  | T | C | 0.37 | 0.07  | 0.01 | 9.27E-08  |

|        |             |    |           |   |   |      |       |      |           |
|--------|-------------|----|-----------|---|---|------|-------|------|-----------|
| NELL1  | rs375125008 | 11 | 65739571  | C | T | 0.38 | -0.06 | 0.01 | 5.90E-08  |
| NELL1  | rs2298475   | 11 | 126408308 | C | T | 0.08 | -0.16 | 0.01 | 2.10E-14  |
| NELL1  | rs7298766   | 12 | 552490    | G | A | 0.29 | 0.23  | 0.01 | 1.11E-86  |
| NELL1  | rs141826184 | 12 | 57184132  | T | C | 0.00 | 0.82  | 0.05 | 1.57E-24  |
| NELL1  | rs111279508 | 12 | 132533176 | T | C | 0.14 | 0.13  | 0.01 | 5.42E-16  |
| NELL1  | -           | 14 | 65602338  | A | C | 0.68 | -0.08 | 0.01 | 1.33E-12  |
| NELL1  | rs4541022   | 15 | 93623083  | T | C | 0.88 | -0.08 | 0.01 | 2.50E-06  |
| NELL1  | rs186021206 | 17 | 7166093   | A | G | 0.01 | 0.64  | 0.05 | 3.32E-18  |
| NELL1  | rs72835417  | 17 | 49164280  | A | G | 0.11 | 0.14  | 0.01 | 6.70E-16  |
| NELL2  | rs17285324  | 3  | 46441489  | T | A | 0.17 | -0.07 | 0.01 | 1.00E-06  |
| NELL2  | rs4282054   | 3  | 52532049  | C | T | 0.56 | 0.07  | 0.01 | 3.83E-09  |
| NELL2  | rs201147962 | 3  | 58477962  | T | C | 0.61 | 0.05  | 0.01 | 2.20E-06  |
| NELL2  | rs55818129  | 5  | 39424990  | G | T | 0.12 | -0.08 | 0.01 | 7.27E-06  |
| NELL2  | rs155625    | 5  | 72911035  | G | T | 0.32 | -0.05 | 0.01 | 6.66E-06  |
| NELL2  | rs113239947 | 6  | 31494179  | T | A | 0.24 | -0.07 | 0.01 | 1.40E-07  |
| NELL2  | rs7849148   | 9  | 33138354  | T | A | 0.31 | 0.06  | 0.01 | 1.65E-07  |
| NELL2  | rs2519093   | 9  | 133266456 | T | C | 0.18 | -0.19 | 0.01 | 3.05E-44  |
| NELL2  | rs56278466  | 10 | 17833858  | G | T | 0.66 | 0.06  | 0.01 | 5.86E-08  |
| NELL2  | rs76485191  | 11 | 21170687  | T | G | 0.34 | 0.05  | 0.01 | 6.68E-06  |
| NELL2  | rs36027301  | 11 | 68041801  | T | C | 0.06 | -0.12 | 0.02 | 1.86E-07  |
| NELL2  | rs142457851 | 12 | 44999589  | A | C | 0.60 | -0.18 | 0.01 | 8.59E-57  |
| NELL2  | rs540730    | 12 | 57413331  | C | T | 0.75 | -0.07 | 0.01 | 4.13E-07  |
| NELL2  | rs7137828   | 12 | 111494996 | T | C | 0.52 | -0.05 | 0.01 | 2.18E-05  |
| NELL2  | rs186021206 | 17 | 7166093   | A | G | 0.01 | 0.43  | 0.05 | 1.58E-08  |
| NELL2  | rs4804790   | 19 | 7732268   | T | G | 0.07 | -0.13 | 0.01 | 9.79E-10  |
| NELL2  | rs9616810   | 22 | 50656498  | T | C | 0.22 | 0.06  | 0.01 | 1.22E-05  |
| NFASC  | rs6693024   | 1  | 204976361 | A | C | 0.10 | 0.59  | 0.01 | 2.40E-239 |
| NFASC  | rs115478735 | 9  | 133274295 | T | A | 0.18 | -0.09 | 0.01 | 6.62E-11  |
| NFASC  | rs56278466  | 10 | 17833858  | G | T | 0.66 | 0.17  | 0.01 | 9.95E-57  |
| NFASC  | rs58534292  | 14 | 21737747  | C | T | 0.65 | 0.05  | 0.01 | 7.45E-07  |
| NFASC  | rs12895651  | 14 | 106038037 | C | T | 0.70 | 0.09  | 0.01 | 8.22E-14  |
| NFASC  | rs3747207   | 22 | 43928975  | A | G | 0.22 | 0.06  | 0.01 | 5.93E-07  |
| NFATC1 | rs342293    | 7  | 106731773 | G | C | 0.46 | -0.05 | 0.01 | 2.38E-05  |
| NFATC1 | rs657693    | 18 | 79402462  | G | A | 0.36 | -0.11 | 0.01 | 1.32E-22  |
| NFATC3 | rs74661798  | 6  | 32501898  | A | T | 0.16 | 0.13  | 0.01 | 3.42E-13  |
| NFATC3 | rs13263709  | 8  | 80374940  | C | T | 0.65 | 0.06  | 0.01 | 1.13E-06  |
| NFATC3 | -           | 19 | 1489737   | G | C | 0.06 | -0.14 | 0.02 | 1.40E-08  |
| NFKBIE | rs1354034   | 3  | 56815721  | C | T | 0.60 | 0.06  | 0.01 | 1.20E-06  |
| NFKBIE | rs28362856  | 6  | 44266802  | C | G | 0.04 | -0.52 | 0.02 | 6.16E-78  |
| NID1   | rs41267433  | 1  | 156904629 | G | C | 0.11 | 0.08  | 0.01 | 6.12E-06  |
| NID1   | rs76183323  | 1  | 236067017 | A | G | 0.01 | -0.76 | 0.04 | 3.59E-39  |
| NID1   | rs13412535  | 2  | 224010157 | A | G | 0.23 | -0.07 | 0.01 | 2.26E-07  |
| NID1   | rs11719450  | 3  | 58471084  | T | C | 0.37 | 0.06  | 0.01 | 4.12E-08  |
| NID1   | rs34716199  | 5  | 72897488  | T | A | 0.54 | 0.06  | 0.01 | 3.28E-07  |
| NID1   | rs4098923   | 6  | 31225979  | G | A | 0.45 | -0.06 | 0.01 | 3.97E-08  |
| NID1   | rs342299    | 7  | 106733272 | T | C | 0.46 | -0.05 | 0.01 | 2.49E-06  |
| NID1   | rs4734879   | 8  | 105570896 | G | A | 0.27 | -0.06 | 0.01 | 4.65E-06  |
| NID1   | rs927826    | 10 | 19931917  | T | G | 0.71 | 0.18  | 0.01 | 1.09E-50  |
| NID1   | rs10761731  | 10 | 63267850  | T | A | 0.41 | 0.09  | 0.01 | 5.43E-15  |
| NID1   | rs12445050  | 16 | 81837364  | T | C | 0.14 | 0.09  | 0.01 | 1.17E-08  |
| NID1   | rs892090    | 19 | 55027704  | G | T | 0.83 | 0.13  | 0.01 | 8.91E-18  |
| NID2   | rs13412535  | 2  | 224010157 | A | G | 0.23 | -0.06 | 0.01 | 2.03E-06  |
| NID2   | rs7618405   | 3  | 18209017  | A | C | 0.20 | -0.06 | 0.01 | 2.12E-05  |
| NID2   | rs1354034   | 3  | 56815721  | C | T | 0.60 | -0.06 | 0.01 | 1.85E-07  |
| NID2   | rs755492124 | 4  | 101856385 | T | G | 0.39 | -0.06 | 0.01 | 4.52E-08  |
| NID2   | rs274555    | 5  | 132387259 | T | C | 0.40 | 0.05  | 0.01 | 2.71E-06  |

|        |             |    |           |   |   |      |       |      |           |
|--------|-------------|----|-----------|---|---|------|-------|------|-----------|
| NID2   | rs35173808  | 6  | 31358371  | A | C | 0.10 | -0.10 | 0.01 | 1.10E-07  |
| NID2   | rs1917342   | 6  | 70640051  | G | A | 0.30 | -0.05 | 0.01 | 4.41E-06  |
| NID2   | rs6961069   | 7  | 80589645  | T | C | 0.40 | 0.06  | 0.01 | 2.93E-08  |
| NID2   | rs6993770   | 8  | 105569300 | T | A | 0.29 | -0.10 | 0.01 | 3.67E-17  |
| NID2   | rs10820606  | 9  | 96430637  | C | A | 0.23 | -0.08 | 0.01 | 2.58E-09  |
| NID2   | rs10740118  | 10 | 63341447  | C | G | 0.41 | 0.09  | 0.01 | 2.44E-16  |
| NID2   | rs12767683  | 10 | 102556824 | A | C | 0.32 | 0.06  | 0.01 | 7.69E-07  |
| NID2   | rs35277580  | 12 | 6185368   | A | G | 0.49 | -0.05 | 0.01 | 2.54E-06  |
| NID2   | rs2516600   | 14 | 52021048  | C | T | 0.54 | 0.57  | 0.01 | 0.00E+00  |
| NID2   | rs59001897  | 15 | 64868193  | A | T | 0.17 | 0.07  | 0.01 | 2.34E-06  |
| NID2   | rs12445050  | 16 | 81837364  | T | C | 0.14 | 0.10  | 0.01 | 1.64E-11  |
| NID2   | rs892090    | 19 | 55027704  | G | T | 0.83 | 0.15  | 0.01 | 3.29E-25  |
| NID2   | rs3827978   | 20 | 19300647  | T | C | 0.35 | 0.07  | 0.01 | 6.58E-10  |
| NINJ1  | rs9274442   | 6  | 32665454  | C | G | 0.28 | -0.08 | 0.01 | 4.47E-09  |
| NINJ1  | rs11379524  | 9  | 93120463  | C | A | 0.63 | 0.24  | 0.01 | 8.74E-90  |
| NME3   | rs188468174 | 1  | 24965206  | T | C | 0.01 | -0.35 | 0.03 | 2.54E-13  |
| NME3   | rs57008601  | 2  | 203110811 | G | T | 0.57 | -0.05 | 0.01 | 2.23E-06  |
| NME3   | rs796157456 | 4  | 39636708  | A | C | 0.50 | 0.05  | 0.01 | 9.19E-06  |
| NME3   | rs34230118  | 5  | 96939216  | T | C | 0.42 | 0.08  | 0.01 | 5.13E-12  |
| NME3   | rs1014651   | 9  | 100214362 | A | G | 0.53 | 0.05  | 0.01 | 1.14E-05  |
| NME3   | rs2519093   | 9  | 133266456 | T | C | 0.18 | -0.11 | 0.01 | 3.49E-15  |
| NME3   | rs10842845  | 12 | 9085616   | C | G | 0.35 | -0.25 | 0.01 | 9.18E-104 |
| NME3   | rs2278093   | 12 | 29381276  | A | C | 0.29 | -0.06 | 0.01 | 6.73E-06  |
| NME3   | rs12424638  | 12 | 48925017  | A | G | 0.08 | -0.12 | 0.01 | 7.11E-08  |
| NME3   | rs55707100  | 15 | 43528519  | T | C | 0.02 | -0.18 | 0.02 | 1.52E-06  |
| NME3   | rs749285440 | 16 | 1718075   | A | G | 0.00 | 3.07  | 0.11 | 4.78E-80  |
| NME3   | rs1801689   | 17 | 66214462  | C | A | 0.03 | 0.16  | 0.02 | 1.98E-06  |
| NME3   | rs140664781 | 19 | 3199725   | G | C | 0.44 | 0.10  | 0.01 | 2.83E-16  |
| NME3   | rs7599      | 19 | 35547488  | G | A | 0.63 | -0.15 | 0.01 | 3.53E-39  |
| NME3   | rs12975366  | 19 | 54255498  | C | T | 0.39 | -0.08 | 0.01 | 1.19E-11  |
| NME3   | rs5749077   | 22 | 30364829  | C | A | 0.23 | 0.06  | 0.01 | 7.41E-06  |
| NMNAT1 | rs180754466 | 1  | 9960737   | A | C | 0.01 | 0.67  | 0.04 | 8.00E-30  |
| NMNAT1 | rs9271573   | 6  | 32622724  | C | A | 0.60 | 0.06  | 0.01 | 8.73E-07  |
| NMNAT1 | rs58534292  | 14 | 21737747  | C | T | 0.65 | -0.09 | 0.01 | 8.94E-14  |
| NMNAT1 | rs111266381 | 14 | 105998918 | T | C | 0.15 | -0.19 | 0.01 | 3.22E-36  |
| NMNAT1 | rs704       | 17 | 28367840  | A | G | 0.47 | -0.20 | 0.01 | 6.27E-77  |
| NOMO1  | rs111779744 | 5  | 180809824 | A | C | 0.15 | 0.08  | 0.01 | 4.13E-08  |
| NOMO1  | rs174549    | 11 | 61803910  | A | G | 0.31 | 0.07  | 0.01 | 4.38E-10  |
| NOMO1  | rs28929474  | 14 | 94378610  | T | C | 0.02 | 0.39  | 0.02 | 3.69E-26  |
| NOMO1  | rs3891245   | 16 | 16254430  | G | T | 0.23 | -0.51 | 0.01 | 0.00E+00  |
| NOMO1  | rs1801689   | 17 | 66214462  | C | A | 0.03 | 0.18  | 0.02 | 7.81E-09  |
| NOS1   | rs12574283  | 11 | 22233940  | A | G | 0.71 | 0.07  | 0.01 | 3.03E-08  |
| NOS1   | rs10651018  | 12 | 117459359 | G | A | 0.46 | -0.11 | 0.01 | 2.44E-25  |
| NOS3   | rs7572209   | 2  | 85862949  | C | T | 0.20 | -0.08 | 0.01 | 1.51E-08  |
| NOS3   | rs6415128   | 6  | 32363117  | A | G | 0.56 | 0.05  | 0.01 | 1.15E-05  |
| NOS3   | -           | 9  | 133266234 | C | A | 0.34 | 0.07  | 0.01 | 8.08E-08  |
| NOS3   | rs189448562 | 20 | 3724468   | C | G | 0.01 | 0.24  | 0.04 | 2.31E-05  |
| NOTCH1 | rs1260326   | 2  | 27508073  | C | T | 0.61 | 0.06  | 0.01 | 8.42E-07  |
| NOTCH1 | rs4240624   | 8  | 9326721   | A | G | 0.91 | -0.10 | 0.01 | 1.49E-07  |
| NOTCH1 | rs10793962  | 9  | 133253728 | T | A | 0.06 | 0.52  | 0.02 | 1.32E-113 |
| NOTCH1 | rs182330532 | 9  | 136506782 | A | G | 0.00 | 1.22  | 0.11 | 1.06E-13  |
| NOTCH1 | rs56278466  | 10 | 17833858  | G | T | 0.66 | 0.08  | 0.01 | 3.56E-11  |
| NOTCH1 | rs34434834  | 11 | 126437901 | A | G | 0.03 | 0.14  | 0.02 | 1.75E-05  |
| NOTCH1 | rs111338191 | 12 | 111388673 | T | A | 0.52 | -0.05 | 0.01 | 3.80E-06  |
| NOTCH1 | rs186021206 | 17 | 7166093   | A | G | 0.01 | 0.63  | 0.05 | 1.14E-16  |
| NOTCH3 | rs61801010  | 1  | 161572445 | G | A | 0.11 | 0.10  | 0.01 | 7.47E-08  |

|        |             |    |           |   |   |      |       |      |           |
|--------|-------------|----|-----------|---|---|------|-------|------|-----------|
| NOTCH3 | rs1260326   | 2  | 27508073  | C | T | 0.61 | 0.07  | 0.01 | 8.70E-10  |
| NOTCH3 | rs10282122  | 7  | 2489989   | T | C | 0.67 | 0.07  | 0.01 | 3.65E-09  |
| NOTCH3 | rs774272255 | 7  | 95307072  | T | A | 0.28 | 0.06  | 0.01 | 1.48E-06  |
| NOTCH3 | rs507666    | 9  | 133273983 | A | G | 0.18 | -0.07 | 0.01 | 1.59E-07  |
| NOTCH3 | rs12359178  | 10 | 17847614  | A | G | 0.14 | 0.08  | 0.01 | 4.41E-07  |
| NOTCH3 | -           | 12 | 57001714  | G | A | 0.08 | 0.11  | 0.01 | 3.03E-09  |
| NOTCH3 | rs17580     | 14 | 94380925  | A | T | 0.05 | -0.15 | 0.02 | 3.96E-09  |
| NOTCH3 | rs139974673 | 15 | 43735687  | C | T | 0.02 | -0.21 | 0.02 | 2.32E-09  |
| NOTCH3 | rs186021206 | 17 | 7166093   | A | G | 0.01 | 0.48  | 0.05 | 7.96E-11  |
| NOTCH3 | rs77542162  | 17 | 69085137  | G | A | 0.02 | 0.19  | 0.02 | 1.84E-07  |
| NOTCH3 | rs539420095 | 19 | 15417974  | T | C | 0.00 | -1.17 | 0.06 | 1.05E-34  |
| NOTCH3 | rs28616221  | 19 | 35063575  | A | G | 0.18 | -0.06 | 0.01 | 5.84E-06  |
| NPDC1  | rs13146355  | 4  | 76490987  | A | G | 0.46 | 0.05  | 0.01 | 4.46E-06  |
| NPDC1  | rs10265221  | 7  | 151717243 | C | T | 0.29 | 0.06  | 0.01 | 7.03E-07  |
| NPDC1  | -           | 9  | 137059328 | C | G | 0.90 | 0.18  | 0.01 | 2.16E-22  |
| NPDC1  | rs34749116  | 12 | 130796207 | A | G | 0.33 | 0.05  | 0.01 | 1.61E-05  |
| NPDC1  | rs548328000 | 14 | 91830655  | A | C | 0.58 | -0.06 | 0.01 | 1.58E-08  |
| NPDC1  | rs36060036  | 16 | 20350628  | T | C | 0.17 | -0.09 | 0.01 | 7.96E-09  |
| NPDC1  | rs11672900  | 19 | 48717066  | G | A | 0.54 | 0.06  | 0.01 | 8.75E-07  |
| NPPB   | rs198389    | 1  | 11859214  | G | A | 0.42 | 0.18  | 0.01 | 2.85E-56  |
| NPPB   | rs2234962   | 10 | 119670121 | C | T | 0.22 | 0.07  | 0.01 | 8.66E-07  |
| NPPC   | rs77806605  | 2  | 49134522  | G | C | 0.27 | 0.05  | 0.01 | 1.44E-05  |
| NPPC   | rs4859682   | 4  | 76489165  | A | C | 0.46 | 0.05  | 0.01 | 2.73E-06  |
| NPPC   | rs113878851 | 16 | 20353760  | T | C | 0.17 | -0.06 | 0.01 | 1.65E-05  |
| NPTX1  | rs78265569  | 1  | 2214726   | A | C | 0.09 | 0.10  | 0.01 | 7.42E-09  |
| NPTX1  | -           | 1  | 27373179  | A | G | 0.01 | -0.33 | 0.03 | 6.74E-15  |
| NPTX1  | rs12025349  | 1  | 213767438 | T | C | 0.60 | 0.10  | 0.01 | 1.77E-21  |
| NPTX1  | rs13064675  | 3  | 24188797  | C | T | 0.20 | -0.06 | 0.01 | 3.13E-06  |
| NPTX1  | rs4693802   | 4  | 87058060  | G | A | 0.25 | -0.06 | 0.01 | 8.67E-08  |
| NPTX1  | rs66833621  | 6  | 6923601   | C | T | 0.19 | 0.12  | 0.01 | 1.93E-20  |
| NPTX1  | rs16896742  | 6  | 29954963  | G | A | 0.36 | -0.24 | 0.01 | 1.36E-116 |
| NPTX1  | rs10986338  | 9  | 124428953 | A | G | 0.65 | 0.05  | 0.01 | 5.68E-06  |
| NPTX1  | rs2519093   | 9  | 133266456 | T | C | 0.18 | -0.10 | 0.01 | 1.22E-14  |
| NPTX1  | rs10786548  | 10 | 99496569  | A | G | 0.89 | 0.07  | 0.01 | 9.33E-06  |
| NPTX1  | rs7937122   | 11 | 126354553 | G | C | 0.39 | 0.08  | 0.01 | 3.74E-14  |
| NPTX1  | rs186021206 | 17 | 7166093   | A | G | 0.01 | 0.71  | 0.05 | 2.10E-21  |
| NPTX1  | rs62068268  | 17 | 80565290  | T | C | 0.09 | 0.82  | 0.01 | 0.00E+00  |
| NPTX1  | rs4806469   | 19 | 55186877  | A | G | 0.19 | 0.06  | 0.01 | 2.80E-06  |
| NPTX1  | rs7280064   | 21 | 15005329  | T | C | 0.15 | 0.07  | 0.01 | 9.85E-07  |
| NPTXR  | rs9273211   | 6  | 32645903  | A | G | 0.23 | -0.06 | 0.01 | 2.84E-06  |
| NPTXR  | rs61007246  | 7  | 98654503  | T | C | 0.71 | 0.09  | 0.01 | 6.56E-16  |
| NPTXR  | rs12216891  | 9  | 133251979 | T | C | 0.06 | 0.10  | 0.01 | 2.36E-05  |
| NPTXR  | rs369705328 | 10 | 17806193  | C | G | 0.13 | 0.09  | 0.01 | 2.46E-08  |
| NPTXR  | rs186021206 | 17 | 7166093   | A | G | 0.01 | 0.31  | 0.05 | 1.63E-05  |
| NPTXR  | rs111577133 | 22 | 38845257  | G | A | 0.02 | 2.00  | 0.03 | 0.00E+00  |
| NPY    | rs765974791 | 1  | 62541132  | T | C | 0.64 | 0.07  | 0.01 | 1.36E-08  |
| NPY    | rs1499899   | 3  | 113192413 | A | G | 0.49 | -0.05 | 0.01 | 2.11E-05  |
| NPY    | rs5030062   | 3  | 186736391 | C | A | 0.37 | -0.10 | 0.01 | 2.00E-19  |
| NPY    | rs4861708   | 4  | 186236079 | A | G | 0.51 | -0.19 | 0.01 | 6.41E-65  |
| NPY    | rs639933    | 5  | 135132061 | A | C | 0.63 | 0.06  | 0.01 | 2.44E-06  |
| NPY    | rs1801020   | 5  | 177409531 | G | A | 0.74 | -0.09 | 0.01 | 1.87E-11  |
| NPY    | rs34713112  | 6  | 32640812  | A | T | 0.65 | 0.06  | 0.01 | 1.88E-06  |
| NPY    | rs56393506  | 6  | 160668275 | T | C | 0.17 | 0.07  | 0.01 | 8.47E-07  |
| NPY    | rs9718966   | 7  | 506159    | C | G | 0.51 | 0.06  | 0.01 | 6.94E-07  |
| NPY    | rs4722337   | 7  | 24269479  | T | A | 0.55 | -0.16 | 0.01 | 1.61E-46  |
| NPY    | rs33951980  | 7  | 73615107  | T | C | 0.13 | -0.08 | 0.01 | 1.98E-06  |

|        |             |    |           |   |   |      |       |      |           |
|--------|-------------|----|-----------|---|---|------|-------|------|-----------|
| NPY    | rs76722925  | 8  | 20073987  | G | A | 0.08 | -0.09 | 0.01 | 1.95E-05  |
| NPY    | rs200235517 | 8  | 116618774 | G | A | 0.08 | 0.17  | 0.01 | 1.10E-17  |
| NPY    | -           | 8  | 125492141 | C | T | 0.60 | -0.08 | 0.01 | 7.98E-10  |
| NPY    | -           | 11 | 116752497 | T | A | 0.86 | -0.13 | 0.01 | 1.30E-15  |
| NPY    | rs1809844   | 16 | 86154405  | T | C | 0.50 | -0.06 | 0.01 | 8.19E-07  |
| NPY    | rs77542162  | 17 | 69085137  | G | A | 0.02 | 0.30  | 0.02 | 6.57E-16  |
| NPY    | rs72654473  | 19 | 44911142  | A | C | 0.11 | 0.15  | 0.01 | 8.18E-17  |
| NRCAM  | rs61804210  | 1  | 161701037 | T | C | 0.10 | 0.10  | 0.01 | 4.05E-08  |
| NRCAM  | rs1260326   | 2  | 27508073  | C | T | 0.61 | 0.07  | 0.01 | 4.22E-09  |
| NRCAM  | rs34656207  | 6  | 32614824  | T | C | 0.36 | 0.06  | 0.01 | 1.61E-06  |
| NRCAM  | rs138528835 | 7  | 108346905 | A | T | 0.31 | 0.29  | 0.01 | 7.53E-127 |
| NRCAM  | rs532436    | 9  | 133274414 | A | G | 0.19 | -0.11 | 0.01 | 4.20E-14  |
| NRCAM  | rs56278466  | 10 | 17833858  | G | T | 0.66 | 0.14  | 0.01 | 2.92E-32  |
| NRCAM  | rs1265564   | 12 | 111270654 | C | A | 0.44 | 0.05  | 0.01 | 5.17E-06  |
| NRCAM  | rs186021206 | 17 | 7166093   | A | G | 0.01 | 0.38  | 0.05 | 8.19E-07  |
| NRP1   | rs777231403 | 1  | 62634374  | A | G | 0.35 | 0.09  | 0.01 | 7.16E-16  |
| NRP1   | rs764992666 | 1  | 230159329 | T | C | 0.60 | 0.21  | 0.01 | 3.38E-81  |
| NRP1   | rs2090034   | 2  | 20172648  | A | G | 0.47 | -0.05 | 0.01 | 1.91E-06  |
| NRP1   | rs1260326   | 2  | 27508073  | C | T | 0.61 | 0.07  | 0.01 | 3.40E-09  |
| NRP1   | rs35332062  | 7  | 73597712  | A | G | 0.13 | 0.09  | 0.01 | 1.73E-07  |
| NRP1   | rs2506150   | 10 | 33194380  | A | G | 0.36 | -0.30 | 0.01 | 1.02E-151 |
| NRP1   | -           | 11 | 116752497 | T | A | 0.86 | -0.10 | 0.01 | 6.21E-11  |
| NRP1   | rs186021206 | 17 | 7166093   | A | G | 0.01 | 0.60  | 0.05 | 2.21E-15  |
| NRP1   | rs77542162  | 17 | 69085137  | G | A | 0.02 | 0.21  | 0.02 | 1.29E-08  |
| NRP2   | rs12995151  | 2  | 62375303  | G | A | 0.20 | 0.06  | 0.01 | 1.59E-05  |
| NRP2   | rs2289023   | 2  | 205121597 | G | A | 0.23 | -0.20 | 0.01 | 3.24E-51  |
| NRP2   | rs17285324  | 3  | 46441489  | T | A | 0.17 | -0.08 | 0.01 | 2.75E-07  |
| NRP2   | rs13081028  | 3  | 52521300  | A | G | 0.56 | 0.06  | 0.01 | 5.85E-07  |
| NRP2   | rs55818129  | 5  | 39424990  | G | T | 0.12 | -0.07 | 0.01 | 2.13E-05  |
| NRP2   | rs3132485   | 6  | 31275612  | A | C | 0.50 | -0.07 | 0.01 | 6.72E-11  |
| NRP2   | rs949451    | 7  | 17818931  | G | A | 0.51 | -0.06 | 0.01 | 3.46E-08  |
| NRP2   | -           | 11 | 44570719  | T | A | 0.78 | -0.06 | 0.01 | 7.52E-06  |
| NRP2   | rs2137537   | 12 | 70719307  | C | T | 0.55 | -0.05 | 0.01 | 2.67E-05  |
| NRP2   | rs1070073   | 12 | 103606541 | G | T | 0.67 | 0.08  | 0.01 | 5.94E-11  |
| NRTN   | rs36055559  | 19 | 5799422   | A | G | 0.17 | -0.07 | 0.01 | 7.07E-06  |
| NSFL1C | rs1354034   | 3  | 56815721  | C | T | 0.60 | 0.06  | 0.01 | 2.72E-08  |
| NSFL1C | rs6033860   | 20 | 1467930   | G | A | 0.28 | -0.09 | 0.01 | 1.48E-12  |
| NT5C3A | rs1354034   | 3  | 56815721  | C | T | 0.60 | 0.06  | 0.01 | 1.31E-06  |
| NT5C3A | rs17622656  | 5  | 132485305 | A | G | 0.39 | -0.05 | 0.01 | 1.65E-05  |
| NT5C3A | rs10252880  | 7  | 33071047  | C | G | 0.33 | -0.11 | 0.01 | 5.64E-19  |
| NT5C3A | rs6993770   | 8  | 105569300 | T | A | 0.29 | -0.06 | 0.01 | 3.88E-07  |
| NT5C3A | -           | 10 | 63156270  | A | T | 0.49 | 0.07  | 0.01 | 7.46E-09  |
| NT5E   | rs1497406   | 1  | 16178825  | G | A | 0.58 | 0.06  | 0.01 | 3.65E-09  |
| NT5E   | rs7429191   | 3  | 149395293 | A | G | 0.71 | 0.05  | 0.01 | 1.59E-06  |
| NT5E   | rs13107325  | 4  | 102267552 | T | C | 0.08 | -0.09 | 0.01 | 1.61E-06  |
| NT5E   | rs4835265   | 4  | 145900258 | A | C | 0.16 | 0.12  | 0.01 | 1.56E-17  |
| NT5E   | rs10075805  | 5  | 31021251  | G | A | 0.28 | -0.06 | 0.01 | 1.36E-06  |
| NT5E   | rs2229523   | 6  | 85489515  | G | A | 0.66 | -0.59 | 0.01 | 0.00E+00  |
| NT5E   | rs174557    | 11 | 61813896  | G | A | 0.31 | 0.06  | 0.01 | 3.66E-08  |
| NT5E   | rs550999044 | 14 | 103101069 | T | A | 0.24 | 0.11  | 0.01 | 1.02E-21  |
| NT5E   | rs12373325  | 18 | 58420416  | C | T | 0.80 | -0.08 | 0.01 | 5.27E-10  |
| NT5E   | rs601338    | 19 | 48703417  | A | G | 0.51 | 0.06  | 0.01 | 4.38E-08  |
| NT5E   | rs189448562 | 20 | 3724468   | C | G | 0.01 | 0.33  | 0.03 | 2.23E-11  |
| NT5E   | rs6076335   | 20 | 25334228  | G | T | 0.48 | 0.05  | 0.01 | 1.46E-06  |
| NTF3   | rs13402475  | 2  | 3592319   | G | C | 0.82 | -0.08 | 0.01 | 4.65E-08  |
| NTF3   | rs10868235  | 9  | 84878840  | T | C | 0.53 | -0.08 | 0.01 | 1.77E-13  |



|          |             |    |           |   |   |      |       |      |           |
|----------|-------------|----|-----------|---|---|------|-------|------|-----------|
| NTF3     | rs73039984  | 12 | 5440290   | T | C | 0.11 | -0.23 | 0.01 | 1.42E-37  |
| NTF3     | rs117126605 | 15 | 88248996  | C | T | 0.02 | -0.36 | 0.03 | 4.88E-17  |
| NTF3     | rs11151953  | 18 | 74456625  | C | G | 0.53 | 0.09  | 0.01 | 5.27E-14  |
| NTF4     | rs8002440   | 13 | 73617497  | T | C | 0.49 | -0.05 | 0.01 | 2.02E-05  |
| NTproBNP | rs198389    | 1  | 11859214  | G | A | 0.42 | 0.26  | 0.01 | 3.23E-131 |
| NTproBNP | rs3800560   | 7  | 128821040 | T | C | 0.08 | 0.08  | 0.01 | 1.13E-05  |
| NTproBNP | rs72671655  | 8  | 105335669 | A | T | 0.04 | 0.14  | 0.02 | 1.98E-07  |
| NTproBNP | rs2234962   | 10 | 119670121 | C | T | 0.22 | 0.09  | 0.01 | 2.75E-12  |
| NTRK2    | rs4665972   | 2  | 27375230  | C | T | 0.61 | 0.06  | 0.01 | 3.27E-07  |
| NTRK2    | rs13107325  | 4  | 102267552 | T | C | 0.08 | 0.10  | 0.01 | 2.24E-06  |
| NTRK2    | rs77562929  | 9  | 84670452  | T | G | 0.01 | 0.47  | 0.05 | 5.21E-11  |
| NTRK2    | rs56278466  | 10 | 17833858  | G | T | 0.66 | 0.08  | 0.01 | 1.44E-12  |
| NTRK2    | rs2298475   | 11 | 126408308 | C | T | 0.07 | -0.10 | 0.01 | 1.32E-06  |
| NTRK2    | rs186021206 | 17 | 7166093   | A | G | 0.01 | 0.52  | 0.05 | 1.82E-11  |
| NTRK2    | rs2008174   | 22 | 39464125  | T | C | 0.74 | -0.07 | 0.01 | 6.04E-07  |
| NTRK3    | rs34324830  | 1  | 92622298  | T | C | 0.11 | -0.09 | 0.01 | 6.99E-08  |
| NTRK3    | rs7340151   | 2  | 9525321   | T | C | 0.67 | 0.06  | 0.01 | 3.47E-06  |
| NTRK3    | rs35887873  | 11 | 126349501 | C | T | 0.23 | 0.06  | 0.01 | 5.50E-06  |
| NTRK3    | rs10777159  | 12 | 89385567  | G | A | 0.30 | -0.05 | 0.01 | 2.75E-05  |
| NTRK3    | rs3184504   | 12 | 111446804 | C | T | 0.52 | 0.08  | 0.01 | 2.31E-12  |
| NTRK3    | rs79445108  | 14 | 103726687 | A | G | 0.07 | -0.16 | 0.01 | 2.71E-13  |
| NTRK3    | rs28735437  | 15 | 87971624  | C | G | 0.14 | 0.27  | 0.01 | 2.29E-65  |
| NTRK3    | rs200489612 | 17 | 7203059   | A | G | 0.01 | 0.53  | 0.05 | 8.18E-11  |
| NTRK3    | rs914187    | 21 | 41247822  | C | T | 0.60 | -0.11 | 0.01 | 8.23E-23  |
| NTRK3    | rs2413593   | 22 | 39476122  | G | A | 0.49 | 0.05  | 0.01 | 4.85E-06  |
| NUB1     | rs1354034   | 3  | 56815721  | C | T | 0.60 | 0.08  | 0.01 | 1.61E-12  |
| NUB1     | rs342298    | 7  | 106733200 | T | C | 0.46 | -0.06 | 0.01 | 2.25E-06  |
| NUB1     | rs113920358 | 7  | 151341801 | T | C | 0.13 | -0.27 | 0.01 | 1.19E-52  |
| NUB1     | rs3847326   | 10 | 63572099  | G | A | 0.48 | -0.05 | 0.01 | 1.58E-05  |
| NUB1     | rs11502185  | 11 | 180258    | C | T | 0.26 | 0.07  | 0.01 | 1.37E-06  |
| NUCB2    | rs2524096   | 6  | 31268690  | T | G | 0.42 | 0.05  | 0.01 | 2.28E-05  |
| NUCB2    | rs6993770   | 8  | 105569300 | T | A | 0.29 | -0.08 | 0.01 | 3.89E-10  |
| NUCB2    | rs214068    | 11 | 17284103  | C | T | 0.58 | -0.40 | 0.01 | 6.61E-278 |
| NUCB2    | rs3184504   | 12 | 111446804 | C | T | 0.52 | -0.05 | 0.01 | 4.41E-06  |
| NUCB2    | rs892090    | 19 | 55027704  | G | T | 0.83 | 0.08  | 0.01 | 7.35E-08  |
| NUDC     | rs1354034   | 3  | 56815721  | C | T | 0.60 | 0.08  | 0.01 | 2.69E-11  |
| NUDC     | rs342298    | 7  | 106733200 | T | C | 0.46 | -0.06 | 0.01 | 6.92E-08  |
| NUDT2    | rs1354034   | 3  | 56815721  | C | T | 0.60 | 0.05  | 0.01 | 1.36E-05  |
| NUDT2    | rs10972064  | 9  | 34336683  | T | A | 0.15 | 0.33  | 0.01 | 1.46E-99  |
| NUDT2    | -           | 10 | 63156270  | A | T | 0.49 | 0.06  | 0.01 | 2.40E-07  |
| NUDT5    | rs1354034   | 3  | 56815721  | C | T | 0.60 | 0.07  | 0.01 | 1.54E-08  |
| NUDT5    | rs10508438  | 10 | 12202080  | A | G | 0.34 | 0.06  | 0.01 | 7.20E-07  |
| NUDT5    | rs60822569  | 12 | 54323724  | C | T | 0.55 | 0.06  | 0.01 | 1.02E-06  |
| OBP2B    | rs144623173 | 1  | 9202282   | A | T | 0.41 | -0.05 | 0.01 | 5.89E-11  |
| OBP2B    | rs61685000  | 1  | 202212057 | C | G | 0.41 | -0.04 | 0.01 | 8.02E-06  |
| OBP2B    | rs12621139  | 2  | 118875148 | A | G | 0.18 | 0.07  | 0.01 | 3.26E-11  |
| OBP2B    | -           | 5  | 2485913   | C | G | 0.40 | 0.04  | 0.01 | 7.80E-06  |
| OBP2B    | rs34320230  | 7  | 98156188  | T | C | 0.54 | -0.06 | 0.01 | 7.87E-14  |
| OBP2B    | rs1825146   | 8  | 32228161  | C | A | 0.57 | -0.05 | 0.01 | 1.36E-08  |
| OBP2B    | rs4962104   | 9  | 133211660 | C | T | 0.80 | 0.70  | 0.01 | 0.00E+00  |
| OBP2B    | rs11202728  | 10 | 88350500  | G | C | 0.29 | 0.04  | 0.01 | 1.88E-06  |
| OBP2B    | rs7305932   | 12 | 7528796   | A | T | 0.78 | -0.05 | 0.01 | 4.43E-06  |
| OBP2B    | rs9543287   | 13 | 73240304  | G | C | 0.32 | -0.05 | 0.01 | 1.86E-08  |
| OBP2B    | rs8047587   | 16 | 53764710  | T | G | 0.44 | -0.04 | 0.01 | 9.26E-07  |
| OBP2B    | rs2304195   | 19 | 45059613  | T | C | 0.52 | 0.04  | 0.01 | 1.65E-05  |
| OBP2B    | rs12986064  | 19 | 54251270  | C | T | 0.51 | -0.05 | 0.01 | 2.20E-08  |

|       |             |    |           |   |   |      |       |      |           |
|-------|-------------|----|-----------|---|---|------|-------|------|-----------|
| OBP2B | rs11911496  | 21 | 39677545  | G | A | 0.49 | -0.04 | 0.01 | 9.00E-07  |
| OBP2B | rs1978060   | 22 | 19762002  | G | A | 0.61 | 0.04  | 0.01 | 9.21E-07  |
| ODAM  | rs76153614  | 4  | 70195601  | C | T | 0.05 | -0.58 | 0.02 | 5.80E-110 |
| ODAM  | rs28544078  | 4  | 111864198 | T | G | 0.24 | -0.06 | 0.01 | 3.90E-06  |
| OGFR  | rs6993770   | 8  | 105569300 | T | A | 0.29 | -0.06 | 0.01 | 7.90E-06  |
| OGFR  | rs200108407 | 20 | 62812457  | A | G | 0.00 | -1.72 | 0.10 | 1.97E-28  |
| OGN   | rs13146355  | 4  | 76490987  | A | G | 0.46 | 0.04  | 0.01 | 9.93E-06  |
| OGN   | rs7026361   | 9  | 92376282  | T | G | 0.37 | 0.59  | 0.01 | 0.00E+00  |
| OGN   | rs145678014 | 11 | 32906232  | T | G | 0.04 | -0.11 | 0.02 | 2.08E-06  |
| OGN   | rs28640218  | 16 | 20347945  | T | G | 0.19 | -0.06 | 0.01 | 6.55E-07  |
| OLR1  | rs61740470  | 3  | 46450495  | T | C | 0.01 | 0.28  | 0.04 | 7.91E-07  |
| OLR1  | rs2871960   | 3  | 141402972 | C | A | 0.45 | -0.10 | 0.01 | 2.36E-18  |
| OLR1  | rs56388170  | 7  | 28684757  | T | G | 0.29 | 0.06  | 0.01 | 1.39E-05  |
| OLR1  | -           | 11 | 47280489  | T | A | 0.11 | -0.16 | 0.01 | 2.58E-19  |
| OLR1  | rs2511241   | 11 | 73234296  | T | C | 0.93 | 0.21  | 0.01 | 1.67E-20  |
| OLR1  | rs587862    | 11 | 128725278 | G | A | 0.27 | 0.06  | 0.01 | 1.34E-05  |
| OLR1  | rs936964    | 12 | 10139536  | A | C | 0.28 | 0.11  | 0.01 | 1.60E-16  |
| OLR1  | rs11871747  | 17 | 40021029  | C | T | 0.39 | 0.07  | 0.01 | 2.71E-09  |
| OMD   | rs13081028  | 3  | 52521300  | A | G | 0.56 | 0.10  | 0.01 | 4.94E-19  |
| OMD   | rs1386625   | 4  | 38359499  | G | A | 0.90 | -0.08 | 0.01 | 2.36E-05  |
| OMD   | rs4253281   | 4  | 186243195 | A | G | 0.51 | -0.06 | 0.01 | 9.86E-08  |
| OMD   | -           | 8  | 119033245 | C | T | 0.51 | 0.07  | 0.01 | 2.38E-09  |
| OMD   | rs35209758  | 9  | 92225574  | T | A | 0.31 | 0.08  | 0.01 | 1.08E-10  |
| OMD   | rs117801489 | 12 | 104015054 | C | T | 0.02 | -0.45 | 0.03 | 2.87E-27  |
| OMD   | rs548589580 | 13 | 42399147  | A | T | 0.48 | 0.06  | 0.01 | 2.72E-08  |
| OMD   | rs704       | 17 | 28367840  | A | G | 0.47 | -0.09 | 0.01 | 4.12E-16  |
| OMD   | rs738408    | 22 | 43928850  | T | C | 0.22 | 0.06  | 0.01 | 7.04E-06  |
| OMG   | rs112168180 | 5  | 127059245 | T | C | 0.03 | -0.17 | 0.02 | 1.11E-06  |
| OMG   | rs3134986   | 6  | 32676776  | T | C | 0.29 | -0.07 | 0.01 | 6.51E-07  |
| OMG   | rs3757724   | 7  | 20355444  | T | C | 0.06 | 0.18  | 0.02 | 4.34E-15  |
| OMG   | rs35107030  | 7  | 73536765  | G | C | 0.04 | 0.18  | 0.02 | 1.13E-10  |
| OMG   | rs56278466  | 10 | 17833858  | G | T | 0.66 | 0.11  | 0.01 | 9.56E-22  |
| OMG   | rs200489612 | 17 | 7203059   | A | G | 0.01 | 0.52  | 0.05 | 3.21E-10  |
| OMG   | rs72813607  | 17 | 31134507  | A | G | 0.14 | -0.13 | 0.01 | 4.11E-15  |
| OMG   | rs17196752  | 20 | 50270731  | T | C | 0.19 | -0.07 | 0.01 | 2.66E-06  |
| OPTC  | rs139024490 | 1  | 203499664 | C | T | 0.00 | -1.71 | 0.05 | 2.97E-97  |
| OPTC  | rs78011579  | 2  | 88398520  | A | G | 0.03 | -0.25 | 0.02 | 3.44E-13  |
| OPTC  | rs10212330  | 3  | 25477342  | T | A | 0.77 | -0.06 | 0.01 | 2.33E-05  |
| OPTC  | rs67449961  | 6  | 32529773  | C | G | 0.82 | 0.09  | 0.01 | 1.84E-09  |
| OPTC  | rs2108790   | 7  | 7215848   | T | C | 0.61 | 0.05  | 0.01 | 8.20E-06  |
| OPTC  | -           | 8  | 134250701 | C | T | 0.06 | 0.18  | 0.01 | 2.17E-15  |
| OPTC  | rs55851518  | 9  | 76662648  | A | G | 0.06 | -0.16 | 0.02 | 1.90E-11  |
| OPTC  | rs10750291  | 11 | 124836729 | A | G | 0.32 | -0.08 | 0.01 | 2.13E-10  |
| OPTC  | rs35320790  | 14 | 60642107  | A | C | 0.60 | -0.06 | 0.01 | 7.84E-07  |
| OPTC  | rs35731193  | 14 | 106050118 | A | G | 0.44 | -0.05 | 0.01 | 6.71E-06  |
| OPTC  | rs186021206 | 17 | 7166093   | A | G | 0.01 | 0.65  | 0.05 | 8.59E-18  |
| OSCAR | -           | 2  | 118955049 | G | A | 0.17 | 0.07  | 0.01 | 3.33E-07  |
| OSCAR | rs13063578  | 3  | 47046347  | A | T | 0.40 | -0.05 | 0.01 | 6.14E-06  |
| OSCAR | rs73401939  | 6  | 29772569  | G | A | 0.01 | 0.62  | 0.04 | 2.07E-21  |
| OSCAR | rs4407843   | 8  | 129597122 | C | A | 0.57 | -0.06 | 0.01 | 2.50E-09  |
| OSCAR | rs7137828   | 12 | 111494996 | T | C | 0.52 | -0.08 | 0.01 | 3.96E-17  |
| OSCAR | rs76428106  | 13 | 28029870  | C | T | 0.01 | 0.33  | 0.03 | 2.76E-13  |
| OSCAR | rs186021206 | 17 | 7166093   | A | G | 0.01 | 0.62  | 0.04 | 3.95E-20  |
| OSCAR | rs2305482   | 17 | 39984674  | C | A | 0.54 | -0.05 | 0.01 | 5.52E-06  |
| OSCAR | rs2659005   | 17 | 81244914  | T | C | 0.44 | 0.04  | 0.01 | 1.83E-05  |
| OSCAR | rs4442925   | 19 | 54051696  | T | C | 0.45 | 0.52  | 0.01 | 0.00E+00  |

|       |             |    |           |   |   |      |       |      |           |
|-------|-------------|----|-----------|---|---|------|-------|------|-----------|
| OSM   | rs28498283  | 2  | 43132926  | T | A | 0.26 | 0.07  | 0.01 | 7.82E-07  |
| OSM   | rs9325122   | 5  | 148823373 | T | C | 0.55 | -0.05 | 0.01 | 1.00E-05  |
| OSM   | -           | 6  | 31448099  | T | G | 0.30 | 0.07  | 0.01 | 1.06E-08  |
| OSM   | rs34433840  | 10 | 934476    | T | C | 0.24 | 0.06  | 0.01 | 5.32E-06  |
| OSM   | rs2511241   | 11 | 73234296  | T | C | 0.93 | 0.36  | 0.01 | 1.75E-61  |
| OSM   | rs7310615   | 12 | 111427245 | G | C | 0.52 | -0.07 | 0.01 | 6.54E-09  |
| OSM   | rs2289511   | 14 | 87988566  | A | G | 0.58 | -0.06 | 0.01 | 4.45E-07  |
| OSM   | rs11871747  | 17 | 40021029  | C | T | 0.39 | 0.13  | 0.01 | 7.52E-29  |
| OSM   | rs4823082   | 22 | 30204116  | C | G | 0.02 | -0.19 | 0.02 | 1.18E-06  |
| OSMR  | rs2228145   | 1  | 154454494 | C | A | 0.41 | -0.05 | 0.01 | 6.28E-07  |
| OSMR  | rs9292723   | 5  | 38852470  | T | C | 0.28 | -0.59 | 0.01 | 0.00E+00  |
| OSMR  | rs8176693   | 9  | 133262254 | T | C | 0.06 | 0.10  | 0.01 | 5.48E-07  |
| OSMR  | rs776516693 | 11 | 126371957 | T | G | 0.13 | -0.08 | 0.01 | 1.69E-08  |
| OSMR  | rs56187480  | 15 | 63497280  | A | G | 0.34 | 0.06  | 0.01 | 4.92E-10  |
| OSMR  | rs186021206 | 17 | 7166093   | A | G | 0.01 | 0.60  | 0.04 | 4.13E-19  |
| OXT   | rs10929757  | 2  | 11562535  | C | A | 0.58 | 0.06  | 0.01 | 2.38E-07  |
| OXT   | rs11127048  | 2  | 27529596  | A | G | 0.62 | -0.06 | 0.01 | 7.45E-07  |
| OXT   | rs4895864   | 6  | 130043337 | T | C | 0.57 | 0.05  | 0.01 | 2.85E-06  |
| OXT   | rs35332062  | 7  | 73597712  | A | G | 0.13 | -0.10 | 0.01 | 3.41E-10  |
| OXT   | rs45446698  | 7  | 99735325  | G | T | 0.04 | -0.12 | 0.02 | 5.51E-06  |
| OXT   | rs112875651 | 8  | 125494452 | A | G | 0.39 | -0.07 | 0.01 | 1.89E-09  |
| OXT   | rs2068888   | 10 | 93079885  | A | G | 0.45 | -0.05 | 0.01 | 1.07E-05  |
| OXT   | rs4782568   | 16 | 83946924  | G | C | 0.45 | 0.06  | 0.01 | 2.78E-07  |
| OXT   | rs877172    | 20 | 3069244   | G | T | 0.31 | 0.62  | 0.01 | 0.00E+00  |
| OXT   | rs1800961   | 20 | 44413724  | T | C | 0.03 | -0.14 | 0.02 | 1.13E-05  |
| P4HB  | rs3910516   | 2  | 215438330 | G | A | 0.74 | 0.07  | 0.01 | 7.39E-07  |
| P4HB  | rs1354034   | 3  | 56815721  | C | T | 0.60 | 0.06  | 0.01 | 7.77E-07  |
| P4HB  | -           | 7  | 106727342 | C | T | 0.46 | -0.05 | 0.01 | 6.50E-06  |
| P4HB  | rs112635299 | 14 | 94371805  | T | G | 0.02 | 0.19  | 0.03 | 1.55E-06  |
| P4HB  | rs113708033 | 17 | 81878054  | T | G | 0.19 | 0.08  | 0.01 | 1.45E-08  |
| PADI2 | rs2235913   | 1  | 17098582  | A | G | 0.62 | 0.12  | 0.01 | 3.02E-25  |
| PADI4 | rs2240336   | 1  | 17347907  | T | C | 0.41 | -0.26 | 0.01 | 2.32E-110 |
| PAEP  | rs1130866   | 2  | 85666618  | A | G | 0.51 | -0.04 | 0.01 | 2.72E-05  |
| PAEP  | rs9409964   | 9  | 135580082 | A | G | 0.19 | 0.87  | 0.01 | 0.00E+00  |
| PAEP  | rs4805162   | 19 | 36183403  | G | A | 0.52 | -0.05 | 0.01 | 1.16E-08  |
| PAG1  | rs1354034   | 3  | 56815721  | C | T | 0.60 | 0.05  | 0.01 | 8.06E-06  |
| PAG1  | rs4436084   | 8  | 81125771  | C | T | 0.35 | -0.08 | 0.01 | 6.80E-10  |
| PAG1  | rs7310615   | 12 | 111427245 | G | C | 0.52 | -0.08 | 0.01 | 4.65E-11  |
| PAG1  | rs1532085   | 15 | 58391167  | G | A | 0.62 | 0.06  | 0.01 | 1.09E-06  |
| PAG1  | rs247617    | 16 | 56956804  | A | C | 0.32 | -0.08 | 0.01 | 1.85E-10  |
| PAG1  | rs7208422   | 17 | 78134494  | T | A | 0.48 | -0.08 | 0.01 | 5.82E-11  |
| PAK4  | rs1354034   | 3  | 56815721  | C | T | 0.60 | 0.05  | 0.01 | 1.82E-05  |
| PAK4  | rs60822569  | 12 | 54323724  | C | T | 0.55 | 0.06  | 0.01 | 2.55E-06  |
| PAM   | rs149802978 | 5  | 103011162 | G | C | 0.05 | -1.09 | 0.02 | 0.00E+00  |
| PAM   | rs75901433  | 6  | 32531373  | G | A | 0.56 | 0.05  | 0.01 | 6.83E-07  |
| PAM   | rs56278466  | 10 | 17833858  | G | T | 0.66 | 0.11  | 0.01 | 2.17E-24  |
| PAM   | rs10509313  | 10 | 69512378  | G | A | 0.17 | 0.06  | 0.01 | 1.13E-05  |
| PAM   | rs12975366  | 19 | 54255498  | C | T | 0.40 | -0.07 | 0.01 | 2.01E-11  |
| PAMR1 | rs1260326   | 2  | 27508073  | C | T | 0.61 | -0.06 | 0.01 | 5.01E-08  |
| PAMR1 | rs1150753   | 6  | 32092090  | G | A | 0.13 | -0.22 | 0.01 | 4.14E-47  |
| PAMR1 | rs61736408  | 11 | 35434513  | C | T | 0.16 | -0.47 | 0.01 | 2.12E-220 |
| PAMR1 | rs4055121   | 11 | 126362442 | T | C | 0.14 | -0.07 | 0.01 | 1.84E-05  |
| PAPPA | rs967968    | 2  | 61428921  | G | C | 0.51 | 0.08  | 0.01 | 8.73E-12  |
| PAPPA | rs34263006  | 2  | 102734543 | A | C | 0.22 | -0.06 | 0.01 | 6.93E-06  |
| PAPPA | rs4328821   | 3  | 128597592 | G | A | 0.11 | -0.12 | 0.01 | 1.72E-11  |
| PAPPA | rs13107325  | 4  | 102267552 | T | C | 0.07 | 0.10  | 0.01 | 9.84E-07  |

|        |             |    |           |   |   |      |       |      |           |
|--------|-------------|----|-----------|---|---|------|-------|------|-----------|
| PAPPA  | rs7808353   | 7  | 2407045   | T | A | 0.17 | -0.08 | 0.01 | 4.63E-08  |
| PAPPA  | rs117448041 | 9  | 115580321 | C | T | 0.02 | 0.18  | 0.03 | 1.89E-05  |
| PAPPA  | rs9704782   | 11 | 46682556  | T | G | 0.26 | -0.06 | 0.01 | 1.41E-05  |
| PAPPA  | rs147496186 | 11 | 49333270  | C | G | 0.04 | -0.12 | 0.02 | 1.79E-05  |
| PAPPA  | rs550729    | 11 | 57391903  | C | T | 0.73 | 0.26  | 0.01 | 8.55E-98  |
| PAPPA  | rs56056911  | 15 | 101243641 | C | G | 0.14 | -0.07 | 0.01 | 6.20E-06  |
| PAPPA  | rs74035509  | 16 | 88500925  | T | C | 0.08 | 0.11  | 0.01 | 2.82E-07  |
| PAPPA  | rs35617692  | 17 | 58195140  | A | C | 0.01 | 0.29  | 0.03 | 5.14E-08  |
| PARK7  | rs3766606   | 1  | 7962137   | T | G | 0.17 | 0.21  | 0.01 | 1.80E-44  |
| PARK7  | rs1354034   | 3  | 56815721  | C | T | 0.60 | 0.06  | 0.01 | 3.29E-07  |
| PARK7  | rs6993770   | 8  | 105569300 | T | A | 0.29 | -0.05 | 0.01 | 1.72E-05  |
| PARK7  | rs10733789  | 10 | 63188924  | C | T | 0.31 | 0.05  | 0.01 | 2.30E-05  |
| PARK7  | rs11170874  | 12 | 54332691  | G | A | 0.33 | 0.05  | 0.01 | 1.07E-05  |
| PARP1  | rs1433574   | 1  | 226421638 | C | A | 0.16 | -0.16 | 0.01 | 9.77E-25  |
| PARP1  | rs4632248   | 19 | 53821741  | T | G | 0.21 | 0.15  | 0.01 | 1.50E-27  |
| PBLD   | rs61854835  | 10 | 68279137  | G | A | 0.24 | 0.57  | 0.01 | 0.00E+00  |
| PCDH1  | rs4645358   | 5  | 141880520 | T | C | 0.57 | 0.08  | 0.01 | 2.92E-13  |
| PCDH1  | rs4077811   | 9  | 93078062  | G | A | 0.14 | 0.07  | 0.01 | 9.83E-06  |
| PCDH1  | rs587611953 | 9  | 133270004 | A | C | 0.16 | 0.17  | 0.01 | 1.62E-23  |
| PCDH1  | rs56278466  | 10 | 17833858  | G | T | 0.66 | 0.05  | 0.01 | 6.02E-06  |
| PCDH1  | -           | 10 | 80523403  | A | T | 0.73 | 0.06  | 0.01 | 9.76E-06  |
| PCDH1  | rs34937091  | 12 | 50652945  | T | G | 0.36 | 0.06  | 0.01 | 1.98E-06  |
| PCDH1  | rs58534292  | 14 | 21737747  | C | T | 0.65 | -0.12 | 0.01 | 7.00E-26  |
| PCDH1  | rs60808632  | 14 | 106001848 | A | C | 0.63 | -0.13 | 0.01 | 1.07E-27  |
| PCDH1  | rs77542162  | 17 | 69085137  | G | A | 0.02 | 0.17  | 0.02 | 6.77E-06  |
| PCDH17 | rs6789547   | 3  | 58440320  | T | C | 0.17 | -0.07 | 0.01 | 5.49E-06  |
| PCDH17 | rs71536553  | 6  | 32560520  | G | A | 0.22 | 0.07  | 0.01 | 5.13E-07  |
| PCDH17 | rs8176749   | 9  | 133255801 | T | C | 0.06 | 0.64  | 0.01 | 5.68E-184 |
| PCDH17 | rs56278466  | 10 | 17833858  | G | T | 0.66 | 0.11  | 0.01 | 1.39E-23  |
| PCDH17 | rs11603123  | 11 | 126435600 | A | G | 0.03 | 0.17  | 0.02 | 1.06E-08  |
| PCDH17 | rs3184504   | 12 | 111446804 | C | T | 0.52 | -0.08 | 0.01 | 1.67E-14  |
| PCDH17 | rs11148472  | 13 | 59446055  | C | A | 0.39 | 0.35  | 0.01 | 1.17E-211 |
| PCDH17 | rs186021206 | 17 | 7166093   | A | G | 0.01 | 0.35  | 0.05 | 1.94E-06  |
| PCDH17 | rs5757683   | 22 | 39454169  | A | G | 0.75 | -0.07 | 0.01 | 5.22E-09  |
| PCOLCE | rs9801017   | 7  | 100638579 | A | G | 0.62 | 0.17  | 0.01 | 8.56E-21  |
| PCSK9  | rs11591147  | 1  | 55039974  | T | G | 0.02 | -1.14 | 0.03 | 6.08E-165 |
| PCSK9  | rs547186    | 2  | 21046369  | A | T | 0.50 | 0.07  | 0.01 | 1.90E-11  |
| PCSK9  | rs1260326   | 2  | 27508073  | C | T | 0.61 | -0.07 | 0.01 | 7.25E-11  |
| PCSK9  | rs2001945   | 8  | 125465736 | C | G | 0.52 | -0.06 | 0.01 | 1.56E-07  |
| PCSK9  | rs35473591  | 11 | 61818856  | T | C | 0.34 | 0.08  | 0.01 | 1.27E-11  |
| PCSK9  | rs673335    | 11 | 75739531  | C | T | 0.16 | -0.07 | 0.01 | 1.22E-05  |
| PCSK9  | rs261342    | 15 | 58438954  | C | G | 0.78 | -0.06 | 0.01 | 1.49E-06  |
| PCSK9  | rs8106503   | 19 | 11086210  | C | T | 0.12 | -0.10 | 0.01 | 1.12E-08  |
| PCSK9  | rs58542926  | 19 | 19268740  | T | C | 0.08 | -0.13 | 0.01 | 1.24E-09  |
| PDCD1  | rs37471     | 1  | 43811876  | T | C | 0.35 | 0.07  | 0.01 | 1.18E-09  |
| PDCD1  | rs2476601   | 1  | 113834946 | G | A | 0.90 | -0.09 | 0.01 | 3.80E-06  |
| PDCD1  | rs376812565 | 2  | 122138    | T | C | 0.64 | -0.06 | 0.01 | 6.95E-06  |
| PDCD1  | rs11888817  | 2  | 62303845  | C | T | 0.64 | 0.05  | 0.01 | 8.90E-06  |
| PDCD1  | rs3087243   | 2  | 203874196 | A | G | 0.45 | -0.06 | 0.01 | 3.79E-07  |
| PDCD1  | -           | 2  | 241859600 | C | G | 0.20 | -0.30 | 0.01 | 1.14E-101 |
| PDCD1  | rs9838308   | 3  | 170033504 | C | T | 0.37 | -0.05 | 0.01 | 8.25E-06  |
| PDCD1  | rs3128981   | 6  | 31437843  | G | A | 0.30 | 0.06  | 0.01 | 1.51E-06  |
| PDCD1  | rs80318131  | 7  | 129143002 | C | T | 0.31 | 0.06  | 0.01 | 1.28E-05  |
| PDCD1  | rs12772559  | 10 | 69424600  | C | G | 0.26 | 0.08  | 0.01 | 7.03E-11  |
| PDCD1  | rs111338191 | 12 | 111388673 | T | A | 0.52 | -0.10 | 0.01 | 3.79E-19  |
| PDCD1  | rs11460034  | 12 | 120807949 | T | A | 0.53 | -0.05 | 0.01 | 2.46E-05  |

|          |             |    |           |   |   |      |       |      |           |
|----------|-------------|----|-----------|---|---|------|-------|------|-----------|
| PDCD1    | rs7161799   | 15 | 58478324  | T | C | 0.08 | 0.13  | 0.01 | 1.99E-09  |
| PDCD1    | rs186021206 | 17 | 7166093   | A | G | 0.01 | 0.60  | 0.05 | 1.99E-15  |
| PDCD1    | rs28394864  | 17 | 49373413  | A | G | 0.46 | -0.05 | 0.01 | 2.11E-05  |
| PDCD1    | rs2659005   | 17 | 81244914  | T | C | 0.44 | 0.06  | 0.01 | 5.34E-08  |
| PDCD1    | rs753324368 | 19 | 10631005  | A | C | 0.74 | -0.08 | 0.01 | 1.44E-09  |
| PDCD1LG2 | rs812490    | 1  | 43805985  | C | T | 0.45 | -0.06 | 0.01 | 5.49E-09  |
| PDCD1LG2 | rs10935473  | 3  | 98698056  | T | G | 0.44 | -0.46 | 0.01 | 0.00E+00  |
| PDCD1LG2 | rs2070725   | 5  | 132486096 | T | C | 0.34 | -0.05 | 0.01 | 4.69E-06  |
| PDCD1LG2 | rs2381282   | 9  | 5514839   | C | T | 0.44 | 0.60  | 0.01 | 0.00E+00  |
| PDCD1LG2 | rs507666    | 9  | 133273983 | A | G | 0.18 | -0.20 | 0.01 | 5.95E-46  |
| PDCD1LG2 | rs4055121   | 11 | 126362442 | T | C | 0.13 | -0.08 | 0.01 | 5.44E-09  |
| PDCD1LG2 | rs3184504   | 12 | 111446804 | C | T | 0.52 | -0.05 | 0.01 | 9.16E-09  |
| PDCD1LG2 | rs186021206 | 17 | 7166093   | A | G | 0.01 | 0.96  | 0.04 | 3.21E-50  |
| PDCD5    | rs1354034   | 3  | 56815721  | C | T | 0.60 | 0.07  | 0.01 | 3.70E-09  |
| PDCD5    | rs60822569  | 12 | 54323724  | C | T | 0.55 | 0.05  | 0.01 | 6.35E-06  |
| PDCD5    | rs10402931  | 19 | 32581163  | A | G | 0.68 | 0.38  | 0.01 | 6.53E-217 |
| PDCD6    | rs676705    | 1  | 56918624  | A | G | 0.35 | -0.06 | 0.01 | 9.34E-11  |
| PDCD6    | rs9654451   | 5  | 299428    | T | C | 0.13 | -1.48 | 0.01 | 0.00E+00  |
| PDCD6    | rs9495061   | 6  | 138380781 | A | C | 0.06 | -0.08 | 0.01 | 2.60E-06  |
| PDCD6    | -           | 10 | 63399012  | A | G | 0.47 | 0.04  | 0.01 | 1.13E-06  |
| PDCD6    | rs10842898  | 12 | 9109693   | T | G | 0.35 | -0.05 | 0.01 | 3.35E-10  |
| PDCD6    | rs112635299 | 14 | 94371805  | T | G | 0.02 | 0.15  | 0.02 | 8.32E-08  |
| PDGFA    | rs6671171   | 1  | 156901526 | A | G | 0.11 | 0.08  | 0.01 | 6.39E-06  |
| PDGFA    | rs3811444   | 1  | 247876149 | T | C | 0.33 | -0.07 | 0.01 | 2.50E-09  |
| PDGFA    | rs7618405   | 3  | 18209017  | A | C | 0.21 | -0.07 | 0.01 | 5.72E-06  |
| PDGFA    | rs1354034   | 3  | 56815721  | C | T | 0.60 | -0.12 | 0.01 | 7.21E-26  |
| PDGFA    | rs2278668   | 3  | 123116385 | C | T | 0.59 | -0.06 | 0.01 | 2.91E-06  |
| PDGFA    | rs4698839   | 4  | 101880784 | T | C | 0.40 | -0.07 | 0.01 | 4.58E-09  |
| PDGFA    | rs10058074  | 5  | 132350453 | A | G | 0.48 | -0.05 | 0.01 | 4.42E-06  |
| PDGFA    | rs2105957   | 6  | 31453863  | G | C | 0.08 | -0.11 | 0.01 | 2.06E-07  |
| PDGFA    | rs146842698 | 6  | 70618570  | A | T | 0.31 | -0.06 | 0.01 | 6.33E-06  |
| PDGFA    | rs2759391   | 6  | 163443194 | C | A | 0.34 | -0.05 | 0.01 | 1.16E-05  |
| PDGFA    | rs147247048 | 7  | 592365    | T | C | 0.00 | -0.44 | 0.07 | 2.20E-05  |
| PDGFA    | rs6961069   | 7  | 80589645  | T | C | 0.40 | 0.07  | 0.01 | 4.17E-09  |
| PDGFA    | rs6993770   | 8  | 105569300 | T | A | 0.29 | -0.18 | 0.01 | 1.56E-47  |
| PDGFA    | rs9787438   | 10 | 63278270  | C | G | 0.41 | 0.12  | 0.01 | 1.01E-24  |
| PDGFA    | rs34377578  | 10 | 102576669 | C | A | 0.25 | 0.08  | 0.01 | 5.52E-10  |
| PDGFA    | rs5796220   | 12 | 6184174   | T | C | 0.49 | -0.05 | 0.01 | 9.99E-06  |
| PDGFA    | rs59001897  | 15 | 64868193  | A | T | 0.17 | 0.08  | 0.01 | 1.64E-07  |
| PDGFA    | rs12445050  | 16 | 81837364  | T | C | 0.14 | 0.11  | 0.01 | 5.73E-12  |
| PDGFA    | rs1654425   | 19 | 55027612  | C | T | 0.83 | 0.17  | 0.01 | 1.62E-29  |
| PDGFA    | rs3827978   | 20 | 19300647  | T | C | 0.35 | 0.07  | 0.01 | 3.95E-10  |
| PDGFB    | rs75699653  | 1  | 156902203 | T | C | 0.02 | 0.16  | 0.02 | 2.03E-05  |
| PDGFB    | rs68066031  | 2  | 224015781 | C | T | 0.23 | 0.23  | 0.01 | 3.42E-64  |
| PDGFB    | rs1354034   | 3  | 56815721  | C | T | 0.60 | -0.07 | 0.01 | 9.92E-11  |
| PDGFB    | rs755492124 | 4  | 101856385 | T | G | 0.39 | -0.06 | 0.01 | 3.10E-08  |
| PDGFB    | rs274555    | 5  | 132387259 | T | C | 0.40 | 0.05  | 0.01 | 1.75E-05  |
| PDGFB    | rs2516471   | 6  | 31432515  | A | G | 0.06 | -0.12 | 0.02 | 1.09E-06  |
| PDGFB    | rs1917342   | 6  | 70640051  | G | A | 0.30 | -0.06 | 0.01 | 3.14E-06  |
| PDGFB    | rs6961069   | 7  | 80589645  | T | C | 0.40 | 0.07  | 0.01 | 1.40E-08  |
| PDGFB    | rs6993770   | 8  | 105569300 | T | A | 0.29 | -0.14 | 0.01 | 6.44E-30  |
| PDGFB    | rs10820606  | 9  | 96430637  | C | A | 0.23 | -0.08 | 0.01 | 4.52E-08  |
| PDGFB    | rs61469632  | 9  | 132986603 | C | T | 0.06 | -0.10 | 0.02 | 1.72E-05  |
| PDGFB    | rs10740118  | 10 | 63341447  | C | G | 0.41 | 0.10  | 0.01 | 1.66E-19  |
| PDGFB    | rs34377578  | 10 | 102576669 | C | A | 0.25 | 0.08  | 0.01 | 6.70E-10  |
| PDGFB    | rs1362213   | 12 | 6173262   | T | C | 0.48 | -0.05 | 0.01 | 4.05E-06  |

|        |             |    |           |   |   |      |       |      |           |
|--------|-------------|----|-----------|---|---|------|-------|------|-----------|
| PDGFB  | rs60128101  | 15 | 64868190  | A | T | 0.17 | 0.07  | 0.01 | 3.30E-06  |
| PDGFB  | rs11639051  | 15 | 101452793 | A | C | 0.30 | 0.09  | 0.01 | 2.62E-13  |
| PDGFB  | rs12445050  | 16 | 81837364  | T | C | 0.14 | 0.10  | 0.01 | 2.10E-10  |
| PDGFB  | rs1654425   | 19 | 55027612  | C | T | 0.83 | 0.17  | 0.01 | 6.48E-28  |
| PDGFB  | rs3827978   | 20 | 19300647  | T | C | 0.35 | 0.08  | 0.01 | 1.05E-10  |
| PDGFC  | rs12499706  | 4  | 156174698 | G | C | 0.27 | -0.09 | 0.01 | 8.48E-13  |
| PDGFC  | rs4861708   | 4  | 186236079 | A | G | 0.51 | -0.09 | 0.01 | 1.82E-13  |
| PDGFC  | rs75077631  | 5  | 177413083 | C | G | 0.74 | -0.06 | 0.01 | 1.35E-05  |
| PDGFC  | rs150611042 | 9  | 114321523 | A | C | 0.07 | -0.47 | 0.02 | 2.04E-92  |
| PDGFC  | rs28929474  | 14 | 94378610  | T | C | 0.02 | 0.35  | 0.03 | 2.37E-17  |
| PDGFC  | rs149394327 | 17 | 66232877  | C | G | 0.03 | 0.36  | 0.02 | 2.52E-25  |
| PDGFC  | rs1065853   | 19 | 44909976  | T | G | 0.08 | 0.18  | 0.01 | 8.84E-18  |
| PDGFRA | rs61801010  | 1  | 161572445 | G | A | 0.11 | 0.15  | 0.01 | 3.21E-15  |
| PDGFRA | rs56033718  | 3  | 58460671  | G | A | 0.37 | 0.08  | 0.01 | 2.03E-12  |
| PDGFRA | rs4558798   | 3  | 98590071  | G | A | 0.67 | -0.05 | 0.01 | 1.59E-05  |
| PDGFRA | rs35597368  | 4  | 54273604  | C | T | 0.11 | -0.42 | 0.01 | 2.29E-126 |
| PDGFRA | rs9267947   | 6  | 32243441  | G | A | 0.48 | 0.05  | 0.01 | 1.29E-06  |
| PDGFRA | rs142032527 | 7  | 150521013 | T | A | 0.24 | -0.06 | 0.01 | 1.91E-05  |
| PDGFRA | rs10761753  | 10 | 63402143  | A | G | 0.47 | 0.05  | 0.01 | 7.08E-06  |
| PDGFRA | rs3751198   | 12 | 103753429 | G | A | 0.60 | 0.12  | 0.01 | 1.33E-27  |
| PDGFRA | rs12148472  | 15 | 78939136  | C | T | 0.13 | 0.07  | 0.01 | 1.26E-05  |
| PDGFRA | rs186021206 | 17 | 7166093   | A | G | 0.01 | 0.33  | 0.05 | 1.41E-05  |
| PDGFRA | rs62217923  | 21 | 41167366  | G | C | 0.26 | 0.05  | 0.01 | 2.24E-05  |
| PDGFRA | rs2294915   | 22 | 43945024  | T | C | 0.23 | 0.06  | 0.01 | 1.44E-06  |
| PDGFRB | rs2304058   | 5  | 150128981 | G | C | 0.56 | 1.17  | 0.01 | 0.00E+00  |
| PDGFRB | rs68055275  | 11 | 126369248 | T | C | 0.14 | -0.07 | 0.01 | 4.61E-10  |
| PDGFRB | rs186021206 | 17 | 7166093   | A | G | 0.01 | 0.42  | 0.03 | 1.42E-16  |
| PDLIM7 | rs1354034   | 3  | 56815721  | C | T | 0.60 | 0.05  | 0.01 | 5.17E-06  |
| PDLIM7 | rs342298    | 7  | 106733200 | T | C | 0.45 | -0.08 | 0.01 | 8.09E-12  |
| PDLIM7 | rs11553699  | 12 | 121779004 | G | A | 0.14 | -0.08 | 0.01 | 1.88E-06  |
| PEAR1  | rs4661012   | 1  | 156915699 | G | T | 0.36 | -0.21 | 0.01 | 3.10E-72  |
| PEAR1  | rs1354034   | 3  | 56815721  | C | T | 0.60 | -0.06 | 0.01 | 3.35E-08  |
| PEAR1  | rs13107325  | 4  | 102267552 | T | C | 0.08 | 0.16  | 0.01 | 7.44E-15  |
| PEAR1  | rs56293029  | 6  | 135097901 | A | C | 0.26 | 0.06  | 0.01 | 4.97E-06  |
| PEAR1  | rs296847    | 9  | 4793798   | T | G | 0.66 | 0.06  | 0.01 | 5.46E-07  |
| PEAR1  | rs8176741   | 9  | 133256074 | A | G | 0.06 | 0.43  | 0.02 | 7.20E-78  |
| PEAR1  | -           | 11 | 119269246 | C | T | 0.31 | 0.05  | 0.01 | 1.46E-05  |
| PEAR1  | rs3967200   | 11 | 126362490 | T | C | 0.13 | -0.08 | 0.01 | 3.53E-06  |
| PEAR1  | rs370664797 | 12 | 89431434  | C | T | 0.25 | -0.06 | 0.01 | 8.32E-06  |
| PEAR1  | rs3184504   | 12 | 111446804 | C | T | 0.52 | -0.08 | 0.01 | 4.76E-12  |
| PEAR1  | rs186021206 | 17 | 7166093   | A | G | 0.01 | 0.74  | 0.05 | 1.59E-22  |
| PEBP1  | rs1354034   | 3  | 56815721  | C | T | 0.60 | 0.06  | 0.01 | 2.25E-07  |
| PEBP1  | rs10733789  | 10 | 63188924  | C | T | 0.31 | 0.05  | 0.01 | 1.93E-05  |
| PEBP1  | -           | 12 | 118261874 | G | C | 0.01 | -0.48 | 0.04 | 1.21E-17  |
| PECAM1 | rs1354034   | 3  | 56815721  | C | T | 0.60 | 0.07  | 0.01 | 1.38E-11  |
| PECAM1 | rs10075801  | 5  | 132341949 | G | A | 0.49 | -0.05 | 0.01 | 8.15E-06  |
| PECAM1 | rs342293    | 7  | 106731773 | G | C | 0.46 | -0.06 | 0.01 | 2.46E-08  |
| PECAM1 | rs6993770   | 8  | 105569300 | T | A | 0.29 | -0.05 | 0.01 | 1.96E-05  |
| PECAM1 | rs2519093   | 9  | 133266456 | T | C | 0.18 | -0.58 | 0.01 | 0.00E+00  |
| PECAM1 | rs35166255  | 11 | 126431861 | A | G | 0.03 | 0.33  | 0.02 | 3.53E-28  |
| PECAM1 | rs3184504   | 12 | 111446804 | C | T | 0.52 | -0.06 | 0.01 | 4.73E-07  |
| PECAM1 | rs186021206 | 17 | 7166093   | A | G | 0.01 | 0.61  | 0.05 | 1.54E-16  |
| PFKFB2 | rs1560      | 1  | 207077286 | G | A | 0.48 | -0.19 | 0.01 | 4.37E-63  |
| PFKFB2 | rs1354034   | 3  | 56815721  | C | T | 0.60 | 0.06  | 0.01 | 2.62E-07  |
| PFKFB2 | rs6993770   | 8  | 105569300 | T | A | 0.29 | -0.06 | 0.01 | 2.71E-06  |
| PFKFB2 | rs7080386   | 10 | 63288546  | A | C | 0.41 | 0.06  | 0.01 | 1.82E-06  |

|          |             |    |           |   |   |      |       |      |           |
|----------|-------------|----|-----------|---|---|------|-------|------|-----------|
| PGF      | rs9319430   | 13 | 28402948  | A | T | 0.53 | 0.08  | 0.01 | 1.00E-15  |
| PGF      | rs4902651   | 14 | 68805408  | T | C | 0.50 | -0.05 | 0.01 | 1.06E-05  |
| PGF      | -           | 14 | 75029984  | C | A | 0.47 | 0.15  | 0.01 | 1.25E-50  |
| PGF      | rs704       | 17 | 28367840  | A | G | 0.47 | -0.05 | 0.01 | 2.74E-06  |
| PGLYRP1  | rs3917932   | 1  | 36478315  | G | C | 0.58 | -0.07 | 0.01 | 1.34E-09  |
| PGLYRP1  | rs113542380 | 2  | 43237679  | A | G | 0.07 | 0.14  | 0.01 | 3.46E-11  |
| PGLYRP1  | rs6436124   | 2  | 219176711 | A | C | 0.61 | 0.09  | 0.01 | 1.04E-13  |
| PGLYRP1  | rs2290547   | 3  | 47019693  | A | G | 0.18 | 0.06  | 0.01 | 1.65E-05  |
| PGLYRP1  | rs41266485  | 3  | 127671682 | T | C | 0.21 | 0.08  | 0.01 | 1.39E-08  |
| PGLYRP1  | rs218264    | 4  | 54542708  | T | A | 0.25 | 0.07  | 0.01 | 1.57E-07  |
| PGLYRP1  | rs141484466 | 6  | 31356775  | C | G | 0.04 | 0.31  | 0.02 | 1.10E-26  |
| PGLYRP1  | rs11775560  | 8  | 60747604  | G | A | 0.19 | 0.13  | 0.01 | 4.40E-21  |
| PGLYRP1  | rs4407843   | 8  | 129597122 | C | A | 0.57 | -0.05 | 0.01 | 6.48E-06  |
| PGLYRP1  | rs2074038   | 11 | 44066439  | T | G | 0.10 | 0.12  | 0.01 | 2.44E-10  |
| PGLYRP1  | rs2511241   | 11 | 73234296  | T | C | 0.93 | 0.10  | 0.01 | 2.53E-06  |
| PGLYRP1  | rs371147134 | 12 | 31836996  | A | G | 0.52 | -0.06 | 0.01 | 3.20E-07  |
| PGLYRP1  | rs7310615   | 12 | 111427245 | G | C | 0.52 | -0.05 | 0.01 | 1.71E-05  |
| PGLYRP1  | -           | 17 | 39988115  | T | A | 0.54 | -0.12 | 0.01 | 1.25E-28  |
| PGLYRP1  | -           | 19 | 4970712   | A | G | 0.23 | -0.08 | 0.01 | 1.92E-09  |
| PGLYRP1  | rs2072563   | 19 | 46023390  | A | G | 0.33 | -0.30 | 0.01 | 2.49E-136 |
| PHOSPHO1 | rs543343625 | 16 | 66956668  | T | C | 0.00 | -1.83 | 0.14 | 3.48E-18  |
| PI3      | rs11679052  | 2  | 72029274  | C | G | 0.44 | -0.06 | 0.01 | 5.94E-08  |
| PI3      | rs28550378  | 8  | 125596398 | T | C | 0.47 | 0.05  | 0.01 | 3.68E-06  |
| PI3      | rs7088444   | 10 | 79009948  | T | C | 0.48 | 0.06  | 0.01 | 8.25E-08  |
| PI3      | rs17333180  | 20 | 45175067  | A | C | 0.18 | 0.35  | 0.01 | 3.51E-138 |
| PIGR     | rs291102    | 1  | 206933133 | A | G | 0.02 | -0.51 | 0.02 | 1.03E-43  |
| PIGR     | rs1200427   | 6  | 45558733  | T | A | 0.25 | 0.08  | 0.01 | 1.82E-09  |
| PIGR     | rs113810201 | 7  | 151229168 | G | A | 0.11 | 0.10  | 0.01 | 1.74E-08  |
| PIGR     | -           | 9  | 133255468 | T | G | 0.06 | 0.14  | 0.02 | 3.78E-09  |
| PIGR     | rs61882275  | 11 | 34482745  | A | G | 0.38 | -0.06 | 0.01 | 2.49E-06  |
| PIGR     | rs708686    | 19 | 5840608   | T | C | 0.27 | 0.10  | 0.01 | 1.93E-15  |
| PIGR     | rs838136    | 19 | 48753131  | C | T | 0.28 | -0.06 | 0.01 | 2.36E-05  |
| PIK3AP1  | rs11204523  | 1  | 247857254 | C | G | 0.76 | -0.08 | 0.01 | 3.18E-09  |
| PIK3AP1  | rs1354034   | 3  | 56815721  | C | T | 0.60 | 0.10  | 0.01 | 4.50E-20  |
| PIK3AP1  | rs7695151   | 4  | 2770803   | T | C | 0.46 | -0.05 | 0.01 | 1.29E-06  |
| PIK3AP1  | rs9264942   | 6  | 31306603  | C | T | 0.35 | 0.05  | 0.01 | 2.01E-05  |
| PIK3AP1  | rs78842280  | 6  | 47513892  | G | T | 0.27 | -0.06 | 0.01 | 1.31E-06  |
| PIK3AP1  | rs342293    | 7  | 106731773 | G | C | 0.46 | -0.05 | 0.01 | 4.32E-06  |
| PIK3AP1  | rs530506    | 9  | 133006062 | A | G | 0.55 | 0.05  | 0.01 | 2.19E-05  |
| PIK3AP1  | rs41317268  | 10 | 96709357  | G | A | 0.19 | -0.23 | 0.01 | 3.89E-59  |
| PIK3IP1  | rs13146355  | 4  | 76490987  | A | G | 0.46 | 0.05  | 0.01 | 9.85E-06  |
| PIK3IP1  | rs28640218  | 16 | 20347945  | T | G | 0.19 | -0.08 | 0.01 | 3.74E-08  |
| PIK3IP1  | rs2413028   | 22 | 31145921  | C | T | 0.17 | -0.37 | 0.01 | 4.80E-147 |
| PILRA    | rs61747728  | 1  | 179557079 | T | C | 0.04 | 0.10  | 0.01 | 1.76E-05  |
| PILRA    | rs10085857  | 7  | 45216839  | T | C | 0.48 | 0.19  | 0.01 | 4.68E-58  |
| PILRA    | rs1859788   | 7  | 100374211 | G | A | 0.68 | 0.99  | 0.01 | 0.00E+00  |
| PILRA    | rs3184504   | 12 | 111446804 | C | T | 0.52 | -0.06 | 0.01 | 4.70E-13  |
| PILRA    | rs186021206 | 17 | 7166093   | A | G | 0.01 | 0.55  | 0.04 | 2.84E-20  |
| PILRA    | rs55951667  | 17 | 76598422  | T | C | 0.37 | -0.04 | 0.01 | 1.51E-05  |
| PILRA    | rs8077394   | 17 | 81284987  | G | A | 0.55 | -0.05 | 0.01 | 1.01E-08  |
| PILRB    | rs10085857  | 7  | 45216839  | T | C | 0.48 | 0.22  | 0.01 | 1.58E-73  |
| PILRB    | rs1859788   | 7  | 100374211 | G | A | 0.68 | 1.14  | 0.01 | 0.00E+00  |
| PILRB    | rs7310615   | 12 | 111427245 | G | C | 0.52 | -0.06 | 0.01 | 1.02E-12  |
| PILRB    | rs186021206 | 17 | 7166093   | A | G | 0.01 | 0.47  | 0.03 | 4.01E-18  |
| PILRB    | rs8077394   | 17 | 81284987  | G | A | 0.55 | -0.05 | 0.01 | 1.01E-08  |
| PKLR     | rs77350683  | 1  | 155514639 | C | T | 0.07 | -0.36 | 0.01 | 1.36E-58  |

|         |             |    |           |   |   |      |       |      |           |
|---------|-------------|----|-----------|---|---|------|-------|------|-----------|
| PKLR    | rs6592965   | 7  | 50360284  | A | G | 0.45 | 0.06  | 0.01 | 7.17E-08  |
| PKLR    | rs2361710   | 17 | 80138078  | C | T | 0.47 | -0.05 | 0.01 | 5.18E-06  |
| PKLR    | rs737092    | 20 | 57415349  | C | T | 0.49 | 0.05  | 0.01 | 9.16E-06  |
| PLA2G10 | rs12136083  | 1  | 62697402  | C | T | 0.35 | 0.06  | 0.01 | 6.07E-07  |
| PLA2G10 | rs533617    | 2  | 21011100  | C | T | 0.04 | 0.13  | 0.02 | 4.48E-06  |
| PLA2G10 | rs1260326   | 2  | 27508073  | C | T | 0.61 | 0.05  | 0.01 | 3.53E-06  |
| PLA2G10 | rs149401529 | 3  | 52513395  | C | G | 0.01 | -0.48 | 0.05 | 2.66E-11  |
| PLA2G10 | rs28367569  | 6  | 31268325  | C | T | 0.04 | 0.58  | 0.02 | 1.11E-106 |
| PLA2G10 | rs75278536  | 8  | 19963914  | G | T | 0.11 | 0.10  | 0.01 | 8.80E-09  |
| PLA2G10 | rs2976388   | 8  | 142678838 | A | G | 0.42 | -0.26 | 0.01 | 3.17E-122 |
| PLA2G10 | -           | 9  | 133274293 | A | C | 0.18 | -0.11 | 0.01 | 1.34E-15  |
| PLA2G10 | rs34481144  | 11 | 320836    | T | C | 0.50 | -0.11 | 0.01 | 2.17E-23  |
| PLA2G10 | rs7232      | 11 | 60173126  | A | T | 0.37 | 0.07  | 0.01 | 6.35E-10  |
| PLA2G10 | rs964184    | 11 | 116778201 | C | G | 0.87 | 0.11  | 0.01 | 9.35E-13  |
| PLA2G10 | rs536340612 | 16 | 14564263  | C | T | 0.00 | -1.42 | 0.06 | 1.91E-60  |
| PLA2G10 | rs186021206 | 17 | 7166093   | A | G | 0.01 | 0.38  | 0.05 | 6.75E-07  |
| PLA2G10 | rs112001035 | 17 | 68827664  | A | G | 0.06 | 0.16  | 0.02 | 5.04E-12  |
| PLA2G10 | rs1065853   | 19 | 44909976  | T | G | 0.08 | 0.21  | 0.01 | 3.53E-27  |
| PLA2G10 | rs516316    | 19 | 48702888  | C | G | 0.51 | -0.07 | 0.01 | 1.76E-11  |
| PLA2G10 | -           | 20 | 45925083  | T | A | 0.19 | -0.08 | 0.01 | 4.19E-09  |
| PLA2G15 | rs2187668   | 6  | 32638107  | T | C | 0.15 | 0.14  | 0.01 | 2.33E-19  |
| PLA2G15 | rs9346804   | 6  | 159979996 | A | G | 0.14 | -0.08 | 0.01 | 1.69E-06  |
| PLA2G15 | rs139130389 | 11 | 72139110  | A | C | 0.07 | -0.09 | 0.01 | 1.06E-05  |
| PLA2G15 | rs10778152  | 12 | 101831973 | G | A | 0.29 | -0.23 | 0.01 | 8.38E-81  |
| PLA2G15 | rs7965471   | 12 | 113358761 | C | A | 0.48 | 0.09  | 0.01 | 4.69E-14  |
| PLA2G15 | rs145078947 | 14 | 93186629  | T | G | 0.00 | 1.25  | 0.07 | 1.69E-31  |
| PLA2G15 | rs3743588   | 16 | 11742652  | A | G | 0.29 | 0.06  | 0.01 | 8.92E-07  |
| PLA2G15 | rs7672      | 16 | 68260897  | G | C | 0.71 | -0.25 | 0.01 | 6.97E-89  |
| PLA2G15 | rs186021206 | 17 | 7166093   | A | G | 0.01 | 0.47  | 0.05 | 8.02E-10  |
| PLA2G15 | -           | 17 | 46930667  | T | A | 0.64 | -0.05 | 0.01 | 7.62E-06  |
| PLA2G15 | rs58542926  | 19 | 19268740  | T | C | 0.08 | 0.12  | 0.01 | 3.82E-09  |
| PLA2G1B | rs35004807  | 1  | 50642739  | A | T | 0.34 | 0.06  | 0.01 | 1.82E-06  |
| PLA2G1B | rs1260326   | 2  | 27508073  | C | T | 0.61 | 0.05  | 0.01 | 1.18E-05  |
| PLA2G1B | rs17032925  | 2  | 67039351  | C | T | 0.08 | -0.09 | 0.01 | 1.17E-05  |
| PLA2G1B | rs376333472 | 2  | 240682394 | A | G | 0.02 | 0.17  | 0.02 | 2.30E-06  |
| PLA2G1B | rs1361108   | 6  | 126446454 | T | C | 0.46 | -0.08 | 0.01 | 6.41E-13  |
| PLA2G1B | rs7003060   | 8  | 18872308  | G | T | 0.70 | -0.06 | 0.01 | 5.75E-07  |
| PLA2G1B | rs1372993   | 8  | 128553416 | A | G | 0.12 | -0.16 | 0.01 | 1.01E-20  |
| PLA2G1B | rs116842520 | 9  | 133078678 | A | G | 0.04 | 0.14  | 0.02 | 4.13E-06  |
| PLA2G1B | rs2438988   | 10 | 48162047  | G | A | 0.64 | -0.07 | 0.01 | 6.45E-09  |
| PLA2G1B | rs4751995   | 10 | 116638373 | G | A | 0.52 | -0.08 | 0.01 | 1.80E-12  |
| PLA2G1B | rs61729512  | 12 | 7485173   | A | G | 0.12 | 0.08  | 0.01 | 6.40E-06  |
| PLA2G1B | rs11065078  | 12 | 120310782 | T | C | 0.21 | -0.07 | 0.01 | 3.61E-07  |
| PLA2G1B | rs56994090  | 14 | 100840110 | C | T | 0.42 | -0.05 | 0.01 | 7.61E-06  |
| PLA2G1B | rs72802342  | 16 | 75200974  | A | C | 0.08 | -0.20 | 0.01 | 1.05E-20  |
| PLA2G1B | rs1673931   | 16 | 88910069  | C | T | 0.38 | -0.13 | 0.01 | 2.03E-30  |
| PLA2G1B | rs1468481   | 17 | 71143838  | T | C | 0.77 | 0.06  | 0.01 | 6.20E-06  |
| PLA2G1B | rs6507586   | 18 | 44835125  | G | A | 0.08 | 0.09  | 0.01 | 9.96E-06  |
| PLA2G1B | rs681343    | 19 | 48703205  | T | C | 0.51 | 0.10  | 0.01 | 4.63E-21  |
| PLA2G1B | -           | 20 | 50218801  | T | C | 0.47 | -0.05 | 0.01 | 6.90E-06  |
| PLA2G1B | rs71327329  | 22 | 28931359  | G | A | 0.13 | -0.08 | 0.01 | 5.10E-06  |
| PLA2G2A | rs11573156  | 1  | 19979653  | C | G | 0.23 | 0.72  | 0.01 | 0.00E+00  |
| PLA2G2A | rs6698842   | 1  | 65699049  | T | C | 0.63 | 0.08  | 0.01 | 9.63E-13  |
| PLA2G2A | rs61729512  | 12 | 7485173   | A | G | 0.12 | 0.08  | 0.01 | 2.64E-07  |
| PLA2G2A | rs34931250  | 17 | 68883786  | T | C | 0.06 | 0.18  | 0.01 | 2.84E-18  |
| PLA2G2A | rs112896133 | 19 | 12318968  | A | G | 0.01 | -0.21 | 0.03 | 4.37E-06  |



|         |             |    |           |   |   |      |       |      |           |
|---------|-------------|----|-----------|---|---|------|-------|------|-----------|
| PLA2G2A | rs10405357  | 19 | 54255803  | C | T | 0.43 | -0.05 | 0.01 | 6.17E-06  |
| PLA2G4A | rs556306120 | 1  | 186967401 | C | G | 0.08 | 0.13  | 0.01 | 2.24E-09  |
| PLA2G4A | rs1354034   | 3  | 56815721  | C | T | 0.60 | 0.06  | 0.01 | 1.16E-07  |
| PLA2G4A | rs1149577   | 11 | 76834370  | C | T | 0.21 | 0.06  | 0.01 | 8.65E-06  |
| PLA2G7  | rs11591147  | 1  | 55039974  | T | G | 0.02 | -0.22 | 0.03 | 2.36E-07  |
| PLA2G7  | rs7528419   | 1  | 109274570 | G | A | 0.22 | -0.10 | 0.01 | 5.17E-14  |
| PLA2G7  | rs934197    | 2  | 21044589  | A | G | 0.34 | 0.05  | 0.01 | 1.07E-05  |
| PLA2G7  | rs6871667   | 5  | 75308917  | A | G | 0.40 | 0.05  | 0.01 | 5.71E-06  |
| PLA2G7  | rs574476364 | 6  | 46717995  | T | C | 0.00 | -1.45 | 0.11 | 1.90E-17  |
| PLA2G7  | rs13702     | 8  | 19966981  | C | T | 0.29 | -0.05 | 0.01 | 2.60E-05  |
| PLA2G7  | rs28601761  | 8  | 125487789 | G | C | 0.42 | -0.06 | 0.01 | 7.43E-08  |
| PLA2G7  | rs562028    | 11 | 60110377  | C | A | 0.63 | 0.08  | 0.01 | 2.61E-11  |
| PLA2G7  | rs964184    | 11 | 116778201 | C | G | 0.87 | -0.13 | 0.01 | 5.91E-16  |
| PLA2G7  | -           | 19 | 11085680  | A | C | 0.12 | -0.13 | 0.01 | 2.55E-14  |
| PLA2G7  | rs1065853   | 19 | 44909976  | T | G | 0.08 | -0.47 | 0.01 | 6.73E-123 |
| PLAT    | rs7765526   | 6  | 147392628 | G | A | 0.54 | 0.05  | 0.01 | 1.46E-05  |
| PLAT    | rs796629870 | 7  | 101126425 | G | T | 0.46 | -0.06 | 0.01 | 4.26E-08  |
| PLAT    | rs2020921   | 8  | 42187447  | A | G | 0.03 | -0.28 | 0.02 | 4.39E-16  |
| PLAT    | rs4576860   | 12 | 130788364 | G | A | 0.58 | -0.05 | 0.01 | 9.47E-07  |
| PLAT    | rs8112983   | 19 | 48726268  | C | T | 0.54 | 0.07  | 0.01 | 5.18E-10  |
| PLAU    | rs11888817  | 2  | 62303845  | C | T | 0.64 | 0.05  | 0.01 | 2.67E-06  |
| PLAU    | rs776068721 | 2  | 159943114 | T | G | 0.51 | -0.09 | 0.01 | 2.45E-15  |
| PLAU    | rs2470750   | 3  | 98971748  | T | A | 0.39 | -0.07 | 0.01 | 6.50E-09  |
| PLAU    | rs6858148   | 4  | 99144766  | C | T | 0.36 | 0.05  | 0.01 | 6.12E-06  |
| PLAU    | rs8176741   | 9  | 133256074 | A | G | 0.06 | 0.17  | 0.01 | 2.25E-14  |
| PLAU    | rs369705328 | 10 | 17806193  | C | G | 0.13 | 0.08  | 0.01 | 9.10E-07  |
| PLAU    | rs55744193  | 10 | 73912301  | A | G | 0.01 | -0.82 | 0.04 | 2.15E-38  |
| PLAU    | rs4055121   | 11 | 126362442 | T | C | 0.14 | -0.15 | 0.01 | 2.24E-20  |
| PLAU    | rs186021206 | 17 | 7166093   | A | G | 0.01 | 1.30  | 0.05 | 2.26E-69  |
| PLAU    | rs9948409   | 18 | 27181964  | G | A | 0.70 | 0.11  | 0.01 | 1.15E-20  |
| PLAU    | rs36229204  | 19 | 43671830  | T | C | 0.03 | -0.52 | 0.02 | 5.42E-64  |
| PLAUR   | rs72955755  | 2  | 159861821 | G | C | 0.46 | -0.10 | 0.01 | 2.74E-20  |
| PLAUR   | rs9378247   | 6  | 31353648  | A | G | 0.18 | -0.06 | 0.01 | 1.40E-05  |
| PLAUR   | rs8176672   | 9  | 133266772 | T | C | 0.06 | 0.11  | 0.01 | 2.35E-06  |
| PLAUR   | rs2688623   | 10 | 73929857  | T | C | 0.56 | 0.11  | 0.01 | 3.22E-22  |
| PLAUR   | rs2511241   | 11 | 73234296  | T | C | 0.93 | 0.14  | 0.01 | 4.04E-11  |
| PLAUR   | rs60843925  | 11 | 126368937 | C | T | 0.14 | -0.10 | 0.01 | 5.10E-09  |
| PLAUR   | rs7137828   | 12 | 111494996 | T | C | 0.52 | -0.05 | 0.01 | 9.84E-07  |
| PLAUR   | rs77924615  | 16 | 20381010  | A | G | 0.20 | -0.06 | 0.01 | 2.13E-05  |
| PLAUR   | rs186021206 | 17 | 7166093   | A | G | 0.01 | 0.90  | 0.05 | 1.13E-33  |
| PLAUR   | rs2241244   | 17 | 39997301  | C | G | 0.54 | -0.05 | 0.01 | 1.75E-05  |
| PLAUR   | rs2302524   | 19 | 43652320  | C | T | 0.17 | -0.18 | 0.01 | 5.83E-34  |
| PLIN1   | rs150004289 | 15 | 89673215  | A | G | 0.00 | -0.74 | 0.07 | 7.73E-12  |
| PLIN3   | rs6993770   | 8  | 105569300 | T | A | 0.29 | -0.06 | 0.01 | 1.29E-06  |
| PLIN3   | rs262557    | 19 | 4872083   | T | C | 0.76 | 0.08  | 0.01 | 1.81E-08  |
| PLPBP   | rs1354034   | 3  | 56815721  | C | T | 0.60 | 0.07  | 0.01 | 8.06E-09  |
| PLPBP   | rs6993770   | 8  | 105569300 | T | A | 0.29 | -0.06 | 0.01 | 1.02E-06  |
| PLTP    | rs34211178  | 3  | 98664718  | A | G | 0.44 | -0.08 | 0.01 | 1.41E-13  |
| PLTP    | rs3916027   | 8  | 19967357  | A | G | 0.26 | 0.05  | 0.01 | 7.76E-06  |
| PLTP    | rs13284054  | 9  | 104906792 | C | T | 0.12 | -0.07 | 0.01 | 8.21E-06  |
| PLTP    | rs174533    | 11 | 61781553  | A | G | 0.35 | -0.06 | 0.01 | 5.45E-07  |
| PLTP    | rs78689694  | 11 | 126364925 | C | G | 0.13 | -0.09 | 0.01 | 6.00E-09  |
| PLTP    | rs147233090 | 15 | 43735849  | T | C | 0.02 | -0.18 | 0.02 | 6.09E-07  |
| PLTP    | rs35853021  | 15 | 58388444  | T | G | 0.36 | 0.09  | 0.01 | 7.55E-17  |
| PLTP    | rs247617    | 16 | 56956804  | A | C | 0.32 | 0.12  | 0.01 | 1.94E-27  |
| PLTP    | rs4986970   | 16 | 67942417  | T | A | 0.04 | -0.13 | 0.02 | 1.72E-05  |

|          |             |    |           |   |   |      |       |      |           |
|----------|-------------|----|-----------|---|---|------|-------|------|-----------|
| PLTP     | rs186021206 | 17 | 7166093   | A | G | 0.01 | 0.98  | 0.05 | 4.41E-42  |
| PLTP     | rs6073958   | 20 | 45923216  | C | T | 0.20 | -0.50 | 0.01 | 6.33E-290 |
| PLXDC1   | rs3775298   | 4  | 186229324 | G | A | 0.51 | -0.07 | 0.01 | 4.79E-10  |
| PLXDC1   | rs11386832  | 5  | 96785666  | A | T | 0.74 | 0.13  | 0.01 | 7.05E-25  |
| PLXDC1   | rs885122    | 5  | 115995638 | G | A | 0.40 | -0.06 | 0.01 | 3.39E-06  |
| PLXDC1   | rs79428469  | 6  | 32634257  | C | T | 0.22 | 0.06  | 0.01 | 1.62E-05  |
| PLXDC1   | rs142988850 | 7  | 100166617 | G | A | 0.00 | 0.50  | 0.05 | 8.57E-10  |
| PLXDC1   | rs62076601  | 17 | 39067156  | T | C | 0.05 | -0.53 | 0.02 | 3.87E-86  |
| PLXNA4   | rs1354034   | 3  | 56815721  | C | T | 0.60 | 0.10  | 0.01 | 2.66E-17  |
| PLXNA4   | rs17622656  | 5  | 132485305 | A | G | 0.39 | -0.06 | 0.01 | 9.74E-08  |
| PLXNA4   | rs6467443   | 7  | 132553252 | T | G | 0.22 | 0.10  | 0.01 | 1.42E-13  |
| PLXNA4   | rs6993770   | 8  | 105569300 | T | A | 0.29 | -0.10 | 0.01 | 1.48E-16  |
| PLXNA4   | rs1671152   | 19 | 55014977  | G | T | 0.84 | 0.08  | 0.01 | 1.08E-06  |
| PLXNB2   | -           | 1  | 161704318 | G | A | 0.11 | 0.12  | 0.01 | 8.86E-15  |
| PLXNB2   | rs7523508   | 1  | 177968620 | G | A | 0.28 | -0.05 | 0.01 | 2.76E-06  |
| PLXNB2   | rs1260326   | 2  | 27508073  | C | T | 0.61 | 0.05  | 0.01 | 1.32E-07  |
| PLXNB2   | rs1126735   | 3  | 58427681  | G | A | 0.37 | 0.05  | 0.01 | 2.35E-07  |
| PLXNB2   | rs9269965   | 6  | 32584442  | G | A | 0.39 | -0.06 | 0.01 | 3.56E-07  |
| PLXNB2   | rs2519093   | 9  | 133266456 | T | C | 0.18 | -0.12 | 0.01 | 8.90E-22  |
| PLXNB2   | rs56278466  | 10 | 17833858  | G | T | 0.66 | 0.19  | 0.01 | 3.00E-80  |
| PLXNB2   | rs10774624  | 12 | 111395984 | A | G | 0.51 | -0.04 | 0.01 | 2.20E-05  |
| PLXNB2   | rs28929474  | 14 | 94378610  | T | C | 0.02 | 0.15  | 0.02 | 1.54E-05  |
| PLXNB2   | rs186021206 | 17 | 7166093   | A | G | 0.01 | 0.31  | 0.04 | 3.12E-06  |
| PLXNB2   | rs1801689   | 17 | 66214462  | C | A | 0.03 | 0.14  | 0.02 | 5.41E-07  |
| PLXNB2   | rs868876    | 19 | 7766340   | T | A | 0.30 | -0.06 | 0.01 | 6.13E-08  |
| PLXNB2   | rs11547731  | 22 | 50283705  | C | T | 0.65 | -0.70 | 0.01 | 0.00E+00  |
| PLXNB3   | rs9402686   | 6  | 135106679 | A | G | 0.27 | 0.06  | 0.01 | 1.10E-05  |
| PLXNB3   | rs6993770   | 8  | 105569300 | T | A | 0.29 | -0.06 | 0.01 | 1.46E-05  |
| PLXNB3   | rs409801    | 9  | 4744743   | C | T | 0.51 | 0.06  | 0.01 | 3.05E-07  |
| PLXNB3   | rs4502008   | 11 | 126417859 | T | G | 0.52 | -0.06 | 0.01 | 2.50E-07  |
| PLXNB3   | rs111338191 | 12 | 111388673 | T | A | 0.52 | -0.07 | 0.01 | 1.45E-08  |
| PLXNB3   | rs1613662   | 19 | 55025227  | A | G | 0.83 | 0.08  | 0.01 | 1.72E-06  |
| PM20D1   | rs760077    | 1  | 155208991 | T | A | 0.60 | -0.07 | 0.01 | 6.86E-10  |
| PM20D1   | rs112268616 | 1  | 205847765 | C | T | 0.34 | -0.83 | 0.01 | 0.00E+00  |
| PM20D1   | rs11680123  | 2  | 60287613  | G | A | 0.59 | 0.12  | 0.01 | 1.84E-41  |
| PM20D1   | rs121908120 | 2  | 218890289 | A | T | 0.03 | -0.12 | 0.02 | 1.17E-05  |
| PM20D1   | rs11707641  | 3  | 12114388  | C | T | 0.16 | 0.06  | 0.01 | 4.47E-06  |
| PM20D1   | rs12496730  | 3  | 98688089  | C | G | 0.44 | -0.04 | 0.01 | 2.06E-05  |
| PM20D1   | rs2519093   | 9  | 133266456 | T | C | 0.18 | -0.06 | 0.01 | 1.90E-06  |
| PM20D1   | -           | 10 | 95142972  | G | A | 0.58 | -0.05 | 0.01 | 5.68E-07  |
| PM20D1   | rs36034702  | 15 | 90191395  | T | C | 0.17 | -0.06 | 0.01 | 7.27E-07  |
| PMVK     | rs114951074 | 1  | 154931441 | T | C | 0.01 | -0.67 | 0.05 | 4.95E-21  |
| PMVK     | rs1354034   | 3  | 56815721  | C | T | 0.60 | 0.06  | 0.01 | 1.76E-06  |
| PMVK     | rs342293    | 7  | 106731773 | G | C | 0.46 | -0.07 | 0.01 | 3.85E-09  |
| PMVK     | rs6993770   | 8  | 105569300 | T | A | 0.29 | -0.06 | 0.01 | 8.08E-07  |
| PMVK     | rs7896518   | 10 | 63344740  | G | A | 0.42 | 0.05  | 0.01 | 8.19E-06  |
| PMVK     | rs6580981   | 12 | 54329244  | A | G | 0.46 | 0.05  | 0.01 | 1.18E-05  |
| PNLIPRP2 | rs4364486   | 6  | 96086513  | T | C | 0.79 | 0.04  | 0.01 | 1.93E-05  |
| PNLIPRP2 | rs8176743   | 9  | 133256028 | T | C | 0.06 | 0.20  | 0.01 | 2.20E-41  |
| PNLIPRP2 | rs56278466  | 10 | 17833858  | G | T | 0.66 | 0.05  | 0.01 | 1.65E-05  |
| PNLIPRP2 | rs4751995   | 10 | 116638373 | G | A | 0.52 | 1.13  | 0.01 | 0.00E+00  |
| PNLIPRP2 | rs72802342  | 16 | 75200974  | A | C | 0.08 | -0.11 | 0.01 | 4.30E-16  |
| PNLIPRP2 | rs2608894   | 19 | 5847989   | C | T | 0.76 | -0.04 | 0.01 | 1.11E-05  |
| PNLIPRP2 | rs601338    | 19 | 48703417  | A | G | 0.51 | 0.16  | 0.00 | 4.49E-103 |
| PNPT1    | rs9394070   | 6  | 31398518  | A | C | 0.06 | -0.14 | 0.02 | 5.49E-09  |
| PNPT1    | rs6001857   | 22 | 22335340  | C | T | 0.17 | -0.08 | 0.01 | 6.07E-07  |

|          |             |    |           |   |   |      |       |      |           |
|----------|-------------|----|-----------|---|---|------|-------|------|-----------|
| PODXL    | rs767298    | 7  | 7234953   | T | G | 0.63 | -0.16 | 0.01 | 3.51E-45  |
| PODXL    | rs3212298   | 7  | 131508980 | T | C | 0.04 | -0.56 | 0.02 | 3.41E-96  |
| PODXL    | rs590666    | 9  | 76488450  | C | T | 0.52 | -0.10 | 0.01 | 9.85E-18  |
| PODXL    | rs2519093   | 9  | 133266456 | T | C | 0.18 | -0.55 | 0.01 | 0.00E+00  |
| PODXL    | rs34434834  | 11 | 126437901 | A | G | 0.03 | 0.33  | 0.02 | 3.45E-28  |
| PODXL    | rs186021206 | 17 | 7166093   | A | G | 0.01 | 0.86  | 0.05 | 5.46E-30  |
| PODXL2   | rs61744853  | 1  | 34988050  | C | A | 0.01 | -0.25 | 0.04 | 1.39E-05  |
| PODXL2   | rs189026820 | 1  | 161616771 | A | G | 0.14 | 0.07  | 0.01 | 1.01E-05  |
| PODXL2   | rs61747728  | 1  | 179557079 | T | C | 0.04 | 0.13  | 0.02 | 1.03E-05  |
| PODXL2   | rs1047891   | 2  | 210675783 | A | C | 0.31 | 0.05  | 0.01 | 1.43E-05  |
| PODXL2   | rs13303     | 3  | 52523992  | C | T | 0.56 | 0.05  | 0.01 | 2.24E-05  |
| PODXL2   | -           | 3  | 127629383 | T | C | 0.01 | -1.11 | 0.03 | 2.30E-114 |
| PODXL2   | rs781656    | 4  | 56912479  | A | G | 0.18 | 0.17  | 0.01 | 9.56E-33  |
| PODXL2   | rs9471974   | 6  | 42951246  | A | T | 0.45 | -0.05 | 0.01 | 2.64E-05  |
| PODXL2   | -           | 9  | 133276163 | T | A | 0.19 | 0.07  | 0.01 | 8.27E-07  |
| PODXL2   | rs74841302  | 15 | 41792131  | A | G | 0.02 | -0.19 | 0.03 | 8.40E-06  |
| PODXL2   | rs9922607   | 16 | 17476363  | T | C | 0.21 | 0.11  | 0.01 | 4.22E-17  |
| PODXL2   | rs6504649   | 17 | 50360095  | G | C | 0.39 | -0.12 | 0.01 | 7.83E-25  |
| PODXL2   | rs55639531  | 18 | 394341    | G | C | 0.29 | 0.06  | 0.01 | 2.46E-06  |
| PODXL2   | rs45512696  | 19 | 35059974  | T | C | 0.18 | -0.07 | 0.01 | 3.01E-06  |
| POLR2F   | rs7137828   | 12 | 111494996 | T | C | 0.52 | -0.05 | 0.01 | 8.16E-06  |
| PON2     | rs149369377 | 1  | 196850349 | G | A | 0.20 | 0.07  | 0.01 | 3.16E-10  |
| PON2     | rs6961624   | 7  | 95408349  | C | T | 0.24 | -0.90 | 0.01 | 0.00E+00  |
| PON2     | rs28929474  | 14 | 94378610  | T | C | 0.02 | 0.21  | 0.02 | 1.50E-10  |
| PON2     | rs58542926  | 19 | 19268740  | T | C | 0.08 | 0.15  | 0.01 | 1.31E-18  |
| PON3     | rs6677604   | 1  | 196717788 | A | G | 0.19 | 0.09  | 0.01 | 2.25E-10  |
| PON3     | rs34060476  | 7  | 73623626  | G | A | 0.13 | 0.07  | 0.01 | 2.03E-05  |
| PON3     | rs149867961 | 7  | 95396432  | C | T | 0.03 | -1.05 | 0.02 | 1.07E-199 |
| PON3     | rs4240624   | 8  | 9326721   | A | G | 0.91 | 0.10  | 0.01 | 1.81E-07  |
| PON3     | rs3208305   | 8  | 19966137  | T | A | 0.29 | 0.06  | 0.01 | 1.28E-06  |
| PON3     | rs1077835   | 15 | 58431227  | G | A | 0.22 | 0.06  | 0.01 | 6.23E-06  |
| PON3     | rs247617    | 16 | 56956804  | A | C | 0.32 | 0.07  | 0.01 | 4.31E-10  |
| PON3     | rs149394327 | 17 | 66232877  | C | G | 0.03 | 0.18  | 0.02 | 1.13E-08  |
| PON3     | rs34415062  | 19 | 58511799  | A | G | 0.18 | 0.16  | 0.01 | 2.94E-31  |
| PPCDC    | rs1354034   | 3  | 56815721  | C | T | 0.60 | 0.05  | 0.01 | 7.65E-06  |
| PPCDC    | rs12591994  | 15 | 75027965  | G | A | 0.06 | 0.67  | 0.01 | 8.90E-193 |
| PPIB     | rs1354034   | 3  | 56815721  | C | T | 0.60 | 0.05  | 0.01 | 8.93E-06  |
| PPIB     | rs6993770   | 8  | 105569300 | T | A | 0.29 | -0.07 | 0.01 | 1.00E-08  |
| PPIB     | rs1671152   | 19 | 55014977  | G | T | 0.84 | 0.07  | 0.01 | 4.11E-06  |
| PPME1    | rs3782123   | 11 | 205198    | A | C | 0.73 | 0.06  | 0.01 | 5.99E-06  |
| PPP1R12A | rs68066031  | 2  | 224015781 | C | T | 0.23 | 0.10  | 0.01 | 2.87E-14  |
| PPP1R12A | rs1354034   | 3  | 56815721  | C | T | 0.60 | 0.05  | 0.01 | 3.48E-06  |
| PPP1R12A | rs17622656  | 5  | 132485305 | A | G | 0.39 | -0.05 | 0.01 | 1.71E-05  |
| PPP1R12A | rs342296    | 7  | 106732457 | A | G | 0.46 | -0.06 | 0.01 | 1.67E-08  |
| PPP1R2   | rs1354034   | 3  | 56815721  | C | T | 0.60 | 0.08  | 0.01 | 1.57E-11  |
| PPP1R2   | rs4746204   | 10 | 63568758  | T | C | 0.48 | -0.05 | 0.01 | 7.29E-06  |
| PPP1R2   | rs11502185  | 11 | 180258    | C | T | 0.26 | 0.07  | 0.01 | 1.28E-06  |
| PPP1R2   | rs1613662   | 19 | 55025227  | A | G | 0.83 | 0.07  | 0.01 | 1.52E-05  |
| PPP1R9B  | rs1354034   | 3  | 56815721  | C | T | 0.60 | 0.07  | 0.01 | 7.11E-09  |
| PPP1R9B  | rs342298    | 7  | 106733200 | T | C | 0.46 | -0.05 | 0.01 | 1.55E-05  |
| PPP3R1   | rs188468174 | 1  | 24965206  | T | C | 0.01 | -0.32 | 0.03 | 4.24E-11  |
| PPP3R1   | rs1354034   | 3  | 56815721  | C | T | 0.60 | 0.05  | 0.01 | 9.13E-06  |
| PPP3R1   | rs55768089  | 4  | 101822541 | A | T | 0.31 | 0.10  | 0.01 | 2.21E-17  |
| PPP3R1   | rs915651    | 6  | 31781407  | A | G | 0.13 | -0.08 | 0.01 | 1.73E-06  |
| PPP3R1   | rs9414801   | 10 | 63389329  | A | G | 0.53 | -0.07 | 0.01 | 9.06E-09  |
| PPY      | rs1493691   | 1  | 119989350 | A | G | 0.11 | -0.10 | 0.01 | 1.33E-08  |

|         |             |    |           |   |   |      |       |      |          |
|---------|-------------|----|-----------|---|---|------|-------|------|----------|
| PPY     | rs73174306  | 3  | 169476456 | T | A | 0.04 | 0.42  | 0.02 | 3.91E-52 |
| PPY     | rs6451770   | 5  | 44691293  | G | T | 0.38 | -0.06 | 0.01 | 3.63E-07 |
| PPY     | rs9348441   | 6  | 20680447  | A | T | 0.26 | -0.07 | 0.01 | 2.74E-07 |
| PPY     | rs9375435   | 6  | 126340712 | T | C | 0.45 | -0.06 | 0.01 | 7.97E-09 |
| PPY     | rs184163936 | 7  | 156988778 | C | T | 0.01 | -0.36 | 0.05 | 5.26E-07 |
| PPY     | rs2438988   | 10 | 48162047  | G | A | 0.64 | -0.21 | 0.01 | 6.70E-71 |
| PPY     | rs375124982 | 10 | 117370918 | T | G | 0.31 | -0.05 | 0.01 | 1.01E-05 |
| PPY     | rs139130389 | 11 | 72139110  | A | C | 0.07 | -0.09 | 0.01 | 2.39E-05 |
| PPY     | rs9320010   | 18 | 55386666  | G | A | 0.40 | 0.05  | 0.01 | 6.07E-06 |
| PRCP    | rs3010061   | 1  | 183855735 | T | C | 0.20 | 0.06  | 0.01 | 2.06E-05 |
| PRCP    | rs11125916  | 2  | 62382243  | A | C | 0.19 | 0.07  | 0.01 | 2.36E-06 |
| PRCP    | rs13111888  | 4  | 76210141  | A | G | 0.18 | 0.06  | 0.01 | 2.48E-05 |
| PRCP    | rs142032527 | 7  | 150521013 | T | A | 0.24 | -0.06 | 0.01 | 7.13E-06 |
| PRCP    | rs11250073  | 8  | 10774726  | T | G | 0.61 | -0.07 | 0.01 | 3.04E-09 |
| PRCP    | rs10104003  | 8  | 54509880  | T | C | 0.21 | 0.16  | 0.01 | 3.64E-35 |
| PRCP    | rs10116966  | 9  | 33122372  | A | T | 0.31 | -0.08 | 0.01 | 1.76E-12 |
| PRCP    | rs56278466  | 10 | 17833858  | G | T | 0.66 | 0.14  | 0.01 | 2.62E-37 |
| PRCP    | rs543233230 | 11 | 82795670  | A | C | 0.00 | -1.48 | 0.08 | 2.21E-33 |
| PRCP    | rs540730    | 12 | 57413331  | C | T | 0.75 | -0.08 | 0.01 | 1.80E-09 |
| PRCP    | rs4764823   | 12 | 101825988 | A | G | 0.29 | -0.22 | 0.01 | 3.73E-73 |
| PRCP    | rs145078947 | 14 | 93186629  | T | G | 0.00 | 1.06  | 0.07 | 3.75E-24 |
| PRCP    | rs738409    | 22 | 43928847  | G | C | 0.22 | 0.06  | 0.01 | 2.77E-05 |
| PRDX1   | rs2356552   | 1  | 45543644  | C | T | 0.90 | 0.11  | 0.01 | 7.22E-09 |
| PRDX1   | rs6993770   | 8  | 105569300 | T | A | 0.29 | -0.07 | 0.01 | 2.32E-07 |
| PRDX3   | rs7358070   | 10 | 119197216 | C | G | 0.32 | -0.07 | 0.01 | 1.38E-07 |
| PRDX5   | rs3847326   | 10 | 63572099  | G | A | 0.48 | -0.05 | 0.01 | 2.43E-05 |
| PRDX5   | rs77269065  | 11 | 64319797  | A | G | 0.01 | 0.99  | 0.05 | 3.00E-35 |
| PRDX6   | rs33951697  | 1  | 173489187 | T | C | 0.18 | 0.17  | 0.01 | 2.23E-33 |
| PRELP   | rs41313926  | 1  | 203483281 | A | G | 0.01 | -2.26 | 0.03 | 0.00E+00 |
| PRKAB1  | rs1354034   | 3  | 56815721  | C | T | 0.60 | 0.05  | 0.01 | 9.49E-06 |
| PRKAB1  | rs9414801   | 10 | 63389329  | A | G | 0.53 | -0.05 | 0.01 | 1.51E-05 |
| PRKAB1  | rs749140768 | 12 | 119671479 | A | C | 0.08 | 0.35  | 0.01 | 4.90E-60 |
| PRKAR1A | rs68066031  | 2  | 224015781 | C | T | 0.23 | 0.22  | 0.01 | 2.34E-57 |
| PRKAR1A | rs1354034   | 3  | 56815721  | C | T | 0.60 | 0.07  | 0.01 | 1.38E-08 |
| PRKAR1A | rs342293    | 7  | 106731773 | G | C | 0.46 | -0.05 | 0.01 | 2.90E-06 |
| PRKAR1A | rs7896518   | 10 | 63344740  | G | A | 0.42 | 0.06  | 0.01 | 2.58E-07 |
| PRKAR1A | rs1552950   | 15 | 101454028 | G | C | 0.29 | 0.07  | 0.01 | 9.46E-09 |
| PRKRA   | rs1354034   | 3  | 56815721  | C | T | 0.60 | 0.10  | 0.01 | 3.59E-18 |
| PRKRA   | rs11502185  | 11 | 180258    | C | T | 0.26 | 0.08  | 0.01 | 3.02E-07 |
| PRKRA   | rs60822569  | 12 | 54323724  | C | T | 0.55 | 0.07  | 0.01 | 2.07E-08 |
| PRKRA   | -           | 17 | 35559053  | T | A | 0.17 | 0.13  | 0.01 | 9.27E-19 |
| PRL     | rs4738      | 5  | 1461453   | T | C | 0.73 | -0.06 | 0.01 | 1.52E-05 |
| PRL     | -           | 6  | 126421582 | C | T | 0.47 | 0.07  | 0.01 | 5.41E-10 |
| PRL     | rs2094622   | 9  | 5105679   | A | C | 0.50 | -0.08 | 0.01 | 7.45E-12 |
| PRL     | rs11042976  | 11 | 2177029   | A | G | 0.48 | -0.05 | 0.01 | 6.65E-06 |
| PROC    | rs599839    | 1  | 109279544 | A | G | 0.77 | 0.08  | 0.01 | 2.98E-11 |
| PROC    | rs1260326   | 2  | 27508073  | C | T | 0.61 | -0.13 | 0.01 | 3.05E-33 |
| PROC    | rs1799810   | 2  | 127418464 | T | A | 0.43 | -0.20 | 0.01 | 4.81E-77 |
| PROC    | rs13108218  | 4  | 3442204   | G | A | 0.62 | -0.06 | 0.01 | 6.31E-07 |
| PROC    | -           | 4  | 82636278  | T | A | 0.19 | -0.06 | 0.01 | 1.82E-05 |
| PROC    | rs9275239   | 6  | 32692940  | A | G | 0.48 | 0.05  | 0.01 | 8.53E-07 |
| PROC    | rs13226650  | 7  | 73602675  | G | A | 0.20 | -0.08 | 0.01 | 1.36E-08 |
| PROC    | rs2393969   | 10 | 63380680  | C | A | 0.47 | -0.05 | 0.01 | 5.93E-06 |
| PROC    | rs149394327 | 17 | 66232877  | C | G | 0.03 | 0.14  | 0.02 | 7.68E-06 |
| PROC    | -           | 20 | 35180847  | G | T | 0.09 | 0.78  | 0.01 | 0.00E+00 |
| PROK1   | rs1857512   | 1  | 110450727 | A | G | 0.16 | 0.48  | 0.01 | 0.00E+00 |

|         |             |    |           |   |   |      |       |      |           |
|---------|-------------|----|-----------|---|---|------|-------|------|-----------|
| PROK1   | rs4607429   | 6  | 32616054  | C | G | 0.14 | -0.06 | 0.01 | 1.13E-07  |
| PROK1   | rs7497289   | 15 | 40041456  | A | G | 0.28 | 0.04  | 0.01 | 9.63E-06  |
| PRSS2   | rs2487583   | 1  | 119976376 | A | G | 0.11 | -0.08 | 0.01 | 2.36E-05  |
| PRSS2   | rs34296809  | 4  | 39392695  | C | T | 0.21 | 0.07  | 0.01 | 1.43E-06  |
| PRSS2   | rs446145    | 6  | 29553010  | C | G | 0.49 | 0.05  | 0.01 | 6.99E-06  |
| PRSS2   | rs9482772   | 6  | 127125645 | C | T | 0.45 | 0.08  | 0.01 | 3.12E-12  |
| PRSS2   | rs3752404   | 7  | 142762725 | G | A | 0.42 | -0.14 | 0.01 | 1.67E-33  |
| PRSS2   | rs748208    | 8  | 18855003  | C | T | 0.71 | -0.07 | 0.01 | 5.81E-08  |
| PRSS2   | rs4733612   | 8  | 128557753 | A | G | 0.73 | 0.07  | 0.01 | 2.75E-07  |
| PRSS2   | rs12216891  | 9  | 133251979 | T | C | 0.06 | 0.10  | 0.02 | 2.69E-05  |
| PRSS2   | rs174580    | 11 | 61839170  | G | A | 0.35 | 0.06  | 0.01 | 1.28E-07  |
| PRSS2   | rs686056    | 11 | 100775958 | A | G | 0.32 | -0.08 | 0.01 | 2.31E-10  |
| PRSS2   | rs72802342  | 16 | 75200974  | A | C | 0.08 | -0.27 | 0.01 | 5.85E-35  |
| PRSS2   | rs533406    | 16 | 88908452  | G | A | 0.38 | -0.10 | 0.01 | 1.67E-19  |
| PRSS2   | rs17138478  | 17 | 37713312  | A | C | 0.13 | 0.08  | 0.01 | 4.62E-06  |
| PRSS2   | rs7234846   | 18 | 44823175  | A | T | 0.08 | 0.11  | 0.01 | 4.47E-07  |
| PRSS27  | rs1036332   | 1  | 199043349 | C | A | 0.74 | -0.06 | 0.01 | 4.23E-06  |
| PRSS27  | rs545694574 | 3  | 141399127 | T | C | 0.42 | -0.09 | 0.01 | 2.50E-16  |
| PRSS27  | rs541115    | 3  | 187920304 | A | T | 0.34 | 0.05  | 0.01 | 2.35E-05  |
| PRSS27  | rs10010281  | 4  | 105184974 | C | G | 0.21 | 0.06  | 0.01 | 6.47E-07  |
| PRSS27  | rs2479005   | 6  | 2337266   | G | A | 0.47 | -0.16 | 0.01 | 7.17E-52  |
| PRSS27  | rs6993770   | 8  | 105569300 | T | A | 0.29 | 0.05  | 0.01 | 2.38E-05  |
| PRSS27  | rs3824458   | 9  | 33144811  | T | C | 0.31 | -0.06 | 0.01 | 9.41E-07  |
| PRSS27  | -           | 9  | 36291177  | T | C | 0.43 | -0.12 | 0.01 | 6.11E-31  |
| PRSS27  | rs141129381 | 9  | 97929618  | G | T | 0.36 | 0.08  | 0.01 | 7.38E-13  |
| PRSS27  | rs635634    | 9  | 133279427 | T | C | 0.18 | -0.06 | 0.01 | 9.33E-06  |
| PRSS27  | rs112972631 | 10 | 102598421 | T | G | 0.25 | -0.06 | 0.01 | 1.78E-06  |
| PRSS27  | rs546202    | 11 | 65742553  | C | T | 0.55 | 0.06  | 0.01 | 2.53E-09  |
| PRSS27  | rs11220477  | 11 | 126405507 | T | C | 0.04 | -0.52 | 0.02 | 1.23E-91  |
| PRSS27  | rs7306988   | 12 | 510642    | A | G | 0.17 | -0.07 | 0.01 | 5.12E-07  |
| PRSS27  | rs79755767  | 12 | 54304624  | A | G | 0.10 | 0.08  | 0.01 | 1.30E-05  |
| PRSS27  | rs71386687  | 16 | 2717893   | T | G | 0.08 | 0.38  | 0.01 | 9.49E-85  |
| PRSS27  | rs708686    | 19 | 5840608   | T | C | 0.27 | 0.16  | 0.01 | 2.27E-36  |
| PRSS27  | rs681343    | 19 | 48703205  | T | C | 0.51 | 0.55  | 0.01 | 0.00E+00  |
| PRSS27  | rs1654439   | 19 | 55042279  | G | T | 0.83 | 0.08  | 0.01 | 6.94E-07  |
| PRSS27  | rs587935    | 21 | 39538813  | T | C | 0.67 | 0.06  | 0.01 | 3.94E-07  |
| PRSS8   | rs1260326   | 2  | 27508073  | C | T | 0.61 | -0.07 | 0.01 | 2.64E-09  |
| PRSS8   | rs7714420   | 5  | 75044502  | C | A | 0.28 | -0.05 | 0.01 | 1.49E-05  |
| PRSS8   | rs28366311  | 6  | 32593360  | G | C | 0.28 | 0.06  | 0.01 | 5.16E-07  |
| PRSS8   | rs59084494  | 6  | 130036899 | A | G | 0.58 | 0.05  | 0.01 | 1.41E-05  |
| PRSS8   | rs35332062  | 7  | 73597712  | A | G | 0.13 | -0.11 | 0.01 | 4.91E-11  |
| PRSS8   | rs764066899 | 8  | 125480557 | A | T | 0.19 | 0.06  | 0.01 | 7.44E-06  |
| PRSS8   | rs62032958  | 16 | 365317    | A | G | 0.07 | -0.20 | 0.01 | 6.37E-21  |
| PRSS8   | rs889555    | 16 | 31111250  | T | C | 0.28 | 0.11  | 0.01 | 3.51E-22  |
| PRSS8   | rs149460787 | 17 | 47594412  | C | T | 0.51 | 0.06  | 0.01 | 3.38E-08  |
| PRSS8   | rs57822461  | 19 | 38241943  | T | C | 0.18 | -0.10 | 0.01 | 4.48E-12  |
| PRTFDC1 | rs17622656  | 5  | 132485305 | A | G | 0.39 | -0.05 | 0.01 | 2.62E-05  |
| PRTFDC1 | rs143356584 | 10 | 24952573  | T | C | 0.01 | -0.85 | 0.03 | 1.80E-67  |
| PRTFDC1 | rs4759076   | 12 | 54336088  | C | T | 0.46 | 0.06  | 0.01 | 1.99E-06  |
| PRTG    | rs13107325  | 4  | 102267552 | T | C | 0.08 | 0.10  | 0.01 | 2.96E-06  |
| PRTG    | rs28507026  | 6  | 32614708  | G | A | 0.16 | 0.07  | 0.01 | 7.75E-07  |
| PRTG    | rs8176746   | 9  | 133255935 | T | G | 0.06 | 0.30  | 0.01 | 1.05E-42  |
| PRTG    | rs10851591  | 15 | 55711507  | G | A | 0.69 | 0.45  | 0.01 | 4.47E-296 |
| PRTG    | rs7498431   | 16 | 88048298  | G | C | 0.61 | 0.09  | 0.01 | 3.62E-17  |
| PRTG    | rs186021206 | 17 | 7166093   | A | G | 0.01 | 0.57  | 0.05 | 7.27E-15  |
| PRTG    | rs704       | 17 | 28367840  | A | G | 0.47 | -0.06 | 0.01 | 1.30E-07  |

|       |             |    |           |   |   |      |       |      |           |
|-------|-------------|----|-----------|---|---|------|-------|------|-----------|
| PRTG  | rs77542162  | 17 | 69085137  | G | A | 0.02 | 0.18  | 0.02 | 4.26E-07  |
| PRTG  | rs6565921   | 18 | 76845797  | G | A | 0.63 | -0.06 | 0.01 | 7.71E-09  |
| PRTN3 | rs3917932   | 1  | 36478315  | G | C | 0.58 | -0.07 | 0.01 | 1.01E-10  |
| PRTN3 | rs10443175  | 1  | 76079728  | T | C | 0.23 | 0.07  | 0.01 | 3.07E-07  |
| PRTN3 | rs112694524 | 2  | 43226582  | A | G | 0.07 | 0.10  | 0.01 | 9.83E-06  |
| PRTN3 | rs13135092  | 4  | 102276925 | G | A | 0.08 | 0.09  | 0.01 | 1.42E-05  |
| PRTN3 | rs41559422  | 6  | 31355890  | A | G | 0.04 | 0.24  | 0.02 | 3.12E-17  |
| PRTN3 | rs915125    | 6  | 81753659  | T | C | 0.28 | 0.09  | 0.01 | 9.81E-13  |
| PRTN3 | rs11155297  | 6  | 143503967 | T | G | 0.26 | -0.06 | 0.01 | 3.01E-06  |
| PRTN3 | rs2977810   | 8  | 6957935   | C | T | 0.33 | 0.07  | 0.01 | 1.48E-08  |
| PRTN3 | rs10107630  | 8  | 129591389 | T | C | 0.57 | -0.09 | 0.01 | 8.14E-16  |
| PRTN3 | rs118119317 | 9  | 79611770  | A | G | 0.03 | -0.14 | 0.02 | 9.58E-06  |
| PRTN3 | rs73000965  | 11 | 114111599 | A | T | 0.32 | 0.06  | 0.01 | 1.28E-06  |
| PRTN3 | rs16942887  | 16 | 67894139  | A | G | 0.12 | 0.07  | 0.01 | 1.92E-05  |
| PRTN3 | rs6503533   | 17 | 40028327  | T | C | 0.62 | -0.09 | 0.01 | 9.44E-18  |
| PRTN3 | rs56378716  | 17 | 58279141  | G | A | 0.01 | 0.24  | 0.03 | 3.65E-07  |
| PRTN3 | rs10425544  | 19 | 836043    | C | T | 0.71 | 0.49  | 0.01 | 6.35E-300 |
| PSG1  | rs7526027   | 1  | 59218322  | C | T | 0.29 | 0.05  | 0.01 | 1.38E-06  |
| PSG1  | rs78689694  | 11 | 126364925 | C | G | 0.13 | -0.10 | 0.01 | 2.99E-13  |
| PSG1  | rs745680717 | 12 | 480706    | C | G | 0.40 | 0.04  | 0.01 | 1.53E-05  |
| PSG1  | rs909222    | 14 | 75443024  | C | A | 0.46 | 0.05  | 0.01 | 8.42E-07  |
| PSG1  | rs186021206 | 17 | 7166093   | A | G | 0.01 | 0.32  | 0.04 | 3.55E-07  |
| PSG1  | rs12986075  | 19 | 42868882  | A | G | 0.20 | -0.96 | 0.01 | 0.00E+00  |
| PSG1  | rs61740142  | 20 | 2483466   | C | T | 0.04 | -0.29 | 0.02 | 8.39E-35  |
| PSG1  | rs2426439   | 20 | 52383088  | C | T | 0.63 | 0.04  | 0.01 | 7.34E-06  |
| PSIP1 | rs1354034   | 3  | 56815721  | C | T | 0.60 | 0.13  | 0.01 | 1.73E-28  |
| PSIP1 | rs28383233  | 6  | 32616376  | A | G | 0.58 | 0.05  | 0.01 | 1.51E-05  |
| PSIP1 | rs7080536   | 10 | 113588287 | A | G | 0.04 | -0.15 | 0.02 | 4.47E-08  |
| PSIP1 | rs111338191 | 12 | 111388673 | T | A | 0.52 | -0.06 | 0.01 | 2.41E-07  |
| PSMD9 | -           | 12 | 121938985 | T | A | 0.29 | -0.19 | 0.01 | 2.12E-57  |
| PSME1 | rs1354034   | 3  | 56815721  | C | T | 0.60 | 0.05  | 0.01 | 3.05E-06  |
| PSME1 | rs35350651  | 12 | 111469627 | C | A | 0.50 | -0.05 | 0.01 | 2.62E-05  |
| PSME1 | rs2236352   | 14 | 24141524  | C | T | 0.26 | 0.09  | 0.01 | 6.22E-13  |
| PSME2 | rs2236352   | 14 | 24141524  | C | T | 0.26 | 0.10  | 0.01 | 2.12E-15  |
| PSMG3 | rs9503502   | 6  | 3260321   | A | T | 0.83 | -0.20 | 0.01 | 3.83E-41  |
| PSMG3 | rs34407549  | 7  | 1569176   | G | C | 0.01 | -0.29 | 0.04 | 1.13E-05  |
| PSMG3 | -           | 7  | 95305886  | C | A | 0.20 | -0.06 | 0.01 | 1.10E-05  |
| PSPN  | rs4381790   | 2  | 18490529  | A | C | 0.55 | -0.05 | 0.01 | 5.84E-08  |
| PSPN  | rs6542472   | 2  | 118571862 | C | A | 0.36 | 0.04  | 0.01 | 3.89E-06  |
| PSPN  | rs2102843   | 2  | 232303910 | C | T | 0.06 | -0.10 | 0.01 | 1.94E-07  |
| PSPN  | rs13111751  | 4  | 119129607 | G | C | 0.34 | -0.05 | 0.01 | 1.08E-06  |
| PSPN  | rs7488780   | 12 | 20426458  | C | G | 0.21 | -0.08 | 0.01 | 7.47E-14  |
| PSPN  | rs9543374   | 13 | 73469980  | T | C | 0.26 | -0.07 | 0.01 | 2.23E-13  |
| PSPN  | rs138903858 | 14 | 105168150 | T | G | 0.03 | -0.14 | 0.02 | 1.89E-07  |
| PSPN  | rs147382204 | 17 | 46691231  | G | T | 0.33 | 0.04  | 0.01 | 1.09E-05  |
| PSPN  | rs749522465 | 18 | 51383818  | A | G | 0.31 | 0.05  | 0.01 | 5.31E-07  |
| PSPN  | rs58634535  | 20 | 3660895   | A | G | 0.16 | -0.05 | 0.01 | 6.70E-06  |
| PSPN  | rs549768142 | 20 | 10669029  | T | G | 0.80 | 0.06  | 0.01 | 3.59E-09  |
| PSPN  | rs6517463   | 21 | 38380751  | T | C | 0.25 | 0.05  | 0.01 | 5.17E-07  |
| PSRC1 | rs34863121  | 1  | 109280836 | T | C | 0.01 | 0.71  | 0.03 | 8.43E-45  |
| PSRC1 | rs709049    | 20 | 32851058  | G | T | 0.55 | -0.06 | 0.01 | 1.30E-07  |
| PSRC1 | rs6070696   | 20 | 59022590  | G | A | 0.18 | 0.10  | 0.01 | 1.63E-10  |
| PTGDS | -           | 9  | 136964561 | C | T | 0.53 | 0.19  | 0.01 | 3.49E-72  |
| PTGDS | rs12934455  | 16 | 20345959  | T | C | 0.17 | -0.07 | 0.01 | 2.06E-06  |
| PTGDS | rs704       | 17 | 28367840  | A | G | 0.47 | 0.05  | 0.01 | 1.23E-05  |
| PTH1R | rs121434601 | 3  | 46898097  | T | C | 0.00 | 2.26  | 0.07 | 2.90E-95  |

|        |             |    |           |   |   |      |       |      |           |
|--------|-------------|----|-----------|---|---|------|-------|------|-----------|
| PTH1R  | rs428232    | 16 | 89647561  | C | T | 0.46 | 0.05  | 0.01 | 2.45E-05  |
| PTK7   | -           | 6  | 43069227  | A | T | 0.03 | 0.18  | 0.03 | 6.59E-06  |
| PTN    | rs28672722  | 6  | 32658760  | T | G | 0.22 | 0.06  | 0.01 | 6.07E-06  |
| PTN    | rs57122790  | 6  | 160729145 | A | G | 0.29 | 0.07  | 0.01 | 5.35E-09  |
| PTN    | rs10271620  | 7  | 137332456 | A | G | 0.43 | 0.15  | 0.01 | 1.24E-42  |
| PTN    | -           | 8  | 105561296 | C | A | 0.27 | -0.06 | 0.01 | 9.81E-06  |
| PTN    | -           | 9  | 133274293 | A | C | 0.18 | -0.10 | 0.01 | 3.01E-11  |
| PTN    | rs1654425   | 19 | 55027612  | C | T | 0.83 | 0.07  | 0.01 | 4.28E-06  |
| PTPN1  | rs1354034   | 3  | 56815721  | C | T | 0.60 | 0.08  | 0.01 | 3.35E-13  |
| PTPN1  | rs342293    | 7  | 106731773 | G | C | 0.46 | -0.05 | 0.01 | 1.34E-05  |
| PTPN1  | rs7080536   | 10 | 113588287 | A | G | 0.04 | -0.19 | 0.02 | 6.79E-12  |
| PTPN6  | rs1354034   | 3  | 56815721  | C | T | 0.60 | 0.06  | 0.01 | 1.15E-06  |
| PTPN6  | rs342298    | 7  | 106733200 | T | C | 0.45 | -0.07 | 0.01 | 3.64E-10  |
| PTPRF  | rs2842194   | 1  | 43563291  | A | G | 0.22 | -0.09 | 0.01 | 2.67E-11  |
| PTPRF  | rs2090034   | 2  | 20172648  | A | G | 0.47 | 0.06  | 0.01 | 6.19E-08  |
| PTPRF  | rs9873618   | 3  | 171015287 | A | G | 0.29 | -0.06 | 0.01 | 1.44E-07  |
| PTPRF  | rs4860974   | 4  | 68598436  | C | G | 0.28 | -0.06 | 0.01 | 1.62E-05  |
| PTPRF  | rs17039766  | 4  | 109085276 | A | C | 0.06 | 0.29  | 0.02 | 2.74E-34  |
| PTPRF  | rs2308527   | 6  | 31272044  | T | G | 0.59 | -0.06 | 0.01 | 1.65E-07  |
| PTPRF  | rs581080    | 9  | 15305380  | C | G | 0.82 | 0.06  | 0.01 | 9.97E-06  |
| PTPRF  | rs507666    | 9  | 133273983 | A | G | 0.18 | -0.08 | 0.01 | 5.00E-09  |
| PTPRF  | rs7088799   | 10 | 63256414  | G | T | 0.41 | 0.07  | 0.01 | 6.12E-10  |
| PTPRF  | rs9633740   | 10 | 80505515  | G | A | 0.80 | 0.14  | 0.01 | 1.12E-23  |
| PTPRF  | rs1535      | 11 | 61830500  | G | A | 0.35 | 0.05  | 0.01 | 4.63E-06  |
| PTPRF  | rs11045856  | 12 | 21197755  | G | T | 0.24 | 0.09  | 0.01 | 1.60E-13  |
| PTPRF  | rs28929474  | 14 | 94378610  | T | C | 0.02 | 0.33  | 0.02 | 2.93E-18  |
| PTPRF  | rs1801689   | 17 | 66214462  | C | A | 0.03 | -0.22 | 0.02 | 2.06E-11  |
| PTPRF  | rs1065853   | 19 | 44909976  | T | G | 0.08 | 0.09  | 0.01 | 2.30E-05  |
| PTPRF  | rs679574    | 19 | 48702851  | G | C | 0.51 | -0.10 | 0.01 | 1.75E-19  |
| PTPRM  | rs61804211  | 1  | 161701516 | T | G | 0.10 | 0.10  | 0.01 | 3.88E-09  |
| PTPRM  | rs13107325  | 4  | 102267552 | T | C | 0.07 | 0.11  | 0.01 | 1.43E-09  |
| PTPRM  | rs9270047   | 6  | 32585920  | C | T | 0.43 | -0.05 | 0.01 | 3.14E-06  |
| PTPRM  | rs2519093   | 9  | 133266456 | T | C | 0.18 | -0.70 | 0.01 | 0.00E+00  |
| PTPRM  | rs12359178  | 10 | 17847614  | A | G | 0.14 | 0.08  | 0.01 | 2.98E-08  |
| PTPRM  | -           | 10 | 80546526  | A | T | 0.33 | -0.05 | 0.01 | 1.47E-05  |
| PTPRM  | rs11603123  | 11 | 126435600 | A | G | 0.03 | 0.18  | 0.02 | 9.93E-11  |
| PTPRM  | rs186021206 | 17 | 7166093   | A | G | 0.01 | 0.66  | 0.04 | 8.87E-23  |
| PTPRM  | rs72911294  | 18 | 8253604   | T | C | 0.27 | -0.08 | 0.01 | 3.42E-11  |
| PTPRM  | rs5757659   | 22 | 39416404  | G | T | 0.69 | -0.06 | 0.01 | 8.69E-08  |
| PTPRN2 | rs3800860   | 7  | 158110812 | T | C | 0.36 | -0.15 | 0.01 | 8.11E-40  |
| PTPRN2 | rs113878851 | 16 | 20353760  | T | C | 0.17 | -0.07 | 0.01 | 3.71E-06  |
| PTPRS  | rs1260326   | 2  | 27508073  | C | T | 0.61 | 0.09  | 0.01 | 8.26E-16  |
| PTPRS  | -           | 3  | 136181921 | A | T | 0.70 | 0.08  | 0.01 | 1.11E-11  |
| PTPRS  | rs545971    | 9  | 133267960 | T | C | 0.32 | 0.06  | 0.01 | 2.54E-06  |
| PTPRS  | rs144268704 | 15 | 63500022  | G | A | 0.34 | 0.08  | 0.01 | 1.40E-11  |
| PTPRS  | rs186021206 | 17 | 7166093   | A | G | 0.01 | 0.42  | 0.05 | 7.21E-08  |
| PTPRS  | rs77542162  | 17 | 69085137  | G | A | 0.02 | 0.16  | 0.02 | 2.75E-05  |
| PTPRS  | rs55763631  | 19 | 5293572   | A | C | 0.05 | 0.65  | 0.02 | 6.06E-120 |
| PTS    | rs183616935 | 3  | 52504351  | C | A | 0.01 | 0.47  | 0.05 | 4.49E-10  |
| PTS    | rs112875651 | 8  | 125494452 | A | G | 0.39 | -0.05 | 0.01 | 7.07E-06  |
| PTS    | rs12796145  | 11 | 112205864 | C | G | 0.23 | -0.24 | 0.01 | 1.63E-69  |
| PTS    | rs738408    | 22 | 43928850  | T | C | 0.22 | 0.08  | 0.01 | 1.22E-09  |
| PTX3   | rs678       | 3  | 52786965  | T | A | 0.36 | -0.08 | 0.01 | 2.61E-10  |
| PTX3   | rs1056522   | 3  | 126542502 | A | G | 0.30 | 0.22  | 0.01 | 2.20E-74  |
| PTX3   | rs56025932  | 3  | 157438069 | C | A | 0.04 | -0.16 | 0.02 | 6.61E-08  |
| PTX3   | rs41341748  | 8  | 16155085  | A | G | 0.01 | 0.33  | 0.03 | 1.09E-09  |

|          |             |    |           |   |   |      |       |      |           |
|----------|-------------|----|-----------|---|---|------|-------|------|-----------|
| PTX3     | rs7084817   | 10 | 7732395   | G | C | 0.05 | -0.63 | 0.02 | 8.84E-136 |
| PVALB    | rs72642137  | 1  | 2298478   | T | C | 0.21 | 0.05  | 0.01 | 1.77E-05  |
| PVALB    | rs3811444   | 1  | 247876149 | T | C | 0.33 | -0.07 | 0.01 | 1.98E-11  |
| PVALB    | rs10820606  | 9  | 96430637  | C | A | 0.23 | 0.05  | 0.01 | 8.76E-06  |
| PVALB    | rs7896518   | 10 | 63344740  | G | A | 0.42 | 0.06  | 0.01 | 1.51E-09  |
| PVALB    | rs6580981   | 12 | 54329244  | A | G | 0.46 | 0.05  | 0.01 | 2.33E-07  |
| PVALB    | rs11553699  | 12 | 121779004 | G | A | 0.14 | -0.06 | 0.01 | 2.19E-05  |
| PVALB    | rs11865642  | 16 | 8956780   | C | A | 0.19 | 0.05  | 0.01 | 1.51E-05  |
| PVALB    | rs4821544   | 22 | 36862461  | C | T | 0.30 | -0.81 | 0.01 | 0.00E+00  |
| PVR      | rs573252567 | 7  | 73589224  | A | T | 0.11 | -0.08 | 0.01 | 5.68E-07  |
| PVR      | rs200489612 | 17 | 7203059   | A | G | 0.01 | 0.32  | 0.04 | 8.15E-06  |
| PVR      | rs2301274   | 19 | 44643102  | C | T | 0.24 | -0.78 | 0.01 | 0.00E+00  |
| PXN      | rs3129754   | 6  | 32615269  | G | A | 0.42 | 0.05  | 0.01 | 5.52E-07  |
| PXN      | rs4767884   | 12 | 120224174 | C | T | 0.77 | 0.76  | 0.01 | 0.00E+00  |
| PXN      | rs4632248   | 19 | 53821741  | T | G | 0.21 | 0.07  | 0.01 | 1.08E-07  |
| QDPR     | rs1354034   | 3  | 56815721  | C | T | 0.60 | 0.06  | 0.01 | 1.03E-07  |
| QDPR     | -           | 4  | 17512134  | C | G | 0.25 | -0.45 | 0.01 | 6.75E-254 |
| QPCT     | rs188468174 | 1  | 24965206  | T | C | 0.01 | -0.38 | 0.03 | 1.30E-15  |
| QPCT     | rs61747728  | 1  | 179557079 | T | C | 0.04 | 0.13  | 0.02 | 1.50E-05  |
| QPCT     | rs4670696   | 2  | 37372820  | C | A | 0.02 | -0.88 | 0.02 | 3.80E-123 |
| QPCT     | rs4634107   | 3  | 186623604 | T | G | 0.52 | 0.07  | 0.01 | 6.70E-10  |
| QPCT     | rs1130389   | 6  | 32664850  | T | C | 0.15 | -0.08 | 0.01 | 1.65E-06  |
| QPCT     | rs111632177 | 7  | 151234719 | A | G | 0.11 | 0.09  | 0.01 | 1.11E-07  |
| QPCT     | rs13277237  | 8  | 129592317 | A | G | 0.57 | -0.07 | 0.01 | 2.24E-09  |
| QPCT     | rs56278466  | 10 | 17833858  | G | T | 0.66 | 0.09  | 0.01 | 1.30E-13  |
| QPCT     | rs10896045  | 11 | 65788053  | G | A | 0.70 | -0.15 | 0.01 | 7.33E-35  |
| QPCT     | rs3803800   | 17 | 7559652   | G | A | 0.79 | -0.06 | 0.01 | 2.37E-05  |
| QPCT     | rs34562254  | 17 | 16939677  | A | G | 0.10 | 0.12  | 0.01 | 1.12E-10  |
| QPCT     | -           | 17 | 39988115  | T | A | 0.54 | -0.06 | 0.01 | 1.09E-06  |
| QPCT     | rs2725405   | 17 | 81246424  | C | G | 0.44 | 0.05  | 0.01 | 8.58E-06  |
| RAB6A    | rs5030062   | 3  | 186736391 | C | A | 0.37 | 0.19  | 0.01 | 3.46E-68  |
| RAB6A    | rs4861708   | 4  | 186236079 | A | G | 0.51 | 0.39  | 0.01 | 1.68E-271 |
| RAB6A    | rs1801020   | 5  | 177409531 | G | A | 0.74 | 0.20  | 0.01 | 2.68E-62  |
| RAB6A    | rs35939600  | 11 | 73840098  | T | A | 0.15 | 0.07  | 0.01 | 3.29E-06  |
| RAB6A    | rs821840    | 16 | 56959974  | G | A | 0.33 | 0.07  | 0.01 | 1.34E-08  |
| RABEPK   | rs11788700  | 9  | 125220102 | A | G | 0.15 | 0.21  | 0.01 | 1.45E-35  |
| RABGAP1L | rs6661868   | 1  | 174107629 | G | A | 0.20 | 0.09  | 0.01 | 1.48E-10  |
| RABGAP1L | rs1354034   | 3  | 56815721  | C | T | 0.60 | 0.06  | 0.01 | 1.63E-06  |
| RAD23B   | rs1354034   | 3  | 56815721  | C | T | 0.60 | 0.05  | 0.01 | 1.52E-05  |
| RAD23B   | rs6993770   | 8  | 105569300 | T | A | 0.29 | -0.06 | 0.01 | 5.12E-06  |
| RAD23B   | rs7035725   | 9  | 107287633 | G | C | 0.55 | -0.06 | 0.01 | 5.86E-08  |
| RARRES1  | rs6441224   | 3  | 158732628 | C | T | 0.53 | 0.46  | 0.01 | 0.00E+00  |
| RARRES2  | rs780094    | 2  | 27518370  | C | T | 0.62 | -0.05 | 0.01 | 1.80E-05  |
| RARRES2  | rs1265905   | 6  | 31942164  | G | A | 0.13 | -0.10 | 0.01 | 1.16E-08  |
| RARRES2  | rs3735167   | 7  | 150342466 | T | C | 0.26 | 0.21  | 0.01 | 4.66E-64  |
| RASSF2   | rs1104902   | 20 | 4823485   | A | C | 0.57 | 0.09  | 0.01 | 5.90E-16  |
| RASSF2   | rs575652543 | 20 | 44990397  | T | C | 0.17 | -0.07 | 0.01 | 1.83E-05  |
| RBKS     | rs140948699 | 2  | 27858572  | G | C | 0.01 | -1.81 | 0.04 | 3.69E-214 |
| RBP2     | rs1375131   | 2  | 135197227 | C | T | 0.26 | 0.06  | 0.01 | 9.53E-06  |
| RBP2     | rs295469    | 3  | 139494058 | A | G | 0.38 | -0.07 | 0.01 | 4.15E-09  |
| RBP2     | rs6472539   | 8  | 70717575  | C | G | 0.51 | -0.06 | 0.01 | 1.61E-07  |
| RBP2     | rs11605127  | 11 | 268430    | G | C | 0.24 | 0.11  | 0.01 | 2.90E-16  |
| RBP5     | rs746441505 | 6  | 116455480 | C | T | 0.41 | 0.07  | 0.01 | 1.29E-10  |
| RBP5     | rs112875651 | 8  | 125494452 | A | G | 0.39 | -0.05 | 0.01 | 3.93E-06  |
| RBP5     | rs1110236   | 9  | 93140313  | A | G | 0.13 | -0.09 | 0.01 | 2.39E-08  |
| RBP5     | rs11370710  | 9  | 114396677 | A | C | 0.49 | -0.05 | 0.01 | 1.89E-06  |



|       |             |    |           |   |   |      |       |      |           |
|-------|-------------|----|-----------|---|---|------|-------|------|-----------|
| RBP5  | rs76904513  | 12 | 7125522   | G | A | 0.09 | -0.51 | 0.01 | 1.54E-154 |
| RCOR1 | rs7214731   | 17 | 66216248  | T | C | 0.28 | 0.06  | 0.01 | 1.25E-06  |
| REG1A | rs11126696  | 2  | 79096762  | G | A | 0.62 | 0.25  | 0.01 | 6.66E-109 |
| REG1A | rs9274437   | 6  | 32665397  | T | C | 0.25 | 0.06  | 0.01 | 1.02E-06  |
| REG1A | rs529565    | 9  | 133274084 | C | T | 0.32 | 0.14  | 0.01 | 1.85E-33  |
| REG1A | rs4421693   | 10 | 122546912 | T | G | 0.58 | 0.18  | 0.01 | 4.04E-63  |
| REG1A | rs708686    | 19 | 5840608   | T | C | 0.27 | 0.10  | 0.01 | 1.71E-17  |
| REG1A | rs679574    | 19 | 48702851  | G | C | 0.51 | -0.19 | 0.01 | 3.16E-66  |
| REG1B | rs11126696  | 2  | 79096762  | G | A | 0.62 | 0.34  | 0.01 | 1.61E-202 |
| REG1B | rs529565    | 9  | 133274084 | C | T | 0.32 | 0.16  | 0.01 | 7.20E-43  |
| REG1B | rs4421693   | 10 | 122546912 | T | G | 0.58 | 0.11  | 0.01 | 4.56E-26  |
| REG1B | rs17802036  | 12 | 68273489  | T | C | 0.29 | -0.05 | 0.01 | 2.24E-05  |
| REG1B | rs72802342  | 16 | 75200974  | A | C | 0.08 | -0.19 | 0.01 | 1.24E-19  |
| REG1B | rs708686    | 19 | 5840608   | T | C | 0.27 | 0.09  | 0.01 | 1.10E-13  |
| REG1B | rs492602    | 19 | 48703160  | G | A | 0.51 | -0.18 | 0.01 | 1.89E-64  |
| REG3A | rs147616162 | 2  | 79168385  | A | T | 0.06 | 0.40  | 0.02 | 6.82E-68  |
| REG3A | rs11707109  | 3  | 40873097  | G | A | 0.14 | -0.07 | 0.01 | 2.54E-06  |
| REG3A | rs35846682  | 6  | 41714748  | T | C | 0.09 | 0.13  | 0.01 | 9.69E-12  |
| REG3A | rs12201703  | 6  | 105954433 | A | G | 0.08 | -0.16 | 0.01 | 9.07E-16  |
| REG3A | rs11761603  | 7  | 1247276   | C | T | 0.70 | 0.05  | 0.01 | 2.73E-05  |
| REG3A | rs146649678 | 8  | 6925915   | A | G | 0.00 | 0.47  | 0.07 | 1.14E-05  |
| REG3A | rs2048528   | 8  | 23516167  | A | G | 0.32 | -0.06 | 0.01 | 1.20E-06  |
| REG3A | -           | 12 | 31958971  | C | T | 0.44 | 0.06  | 0.01 | 1.62E-08  |
| REG3A | rs17338413  | 15 | 75182595  | T | C | 0.08 | -0.35 | 0.01 | 6.03E-69  |
| REG3A | rs11701433  | 21 | 38924487  | T | C | 0.67 | -0.05 | 0.01 | 1.27E-05  |
| REG4  | rs147859708 | 1  | 8809045   | A | G | 0.03 | -0.18 | 0.03 | 5.43E-06  |
| REG4  | rs79795228  | 1  | 119816663 | A | C | 0.02 | 0.63  | 0.03 | 2.32E-51  |
| REG4  | rs587654685 | 1  | 143975430 | T | C | 0.01 | 0.48  | 0.04 | 8.03E-14  |
| REG4  | rs137872268 | 1  | 149005418 | C | T | 0.02 | 0.26  | 0.03 | 9.04E-10  |
| REG4  | -           | 8  | 11807586  | T | A | 0.58 | -0.05 | 0.01 | 9.91E-06  |
| RELT  | rs1398018   | 4  | 76451770  | C | T | 0.44 | 0.05  | 0.01 | 2.72E-06  |
| RELT  | rs56801796  | 11 | 73379220  | G | A | 0.21 | 0.40  | 0.01 | 7.60E-218 |
| RELT  | rs3184504   | 12 | 111446804 | C | T | 0.52 | -0.06 | 0.01 | 3.90E-09  |
| RELT  | rs77924615  | 16 | 20381010  | A | G | 0.20 | -0.07 | 0.01 | 3.05E-07  |
| REN   | rs112009694 | 1  | 163677855 | T | C | 0.55 | -0.06 | 0.01 | 3.28E-07  |
| REN   | rs193280350 | 1  | 204179521 | A | G | 0.01 | 0.84  | 0.04 | 2.34E-38  |
| REN   | rs116219813 | 2  | 203216952 | T | C | 0.13 | 0.10  | 0.01 | 3.47E-09  |
| RET   | rs6747755   | 2  | 100961996 | A | G | 0.22 | 0.06  | 0.01 | 4.74E-06  |
| RET   | rs6762552   | 3  | 98712363  | T | C | 0.69 | -0.08 | 0.01 | 1.71E-12  |
| RET   | rs7856189   | 9  | 98878916  | C | T | 0.61 | -0.05 | 0.01 | 1.14E-05  |
| RET   | rs189906184 | 10 | 38695562  | T | A | 0.02 | 0.39  | 0.02 | 3.65E-25  |
| RET   | rs2795507   | 10 | 42857446  | C | T | 0.79 | -0.44 | 0.01 | 9.50E-228 |
| RET   | rs35887873  | 11 | 126349501 | C | T | 0.23 | 0.09  | 0.01 | 1.92E-11  |
| RET   | rs186021206 | 17 | 7166093   | A | G | 0.01 | 0.45  | 0.05 | 1.09E-09  |
| RET   | rs9952412   | 18 | 48939170  | C | A | 0.52 | 0.05  | 0.01 | 2.33E-05  |
| RETN  | rs3917932   | 1  | 36478315  | G | C | 0.58 | -0.06 | 0.01 | 1.43E-08  |
| RETN  | rs17405635  | 2  | 43128624  | A | G | 0.26 | 0.09  | 0.01 | 1.04E-13  |
| RETN  | rs2305637   | 3  | 47004356  | T | C | 0.18 | 0.07  | 0.01 | 5.67E-07  |
| RETN  | rs9880192   | 3  | 128578726 | C | G | 0.41 | -0.05 | 0.01 | 1.24E-05  |
| RETN  | rs218264    | 4  | 54542708  | T | A | 0.25 | 0.06  | 0.01 | 1.42E-06  |
| RETN  | rs13107325  | 4  | 102267552 | T | C | 0.08 | 0.11  | 0.01 | 7.88E-07  |
| RETN  | rs149110519 | 6  | 144064640 | T | C | 0.04 | 0.39  | 0.02 | 5.21E-40  |
| RETN  | rs445       | 7  | 92779056  | T | C | 0.09 | -0.11 | 0.01 | 1.09E-08  |
| RETN  | rs4407843   | 8  | 129597122 | C | A | 0.57 | -0.08 | 0.01 | 4.09E-14  |
| RETN  | rs2074038   | 11 | 44066439  | T | G | 0.10 | 0.11  | 0.01 | 9.65E-10  |
| RETN  | rs11642657  | 16 | 85982722  | T | C | 0.01 | 0.31  | 0.04 | 4.22E-06  |

|         |             |    |           |   |   |      |       |      |           |
|---------|-------------|----|-----------|---|---|------|-------|------|-----------|
| RETN    | rs2241244   | 17 | 39997301  | C | G | 0.54 | -0.11 | 0.01 | 8.20E-23  |
| RETN    | rs3219175   | 19 | 7668969   | A | G | 0.01 | 1.53  | 0.05 | 1.86E-106 |
| RETN    | rs6069597   | 20 | 38294325  | C | T | 0.53 | -0.06 | 0.01 | 7.94E-08  |
| RETN    | rs243591    | 21 | 17783489  | C | A | 0.48 | -0.06 | 0.01 | 4.43E-07  |
| RGMA    | rs147440039 | 1  | 146039631 | G | C | 0.03 | -0.15 | 0.02 | 1.62E-06  |
| RGMA    | rs10800097  | 1  | 165414556 | G | A | 0.37 | -0.05 | 0.01 | 2.25E-05  |
| RGMA    | rs1260326   | 2  | 27508073  | C | T | 0.61 | 0.08  | 0.01 | 2.97E-13  |
| RGMA    | rs6804368   | 3  | 30712081  | G | A | 0.44 | -0.07 | 0.01 | 2.15E-10  |
| RGMA    | rs13147041  | 4  | 82951522  | T | C | 0.36 | -0.05 | 0.01 | 6.79E-06  |
| RGMA    | rs13107325  | 4  | 102267552 | T | C | 0.08 | -0.09 | 0.01 | 5.79E-06  |
| RGMA    | rs11956061  | 5  | 126910206 | T | C | 0.48 | 0.07  | 0.01 | 7.27E-11  |
| RGMA    | rs4841132   | 8  | 9326086   | G | A | 0.91 | -0.09 | 0.01 | 8.30E-06  |
| RGMA    | rs1885372   | 9  | 35838033  | G | A | 0.41 | -0.28 | 0.01 | 2.01E-142 |
| RGMA    | rs657152    | 9  | 133263862 | A | C | 0.34 | 0.05  | 0.01 | 2.40E-05  |
| RGMA    | rs7303452   | 12 | 50913366  | C | T | 0.66 | -0.05 | 0.01 | 1.95E-05  |
| RGMA    | rs705702    | 12 | 55996852  | G | A | 0.34 | 0.06  | 0.01 | 1.55E-07  |
| RGMA    | rs68109100  | 13 | 73614638  | G | A | 0.50 | 0.05  | 0.01 | 1.91E-05  |
| RGMA    | rs4775282   | 15 | 60645725  | T | A | 0.35 | -0.06 | 0.01 | 7.72E-07  |
| RGMA    | rs56058910  | 15 | 72833697  | C | T | 0.14 | 0.08  | 0.01 | 3.59E-07  |
| RGMA    | rs3752102   | 15 | 93072785  | A | C | 0.47 | -0.23 | 0.01 | 9.17E-99  |
| RGMA    | rs71149134  | 16 | 20347025  | T | C | 0.17 | -0.06 | 0.01 | 2.44E-05  |
| RGMA    | rs117353460 | 16 | 89240295  | T | C | 0.03 | 0.16  | 0.02 | 6.08E-08  |
| RGMA    | rs2904766   | 17 | 39692424  | G | A | 0.67 | 0.06  | 0.01 | 2.87E-07  |
| RGMA    | rs73597479  | 19 | 35054481  | T | C | 0.04 | 0.12  | 0.02 | 2.46E-05  |
| RGMB    | rs61747728  | 1  | 179557079 | T | C | 0.04 | 0.14  | 0.02 | 1.55E-06  |
| RGMB    | rs56870134  | 5  | 98437819  | T | C | 0.55 | 0.17  | 0.01 | 5.85E-53  |
| RGMB    | rs765574776 | 5  | 177371069 | G | C | 0.26 | 0.06  | 0.01 | 1.85E-05  |
| RGMB    | rs12359178  | 10 | 17847614  | A | G | 0.14 | 0.08  | 0.01 | 1.52E-07  |
| RGMB    | rs34262842  | 16 | 20344489  | G | A | 0.17 | -0.09 | 0.01 | 6.79E-09  |
| RGS8    | rs34917868  | 14 | 106618321 | A | G | 0.14 | 0.24  | 0.01 | 7.65E-47  |
| RHOC    | rs1006298   | 1  | 112519337 | C | G | 0.48 | 0.08  | 0.01 | 1.73E-12  |
| RHOC    | rs1354034   | 3  | 56815721  | C | T | 0.60 | 0.06  | 0.01 | 9.28E-08  |
| RHOC    | rs342293    | 7  | 106731773 | G | C | 0.46 | -0.05 | 0.01 | 7.77E-06  |
| RILP    | rs1354034   | 3  | 56815721  | C | T | 0.60 | 0.08  | 0.01 | 1.63E-12  |
| RILP    | rs6993770   | 8  | 105569300 | T | A | 0.29 | -0.07 | 0.01 | 3.04E-08  |
| RILP    | rs58932608  | 11 | 265602    | G | A | 0.25 | 0.06  | 0.01 | 1.64E-05  |
| RILP    | rs183827902 | 17 | 1649225   | T | C | 0.02 | 0.26  | 0.03 | 4.03E-09  |
| RNASE3  | rs28498283  | 2  | 43132926  | T | A | 0.25 | 0.06  | 0.01 | 3.15E-06  |
| RNASE3  | rs75004383  | 2  | 64859095  | A | G | 0.04 | 0.13  | 0.02 | 1.03E-05  |
| RNASE3  | rs10208293  | 2  | 102349850 | A | G | 0.28 | -0.05 | 0.01 | 2.07E-05  |
| RNASE3  | rs9269219   | 6  | 32482556  | C | T | 0.58 | 0.05  | 0.01 | 1.17E-05  |
| RNASE3  | -           | 9  | 6152128   | C | A | 0.32 | 0.06  | 0.01 | 5.30E-06  |
| RNASE3  | rs147307766 | 14 | 20917832  | T | C | 0.05 | 0.56  | 0.02 | 1.31E-111 |
| RNASET2 | rs61747728  | 1  | 179557079 | T | C | 0.04 | 0.13  | 0.02 | 2.36E-06  |
| RNASET2 | rs751785721 | 1  | 182160297 | T | A | 0.33 | -0.05 | 0.01 | 4.83E-06  |
| RNASET2 | rs56193304  | 2  | 202779814 | G | T | 0.14 | 0.07  | 0.01 | 6.72E-06  |
| RNASET2 | rs13107325  | 4  | 102267552 | T | C | 0.08 | 0.12  | 0.01 | 8.41E-09  |
| RNASET2 | rs6914950   | 6  | 32622587  | T | C | 0.15 | 0.26  | 0.01 | 8.83E-64  |
| RNASET2 | rs3756838   | 6  | 166957763 | A | G | 0.21 | 0.46  | 0.01 | 1.22E-259 |
| RNASET2 | rs2721961   | 8  | 115645684 | G | T | 0.28 | 0.05  | 0.01 | 1.76E-05  |
| RNASET2 | rs12359178  | 10 | 17847614  | A | G | 0.14 | 0.07  | 0.01 | 1.40E-06  |
| RNASET2 | rs149871778 | 12 | 8946399   | C | G | 0.10 | 0.09  | 0.01 | 3.55E-07  |
| RNASET2 | rs11111026  | 12 | 101799025 | T | G | 0.18 | -0.17 | 0.01 | 1.83E-37  |
| RNASET2 | rs111338191 | 12 | 111388673 | T | A | 0.52 | -0.06 | 0.01 | 3.07E-09  |
| RNASET2 | rs145078947 | 14 | 93186629  | T | G | 0.00 | 1.32  | 0.07 | 3.30E-39  |
| ROBO1   | rs12752838  | 1  | 8853597   | G | A | 0.51 | 0.06  | 0.01 | 2.58E-07  |

|       |             |    |           |   |   |      |       |      |           |
|-------|-------------|----|-----------|---|---|------|-------|------|-----------|
| ROBO1 | -           | 1  | 161676997 | A | C | 0.08 | 0.09  | 0.01 | 1.78E-05  |
| ROBO1 | -           | 1  | 199025567 | T | A | 0.73 | 0.08  | 0.01 | 1.01E-10  |
| ROBO1 | rs3773244   | 3  | 78735620  | A | G | 0.20 | 0.23  | 0.01 | 2.16E-62  |
| ROBO1 | rs10935478  | 3  | 98709311  | T | C | 0.44 | -0.06 | 0.01 | 3.94E-07  |
| ROBO1 | rs3849768   | 5  | 39418785  | A | C | 0.21 | 0.06  | 0.01 | 3.79E-06  |
| ROBO1 | rs9271325   | 6  | 32614736  | G | C | 0.47 | -0.08 | 0.01 | 3.01E-13  |
| ROBO1 | rs9987289   | 8  | 9325848   | G | A | 0.91 | -0.08 | 0.01 | 2.18E-05  |
| ROBO1 | -           | 9  | 133255468 | T | G | 0.06 | 0.15  | 0.02 | 5.33E-10  |
| ROBO1 | rs56278466  | 10 | 17833858  | G | T | 0.66 | 0.12  | 0.01 | 7.82E-25  |
| ROBO1 | -           | 11 | 61774534  | G | A | 0.35 | 0.05  | 0.01 | 1.91E-05  |
| ROBO1 | rs111338191 | 12 | 111388673 | T | A | 0.52 | -0.06 | 0.01 | 9.55E-08  |
| ROBO1 | rs186021206 | 17 | 7166093   | A | G | 0.01 | 0.67  | 0.05 | 1.20E-18  |
| ROBO1 | rs77542162  | 17 | 69085137  | G | A | 0.02 | 0.19  | 0.02 | 5.62E-07  |
| ROBO2 | rs775722    | 3  | 77594465  | C | T | 0.45 | -0.11 | 0.01 | 1.61E-22  |
| ROBO2 | rs67370636  | 6  | 32556186  | T | C | 0.33 | 0.08  | 0.01 | 2.14E-10  |
| ROBO2 | rs6984305   | 8  | 9320758   | T | A | 0.89 | -0.10 | 0.01 | 1.41E-09  |
| ROBO2 | rs56278466  | 10 | 17833858  | G | T | 0.66 | 0.06  | 0.01 | 1.37E-07  |
| ROBO2 | rs186021206 | 17 | 7166093   | A | G | 0.01 | 0.49  | 0.05 | 1.79E-11  |
| ROBO2 | rs77542162  | 17 | 69085137  | G | A | 0.02 | 0.15  | 0.02 | 2.57E-05  |
| ROR1  | rs7532110   | 1  | 47496292  | A | T | 0.80 | 0.07  | 0.01 | 2.61E-06  |
| ROR1  | rs6588083   | 1  | 64148328  | C | T | 0.17 | -0.39 | 0.01 | 3.86E-155 |
| ROR1  | rs150816167 | 1  | 179602727 | C | T | 0.04 | 0.20  | 0.02 | 6.10E-13  |
| ROR1  | rs1260326   | 2  | 27508073  | C | T | 0.61 | 0.06  | 0.01 | 4.94E-08  |
| ROR1  | rs75166367  | 2  | 162107791 | A | G | 0.06 | -0.10 | 0.01 | 8.22E-06  |
| ROR1  | rs13107325  | 4  | 102267552 | T | C | 0.08 | 0.10  | 0.01 | 3.57E-06  |
| ROR1  | rs111239279 | 7  | 155877481 | C | T | 0.02 | -0.18 | 0.03 | 1.01E-05  |
| ROR1  | rs2298475   | 11 | 126408308 | C | T | 0.07 | -0.10 | 0.01 | 1.80E-06  |
| ROR1  | rs77924615  | 16 | 20381010  | A | G | 0.20 | -0.08 | 0.01 | 1.68E-08  |
| ROR1  | rs186021206 | 17 | 7166093   | A | G | 0.01 | 0.46  | 0.05 | 5.46E-10  |
| ROR1  | rs2659005   | 17 | 81244914  | T | C | 0.44 | 0.06  | 0.01 | 6.37E-09  |
| ROR1  | rs33950747  | 19 | 35848345  | T | C | 0.08 | 0.13  | 0.01 | 1.16E-10  |
| RP2   | rs6479457   | 9  | 93148226  | C | T | 0.25 | -0.06 | 0.01 | 2.11E-05  |
| RP2   | rs429358    | 19 | 44908684  | C | T | 0.16 | 0.14  | 0.01 | 2.59E-18  |
| RRM2  | -           | 6  | 32643672  | G | T | 0.18 | -0.08 | 0.01 | 1.48E-06  |
| RRM2  | rs111338191 | 12 | 111388673 | T | A | 0.52 | -0.06 | 0.01 | 2.44E-06  |
| RRM2  | rs7247412   | 19 | 51810615  | C | T | 0.27 | -0.07 | 0.01 | 9.08E-07  |
| RRM2B | rs1354034   | 3  | 56815721  | C | T | 0.60 | 0.09  | 0.01 | 1.89E-14  |
| RRM2B | rs5893603   | 8  | 102238611 | G | C | 0.08 | 0.19  | 0.01 | 8.35E-19  |
| RRM2B | -           | 10 | 63156270  | A | T | 0.49 | 0.06  | 0.01 | 1.75E-06  |
| RRM2B | rs544626513 | 11 | 180302    | C | G | 0.23 | 0.06  | 0.01 | 2.02E-05  |
| RSPO1 | rs36043533  | 1  | 37613845  | G | T | 0.06 | 0.47  | 0.02 | 4.15E-86  |
| RSPO1 | rs13412535  | 2  | 224010157 | A | G | 0.23 | -0.06 | 0.01 | 7.48E-06  |
| RSPO1 | rs11130124  | 3  | 47250693  | C | T | 0.59 | -0.05 | 0.01 | 2.57E-05  |
| RSPO1 | rs1354034   | 3  | 56815721  | C | T | 0.60 | -0.06 | 0.01 | 3.69E-07  |
| RSPO1 | rs6993770   | 8  | 105569300 | T | A | 0.29 | -0.09 | 0.01 | 1.25E-12  |
| RSPO1 | rs61469632  | 9  | 132986603 | C | T | 0.06 | -0.11 | 0.01 | 5.68E-06  |
| RSPO1 | rs3184504   | 12 | 111446804 | C | T | 0.52 | -0.06 | 0.01 | 5.90E-09  |
| RSPO1 | rs12445050  | 16 | 81837364  | T | C | 0.14 | 0.08  | 0.01 | 3.46E-07  |
| RSPO1 | rs892090    | 19 | 55027704  | G | T | 0.83 | 0.10  | 0.01 | 2.76E-12  |
| RSPO1 | rs13651     | 20 | 45345439  | C | T | 0.51 | -0.09 | 0.01 | 1.31E-14  |
| RSPO3 | rs1936800   | 6  | 127114919 | T | C | 0.53 | 0.16  | 0.01 | 1.88E-49  |
| RSPO3 | rs11751347  | 6  | 160671406 | T | C | 0.10 | -0.12 | 0.01 | 1.20E-11  |
| RSPO3 | rs6993770   | 8  | 105569300 | T | A | 0.29 | -0.06 | 0.01 | 1.88E-07  |
| RSPO3 | rs9543413   | 13 | 73609701  | C | T | 0.56 | 0.05  | 0.01 | 1.34E-05  |
| RSPO3 | rs8050794   | 16 | 3693045   | C | T | 0.70 | 0.06  | 0.01 | 6.00E-08  |
| RSPO3 | rs77924615  | 16 | 20381010  | A | G | 0.20 | -0.06 | 0.01 | 2.40E-06  |

|         |             |    |           |   |   |      |       |      |           |
|---------|-------------|----|-----------|---|---|------|-------|------|-----------|
| RSPO3   | rs892090    | 19 | 55027704  | G | T | 0.83 | 0.08  | 0.01 | 1.21E-07  |
| RSPO3   | rs2741454   | 20 | 45345679  | T | C | 0.50 | -0.06 | 0.01 | 3.43E-08  |
| RTBDN   | rs7687767   | 4  | 56958766  | G | A | 0.18 | 0.07  | 0.01 | 3.25E-06  |
| RTBDN   | rs7255045   | 19 | 12821455  | A | G | 0.26 | -0.17 | 0.01 | 8.31E-43  |
| RTBDN   | rs1065853   | 19 | 44909976  | T | G | 0.08 | 0.09  | 0.01 | 1.44E-05  |
| RTN4R   | rs6658843   | 1  | 172429942 | C | G | 0.61 | -0.06 | 0.01 | 5.75E-08  |
| RTN4R   | rs1260326   | 2  | 27508073  | C | T | 0.61 | -0.06 | 0.01 | 4.59E-07  |
| RTN4R   | rs1047891   | 2  | 210675783 | A | C | 0.31 | 0.06  | 0.01 | 1.86E-07  |
| RTN4R   | rs7644541   | 3  | 136426924 | G | A | 0.77 | 0.06  | 0.01 | 7.71E-06  |
| RTN4R   | -           | 6  | 24429112  | C | T | 0.00 | -0.39 | 0.05 | 7.57E-06  |
| RTN4R   | rs4355646   | 6  | 32418777  | T | C | 0.40 | 0.05  | 0.01 | 2.51E-05  |
| RTN4R   | rs1461729   | 8  | 9329732   | G | A | 0.90 | -0.08 | 0.01 | 3.35E-06  |
| RTN4R   | rs28929474  | 14 | 94378610  | T | C | 0.02 | 0.31  | 0.02 | 1.05E-16  |
| RTN4R   | rs56332871  | 15 | 96171587  | A | C | 0.27 | 0.05  | 0.01 | 1.29E-05  |
| RTN4R   | rs1065853   | 19 | 44909976  | T | G | 0.08 | 0.12  | 0.01 | 2.03E-09  |
| RTN4R   | rs663353    | 22 | 20187189  | A | G | 0.75 | -0.30 | 0.01 | 8.55E-122 |
| RUVBL1  | rs6003229   | 22 | 22697904  | C | G | 0.41 | -0.24 | 0.01 | 5.70E-82  |
| RWDD1   | rs1354034   | 3  | 56815721  | C | T | 0.60 | 0.07  | 0.01 | 1.88E-10  |
| RWDD1   | rs147899431 | 6  | 116571518 | C | G | 0.04 | 0.30  | 0.02 | 3.59E-28  |
| RWDD1   | rs11502185  | 11 | 180258    | C | T | 0.26 | 0.06  | 0.01 | 2.34E-05  |
| RWDD1   | rs60822569  | 12 | 54323724  | C | T | 0.55 | 0.05  | 0.01 | 2.76E-06  |
| S100A11 | rs3122301   | 1  | 152038249 | A | T | 0.04 | 0.32  | 0.02 | 3.34E-32  |
| S100A11 | rs4632248   | 19 | 53821741  | T | G | 0.21 | 0.23  | 0.01 | 5.77E-62  |
| S100A12 | rs3014874   | 1  | 153365467 | A | G | 0.26 | -0.23 | 0.01 | 2.00E-77  |
| S100A12 | rs6992333   | 8  | 143919209 | G | A | 0.43 | 0.05  | 0.01 | 1.93E-05  |
| S100A12 | rs10982156  | 9  | 114325784 | A | T | 0.07 | 0.14  | 0.01 | 1.68E-09  |
| S100A12 | -           | 17 | 39988115  | T | A | 0.54 | -0.06 | 0.01 | 5.17E-08  |
| S100A12 | rs4632248   | 19 | 53821741  | T | G | 0.21 | 0.17  | 0.01 | 2.04E-34  |
| S100A16 | rs9700928   | 1  | 153612510 | C | A | 0.49 | -0.10 | 0.01 | 5.43E-18  |
| S100A16 | rs56398830  | 13 | 103049340 | A | G | 0.01 | -0.30 | 0.04 | 9.23E-08  |
| S100A16 | rs601338    | 19 | 48703417  | A | G | 0.51 | -0.08 | 0.01 | 2.01E-10  |
| S100A4  | rs34557489  | 1  | 153548238 | C | T | 0.05 | 0.36  | 0.02 | 1.53E-45  |
| S100A4  | rs6993770   | 8  | 105569300 | T | A | 0.29 | -0.06 | 0.01 | 1.05E-05  |
| S100A4  | rs150813342 | 9  | 132989126 | T | C | 0.01 | -0.35 | 0.04 | 3.78E-08  |
| S100A4  | rs3817621   | 19 | 12887391  | C | G | 0.24 | -0.06 | 0.01 | 2.43E-05  |
| S100A4  | rs892090    | 19 | 55027704  | G | T | 0.83 | 0.07  | 0.01 | 2.42E-05  |
| S100P   | rs28498283  | 2  | 43132926  | T | A | 0.25 | 0.07  | 0.01 | 1.90E-07  |
| S100P   | -           | 4  | 6685222   | T | G | 0.05 | -0.56 | 0.02 | 5.55E-107 |
| S100P   | rs7846314   | 8  | 60738272  | T | A | 0.19 | 0.08  | 0.01 | 8.88E-09  |
| S100P   | -           | 8  | 143956732 | T | C | 0.36 | 0.09  | 0.01 | 8.59E-13  |
| S100P   | rs6503533   | 17 | 40028327  | T | C | 0.62 | -0.06 | 0.01 | 1.47E-06  |
| S100P   | rs7412      | 19 | 44908822  | T | C | 0.08 | 0.19  | 0.01 | 3.37E-19  |
| S100P   | rs4632248   | 19 | 53821741  | T | G | 0.21 | 0.07  | 0.01 | 1.63E-06  |
| SAMD9L  | rs1354034   | 3  | 56815721  | C | T | 0.60 | 0.05  | 0.01 | 1.32E-05  |
| SAMD9L  | rs17165120  | 7  | 93147778  | C | A | 0.07 | -0.56 | 0.01 | 2.46E-143 |
| SCAMP3  | rs1142287   | 1  | 155260340 | T | C | 0.26 | -0.08 | 0.01 | 3.02E-10  |
| SCAMP3  | rs1354034   | 3  | 56815721  | C | T | 0.60 | 0.08  | 0.01 | 2.59E-13  |
| SCAMP3  | rs342293    | 7  | 106731773 | G | C | 0.46 | -0.06 | 0.01 | 5.38E-07  |
| SCAMP3  | rs6993770   | 8  | 105569300 | T | A | 0.29 | -0.06 | 0.01 | 7.90E-06  |
| SCARA5  | rs1260326   | 2  | 27508073  | C | T | 0.61 | 0.05  | 0.01 | 1.76E-05  |
| SCARA5  | rs73724776  | 6  | 18010537  | G | A | 0.05 | 0.11  | 0.02 | 5.49E-06  |
| SCARA5  | rs2726951   | 8  | 27948266  | T | C | 0.27 | -0.34 | 0.01 | 6.24E-175 |
| SCARA5  | rs8176719   | 9  | 133257521 | C | T | 0.34 | 0.10  | 0.01 | 2.79E-21  |
| SCARA5  | rs112771035 | 11 | 126355981 | G | C | 0.07 | -0.11 | 0.01 | 1.43E-08  |
| SCARA5  | rs597808    | 12 | 111535554 | G | A | 0.52 | 0.04  | 0.01 | 2.50E-05  |
| SCARA5  | rs186021206 | 17 | 7166093   | A | G | 0.01 | 0.38  | 0.05 | 1.11E-07  |

|         |             |    |           |   |   |      |       |      |           |
|---------|-------------|----|-----------|---|---|------|-------|------|-----------|
| SCARB1  | rs113075502 | 14 | 105891588 | A | G | 0.23 | 0.07  | 0.01 | 1.64E-05  |
| SCARB2  | rs10935473  | 3  | 98698056  | T | G | 0.44 | -0.05 | 0.01 | 3.27E-06  |
| SCARB2  | rs28563976  | 4  | 76176220  | C | A | 0.15 | -0.31 | 0.01 | 5.17E-97  |
| SCARB2  | rs1042133   | 6  | 33080829  | C | G | 0.16 | 0.08  | 0.01 | 9.05E-08  |
| SCARB2  | rs13192569  | 6  | 122806452 | A | G | 0.14 | -0.07 | 0.01 | 8.28E-06  |
| SCARB2  | rs62018815  | 15 | 50766657  | A | G | 0.03 | -0.21 | 0.02 | 1.72E-10  |
| SCARF1  | rs3811444   | 1  | 247876149 | T | C | 0.33 | -0.05 | 0.01 | 6.06E-06  |
| SCARF1  | rs342298    | 7  | 106733200 | T | C | 0.46 | -0.05 | 0.01 | 1.62E-05  |
| SCARF1  | rs6993770   | 8  | 105569300 | T | A | 0.29 | -0.12 | 0.01 | 2.61E-23  |
| SCARF1  | -           | 9  | 4773337   | C | T | 0.54 | -0.05 | 0.01 | 6.76E-06  |
| SCARF1  | rs579459    | 9  | 133278724 | C | T | 0.21 | -0.06 | 0.01 | 4.27E-06  |
| SCARF1  | rs3184504   | 12 | 111446804 | C | T | 0.52 | -0.06 | 0.01 | 3.74E-09  |
| SCARF1  | rs2272011   | 17 | 1638896   | A | G | 0.59 | -0.38 | 0.01 | 5.78E-237 |
| SCARF1  | rs892090    | 19 | 55027704  | G | T | 0.83 | 0.08  | 0.01 | 1.91E-08  |
| SCARF2  | rs61747728  | 1  | 179557079 | T | C | 0.04 | 0.13  | 0.02 | 9.51E-07  |
| SCARF2  | rs1260326   | 2  | 27508073  | C | T | 0.61 | 0.04  | 0.01 | 1.55E-05  |
| SCARF2  | rs765335847 | 2  | 171568895 | A | T | 0.25 | 0.07  | 0.01 | 2.60E-09  |
| SCARF2  | rs507666    | 9  | 133273983 | A | G | 0.19 | -0.12 | 0.01 | 2.94E-22  |
| SCARF2  | rs4055121   | 11 | 126362442 | T | C | 0.14 | -0.08 | 0.01 | 6.58E-08  |
| SCARF2  | rs215225    | 12 | 481379    | G | A | 0.43 | 0.05  | 0.01 | 6.04E-08  |
| SCARF2  | rs77924615  | 16 | 20381010  | A | G | 0.20 | -0.06 | 0.01 | 3.49E-06  |
| SCARF2  | rs186021206 | 17 | 7166093   | A | G | 0.01 | 0.61  | 0.04 | 3.05E-20  |
| SCARF2  | rs9610447   | 22 | 20414601  | T | C | 0.75 | 0.34  | 0.01 | 2.39E-195 |
| SCG2    | rs665401    | 6  | 116936380 | C | T | 0.32 | -0.07 | 0.01 | 1.00E-07  |
| SCG2    | rs635634    | 9  | 133279427 | T | C | 0.18 | -0.07 | 0.01 | 2.07E-06  |
| SCG2    | rs77924615  | 16 | 20381010  | A | G | 0.20 | -0.07 | 0.01 | 1.71E-06  |
| SCG2    | rs681343    | 19 | 48703205  | T | C | 0.51 | 0.07  | 0.01 | 9.28E-10  |
| SCG3    | rs61804164  | 1  | 161653235 | C | G | 0.12 | 0.07  | 0.01 | 4.14E-06  |
| SCG3    | rs6798507   | 3  | 71497888  | A | G | 0.64 | 0.05  | 0.01 | 3.51E-07  |
| SCG3    | rs781657    | 4  | 56912519  | G | A | 0.18 | 0.11  | 0.01 | 5.54E-17  |
| SCG3    | -           | 5  | 134520666 | C | T | 0.42 | -0.05 | 0.01 | 1.09E-05  |
| SCG3    | rs111540411 | 6  | 26249389  | A | T | 0.37 | 0.05  | 0.01 | 1.03E-06  |
| SCG3    | rs3751198   | 12 | 103753429 | G | A | 0.60 | 0.06  | 0.01 | 1.21E-07  |
| SCG3    | rs2606134   | 15 | 51681453  | C | G | 0.76 | 0.70  | 0.01 | 0.00E+00  |
| SCG3    | rs186021206 | 17 | 7166093   | A | G | 0.01 | 0.43  | 0.04 | 3.92E-10  |
| SCGB1A1 | rs3765766   | 1  | 3718096   | C | T | 0.88 | -0.07 | 0.01 | 2.00E-05  |
| SCGB1A1 | rs761160638 | 2  | 8677620   | A | T | 0.08 | -0.11 | 0.01 | 3.87E-07  |
| SCGB1A1 | rs3856521   | 2  | 61178588  | A | G | 0.15 | -0.06 | 0.01 | 2.45E-05  |
| SCGB1A1 | rs9874923   | 3  | 20060071  | T | C | 0.42 | 0.05  | 0.01 | 1.34E-05  |
| SCGB1A1 | -           | 3  | 169161781 | G | C | 0.09 | -0.15 | 0.01 | 7.45E-16  |
| SCGB1A1 | rs1515498   | 3  | 189790513 | G | A | 0.36 | -0.10 | 0.01 | 9.09E-21  |
| SCGB1A1 | rs182548370 | 4  | 74794493  | A | C | 0.01 | 0.26  | 0.04 | 1.31E-05  |
| SCGB1A1 | -           | 5  | 1310990   | G | A | 0.57 | 0.05  | 0.01 | 6.85E-07  |
| SCGB1A1 | rs887373    | 5  | 127118033 | C | T | 0.50 | -0.05 | 0.01 | 6.24E-07  |
| SCGB1A1 | rs3210176   | 6  | 32660073  | C | T | 0.37 | -0.06 | 0.01 | 1.33E-06  |
| SCGB1A1 | rs7773147   | 6  | 73491411  | G | A | 0.68 | 0.05  | 0.01 | 8.04E-06  |
| SCGB1A1 | rs372203682 | 7  | 98174104  | T | A | 0.55 | -0.05 | 0.01 | 2.61E-05  |
| SCGB1A1 | rs7040029   | 9  | 114856934 | C | T | 0.71 | -0.05 | 0.01 | 1.19E-05  |
| SCGB1A1 | rs7072547   | 10 | 110222640 | A | G | 0.18 | -0.07 | 0.01 | 1.77E-06  |
| SCGB1A1 | rs10501135  | 11 | 34789633  | C | T | 0.41 | -0.14 | 0.01 | 3.46E-37  |
| SCGB1A1 | rs3741240   | 11 | 62419070  | A | G | 0.35 | -0.34 | 0.01 | 9.92E-193 |
| SCGB1A1 | rs7962469   | 12 | 51954475  | G | A | 0.65 | -0.09 | 0.01 | 1.60E-14  |
| SCGB1A1 | rs7963771   | 12 | 114905687 | T | C | 0.34 | -0.06 | 0.01 | 1.97E-06  |
| SCGB1A1 | rs1766143   | 14 | 36227136  | G | A | 0.31 | -0.06 | 0.01 | 4.99E-07  |
| SCGB1A1 | rs7182041   | 15 | 50014386  | C | A | 0.44 | 0.08  | 0.01 | 2.61E-14  |
| SCGB1A1 | rs55826010  | 17 | 45601827  | A | G | 0.24 | -0.07 | 0.01 | 1.17E-08  |

|         |             |    |           |   |   |      |       |      |          |
|---------|-------------|----|-----------|---|---|------|-------|------|----------|
| SCGB1A1 | rs1997814   | 20 | 10666023  | G | T | 0.68 | -0.06 | 0.01 | 5.98E-07 |
| SCGB3A2 | rs72691756  | 1  | 117574557 | A | G | 0.12 | 0.19  | 0.01 | 1.03E-27 |
| SCGB3A2 | rs56241824  | 2  | 9929198   | A | G | 0.37 | 0.06  | 0.01 | 1.52E-06 |
| SCGB3A2 | rs58235267  | 2  | 63050708  | G | C | 0.49 | -0.07 | 0.01 | 8.09E-11 |
| SCGB3A2 | rs1515498   | 3  | 189790513 | G | A | 0.36 | -0.13 | 0.01 | 6.67E-30 |
| SCGB3A2 | rs17717320  | 5  | 147826351 | G | C | 0.20 | -0.25 | 0.01 | 3.33E-70 |
| SCGB3A2 | rs9350191   | 6  | 19842430  | T | C | 0.85 | -0.09 | 0.01 | 4.90E-08 |
| SCGB3A2 | rs6927418   | 6  | 24827684  | T | C | 0.56 | -0.05 | 0.01 | 5.47E-06 |
| SCGB3A2 | rs62405419  | 6  | 50819746  | T | G | 0.12 | -0.08 | 0.01 | 2.21E-05 |
| SCGB3A2 | rs12666406  | 7  | 98161679  | A | G | 0.54 | -0.06 | 0.01 | 1.89E-08 |
| SCGB3A2 | -           | 8  | 70993166  | A | T | 0.08 | -0.09 | 0.01 | 1.25E-05 |
| SCGB3A2 | rs12570742  | 10 | 973374    | T | C | 0.52 | -0.06 | 0.01 | 1.27E-07 |
| SCGB3A2 | rs11499809  | 11 | 34769196  | T | C | 0.41 | 0.06  | 0.01 | 4.63E-08 |
| SCGB3A2 | rs3741240   | 11 | 62419070  | A | G | 0.35 | 0.14  | 0.01 | 3.43E-32 |
| SCGB3A2 | rs7962469   | 12 | 51954475  | G | A | 0.65 | -0.09 | 0.01 | 5.75E-16 |
| SCGB3A2 | -           | 14 | 36790980  | A | T | 0.19 | -0.07 | 0.01 | 5.11E-07 |
| SCGB3A2 | rs2414000   | 15 | 50020271  | G | T | 0.43 | 0.06  | 0.01 | 6.43E-07 |
| SCGB3A2 | rs173539    | 16 | 56954132  | T | C | 0.33 | 0.06  | 0.01 | 9.55E-08 |
| SCGB3A2 | rs756719    | 16 | 72933464  | T | C | 0.28 | -0.05 | 0.01 | 2.01E-05 |
| SCGB3A2 | rs1572053   | 20 | 46898021  | G | A | 0.62 | 0.05  | 0.01 | 2.65E-05 |
| SCGB3A2 | -           | 21 | 34694224  | C | G | 0.20 | -0.07 | 0.01 | 4.79E-07 |
| SCGB3A2 | rs12167717  | 22 | 19839117  | A | G | 0.24 | -0.07 | 0.01 | 7.72E-08 |
| SCGN    | rs6859236   | 5  | 151156083 | A | G | 0.51 | -0.10 | 0.01 | 1.77E-19 |
| SCGN    | rs10946788  | 6  | 25660282  | A | G | 0.28 | -0.09 | 0.01 | 1.33E-12 |
| SCGN    | rs13253288  | 8  | 58426297  | C | G | 0.66 | 0.06  | 0.01 | 1.05E-06 |
| SCGN    | rs782134971 | 9  | 133264504 | G | C | 0.25 | -0.07 | 0.01 | 9.64E-07 |
| SCGN    | rs11043076  | 11 | 2202244   | T | C | 0.13 | 0.09  | 0.01 | 7.91E-08 |
| SCGN    | rs601338    | 19 | 48703417  | A | G | 0.51 | -0.13 | 0.01 | 1.63E-31 |
| SCLY    | rs62196005  | 2  | 238098489 | T | A | 0.27 | 0.19  | 0.01 | 1.27E-56 |
| SCLY    | rs4835265   | 4  | 145900258 | A | C | 0.16 | 0.07  | 0.01 | 1.55E-06 |
| SCLY    | rs10733608  | 9  | 114386150 | T | G | 0.49 | -0.05 | 0.01 | 2.07E-05 |
| SCLY    | rs10883451  | 10 | 100164661 | C | T | 0.50 | -0.05 | 0.01 | 2.95E-06 |
| SCLY    | rs58964858  | 11 | 94082917  | T | C | 0.11 | -0.09 | 0.01 | 1.16E-06 |
| SCLY    | rs112635299 | 14 | 94371805  | T | G | 0.02 | 0.17  | 0.02 | 1.08E-05 |
| SCLY    | rs3747207   | 22 | 43928975  | A | G | 0.22 | 0.07  | 0.01 | 5.30E-08 |
| SCP2    | rs17200109  | 6  | 31410340  | T | C | 0.06 | -0.11 | 0.02 | 1.45E-05 |
| SCRN1   | rs1434282   | 1  | 199041592 | T | C | 0.73 | 0.09  | 0.01 | 8.85E-13 |
| SCRN1   | rs17324153  | 7  | 29926525  | C | T | 0.04 | 0.27  | 0.02 | 2.38E-21 |
| SDC1    | rs907866    | 2  | 20171619  | A | G | 0.45 | 0.13  | 0.01 | 7.61E-32 |
| SDC1    | rs1260326   | 2  | 27508073  | C | T | 0.61 | 0.07  | 0.01 | 2.06E-10 |
| SDC1    | rs895893    | 3  | 136236762 | T | C | 0.77 | 0.06  | 0.01 | 2.70E-05 |
| SDC1    | rs13107325  | 4  | 102267552 | T | C | 0.08 | 0.33  | 0.01 | 3.02E-57 |
| SDC1    | rs28522260  | 7  | 1144328   | A | C | 0.17 | -0.07 | 0.01 | 1.59E-06 |
| SDC1    | rs1461729   | 8  | 9329732   | G | A | 0.90 | -0.11 | 0.01 | 7.06E-09 |
| SDC1    | rs17409194  | 8  | 19679679  | G | A | 0.42 | -0.05 | 0.01 | 2.29E-05 |
| SDC1    | -           | 8  | 133585751 | A | C | 0.22 | 0.10  | 0.01 | 1.41E-14 |
| SDC1    | rs532436    | 9  | 133274414 | A | G | 0.19 | -0.11 | 0.01 | 1.04E-13 |
| SDC1    | rs11438680  | 10 | 63414938  | A | G | 0.46 | 0.06  | 0.01 | 4.38E-08 |
| SDC1    | rs186021206 | 17 | 7166093   | A | G | 0.01 | 0.67  | 0.05 | 7.97E-19 |
| SDC1    | rs2204211   | 17 | 49196605  | A | G | 0.10 | 0.09  | 0.01 | 4.25E-07 |
| SDC1    | rs620982    | 18 | 32223308  | C | T | 0.46 | -0.07 | 0.01 | 3.15E-11 |
| SDC1    | rs601338    | 19 | 48703417  | A | G | 0.51 | 0.07  | 0.01 | 4.15E-11 |
| SDC1    | rs2294915   | 22 | 43945024  | T | C | 0.23 | 0.06  | 0.01 | 1.57E-05 |
| SDC4    | rs6662263   | 1  | 171975102 | G | A | 0.80 | 0.07  | 0.01 | 1.45E-06 |
| SDC4    | rs1354034   | 3  | 56815721  | C | T | 0.60 | -0.08 | 0.01 | 7.89E-12 |
| SDC4    | -           | 5  | 132328823 | T | A | 0.63 | -0.06 | 0.01 | 2.97E-06 |

|        |             |    |           |   |   |      |       |      |           |
|--------|-------------|----|-----------|---|---|------|-------|------|-----------|
| SDC4   | rs2735095   | 6  | 29947989  | A | C | 0.32 | -0.09 | 0.01 | 9.01E-13  |
| SDC4   | rs778641135 | 6  | 135097494 | T | C | 0.26 | 0.06  | 0.01 | 7.68E-06  |
| SDC4   | rs61177759  | 6  | 139526156 | T | C | 0.20 | -0.06 | 0.01 | 1.28E-05  |
| SDC4   | rs11763765  | 7  | 1020874   | T | C | 0.15 | -0.17 | 0.01 | 6.24E-28  |
| SDC4   | rs139141690 | 7  | 101856650 | A | G | 0.00 | -0.44 | 0.05 | 1.05E-07  |
| SDC4   | rs6993770   | 8  | 105569300 | T | A | 0.29 | -0.12 | 0.01 | 1.55E-22  |
| SDC4   | rs385893    | 9  | 4763176   | C | T | 0.52 | 0.09  | 0.01 | 6.83E-15  |
| SDC4   | rs61750929  | 9  | 88880220  | T | C | 0.06 | -0.11 | 0.02 | 4.35E-06  |
| SDC4   | rs7861658   | 9  | 97917672  | G | A | 0.36 | 0.05  | 0.01 | 1.30E-05  |
| SDC4   | rs4962034   | 9  | 132991261 | G | C | 0.61 | -0.05 | 0.01 | 4.47E-06  |
| SDC4   | rs58641111  | 10 | 80485200  | T | C | 0.47 | -0.08 | 0.01 | 4.16E-13  |
| SDC4   | rs12762934  | 10 | 102600127 | T | C | 0.32 | 0.10  | 0.01 | 1.09E-17  |
| SDC4   | rs33972805  | 11 | 126418977 | T | C | 0.53 | -0.05 | 0.01 | 2.65E-06  |
| SDC4   | rs11553699  | 12 | 121779004 | G | A | 0.14 | 0.17  | 0.01 | 1.25E-22  |
| SDC4   | rs12881760  | 14 | 100709998 | C | G | 0.67 | 0.05  | 0.01 | 8.05E-06  |
| SDC4   | rs34890846  | 16 | 8947636   | G | A | 0.19 | -0.07 | 0.01 | 7.63E-07  |
| SDC4   | rs4783186   | 16 | 85382128  | C | T | 0.87 | -0.08 | 0.01 | 4.70E-06  |
| SDC4   | rs7198986   | 16 | 88478414  | G | C | 0.35 | -0.05 | 0.01 | 2.55E-05  |
| SDC4   | rs1654425   | 19 | 55027612  | C | T | 0.83 | 0.08  | 0.01 | 4.98E-07  |
| SDC4   | rs4355178   | 20 | 1950227   | A | G | 0.26 | -0.06 | 0.01 | 6.35E-07  |
| SDC4   | rs2251577   | 20 | 45345931  | C | G | 0.51 | -0.22 | 0.01 | 6.35E-87  |
| SDC4   | rs2229742   | 21 | 14966851  | C | G | 0.10 | 0.08  | 0.01 | 8.15E-06  |
| SELE   | rs1277930   | 1  | 109279521 | A | G | 0.77 | 0.07  | 0.01 | 1.69E-09  |
| SELE   | rs4987388   | 1  | 169689445 | G | A | 0.71 | -0.10 | 0.01 | 2.51E-20  |
| SELE   | rs10935473  | 3  | 98698056  | T | G | 0.44 | -0.09 | 0.01 | 2.03E-19  |
| SELE   | rs13135092  | 4  | 102276925 | G | A | 0.08 | 0.08  | 0.01 | 5.86E-06  |
| SELE   | rs2519093   | 9  | 133266456 | T | C | 0.18 | -0.97 | 0.01 | 0.00E+00  |
| SELE   | -           | 9  | 137036493 | A | G | 0.64 | -0.07 | 0.01 | 8.84E-10  |
| SELE   | rs35166255  | 11 | 126431861 | A | G | 0.03 | 0.32  | 0.02 | 2.19E-35  |
| SELE   | rs7979473   | 12 | 120982457 | G | A | 0.62 | -0.05 | 0.01 | 3.96E-08  |
| SELE   | rs186021206 | 17 | 7166093   | A | G | 0.01 | 0.59  | 0.04 | 2.05E-19  |
| SELE   | rs17855739  | 19 | 5831829   | T | C | 0.04 | 0.17  | 0.02 | 5.25E-13  |
| SELP   | rs6136      | 1  | 169594713 | G | T | 0.11 | -0.40 | 0.01 | 4.91E-114 |
| SELP   | rs56043070  | 1  | 247556467 | A | G | 0.07 | 0.11  | 0.01 | 3.82E-07  |
| SELP   | rs11242109  | 5  | 132341354 | T | G | 0.48 | -0.06 | 0.01 | 3.36E-08  |
| SELP   | rs6961069   | 7  | 80589645  | T | C | 0.40 | 0.06  | 0.01 | 1.59E-06  |
| SELP   | rs6993770   | 8  | 105569300 | T | A | 0.29 | -0.11 | 0.01 | 2.25E-20  |
| SELP   | rs385893    | 9  | 4763176   | C | T | 0.52 | 0.05  | 0.01 | 1.69E-05  |
| SELP   | rs2519093   | 9  | 133266456 | T | C | 0.18 | -0.22 | 0.01 | 2.55E-51  |
| SELP   | rs7896518   | 10 | 63344740  | G | A | 0.42 | 0.07  | 0.01 | 1.37E-10  |
| SELP   | rs12445050  | 16 | 81837364  | T | C | 0.14 | 0.10  | 0.01 | 4.20E-10  |
| SELP   | rs892090    | 19 | 55027704  | G | T | 0.83 | 0.14  | 0.01 | 4.68E-20  |
| SELPLG | rs343808    | 1  | 110787385 | T | C | 0.24 | -0.07 | 0.01 | 1.17E-08  |
| SELPLG | rs2990223   | 1  | 155215184 | G | A | 0.60 | 0.14  | 0.01 | 8.50E-39  |
| SELPLG | rs10214273  | 5  | 35883884  | G | T | 0.27 | -0.07 | 0.01 | 2.19E-08  |
| SELPLG | rs4248814   | 6  | 31378978  | A | G | 0.20 | 0.07  | 0.01 | 4.01E-08  |
| SELPLG | rs10093797  | 8  | 78660478  | A | C | 0.75 | -0.06 | 0.01 | 6.03E-06  |
| SELPLG | rs2142306   | 8  | 133458388 | C | T | 0.41 | 0.05  | 0.01 | 4.67E-06  |
| SELPLG | rs536644    | 9  | 76530872  | A | G | 0.55 | 0.10  | 0.01 | 3.00E-20  |
| SELPLG | rs10819317  | 9  | 127906678 | G | A | 0.17 | 0.10  | 0.01 | 2.06E-11  |
| SELPLG | rs7294337   | 12 | 108618918 | T | C | 0.02 | -1.97 | 0.03 | 0.00E+00  |
| SELPLG | rs60005225  | 17 | 40011875  | T | G | 0.38 | -0.05 | 0.01 | 6.78E-06  |
| SELPLG | rs1840828   | 19 | 16331801  | T | C | 0.61 | -0.05 | 0.01 | 1.89E-05  |
| SELPLG | rs28823595  | 20 | 3724486   | A | G | 0.09 | 0.08  | 0.01 | 2.44E-05  |
| SEMA3F | rs554375669 | 3  | 50143912  | T | C | 0.21 | -0.17 | 0.01 | 5.19E-32  |
| SEMA3F | rs4679317   | 3  | 126969428 | A | G | 0.69 | -0.07 | 0.01 | 1.45E-09  |

|           |             |    |           |   |   |      |       |      |          |
|-----------|-------------|----|-----------|---|---|------|-------|------|----------|
| SEMA3F    | rs507666    | 9  | 133273983 | A | G | 0.18 | -0.08 | 0.01 | 1.76E-08 |
| SEMA3F    | rs564699    | 11 | 89467705  | T | C | 0.54 | -0.06 | 0.01 | 1.77E-08 |
| SEMA3F    | rs3184504   | 12 | 111446804 | C | T | 0.52 | -0.06 | 0.01 | 4.03E-08 |
| SEMA3F    | rs1037117   | 15 | 101528455 | A | G | 0.25 | 0.06  | 0.01 | 1.00E-06 |
| SEMA3F    | rs8055162   | 16 | 89648874  | A | G | 0.57 | -0.06 | 0.01 | 3.84E-08 |
| SEMA4C    | rs756513821 | 2  | 95553269  | G | A | 0.00 | -1.00 | 0.12 | 2.88E-07 |
| SEMA4C    | rs537675308 | 2  | 99768494  | C | G | 0.00 | -0.84 | 0.12 | 1.00E-05 |
| SEMA4C    | rs34794906  | 6  | 31270081  | C | T | 0.26 | 0.06  | 0.01 | 1.97E-06 |
| SEMA4C    | rs2519093   | 9  | 133266456 | T | C | 0.18 | -0.26 | 0.01 | 7.53E-73 |
| SEMA4C    | rs564699    | 11 | 89467705  | T | C | 0.54 | -0.06 | 0.01 | 1.28E-06 |
| SEMA4C    | rs186021206 | 17 | 7166093   | A | G | 0.01 | 0.49  | 0.05 | 3.38E-10 |
| SEMA4C    | rs909692    | 22 | 50272204  | G | C | 0.39 | 0.05  | 0.01 | 1.50E-05 |
| SEMA4D    | rs1354034   | 3  | 56815721  | C | T | 0.60 | 0.10  | 0.01 | 1.73E-18 |
| SEMA4D    | rs6993770   | 8  | 105569300 | T | A | 0.29 | -0.05 | 0.01 | 2.36E-05 |
| SEMA4D    | rs409801    | 9  | 4744743   | C | T | 0.51 | 0.05  | 0.01 | 2.45E-05 |
| SEMA4D    | rs36020742  | 9  | 89436540  | T | C | 0.18 | 0.10  | 0.01 | 1.70E-12 |
| SEMA4D    | rs7080386   | 10 | 63288546  | A | C | 0.41 | 0.05  | 0.01 | 5.36E-06 |
| SEMA4D    | rs7949566   | 11 | 126415406 | A | G | 0.42 | 0.07  | 0.01 | 2.60E-08 |
| SEMA4D    | rs111338191 | 12 | 111388673 | T | A | 0.52 | -0.09 | 0.01 | 3.13E-15 |
| SEMA7A    | rs61801010  | 1  | 161572445 | G | A | 0.11 | 0.09  | 0.01 | 2.27E-06 |
| SEMA7A    | rs7606173   | 2  | 60498316  | C | G | 0.43 | -0.06 | 0.01 | 2.59E-08 |
| SEMA7A    | rs3864106   | 3  | 186938813 | C | G | 0.58 | -0.18 | 0.01 | 5.82E-61 |
| SEMA7A    | rs28716466  | 4  | 207285    | C | T | 0.30 | 0.07  | 0.01 | 1.87E-08 |
| SEMA7A    | rs13135092  | 4  | 102276925 | G | A | 0.08 | 0.10  | 0.01 | 3.15E-06 |
| SEMA7A    | rs9263850   | 6  | 31188411  | G | A | 0.28 | 0.06  | 0.01 | 2.71E-06 |
| SEMA7A    | rs9489686   | 6  | 119328000 | G | A | 0.42 | -0.06 | 0.01 | 9.15E-08 |
| SEMA7A    | rs2347784   | 7  | 6485212   | G | C | 0.27 | -0.08 | 0.01 | 3.39E-11 |
| SEMA7A    | rs12554596  | 9  | 37002145  | G | A | 0.20 | -0.06 | 0.01 | 7.39E-06 |
| SEMA7A    | rs10793962  | 9  | 133253728 | T | A | 0.06 | 0.22  | 0.01 | 1.16E-22 |
| SEMA7A    | rs56278466  | 10 | 17833858  | G | T | 0.66 | 0.16  | 0.01 | 1.28E-43 |
| SEMA7A    | rs73119306  | 12 | 57433199  | G | A | 0.25 | 0.06  | 0.01 | 8.12E-06 |
| SEMA7A    | rs3184504   | 12 | 111446804 | C | T | 0.52 | -0.12 | 0.01 | 3.00E-26 |
| SEMA7A    | rs608394    | 12 | 120756250 | T | C | 0.51 | -0.08 | 0.01 | 6.96E-12 |
| SEMA7A    | rs78994380  | 15 | 74400071  | A | C | 0.11 | -0.23 | 0.01 | 1.27E-37 |
| SEMA7A    | rs200489612 | 17 | 7203059   | A | G | 0.01 | 0.68  | 0.05 | 1.33E-16 |
| SEMA7A    | rs34557412  | 17 | 16948873  | G | A | 0.01 | 0.56  | 0.04 | 6.15E-17 |
| SEMA7A    | rs485186    | 19 | 48703949  | G | A | 0.54 | 0.05  | 0.01 | 1.31E-05 |
| SEMA7A    | rs7258315   | 19 | 52904912  | C | G | 0.22 | -0.06 | 0.01 | 1.99E-05 |
| SEPTIN9   | rs55645755  | 17 | 77456611  | G | A | 0.02 | -0.37 | 0.03 | 5.29E-15 |
| SEPTIN9   | rs10432210  | 18 | 25281830  | T | C | 0.21 | 0.06  | 0.01 | 1.02E-05 |
| SERPINA11 | rs1260326   | 2  | 27508073  | C | T | 0.61 | -0.07 | 0.01 | 1.73E-13 |
| SERPINA11 | -           | 3  | 186624022 | C | A | 0.51 | 0.06  | 0.01 | 1.24E-10 |
| SERPINA11 | rs13108218  | 4  | 3442204   | G | A | 0.62 | -0.04 | 0.01 | 1.08E-05 |
| SERPINA11 | rs144861591 | 6  | 26072764  | T | C | 0.08 | -0.07 | 0.01 | 1.65E-05 |
| SERPINA11 | -           | 8  | 10718441  | A | T | 0.60 | 0.06  | 0.01 | 9.32E-10 |
| SERPINA11 | rs3999089   | 10 | 63444048  | G | A | 0.47 | 0.06  | 0.01 | 9.41E-11 |
| SERPINA11 | rs7139079   | 12 | 120977490 | A | G | 0.59 | -0.04 | 0.01 | 9.24E-07 |
| SERPINA11 | rs12898137  | 14 | 94444245  | A | T | 0.41 | -0.61 | 0.01 | 0.00E+00 |
| SERPINA11 | rs7188155   | 16 | 88460014  | G | C | 0.31 | 0.04  | 0.01 | 1.05E-05 |
| SERPINA11 | rs8105397   | 19 | 45894381  | G | A | 0.12 | -0.10 | 0.01 | 6.69E-13 |
| SERPINA12 | rs759945735 | 7  | 100056468 | T | A | 0.29 | -0.05 | 0.01 | 3.24E-07 |
| SERPINA12 | rs1495743   | 8  | 18415790  | C | G | 0.78 | -0.05 | 0.01 | 5.69E-06 |
| SERPINA12 | -           | 11 | 61853156  | A | C | 0.40 | -0.05 | 0.01 | 5.69E-06 |
| SERPINA12 | rs17091005  | 14 | 94522070  | C | T | 0.22 | 0.77  | 0.01 | 0.00E+00 |
| SERPINA12 | rs339969    | 15 | 60591082  | A | C | 0.62 | -0.10 | 0.01 | 7.98E-24 |
| SERPINA12 | rs72999033  | 19 | 19255823  | T | C | 0.06 | 0.09  | 0.01 | 3.74E-06 |



|           |             |    |           |   |   |      |       |      |          |
|-----------|-------------|----|-----------|---|---|------|-------|------|----------|
| SERPINA12 | rs738408    | 22 | 43928850  | T | C | 0.22 | 0.06  | 0.01 | 9.35E-07 |
| SERPINA9  | rs9264954   | 6  | 31307618  | A | G | 0.11 | 0.07  | 0.01 | 4.82E-06 |
| SERPINA9  | rs10849448  | 12 | 6384185   | G | A | 0.75 | -0.05 | 0.01 | 1.62E-05 |
| SERPINA9  | rs11850199  | 14 | 94476326  | A | C | 0.27 | -0.50 | 0.01 | 0.00E+00 |
| SERPINB1  | rs17622656  | 5  | 132485305 | A | G | 0.39 | -0.05 | 0.01 | 1.83E-05 |
| SERPINB1  | rs6925281   | 6  | 2815043   | T | C | 0.18 | 0.11  | 0.01 | 2.22E-12 |
| SERPINB1  | rs6993770   | 8  | 105569300 | T | A | 0.29 | -0.08 | 0.01 | 1.61E-10 |
| SERPINB5  | rs148729762 | 18 | 63493861  | A | C | 0.66 | 0.06  | 0.01 | 4.79E-06 |
| SERPINB6  | rs9405601   | 6  | 2972663   | A | G | 0.44 | 0.16  | 0.01 | 6.35E-46 |
| SERPINB6  | rs6993770   | 8  | 105569300 | T | A | 0.29 | -0.06 | 0.01 | 1.28E-06 |
| SERPINB8  | rs3826616   | 18 | 63987229  | G | A | 0.58 | -0.72 | 0.01 | 0.00E+00 |
| SERPINB8  | rs4632248   | 19 | 53821741  | T | G | 0.21 | 0.10  | 0.01 | 4.28E-19 |
| SERPINB9  | rs7751676   | 6  | 2931645   | T | C | 0.06 | 0.22  | 0.02 | 3.96E-21 |
| SERPINB9  | rs6993770   | 8  | 105569300 | T | A | 0.29 | -0.07 | 0.01 | 5.95E-08 |
| SERPINE1  | rs2274319   | 1  | 156481081 | C | T | 0.65 | -0.06 | 0.01 | 1.38E-06 |
| SERPINE1  | rs13412535  | 2  | 224010157 | A | G | 0.23 | -0.06 | 0.01 | 6.21E-06 |
| SERPINE1  | rs78909033  | 2  | 240571486 | A | G | 0.14 | -0.08 | 0.01 | 8.66E-07 |
| SERPINE1  | rs7618405   | 3  | 18209017  | A | C | 0.21 | -0.06 | 0.01 | 1.50E-05 |
| SERPINE1  | rs1354034   | 3  | 56815721  | C | T | 0.60 | -0.12 | 0.01 | 2.71E-25 |
| SERPINE1  | rs4698839   | 4  | 101880784 | T | C | 0.40 | -0.06 | 0.01 | 6.20E-07 |
| SERPINE1  | rs114694170 | 5  | 88884379  | C | T | 0.06 | 0.14  | 0.02 | 4.11E-09 |
| SERPINE1  | rs11242109  | 5  | 132341354 | T | G | 0.48 | -0.06 | 0.01 | 1.32E-06 |
| SERPINE1  | rs6961069   | 7  | 80589645  | T | C | 0.40 | 0.07  | 0.01 | 2.29E-08 |
| SERPINE1  | rs2227674   | 7  | 101132927 | G | A | 0.20 | -0.12 | 0.01 | 3.31E-16 |
| SERPINE1  | rs6993770   | 8  | 105569300 | T | A | 0.29 | -0.16 | 0.01 | 2.30E-38 |
| SERPINE1  | rs61469632  | 9  | 132986603 | C | T | 0.06 | -0.14 | 0.02 | 3.90E-09 |
| SERPINE1  | rs34377578  | 10 | 102576669 | C | A | 0.25 | 0.07  | 0.01 | 3.39E-08 |
| SERPINE1  | rs6580981   | 12 | 54329244  | A | G | 0.46 | 0.06  | 0.01 | 2.35E-08 |
| SERPINE1  | rs60128101  | 15 | 64868190  | A | T | 0.18 | 0.07  | 0.01 | 6.14E-06 |
| SERPINE1  | rs12445050  | 16 | 81837364  | T | C | 0.14 | 0.10  | 0.01 | 1.57E-09 |
| SERPINE1  | rs1654425   | 19 | 55027612  | C | T | 0.83 | 0.16  | 0.01 | 2.93E-26 |
| SERPINE1  | rs6081565   | 20 | 19307260  | A | G | 0.35 | 0.07  | 0.01 | 3.48E-09 |
| SESTD1    | rs10170520  | 2  | 179229886 | T | A | 0.33 | -0.10 | 0.01 | 1.77E-17 |
| SESTD1    | rs1354034   | 3  | 56815721  | C | T | 0.60 | 0.06  | 0.01 | 3.59E-06 |
| SESTD1    | rs10733789  | 10 | 63188924  | C | T | 0.31 | 0.06  | 0.01 | 9.58E-07 |
| SETMAR    | rs547990685 | 1  | 10631051  | G | C | 0.00 | 0.52  | 0.08 | 1.61E-05 |
| SETMAR    | rs35083095  | 3  | 4362134   | C | T | 0.49 | -0.22 | 0.01 | 5.37E-88 |
| SEZ6L     | rs61801010  | 1  | 161572445 | G | A | 0.11 | 0.10  | 0.01 | 9.61E-08 |
| SEZ6L     | rs781657    | 4  | 56912519  | G | A | 0.18 | 0.06  | 0.01 | 5.79E-06 |
| SEZ6L     | rs9269915   | 6  | 32583676  | T | G | 0.72 | 0.06  | 0.01 | 1.13E-06 |
| SEZ6L     | rs10838702  | 11 | 47389337  | T | G | 0.39 | 0.05  | 0.01 | 3.62E-06 |
| SEZ6L     | rs60194243  | 11 | 126377404 | T | C | 0.06 | -0.11 | 0.01 | 1.19E-06 |
| SEZ6L     | rs1070073   | 12 | 103606541 | G | T | 0.67 | 0.05  | 0.01 | 4.24E-06 |
| SEZ6L     | rs186021206 | 17 | 7166093   | A | G | 0.01 | 0.48  | 0.05 | 1.49E-10 |
| SEZ6L     | rs137203    | 22 | 26292865  | T | G | 0.02 | -0.56 | 0.03 | 2.43E-46 |
| SEZ6L2    | rs1260326   | 2  | 27508073  | C | T | 0.61 | 0.05  | 0.01 | 2.09E-05 |
| SEZ6L2    | rs1961950   | 4  | 56954651  | T | C | 0.09 | -0.18 | 0.01 | 9.18E-24 |
| SEZ6L2    | rs2523567   | 6  | 31362238  | G | C | 0.23 | -0.07 | 0.01 | 3.74E-09 |
| SEZ6L2    | rs56287412  | 7  | 17939205  | C | T | 0.51 | 0.05  | 0.01 | 1.61E-05 |
| SEZ6L2    | rs56278466  | 10 | 17833858  | G | T | 0.66 | 0.06  | 0.01 | 2.72E-07 |
| SEZ6L2    | rs12372718  | 12 | 50777307  | G | A | 0.41 | -0.08 | 0.01 | 4.56E-14 |
| SEZ6L2    | rs113443718 | 16 | 29880863  | A | G | 0.31 | 0.16  | 0.01 | 5.13E-48 |
| SEZ6L2    | rs186021206 | 17 | 7166093   | A | G | 0.01 | 0.66  | 0.05 | 1.42E-20 |
| SF3B4     | rs12078573  | 1  | 149931717 | A | G | 0.08 | -0.10 | 0.01 | 7.05E-06 |
| SF3B4     | rs10067881  | 5  | 95826771  | A | G | 0.13 | -0.11 | 0.01 | 6.14E-11 |
| SF3B4     | rs6993770   | 8  | 105569300 | T | A | 0.29 | -0.06 | 0.01 | 5.87E-07 |

|         |             |    |           |   |   |      |       |      |           |
|---------|-------------|----|-----------|---|---|------|-------|------|-----------|
| SF3B4   | rs3782123   | 11 | 205198    | A | C | 0.73 | 0.06  | 0.01 | 2.53E-05  |
| SFRP1   | rs2318761   | 1  | 150285304 | G | A | 0.47 | 0.05  | 0.01 | 1.26E-06  |
| SFRP1   | rs3189152   | 6  | 32666564  | G | A | 0.42 | -0.05 | 0.01 | 1.50E-05  |
| SFRP1   | rs72643819  | 8  | 41309674  | T | G | 0.39 | -0.19 | 0.01 | 2.48E-64  |
| SFRP1   | rs6420185   | 8  | 143220901 | A | G | 0.39 | -0.06 | 0.01 | 2.47E-08  |
| SFRP1   | -           | 9  | 133263362 | G | A | 0.18 | -0.12 | 0.01 | 6.03E-17  |
| SFRP1   | rs2741450   | 20 | 45346489  | A | T | 0.51 | -0.06 | 0.01 | 1.13E-08  |
| SFTPA1  | rs1965708   | 10 | 79557289  | T | G | 0.19 | -0.28 | 0.01 | 4.36E-81  |
| SFTPA2  | rs11675149  | 2  | 203076319 | A | C | 0.57 | -0.05 | 0.01 | 3.29E-06  |
| SFTPA2  | rs1004500   | 5  | 127132544 | A | G | 0.46 | 0.05  | 0.01 | 6.56E-07  |
| SFTPA2  | -           | 9  | 133255468 | T | G | 0.06 | 0.09  | 0.01 | 1.37E-05  |
| SFTPA2  | rs17886395  | 10 | 79558907  | G | C | 0.13 | 0.93  | 0.01 | 0.00E+00  |
| SFTPA2  | rs7962469   | 12 | 51954475  | G | A | 0.65 | 0.05  | 0.01 | 1.46E-06  |
| SFTPA2  | rs2753532   | 14 | 105893218 | C | T | 0.88 | -0.10 | 0.01 | 1.30E-08  |
| SFTPA2  | rs117981338 | 17 | 73092704  | T | C | 0.01 | 0.25  | 0.03 | 8.11E-09  |
| SFTPD   | rs2075571   | 1  | 155204315 | T | C | 0.42 | 0.04  | 0.01 | 3.04E-06  |
| SFTPD   | rs56218657  | 1  | 207096104 | A | G | 0.04 | -0.12 | 0.01 | 3.45E-07  |
| SFTPD   | rs751775696 | 4  | 57078846  | A | T | 0.53 | -0.05 | 0.01 | 1.43E-07  |
| SFTPD   | rs2464520   | 4  | 88929868  | G | C | 0.82 | -0.07 | 0.01 | 7.57E-10  |
| SFTPD   | -           | 5  | 95695443  | C | A | 0.55 | -0.04 | 0.01 | 1.70E-05  |
| SFTPD   | rs4262138   | 5  | 129986982 | T | A | 0.14 | 0.06  | 0.01 | 5.21E-07  |
| SFTPD   | rs62395441  | 6  | 31379437  | A | G | 0.06 | 0.69  | 0.01 | 1.53E-275 |
| SFTPD   | rs2451951   | 9  | 106734349 | C | T | 0.49 | -0.11 | 0.01 | 4.94E-37  |
| SFTPD   | rs721917    | 10 | 79946568  | G | A | 0.42 | -0.75 | 0.01 | 0.00E+00  |
| SFTPD   | rs35705950  | 11 | 1219991   | T | G | 0.11 | 0.07  | 0.01 | 2.61E-06  |
| SFTPD   | rs4767280   | 12 | 114926148 | T | C | 0.40 | 0.04  | 0.01 | 1.65E-05  |
| SFTPD   | rs111345531 | 13 | 109265867 | C | T | 0.26 | 0.04  | 0.01 | 2.71E-05  |
| SFTPD   | rs58462329  | 16 | 84370147  | C | G | 0.15 | -0.21 | 0.01 | 5.42E-67  |
| SFTPD   | rs199913382 | 17 | 46548500  | C | A | 0.22 | -0.06 | 0.01 | 1.98E-07  |
| SH2B3   | rs11950562  | 5  | 132316836 | C | A | 0.48 | -0.05 | 0.01 | 8.34E-06  |
| SH2B3   | rs342293    | 7  | 106731773 | G | C | 0.46 | -0.06 | 0.01 | 1.57E-07  |
| SH2B3   | rs6993770   | 8  | 105569300 | T | A | 0.29 | -0.09 | 0.01 | 5.91E-12  |
| SH2B3   | rs409801    | 9  | 4744743   | C | T | 0.51 | 0.05  | 0.01 | 1.48E-05  |
| SH2B3   | -           | 12 | 111473764 | G | A | 0.21 | -0.08 | 0.01 | 1.59E-08  |
| SH2D1A  | rs3184504   | 12 | 111446804 | C | T | 0.52 | -0.08 | 0.01 | 4.74E-12  |
| SH2D1A  | rs75763843  | 18 | 44482415  | C | A | 0.13 | 0.12  | 0.01 | 7.15E-13  |
| SHMT1   | rs1354034   | 3  | 56815721  | C | T | 0.60 | 0.05  | 0.01 | 1.30E-07  |
| SHMT1   | rs342296    | 7  | 106732457 | A | G | 0.46 | -0.05 | 0.01 | 6.13E-06  |
| SHMT1   | rs6993770   | 8  | 105569300 | T | A | 0.29 | -0.07 | 0.01 | 8.51E-12  |
| SHMT1   | rs60822569  | 12 | 54323724  | C | T | 0.55 | 0.04  | 0.01 | 2.10E-05  |
| SHMT1   | rs669340    | 17 | 18360643  | C | G | 0.63 | 0.71  | 0.01 | 0.00E+00  |
| SIAE    | rs114269697 | 1  | 64848529  | A | C | 0.01 | -0.23 | 0.03 | 6.65E-06  |
| SIAE    | rs6993770   | 8  | 105569300 | T | A | 0.29 | -0.06 | 0.01 | 3.15E-07  |
| SIAE    | rs56278466  | 10 | 17833858  | G | T | 0.66 | 0.08  | 0.01 | 7.95E-11  |
| SIAE    | rs9414801   | 10 | 63389329  | A | G | 0.53 | -0.09 | 0.01 | 8.76E-16  |
| SIAE    | rs78778622  | 11 | 124660768 | C | T | 0.06 | -0.44 | 0.02 | 1.27E-76  |
| SIAE    | rs2559850   | 12 | 101699681 | A | G | 0.59 | 0.07  | 0.01 | 4.10E-09  |
| SIAE    | rs3184504   | 12 | 111446804 | C | T | 0.52 | -0.05 | 0.01 | 1.12E-05  |
| SIAE    | rs72701845  | 14 | 92750678  | A | G | 0.04 | -0.15 | 0.02 | 9.70E-07  |
| SIAE    | rs892090    | 19 | 55027704  | G | T | 0.83 | 0.10  | 0.01 | 3.47E-10  |
| SIGLEC1 | rs17849502  | 1  | 183563445 | T | G | 0.05 | 0.11  | 0.02 | 3.50E-06  |
| SIGLEC1 | rs62165726  | 2  | 134208991 | A | C | 0.04 | -0.40 | 0.02 | 1.37E-46  |
| SIGLEC1 | rs2111485   | 2  | 162254026 | G | A | 0.61 | 0.05  | 0.01 | 1.46E-05  |
| SIGLEC1 | rs115216147 | 5  | 71369699  | A | T | 0.07 | 0.11  | 0.01 | 5.38E-07  |
| SIGLEC1 | rs11185602  | 7  | 50259481  | G | A | 0.33 | -0.06 | 0.01 | 1.24E-08  |
| SIGLEC1 | rs2031902   | 9  | 33117526  | T | C | 0.59 | -0.07 | 0.01 | 6.43E-10  |

|          |             |    |           |   |   |      |       |      |           |
|----------|-------------|----|-----------|---|---|------|-------|------|-----------|
| SIGLEC1  | rs6590207   | 11 | 126446130 | G | A | 0.29 | 0.09  | 0.01 | 8.67E-14  |
| SIGLEC1  | rs3184504   | 12 | 111446804 | C | T | 0.52 | -0.07 | 0.01 | 5.48E-11  |
| SIGLEC1  | rs186021206 | 17 | 7166093   | A | G | 0.01 | 1.32  | 0.05 | 6.36E-76  |
| SIGLEC1  | rs11668950  | 19 | 18172130  | A | G | 0.27 | 0.09  | 0.01 | 1.11E-13  |
| SIGLEC1  | rs189448562 | 20 | 3724468   | C | G | 0.01 | -1.83 | 0.04 | 7.01E-259 |
| SIGLEC10 | rs1257169   | 2  | 134206291 | A | C | 0.50 | -0.05 | 0.01 | 5.11E-06  |
| SIGLEC10 | rs4857410   | 3  | 98635069  | T | C | 0.15 | -0.08 | 0.01 | 1.68E-07  |
| SIGLEC10 | rs634501    | 5  | 180791668 | G | A | 0.74 | -0.06 | 0.01 | 1.22E-06  |
| SIGLEC10 | rs562289    | 6  | 32609269  | T | C | 0.23 | 0.07  | 0.01 | 9.67E-08  |
| SIGLEC10 | rs3184504   | 12 | 111446804 | C | T | 0.52 | -0.11 | 0.01 | 2.16E-24  |
| SIGLEC10 | rs186021206 | 17 | 7166093   | A | G | 0.01 | 0.85  | 0.05 | 3.81E-31  |
| SIGLEC10 | rs34557412  | 17 | 16948873  | G | A | 0.01 | 0.44  | 0.04 | 1.94E-11  |
| SIGLEC10 | rs148783636 | 19 | 51407725  | C | T | 0.02 | -1.57 | 0.03 | 1.27E-291 |
| SIGLEC10 | rs3747207   | 22 | 43928975  | A | G | 0.22 | 0.06  | 0.01 | 1.12E-05  |
| SIGLEC5  | rs7137828   | 12 | 111494996 | T | C | 0.52 | -0.06 | 0.01 | 1.97E-10  |
| SIGLEC5  | rs186021206 | 17 | 7166093   | A | G | 0.01 | 0.45  | 0.04 | 1.37E-13  |
| SIGLEC5  | rs1106476   | 19 | 51627384  | A | T | 0.11 | -1.21 | 0.01 | 0.00E+00  |
| SIGLEC6  | rs115427247 | 1  | 92412850  | T | C | 0.03 | -0.16 | 0.02 | 2.95E-07  |
| SIGLEC6  | rs4951018   | 1  | 205667206 | C | A | 0.23 | -0.07 | 0.01 | 3.43E-08  |
| SIGLEC6  | rs74227709  | 1  | 247559286 | A | G | 0.07 | 0.14  | 0.01 | 2.57E-12  |
| SIGLEC6  | rs3111414   | 2  | 8303729   | G | C | 0.80 | -0.12 | 0.01 | 2.08E-20  |
| SIGLEC6  | rs7573683   | 2  | 60353959  | C | T | 0.54 | -0.05 | 0.01 | 1.43E-05  |
| SIGLEC6  | rs4384720   | 2  | 144667834 | G | C | 0.92 | 0.11  | 0.01 | 1.81E-09  |
| SIGLEC6  | rs773890649 | 3  | 69801056  | T | C | 0.21 | 0.05  | 0.01 | 1.94E-05  |
| SIGLEC6  | rs1516527   | 3  | 148891917 | C | T | 0.95 | 0.22  | 0.02 | 1.35E-20  |
| SIGLEC6  | rs576666495 | 3  | 158217690 | G | A | 0.00 | -0.44 | 0.06 | 1.49E-06  |
| SIGLEC6  | rs13107325  | 4  | 102267552 | T | C | 0.08 | 0.12  | 0.01 | 1.70E-09  |
| SIGLEC6  | rs4863714   | 4  | 139986183 | G | A | 0.64 | 0.05  | 0.01 | 9.69E-07  |
| SIGLEC6  | rs622076    | 6  | 31858928  | A | G | 0.16 | 0.12  | 0.01 | 4.73E-18  |
| SIGLEC6  | rs2299876   | 6  | 119216358 | G | A | 0.41 | -0.08 | 0.01 | 9.80E-14  |
| SIGLEC6  | rs10441775  | 9  | 91719626  | G | A | 0.69 | 0.05  | 0.01 | 1.68E-05  |
| SIGLEC6  | rs56278466  | 10 | 17833858  | G | T | 0.66 | 0.05  | 0.01 | 4.27E-06  |
| SIGLEC6  | rs2155311   | 11 | 126421580 | A | G | 0.48 | -0.11 | 0.01 | 4.47E-24  |
| SIGLEC6  | rs3184504   | 12 | 111446804 | C | T | 0.52 | -0.07 | 0.01 | 3.64E-12  |
| SIGLEC6  | rs4454799   | 12 | 120879272 | T | G | 0.47 | -0.06 | 0.01 | 2.47E-10  |
| SIGLEC6  | rs76428106  | 13 | 28029870  | C | T | 0.01 | 0.49  | 0.03 | 7.58E-26  |
| SIGLEC6  | rs2745083   | 16 | 1234173   | A | C | 0.51 | -0.11 | 0.01 | 3.25E-28  |
| SIGLEC6  | rs62045817  | 16 | 88978825  | T | C | 0.15 | -0.07 | 0.01 | 1.25E-06  |
| SIGLEC6  | rs146261845 | 17 | 7108935   | T | C | 0.01 | 0.42  | 0.04 | 3.03E-10  |
| SIGLEC6  | rs78744187  | 19 | 33263642  | T | C | 0.08 | 0.15  | 0.01 | 9.15E-13  |
| SIGLEC6  | rs62617068  | 19 | 51531295  | A | C | 0.01 | -1.76 | 0.03 | 1.56E-271 |
| SIGLEC7  | rs1257169   | 2  | 134206291 | A | C | 0.50 | -0.06 | 0.01 | 3.60E-07  |
| SIGLEC7  | rs11721064  | 3  | 98689982  | T | G | 0.60 | -0.05 | 0.01 | 2.26E-06  |
| SIGLEC7  | rs4393849   | 3  | 194757682 | G | A | 0.31 | 0.05  | 0.01 | 9.44E-06  |
| SIGLEC7  | rs11220462  | 11 | 126374057 | A | G | 0.13 | -0.08 | 0.01 | 2.49E-07  |
| SIGLEC7  | rs3184504   | 12 | 111446804 | C | T | 0.52 | -0.07 | 0.01 | 8.72E-10  |
| SIGLEC7  | rs186021206 | 17 | 7166093   | A | G | 0.01 | 0.96  | 0.05 | 6.20E-39  |
| SIGLEC7  | rs2160725   | 17 | 68399585  | C | A | 0.49 | -0.08 | 0.01 | 1.22E-13  |
| SIGLEC7  | rs60202083  | 19 | 47268927  | A | T | 0.42 | -0.06 | 0.01 | 3.21E-08  |
| SIGLEC7  | rs140185670 | 19 | 51142883  | C | G | 0.07 | -0.63 | 0.01 | 2.09E-170 |
| SIGLEC9  | rs61830291  | 1  | 220827800 | C | A | 0.10 | -0.07 | 0.01 | 2.31E-05  |
| SIGLEC9  | rs2593704   | 2  | 134247706 | C | G | 0.78 | -0.06 | 0.01 | 2.64E-08  |
| SIGLEC9  | rs10935473  | 3  | 98698056  | T | G | 0.44 | -0.63 | 0.01 | 0.00E+00  |
| SIGLEC9  | rs1468906   | 3  | 186930328 | G | A | 0.34 | -0.05 | 0.01 | 2.81E-06  |
| SIGLEC9  | rs9260      | 6  | 32642684  | G | A | 0.81 | -0.11 | 0.01 | 5.76E-23  |
| SIGLEC9  | rs4841132   | 8  | 9326086   | G | A | 0.91 | -0.09 | 0.01 | 1.50E-09  |

|         |             |    |           |   |   |      |       |      |           |
|---------|-------------|----|-----------|---|---|------|-------|------|-----------|
| SIGLEC9 | -           | 9  | 33140495  | T | A | 0.31 | 0.09  | 0.01 | 2.94E-19  |
| SIGLEC9 | rs507666    | 9  | 133273983 | A | G | 0.18 | -0.24 | 0.01 | 8.40E-95  |
| SIGLEC9 | rs78689694  | 11 | 126364925 | C | G | 0.13 | -0.20 | 0.01 | 3.37E-52  |
| SIGLEC9 | rs10774625  | 12 | 111472415 | G | A | 0.50 | -0.04 | 0.01 | 2.53E-05  |
| SIGLEC9 | rs186021206 | 17 | 7166093   | A | G | 0.01 | 1.55  | 0.04 | 3.39E-144 |
| SIGLEC9 | rs2075803   | 19 | 51125272  | G | A | 0.55 | -0.57 | 0.01 | 0.00E+00  |
| SIRPA   | rs61747728  | 1  | 179557079 | T | C | 0.04 | 0.07  | 0.01 | 6.97E-06  |
| SIRPA   | rs1260326   | 2  | 27508073  | C | T | 0.61 | 0.03  | 0.00 | 4.08E-07  |
| SIRPA   | rs34458031  | 3  | 99033191  | A | G | 0.09 | 0.07  | 0.01 | 9.19E-12  |
| SIRPA   | rs9269915   | 6  | 32583676  | T | G | 0.72 | -0.03 | 0.00 | 9.20E-06  |
| SIRPA   | rs2519093   | 9  | 133266456 | T | C | 0.18 | -0.08 | 0.00 | 1.26E-23  |
| SIRPA   | rs186021206 | 17 | 7166093   | A | G | 0.01 | 0.42  | 0.03 | 1.87E-25  |
| SIRPA   | rs2659005   | 17 | 81244914  | T | C | 0.44 | 0.03  | 0.00 | 2.54E-06  |
| SIRPA   | rs6136377   | 20 | 1915642   | G | A | 0.38 | -1.22 | 0.01 | 0.00E+00  |
| SIRPB1  | rs61747728  | 1  | 179557079 | T | C | 0.04 | 0.13  | 0.02 | 2.46E-08  |
| SIRPB1  | rs1260326   | 2  | 27508073  | C | T | 0.61 | 0.04  | 0.01 | 8.71E-06  |
| SIRPB1  | rs7735073   | 5  | 132479665 | A | G | 0.33 | -0.05 | 0.01 | 1.56E-06  |
| SIRPB1  | rs13277237  | 8  | 129592317 | A | G | 0.57 | -0.05 | 0.01 | 1.40E-07  |
| SIRPB1  | rs3184504   | 12 | 111446804 | C | T | 0.52 | -0.08 | 0.01 | 1.09E-18  |
| SIRPB1  | rs76428106  | 13 | 28029870  | C | T | 0.01 | 0.27  | 0.03 | 1.29E-10  |
| SIRPB1  | rs777834943 | 16 | 20355409  | T | C | 0.18 | -0.06 | 0.01 | 4.23E-06  |
| SIRPB1  | rs186021206 | 17 | 7166093   | A | G | 0.01 | 0.36  | 0.04 | 1.60E-08  |
| SIRPB1  | rs6503533   | 17 | 40028327  | T | C | 0.62 | -0.05 | 0.01 | 6.07E-08  |
| SIRPB1  | rs2777895   | 17 | 59802249  | G | A | 0.55 | 0.08  | 0.01 | 8.32E-18  |
| SIRPB1  | rs7224668   | 17 | 81261988  | C | T | 0.56 | -0.05 | 0.01 | 2.60E-07  |
| SIRPB1  | rs79462675  | 20 | 1616529   | A | C | 0.13 | -0.95 | 0.01 | 0.00E+00  |
| SIRT2   | rs1354034   | 3  | 56815721  | C | T | 0.60 | 0.06  | 0.01 | 5.37E-08  |
| SIRT2   | rs342293    | 7  | 106731773 | G | C | 0.46 | -0.07 | 0.01 | 1.03E-08  |
| SIRT2   | -           | 10 | 63156270  | A | T | 0.49 | 0.06  | 0.01 | 2.94E-08  |
| SIRT2   | rs11502185  | 11 | 180258    | C | T | 0.26 | 0.06  | 0.01 | 1.44E-05  |
| SIRT2   | rs144373891 | 19 | 38889130  | T | C | 0.01 | -0.70 | 0.04 | 3.96E-32  |
| SIT1    | rs3184504   | 12 | 111446804 | C | T | 0.52 | -0.10 | 0.01 | 1.38E-17  |
| SIT1    | rs10468017  | 15 | 58386313  | T | C | 0.30 | -0.06 | 0.01 | 9.37E-07  |
| SIT1    | rs71374020  | 16 | 30641303  | T | A | 0.30 | -0.06 | 0.01 | 1.21E-05  |
| SIT1    | rs12446515  | 16 | 56953103  | T | C | 0.32 | -0.08 | 0.01 | 2.84E-11  |
| SIT1    | rs4613118   | 17 | 7394133   | G | A | 0.86 | -0.08 | 0.01 | 1.79E-06  |
| SIT1    | rs7208422   | 17 | 78134494  | T | A | 0.48 | -0.08 | 0.01 | 1.44E-12  |
| SIT1    | rs10469472  | 19 | 17376117  | G | T | 0.12 | 0.10  | 0.01 | 9.14E-08  |
| SKAP1   | rs28718232  | 6  | 32658973  | G | A | 0.21 | 0.07  | 0.01 | 1.40E-06  |
| SKAP1   | rs17323934  | 7  | 26864711  | G | C | 0.23 | -0.09 | 0.01 | 4.74E-12  |
| SKAP1   | rs3176789   | 12 | 9760134   | T | C | 0.28 | -0.06 | 0.01 | 1.37E-05  |
| SKAP1   | rs7310615   | 12 | 111427245 | G | C | 0.52 | -0.08 | 0.01 | 4.06E-11  |
| SKAP1   | rs71374020  | 16 | 30641303  | T | A | 0.30 | -0.06 | 0.01 | 7.81E-06  |
| SKAP1   | rs5817082   | 16 | 56963437  | A | C | 0.27 | 0.06  | 0.01 | 1.08E-05  |
| SKAP1   | rs12603827  | 17 | 48250540  | T | C | 0.45 | 0.05  | 0.01 | 1.09E-05  |
| SKAP1   | rs7208422   | 17 | 78134494  | T | A | 0.48 | -0.07 | 0.01 | 1.99E-09  |
| SKAP1   | rs74460666  | 19 | 17410292  | G | T | 0.12 | 0.09  | 0.01 | 4.65E-07  |
| SKAP2   | rs1354034   | 3  | 56815721  | C | T | 0.60 | 0.07  | 0.01 | 1.07E-08  |
| SKAP2   | rs10900809  | 5  | 132490630 | A | G | 0.39 | -0.06 | 0.01 | 3.75E-06  |
| SKAP2   | rs6993770   | 8  | 105569300 | T | A | 0.29 | -0.07 | 0.01 | 1.61E-07  |
| SLAMF1  | rs37454     | 1  | 43828739  | A | C | 0.35 | 0.06  | 0.01 | 2.24E-07  |
| SLAMF1  | rs7535367   | 1  | 160668460 | T | G | 0.14 | -0.14 | 0.01 | 6.61E-17  |
| SLAMF1  | rs11710456  | 3  | 187008099 | A | G | 0.28 | -0.06 | 0.01 | 2.99E-06  |
| SLAMF1  | rs9264669   | 6  | 31271904  | T | A | 0.57 | 0.07  | 0.01 | 2.44E-08  |
| SLAMF1  | rs35350651  | 12 | 111469627 | C | A | 0.50 | -0.05 | 0.01 | 2.56E-05  |
| SLAMF1  | rs186021206 | 17 | 7166093   | A | G | 0.01 | 0.77  | 0.05 | 1.67E-22  |

|          |             |    |           |   |   |      |       |      |          |
|----------|-------------|----|-----------|---|---|------|-------|------|----------|
| SLAMF6   | rs11265413  | 1  | 160490309 | A | T | 0.20 | -0.21 | 0.01 | 2.75E-51 |
| SLAMF6   | rs3184504   | 12 | 111446804 | C | T | 0.52 | -0.07 | 0.01 | 2.24E-08 |
| SLAMF6   | rs186021206 | 17 | 7166093   | A | G | 0.01 | 0.44  | 0.05 | 5.45E-08 |
| SLAMF7   | rs188468174 | 1  | 24965206  | T | C | 0.01 | -0.55 | 0.03 | 1.64E-29 |
| SLAMF7   | rs11581248  | 1  | 160750284 | T | C | 0.14 | -0.94 | 0.01 | 0.00E+00 |
| SLAMF7   | rs4972973   | 2  | 230873083 | A | G | 0.47 | -0.06 | 0.01 | 5.09E-08 |
| SLAMF7   | rs7621161   | 3  | 187009382 | A | C | 0.28 | -0.13 | 0.01 | 5.30E-31 |
| SLAMF7   | rs3094087   | 6  | 31093784  | C | T | 0.17 | -0.10 | 0.01 | 4.89E-13 |
| SLAMF7   | rs3780480   | 9  | 33163488  | T | G | 0.25 | -0.05 | 0.01 | 6.38E-06 |
| SLAMF7   | rs111338191 | 12 | 111388673 | T | A | 0.52 | -0.06 | 0.01 | 1.57E-07 |
| SLAMF7   | rs186021206 | 17 | 7166093   | A | G | 0.01 | 0.95  | 0.05 | 9.82E-42 |
| SLAMF7   | rs34562254  | 17 | 16939677  | A | G | 0.10 | 0.09  | 0.01 | 1.46E-07 |
| SLAMF7   | rs8077394   | 17 | 81284987  | G | A | 0.55 | -0.05 | 0.01 | 3.02E-07 |
| SLAMF7   | -           | 22 | 30037182  | G | T | 0.45 | -0.05 | 0.01 | 2.84E-06 |
| SLAMF8   | rs34687326  | 1  | 159830120 | A | G | 0.12 | -1.34 | 0.01 | 0.00E+00 |
| SLAMF8   | rs2190504   | 7  | 30467764  | C | T | 0.44 | 0.05  | 0.01 | 1.09E-06 |
| SLAMF8   | rs12667978  | 7  | 129137407 | T | C | 0.57 | 0.05  | 0.01 | 5.01E-06 |
| SLAMF8   | rs3184504   | 12 | 111446804 | C | T | 0.52 | -0.10 | 0.01 | 5.12E-20 |
| SLAMF8   | rs186021206 | 17 | 7166093   | A | G | 0.01 | 0.45  | 0.05 | 1.65E-09 |
| SLC16A1  | rs6681552   | 1  | 112891643 | A | G | 0.53 | -0.06 | 0.01 | 1.45E-07 |
| SLC16A1  | rs3811444   | 1  | 247876149 | T | C | 0.33 | -0.10 | 0.01 | 5.67E-17 |
| SLC16A1  | rs13135472  | 4  | 143989465 | C | T | 0.69 | 0.07  | 0.01 | 8.15E-08 |
| SLC16A1  | rs590856    | 6  | 139523292 | A | G | 0.55 | 0.09  | 0.01 | 8.46E-16 |
| SLC27A4  | rs1354034   | 3  | 56815721  | C | T | 0.60 | 0.10  | 0.01 | 4.16E-16 |
| SLC27A4  | rs137948800 | 9  | 128307438 | A | T | 0.12 | 0.08  | 0.01 | 3.45E-06 |
| SLC27A4  | rs7080536   | 10 | 113588287 | A | G | 0.04 | -0.19 | 0.02 | 9.16E-11 |
| SLC27A4  | rs58512066  | 11 | 266315    | C | T | 0.24 | 0.06  | 0.01 | 2.77E-05 |
| SLC39A14 | rs782470771 | 7  | 73608603  | A | G | 0.13 | -0.08 | 0.01 | 1.15E-05 |
| SLC39A14 | rs35486529  | 8  | 22394355  | T | C | 0.26 | -0.11 | 0.01 | 5.20E-16 |
| SLC39A14 | -           | 12 | 21191379  | G | A | 0.24 | 0.10  | 0.01 | 2.98E-12 |
| SLC39A14 | rs28929474  | 14 | 94378610  | T | C | 0.02 | 0.31  | 0.03 | 2.45E-14 |
| SLC39A5  | rs12065546  | 1  | 230159498 | T | C | 0.85 | 0.08  | 0.01 | 1.32E-06 |
| SLC39A5  | rs9266089   | 6  | 31352732  | A | G | 0.18 | -0.09 | 0.01 | 1.49E-09 |
| SLC39A5  | rs7786376   | 7  | 73628284  | G | A | 0.28 | -0.07 | 0.01 | 3.23E-08 |
| SLC39A5  | rs2272662   | 8  | 144414342 | C | T | 0.58 | -0.06 | 0.01 | 2.30E-07 |
| SLC39A5  | rs147572362 | 12 | 56231330  | C | T | 0.01 | -0.70 | 0.04 | 4.32E-28 |
| SLC39A5  | rs111349624 | 12 | 123288246 | C | A | 0.08 | 0.09  | 0.01 | 4.04E-06 |
| SLC39A5  | rs28929474  | 14 | 94378610  | T | C | 0.02 | 0.34  | 0.03 | 3.72E-18 |
| SLC39A5  | rs11078597  | 17 | 1715069   | C | T | 0.19 | 0.07  | 0.01 | 5.63E-06 |
| SLC39A5  | -           | 19 | 35062059  | T | A | 0.93 | 0.10  | 0.01 | 1.77E-05 |
| SLC39A5  | rs55953905  | 21 | 41510744  | T | C | 0.25 | 0.10  | 0.01 | 2.64E-14 |
| SLIT2    | rs1185160   | 4  | 20198728  | T | G | 0.70 | -0.06 | 0.01 | 6.39E-07 |
| SLITRK2  | rs61830291  | 1  | 220827800 | C | A | 0.10 | -0.09 | 0.01 | 9.55E-06 |
| SLITRK2  | rs62262391  | 3  | 123386272 | T | C | 0.22 | 0.07  | 0.01 | 7.22E-08 |
| SLITRK2  | rs68119427  | 4  | 56891864  | G | C | 0.35 | 0.05  | 0.01 | 1.28E-05 |
| SLITRK2  | rs13107325  | 4  | 102267552 | T | C | 0.08 | 0.26  | 0.01 | 5.44E-36 |
| SLITRK2  | rs78334147  | 5  | 109681535 | T | C | 0.10 | 0.11  | 0.01 | 1.51E-08 |
| SLITRK2  | rs2811708   | 9  | 21973423  | T | G | 0.26 | 0.07  | 0.01 | 4.96E-08 |
| SLITRK2  | rs1131773   | 9  | 93077974  | G | A | 0.14 | 0.07  | 0.01 | 8.05E-06 |
| SLITRK2  | rs56278466  | 10 | 17833858  | G | T | 0.66 | 0.07  | 0.01 | 1.88E-10 |
| SLITRK2  | rs10823396  | 10 | 69483567  | G | C | 0.46 | 0.05  | 0.01 | 9.72E-06 |
| SLITRK2  | rs12805381  | 11 | 11254541  | T | G | 0.45 | 0.08  | 0.01 | 3.17E-13 |
| SLITRK2  | rs774868556 | 12 | 89431449  | A | A | 0.31 | -0.09 | 0.01 | 1.00E-11 |
| SLITRK2  | rs186021206 | 17 | 7166093   | A | G | 0.01 | 0.43  | 0.05 | 1.93E-08 |
| SLITRK6  | rs61747728  | 1  | 179557079 | T | C | 0.04 | 0.14  | 0.02 | 1.88E-06 |
| SLITRK6  | rs1260326   | 2  | 27508073  | C | T | 0.61 | 0.07  | 0.01 | 1.51E-08 |

|         |             |    |           |   |   |      |       |      |           |
|---------|-------------|----|-----------|---|---|------|-------|------|-----------|
| SLITRK6 | rs13107325  | 4  | 102267552 | T | C | 0.07 | 0.10  | 0.01 | 1.60E-06  |
| SLITRK6 | rs7712631   | 5  | 154230042 | A | G | 0.42 | 0.09  | 0.01 | 7.54E-15  |
| SLITRK6 | rs149556327 | 9  | 93046096  | A | G | 0.07 | 0.09  | 0.01 | 2.09E-05  |
| SLITRK6 | -           | 9  | 133274293 | A | C | 0.18 | -0.07 | 0.01 | 1.17E-06  |
| SLITRK6 | rs36115375  | 10 | 7735836   | A | C | 0.06 | -0.15 | 0.01 | 1.71E-10  |
| SLITRK6 | rs56278466  | 10 | 17833858  | G | T | 0.66 | 0.07  | 0.01 | 1.48E-08  |
| SLITRK6 | rs12863734  | 13 | 85796436  | A | G | 0.02 | -1.40 | 0.03 | 1.03E-223 |
| SMAD1   | rs1260326   | 2  | 27508073  | C | T | 0.61 | -0.05 | 0.01 | 1.28E-05  |
| SMAD1   | rs1354034   | 3  | 56815721  | C | T | 0.60 | 0.05  | 0.01 | 9.87E-06  |
| SMAD1   | rs342293    | 7  | 106731773 | G | C | 0.46 | -0.06 | 0.01 | 1.01E-07  |
| SMAD1   | rs6993770   | 8  | 105569300 | T | A | 0.29 | -0.07 | 0.01 | 3.28E-08  |
| SMAD1   | rs964184    | 11 | 116778201 | C | G | 0.87 | -0.08 | 0.01 | 1.45E-05  |
| SMAD5   | rs4643790   | 4  | 153788702 | A | G | 0.20 | -0.21 | 0.01 | 2.36E-52  |
| SMAD5   | rs3129777   | 6  | 32678407  | A | C | 0.21 | -0.08 | 0.01 | 4.83E-08  |
| SMAD5   | -           | 9  | 133263362 | G | A | 0.18 | -0.19 | 0.01 | 2.83E-39  |
| SMOC1   | rs2090034   | 2  | 20172648  | A | G | 0.47 | -0.06 | 0.01 | 1.30E-07  |
| SMOC1   | rs35457250  | 3  | 186620775 | T | C | 0.01 | 0.31  | 0.04 | 4.41E-08  |
| SMOC1   | rs11755689  | 6  | 32618599  | G | A | 0.33 | 0.06  | 0.01 | 2.09E-07  |
| SMOC1   | rs2960834   | 7  | 1163320   | C | G | 0.45 | 0.05  | 0.01 | 1.73E-06  |
| SMOC1   | rs705379    | 7  | 95324583  | A | G | 0.48 | 0.08  | 0.01 | 3.26E-13  |
| SMOC1   | -           | 11 | 116752497 | T | A | 0.86 | -0.08 | 0.01 | 3.80E-08  |
| SMOC1   | rs1958078   | 14 | 69888141  | C | A | 0.85 | 0.37  | 0.01 | 6.92E-139 |
| SMOC1   | rs28929474  | 14 | 94378610  | T | C | 0.02 | 0.18  | 0.02 | 2.18E-06  |
| SMOC1   | rs77542162  | 17 | 69085137  | G | A | 0.02 | 0.45  | 0.02 | 8.16E-40  |
| SMOC1   | rs584007    | 19 | 44913221  | G | A | 0.64 | 0.06  | 0.01 | 7.16E-08  |
| SMOC1   | rs3830725   | 20 | 45336067  | T | C | 0.24 | -0.06 | 0.01 | 2.73E-06  |
| SMOC1   | rs4239651   | 20 | 47711852  | C | T | 0.79 | -0.07 | 0.01 | 6.91E-08  |
| SMOC2   | rs4708467   | 6  | 168424579 | T | C | 0.28 | -0.39 | 0.01 | 6.28E-247 |
| SMOC2   | rs56408342  | 8  | 22190977  | A | G | 0.05 | -0.11 | 0.01 | 5.00E-07  |
| SMOC2   | rs4759276   | 12 | 57132863  | A | G | 0.39 | 0.05  | 0.01 | 1.27E-06  |
| SMOC2   | rs77924615  | 16 | 20381010  | A | G | 0.20 | -0.06 | 0.01 | 7.00E-06  |
| SMOC2   | rs7247412   | 19 | 51810615  | C | T | 0.27 | -0.12 | 0.01 | 6.53E-25  |
| SMPD1   | rs78444298  | 1  | 184702964 | A | G | 0.02 | -0.21 | 0.02 | 1.01E-07  |
| SMPD1   | -           | 4  | 87292522  | A | T | 0.43 | -0.05 | 0.01 | 1.94E-06  |
| SMPD1   | rs114816312 | 4  | 109717668 | T | C | 0.01 | 0.33  | 0.04 | 4.91E-08  |
| SMPD1   | rs2389688   | 4  | 118815641 | C | A | 0.44 | -0.05 | 0.01 | 6.32E-06  |
| SMPD1   | rs77945361  | 4  | 153333382 | A | G | 0.15 | -0.08 | 0.01 | 2.88E-07  |
| SMPD1   | -           | 6  | 130042457 | C | T | 0.57 | 0.05  | 0.01 | 6.69E-07  |
| SMPD1   | rs199922514 | 8  | 9325592   | G | A | 0.91 | 0.08  | 0.01 | 1.78E-05  |
| SMPD1   | rs11791806  | 9  | 34633532  | T | C | 0.17 | 0.06  | 0.01 | 4.62E-06  |
| SMPD1   | rs772851187 | 10 | 63147821  | T | G | 0.47 | 0.08  | 0.01 | 5.56E-15  |
| SMPD1   | rs12257692  | 10 | 72944091  | C | T | 0.04 | -0.11 | 0.02 | 2.77E-05  |
| SMPD1   | rs2862954   | 10 | 100152307 | C | T | 0.50 | -0.06 | 0.01 | 1.22E-07  |
| SMPD1   | rs1050239   | 11 | 6394233   | A | G | 0.24 | -0.44 | 0.01 | 1.01E-270 |
| SMPD1   | rs10778152  | 12 | 101831973 | G | A | 0.29 | -0.34 | 0.01 | 1.77E-188 |
| SMPD1   | rs150641790 | 13 | 41113708  | G | T | 0.07 | 0.12  | 0.01 | 3.42E-09  |
| SMPD1   | rs71435622  | 14 | 39242324  | T | A | 0.29 | 0.07  | 0.01 | 3.84E-08  |
| SMPD1   | rs112635299 | 14 | 94371805  | T | G | 0.02 | 0.34  | 0.02 | 1.23E-21  |
| SMPD1   | rs139974673 | 15 | 43735687  | C | T | 0.02 | 0.16  | 0.02 | 2.17E-06  |
| SMPD1   | -           | 15 | 60595685  | G | A | 0.62 | 0.07  | 0.01 | 9.96E-10  |
| SMPD1   | rs58542926  | 19 | 19268740  | T | C | 0.08 | 0.16  | 0.01 | 5.65E-16  |
| SMPD1   | rs429358    | 19 | 44908684  | C | T | 0.16 | -0.10 | 0.01 | 2.15E-11  |
| SMPD1   | rs11668882  | 19 | 54171328  | C | T | 0.44 | 0.06  | 0.01 | 5.65E-08  |
| SMPD1   | rs3747207   | 22 | 43928975  | A | G | 0.22 | 0.07  | 0.01 | 3.37E-08  |
| SMPDL3A | rs114165349 | 1  | 26695422  | C | G | 0.02 | 0.18  | 0.02 | 8.93E-09  |
| SMPDL3A | rs2642438   | 1  | 220796686 | G | A | 0.70 | 0.04  | 0.01 | 1.57E-05  |

|         |             |    |           |   |   |      |       |      |          |
|---------|-------------|----|-----------|---|---|------|-------|------|----------|
| SMPDL3A | rs687339    | 3  | 136213517 | T | C | 0.77 | 0.09  | 0.01 | 1.27E-16 |
| SMPDL3A | rs114816312 | 4  | 109717668 | T | C | 0.01 | 0.25  | 0.03 | 2.39E-06 |
| SMPDL3A | rs114667001 | 4  | 118865819 | C | T | 0.06 | -0.10 | 0.01 | 1.33E-06 |
| SMPDL3A | rs41280463  | 4  | 153270074 | A | G | 0.17 | -0.07 | 0.01 | 2.96E-09 |
| SMPDL3A | rs2522063   | 5  | 132469899 | T | G | 0.18 | 0.05  | 0.01 | 8.06E-06 |
| SMPDL3A | rs567092558 | 5  | 173120385 | T | C | 0.14 | -0.06 | 0.01 | 3.58E-06 |
| SMPDL3A | rs28385609  | 6  | 122801319 | T | C | 0.14 | -1.01 | 0.01 | 0.00E+00 |
| SMPDL3A | rs9414801   | 10 | 63389329  | A | G | 0.53 | -0.06 | 0.01 | 4.37E-10 |
| SMPDL3A | -           | 10 | 72768827  | T | C | 0.04 | -0.13 | 0.01 | 2.01E-08 |
| SMPDL3A | rs2862954   | 10 | 100152307 | C | T | 0.50 | -0.06 | 0.01 | 9.47E-12 |
| SMPDL3A | rs10787429  | 10 | 112189906 | C | T | 0.73 | -0.06 | 0.01 | 4.60E-08 |
| SMPDL3A | rs10128858  | 12 | 101827588 | G | A | 0.29 | -0.41 | 0.01 | 0.00E+00 |
| SMPDL3A | rs2464190   | 12 | 120977587 | C | T | 0.41 | 0.04  | 0.01 | 1.16E-05 |
| SMPDL3A | rs150641790 | 13 | 41113708  | G | T | 0.07 | 0.13  | 0.01 | 4.91E-13 |
| SMPDL3A | rs11622951  | 14 | 39253478  | A | G | 0.46 | 0.06  | 0.01 | 7.20E-12 |
| SMPDL3A | rs145078947 | 14 | 93186629  | T | G | 0.00 | 0.79  | 0.06 | 1.53E-18 |
| SMPDL3A | rs147233090 | 15 | 43735849  | T | C | 0.02 | 0.17  | 0.02 | 7.13E-08 |
| SMPDL3A | -           | 15 | 60595685  | G | A | 0.62 | 0.05  | 0.01 | 8.41E-07 |
| SMPDL3A | -           | 18 | 74259946  | T | A | 0.71 | 0.05  | 0.01 | 1.29E-05 |
| SMPDL3A | rs58542926  | 19 | 19268740  | T | C | 0.08 | 0.19  | 0.01 | 2.74E-27 |
| SMPDL3A | rs429358    | 19 | 44908684  | C | T | 0.16 | -0.10 | 0.01 | 1.33E-15 |
| SMPDL3A | rs626283    | 19 | 54173307  | C | G | 0.44 | 0.06  | 0.01 | 1.22E-09 |
| SMPDL3A | rs738408    | 22 | 43928850  | T | C | 0.22 | 0.07  | 0.01 | 5.94E-10 |
| SNAP23  | rs1354034   | 3  | 56815721  | C | T | 0.60 | 0.11  | 0.01 | 8.43E-22 |
| SNAP23  | rs6993770   | 8  | 105569300 | T | A | 0.29 | -0.06 | 0.01 | 7.17E-06 |
| SNAP23  | rs10820606  | 9  | 96430637  | C | A | 0.23 | -0.08 | 0.01 | 2.07E-09 |
| SNAP23  | rs11502185  | 11 | 180258    | C | T | 0.26 | 0.08  | 0.01 | 1.82E-08 |
| SNAP29  | rs1354034   | 3  | 56815721  | C | T | 0.60 | 0.08  | 0.01 | 1.90E-11 |
| SNAP29  | rs11242109  | 5  | 132341354 | T | G | 0.48 | -0.05 | 0.01 | 2.78E-06 |
| SNAP29  | rs6993770   | 8  | 105569300 | T | A | 0.29 | -0.07 | 0.01 | 6.87E-09 |
| SNAP29  | rs892090    | 19 | 55027704  | G | T | 0.83 | 0.08  | 0.01 | 1.06E-06 |
| SNAP29  | rs5759874   | 22 | 20662861  | G | A | 0.09 | -0.13 | 0.01 | 3.23E-10 |
| SNCG    | rs873110    | 10 | 86964862  | T | C | 0.24 | -1.06 | 0.01 | 0.00E+00 |
| SNX9    | rs688167    | 6  | 157671616 | G | C | 0.71 | -0.09 | 0.01 | 1.14E-12 |
| SNX9    | rs342298    | 7  | 106733200 | T | C | 0.46 | -0.07 | 0.01 | 6.69E-10 |
| SOD1    | rs1354034   | 3  | 56815721  | C | T | 0.60 | 0.05  | 0.01 | 1.23E-05 |
| SOD1    | rs6993770   | 8  | 105569300 | T | A | 0.29 | -0.11 | 0.01 | 1.02E-17 |
| SOD1    | rs7282332   | 21 | 31753926  | A | G | 0.10 | 0.09  | 0.01 | 1.04E-06 |
| SOD2    | rs1570805   | 1  | 156294857 | T | C | 0.11 | 0.09  | 0.01 | 1.84E-06 |
| SOD2    | rs3821884   | 3  | 45975107  | G | T | 0.53 | -0.05 | 0.01 | 2.58E-05 |
| SOD2    | rs9272548   | 6  | 32639185  | C | T | 0.19 | -0.07 | 0.01 | 1.31E-05 |
| SOD2    | rs732498    | 6  | 159670528 | A | G | 0.31 | 0.15  | 0.01 | 1.78E-38 |
| SOD2    | rs4541868   | 8  | 105578477 | A | C | 0.27 | -0.05 | 0.01 | 1.61E-05 |
| SOD2    | rs9411378   | 9  | 133270015 | A | C | 0.22 | 0.06  | 0.01 | 2.00E-05 |
| SOD2    | rs117692263 | 12 | 7472418   | C | T | 0.08 | 0.16  | 0.01 | 1.55E-16 |
| SOD2    | rs2072694   | 16 | 1455428   | G | C | 0.52 | 0.05  | 0.01 | 6.93E-06 |
| SOD2    | rs12975366  | 19 | 54255498  | C | T | 0.40 | -0.15 | 0.01 | 6.07E-43 |
| SORCS2  | rs4234798   | 4  | 7218206   | G | T | 0.62 | -0.46 | 0.01 | 0.00E+00 |
| SORCS2  | rs4253238   | 4  | 186227233 | T | C | 0.51 | -0.07 | 0.01 | 1.40E-10 |
| SORCS2  | rs1344684   | 12 | 89458895  | G | A | 0.71 | 0.05  | 0.01 | 4.65E-06 |
| SORCS2  | rs7203642   | 16 | 20355808  | G | A | 0.19 | -0.07 | 0.01 | 8.42E-07 |
| SORD    | rs10733608  | 9  | 114386150 | T | G | 0.49 | -0.05 | 0.01 | 2.26E-05 |
| SORD    | rs137936987 | 12 | 7394123   | C | A | 0.03 | -0.28 | 0.02 | 6.35E-19 |
| SORD    | rs72722075  | 15 | 45031276  | T | C | 0.13 | 0.21  | 0.01 | 5.97E-35 |
| SORD    | rs3747207   | 22 | 43928975  | A | G | 0.22 | 0.07  | 0.01 | 3.61E-07 |
| SORT1   | rs61394658  | 1  | 109330668 | A | G | 0.23 | -0.18 | 0.01 | 1.97E-42 |

|         |             |    |           |   |   |      |       |      |          |
|---------|-------------|----|-----------|---|---|------|-------|------|----------|
| SORT1   | rs2079797   | 3  | 47300311  | A | G | 0.45 | 0.06  | 0.01 | 2.00E-06 |
| SORT1   | rs13303     | 3  | 52523992  | C | T | 0.56 | 0.07  | 0.01 | 5.76E-09 |
| SORT1   | -           | 3  | 58414616  | G | A | 0.37 | 0.06  | 0.01 | 1.47E-07 |
| SORT1   | rs139596721 | 4  | 153540161 | T | C | 0.03 | 0.16  | 0.02 | 1.29E-06 |
| SORT1   | rs4703589   | 5  | 72801524  | C | T | 0.53 | 0.05  | 0.01 | 6.76E-06 |
| SORT1   | rs4098923   | 6  | 31225979  | G | A | 0.45 | -0.05 | 0.01 | 1.63E-05 |
| SORT1   | rs139141690 | 7  | 101856650 | A | G | 0.00 | 0.65  | 0.05 | 7.79E-15 |
| SORT1   | rs6993770   | 8  | 105569300 | T | A | 0.29 | -0.18 | 0.01 | 1.05E-47 |
| SORT1   | rs385893    | 9  | 4763176   | C | T | 0.52 | 0.06  | 0.01 | 4.73E-07 |
| SORT1   | rs10984405  | 9  | 97928273  | G | A | 0.36 | 0.08  | 0.01 | 4.23E-11 |
| SORT1   | rs2519093   | 9  | 133266456 | T | C | 0.18 | -0.09 | 0.01 | 3.06E-10 |
| SORT1   | rs774510679 | 10 | 63304076  | A | C | 0.41 | 0.09  | 0.01 | 2.74E-15 |
| SORT1   | rs17490626  | 10 | 69458890  | C | G | 0.13 | 0.16  | 0.01 | 6.52E-23 |
| SORT1   | rs3184504   | 12 | 111446804 | C | T | 0.52 | -0.07 | 0.01 | 2.46E-10 |
| SORT1   | rs7176023   | 15 | 64808808  | C | T | 0.07 | 0.10  | 0.01 | 8.30E-06 |
| SORT1   | rs12445050  | 16 | 81837364  | T | C | 0.14 | 0.07  | 0.01 | 2.44E-05 |
| SORT1   | rs781416314 | 16 | 88477072  | A | T | 0.34 | -0.05 | 0.01 | 2.34E-05 |
| SORT1   | rs892090    | 19 | 55027704  | G | T | 0.83 | 0.13  | 0.01 | 6.70E-18 |
| SOST    | rs4973180   | 2  | 229236796 | C | T | 0.18 | -0.08 | 0.01 | 6.46E-08 |
| SOST    | rs17138646  | 5  | 116010548 | G | T | 0.12 | 0.11  | 0.01 | 5.86E-12 |
| SOST    | rs66642874  | 6  | 44793317  | C | T | 0.22 | -0.07 | 0.01 | 1.61E-07 |
| SOST    | rs34115816  | 6  | 133047963 | A | G | 0.32 | 0.08  | 0.01 | 2.99E-13 |
| SOST    | rs73169672  | 7  | 151250992 | T | A | 0.11 | 0.09  | 0.01 | 1.07E-07 |
| SOST    | rs11995824  | 8  | 119000461 | G | C | 0.54 | -0.10 | 0.01 | 1.62E-22 |
| SOST    | -           | 11 | 87170008  | C | T | 0.32 | 0.06  | 0.01 | 1.04E-06 |
| SOST    | rs215226    | 12 | 482134    | G | A | 0.40 | -0.20 | 0.01 | 1.82E-74 |
| SOST    | rs7968637   | 12 | 53409849  | C | T | 0.18 | 0.07  | 0.01 | 2.87E-06 |
| SOST    | rs34001253  | 13 | 42509157  | G | A | 0.03 | 0.19  | 0.02 | 2.91E-10 |
| SOST    | rs7325334   | 13 | 110458327 | G | C | 0.60 | 0.05  | 0.01 | 2.60E-05 |
| SOST    | rs34369065  | 15 | 50898548  | T | C | 0.51 | -0.06 | 0.01 | 1.68E-08 |
| SOST    | rs1513671   | 17 | 43729942  | C | G | 0.64 | -0.06 | 0.01 | 4.14E-08 |
| SOST    | rs884205    | 18 | 62387624  | C | A | 0.75 | 0.07  | 0.01 | 1.62E-08 |
| SOST    | rs34952318  | 20 | 11196407  | A | G | 0.05 | -0.14 | 0.02 | 8.58E-09 |
| SOST    | rs6127099   | 20 | 54114863  | T | A | 0.28 | -0.06 | 0.01 | 5.42E-06 |
| SPARC   | -           | 1  | 156911262 | T | C | 0.10 | 0.09  | 0.01 | 6.12E-06 |
| SPARC   | rs13412535  | 2  | 224010157 | A | G | 0.23 | -0.07 | 0.01 | 1.89E-06 |
| SPARC   | rs7618405   | 3  | 18209017  | A | C | 0.20 | -0.06 | 0.01 | 1.65E-05 |
| SPARC   | rs1354034   | 3  | 56815721  | C | T | 0.60 | -0.10 | 0.01 | 7.08E-19 |
| SPARC   | rs755492124 | 4  | 101856385 | T | G | 0.39 | -0.06 | 0.01 | 1.12E-07 |
| SPARC   | rs11242109  | 5  | 132341354 | T | G | 0.48 | -0.05 | 0.01 | 1.70E-05 |
| SPARC   | rs576037440 | 5  | 151683029 | A | G | 0.00 | -0.70 | 0.06 | 1.20E-12 |
| SPARC   | rs138614581 | 6  | 31436393  | T | A | 0.08 | -0.10 | 0.01 | 1.79E-06 |
| SPARC   | rs1608696   | 6  | 70619562  | C | T | 0.31 | -0.05 | 0.01 | 2.79E-05 |
| SPARC   | rs6961069   | 7  | 80589645  | T | C | 0.40 | 0.07  | 0.01 | 2.28E-08 |
| SPARC   | rs6993770   | 8  | 105569300 | T | A | 0.29 | -0.12 | 0.01 | 2.23E-20 |
| SPARC   | -           | 10 | 63433569  | C | T | 0.49 | -0.06 | 0.01 | 9.88E-08 |
| SPARC   | rs34377578  | 10 | 102576669 | C | A | 0.25 | 0.10  | 0.01 | 3.52E-15 |
| SPARC   | rs4573747   | 12 | 6181464   | G | A | 0.48 | -0.05 | 0.01 | 2.61E-05 |
| SPARC   | rs35785237  | 12 | 54328275  | A | C | 0.43 | 0.06  | 0.01 | 8.55E-08 |
| SPARC   | rs2127869   | 14 | 65327634  | C | T | 0.71 | 0.05  | 0.01 | 2.74E-05 |
| SPARC   | rs59001897  | 15 | 64868193  | A | T | 0.17 | 0.07  | 0.01 | 1.50E-06 |
| SPARC   | rs28734133  | 16 | 81840430  | G | A | 0.18 | 0.08  | 0.01 | 2.48E-08 |
| SPARC   | rs1654425   | 19 | 55027612  | C | T | 0.83 | 0.17  | 0.01 | 2.92E-27 |
| SPARC   | rs3790176   | 20 | 19281278  | A | G | 0.34 | 0.06  | 0.01 | 3.51E-06 |
| SPARCL1 | rs4693826   | 4  | 87510740  | C | T | 0.36 | 0.71  | 0.01 | 0.00E+00 |
| SPARCL1 | -           | 9  | 133263362 | G | A | 0.18 | -0.16 | 0.01 | 7.88E-39 |



|         |             |    |           |   |   |      |       |      |           |
|---------|-------------|----|-----------|---|---|------|-------|------|-----------|
| SPARCL1 | rs217184    | 16 | 72072066  | C | T | 0.20 | -0.15 | 0.01 | 2.44E-34  |
| SPARCL1 | rs77542162  | 17 | 69085137  | G | A | 0.02 | 0.21  | 0.02 | 4.10E-11  |
| SPARCL1 | rs55639531  | 18 | 394341    | G | C | 0.29 | 0.05  | 0.01 | 1.41E-05  |
| SPINK1  | rs28817415  | 4  | 76480299  | T | C | 0.46 | 0.05  | 0.01 | 9.22E-07  |
| SPINK1  | rs7725017   | 5  | 147838260 | A | C | 0.60 | -0.40 | 0.01 | 1.08E-273 |
| SPINK1  | rs777834943 | 16 | 20355409  | T | C | 0.18 | -0.07 | 0.01 | 6.66E-06  |
| SPINK4  | rs11129965  | 3  | 42476887  | A | G | 0.55 | -0.06 | 0.01 | 1.46E-09  |
| SPINK4  | rs369940    | 5  | 40726145  | T | A | 0.68 | -0.07 | 0.01 | 1.07E-12  |
| SPINK4  | rs4879679   | 9  | 33234021  | T | C | 0.84 | -1.11 | 0.01 | 0.00E+00  |
| SPINK4  | rs12804877  | 11 | 1087248   | G | A | 0.22 | 0.05  | 0.01 | 4.25E-06  |
| SPINK4  | -           | 11 | 111599854 | T | C | 0.71 | 0.06  | 0.01 | 5.82E-09  |
| SPINK4  | rs28529068  | 18 | 22093044  | G | A | 0.24 | 0.11  | 0.01 | 3.22E-26  |
| SPINK4  | rs2834350   | 21 | 34024827  | T | C | 0.38 | -0.05 | 0.01 | 1.24E-06  |
| SPINK5  | rs80293268  | 1  | 8147519   | C | G | 0.05 | -0.12 | 0.02 | 1.24E-05  |
| SPINK5  | rs1260326   | 2  | 27508073  | C | T | 0.61 | 0.06  | 0.01 | 4.75E-09  |
| SPINK5  | rs11384422  | 2  | 60272726  | G | A | 0.58 | 0.05  | 0.01 | 1.33E-05  |
| SPINK5  | rs6883868   | 5  | 148121320 | T | C | 0.62 | 0.41  | 0.01 | 5.08E-280 |
| SPINK5  | rs2479016   | 6  | 2245111   | G | A | 0.43 | -0.05 | 0.01 | 1.54E-05  |
| SPINK5  | rs587600964 | 9  | 133296749 | G | C | 0.12 | -0.10 | 0.01 | 7.86E-09  |
| SPINK5  | rs11220477  | 11 | 126405507 | T | C | 0.04 | -0.13 | 0.02 | 8.62E-07  |
| SPINK5  | rs186021206 | 17 | 7166093   | A | G | 0.01 | 0.87  | 0.05 | 1.60E-33  |
| SPINK5  | rs681343    | 19 | 48703205  | T | C | 0.51 | 0.20  | 0.01 | 8.68E-78  |
| SPINK6  | rs12717962  | 5  | 148186561 | G | A | 0.55 | -0.36 | 0.01 | 9.80E-237 |
| SPINT1  | -           | 1  | 38885713  | A | T | 0.46 | -0.09 | 0.01 | 7.10E-17  |
| SPINT1  | rs4671378   | 2  | 60267177  | C | T | 0.56 | 0.06  | 0.01 | 1.46E-07  |
| SPINT1  | rs13080057  | 3  | 98783709  | A | G | 0.09 | 0.13  | 0.01 | 2.54E-10  |
| SPINT1  | rs538174489 | 6  | 32540424  | T | C | 0.31 | -0.08 | 0.01 | 8.20E-11  |
| SPINT1  | -           | 9  | 133255468 | T | G | 0.06 | 0.16  | 0.02 | 7.97E-12  |
| SPINT1  | rs56278466  | 10 | 17833858  | G | T | 0.66 | 0.09  | 0.01 | 1.17E-13  |
| SPINT1  | rs73415720  | 12 | 120906712 | C | T | 0.47 | -0.05 | 0.01 | 3.10E-06  |
| SPINT1  | rs17658212  | 15 | 40853721  | T | C | 0.06 | -0.67 | 0.02 | 7.05E-164 |
| SPINT1  | rs186021206 | 17 | 7166093   | A | G | 0.01 | 0.84  | 0.05 | 2.80E-28  |
| SPINT1  | rs708686    | 19 | 5840608   | T | C | 0.27 | 0.10  | 0.01 | 6.81E-15  |
| SPINT1  | rs584768    | 19 | 48710027  | A | G | 0.53 | 0.05  | 0.01 | 9.11E-06  |
| SPINT2  | rs13412535  | 2  | 224010157 | A | G | 0.23 | -0.07 | 0.01 | 1.22E-07  |
| SPINT2  | rs1354034   | 3  | 56815721  | C | T | 0.60 | -0.10 | 0.01 | 2.02E-17  |
| SPINT2  | rs5030062   | 3  | 186736391 | C | A | 0.37 | -0.07 | 0.01 | 1.35E-08  |
| SPINT2  | rs11734099  | 4  | 6889708   | A | G | 0.17 | 0.07  | 0.01 | 1.13E-05  |
| SPINT2  | rs10016018  | 4  | 101873464 | T | A | 0.40 | -0.06 | 0.01 | 6.02E-07  |
| SPINT2  | rs66530140  | 4  | 186240057 | C | T | 0.51 | -0.15 | 0.01 | 4.21E-40  |
| SPINT2  | rs10058074  | 5  | 132350453 | A | G | 0.48 | -0.06 | 0.01 | 1.10E-06  |
| SPINT2  | rs2545801   | 5  | 177414338 | C | T | 0.74 | -0.07 | 0.01 | 4.72E-08  |
| SPINT2  | rs35173808  | 6  | 31358371  | A | C | 0.10 | -0.09 | 0.01 | 2.25E-06  |
| SPINT2  | rs6961069   | 7  | 80589645  | T | C | 0.40 | 0.07  | 0.01 | 1.13E-09  |
| SPINT2  | rs139141690 | 7  | 101856650 | A | G | 0.00 | 0.45  | 0.05 | 7.50E-08  |
| SPINT2  | rs6993770   | 8  | 105569300 | T | A | 0.29 | -0.13 | 0.01 | 1.66E-25  |
| SPINT2  | -           | 9  | 133263362 | G | A | 0.18 | -0.08 | 0.01 | 2.00E-08  |
| SPINT2  | rs10761737  | 10 | 63292445  | C | T | 0.41 | 0.09  | 0.01 | 1.79E-16  |
| SPINT2  | rs111763415 | 10 | 102570539 | G | T | 0.43 | -0.05 | 0.01 | 3.72E-06  |
| SPINT2  | rs111338191 | 12 | 111388673 | T | A | 0.52 | -0.06 | 0.01 | 3.16E-07  |
| SPINT2  | rs12445050  | 16 | 81837364  | T | C | 0.14 | 0.09  | 0.01 | 2.02E-08  |
| SPINT2  | rs45437199  | 19 | 38304610  | A | G | 0.18 | -0.19 | 0.01 | 6.33E-41  |
| SPINT2  | rs892090    | 19 | 55027704  | G | T | 0.83 | 0.13  | 0.01 | 1.71E-18  |
| SPOCK1  | rs34546909  | 1  | 47498019  | T | G | 0.80 | 0.15  | 0.01 | 4.68E-27  |
| SPOCK1  | rs4655581   | 1  | 68254752  | T | C | 0.09 | -0.09 | 0.01 | 2.67E-06  |
| SPOCK1  | rs77736461  | 2  | 18499499  | T | C | 0.31 | -0.06 | 0.01 | 2.76E-06  |

|        |             |    |           |   |   |      |       |      |           |
|--------|-------------|----|-----------|---|---|------|-------|------|-----------|
| SPOCK1 | rs62155324  | 2  | 67541208  | A | C | 0.04 | -0.19 | 0.02 | 1.10E-09  |
| SPOCK1 | rs10000888  | 4  | 145888016 | G | A | 0.51 | 0.05  | 0.01 | 2.11E-05  |
| SPOCK1 | rs4835737   | 5  | 137559375 | G | A | 0.37 | -0.13 | 0.01 | 5.24E-31  |
| SPOCK1 | rs7756288   | 6  | 15110481  | C | T | 0.26 | -0.10 | 0.01 | 8.89E-15  |
| SPOCK1 | rs3129777   | 6  | 32678407  | A | C | 0.21 | -0.09 | 0.01 | 1.09E-09  |
| SPOCK1 | rs2505507   | 10 | 43149376  | T | C | 0.27 | 0.06  | 0.01 | 4.88E-06  |
| SPOCK1 | rs703987    | 10 | 79179462  | C | G | 0.61 | -0.06 | 0.01 | 7.17E-07  |
| SPOCK1 | rs149440923 | 11 | 71997603  | G | A | 0.02 | 0.24  | 0.03 | 2.90E-07  |
| SPOCK1 | rs36100715  | 12 | 128861663 | G | T | 0.11 | -0.12 | 0.01 | 5.79E-11  |
| SPOCK1 | rs3916033   | 17 | 46812337  | T | C | 0.55 | 0.05  | 0.01 | 1.88E-06  |
| SPON1  | rs1270942   | 6  | 31951083  | G | A | 0.13 | -0.10 | 0.01 | 7.07E-10  |
| SPON1  | rs8176741   | 9  | 133256074 | A | G | 0.06 | 0.16  | 0.01 | 7.90E-14  |
| SPON1  | rs10832164  | 11 | 14026933  | T | C | 0.52 | -0.29 | 0.01 | 8.60E-158 |
| SPON1  | rs3082163   | 11 | 57190822  | T | A | 0.19 | 0.08  | 0.01 | 2.62E-08  |
| SPON1  | rs77542162  | 17 | 69085137  | G | A | 0.02 | 0.26  | 0.02 | 9.65E-14  |
| SPON1  | rs68013007  | 19 | 32447775  | T | A | 0.16 | -0.08 | 0.01 | 9.58E-08  |
| SPON1  | rs33950747  | 19 | 35848345  | T | C | 0.08 | 0.09  | 0.01 | 2.41E-05  |
| SPON1  | rs516316    | 19 | 48702888  | C | G | 0.51 | -0.08 | 0.01 | 2.31E-13  |
| SPON2  | rs28855974  | 4  | 1121121   | G | A | 0.12 | 0.31  | 0.01 | 7.75E-73  |
| SPP1   | rs35085476  | 1  | 159580314 | C | T | 0.02 | -0.17 | 0.02 | 5.57E-06  |
| SPP1   | rs559637118 | 1  | 196710779 | T | G | 0.40 | -0.05 | 0.01 | 2.40E-06  |
| SPP1   | rs9853056   | 3  | 52521941  | C | T | 0.56 | 0.05  | 0.01 | 5.93E-06  |
| SPP1   | rs56254643  | 4  | 87937733  | C | T | 0.19 | -0.11 | 0.01 | 2.55E-16  |
| SPP1   | rs4253328   | 4  | 186257633 | T | C | 0.51 | -0.06 | 0.01 | 1.03E-07  |
| SPP1   | rs11995824  | 8  | 119000461 | G | C | 0.54 | 0.06  | 0.01 | 2.48E-08  |
| SPP1   | -           | 10 | 63156270  | A | T | 0.48 | 0.06  | 0.01 | 1.36E-07  |
| SPP1   | rs548589580 | 13 | 42399147  | A | T | 0.48 | 0.06  | 0.01 | 1.35E-07  |
| SPP1   | rs117068593 | 14 | 92651884  | T | C | 0.19 | -0.09 | 0.01 | 1.77E-09  |
| SPP1   | rs113374757 | 19 | 46753285  | T | C | 0.17 | 0.07  | 0.01 | 9.65E-06  |
| SPP1   | rs738408    | 22 | 43928850  | T | C | 0.22 | 0.06  | 0.01 | 7.11E-06  |
| SPRY2  | rs3811444   | 1  | 247876149 | T | C | 0.33 | -0.05 | 0.01 | 1.95E-05  |
| SPRY2  | rs1354034   | 3  | 56815721  | C | T | 0.60 | 0.10  | 0.01 | 9.25E-17  |
| SPRY2  | rs342298    | 7  | 106733200 | T | C | 0.45 | -0.07 | 0.01 | 1.36E-08  |
| SPRY2  | rs6993770   | 8  | 105569300 | T | A | 0.29 | -0.08 | 0.01 | 6.32E-10  |
| SPRY2  | rs11502185  | 11 | 180258    | C | T | 0.26 | 0.07  | 0.01 | 2.87E-06  |
| SPRY2  | rs6580981   | 12 | 54329244  | A | G | 0.46 | 0.08  | 0.01 | 3.66E-12  |
| SPRY2  | rs504122    | 13 | 80337390  | A | G | 0.37 | -0.08 | 0.01 | 3.63E-12  |
| SPRY2  | rs200309755 | 17 | 29518756  | T | C | 0.54 | 0.05  | 0.01 | 8.86E-06  |
| SRC    | rs17622656  | 5  | 132485305 | A | G | 0.39 | -0.05 | 0.01 | 4.98E-06  |
| SRP14  | rs1354034   | 3  | 56815721  | C | T | 0.60 | 0.11  | 0.01 | 1.32E-21  |
| SRP14  | rs597808    | 12 | 111535554 | G | A | 0.52 | -0.05 | 0.01 | 2.60E-05  |
| SRP14  | -           | 17 | 35559053  | T | A | 0.17 | 0.10  | 0.01 | 1.75E-12  |
| SRPK2  | rs1354034   | 3  | 56815721  | C | T | 0.60 | 0.11  | 0.01 | 1.96E-20  |
| SRPK2  | rs342298    | 7  | 106733200 | T | C | 0.46 | -0.05 | 0.01 | 5.95E-06  |
| SRPK2  | rs7080386   | 10 | 63288546  | A | C | 0.41 | 0.06  | 0.01 | 5.54E-08  |
| SRPK2  | rs11502185  | 11 | 180258    | C | T | 0.26 | 0.06  | 0.01 | 1.58E-05  |
| SRPK2  | rs60822569  | 12 | 54323724  | C | T | 0.55 | 0.05  | 0.01 | 1.12E-05  |
| SSC4D  | rs12140070  | 1  | 28009070  | G | A | 0.31 | -0.15 | 0.01 | 2.99E-42  |
| SSC4D  | rs165316    | 1  | 91067740  | G | A | 0.20 | -0.07 | 0.01 | 6.63E-07  |
| SSC4D  | rs6908943   | 6  | 32667519  | T | C | 0.18 | -0.07 | 0.01 | 2.71E-06  |
| SSC4D  | rs12540573  | 7  | 76409696  | C | A | 0.06 | 0.68  | 0.01 | 2.77E-213 |
| SSC4D  | rs11183272  | 12 | 45988473  | A | C | 0.49 | 0.05  | 0.01 | 9.18E-07  |
| SSC4D  | rs112635299 | 14 | 94371805  | T | G | 0.02 | 0.18  | 0.02 | 1.41E-06  |
| SSC4D  | rs2498786   | 14 | 104796031 | G | C | 0.62 | -0.10 | 0.01 | 2.01E-20  |
| SSC4D  | rs339969    | 15 | 60591082  | A | C | 0.62 | 0.06  | 0.01 | 2.81E-07  |
| SSC4D  | rs35523349  | 17 | 47631920  | A | C | 0.46 | 0.05  | 0.01 | 9.04E-06  |

|         |             |    |           |   |   |      |       |      |           |
|---------|-------------|----|-----------|---|---|------|-------|------|-----------|
| SSC4D   | rs4803852   | 19 | 45735668  | T | G | 0.82 | 0.06  | 0.01 | 6.82E-06  |
| SSC4D   | rs1800961   | 20 | 44413724  | T | C | 0.03 | -0.16 | 0.02 | 1.84E-07  |
| SSC4D   | rs2739344   | 22 | 23956106  | C | A | 0.58 | -0.06 | 0.01 | 2.10E-07  |
| SSC5D   | rs56210800  | 3  | 124753745 | G | C | 0.13 | -0.09 | 0.01 | 7.85E-09  |
| SSC5D   | rs13107325  | 4  | 102267552 | T | C | 0.08 | 0.15  | 0.01 | 1.00E-13  |
| SSC5D   | rs521977    | 6  | 31869050  | G | T | 0.68 | 0.05  | 0.01 | 1.94E-05  |
| SSC5D   | -           | 7  | 7252014   | C | A | 0.62 | 0.10  | 0.01 | 1.05E-19  |
| SSC5D   | rs10231604  | 7  | 100148578 | A | G | 0.56 | 0.06  | 0.01 | 2.23E-07  |
| SSC5D   | rs2142306   | 8  | 133458388 | C | T | 0.41 | 0.09  | 0.01 | 6.24E-17  |
| SSC5D   | rs7358384   | 11 | 11619477  | A | T | 0.38 | 0.10  | 0.01 | 2.20E-22  |
| SSC5D   | rs964184    | 11 | 116778201 | C | G | 0.87 | -0.07 | 0.01 | 2.37E-06  |
| SSC5D   | rs10778118  | 12 | 101430728 | T | C | 0.79 | 0.06  | 0.01 | 2.74E-06  |
| SSC5D   | rs748853879 | 15 | 56843630  | A | T | 0.04 | 0.11  | 0.02 | 2.29E-05  |
| SSC5D   | rs200489612 | 17 | 7203059   | A | G | 0.01 | 0.68  | 0.05 | 1.92E-18  |
| SSC5D   | rs55799523  | 19 | 55488178  | A | C | 0.27 | 0.53  | 0.01 | 0.00E+00  |
| SSC5D   | rs181210490 | 20 | 3715330   | A | G | 0.01 | 0.83  | 0.03 | 1.79E-63  |
| ST3GAL1 | rs12740374  | 1  | 109274968 | T | G | 0.22 | -0.10 | 0.01 | 4.59E-15  |
| ST3GAL1 | rs539657009 | 1  | 161658666 | T | C | 0.13 | 0.08  | 0.01 | 1.96E-06  |
| ST3GAL1 | rs4672497   | 2  | 62296430  | G | C | 0.22 | 0.18  | 0.01 | 7.27E-42  |
| ST3GAL1 | rs7633553   | 3  | 58454509  | C | T | 0.70 | 0.05  | 0.01 | 2.12E-05  |
| ST3GAL1 | -           | 6  | 135099929 | C | T | 0.27 | -0.06 | 0.01 | 1.84E-06  |
| ST3GAL1 | rs9643300   | 8  | 133490905 | T | C | 0.56 | -0.24 | 0.01 | 3.95E-100 |
| ST3GAL1 | rs782134971 | 9  | 133264504 | G | C | 0.25 | 0.14  | 0.01 | 1.36E-27  |
| ST3GAL1 | rs56278466  | 10 | 17833858  | G | T | 0.66 | 0.05  | 0.01 | 1.72E-05  |
| ST3GAL1 | rs28929474  | 14 | 94378610  | T | C | 0.02 | 0.24  | 0.02 | 9.33E-10  |
| ST3GAL1 | rs28873836  | 19 | 51811402  | C | G | 0.27 | -0.10 | 0.01 | 6.02E-17  |
| ST6GAL1 | rs150110347 | 1  | 24982271  | T | C | 0.01 | 0.25  | 0.03 | 1.65E-06  |
| ST6GAL1 | rs4686837   | 3  | 187021889 | A | G | 0.31 | -0.18 | 0.01 | 3.13E-50  |
| ST6GAL1 | rs6993770   | 8  | 105569300 | T | A | 0.29 | -0.06 | 0.01 | 5.75E-06  |
| ST6GAL1 | rs9414801   | 10 | 63389329  | A | G | 0.53 | -0.05 | 0.01 | 7.46E-06  |
| ST6GAL1 | rs142744740 | 11 | 116818075 | C | A | 0.81 | -0.07 | 0.01 | 2.02E-05  |
| ST6GAL1 | rs71454159  | 12 | 89521106  | T | A | 0.72 | 0.06  | 0.01 | 1.37E-05  |
| ST6GAL1 | rs2695293   | 12 | 101693237 | A | C | 0.58 | 0.05  | 0.01 | 4.08E-06  |
| ST6GAL1 | rs28929474  | 14 | 94378610  | T | C | 0.02 | 0.21  | 0.03 | 6.59E-08  |
| ST6GAL1 | rs61658003  | 19 | 55032835  | A | C | 0.84 | 0.07  | 0.01 | 3.08E-06  |
| STAMBP  | rs559935910 | 2  | 73889990  | A | G | 0.00 | -0.89 | 0.11 | 1.47E-07  |
| STAMBP  | rs1354034   | 3  | 56815721  | C | T | 0.60 | 0.06  | 0.01 | 5.90E-07  |
| STAMBP  | rs10733789  | 10 | 63188924  | C | T | 0.31 | 0.06  | 0.01 | 7.92E-06  |
| STAT5B  | rs1354034   | 3  | 56815721  | C | T | 0.60 | 0.05  | 0.01 | 1.63E-05  |
| STAT5B  | rs342293    | 7  | 106731773 | G | C | 0.46 | -0.06 | 0.01 | 2.09E-08  |
| STAT5B  | rs6993770   | 8  | 105569300 | T | A | 0.29 | -0.07 | 0.01 | 4.11E-07  |
| STC1    | rs57247992  | 8  | 23875381  | A | G | 0.08 | 0.12  | 0.01 | 3.99E-08  |
| STC1    | rs2519093   | 9  | 133266456 | T | C | 0.18 | -0.08 | 0.01 | 1.69E-08  |
| STC1    | rs11812859  | 10 | 833279    | C | A | 0.08 | 0.11  | 0.01 | 9.62E-08  |
| STC1    | rs11830324  | 12 | 510452    | A | T | 0.17 | -0.08 | 0.01 | 2.52E-07  |
| STC1    | rs478141    | 13 | 71771960  | A | G | 0.39 | -0.08 | 0.01 | 1.92E-11  |
| STC1    | rs12460997  | 19 | 7693907   | A | C | 0.49 | -0.11 | 0.01 | 4.45E-25  |
| STC2    | rs2894602   | 2  | 226385086 | G | A | 0.77 | 0.06  | 0.01 | 1.83E-06  |
| STC2    | -           | 5  | 173336651 | T | A | 0.39 | 0.08  | 0.01 | 1.22E-11  |
| STC2    | rs5896958   | 9  | 21981631  | T | C | 0.72 | -0.06 | 0.01 | 1.96E-05  |
| STC2    | rs12380110  | 9  | 136194972 | C | T | 0.16 | 0.07  | 0.01 | 8.92E-06  |
| STC2    | rs10830278  | 11 | 89483257  | A | T | 0.80 | 0.06  | 0.01 | 1.11E-05  |
| STC2    | rs11362821  | 12 | 7514128   | A | G | 0.98 | -0.16 | 0.02 | 7.59E-06  |
| STC2    | rs3184504   | 12 | 111446804 | C | T | 0.52 | -0.06 | 0.01 | 1.64E-07  |
| STC2    | -           | 16 | 58767006  | C | T | 0.09 | 0.09  | 0.01 | 6.92E-06  |
| STC2    | rs1126464   | 16 | 89637957  | C | G | 0.24 | -0.07 | 0.01 | 6.73E-08  |

|         |             |    |           |   |   |      |       |      |           |
|---------|-------------|----|-----------|---|---|------|-------|------|-----------|
| STC2    | rs12986064  | 19 | 54251270  | C | T | 0.51 | -0.06 | 0.01 | 1.88E-08  |
| STIP1   | rs1354034   | 3  | 56815721  | C | T | 0.60 | 0.06  | 0.01 | 3.61E-08  |
| STIP1   | rs10739067  | 9  | 4684770   | G | A | 0.34 | 0.08  | 0.01 | 1.56E-10  |
| STK11   | rs1354034   | 3  | 56815721  | C | T | 0.60 | 0.07  | 0.01 | 2.12E-10  |
| STK11   | rs342293    | 7  | 106731773 | G | C | 0.46 | -0.05 | 0.01 | 1.63E-05  |
| STK11   | rs6993770   | 8  | 105569300 | T | A | 0.29 | -0.07 | 0.01 | 2.90E-08  |
| STK11   | rs7924036   | 10 | 63431885  | T | G | 0.50 | 0.05  | 0.01 | 4.99E-06  |
| STK24   | rs1354034   | 3  | 56815721  | C | T | 0.60 | 0.05  | 0.01 | 1.08E-05  |
| STK24   | rs6993770   | 8  | 105569300 | T | A | 0.29 | -0.06 | 0.01 | 1.11E-05  |
| STK4    | rs1354034   | 3  | 56815721  | C | T | 0.60 | 0.07  | 0.01 | 6.40E-10  |
| STK4    | rs10900809  | 5  | 132490630 | A | G | 0.39 | -0.05 | 0.01 | 2.72E-05  |
| STK4    | rs6993770   | 8  | 105569300 | T | A | 0.29 | -0.08 | 0.01 | 2.43E-09  |
| STK4    | rs1894572   | 20 | 45056869  | C | T | 0.47 | 0.05  | 0.01 | 6.87E-06  |
| STX16   | rs218476    | 20 | 58662614  | A | G | 0.38 | 0.06  | 0.01 | 1.69E-06  |
| STX4    | rs7090758   | 10 | 63575555  | C | T | 0.48 | -0.05 | 0.01 | 2.00E-05  |
| STX4    | rs12292693  | 11 | 65169248  | C | A | 0.26 | -0.07 | 0.01 | 1.47E-08  |
| STX6    | rs139299944 | 6  | 32634888  | T | C | 0.34 | 0.05  | 0.01 | 2.73E-05  |
| STX6    | rs342293    | 7  | 106731773 | G | C | 0.46 | -0.05 | 0.01 | 1.77E-05  |
| STX8    | rs1354034   | 3  | 56815721  | C | T | 0.60 | 0.05  | 0.01 | 6.68E-06  |
| STX8    | rs6993770   | 8  | 105569300 | T | A | 0.29 | -0.06 | 0.01 | 4.69E-06  |
| STX8    | rs8077500   | 17 | 9440454   | A | G | 0.24 | 0.10  | 0.01 | 3.19E-14  |
| SUGT1   | rs1354034   | 3  | 56815721  | C | T | 0.60 | 0.06  | 0.01 | 6.99E-08  |
| SUGT1   | rs60822569  | 12 | 54323724  | C | T | 0.55 | 0.05  | 0.01 | 1.73E-05  |
| SULT1A1 | rs148788997 | 16 | 30311847  | C | G | 0.13 | 0.15  | 0.01 | 2.17E-17  |
| SULT2A1 | rs4861708   | 4  | 186236079 | A | G | 0.51 | 0.07  | 0.01 | 4.60E-11  |
| SULT2A1 | rs6894249   | 5  | 132461855 | G | A | 0.39 | -0.05 | 0.01 | 2.01E-05  |
| SULT2A1 | -           | 7  | 64510228  | T | A | 0.64 | -0.06 | 0.01 | 5.62E-07  |
| SULT2A1 | rs62129966  | 19 | 47871693  | A | C | 0.17 | -0.37 | 0.01 | 6.91E-136 |
| SULT2A1 | rs3747207   | 22 | 43928975  | A | G | 0.22 | 0.07  | 0.01 | 8.15E-08  |
| SUMF2   | rs2642442   | 1  | 220800221 | T | C | 0.68 | -0.05 | 0.01 | 2.47E-05  |
| SUMF2   | rs1289395   | 1  | 226854761 | C | T | 0.46 | -0.05 | 0.01 | 4.94E-06  |
| SUMF2   | rs9852409   | 3  | 57637814  | A | T | 0.82 | -0.19 | 0.01 | 4.92E-41  |
| SUMF2   | rs114082534 | 4  | 118813029 | A | G | 0.06 | 0.11  | 0.02 | 2.39E-06  |
| SUMF2   | rs62396264  | 6  | 31352885  | G | C | 0.04 | 0.25  | 0.02 | 9.56E-19  |
| SUMF2   | rs6796      | 7  | 6462736   | C | T | 0.28 | 0.07  | 0.01 | 6.82E-09  |
| SUMF2   | rs35384521  | 7  | 56078132  | A | G | 0.02 | -1.53 | 0.03 | 1.03E-307 |
| SUMF2   | rs556893622 | 7  | 61107238  | A | G | 0.01 | -0.54 | 0.04 | 8.54E-15  |
| SUMF2   | rs745346394 | 7  | 67894425  | G | A | 0.00 | -1.02 | 0.15 | 1.63E-05  |
| SUMF2   | rs79499703  | 7  | 127485694 | T | C | 0.07 | -0.19 | 0.01 | 9.91E-17  |
| SUMF2   | rs199922514 | 8  | 9325592   | G | A | 0.91 | -0.22 | 0.01 | 9.15E-33  |
| SUMF2   | rs11999525  | 9  | 136476890 | A | G | 0.26 | -0.06 | 0.01 | 2.61E-06  |
| SUMF2   | rs506596    | 11 | 32075869  | C | T | 0.28 | -0.06 | 0.01 | 2.41E-07  |
| SUMF2   | rs1169288   | 12 | 120978847 | C | A | 0.31 | -0.05 | 0.01 | 1.44E-05  |
| SUMF2   | rs2291256   | 12 | 132816737 | T | C | 0.09 | -0.10 | 0.01 | 3.71E-07  |
| SUMF2   | rs438811    | 19 | 44913484  | T | C | 0.24 | 0.06  | 0.01 | 8.53E-07  |
| SUMF2   | rs4806498   | 19 | 54171009  | T | C | 0.43 | -0.07 | 0.01 | 7.46E-11  |
| SUSD1   | rs2278668   | 3  | 123116385 | C | T | 0.59 | -0.05 | 0.01 | 2.79E-05  |
| SUSD1   | rs2631360   | 5  | 132371737 | A | G | 0.52 | 0.06  | 0.01 | 6.61E-07  |
| SUSD1   | rs146879704 | 9  | 112124289 | T | C | 0.00 | -1.28 | 0.07 | 2.68E-35  |
| SUSD1   | rs61744929  | 11 | 2304197   | C | T | 0.02 | -0.43 | 0.03 | 1.25E-24  |
| SUSD1   | rs200309755 | 17 | 29518756  | T | C | 0.54 | 0.05  | 0.01 | 1.02E-05  |
| SUSD2   | rs62292583  | 3  | 186942006 | T | C | 0.13 | -0.08 | 0.01 | 7.75E-08  |
| SUSD2   | rs9269502   | 6  | 32575344  | G | A | 0.36 | -0.06 | 0.01 | 1.32E-06  |
| SUSD2   | rs7952602   | 11 | 126363774 | C | G | 0.14 | -0.07 | 0.01 | 1.99E-05  |
| SUSD2   | rs200489612 | 17 | 7203059   | A | G | 0.01 | 0.59  | 0.05 | 7.42E-15  |
| SUSD2   | rs117587385 | 22 | 24181236  | A | G | 0.04 | 1.19  | 0.02 | 0.00E+00  |

|         |             |    |           |   |   |      |       |      |           |
|---------|-------------|----|-----------|---|---|------|-------|------|-----------|
| TACC3   | rs745543985 | 4  | 1739806   | C | T | 0.47 | 0.21  | 0.01 | 1.65E-73  |
| TACC3   | rs6993770   | 8  | 105569300 | T | A | 0.29 | -0.06 | 0.01 | 8.08E-07  |
| TACC3   | rs7080386   | 10 | 63288546  | A | C | 0.41 | 0.08  | 0.01 | 5.42E-13  |
| TACC3   | rs8057254   | 16 | 8959132   | A | T | 0.19 | 0.07  | 0.01 | 7.10E-07  |
| TACC3   | rs13381663  | 18 | 25280795  | C | T | 0.21 | 0.09  | 0.01 | 1.13E-10  |
| TACSTD2 | rs7333      | 1  | 58575548  | T | C | 0.16 | -0.91 | 0.01 | 0.00E+00  |
| TACSTD2 | rs12740374  | 1  | 109274968 | T | G | 0.22 | -0.15 | 0.01 | 1.13E-25  |
| TACSTD2 | rs780093    | 2  | 27519736  | C | T | 0.62 | 0.05  | 0.01 | 2.40E-05  |
| TACSTD2 | rs34070949  | 3  | 98635347  | A | C | 0.47 | -0.05 | 0.01 | 1.69E-07  |
| TACSTD2 | rs76507355  | 6  | 29939996  | C | T | 0.08 | 0.10  | 0.01 | 1.82E-07  |
| TACSTD2 | rs7824174   | 8  | 97800530  | C | T | 0.48 | 0.25  | 0.01 | 1.37E-136 |
| TACSTD2 | rs8176693   | 9  | 133262254 | T | C | 0.06 | 0.27  | 0.01 | 1.63E-38  |
| TACSTD2 | rs529700    | 10 | 17843438  | C | T | 0.51 | 0.07  | 0.01 | 2.35E-08  |
| TACSTD2 | rs1077834   | 15 | 58431280  | C | T | 0.22 | 0.07  | 0.01 | 4.03E-08  |
| TACSTD2 | rs56156922  | 16 | 56953457  | C | T | 0.32 | 0.07  | 0.01 | 1.12E-10  |
| TACSTD2 | rs72802342  | 16 | 75200974  | A | C | 0.08 | -0.10 | 0.01 | 4.03E-07  |
| TACSTD2 | rs186021206 | 17 | 7166093   | A | G | 0.01 | 0.66  | 0.04 | 1.07E-21  |
| TACSTD2 | rs72835428  | 17 | 49183288  | T | C | 0.12 | 0.11  | 0.01 | 1.27E-13  |
| TACSTD2 | rs681343    | 19 | 48703205  | T | C | 0.51 | 0.07  | 0.01 | 4.67E-11  |
| TACSTD2 | rs2868346   | 20 | 45919331  | T | C | 0.76 | 0.06  | 0.01 | 1.02E-06  |
| TAF5    | rs2870238   | 4  | 76451926  | T | C | 0.50 | 0.06  | 0.01 | 2.30E-08  |
| TAF5    | rs113878851 | 16 | 20353760  | T | C | 0.17 | -0.09 | 0.01 | 2.75E-08  |
| TAF5    | rs79072     | 22 | 48371374  | T | G | 0.71 | 0.18  | 0.01 | 1.48E-43  |
| TARBP2  | rs1354034   | 3  | 56815721  | C | T | 0.60 | 0.07  | 0.01 | 1.67E-10  |
| TARBP2  | rs342293    | 7  | 106731773 | G | C | 0.46 | -0.05 | 0.01 | 3.67E-06  |
| TARBP2  | rs7080386   | 10 | 63288546  | A | C | 0.41 | 0.05  | 0.01 | 2.66E-05  |
| TBC1D17 | rs746738    | 19 | 49883083  | C | T | 0.43 | 0.41  | 0.01 | 2.63E-299 |
| TBC1D23 | rs1036770   | 3  | 100299871 | T | C | 0.59 | -0.15 | 0.01 | 3.29E-40  |
| TBC1D23 | rs342293    | 7  | 106731773 | G | C | 0.46 | -0.05 | 0.01 | 1.53E-05  |
| TBC1D23 | rs6993770   | 8  | 105569300 | T | A | 0.29 | -0.06 | 0.01 | 8.23E-07  |
| TBC1D23 | rs7090758   | 10 | 63575555  | C | T | 0.48 | -0.05 | 0.01 | 1.06E-05  |
| TBC1D5  | rs1354034   | 3  | 56815721  | C | T | 0.60 | 0.06  | 0.01 | 6.43E-07  |
| TBC1D5  | rs11227136  | 11 | 65164493  | A | G | 0.24 | -0.07 | 0.01 | 3.37E-07  |
| TBCB    | rs1354034   | 3  | 56815721  | C | T | 0.60 | 0.06  | 0.01 | 6.56E-08  |
| TBCB    | rs342298    | 7  | 106733200 | T | C | 0.45 | -0.05 | 0.01 | 5.21E-06  |
| TBCB    | rs6993770   | 8  | 105569300 | T | A | 0.29 | -0.06 | 0.01 | 2.09E-06  |
| TBCB    | rs7896518   | 10 | 63344740  | G | A | 0.42 | 0.06  | 0.01 | 3.35E-07  |
| TBCC    | rs1354034   | 3  | 56815721  | C | T | 0.60 | 0.06  | 0.01 | 2.46E-07  |
| TBCC    | rs2234026   | 6  | 42745880  | G | A | 0.99 | 0.59  | 0.03 | 3.04E-32  |
| TBCC    | rs342298    | 7  | 106733200 | T | C | 0.45 | -0.06 | 0.01 | 1.50E-06  |
| TBCC    | rs3847326   | 10 | 63572099  | G | A | 0.48 | -0.05 | 0.01 | 4.96E-06  |
| TBCC    | rs11502185  | 11 | 180258    | C | T | 0.26 | 0.06  | 0.01 | 1.91E-05  |
| TBL1X   | rs1354034   | 3  | 56815721  | C | T | 0.60 | -0.12 | 0.01 | 1.19E-25  |
| TBL1X   | rs736801    | 5  | 132497907 | T | C | 0.39 | -0.05 | 0.01 | 1.23E-05  |
| TBL1X   | rs139141690 | 7  | 101856650 | A | G | 0.00 | -0.44 | 0.06 | 3.23E-07  |
| TBL1X   | rs6993770   | 8  | 105569300 | T | A | 0.29 | -0.07 | 0.01 | 1.26E-07  |
| TBL1X   | rs12767683  | 10 | 102556824 | A | C | 0.32 | 0.08  | 0.01 | 4.01E-11  |
| TBL1X   | rs60822569  | 12 | 54323724  | C | T | 0.55 | 0.07  | 0.01 | 2.91E-08  |
| TCL1A   | rs301816    | 1  | 8444998   | A | G | 0.59 | -0.05 | 0.01 | 8.86E-06  |
| TCL1A   | rs17361097  | 4  | 152080067 | A | G | 0.44 | 0.05  | 0.01 | 7.35E-06  |
| TCL1A   | rs10689049  | 5  | 88824262  | T | C | 0.31 | 0.06  | 0.01 | 9.69E-08  |
| TCL1A   | rs77018303  | 5  | 143812499 | T | G | 0.02 | -0.22 | 0.03 | 2.27E-07  |
| TCL1A   | rs17056273  | 5  | 158822119 | C | T | 0.08 | -0.20 | 0.01 | 3.35E-23  |
| TCL1A   | rs34907473  | 6  | 31344161  | G | A | 0.28 | -0.08 | 0.01 | 6.75E-10  |
| TCL1A   | rs652951    | 6  | 44596271  | A | C | 0.49 | -0.05 | 0.01 | 3.12E-06  |
| TCL1A   | rs9483788   | 6  | 135114363 | C | T | 0.26 | -0.07 | 0.01 | 8.41E-09  |

|       |             |    |           |   |   |      |       |      |           |
|-------|-------------|----|-----------|---|---|------|-------|------|-----------|
| TCL1A | -           | 7  | 26867540  | T | A | 0.27 | -0.05 | 0.01 | 2.18E-05  |
| TCL1A | -           | 7  | 39959783  | A | T | 0.36 | -0.05 | 0.01 | 6.21E-06  |
| TCL1A | rs116968179 | 7  | 50149587  | A | G | 0.03 | -0.14 | 0.02 | 7.24E-06  |
| TCL1A | rs1433577   | 8  | 129583635 | A | G | 0.27 | -0.08 | 0.01 | 1.67E-11  |
| TCL1A | rs4948492   | 10 | 61959980  | T | C | 0.66 | -0.07 | 0.01 | 2.26E-10  |
| TCL1A | rs12784975  | 10 | 96620380  | C | T | 0.19 | -0.08 | 0.01 | 3.30E-08  |
| TCL1A | rs112170428 | 11 | 14435383  | A | G | 0.26 | -0.05 | 0.01 | 2.78E-05  |
| TCL1A | rs76428106  | 13 | 28029870  | C | T | 0.01 | 0.22  | 0.03 | 1.49E-05  |
| TCL1A | rs78986913  | 14 | 95696081  | A | G | 0.04 | -0.71 | 0.02 | 4.31E-149 |
| TCL1A | rs11853271  | 15 | 90482598  | A | G | 0.32 | 0.06  | 0.01 | 1.44E-06  |
| TCL1A | rs13330176  | 16 | 85985481  | A | T | 0.24 | 0.09  | 0.01 | 1.80E-11  |
| TCL1A | rs12947321  | 17 | 2816578   | G | A | 0.49 | -0.06 | 0.01 | 4.59E-08  |
| TCL1A | rs35222145  | 17 | 39851068  | G | T | 0.49 | -0.10 | 0.01 | 3.43E-20  |
| TCL1A | rs6065926   | 20 | 46107215  | G | A | 0.75 | -0.06 | 0.01 | 1.80E-05  |
| TCL1A | rs75743846  | 22 | 41929013  | A | G | 0.02 | -0.20 | 0.03 | 3.73E-06  |
| TCN2  | -           | 9  | 133263362 | G | A | 0.18 | -0.06 | 0.01 | 1.30E-07  |
| TCN2  | rs150384171 | 19 | 8305034   | A | C | 0.01 | 1.23  | 0.03 | 6.79E-197 |
| TCN2  | rs12986064  | 19 | 54251270  | C | T | 0.51 | -0.07 | 0.01 | 1.28E-12  |
| TCN2  | rs740234    | 22 | 30612758  | G | A | 0.20 | 0.63  | 0.01 | 0.00E+00  |
| TDGF1 | rs112481213 | 3  | 46577748  | A | T | 0.24 | 1.32  | 0.01 | 0.00E+00  |
| TDGF1 | rs113354603 | 9  | 114323961 | A | G | 0.07 | -0.07 | 0.01 | 2.33E-05  |
| TDGF1 | rs507666    | 9  | 133273983 | A | G | 0.18 | -0.05 | 0.01 | 6.43E-08  |
| TDRKH | rs4845556   | 1  | 151772382 | A | G | 0.48 | 0.31  | 0.01 | 9.14E-165 |
| TDRKH | rs1354034   | 3  | 56815721  | C | T | 0.60 | 0.06  | 0.01 | 2.78E-07  |
| TDRKH | rs6993770   | 8  | 105569300 | T | A | 0.29 | -0.07 | 0.01 | 8.15E-08  |
| TDRKH | rs7080386   | 10 | 63288546  | A | C | 0.41 | 0.05  | 0.01 | 4.07E-06  |
| TEK   | rs74816838  | 1  | 161673770 | T | C | 0.17 | 0.07  | 0.01 | 2.34E-06  |
| TEK   | rs10935473  | 3  | 98698056  | T | G | 0.44 | -0.07 | 0.01 | 5.03E-13  |
| TEK   | rs13107325  | 4  | 102267552 | T | C | 0.08 | 0.12  | 0.01 | 7.89E-10  |
| TEK   | rs1050518   | 6  | 31356864  | A | T | 0.30 | -0.22 | 0.01 | 3.47E-89  |
| TEK   | rs2134964   | 8  | 88385408  | G | A | 0.70 | -0.11 | 0.01 | 1.36E-22  |
| TEK   | rs682632    | 9  | 27183465  | C | A | 0.96 | -1.04 | 0.02 | 4.79E-296 |
| TEK   | rs8176759   | 9  | 133254260 | A | G | 0.06 | 0.81  | 0.02 | 4.57E-266 |
| TEK   | rs174530    | 11 | 61779120  | G | A | 0.37 | 0.04  | 0.01 | 2.69E-05  |
| TEK   | rs35166255  | 11 | 126431861 | A | G | 0.03 | 0.28  | 0.02 | 3.77E-25  |
| TEK   | rs1042704   | 14 | 22843385  | A | G | 0.22 | -0.10 | 0.01 | 9.45E-16  |
| TEK   | rs186021206 | 17 | 7166093   | A | G | 0.01 | 0.47  | 0.04 | 1.01E-11  |
| TFF1  | rs760077    | 1  | 155208991 | T | A | 0.60 | -0.10 | 0.01 | 2.18E-18  |
| TFF1  | rs62133344  | 2  | 68950137  | A | C | 0.06 | 0.41  | 0.02 | 2.23E-69  |
| TFF1  | rs2075842   | 11 | 1193830   | C | G | 0.42 | 0.07  | 0.01 | 1.39E-11  |
| TFF1  | rs536255    | 21 | 39638874  | T | C | 0.19 | -0.08 | 0.01 | 7.18E-09  |
| TFF1  | rs3761376   | 21 | 42366929  | A | G | 0.24 | -0.31 | 0.01 | 5.25E-128 |
| TFF2  | rs760077    | 1  | 155208991 | T | A | 0.60 | -0.10 | 0.01 | 1.38E-19  |
| TFF2  | rs11379990  | 3  | 12482550  | T | A | 0.50 | -0.08 | 0.01 | 6.80E-15  |
| TFF2  | -           | 4  | 48014421  | G | A | 0.38 | -0.06 | 0.01 | 6.52E-08  |
| TFF2  | rs2978981   | 8  | 142677719 | T | C | 0.44 | -0.05 | 0.01 | 6.96E-06  |
| TFF2  | rs2075842   | 11 | 1193830   | C | G | 0.42 | 0.11  | 0.01 | 2.33E-25  |
| TFF2  | rs2217142   | 13 | 48860499  | T | C | 0.58 | -0.07 | 0.01 | 4.19E-11  |
| TFF2  | rs186021206 | 17 | 7166093   | A | G | 0.01 | 0.71  | 0.05 | 7.53E-22  |
| TFF2  | rs601338    | 19 | 48703417  | A | G | 0.51 | -0.05 | 0.01 | 8.75E-06  |
| TFF2  | rs1534081   | 21 | 39651684  | G | A | 0.75 | 0.07  | 0.01 | 4.35E-08  |
| TFF2  | rs225344    | 21 | 42355775  | A | G | 0.73 | 0.12  | 0.01 | 5.74E-24  |
| TFF3  | rs9992101   | 4  | 76439278  | A | G | 0.41 | 0.05  | 0.01 | 1.52E-05  |
| TFF3  | rs2524277   | 6  | 31439802  | A | G | 0.06 | 0.60  | 0.02 | 9.30E-146 |
| TFF3  | rs118095917 | 21 | 42313518  | T | C | 0.01 | -1.25 | 0.04 | 5.15E-74  |
| TFPI  | rs12127364  | 1  | 169499904 | A | C | 0.27 | 0.14  | 0.01 | 3.64E-33  |

|       |             |    |           |   |   |      |       |      |           |
|-------|-------------|----|-----------|---|---|------|-------|------|-----------|
| TFPI  | rs1260326   | 2  | 27508073  | C | T | 0.61 | -0.05 | 0.01 | 1.22E-05  |
| TFPI  | rs7576066   | 2  | 187479054 | A | G | 0.29 | 0.35  | 0.01 | 1.76E-184 |
| TFPI  | rs562281690 | 3  | 90128763  | T | G | 0.00 | -0.49 | 0.07 | 9.31E-06  |
| TFPI  | rs528128538 | 3  | 93868695  | T | C | 0.00 | -0.45 | 0.06 | 7.27E-06  |
| TFPI  | rs28601761  | 8  | 125487789 | G | C | 0.42 | -0.06 | 0.01 | 3.47E-08  |
| TFPI  | rs1111796   | 9  | 114323946 | T | A | 0.08 | -0.17 | 0.01 | 4.42E-15  |
| TFPI  | -           | 10 | 19943243  | C | T | 0.58 | 0.08  | 0.01 | 1.24E-14  |
| TFPI  | rs7412      | 19 | 44908822  | T | C | 0.08 | -0.15 | 0.01 | 1.10E-14  |
| TFPI2 | rs61804208  | 1  | 161691621 | T | G | 0.10 | 0.14  | 0.01 | 7.76E-15  |
| TFPI2 | rs68066031  | 2  | 224015781 | C | T | 0.23 | 0.07  | 0.01 | 5.39E-08  |
| TFPI2 | rs1056523   | 3  | 126542364 | T | C | 0.25 | -0.14 | 0.01 | 2.65E-30  |
| TFPI2 | rs5879368   | 6  | 116269018 | A | T | 0.33 | -0.06 | 0.01 | 2.64E-06  |
| TFPI2 | rs6924387   | 6  | 136761810 | G | A | 0.41 | -0.06 | 0.01 | 2.97E-07  |
| TFPI2 | rs62466701  | 7  | 93956351  | C | T | 0.06 | 0.24  | 0.01 | 1.29E-24  |
| TFPI2 | rs10087526  | 8  | 54520591  | G | T | 0.20 | 0.09  | 0.01 | 6.43E-12  |
| TFPI2 | rs35719208  | 8  | 104954086 | T | C | 0.19 | 0.09  | 0.01 | 8.58E-12  |
| TFPI2 | rs5791751   | 11 | 47013006  | A | T | 0.67 | -0.08 | 0.01 | 6.36E-13  |
| TFPI2 | rs10842452  | 12 | 25050552  | A | C | 0.88 | -0.14 | 0.01 | 8.73E-17  |
| TFPI2 | rs2160725   | 17 | 68399585  | C | A | 0.48 | -0.06 | 0.01 | 1.80E-07  |
| TFRC  | rs766000481 | 1  | 205275030 | A | C | 0.36 | -0.05 | 0.01 | 5.93E-06  |
| TFRC  | rs3817672   | 3  | 196073940 | T | C | 0.56 | -0.52 | 0.01 | 0.00E+00  |
| TFRC  | rs252152    | 5  | 142066209 | G | A | 0.66 | 0.08  | 0.01 | 1.68E-12  |
| TFRC  | rs1800562   | 6  | 26092913  | A | G | 0.08 | -0.27 | 0.01 | 1.24E-44  |
| TFRC  | rs6592965   | 7  | 50360284  | A | G | 0.45 | -0.06 | 0.01 | 1.29E-08  |
| TFRC  | rs3211931   | 7  | 80668857  | T | C | 0.43 | -0.05 | 0.01 | 9.37E-06  |
| TFRC  | rs2075672   | 7  | 100642673 | G | A | 0.62 | -0.07 | 0.01 | 3.53E-10  |
| TFRC  | rs550057    | 9  | 133271182 | T | C | 0.26 | -0.10 | 0.01 | 1.95E-16  |
| TFRC  | rs560046267 | 10 | 45501143  | T | G | 0.31 | 0.05  | 0.01 | 4.33E-06  |
| TFRC  | rs11216316  | 11 | 117210784 | C | A | 0.10 | 0.23  | 0.01 | 1.43E-38  |
| TFRC  | rs74035509  | 16 | 88500925  | T | C | 0.08 | 0.09  | 0.01 | 2.07E-05  |
| TFRC  | rs59435462  | 17 | 45673555  | A | T | 0.76 | -0.06 | 0.01 | 5.73E-07  |
| TFRC  | rs2072860   | 22 | 37074564  | A | G | 0.53 | -0.14 | 0.01 | 2.16E-38  |
| TGFA  | rs17639251  | 2  | 70549149  | C | T | 0.12 | 0.17  | 0.01 | 1.28E-22  |
| TGFA  | rs7310615   | 12 | 111427245 | G | C | 0.52 | -0.07 | 0.01 | 8.17E-11  |
| TGFA  | rs11871747  | 17 | 40021029  | C | T | 0.39 | 0.08  | 0.01 | 4.00E-13  |
| TGFA  | rs62143194  | 19 | 53816370  | G | C | 0.21 | 0.06  | 0.01 | 2.25E-05  |
| TGFB1 | rs3804749   | 3  | 123114156 | T | C | 0.59 | -0.07 | 0.01 | 5.21E-10  |
| TGFB1 | rs4869313   | 5  | 96888176  | G | T | 0.55 | -0.09 | 0.01 | 2.57E-14  |
| TGFB1 | rs6796      | 7  | 6462736   | C | T | 0.28 | 0.06  | 0.01 | 1.98E-06  |
| TGFB1 | rs2544221   | 7  | 134308262 | C | G | 0.46 | 0.06  | 0.01 | 2.86E-08  |
| TGFB1 | rs6993770   | 8  | 105569300 | T | A | 0.29 | -0.14 | 0.01 | 4.02E-30  |
| TGFB1 | -           | 9  | 133276163 | T | A | 0.19 | -0.11 | 0.01 | 9.31E-15  |
| TGFB1 | rs7080386   | 10 | 63288546  | A | C | 0.41 | 0.05  | 0.01 | 1.65E-05  |
| TGFB1 | rs12762934  | 10 | 102600127 | T | C | 0.32 | 0.06  | 0.01 | 3.27E-07  |
| TGFB1 | rs7136223   | 12 | 29284928  | G | A | 0.28 | 0.08  | 0.01 | 1.03E-09  |
| TGFB1 | rs73045269  | 19 | 41319286  | T | C | 0.17 | 0.29  | 0.01 | 1.97E-83  |
| TGFB1 | rs892090    | 19 | 55027704  | G | T | 0.83 | 0.12  | 0.01 | 3.53E-14  |
| TGFB1 | rs2478539   | 1  | 230709026 | T | G | 0.40 | -0.25 | 0.01 | 1.01E-130 |
| TGFB1 | rs11127048  | 2  | 27529596  | A | G | 0.62 | -0.06 | 0.01 | 5.85E-09  |
| TGFB1 | rs13159365  | 5  | 136053744 | T | C | 0.51 | -0.54 | 0.01 | 0.00E+00  |
| TGFB1 | rs9268812   | 6  | 32456791  | G | A | 0.66 | 0.07  | 0.01 | 1.37E-10  |
| TGFB1 | rs10645152  | 7  | 77233094  | T | G | 0.74 | -0.11 | 0.01 | 9.70E-23  |
| TGFB1 | rs28601761  | 8  | 125487789 | G | C | 0.42 | -0.06 | 0.01 | 6.95E-09  |
| TGFB1 | rs10982156  | 9  | 114325784 | A | T | 0.07 | -0.44 | 0.01 | 4.06E-99  |
| TGFB1 | rs56278466  | 10 | 17833858  | G | T | 0.66 | 0.06  | 0.01 | 7.39E-08  |
| TGFB1 | rs28929474  | 14 | 94378610  | T | C | 0.02 | 0.20  | 0.02 | 4.88E-08  |

|        |             |    |           |   |   |      |       |      |           |
|--------|-------------|----|-----------|---|---|------|-------|------|-----------|
| TGFBI  | rs116683462 | 17 | 59774420  | T | A | 0.54 | 0.08  | 0.01 | 9.31E-14  |
| TGFBI  | rs12975366  | 19 | 54255498  | C | T | 0.39 | -0.06 | 0.01 | 9.49E-10  |
| TGFBR2 | rs61747728  | 1  | 179557079 | T | C | 0.04 | 0.19  | 0.02 | 1.32E-11  |
| TGFBR2 | rs1260326   | 2  | 27508073  | C | T | 0.61 | 0.05  | 0.01 | 1.73E-06  |
| TGFBR2 | rs75166367  | 2  | 162107791 | A | G | 0.06 | -0.11 | 0.01 | 5.98E-06  |
| TGFBR2 | rs143048713 | 3  | 46851683  | T | G | 0.10 | 0.08  | 0.01 | 2.58E-05  |
| TGFBR2 | rs3129887   | 6  | 32442914  | A | G | 0.19 | 0.09  | 0.01 | 5.35E-10  |
| TGFBR2 | rs10265221  | 7  | 151717243 | C | T | 0.29 | 0.06  | 0.01 | 6.45E-06  |
| TGFBR2 | rs507666    | 9  | 133273983 | A | G | 0.18 | -0.17 | 0.01 | 8.99E-34  |
| TGFBR2 | rs777834943 | 16 | 20355409  | T | C | 0.18 | -0.08 | 0.01 | 1.30E-08  |
| TGFBR2 | rs2837988   | 21 | 41247617  | A | C | 0.36 | 0.05  | 0.01 | 1.25E-05  |
| TGFBR3 | rs11207423  | 1  | 59185157  | C | G | 0.28 | 0.10  | 0.01 | 9.48E-15  |
| TGFBR3 | rs2634023   | 1  | 91858593  | T | C | 0.08 | -0.23 | 0.01 | 4.34E-29  |
| TGFBR3 | rs150816167 | 1  | 179602727 | C | T | 0.04 | 0.14  | 0.02 | 6.03E-07  |
| TGFBR3 | rs4253311   | 4  | 186253529 | G | A | 0.51 | -0.08 | 0.01 | 2.10E-11  |
| TGFBR3 | rs181242111 | 10 | 17823665  | A | G | 0.12 | 0.10  | 0.01 | 3.21E-07  |
| TGFBR3 | rs4997081   | 16 | 20353912  | C | G | 0.19 | -0.07 | 0.01 | 4.45E-07  |
| TGFBR3 | rs1236213   | 21 | 27105423  | T | G | 0.59 | -0.16 | 0.01 | 4.01E-43  |
| TGM2   | rs539726870 | 6  | 32638754  | G | A | 0.12 | -0.13 | 0.01 | 3.67E-12  |
| TGM2   | rs6592965   | 7  | 50360284  | A | G | 0.45 | 0.06  | 0.01 | 1.19E-07  |
| TGM2   | rs757944190 | 17 | 28833612  | C | A | 0.26 | 0.06  | 0.01 | 1.46E-06  |
| TGM2   | rs2235582   | 20 | 38165738  | G | A | 0.63 | 0.17  | 0.01 | 1.44E-50  |
| THBD   | rs7532110   | 1  | 47496292  | A | T | 0.80 | 0.07  | 0.01 | 1.67E-06  |
| THBD   | rs61747728  | 1  | 179557079 | T | C | 0.04 | 0.18  | 0.02 | 7.09E-10  |
| THBD   | rs1260326   | 2  | 27508073  | C | T | 0.61 | 0.05  | 0.01 | 6.06E-06  |
| THBD   | rs75166367  | 2  | 162107791 | A | G | 0.06 | -0.11 | 0.01 | 2.35E-06  |
| THBD   | rs56387622  | 3  | 46846708  | C | T | 0.10 | 0.08  | 0.01 | 2.61E-05  |
| THBD   | rs638333    | 5  | 73123440  | C | T | 0.29 | 0.07  | 0.01 | 7.04E-09  |
| THBD   | rs9264666   | 6  | 31271519  | C | G | 0.55 | -0.06 | 0.01 | 2.89E-08  |
| THBD   | rs1137827   | 9  | 133254328 | T | C | 0.06 | 0.33  | 0.01 | 8.61E-48  |
| THBD   | rs34434834  | 11 | 126437901 | A | G | 0.03 | 0.25  | 0.02 | 4.52E-16  |
| THBD   | rs12442366  | 15 | 101233358 | A | G | 0.38 | 0.05  | 0.01 | 4.47E-06  |
| THBD   | rs77924615  | 16 | 20381010  | A | G | 0.20 | -0.08 | 0.01 | 1.33E-08  |
| THBD   | rs186021206 | 17 | 7166093   | A | G | 0.01 | 0.40  | 0.05 | 9.24E-08  |
| THBD   | rs2659005   | 17 | 81244914  | T | C | 0.44 | 0.07  | 0.01 | 2.58E-09  |
| THBD   | rs33950747  | 19 | 35848345  | T | C | 0.08 | 0.15  | 0.01 | 1.90E-12  |
| THBD   | rs1042579   | 20 | 23048087  | A | G | 0.19 | 0.20  | 0.01 | 1.85E-45  |
| THBS2  | rs2271708   | 5  | 40936439  | C | T | 0.01 | -0.34 | 0.05 | 1.57E-06  |
| THBS2  | rs78109196  | 6  | 169224606 | A | C | 0.10 | 0.66  | 0.01 | 5.45E-265 |
| THBS2  | rs3967200   | 11 | 126362490 | T | C | 0.14 | -0.12 | 0.01 | 2.10E-13  |
| THBS2  | rs531745895 | 14 | 68777300  | T | G | 0.34 | -0.05 | 0.01 | 4.83E-06  |
| THBS2  | rs186021206 | 17 | 7166093   | A | G | 0.01 | 0.57  | 0.05 | 2.15E-14  |
| THBS2  | rs146385050 | 17 | 62559897  | A | C | 0.18 | 0.23  | 0.01 | 5.36E-63  |
| THBS2  | rs2111504   | 19 | 32426549  | A | T | 0.17 | 0.14  | 0.01 | 2.99E-23  |
| THBS2  | rs738409    | 22 | 43928847  | G | C | 0.22 | 0.07  | 0.01 | 5.99E-08  |
| THBS4  | rs2438632   | 5  | 80096370  | T | G | 0.40 | 0.24  | 0.01 | 1.66E-99  |
| THBS4  | rs2881756   | 7  | 7216809   | T | C | 0.41 | 0.07  | 0.01 | 5.47E-11  |
| THBS4  | rs8176719   | 9  | 133257521 | C | T | 0.34 | 0.05  | 0.01 | 1.49E-05  |
| THBS4  | rs56278466  | 10 | 17833858  | G | T | 0.66 | 0.09  | 0.01 | 1.00E-15  |
| THBS4  | rs112771035 | 11 | 126355981 | G | C | 0.07 | -0.13 | 0.01 | 4.67E-10  |
| THBS4  | rs186021206 | 17 | 7166093   | A | G | 0.01 | 1.34  | 0.05 | 1.85E-70  |
| THOP1  | rs2741990   | 19 | 2796646   | T | C | 0.29 | 0.26  | 0.01 | 8.98E-107 |
| THPO   | rs2305637   | 3  | 47004356  | T | C | 0.18 | -0.08 | 0.01 | 1.88E-07  |
| THPO   | rs113926195 | 3  | 58237678  | C | G | 0.23 | -0.06 | 0.01 | 4.06E-06  |
| THPO   | rs6141      | 3  | 184372478 | T | C | 0.53 | 0.06  | 0.01 | 8.27E-08  |
| THPO   | rs11242109  | 5  | 132341354 | T | G | 0.48 | -0.06 | 0.01 | 3.02E-07  |



|       |             |    |           |   |   |      |       |      |           |
|-------|-------------|----|-----------|---|---|------|-------|------|-----------|
| THPO  | rs10224886  | 7  | 38202565  | A | T | 0.25 | -0.12 | 0.01 | 1.04E-20  |
| THPO  | rs6993770   | 8  | 105569300 | T | A | 0.29 | -0.13 | 0.01 | 4.01E-24  |
| THPO  | rs10740118  | 10 | 63341447  | C | G | 0.41 | 0.08  | 0.01 | 6.09E-11  |
| THPO  | rs10762489  | 10 | 71891700  | G | A | 0.22 | 0.07  | 0.01 | 2.04E-06  |
| THPO  | rs56385468  | 11 | 1773446   | G | T | 0.09 | -0.21 | 0.01 | 2.10E-25  |
| THPO  | rs1362213   | 12 | 6173262   | T | C | 0.48 | -0.07 | 0.01 | 1.50E-08  |
| THPO  | rs2015599   | 12 | 29282547  | A | G | 0.46 | -0.05 | 0.01 | 4.87E-06  |
| THPO  | rs6580981   | 12 | 54329244  | A | G | 0.46 | 0.06  | 0.01 | 2.16E-06  |
| THPO  | -           | 12 | 101891200 | A | G | 0.50 | 0.05  | 0.01 | 2.65E-05  |
| THPO  | rs28929474  | 14 | 94378610  | T | C | 0.02 | 0.35  | 0.03 | 7.94E-19  |
| THPO  | rs151234    | 16 | 28494339  | C | G | 0.13 | 0.08  | 0.01 | 4.23E-06  |
| THPO  | rs12445050  | 16 | 81837364  | T | C | 0.14 | 0.08  | 0.01 | 5.25E-06  |
| THPO  | rs149394327 | 17 | 66232877  | C | G | 0.03 | 0.16  | 0.02 | 4.55E-06  |
| THPO  | rs1654425   | 19 | 55027612  | C | T | 0.83 | 0.10  | 0.01 | 4.00E-11  |
| THY1  | rs603424    | 10 | 100315722 | A | G | 0.17 | -0.08 | 0.01 | 1.08E-07  |
| THY1  | rs55933700  | 11 | 119423203 | T | G | 0.02 | -1.08 | 0.02 | 3.06E-181 |
| THY1  | rs186021206 | 17 | 7166093   | A | G | 0.01 | 0.35  | 0.05 | 3.54E-06  |
| TIA1  | rs1354034   | 3  | 56815721  | C | T | 0.60 | 0.09  | 0.01 | 3.92E-13  |
| TIA1  | rs17622656  | 5  | 132485305 | A | G | 0.39 | -0.05 | 0.01 | 2.59E-05  |
| TIA1  | -           | 10 | 63156270  | A | T | 0.49 | 0.05  | 0.01 | 2.52E-05  |
| TIA1  | rs11502185  | 11 | 180258    | C | T | 0.26 | 0.07  | 0.01 | 1.12E-06  |
| TIA1  | rs60822569  | 12 | 54323724  | C | T | 0.55 | 0.06  | 0.01 | 9.94E-07  |
| TIE1  | rs4660729   | 1  | 43302229  | G | C | 0.61 | 0.19  | 0.01 | 4.89E-68  |
| TIE1  | rs10935473  | 3  | 98698056  | T | G | 0.44 | -0.22 | 0.01 | 1.04E-92  |
| TIE1  | rs2962006   | 5  | 58152249  | C | G | 0.39 | -0.05 | 0.01 | 3.80E-06  |
| TIE1  | rs9271325   | 6  | 32614736  | G | C | 0.47 | -0.06 | 0.01 | 3.39E-07  |
| TIE1  | rs4841133   | 8  | 9326154   | G | A | 0.91 | -0.09 | 0.01 | 8.41E-07  |
| TIE1  | rs8176746   | 9  | 133255935 | T | G | 0.06 | 0.89  | 0.02 | 0.00E+00  |
| TIE1  | rs56278466  | 10 | 17833858  | G | T | 0.66 | 0.07  | 0.01 | 7.66E-09  |
| TIE1  | rs174564    | 11 | 61820833  | G | A | 0.35 | 0.06  | 0.01 | 2.48E-07  |
| TIE1  | rs34434834  | 11 | 126437901 | A | G | 0.03 | 0.16  | 0.02 | 2.06E-07  |
| TIE1  | rs2283464   | 16 | 100766    | A | G | 0.85 | -0.14 | 0.01 | 2.72E-20  |
| TIE1  | rs186021206 | 17 | 7166093   | A | G | 0.01 | 0.52  | 0.05 | 1.86E-12  |
| TIE1  | rs4015      | 19 | 48750132  | T | C | 0.20 | -0.07 | 0.01 | 1.16E-06  |
| TIGAR | rs3217860   | 12 | 4289884   | G | A | 0.25 | -0.07 | 0.01 | 2.10E-06  |
| TIGAR | rs4632248   | 19 | 53821741  | T | G | 0.21 | 0.07  | 0.01 | 4.78E-07  |
| TIMD4 | rs1060622   | 1  | 93154836  | A | G | 0.62 | 0.07  | 0.01 | 1.22E-09  |
| TIMD4 | rs12145753  | 1  | 234960192 | T | C | 0.35 | 0.05  | 0.01 | 3.93E-06  |
| TIMD4 | rs10189685  | 2  | 202623726 | A | G | 0.30 | 0.12  | 0.01 | 1.51E-24  |
| TIMD4 | rs67833823  | 2  | 231361235 | A | G | 0.16 | 0.07  | 0.01 | 6.43E-06  |
| TIMD4 | rs11395592  | 3  | 69793190  | T | A | 0.43 | -0.05 | 0.01 | 1.78E-05  |
| TIMD4 | rs371216559 | 3  | 155820016 | T | C | 0.27 | -0.07 | 0.01 | 7.91E-08  |
| TIMD4 | rs115216147 | 5  | 71369699  | A | T | 0.07 | 0.11  | 0.01 | 1.36E-06  |
| TIMD4 | rs38029     | 5  | 97017519  | G | C | 0.56 | -0.07 | 0.01 | 3.10E-09  |
| TIMD4 | rs4704826   | 5  | 156965071 | A | C | 0.64 | -0.23 | 0.01 | 1.13E-93  |
| TIMD4 | rs9270270   | 6  | 32589431  | C | T | 0.84 | -0.15 | 0.01 | 9.52E-23  |
| TIMD4 | rs10456852  | 6  | 105908171 | T | C | 0.13 | 0.10  | 0.01 | 1.57E-10  |
| TIMD4 | rs2737245   | 8  | 115646356 | T | G | 0.28 | 0.06  | 0.01 | 4.78E-06  |
| TIMD4 | rs2142306   | 8  | 133458388 | C | T | 0.41 | 0.06  | 0.01 | 9.67E-09  |
| TIMD4 | rs9411378   | 9  | 133270015 | A | C | 0.22 | 0.10  | 0.01 | 2.48E-14  |
| TIMD4 | rs2068888   | 10 | 93079885  | A | G | 0.45 | 0.06  | 0.01 | 3.28E-08  |
| TIMD4 | rs72823014  | 10 | 114026477 | A | G | 0.13 | 0.08  | 0.01 | 1.28E-06  |
| TIMD4 | -           | 11 | 44570719  | T | A | 0.78 | 0.07  | 0.01 | 7.50E-08  |
| TIMD4 | rs10769256  | 11 | 47356845  | T | C | 0.40 | -0.06 | 0.01 | 1.34E-08  |
| TIMD4 | rs112771035 | 11 | 126355981 | G | C | 0.07 | 0.49  | 0.01 | 3.86E-120 |
| TIMD4 | rs34623398  | 12 | 29336225  | T | C | 0.28 | 0.08  | 0.01 | 6.10E-11  |

|         |             |    |           |   |   |      |       |      |           |
|---------|-------------|----|-----------|---|---|------|-------|------|-----------|
| TIMD4   | rs10778118  | 12 | 101430728 | T | C | 0.79 | -0.07 | 0.01 | 1.42E-07  |
| TIMD4   | -           | 16 | 56967362  | A | C | 0.34 | 0.05  | 0.01 | 6.78E-06  |
| TIMD4   | rs34417180  | 16 | 72185857  | A | C | 0.17 | -0.07 | 0.01 | 4.46E-06  |
| TIMD4   | rs4843861   | 16 | 85917370  | T | A | 0.27 | -0.07 | 0.01 | 9.78E-09  |
| TIMD4   | rs186021206 | 17 | 7166093   | A | G | 0.01 | 1.14  | 0.05 | 1.07E-54  |
| TIMD4   | rs77542162  | 17 | 69085137  | G | A | 0.02 | 0.16  | 0.02 | 1.99E-05  |
| TIMD4   | rs601338    | 19 | 48703417  | A | G | 0.51 | 0.05  | 0.01 | 1.13E-05  |
| TIMD4   | -           | 20 | 35545566  | T | A | 0.14 | 0.11  | 0.01 | 1.10E-12  |
| TIMD4   | rs2143876   | 20 | 40490434  | C | T | 0.14 | 0.09  | 0.01 | 3.08E-08  |
| TIMD4   | rs66817580  | 21 | 41317710  | T | G | 0.15 | 0.16  | 0.01 | 1.29E-25  |
| TIMP1   | rs1775815   | 1  | 117606208 | T | G | 0.57 | 0.07  | 0.01 | 1.79E-08  |
| TIMP1   | rs12407843  | 1  | 156903935 | A | G | 0.11 | 0.09  | 0.01 | 3.43E-07  |
| TIMP1   | rs9380143   | 6  | 29834268  | T | C | 0.28 | -0.10 | 0.01 | 7.04E-15  |
| TIMP1   | rs6993770   | 8  | 105569300 | T | A | 0.29 | -0.11 | 0.01 | 8.67E-20  |
| TIMP1   | rs1654425   | 19 | 55027612  | C | T | 0.83 | 0.11  | 0.01 | 1.09E-13  |
| TIMP3   | rs2274319   | 1  | 156481081 | C | T | 0.65 | -0.06 | 0.01 | 1.47E-08  |
| TIMP3   | rs13412535  | 2  | 224010157 | A | G | 0.23 | -0.06 | 0.01 | 2.60E-06  |
| TIMP3   | rs1354034   | 3  | 56815721  | C | T | 0.60 | -0.05 | 0.01 | 7.38E-06  |
| TIMP3   | rs11734099  | 4  | 6889708   | A | G | 0.17 | 0.08  | 0.01 | 4.56E-09  |
| TIMP3   | rs755492124 | 4  | 101856385 | T | G | 0.39 | -0.05 | 0.01 | 3.73E-06  |
| TIMP3   | rs114694170 | 5  | 88884379  | C | T | 0.06 | 0.16  | 0.01 | 1.08E-13  |
| TIMP3   | -           | 5  | 132328823 | T | A | 0.63 | -0.05 | 0.01 | 1.48E-05  |
| TIMP3   | rs11953411  | 5  | 151418773 | A | G | 0.61 | -0.06 | 0.01 | 2.05E-08  |
| TIMP3   | rs12190479  | 6  | 132512815 | C | G | 0.20 | -0.06 | 0.01 | 1.19E-05  |
| TIMP3   | rs6961069   | 7  | 80589645  | T | C | 0.40 | 0.05  | 0.01 | 5.33E-06  |
| TIMP3   | rs61469632  | 9  | 132986603 | C | T | 0.06 | -0.13 | 0.01 | 2.48E-09  |
| TIMP3   | rs7896518   | 10 | 63344740  | G | A | 0.42 | 0.08  | 0.01 | 1.18E-14  |
| TIMP3   | rs17655730  | 11 | 270715    | C | T | 0.25 | 0.06  | 0.01 | 6.40E-06  |
| TIMP3   | rs1362213   | 12 | 6173262   | T | C | 0.48 | -0.05 | 0.01 | 1.04E-05  |
| TIMP3   | rs12445050  | 16 | 81837364  | T | C | 0.14 | 0.09  | 0.01 | 6.19E-09  |
| TIMP3   | rs74035509  | 16 | 88500925  | T | C | 0.08 | 0.08  | 0.01 | 1.92E-05  |
| TIMP3   | rs892090    | 19 | 55027704  | G | T | 0.83 | 0.14  | 0.01 | 5.73E-23  |
| TIMP3   | rs6081569   | 20 | 19323142  | C | G | 0.37 | 0.05  | 0.01 | 7.96E-06  |
| TIMP3   | rs5749504   | 22 | 32766845  | T | C | 0.73 | -0.65 | 0.01 | 0.00E+00  |
| TIMP4   | rs2943649   | 2  | 226240975 | G | C | 0.65 | -0.06 | 0.01 | 1.82E-07  |
| TIMP4   | rs184262    | 3  | 12093240  | G | A | 0.83 | 0.45  | 0.01 | 6.31E-215 |
| TIMP4   | rs34579624  | 6  | 32662342  | A | G | 0.15 | 0.09  | 0.01 | 9.15E-08  |
| TIMP4   | rs1358980   | 6  | 43796814  | T | C | 0.48 | -0.06 | 0.01 | 2.80E-07  |
| TIMP4   | rs1716403   | 12 | 124035299 | C | T | 0.68 | -0.05 | 0.01 | 4.46E-06  |
| TIMP4   | rs12986064  | 19 | 54251270  | C | T | 0.51 | -0.05 | 0.01 | 1.49E-05  |
| TINAGL1 | rs78265569  | 1  | 2214726   | A | C | 0.09 | -0.09 | 0.01 | 2.47E-05  |
| TINAGL1 | rs2229474   | 1  | 21855622  | A | G | 0.01 | 0.61  | 0.03 | 1.36E-38  |
| TINAGL1 | rs945214    | 1  | 31581704  | G | A | 0.61 | -0.09 | 0.01 | 4.14E-13  |
| TINAGL1 | rs7648959   | 3  | 159844708 | G | A | 0.30 | 0.09  | 0.01 | 2.61E-13  |
| TINAGL1 | rs1694889   | 3  | 192954103 | C | G | 0.51 | 0.05  | 0.01 | 1.65E-05  |
| TINAGL1 | rs56278466  | 10 | 17833858  | G | T | 0.66 | 0.06  | 0.01 | 2.46E-07  |
| TINAGL1 | rs7137828   | 12 | 111494996 | T | C | 0.52 | -0.05 | 0.01 | 1.45E-06  |
| TINAGL1 | rs9583474   | 13 | 110243053 | C | A | 0.21 | -0.08 | 0.01 | 5.25E-08  |
| TINAGL1 | rs6143024   | 20 | 62339173  | G | A | 0.24 | -0.06 | 0.01 | 1.45E-06  |
| TJAP1   | rs1354034   | 3  | 56815721  | C | T | 0.60 | 0.06  | 0.01 | 3.48E-08  |
| TJAP1   | rs549884121 | 6  | 43547784  | A | C | 0.01 | -0.32 | 0.05 | 1.32E-05  |
| TLR3    | rs61804206  | 1  | 161689031 | G | A | 0.11 | 0.04  | 0.01 | 1.12E-05  |
| TLR3    | rs3775291   | 4  | 186082920 | T | C | 0.30 | -1.15 | 0.01 | 0.00E+00  |
| TLR3    | rs635634    | 9  | 133279427 | T | C | 0.18 | -0.04 | 0.00 | 4.60E-08  |
| TLR3    | rs56278466  | 10 | 17833858  | G | T | 0.66 | 0.04  | 0.00 | 1.48E-12  |
| TLR3    | rs4760      | 19 | 43648948  | G | A | 0.16 | 0.08  | 0.01 | 1.48E-26  |

|           |             |    |           |   |   |      |       |      |           |
|-----------|-------------|----|-----------|---|---|------|-------|------|-----------|
| TLR3      | rs738409    | 22 | 43928847  | G | C | 0.22 | 0.06  | 0.00 | 1.15E-15  |
| TMPRSS15  | rs11134475  | 5  | 156972939 | G | A | 0.64 | 0.08  | 0.01 | 1.20E-10  |
| TMPRSS15  | rs59922816  | 8  | 41520778  | C | T | 0.11 | 0.10  | 0.01 | 1.37E-07  |
| TMPRSS15  | rs550057    | 9  | 133271182 | T | C | 0.26 | -0.21 | 0.01 | 3.35E-57  |
| TMPRSS15  | rs708686    | 19 | 5840608   | T | C | 0.27 | 0.11  | 0.01 | 4.29E-18  |
| TMPRSS15  | rs438811    | 19 | 44913484  | T | C | 0.24 | 0.06  | 0.01 | 2.33E-05  |
| TMPRSS15  | rs492602    | 19 | 48703160  | G | A | 0.51 | -0.18 | 0.01 | 7.21E-58  |
| TMPRSS15  | rs2824805   | 21 | 18398417  | C | G | 0.17 | 0.13  | 0.01 | 6.79E-18  |
| TMPRSS5   | rs35383942  | 1  | 201468704 | T | C | 0.06 | 0.13  | 0.01 | 3.08E-11  |
| TMPRSS5   | rs12024555  | 1  | 221974503 | A | G | 0.19 | 0.05  | 0.01 | 8.73E-06  |
| TMPRSS5   | rs199927946 | 2  | 111993137 | T | G | 0.62 | 0.04  | 0.01 | 1.95E-05  |
| TMPRSS5   | rs1371687   | 3  | 98886146  | G | A | 0.34 | -0.05 | 0.01 | 2.28E-07  |
| TMPRSS5   | rs67670470  | 3  | 152612950 | A | C | 0.34 | 0.05  | 0.01 | 1.10E-06  |
| TMPRSS5   | rs4686658   | 3  | 194005178 | T | C | 0.78 | -0.05 | 0.01 | 2.30E-06  |
| TMPRSS5   | rs60028714  | 4  | 85472147  | T | C | 0.62 | -0.06 | 0.01 | 1.05E-09  |
| TMPRSS5   | rs9386298   | 6  | 96039693  | T | A | 0.50 | 0.05  | 0.01 | 1.32E-06  |
| TMPRSS5   | -           | 7  | 43781353  | C | T | 0.21 | 0.05  | 0.01 | 1.37E-05  |
| TMPRSS5   | rs17326497  | 9  | 33111688  | A | G | 0.07 | -0.14 | 0.01 | 1.20E-14  |
| TMPRSS5   | rs56278466  | 10 | 17833858  | G | T | 0.66 | 0.07  | 0.01 | 1.40E-11  |
| TMPRSS5   | rs10887793  | 10 | 88231148  | T | G | 0.45 | 0.05  | 0.01 | 7.10E-08  |
| TMPRSS5   | rs7114195   | 11 | 113690699 | C | A | 0.64 | 0.78  | 0.01 | 0.00E+00  |
| TMPRSS5   | rs68055275  | 11 | 126369248 | T | C | 0.14 | -0.09 | 0.01 | 5.69E-08  |
| TMPRSS5   | rs28404455  | 13 | 50241222  | C | T | 0.09 | 0.08  | 0.01 | 5.10E-07  |
| TMPRSS5   | rs72681869  | 14 | 50188639  | C | G | 0.01 | 0.20  | 0.03 | 6.94E-06  |
| TMPRSS5   | rs3742780   | 14 | 75038305  | C | G | 0.48 | -0.05 | 0.01 | 2.22E-08  |
| TMPRSS5   | rs12912843  | 15 | 50707136  | G | T | 0.12 | 0.08  | 0.01 | 1.53E-08  |
| TMPRSS5   | rs186021206 | 17 | 7166093   | A | G | 0.01 | 0.56  | 0.04 | 1.37E-18  |
| TMPRSS5   | rs504549    | 19 | 36946299  | T | C | 0.38 | -0.05 | 0.01 | 8.98E-07  |
| TMPRSS5   | rs2836683   | 21 | 38825514  | C | T | 0.34 | 0.04  | 0.01 | 2.41E-05  |
| TMSB10    | rs1354034   | 3  | 56815721  | C | T | 0.60 | 0.06  | 0.01 | 1.84E-06  |
| TMSB10    | rs342293    | 7  | 106731773 | G | C | 0.46 | -0.06 | 0.01 | 1.29E-06  |
| TMSB10    | rs6993770   | 8  | 105569300 | T | A | 0.29 | -0.06 | 0.01 | 7.90E-06  |
| TMSB10    | rs4746204   | 10 | 63568758  | T | C | 0.48 | -0.05 | 0.01 | 2.93E-06  |
| TMSB10    | rs11502185  | 11 | 180258    | C | T | 0.26 | 0.07  | 0.01 | 1.02E-06  |
| TMSB10    | rs10774624  | 12 | 111395984 | A | G | 0.51 | -0.06 | 0.01 | 6.13E-07  |
| TMSB10    | rs4632248   | 19 | 53821741  | T | G | 0.21 | 0.13  | 0.01 | 4.99E-20  |
| TNC       | rs4655585   | 1  | 65689944  | C | T | 0.37 | -0.05 | 0.01 | 5.67E-06  |
| TNC       | rs2646260   | 2  | 237369152 | G | A | 0.24 | -0.06 | 0.01 | 7.61E-06  |
| TNC       | rs4686846   | 3  | 187054623 | T | C | 0.23 | 0.07  | 0.01 | 1.81E-07  |
| TNC       | rs13135092  | 4  | 102276925 | G | A | 0.08 | 0.08  | 0.01 | 2.11E-05  |
| TNC       | rs13159365  | 5  | 136053744 | T | C | 0.51 | 0.20  | 0.01 | 1.13E-75  |
| TNC       | rs113760175 | 6  | 22343363  | A | G | 0.07 | 0.10  | 0.01 | 4.14E-06  |
| TNC       | rs1990790   | 7  | 130393789 | T | C | 0.51 | -0.05 | 0.01 | 2.04E-06  |
| TNC       | rs2685412   | 8  | 27953086  | G | C | 0.27 | 0.38  | 0.01 | 5.25E-204 |
| TNC       | rs4263799   | 8  | 71482756  | T | C | 0.48 | 0.08  | 0.01 | 2.68E-12  |
| TNC       | rs112286501 | 8  | 99015365  | T | C | 0.04 | 0.14  | 0.02 | 1.39E-07  |
| TNC       | rs7021057   | 9  | 115135714 | C | T | 0.29 | -0.24 | 0.01 | 4.13E-94  |
| TNC       | rs7949566   | 11 | 126415406 | A | G | 0.42 | 0.08  | 0.01 | 1.27E-12  |
| TNC       | rs9668810   | 12 | 26273487  | C | T | 0.74 | -0.08 | 0.01 | 3.92E-10  |
| TNC       | rs10411932  | 19 | 3470266   | C | T | 0.48 | -0.05 | 0.01 | 2.10E-05  |
| TNC       | rs760715    | 22 | 39466338  | C | T | 0.25 | 0.11  | 0.01 | 5.37E-16  |
| TNF       | rs4645843   | 6  | 31576785  | T | C | 0.00 | -1.42 | 0.11 | 8.52E-17  |
| TNF       | rs7161799   | 15 | 58478324  | T | C | 0.08 | 0.23  | 0.01 | 3.36E-27  |
| TNF       | rs3184504   | 12 | 111446804 | C | T | 0.52 | -0.11 | 0.01 | 6.44E-21  |
| TNFAIP8   | rs1035376   | 5  | 119312555 | A | G | 0.88 | 0.12  | 0.01 | 3.45E-11  |
| TNFRSF10A | rs79287178  | 3  | 172576710 | A | G | 0.03 | 0.25  | 0.02 | 2.69E-16  |

|           |             |    |           |   |   |      |       |      |           |
|-----------|-------------|----|-----------|---|---|------|-------|------|-----------|
| TNFRSF10A | rs1632984   | 6  | 29805615  | A | T | 0.85 | 0.06  | 0.01 | 8.53E-06  |
| TNFRSF10A | rs13278062  | 8  | 23225458  | T | G | 0.50 | -0.46 | 0.01 | 0.00E+00  |
| TNFRSF10A | rs3072826   | 17 | 68456500  | G | A | 0.36 | -0.05 | 0.01 | 3.48E-06  |
| TNFRSF10B | rs231996    | 3  | 172555945 | A | C | 0.76 | -0.06 | 0.01 | 2.38E-07  |
| TNFRSF10B | rs1105944   | 8  | 23027596  | G | A | 0.90 | 0.54  | 0.01 | 2.27E-212 |
| TNFRSF10B | rs3184504   | 12 | 111446804 | C | T | 0.52 | -0.05 | 0.01 | 1.66E-06  |
| TNFRSF10C | rs3917932   | 1  | 36478315  | G | C | 0.58 | -0.04 | 0.01 | 1.26E-06  |
| TNFRSF10C | rs3014874   | 1  | 153365467 | A | G | 0.26 | -0.04 | 0.01 | 2.29E-05  |
| TNFRSF10C | rs3762281   | 1  | 156334991 | G | A | 0.50 | 0.08  | 0.01 | 1.11E-18  |
| TNFRSF10C | rs5030738   | 1  | 161629864 | T | G | 0.02 | 0.20  | 0.02 | 8.17E-09  |
| TNFRSF10C | rs6723921   | 2  | 62304597  | G | A | 0.61 | 0.05  | 0.01 | 1.01E-06  |
| TNFRSF10C | rs10182318  | 2  | 196928580 | C | T | 0.90 | -0.09 | 0.01 | 5.89E-09  |
| TNFRSF10C | rs12497115  | 3  | 47178851  | T | C | 0.18 | 0.05  | 0.01 | 2.15E-05  |
| TNFRSF10C | rs3774315   | 3  | 172514196 | G | A | 0.27 | 0.08  | 0.01 | 5.41E-14  |
| TNFRSF10C | rs4690299   | 4  | 747685    | T | C | 0.50 | 0.04  | 0.01 | 2.07E-05  |
| TNFRSF10C | rs2249742   | 6  | 31272944  | T | C | 0.44 | 0.05  | 0.01 | 1.40E-09  |
| TNFRSF10C | rs149110519 | 6  | 144064640 | T | C | 0.04 | 0.13  | 0.02 | 8.76E-08  |
| TNFRSF10C | rs1010366   | 7  | 7190195   | C | T | 0.32 | 0.06  | 0.01 | 2.15E-11  |
| TNFRSF10C | rs58609917  | 7  | 35626657  | A | C | 0.38 | 0.04  | 0.01 | 7.23E-06  |
| TNFRSF10C | rs445       | 7  | 92779056  | T | C | 0.10 | -0.09 | 0.01 | 1.71E-08  |
| TNFRSF10C | -           | 8  | 23114758  | G | T | 0.01 | -1.76 | 0.03 | 2.74E-256 |
| TNFRSF10C | rs7846314   | 8  | 60738272  | T | A | 0.19 | 0.06  | 0.01 | 1.89E-07  |
| TNFRSF10C | rs3124753   | 9  | 133384145 | A | G | 0.47 | -0.07 | 0.01 | 3.70E-14  |
| TNFRSF10C | rs2241244   | 17 | 39997301  | C | G | 0.54 | -0.09 | 0.01 | 4.73E-25  |
| TNFRSF10C | rs4760      | 19 | 43648948  | G | A | 0.16 | -1.17 | 0.01 | 0.00E+00  |
| TNFRSF11A | rs550677346 | 1  | 26552488  | T | A | 0.20 | 0.06  | 0.01 | 3.64E-06  |
| TNFRSF11A | rs9269215   | 6  | 32482496  | G | T | 0.27 | 0.05  | 0.01 | 1.80E-05  |
| TNFRSF11A | rs342293    | 7  | 106731773 | G | C | 0.46 | 0.06  | 0.01 | 2.59E-08  |
| TNFRSF11A | rs141129381 | 9  | 97929618  | G | T | 0.36 | 0.05  | 0.01 | 5.91E-06  |
| TNFRSF11A | -           | 9  | 133276163 | T | A | 0.19 | -0.10 | 0.01 | 2.75E-15  |
| TNFRSF11A | rs7080386   | 10 | 63288546  | A | C | 0.41 | 0.05  | 0.01 | 2.37E-07  |
| TNFRSF11A | rs12946745  | 17 | 76487027  | C | G | 0.67 | -0.05 | 0.01 | 7.86E-06  |
| TNFRSF11A | rs113339733 | 18 | 62351096  | A | G | 0.19 | -0.59 | 0.01 | 0.00E+00  |
| TNFRSF11A | rs516316    | 19 | 48702888  | C | G | 0.51 | -0.12 | 0.01 | 2.79E-32  |
| TNFRSF11B | rs114165349 | 1  | 26695422  | C | G | 0.02 | -0.23 | 0.02 | 2.42E-11  |
| TNFRSF11B | rs79287178  | 3  | 172576710 | A | G | 0.03 | 0.20  | 0.02 | 1.22E-10  |
| TNFRSF11B | rs748443516 | 8  | 119088959 | C | T | 0.50 | 0.20  | 0.01 | 5.60E-84  |
| TNFRSF11B | rs1013495   | 10 | 79380497  | T | C | 0.45 | 0.05  | 0.01 | 2.69E-07  |
| TNFRSF11B | rs7927191   | 11 | 16231436  | C | T | 0.27 | -0.06 | 0.01 | 3.79E-07  |
| TNFRSF11B | rs3825568   | 14 | 68793871  | T | C | 0.46 | -0.05 | 0.01 | 5.41E-06  |
| TNFRSF11B | rs200489612 | 17 | 7203059   | A | G | 0.01 | 0.36  | 0.05 | 4.45E-06  |
| TNFRSF11B | rs704       | 17 | 28367840  | A | G | 0.47 | -0.20 | 0.01 | 1.50E-84  |
| TNFRSF11B | rs77542162  | 17 | 69085137  | G | A | 0.02 | 0.15  | 0.02 | 1.58E-05  |
| TNFRSF11B | rs3747207   | 22 | 43928975  | A | G | 0.22 | 0.08  | 0.01 | 1.54E-09  |
| TNFRSF12A | rs139130389 | 11 | 72139110  | A | C | 0.07 | -0.28 | 0.01 | 5.18E-43  |
| TNFRSF12A | rs964184    | 11 | 116778201 | C | G | 0.87 | -0.08 | 0.01 | 1.74E-06  |
| TNFRSF12A | -           | 16 | 2982315   | T | A | 0.29 | 0.07  | 0.01 | 9.06E-09  |
| TNFRSF12A | rs77542162  | 17 | 69085137  | G | A | 0.02 | 0.22  | 0.02 | 6.50E-10  |
| TNFRSF13B | rs41268860  | 6  | 31254884  | C | A | 0.13 | 0.08  | 0.01 | 5.62E-06  |
| TNFRSF13B | rs10806425  | 6  | 90216893  | A | C | 0.41 | -0.05 | 0.01 | 3.27E-06  |
| TNFRSF13B | rs3804329   | 6  | 106238552 | G | A | 0.20 | 0.09  | 0.01 | 9.88E-10  |
| TNFRSF13B | rs113745074 | 7  | 151245263 | C | T | 0.12 | 0.09  | 0.01 | 8.96E-07  |
| TNFRSF13B | rs1483572   | 8  | 78723008  | C | A | 0.69 | -0.05 | 0.01 | 2.23E-05  |
| TNFRSF13B | rs75587749  | 12 | 7462344   | T | C | 0.09 | 0.09  | 0.01 | 4.18E-06  |
| TNFRSF13B | rs111338191 | 12 | 111388673 | T | A | 0.52 | -0.07 | 0.01 | 2.35E-10  |
| TNFRSF13B | rs374039502 | 13 | 108308037 | A | T | 0.02 | 0.70  | 0.03 | 4.08E-62  |

|           |             |    |           |   |   |      |       |      |           |
|-----------|-------------|----|-----------|---|---|------|-------|------|-----------|
| TNFRSF13B | rs12588969  | 14 | 102764421 | C | G | 0.68 | -0.06 | 0.01 | 2.49E-06  |
| TNFRSF13B | rs34562254  | 17 | 16939677  | A | G | 0.10 | -0.17 | 0.01 | 6.66E-20  |
| TNFRSF13B | -           | 17 | 46220093  | A | G | 0.18 | -0.07 | 0.01 | 1.43E-05  |
| TNFRSF13B | rs12986064  | 19 | 54251270  | C | T | 0.51 | -0.06 | 0.01 | 1.24E-06  |
| TNFRSF13B | rs6053024   | 20 | 4995159   | T | G | 0.39 | 0.05  | 0.01 | 2.69E-06  |
| TNFRSF13B | rs73165110  | 22 | 41895852  | A | G | 0.08 | -0.19 | 0.01 | 1.95E-19  |
| TNFRSF13C | rs17056298  | 5  | 158841671 | G | C | 0.08 | -0.13 | 0.01 | 1.56E-10  |
| TNFRSF13C | rs9264918   | 6  | 31305041  | G | T | 0.20 | -0.07 | 0.01 | 1.27E-07  |
| TNFRSF13C | rs2395904   | 8  | 129605573 | G | T | 0.27 | -0.05 | 0.01 | 2.70E-05  |
| TNFRSF13C | rs7087507   | 10 | 61985930  | G | A | 0.35 | 0.06  | 0.01 | 5.38E-07  |
| TNFRSF13C | rs12784975  | 10 | 96620380  | C | T | 0.19 | -0.08 | 0.01 | 5.95E-08  |
| TNFRSF13C | rs774868556 | 12 | 89431449  | A | A | 0.31 | -0.12 | 0.01 | 3.13E-20  |
| TNFRSF13C | rs374039502 | 13 | 108308037 | A | T | 0.02 | 0.21  | 0.03 | 4.97E-07  |
| TNFRSF13C | rs13330176  | 16 | 85985481  | A | T | 0.24 | 0.06  | 0.01 | 1.44E-05  |
| TNFRSF13C | rs34557412  | 17 | 16948873  | G | A | 0.01 | 0.69  | 0.04 | 1.21E-25  |
| TNFRSF13C | rs35222145  | 17 | 39851068  | G | T | 0.49 | -0.07 | 0.01 | 2.87E-10  |
| TNFRSF13C | rs17676949  | 18 | 63118405  | A | G | 0.10 | -0.08 | 0.01 | 1.15E-05  |
| TNFRSF13C | rs1967330   | 19 | 17548874  | T | C | 0.57 | 0.05  | 0.01 | 6.42E-06  |
| TNFRSF13C | rs625372    | 20 | 3704082   | C | T | 0.63 | 0.05  | 0.01 | 2.13E-05  |
| TNFRSF13C | rs763882049 | 22 | 41931492  | A | T | 0.09 | -0.79 | 0.01 | 0.00E+00  |
| TNFRSF14  | rs2495366   | 1  | 2557491   | A | G | 0.49 | 0.11  | 0.01 | 1.18E-24  |
| TNFRSF14  | rs61747728  | 1  | 179557079 | T | C | 0.04 | 0.14  | 0.02 | 5.11E-06  |
| TNFRSF14  | rs11926707  | 3  | 46884049  | C | T | 0.62 | -0.05 | 0.01 | 1.85E-05  |
| TNFRSF14  | rs342293    | 7  | 106731773 | G | C | 0.46 | -0.05 | 0.01 | 1.62E-05  |
| TNFRSF14  | rs6993770   | 8  | 105569300 | T | A | 0.29 | -0.06 | 0.01 | 2.05E-06  |
| TNFRSF14  | rs111338191 | 12 | 111388673 | T | A | 0.52 | -0.06 | 0.01 | 7.70E-07  |
| TNFRSF19  | rs6605317   | 3  | 198029337 | A | T | 0.23 | 0.06  | 0.01 | 7.77E-07  |
| TNFRSF19  | rs13146355  | 4  | 76490987  | A | G | 0.46 | 0.05  | 0.01 | 4.16E-06  |
| TNFRSF19  | rs61947047  | 13 | 23579770  | T | C | 0.31 | 0.25  | 0.01 | 5.17E-106 |
| TNFRSF19  | rs12434499  | 14 | 105886314 | T | C | 0.16 | 0.09  | 0.01 | 1.43E-08  |
| TNFRSF19  | rs35830321  | 16 | 20341705  | A | C | 0.17 | -0.08 | 0.01 | 3.17E-08  |
| TNFRSF19  | rs2252576   | 21 | 41243366  | T | C | 0.24 | 0.14  | 0.01 | 3.06E-31  |
| TNFRSF1A  | rs61747728  | 1  | 179557079 | T | C | 0.04 | 0.17  | 0.02 | 2.10E-09  |
| TNFRSF1A  | rs13019008  | 2  | 9553607   | A | G | 0.51 | 0.07  | 0.01 | 1.29E-10  |
| TNFRSF1A  | rs553340154 | 6  | 32558001  | G | T | 0.33 | 0.07  | 0.01 | 9.94E-07  |
| TNFRSF1A  | rs10982156  | 9  | 114325784 | A | T | 0.07 | 0.18  | 0.01 | 6.68E-15  |
| TNFRSF1A  | rs9411365   | 9  | 133242881 | G | C | 0.07 | 0.12  | 0.01 | 1.01E-07  |
| TNFRSF1A  | rs4149584   | 12 | 6333477   | T | C | 0.02 | -0.31 | 0.03 | 7.67E-13  |
| TNFRSF1A  | -           | 16 | 20343260  | T | A | 0.18 | -0.08 | 0.01 | 1.30E-07  |
| TNFRSF1A  | rs186021206 | 17 | 7166093   | A | G | 0.01 | 0.33  | 0.05 | 2.33E-05  |
| TNFRSF1A  | rs516316    | 19 | 48702888  | C | G | 0.51 | -0.06 | 0.01 | 9.52E-07  |
| TNFRSF1B  | rs5746026   | 1  | 12193005  | A | G | 0.04 | -0.39 | 0.02 | 1.36E-43  |
| TNFRSF1B  | rs550677346 | 1  | 26552488  | T | A | 0.20 | 0.06  | 0.01 | 9.12E-06  |
| TNFRSF1B  | rs61747728  | 1  | 179557079 | T | C | 0.04 | 0.19  | 0.02 | 7.40E-11  |
| TNFRSF1B  | rs3093974   | 6  | 31538433  | A | G | 0.36 | 0.09  | 0.01 | 9.34E-14  |
| TNFRSF1B  | rs3184504   | 12 | 111446804 | C | T | 0.52 | -0.08 | 0.01 | 3.92E-12  |
| TNFRSF1B  | rs77924615  | 16 | 20381010  | A | G | 0.20 | -0.07 | 0.01 | 4.46E-06  |
| TNFRSF1B  | rs3814995   | 19 | 35851310  | T | C | 0.32 | 0.06  | 0.01 | 1.56E-06  |
| TNFRSF21  | rs583104    | 1  | 109278685 | T | G | 0.77 | 0.07  | 0.01 | 1.13E-07  |
| TNFRSF21  | rs150816167 | 1  | 179602727 | C | T | 0.04 | 0.19  | 0.02 | 2.30E-11  |
| TNFRSF21  | rs1260326   | 2  | 27508073  | C | T | 0.61 | 0.06  | 0.01 | 1.73E-06  |
| TNFRSF21  | rs75166367  | 2  | 162107791 | A | G | 0.06 | -0.11 | 0.02 | 7.58E-06  |
| TNFRSF21  | rs13107325  | 4  | 102267552 | T | C | 0.08 | 0.12  | 0.01 | 5.41E-08  |
| TNFRSF21  | rs17613643  | 6  | 32663641  | G | A | 0.22 | 0.08  | 0.01 | 1.76E-07  |
| TNFRSF21  | rs148598211 | 6  | 47286508  | T | C | 0.00 | -1.86 | 0.06 | 4.12E-106 |
| TNFRSF21  | rs2298475   | 11 | 126408308 | C | T | 0.08 | -0.18 | 0.01 | 4.10E-18  |

|          |             |    |           |   |   |      |       |      |           |
|----------|-------------|----|-----------|---|---|------|-------|------|-----------|
| TNFRSF21 | rs77924615  | 16 | 20381010  | A | G | 0.20 | -0.07 | 0.01 | 1.92E-07  |
| TNFRSF21 | rs186021206 | 17 | 7166093   | A | G | 0.01 | 1.14  | 0.05 | 4.74E-52  |
| TNFRSF21 | rs10445407  | 17 | 81288009  | A | C | 0.48 | -0.05 | 0.01 | 7.38E-06  |
| TNFRSF21 | rs2008174   | 22 | 39464125  | T | C | 0.74 | -0.06 | 0.01 | 2.10E-05  |
| TNFRSF4  | -           | 1  | 1216707   | C | T | 0.04 | -0.31 | 0.02 | 3.82E-28  |
| TNFRSF4  | rs13081778  | 3  | 46912231  | G | A | 0.37 | -0.05 | 0.01 | 2.26E-05  |
| TNFRSF4  | rs2524137   | 6  | 31296805  | T | C | 0.69 | -0.13 | 0.01 | 9.23E-26  |
| TNFRSF4  | rs4946811   | 6  | 107099312 | C | A | 0.36 | 0.06  | 0.01 | 1.41E-06  |
| TNFRSF4  | rs7137828   | 12 | 111494996 | T | C | 0.52 | -0.12 | 0.01 | 8.80E-30  |
| TNFRSF4  | -           | 12 | 118073854 | A | G | 0.03 | -0.15 | 0.02 | 3.38E-06  |
| TNFRSF4  | rs72778736  | 16 | 57267123  | T | C | 0.26 | 0.06  | 0.01 | 1.01E-05  |
| TNFRSF4  | rs186021206 | 17 | 7166093   | A | G | 0.01 | 0.34  | 0.05 | 1.53E-05  |
| TNFRSF6B | rs139025277 | 6  | 32679082  | G | A | 0.02 | 0.20  | 0.03 | 2.14E-06  |
| TNFRSF6B | -           | 9  | 133263362 | G | A | 0.18 | -0.07 | 0.01 | 9.44E-07  |
| TNFRSF6B | rs7137828   | 12 | 111494996 | T | C | 0.52 | -0.07 | 0.01 | 2.32E-10  |
| TNFRSF6B | rs77542162  | 17 | 69085137  | G | A | 0.02 | 0.20  | 0.02 | 2.84E-08  |
| TNFRSF6B | rs6062497   | 20 | 63704906  | T | C | 0.67 | -0.31 | 0.01 | 1.26E-153 |
| TNFRSF8  | rs35249183  | 1  | 12039288  | G | A | 0.10 | 0.35  | 0.01 | 1.08E-74  |
| TNFRSF8  | rs3094005   | 6  | 31497270  | T | G | 0.14 | 0.14  | 0.01 | 4.11E-17  |
| TNFRSF8  | rs10817685  | 9  | 114927025 | T | C | 0.43 | -0.11 | 0.01 | 1.94E-23  |
| TNFRSF8  | rs3184504   | 12 | 111446804 | C | T | 0.52 | -0.08 | 0.01 | 6.34E-13  |
| TNFRSF8  | rs76428106  | 13 | 28029870  | C | T | 0.01 | 0.22  | 0.03 | 2.37E-05  |
| TNFRSF8  | rs2695167   | 15 | 41736622  | G | A | 0.02 | 0.37  | 0.03 | 1.04E-17  |
| TNFRSF8  | rs186021206 | 17 | 7166093   | A | G | 0.01 | 0.38  | 0.05 | 9.74E-07  |
| TNFRSF8  | rs3814995   | 19 | 35851310  | T | C | 0.31 | 0.05  | 0.01 | 1.57E-05  |
| TNFRSF9  | rs2493214   | 1  | 7934360   | G | A | 0.19 | -0.19 | 0.01 | 6.25E-44  |
| TNFRSF9  | rs3117574   | 6  | 31757453  | A | G | 0.13 | 0.13  | 0.01 | 1.37E-14  |
| TNFRSF9  | rs111338191 | 12 | 111388673 | T | A | 0.52 | -0.08 | 0.01 | 1.15E-12  |
| TNFRSF9  | rs374039502 | 13 | 108308037 | A | T | 0.02 | 0.20  | 0.03 | 1.88E-06  |
| TNFRSF9  | rs34557412  | 17 | 16948873  | G | A | 0.01 | 0.51  | 0.04 | 2.96E-14  |
| TNFRSF9  | rs61750000  | 19 | 6534717   | C | G | 0.00 | -0.39 | 0.05 | 1.62E-06  |
| TNFRSF9  | rs73165110  | 22 | 41895852  | A | G | 0.08 | -0.09 | 0.01 | 1.29E-05  |
| TNFSF10  | rs7519758   | 1  | 196856157 | T | C | 0.19 | 0.13  | 0.01 | 1.72E-22  |
| TNFSF10  | rs79287178  | 3  | 172576710 | A | G | 0.03 | -0.54 | 0.02 | 6.05E-61  |
| TNFSF10  | rs756671612 | 3  | 186735641 | G | T | 0.11 | -0.14 | 0.01 | 1.52E-16  |
| TNFSF10  | rs10502     | 6  | 89329951  | C | G | 0.38 | 0.05  | 0.01 | 5.15E-06  |
| TNFSF10  | -           | 8  | 23114758  | G | T | 0.01 | -0.35 | 0.04 | 7.00E-09  |
| TNFSF10  | rs174551    | 11 | 61806212  | C | T | 0.34 | 0.06  | 0.01 | 1.14E-08  |
| TNFSF10  | rs1027315   | 12 | 57640409  | C | T | 0.43 | -0.06 | 0.01 | 6.41E-08  |
| TNFSF10  | rs3751198   | 12 | 103753429 | G | A | 0.60 | 0.05  | 0.01 | 2.50E-05  |
| TNFSF10  | rs28929474  | 14 | 94378610  | T | C | 0.02 | 0.85  | 0.02 | 9.61E-114 |
| TNFSF10  | rs4788460   | 16 | 72120610  | T | C | 0.29 | 0.09  | 0.01 | 5.30E-15  |
| TNFSF10  | rs241771    | 17 | 28265920  | C | T | 0.55 | 0.05  | 0.01 | 5.99E-06  |
| TNFSF10  | rs8178824   | 17 | 66228657  | T | C | 0.03 | 0.51  | 0.02 | 4.93E-60  |
| TNFSF10  | rs680321    | 18 | 32217995  | C | T | 0.46 | -0.11 | 0.01 | 2.94E-24  |
| TNFSF10  | rs4760      | 19 | 43648948  | G | A | 0.16 | -0.48 | 0.01 | 7.60E-227 |
| TNFSF11  | rs552693039 | 1  | 109274241 | C | T | 0.18 | 0.06  | 0.01 | 2.19E-05  |
| TNFSF11  | rs79287178  | 3  | 172576710 | A | G | 0.03 | -0.66 | 0.02 | 3.19E-84  |
| TNFSF11  | rs6988146   | 8  | 23228573  | A | T | 0.75 | 0.18  | 0.01 | 1.35E-42  |
| TNFSF11  | rs2737212   | 8  | 115608987 | T | C | 0.55 | -0.05 | 0.01 | 3.61E-06  |
| TNFSF11  | rs1156545   | 8  | 119068453 | A | G | 0.46 | -0.22 | 0.01 | 6.68E-85  |
| TNFSF11  | rs7137828   | 12 | 111494996 | T | C | 0.52 | -0.06 | 0.01 | 2.51E-07  |
| TNFSF11  | rs2062305   | 13 | 42478744  | A | G | 0.53 | -0.11 | 0.01 | 2.12E-23  |
| TNFSF11  | rs7146217   | 14 | 68784198  | C | T | 0.53 | 0.05  | 0.01 | 6.83E-06  |
| TNFSF11  | rs2207132   | 20 | 40513876  | A | G | 0.03 | -0.15 | 0.02 | 1.25E-06  |
| TNFSF12  | rs2228099   | 1  | 150836413 | G | C | 0.37 | -0.06 | 0.01 | 1.07E-07  |

|          |             |    |           |   |   |      |       |      |           |
|----------|-------------|----|-----------|---|---|------|-------|------|-----------|
| TNFSF12  | rs1354034   | 3  | 56815721  | C | T | 0.60 | -0.05 | 0.01 | 6.54E-06  |
| TNFSF12  | rs828596    | 3  | 98746469  | G | C | 0.41 | -0.07 | 0.01 | 2.08E-09  |
| TNFSF12  | rs9842051   | 3  | 143303014 | C | G | 0.73 | 0.07  | 0.01 | 1.86E-08  |
| TNFSF12  | rs13135092  | 4  | 102276925 | G | A | 0.08 | 0.14  | 0.01 | 7.14E-12  |
| TNFSF12  | rs4098923   | 6  | 31225979  | G | A | 0.45 | -0.05 | 0.01 | 3.44E-06  |
| TNFSF12  | rs139141690 | 7  | 101856650 | A | G | 0.00 | 0.36  | 0.05 | 1.66E-05  |
| TNFSF12  | rs6993770   | 8  | 105569300 | T | A | 0.29 | -0.07 | 0.01 | 8.21E-09  |
| TNFSF12  | rs11784985  | 8  | 143960331 | T | A | 0.41 | 0.07  | 0.01 | 6.51E-11  |
| TNFSF12  | rs60988380  | 9  | 33117956  | T | C | 0.10 | -0.10 | 0.01 | 4.88E-08  |
| TNFSF12  | -           | 9  | 133263362 | G | A | 0.18 | -0.13 | 0.01 | 1.99E-19  |
| TNFSF12  | rs10761741  | 10 | 63306426  | T | G | 0.41 | 0.10  | 0.01 | 5.67E-18  |
| TNFSF12  | rs745680717 | 12 | 480706    | C | G | 0.40 | -0.07 | 0.01 | 6.05E-09  |
| TNFSF12  | rs11158588  | 14 | 65333158  | A | G | 0.79 | -0.07 | 0.01 | 1.91E-07  |
| TNFSF12  | rs11075045  | 16 | 8940859   | G | A | 0.18 | 0.06  | 0.01 | 2.41E-05  |
| TNFSF12  | rs151233    | 16 | 28495107  | T | C | 0.13 | 0.07  | 0.01 | 1.18E-05  |
| TNFSF12  | rs80067372  | 17 | 7549435   | A | G | 0.29 | 0.37  | 0.01 | 1.72E-198 |
| TNFSF12  | rs77542162  | 17 | 69085137  | G | A | 0.02 | 0.17  | 0.02 | 6.22E-06  |
| TNFSF12  | rs892090    | 19 | 55027704  | G | T | 0.83 | 0.10  | 0.01 | 1.72E-12  |
| TNFSF13  | rs12740374  | 1  | 109274968 | T | G | 0.22 | -0.24 | 0.01 | 6.36E-78  |
| TNFSF13  | rs1354034   | 3  | 56815721  | C | T | 0.60 | -0.05 | 0.01 | 6.66E-06  |
| TNFSF13  | -           | 6  | 31391651  | A | G | 0.07 | -0.11 | 0.01 | 2.62E-07  |
| TNFSF13  | rs11570136  | 16 | 11964975  | A | T | 0.33 | 0.06  | 0.01 | 3.89E-08  |
| TNFSF13  | rs3803800   | 17 | 7559652   | G | A | 0.79 | -0.32 | 0.01 | 1.90E-132 |
| TNFSF13  | rs16961828  | 17 | 16916910  | C | G | 0.10 | -0.10 | 0.01 | 1.62E-07  |
| TNFSF13  | rs77542162  | 17 | 69085137  | G | A | 0.02 | 0.17  | 0.02 | 4.51E-06  |
| TNFSF13  | rs892090    | 19 | 55027704  | G | T | 0.83 | 0.08  | 0.01 | 4.01E-08  |
| TNFSF13B | rs35675148  | 3  | 31614721  | T | C | 0.77 | -0.08 | 0.01 | 6.41E-09  |
| TNFSF13B | rs3129755   | 6  | 32615280  | G | A | 0.57 | 0.10  | 0.01 | 2.31E-19  |
| TNFSF13B | rs6488394   | 12 | 7512550   | C | T | 0.91 | -0.15 | 0.01 | 2.35E-15  |
| TNFSF13B | -           | 13 | 108308032 | T | G | 0.02 | 0.76  | 0.03 | 3.34E-77  |
| TNFSF13B | rs79874727  | 14 | 105904579 | A | G | 0.11 | 0.09  | 0.01 | 5.53E-06  |
| TNFSF13B | rs34557412  | 17 | 16948873  | G | A | 0.01 | 0.61  | 0.04 | 4.96E-21  |
| TNFSF13B | rs12986064  | 19 | 54251270  | C | T | 0.51 | -0.12 | 0.01 | 3.69E-28  |
| TNFSF13B | rs763882049 | 22 | 41931492  | A | T | 0.09 | 0.39  | 0.01 | 2.77E-97  |
| TNFSF13B | rs74510325  | 22 | 49921734  | G | C | 0.03 | 0.20  | 0.02 | 8.74E-12  |
| TNFSF14  | rs11242109  | 5  | 132341354 | T | G | 0.48 | -0.06 | 0.01 | 7.05E-08  |
| TNFSF14  | rs6993770   | 8  | 105569300 | T | A | 0.29 | -0.05 | 0.01 | 1.78E-05  |
| TNFSF14  | rs12411442  | 10 | 102589774 | G | A | 0.43 | -0.05 | 0.01 | 7.12E-06  |
| TNFSF14  | rs344560    | 19 | 6665009   | C | T | 0.95 | 0.55  | 0.02 | 2.81E-108 |
| TNFSF14  | rs892090    | 19 | 55027704  | G | T | 0.83 | 0.11  | 0.01 | 3.95E-12  |
| TNR      | rs2235256   | 1  | 175599911 | G | A | 0.44 | -0.37 | 0.01 | 3.16E-254 |
| TNR      | rs2169305   | 3  | 159791591 | C | T | 0.36 | 0.08  | 0.01 | 3.82E-12  |
| TNR      | rs2507997   | 6  | 31347004  | G | A | 0.31 | -0.07 | 0.01 | 6.52E-09  |
| TNR      | rs1111796   | 9  | 114323946 | G | A | 0.60 | 0.14  | 0.01 | 5.71E-37  |
| TNR      | rs11594905  | 10 | 75899975  | A | G | 0.14 | 0.08  | 0.01 | 3.06E-07  |
| TNR      | rs1727      | 10 | 89307012  | A | C | 0.72 | -0.06 | 0.01 | 4.60E-06  |
| TNR      | rs7120175   | 11 | 30468906  | C | G | 0.45 | -0.05 | 0.01 | 6.97E-07  |
| TNR      | rs11603123  | 11 | 126435600 | A | G | 0.03 | 0.34  | 0.02 | 5.42E-31  |
| TNR      | rs4981022   | 12 | 103756096 | A | G | 0.68 | 0.08  | 0.01 | 1.08E-11  |
| TNR      | rs3184504   | 12 | 111446804 | C | T | 0.52 | 0.06  | 0.01 | 2.42E-09  |
| TNR      | rs4767280   | 12 | 114926148 | T | C | 0.40 | -0.11 | 0.01 | 1.77E-25  |
| TNR      | rs12879626  | 14 | 34251928  | G | T | 0.61 | 0.13  | 0.01 | 1.48E-33  |
| TNR      | rs10658607  | 15 | 57564948  | T | A | 0.32 | -0.06 | 0.01 | 7.97E-07  |
| TNR      | rs2439430   | 15 | 66625506  | T | G | 0.50 | 0.07  | 0.01 | 6.45E-10  |
| TNR      | rs4886410   | 15 | 74773303  | C | G | 0.68 | 0.06  | 0.01 | 5.15E-07  |
| TNR      | rs3817428   | 15 | 88872016  | G | C | 0.27 | 0.15  | 0.01 | 3.50E-37  |

|          |             |    |           |   |   |      |       |      |           |
|----------|-------------|----|-----------|---|---|------|-------|------|-----------|
| TNR      | rs186021206 | 17 | 7166093   | A | G | 0.01 | 0.60  | 0.05 | 2.25E-16  |
| TNXB     | rs147650812 | 5  | 136063181 | C | T | 0.01 | -0.28 | 0.04 | 6.14E-06  |
| TNXB     | rs9267797   | 6  | 32062923  | T | C | 0.01 | 1.66  | 0.03 | 3.03E-276 |
| TNXB     | rs181242111 | 10 | 17823665  | A | G | 0.12 | 0.09  | 0.01 | 3.11E-07  |
| TNXB     | rs78689694  | 11 | 126364925 | C | G | 0.13 | -0.15 | 0.01 | 1.93E-23  |
| TNXB     | rs186021206 | 17 | 7166093   | A | G | 0.01 | 0.81  | 0.05 | 2.58E-30  |
| TNXB     | rs1236213   | 21 | 27105423  | T | G | 0.59 | -0.05 | 0.01 | 1.35E-06  |
| TP53     | rs1641549   | 17 | 7671457   | T | C | 0.26 | 0.07  | 0.01 | 1.18E-06  |
| TP53INP1 | rs58534292  | 14 | 21737747  | C | T | 0.65 | -0.05 | 0.01 | 2.12E-05  |
| TP53INP1 | rs56366203  | 14 | 106008121 | G | C | 0.50 | -0.06 | 0.01 | 1.07E-06  |
| TP53INP1 | rs8192297   | 15 | 89801121  | C | T | 0.11 | -0.15 | 0.01 | 8.19E-17  |
| TPMT     | rs115306927 | 6  | 18126707  | T | A | 0.05 | -1.09 | 0.02 | 0.00E+00  |
| TPMT     | rs6580981   | 12 | 54329244  | A | G | 0.46 | 0.05  | 0.01 | 1.29E-05  |
| TPP1     | rs6848819   | 4  | 153530526 | C | A | 0.03 | 0.15  | 0.02 | 1.88E-06  |
| TPP1     | rs10455861  | 6  | 159980630 | A | G | 0.14 | -0.10 | 0.01 | 3.60E-09  |
| TPP1     | rs17154155  | 7  | 80604927  | T | G | 0.41 | 0.06  | 0.01 | 9.94E-07  |
| TPP1     | rs6993770   | 8  | 105569300 | T | A | 0.29 | -0.11 | 0.01 | 8.11E-20  |
| TPP1     | rs9414801   | 10 | 63389329  | A | G | 0.53 | -0.08 | 0.01 | 7.55E-12  |
| TPP1     | rs140726254 | 11 | 6617713   | A | G | 0.00 | 2.90  | 0.08 | 1.68E-130 |
| TPP1     | rs149871778 | 12 | 8946399   | C | G | 0.10 | 0.18  | 0.01 | 2.80E-23  |
| TPP1     | rs10778152  | 12 | 101831973 | G | A | 0.29 | -0.13 | 0.01 | 7.36E-25  |
| TPP1     | rs3184504   | 12 | 111446804 | C | T | 0.52 | -0.06 | 0.01 | 3.19E-08  |
| TPP1     | rs145078947 | 14 | 93186629  | T | G | 0.00 | 0.87  | 0.07 | 7.46E-16  |
| TPP1     | rs1045693   | 16 | 5025225   | A | G | 0.53 | -0.08 | 0.01 | 2.26E-12  |
| TPP1     | rs8064959   | 17 | 5374434   | T | A | 0.31 | -0.05 | 0.01 | 1.83E-05  |
| TPP1     | -           | 17 | 35559053  | T | A | 0.17 | 0.06  | 0.01 | 2.14E-05  |
| TPP1     | rs200210321 | 19 | 19283081  | G | A | 0.07 | 0.12  | 0.01 | 5.69E-08  |
| TPP1     | rs1654425   | 19 | 55027612  | C | T | 0.83 | 0.09  | 0.01 | 6.64E-10  |
| TPPP3    | rs13334364  | 16 | 67298462  | C | T | 0.08 | -0.12 | 0.01 | 2.13E-07  |
| TPSAB1   | rs115427247 | 1  | 92412850  | T | C | 0.03 | -0.15 | 0.01 | 1.75E-11  |
| TPSAB1   | rs16856110  | 1  | 205662639 | G | A | 0.23 | -0.06 | 0.01 | 1.15E-09  |
| TPSAB1   | rs6672987   | 1  | 234559442 | T | C | 0.49 | -0.04 | 0.01 | 1.43E-06  |
| TPSAB1   | rs56043070  | 1  | 247556467 | A | G | 0.07 | 0.09  | 0.01 | 2.50E-10  |
| TPSAB1   | rs62252239  | 3  | 69844820  | T | G | 0.21 | 0.05  | 0.01 | 2.90E-06  |
| TPSAB1   | -           | 3  | 114862405 | G | T | 0.54 | -0.05 | 0.01 | 1.31E-09  |
| TPSAB1   | rs28455789  | 4  | 159042382 | A | G | 0.17 | -0.05 | 0.01 | 3.38E-06  |
| TPSAB1   | rs876606    | 5  | 78505260  | A | G | 0.26 | 0.05  | 0.01 | 4.85E-07  |
| TPSAB1   | rs73112996  | 7  | 50320300  | T | C | 0.14 | 0.05  | 0.01 | 1.61E-05  |
| TPSAB1   | rs56278466  | 10 | 17833858  | G | T | 0.66 | 0.04  | 0.01 | 1.42E-06  |
| TPSAB1   | rs7127546   | 11 | 61922259  | A | G | 0.37 | 0.05  | 0.01 | 6.72E-11  |
| TPSAB1   | rs8051930   | 16 | 1245817   | A | T | 0.48 | 0.83  | 0.01 | 0.00E+00  |
| TPSAB1   | rs17758695  | 18 | 63253621  | T | C | 0.03 | -0.12 | 0.01 | 1.34E-07  |
| TPSAB1   | rs78744187  | 19 | 33263642  | T | C | 0.08 | 0.19  | 0.01 | 2.53E-41  |
| TPSAB1   | rs111402121 | 19 | 43777672  | T | C | 0.38 | 0.07  | 0.01 | 1.75E-18  |
| TPSAB1   | -           | 19 | 51797309  | C | T | 0.22 | 0.06  | 0.01 | 1.29E-11  |
| TRAF2    | rs1354034   | 3  | 56815721  | C | T | 0.60 | 0.07  | 0.01 | 3.00E-09  |
| TRAF2    | rs419788    | 6  | 31961022  | C | T | 0.67 | 0.05  | 0.01 | 1.32E-05  |
| TRAF2    | -           | 9  | 136927852 | T | C | 0.60 | -0.05 | 0.01 | 3.53E-06  |
| TRAF2    | rs4239702   | 20 | 46120612  | C | T | 0.72 | -0.06 | 0.01 | 2.00E-06  |
| TREM2    | rs10919543  | 1  | 161538827 | G | A | 0.32 | 0.05  | 0.01 | 5.21E-06  |
| TREM2    | rs1410996   | 1  | 196727803 | A | G | 0.40 | -0.05 | 0.01 | 2.73E-07  |
| TREM2    | rs531950386 | 6  | 32518763  | T | G | 0.48 | -0.07 | 0.01 | 9.77E-09  |
| TREM2    | rs143332484 | 6  | 41161469  | T | C | 0.01 | -1.47 | 0.03 | 1.71E-186 |
| TREM2    | rs913914    | 9  | 99495968  | G | C | 0.37 | -0.05 | 0.01 | 1.39E-06  |
| TREM2    | rs7232      | 11 | 60173126  | A | T | 0.37 | 0.40  | 0.01 | 5.24E-283 |
| TREM2    | rs11057840  | 12 | 124831509 | C | A | 0.14 | 0.10  | 0.01 | 1.83E-11  |



|         |             |    |           |   |   |      |       |      |           |
|---------|-------------|----|-----------|---|---|------|-------|------|-----------|
| TREM2   | rs738409    | 22 | 43928847  | G | C | 0.22 | 0.06  | 0.01 | 4.34E-07  |
| TREML2  | rs150816167 | 1  | 179602727 | C | T | 0.04 | 0.14  | 0.02 | 1.69E-06  |
| TREML2  | rs11759347  | 6  | 41199359  | A | C | 0.24 | 0.30  | 0.01 | 5.25E-118 |
| TREML2  | rs56293029  | 6  | 135097901 | A | C | 0.26 | 0.08  | 0.01 | 2.83E-10  |
| TREML2  | rs409801    | 9  | 4744743   | C | T | 0.51 | 0.06  | 0.01 | 2.71E-07  |
| TREML2  | rs7080386   | 10 | 63288546  | A | C | 0.41 | 0.06  | 0.01 | 3.57E-08  |
| TREML2  | rs12576289  | 11 | 126395946 | G | A | 0.22 | -0.07 | 0.01 | 1.80E-06  |
| TREML2  | rs111338191 | 12 | 111388673 | T | A | 0.52 | -0.12 | 0.01 | 2.09E-27  |
| TREML2  | rs186021206 | 17 | 7166093   | A | G | 0.01 | 0.46  | 0.05 | 1.74E-09  |
| TREML2  | rs2659005   | 17 | 81244914  | T | C | 0.44 | 0.05  | 0.01 | 1.20E-05  |
| TRIAP1  | rs148212596 | 1  | 193105381 | G | A | 0.02 | -0.43 | 0.03 | 3.52E-28  |
| TRIAP1  | rs9856296   | 3  | 14113953  | C | T | 0.30 | -0.08 | 0.01 | 3.35E-10  |
| TRIAP1  | rs1354034   | 3  | 56815721  | C | T | 0.60 | 0.09  | 0.01 | 3.07E-14  |
| TRIAP1  | rs62508038  | 8  | 42398746  | G | C | 0.00 | -1.04 | 0.10 | 2.00E-12  |
| TRIAP1  | rs7896518   | 10 | 63344740  | G | A | 0.42 | 0.06  | 0.01 | 3.04E-06  |
| TRIAP1  | -           | 11 | 263868    | C | A | 0.24 | 0.06  | 0.01 | 2.77E-05  |
| TRIAP1  | rs60822569  | 12 | 54323724  | C | T | 0.55 | 0.08  | 0.01 | 5.04E-12  |
| TRIAP1  | rs10418046  | 19 | 53824615  | G | T | 0.21 | 0.09  | 0.01 | 2.33E-11  |
| TRIM21  | rs915652    | 6  | 31781365  | A | G | 0.13 | -0.09 | 0.01 | 9.27E-08  |
| TRIM21  | rs4746204   | 10 | 63568758  | T | C | 0.48 | -0.05 | 0.01 | 1.39E-05  |
| TRIM21  | rs199881122 | 11 | 4385377   | T | A | 0.00 | -1.12 | 0.08 | 5.71E-22  |
| TRIM5   | rs11821656  | 11 | 5667914   | C | G | 0.14 | -0.41 | 0.01 | 4.83E-145 |
| TSHB    | rs6426808   | 1  | 19508921  | A | G | 0.51 | 0.09  | 0.01 | 1.22E-14  |
| TSHB    | rs334713    | 1  | 61156615  | C | A | 0.96 | 0.13  | 0.02 | 4.04E-06  |
| TSHB    | rs12068854  | 1  | 107867043 | C | A | 0.09 | 0.09  | 0.01 | 6.36E-06  |
| TSHB    | rs2712172   | 2  | 216756010 | A | G | 0.26 | -0.08 | 0.01 | 5.09E-09  |
| TSHB    | rs10028213  | 4  | 148731458 | G | C | 0.20 | -0.11 | 0.01 | 1.18E-14  |
| TSHB    | rs2046045   | 5  | 77239986  | G | T | 0.40 | 0.15  | 0.01 | 1.34E-37  |
| TSHB    | rs556025    | 6  | 32603103  | T | C | 0.35 | 0.06  | 0.01 | 3.55E-06  |
| TSHB    | rs9472136   | 6  | 43842284  | T | C | 0.40 | -0.07 | 0.01 | 2.38E-10  |
| TSHB    | rs2983511   | 6  | 165630471 | C | G | 0.31 | -0.12 | 0.01 | 1.74E-22  |
| TSHB    | -           | 8  | 32509087  | A | T | 0.18 | -0.07 | 0.01 | 3.37E-06  |
| TSHB    | rs7032019   | 9  | 97785862  | A | G | 0.67 | 0.05  | 0.01 | 1.75E-05  |
| TSHB    | rs7128207   | 11 | 45208510  | T | G | 0.56 | 0.07  | 0.01 | 1.58E-10  |
| TSHB    | rs61938844  | 12 | 96190080  | A | G | 0.03 | 0.16  | 0.02 | 1.11E-05  |
| TSHB    | rs116909374 | 14 | 36269155  | T | C | 0.04 | -0.18 | 0.02 | 9.21E-10  |
| TSHB    | rs724170    | 14 | 80991596  | A | G | 0.49 | -0.05 | 0.01 | 1.97E-05  |
| TSHB    | rs7142772   | 14 | 104734040 | G | T | 0.44 | -0.05 | 0.01 | 1.74E-05  |
| TSHB    | rs200066768 | 15 | 49436680  | T | A | 0.18 | -0.08 | 0.01 | 1.99E-07  |
| TSHB    | rs200293726 | 16 | 79720543  | T | A | 0.31 | -0.08 | 0.01 | 5.41E-11  |
| TSHB    | -           | 19 | 7213358   | A | C | 0.20 | 0.07  | 0.01 | 1.60E-05  |
| TSHB    | rs1203944   | 20 | 22616241  | C | T | 0.79 | 0.06  | 0.01 | 1.70E-05  |
| TSPAN1  | rs34463133  | 1  | 46185497  | A | G | 0.00 | -0.46 | 0.06 | 9.11E-07  |
| TSPAN1  | rs2268535   | 3  | 187039295 | A | G | 0.24 | 0.06  | 0.01 | 1.17E-06  |
| TSPAN1  | rs708686    | 19 | 5840608   | T | C | 0.27 | 0.06  | 0.01 | 6.49E-07  |
| TST     | rs4821544   | 22 | 36862461  | C | T | 0.30 | -0.11 | 0.01 | 5.83E-17  |
| TXLNA   | rs1354034   | 3  | 56815721  | C | T | 0.60 | 0.10  | 0.01 | 9.84E-20  |
| TXLNA   | rs342293    | 7  | 106731773 | G | C | 0.46 | -0.06 | 0.01 | 3.07E-07  |
| TXLNA   | rs6993770   | 8  | 105569300 | T | A | 0.29 | -0.05 | 0.01 | 1.98E-05  |
| TXLNA   | rs11502185  | 11 | 180258    | C | T | 0.26 | 0.07  | 0.01 | 5.61E-06  |
| TXNDC15 | rs188468174 | 1  | 24965206  | T | C | 0.01 | -0.51 | 0.03 | 2.81E-36  |
| TXNDC15 | rs115276619 | 1  | 184895998 | A | T | 0.02 | 0.21  | 0.03 | 1.08E-07  |
| TXNDC15 | rs6054      | 4  | 154568456 | T | C | 0.01 | 0.31  | 0.04 | 2.93E-06  |
| TXNDC15 | rs6876611   | 5  | 96907894  | T | A | 0.48 | -0.05 | 0.01 | 4.16E-06  |
| TXNDC15 | rs3733897   | 5  | 134887903 | G | A | 0.13 | 1.17  | 0.01 | 0.00E+00  |
| TXNDC15 | rs2524096   | 6  | 31268690  | T | G | 0.42 | -0.17 | 0.01 | 4.59E-69  |

|         |             |    |           |   |   |      |       |      |           |
|---------|-------------|----|-----------|---|---|------|-------|------|-----------|
| TXNDC15 | rs73015965  | 6  | 160706469 | G | A | 0.01 | 0.34  | 0.04 | 3.23E-07  |
| TXNDC15 | -           | 11 | 61824523  | G | A | 0.31 | 0.06  | 0.01 | 3.59E-08  |
| TXNDC15 | rs139130389 | 11 | 72139110  | A | C | 0.07 | -0.19 | 0.01 | 6.61E-25  |
| TXNDC15 | rs28929474  | 14 | 94378610  | T | C | 0.02 | 0.23  | 0.02 | 1.31E-11  |
| TXNDC15 | rs12929396  | 16 | 11680769  | T | C | 0.49 | -0.04 | 0.01 | 6.91E-06  |
| TXNDC15 | rs9302635   | 16 | 72110275  | C | T | 0.18 | -0.09 | 0.01 | 4.24E-13  |
| TXNDC15 | rs1801689   | 17 | 66214462  | C | A | 0.03 | 0.50  | 0.02 | 2.76E-73  |
| TXNDC5  | rs1354034   | 3  | 56815721  | C | T | 0.60 | 0.07  | 0.01 | 8.65E-10  |
| TXNDC5  | rs11962800  | 6  | 7886672   | G | A | 0.11 | -0.16 | 0.01 | 9.07E-18  |
| TXNDC5  | rs6993770   | 8  | 105569300 | T | A | 0.29 | -0.07 | 0.01 | 2.27E-07  |
| TXNDC5  | rs6580981   | 12 | 54329244  | A | G | 0.46 | 0.06  | 0.01 | 5.23E-07  |
| TXNRD1  | rs1354034   | 3  | 56815721  | C | T | 0.60 | 0.06  | 0.01 | 1.78E-06  |
| TXNRD1  | rs6993770   | 8  | 105569300 | T | A | 0.29 | -0.07 | 0.01 | 1.13E-07  |
| TXNRD1  | rs10743940  | 12 | 7498542   | T | A | 0.97 | -0.17 | 0.02 | 1.78E-06  |
| TXNRD1  | rs60822569  | 12 | 54323724  | C | T | 0.55 | 0.05  | 0.01 | 6.85E-06  |
| TXNRD1  | rs201402862 | 12 | 104313269 | A | G | 0.00 | -1.14 | 0.14 | 2.67E-07  |
| TXNRD1  | rs12975366  | 19 | 54255498  | C | T | 0.40 | -0.06 | 0.01 | 3.14E-07  |
| TYMP    | rs10774624  | 12 | 111395984 | A | G | 0.51 | -0.05 | 0.01 | 5.29E-06  |
| TYMP    | rs131805    | 22 | 50525724  | C | T | 0.78 | 0.22  | 0.01 | 4.83E-59  |
| TYRO3   | rs3791101   | 1  | 43900578  | A | G | 0.31 | 0.05  | 0.01 | 2.48E-05  |
| TYRO3   | rs10935473  | 3  | 98698056  | T | G | 0.44 | -0.23 | 0.01 | 7.68E-119 |
| TYRO3   | rs13107325  | 4  | 102267552 | T | C | 0.08 | 0.08  | 0.01 | 1.61E-05  |
| TYRO3   | -           | 9  | 133263362 | G | A | 0.18 | -0.22 | 0.01 | 3.57E-69  |
| TYRO3   | rs174530    | 11 | 61779120  | G | A | 0.37 | 0.05  | 0.01 | 1.47E-06  |
| TYRO3   | rs3967200   | 11 | 126362490 | T | C | 0.13 | -0.07 | 0.01 | 5.88E-07  |
| TYRO3   | rs8024626   | 15 | 41570983  | A | G | 0.30 | -0.64 | 0.01 | 0.00E+00  |
| TYRO3   | rs186021206 | 17 | 7166093   | A | G | 0.01 | 0.97  | 0.04 | 1.02E-47  |
| TYRO3   | rs2008174   | 22 | 39464125  | T | C | 0.74 | -0.09 | 0.01 | 5.17E-15  |
| UBAC1   | -           | 3  | 49275118  | A | T | 0.14 | 0.11  | 0.01 | 1.27E-10  |
| UBAC1   | rs112505519 | 9  | 135938274 | C | G | 0.00 | -1.01 | 0.10 | 1.39E-11  |
| ULBP2   | rs4703854   | 5  | 72397636  | T | C | 0.76 | 0.07  | 0.01 | 2.55E-08  |
| ULBP2   | rs6924387   | 6  | 136761810 | G | A | 0.41 | -0.05 | 0.01 | 4.27E-06  |
| ULBP2   | rs60340208  | 6  | 149980059 | G | A | 0.15 | -0.68 | 0.01 | 0.00E+00  |
| ULBP2   | rs1115867   | 8  | 10781240  | A | T | 0.59 | -0.07 | 0.01 | 1.20E-10  |
| ULBP2   | rs10104997  | 8  | 54527508  | T | C | 0.21 | 0.11  | 0.01 | 1.62E-19  |
| ULBP2   | rs677355    | 9  | 133270615 | A | G | 0.32 | 0.14  | 0.01 | 2.33E-36  |
| ULBP2   | rs371539188 | 16 | 68534225  | T | C | 0.76 | 0.06  | 0.01 | 5.47E-06  |
| ULBP2   | rs4804181   | 19 | 12398722  | A | C | 0.78 | -0.11 | 0.01 | 1.28E-19  |
| UMOD    | rs4846828   | 1  | 217256289 | A | G | 0.62 | -0.04 | 0.01 | 6.90E-06  |
| UMOD    | rs12465018  | 2  | 9096314   | A | G | 0.17 | -0.06 | 0.01 | 1.69E-06  |
| UMOD    | rs72819488  | 2  | 95281351  | A | G | 0.16 | -0.06 | 0.01 | 5.54E-07  |
| UMOD    | rs72831838  | 2  | 113258824 | T | C | 0.16 | 0.05  | 0.01 | 6.35E-06  |
| UMOD    | rs6793835   | 3  | 136101092 | A | G | 0.27 | 0.05  | 0.01 | 6.36E-06  |
| UMOD    | -           | 3  | 186932142 | C | G | 0.62 | 0.04  | 0.01 | 5.00E-06  |
| UMOD    | rs56012466  | 7  | 151709702 | A | G | 0.27 | 0.07  | 0.01 | 1.53E-11  |
| UMOD    | rs13288823  | 9  | 6386584   | T | C | 0.05 | -0.09 | 0.01 | 1.82E-06  |
| UMOD    | rs774882452 | 11 | 61827448  | C | T | 0.34 | -0.04 | 0.01 | 4.44E-06  |
| UMOD    | rs5792371   | 11 | 65789645  | G | T | 0.35 | -0.08 | 0.01 | 1.23E-18  |
| UMOD    | rs12368376  | 12 | 515011    | G | C | 0.17 | -0.06 | 0.01 | 3.81E-08  |
| UMOD    | rs11172134  | 12 | 57252006  | A | T | 0.21 | 0.05  | 0.01 | 1.48E-06  |
| UMOD    | rs10851885  | 15 | 76012162  | G | A | 0.26 | -0.05 | 0.01 | 1.63E-06  |
| UMOD    | rs12922822  | 16 | 20356323  | T | C | 0.18 | -0.96 | 0.01 | 0.00E+00  |
| UMOD    | rs186021206 | 17 | 7166093   | A | G | 0.01 | 0.29  | 0.04 | 2.18E-06  |
| UMOD    | rs2934951   | 17 | 39677075  | G | A | 0.68 | -0.04 | 0.01 | 7.76E-06  |
| UMOD    | rs72835417  | 17 | 49164280  | A | G | 0.11 | 0.24  | 0.01 | 1.97E-67  |
| UMOD    | rs1997596   | 21 | 15206128  | T | C | 0.34 | 0.04  | 0.01 | 4.68E-06  |

|       |             |    |           |   |   |      |       |      |          |
|-------|-------------|----|-----------|---|---|------|-------|------|----------|
| USO1  | rs1354034   | 3  | 56815721  | C | T | 0.60 | 0.06  | 0.01 | 6.66E-08 |
| USO1  | rs342298    | 7  | 106733200 | T | C | 0.45 | -0.06 | 0.01 | 2.31E-06 |
| USO1  | rs6993770   | 8  | 105569300 | T | A | 0.29 | -0.07 | 0.01 | 2.02E-07 |
| USP8  | rs78909033  | 2  | 240571486 | A | G | 0.14 | -0.19 | 0.01 | 2.56E-29 |
| USP8  | rs1354034   | 3  | 56815721  | C | T | 0.60 | 0.07  | 0.01 | 3.91E-09 |
| USP8  | rs342298    | 7  | 106733200 | T | C | 0.46 | -0.06 | 0.01 | 1.11E-06 |
| USP8  | rs60822569  | 12 | 54323724  | C | T | 0.55 | 0.05  | 0.01 | 2.53E-05 |
| USP8  | rs4380013   | 15 | 50467231  | A | G | 0.20 | 0.09  | 0.01 | 1.03E-09 |
| UXS1  | rs660240    | 1  | 109275216 | C | T | 0.79 | 0.06  | 0.01 | 8.77E-06 |
| UXS1  | rs138588539 | 2  | 106188136 | T | C | 0.08 | 0.18  | 0.01 | 1.97E-17 |
| UXS1  | rs68066031  | 2  | 224015781 | C | T | 0.23 | -0.15 | 0.01 | 3.72E-28 |
| UXS1  | rs710446    | 3  | 186742138 | C | T | 0.41 | -0.06 | 0.01 | 1.98E-06 |
| UXS1  | rs4253282   | 4  | 186243245 | T | C | 0.51 | -0.12 | 0.01 | 1.56E-27 |
| UXS1  | rs2731673   | 5  | 177412897 | C | T | 0.74 | -0.06 | 0.01 | 2.08E-06 |
| UXS1  | rs75694075  | 11 | 76783716  | C | T | 0.18 | -0.24 | 0.01 | 1.26E-57 |
| VAMP5 | rs6547623   | 2  | 85574841  | A | T | 0.30 | 0.08  | 0.01 | 2.51E-10 |
| VAMP5 | rs505922    | 9  | 133273813 | C | T | 0.32 | 0.06  | 0.01 | 6.05E-07 |
| VASH1 | rs1354034   | 3  | 56815721  | C | T | 0.60 | 0.10  | 0.01 | 5.54E-18 |
| VASH1 | rs114694170 | 5  | 88884379  | C | T | 0.06 | 0.13  | 0.02 | 1.29E-07 |
| VASH1 | rs17622656  | 5  | 132485305 | A | G | 0.39 | -0.05 | 0.01 | 2.37E-05 |
| VASH1 | rs11502185  | 11 | 180258    | C | T | 0.26 | 0.07  | 0.01 | 3.99E-06 |
| VASH1 | rs60822569  | 12 | 54323724  | C | T | 0.55 | 0.05  | 0.01 | 1.29E-05 |
| VASH1 | rs11159226  | 14 | 76715089  | G | T | 0.06 | 0.21  | 0.02 | 1.32E-17 |
| VASN  | rs150816167 | 1  | 179602727 | C | T | 0.04 | 0.14  | 0.02 | 4.91E-07 |
| VASN  | rs1260326   | 2  | 27508073  | C | T | 0.61 | 0.06  | 0.01 | 1.01E-08 |
| VASN  | rs199922514 | 8  | 9325592   | G | A | 0.91 | -0.10 | 0.01 | 3.25E-07 |
| VASN  | rs7896518   | 10 | 63344740  | G | A | 0.42 | 0.05  | 0.01 | 5.12E-06 |
| VASN  | rs35713275  | 16 | 4381359   | A | G | 0.06 | -0.90 | 0.02 | 0.00E+00 |
| VASN  | rs77542162  | 17 | 69085137  | G | A | 0.02 | 0.19  | 0.02 | 2.45E-07 |
| VAT1  | rs1047891   | 2  | 210675783 | A | C | 0.31 | -0.07 | 0.01 | 5.55E-08 |
| VAT1  | rs11781667  | 8  | 143966688 | T | G | 0.36 | 0.06  | 0.01 | 3.41E-06 |
| VAT1  | rs12342201  | 9  | 93132682  | A | G | 0.48 | -0.07 | 0.01 | 4.95E-10 |
| VAT1  | rs4149307   | 9  | 104827463 | T | C | 0.15 | 0.09  | 0.01 | 1.52E-08 |
| VAT1  | rs174564    | 11 | 61820833  | G | A | 0.35 | 0.05  | 0.01 | 2.22E-05 |
| VAT1  | rs190543502 | 15 | 43464986  | C | T | 0.02 | -0.22 | 0.02 | 8.67E-09 |
| VAT1  | rs173539    | 16 | 56954132  | T | C | 0.33 | 0.06  | 0.01 | 2.79E-06 |
| VAT1  | rs200561116 | 16 | 67938291  | T | A | 0.12 | 0.10  | 0.01 | 5.44E-08 |
| VAT1  | rs7210098   | 17 | 43141596  | T | C | 0.34 | -0.14 | 0.01 | 3.03E-32 |
| VAT1  | rs2868346   | 20 | 45919331  | T | C | 0.76 | -0.15 | 0.01 | 2.23E-31 |
| VCAM1 | rs139561173 | 1  | 100679634 | C | A | 0.21 | -0.10 | 0.01 | 3.85E-13 |
| VCAM1 | rs61801010  | 1  | 161572445 | G | A | 0.11 | 0.12  | 0.01 | 3.41E-10 |
| VCAM1 | rs2009581   | 2  | 111050100 | A | G | 0.27 | -0.06 | 0.01 | 2.91E-06 |
| VCAM1 | rs1257169   | 2  | 134206291 | A | C | 0.50 | -0.11 | 0.01 | 9.97E-23 |
| VCAM1 | rs35723031  | 2  | 181459315 | T | G | 0.56 | -0.06 | 0.01 | 4.73E-07 |
| VCAM1 | rs28418426  | 6  | 32651877  | C | T | 0.53 | 0.06  | 0.01 | 5.99E-07 |
| VCAM1 | rs8176693   | 9  | 133262254 | T | C | 0.06 | 0.15  | 0.02 | 2.14E-10 |
| VCAM1 | rs2723889   | 12 | 103606692 | C | T | 0.67 | 0.07  | 0.01 | 1.28E-09 |
| VCAM1 | rs3184504   | 12 | 111446804 | C | T | 0.52 | -0.14 | 0.01 | 1.76E-37 |
| VCAM1 | rs186021206 | 17 | 7166093   | A | G | 0.01 | 0.86  | 0.05 | 3.11E-29 |
| VCAM1 | rs34557412  | 17 | 16948873  | G | A | 0.01 | 0.32  | 0.04 | 2.89E-06 |
| VCAM1 | rs3747207   | 22 | 43928975  | A | G | 0.22 | 0.06  | 0.01 | 2.24E-05 |
| VCAN  | rs3754053   | 1  | 161606054 | G | C | 0.58 | 0.05  | 0.01 | 3.62E-07 |
| VCAN  | rs34552760  | 2  | 55962368  | G | A | 0.62 | -0.09 | 0.01 | 2.92E-19 |
| VCAN  | rs1229984   | 4  | 99318162  | C | T | 0.98 | -0.27 | 0.02 | 1.58E-15 |
| VCAN  | rs13107325  | 4  | 102267552 | T | C | 0.08 | 0.15  | 0.01 | 2.52E-15 |
| VCAN  | rs309559    | 5  | 83537550  | G | A | 0.48 | -0.65 | 0.01 | 0.00E+00 |

|       |             |    |           |   |   |      |       |      |          |
|-------|-------------|----|-----------|---|---|------|-------|------|----------|
| VCAN  | rs1917368   | 7  | 17872129  | T | G | 0.39 | -0.05 | 0.01 | 5.52E-07 |
| VCAN  | rs3736590   | 7  | 100153658 | T | G | 0.56 | 0.06  | 0.01 | 6.23E-09 |
| VCAN  | rs10503665  | 8  | 19762823  | A | G | 0.09 | -0.21 | 0.01 | 2.05E-35 |
| VCAN  | rs11783413  | 8  | 133537462 | G | C | 0.57 | 0.05  | 0.01 | 3.05E-06 |
| VCAN  | rs2435381   | 10 | 43183348  | T | C | 0.27 | 0.09  | 0.01 | 1.52E-14 |
| VCAN  | rs3138189   | 12 | 91171917  | C | T | 0.06 | -0.10 | 0.01 | 1.33E-06 |
| VCAN  | rs11419060  | 15 | 101242185 | G | T | 0.19 | -0.07 | 0.01 | 1.30E-08 |
| VCAN  | rs200489612 | 17 | 7203059   | A | G | 0.01 | 0.39  | 0.05 | 1.08E-07 |
| VCAN  | rs2665397   | 17 | 59749370  | A | C | 0.54 | 0.06  | 0.01 | 1.64E-08 |
| VCAN  | rs55639531  | 18 | 394341    | G | C | 0.29 | 0.06  | 0.01 | 8.29E-08 |
| VEGFA | rs2274319   | 1  | 156481081 | C | T | 0.65 | -0.06 | 0.01 | 7.73E-08 |
| VEGFA | rs114694170 | 5  | 88884379  | C | T | 0.06 | 0.16  | 0.01 | 2.56E-15 |
| VEGFA | rs6921438   | 6  | 43957870  | A | G | 0.49 | -0.68 | 0.01 | 0.00E+00 |
| VEGFA | rs13236689  | 7  | 80606698  | G | T | 0.41 | 0.05  | 0.01 | 5.11E-07 |
| VEGFA | rs6993770   | 8  | 105569300 | T | A | 0.29 | -0.22 | 0.01 | 1.43E-96 |
| VEGFA | rs2375981   | 9  | 2692583   | G | C | 0.44 | -0.19 | 0.01 | 1.20E-82 |
| VEGFA | rs7075195   | 10 | 63290899  | G | A | 0.41 | 0.12  | 0.01 | 1.44E-36 |
| VEGFA | rs3184504   | 12 | 111446804 | C | T | 0.52 | -0.04 | 0.01 | 5.61E-06 |
| VEGFA | rs9630357   | 14 | 33929731  | T | C | 0.18 | 0.06  | 0.01 | 2.53E-05 |
| VEGFA | rs12445050  | 16 | 81837364  | T | C | 0.14 | 0.07  | 0.01 | 3.73E-07 |
| VEGFA | rs34416903  | 16 | 88492837  | C | T | 0.28 | 0.08  | 0.01 | 8.01E-14 |
| VEGFA | rs892090    | 19 | 55027704  | G | T | 0.83 | 0.11  | 0.01 | 6.88E-16 |
| VEGFA | rs3827978   | 20 | 19300647  | T | C | 0.35 | 0.06  | 0.01 | 7.10E-08 |
| VEGFC | rs7618405   | 3  | 18209017  | A | C | 0.20 | -0.07 | 0.01 | 5.64E-06 |
| VEGFC | rs1354034   | 3  | 56815721  | C | T | 0.60 | -0.07 | 0.01 | 5.34E-10 |
| VEGFC | rs10016018  | 4  | 101873464 | T | A | 0.40 | -0.07 | 0.01 | 2.89E-08 |
| VEGFC | rs35029317  | 4  | 176832273 | G | A | 0.01 | -0.81 | 0.05 | 1.66E-27 |
| VEGFC | rs11242109  | 5  | 132341354 | T | G | 0.48 | -0.05 | 0.01 | 1.06E-05 |
| VEGFC | rs2516471   | 6  | 31432515  | A | G | 0.06 | -0.12 | 0.02 | 4.73E-07 |
| VEGFC | rs1917342   | 6  | 70640051  | G | A | 0.30 | -0.05 | 0.01 | 1.51E-05 |
| VEGFC | rs6961069   | 7  | 80589645  | T | C | 0.40 | 0.07  | 0.01 | 3.21E-08 |
| VEGFC | rs6993770   | 8  | 105569300 | T | A | 0.29 | -0.09 | 0.01 | 1.16E-12 |
| VEGFC | rs13298270  | 9  | 114011185 | T | C | 0.34 | -0.05 | 0.01 | 2.37E-05 |
| VEGFC | -           | 10 | 63433569  | C | T | 0.49 | -0.08 | 0.01 | 3.40E-11 |
| VEGFC | rs71474568  | 10 | 102589091 | G | T | 0.34 | 0.08  | 0.01 | 3.68E-11 |
| VEGFC | rs73000929  | 11 | 114082900 | A | G | 0.04 | -0.14 | 0.02 | 2.97E-06 |
| VEGFC | rs1362213   | 12 | 6173262   | T | C | 0.48 | -0.05 | 0.01 | 1.27E-05 |
| VEGFC | rs61978213  | 14 | 70187041  | A | G | 0.04 | 0.12  | 0.02 | 1.95E-05 |
| VEGFC | rs59001897  | 15 | 64868193  | A | T | 0.17 | 0.07  | 0.01 | 2.06E-06 |
| VEGFC | rs12445050  | 16 | 81837364  | T | C | 0.14 | 0.11  | 0.01 | 1.46E-10 |
| VEGFC | rs1654425   | 19 | 55027612  | C | T | 0.83 | 0.17  | 0.01 | 6.98E-29 |
| VEGFC | rs6081555   | 20 | 19265079  | T | G | 0.34 | 0.07  | 0.01 | 1.86E-08 |
| VEGFD | rs710446    | 3  | 186742138 | C | T | 0.41 | 0.06  | 0.01 | 4.10E-07 |
| VEGFD | rs12331618  | 4  | 186218785 | G | A | 0.51 | 0.14  | 0.01 | 6.50E-35 |
| VEGFD | rs3217225   | 5  | 109855234 | T | C | 0.17 | -0.08 | 0.01 | 7.13E-08 |
| VEGFD | rs2731674   | 5  | 177412889 | G | T | 0.74 | 0.08  | 0.01 | 1.79E-09 |
| VEGFD | rs10982164  | 9  | 114328787 | A | G | 0.07 | -0.12 | 0.02 | 7.00E-07 |
| VEGFD | rs56278466  | 10 | 17833858  | G | T | 0.66 | 0.07  | 0.01 | 9.34E-09 |
| VEGFD | rs1037117   | 15 | 101528455 | A | G | 0.25 | -0.08 | 0.01 | 2.57E-10 |
| VMO1  | rs117779442 | 8  | 19982198  | T | C | 0.07 | -0.08 | 0.01 | 8.55E-06 |
| VMO1  | rs112875651 | 8  | 125494452 | A | G | 0.39 | -0.04 | 0.01 | 2.16E-06 |
| VMO1  | rs964184    | 11 | 116778201 | C | G | 0.87 | -0.08 | 0.01 | 4.05E-11 |
| VMO1  | rs3794465   | 14 | 105903347 | G | A | 0.14 | -0.11 | 0.01 | 3.96E-18 |
| VMO1  | rs261290    | 15 | 58386521  | C | T | 0.66 | -0.13 | 0.01 | 3.34E-43 |
| VMO1  | rs8078118   | 17 | 4786743   | A | C | 0.42 | 0.75  | 0.01 | 0.00E+00 |
| VMO1  | rs3826688   | 19 | 44915704  | C | T | 0.64 | 0.05  | 0.01 | 6.68E-08 |

|        |             |    |           |   |   |      |       |      |           |
|--------|-------------|----|-----------|---|---|------|-------|------|-----------|
| VNN2   | rs11125915  | 2  | 62308853  | C | A | 0.64 | 0.05  | 0.01 | 1.03E-05  |
| VNN2   | rs9493425   | 6  | 132753506 | G | A | 0.32 | -0.70 | 0.01 | 0.00E+00  |
| VNN2   | rs56278466  | 10 | 17833858  | G | T | 0.66 | 0.07  | 0.01 | 3.29E-10  |
| VNN2   | rs603424    | 10 | 100315722 | A | G | 0.17 | -0.06 | 0.01 | 4.37E-06  |
| VNN2   | rs2511241   | 11 | 73234296  | T | C | 0.93 | 0.18  | 0.01 | 5.03E-20  |
| VNN2   | rs73017399  | 11 | 126316417 | C | G | 0.24 | 0.07  | 0.01 | 1.93E-10  |
| VNN2   | rs7310615   | 12 | 111427245 | G | C | 0.52 | -0.04 | 0.01 | 2.06E-05  |
| VNN2   | rs146261845 | 17 | 7108935   | T | C | 0.01 | 0.29  | 0.04 | 1.12E-05  |
| VNN2   | rs56922390  | 17 | 40000768  | G | C | 0.39 | 0.10  | 0.01 | 1.85E-25  |
| VNN2   | rs4760      | 19 | 43648948  | G | A | 0.16 | -0.18 | 0.01 | 1.93E-42  |
| VPS37A | rs1354034   | 3  | 56815721  | C | T | 0.60 | 0.05  | 0.01 | 3.24E-06  |
| VPS37A | rs964184    | 11 | 116778201 | C | G | 0.87 | -0.07 | 0.01 | 1.77E-05  |
| VPS53  | rs1354034   | 3  | 56815721  | C | T | 0.60 | 0.06  | 0.01 | 1.26E-06  |
| VPS53  | rs342293    | 7  | 106731773 | G | C | 0.46 | -0.05 | 0.01 | 4.89E-06  |
| VSIG4  | rs514591    | 1  | 196671190 | G | A | 0.23 | -0.06 | 0.01 | 2.68E-06  |
| VSIG4  | rs11130306  | 3  | 52507237  | G | A | 0.48 | 0.05  | 0.01 | 1.75E-05  |
| VSIG4  | rs13146355  | 4  | 76490987  | A | G | 0.46 | 0.05  | 0.01 | 1.69E-05  |
| VSIG4  | rs12667978  | 7  | 129137407 | T | C | 0.57 | 0.05  | 0.01 | 2.58E-05  |
| VSIG4  | rs10769256  | 11 | 47356845  | T | C | 0.40 | -0.10 | 0.01 | 2.40E-20  |
| VSIG4  | rs540639423 | 12 | 111407152 | T | C | 0.01 | 0.28  | 0.04 | 1.17E-05  |
| VSIG4  | rs28640218  | 16 | 20347945  | T | G | 0.19 | -0.06 | 0.01 | 5.95E-06  |
| VSIG4  | -           | 17 | 59924072  | A | C | 0.14 | 0.08  | 0.01 | 3.60E-06  |
| VSIG4  | rs2230199   | 19 | 6718376   | C | G | 0.22 | 0.07  | 0.01 | 5.34E-07  |
| VSIR   | rs2278668   | 3  | 123116385 | C | T | 0.59 | -0.05 | 0.01 | 2.39E-05  |
| VSIR   | rs10016018  | 4  | 101873464 | T | A | 0.40 | -0.06 | 0.01 | 2.12E-06  |
| VSIR   | rs11242109  | 5  | 132341354 | T | G | 0.48 | -0.06 | 0.01 | 1.98E-07  |
| VSIR   | rs6961069   | 7  | 80589645  | T | C | 0.40 | 0.06  | 0.01 | 2.09E-06  |
| VSIR   | rs342298    | 7  | 106733200 | T | C | 0.46 | -0.06 | 0.01 | 7.90E-07  |
| VSIR   | rs6993770   | 8  | 105569300 | T | A | 0.29 | -0.12 | 0.01 | 2.16E-22  |
| VSIR   | rs10999992  | 10 | 71769141  | C | T | 0.15 | 0.43  | 0.01 | 1.48E-162 |
| VSIR   | rs7956289   | 12 | 6184907   | G | A | 0.49 | -0.05 | 0.01 | 1.42E-05  |
| VSIR   | rs1654425   | 19 | 55027612  | C | T | 0.83 | 0.10  | 0.01 | 1.14E-11  |
| VSTM1  | rs60816814  | 6  | 29920825  | A | C | 0.04 | 0.18  | 0.02 | 1.64E-13  |
| VSTM1  | rs188743906 | 17 | 7087693   | T | C | 0.01 | 0.25  | 0.04 | 2.00E-05  |
| VSTM1  | rs2433724   | 19 | 54042277  | C | T | 0.43 | -0.77 | 0.01 | 0.00E+00  |
| VSTM1  | rs189448562 | 20 | 3724468   | C | G | 0.01 | 0.22  | 0.03 | 1.12E-06  |
| VSTM2L | rs646776    | 1  | 109275908 | T | C | 0.78 | 0.21  | 0.01 | 3.49E-50  |
| VSTM2L | rs2273349   | 20 | 37996354  | A | C | 0.18 | -0.15 | 0.01 | 8.81E-22  |
| VTA1   | rs1354034   | 3  | 56815721  | C | T | 0.60 | 0.08  | 0.01 | 1.00E-10  |
| VTA1   | rs10900809  | 5  | 132490630 | A | G | 0.39 | -0.06 | 0.01 | 8.47E-07  |
| VTA1   | rs10733789  | 10 | 63188924  | C | T | 0.31 | 0.06  | 0.01 | 5.29E-06  |
| VTA1   | rs60822569  | 12 | 54323724  | C | T | 0.55 | 0.06  | 0.01 | 2.35E-06  |
| VTCN1  | rs56174814  | 1  | 117180685 | A | T | 0.16 | 0.11  | 0.01 | 1.11E-10  |
| VTCN1  | rs679574    | 19 | 48702851  | G | C | 0.51 | 0.08  | 0.01 | 2.42E-11  |
| VWA1   | rs528749486 | 1  | 1499128   | T | C | 0.01 | -1.50 | 0.03 | 3.16E-202 |
| VWA1   | -           | 3  | 155824602 | A | T | 0.25 | 0.07  | 0.01 | 5.84E-07  |
| VWA1   | rs35457250  | 3  | 186620775 | T | C | 0.01 | 0.52  | 0.04 | 3.20E-18  |
| VWA1   | rs6054      | 4  | 154568456 | T | C | 0.01 | 0.41  | 0.05 | 6.91E-08  |
| VWA1   | rs10843403  | 12 | 29387376  | C | T | 0.61 | 0.05  | 0.01 | 1.32E-05  |
| VWA1   | rs28929474  | 14 | 94378610  | T | C | 0.02 | 0.22  | 0.03 | 1.34E-08  |
| VWA1   | rs1801689   | 17 | 66214462  | C | A | 0.03 | 0.26  | 0.02 | 1.43E-15  |
| VWA1   | rs7256200   | 19 | 44912678  | T | G | 0.13 | -0.08 | 0.01 | 1.00E-06  |
| VWC2   | rs61747728  | 1  | 179557079 | T | C | 0.04 | 0.13  | 0.02 | 1.70E-06  |
| VWC2   | rs141154056 | 3  | 52823924  | T | C | 0.00 | 1.78  | 0.08 | 4.29E-49  |
| VWC2   | rs769604    | 7  | 49775794  | G | C | 0.46 | -0.45 | 0.01 | 0.00E+00  |
| VWF    | rs9390463   | 6  | 147381011 | G | A | 0.50 | 0.06  | 0.01 | 4.18E-08  |

|         |             |    |           |   |   |      |       |      |           |
|---------|-------------|----|-----------|---|---|------|-------|------|-----------|
| VWF     | rs2726953   | 8  | 27943788  | A | G | 0.30 | 0.06  | 0.01 | 9.48E-06  |
| VWF     | rs505922    | 9  | 133273813 | C | T | 0.32 | 0.31  | 0.01 | 4.50E-149 |
| VWF     | rs68120218  | 12 | 6032283   | A | G | 0.35 | 0.10  | 0.01 | 3.38E-16  |
| VWF     | rs3751198   | 12 | 103753429 | G | A | 0.60 | 0.06  | 0.01 | 2.70E-07  |
| VWF     | rs10744481  | 12 | 130792726 | A | G | 0.68 | -0.05 | 0.01 | 1.91E-05  |
| WARS    | rs7974006   | 12 | 7367230   | G | A | 0.10 | 0.08  | 0.01 | 2.57E-05  |
| WARS    | rs7137828   | 12 | 111494996 | T | C | 0.52 | -0.07 | 0.01 | 6.28E-11  |
| WARS    | rs2273804   | 14 | 100376300 | G | C | 0.26 | -0.26 | 0.01 | 5.89E-89  |
| WAS     | rs5030082   | 3  | 186741160 | G | A | 0.40 | 0.06  | 0.01 | 4.13E-07  |
| WAS     | rs4861708   | 4  | 186236079 | A | G | 0.51 | 0.11  | 0.01 | 4.55E-22  |
| WAS     | rs1801020   | 5  | 177409531 | G | A | 0.74 | 0.08  | 0.01 | 1.64E-09  |
| WASF1   | rs1354034   | 3  | 56815721  | C | T | 0.60 | 0.05  | 0.01 | 2.06E-05  |
| WASF1   | rs1980532   | 6  | 110399006 | G | A | 0.45 | -0.29 | 0.01 | 1.04E-138 |
| WASF1   | rs7916868   | 10 | 63229171  | T | A | 0.50 | 0.05  | 0.01 | 7.49E-06  |
| WASF3   | rs1018123   | 13 | 26640777  | C | T | 0.57 | 0.13  | 0.01 | 1.37E-30  |
| WFDC12  | rs61816761  | 1  | 152313385 | A | G | 0.02 | 0.73  | 0.02 | 6.81E-117 |
| WFDC12  | rs12030654  | 1  | 156751240 | A | T | 0.33 | 0.06  | 0.01 | 2.53E-08  |
| WFDC12  | rs17350445  | 3  | 187914551 | T | C | 0.06 | -0.12 | 0.01 | 6.51E-11  |
| WFDC12  | rs7613473   | 3  | 190303767 | A | G | 0.59 | 0.07  | 0.01 | 4.25E-15  |
| WFDC12  | -           | 11 | 34718151  | A | G | 0.54 | 0.07  | 0.01 | 3.18E-13  |
| WFDC12  | rs12816349  | 12 | 6600779   | A | G | 0.24 | -0.06 | 0.01 | 1.40E-09  |
| WFDC12  | rs10483947  | 14 | 80308772  | T | C | 0.09 | 0.08  | 0.01 | 1.35E-06  |
| WFDC12  | rs8038032   | 15 | 35010668  | G | A | 0.32 | -0.09 | 0.01 | 2.15E-18  |
| WFDC12  | rs35673728  | 15 | 40755579  | C | T | 0.06 | -0.17 | 0.01 | 6.59E-21  |
| WFDC12  | rs562177063 | 16 | 31131513  | T | C | 0.00 | -0.62 | 0.06 | 1.07E-12  |
| WFDC12  | rs6508781   | 19 | 38294678  | C | A | 0.17 | -0.13 | 0.01 | 1.05E-28  |
| WFDC12  | rs75002084  | 20 | 45126666  | G | C | 0.43 | -0.43 | 0.01 | 0.00E+00  |
| WFDC12  | rs714781    | 21 | 38806457  | T | C | 0.33 | -0.06 | 0.01 | 3.54E-10  |
| WFDC2   | rs77924615  | 16 | 20381010  | A | G | 0.20 | -0.07 | 0.01 | 2.01E-07  |
| WFDC2   | rs2638282   | 19 | 48710576  | A | G | 0.53 | 0.06  | 0.01 | 3.63E-08  |
| WFDC2   | rs973446    | 20 | 45465735  | G | C | 0.08 | -0.14 | 0.01 | 4.94E-12  |
| WFIKKN1 | rs760192241 | 1  | 24768903  | C | A | 0.55 | -0.06 | 0.01 | 3.96E-08  |
| WFIKKN1 | rs55944332  | 2  | 144969054 | G | A | 0.24 | 0.06  | 0.01 | 8.45E-06  |
| WFIKKN1 | rs11676298  | 2  | 226427015 | G | C | 0.19 | -0.08 | 0.01 | 7.98E-10  |
| WFIKKN1 | rs76311404  | 3  | 123380282 | A | G | 0.22 | 0.07  | 0.01 | 5.21E-08  |
| WFIKKN1 | rs34250475  | 4  | 153508890 | T | C | 0.45 | 0.05  | 0.01 | 5.08E-06  |
| WFIKKN1 | rs27659     | 5  | 97007848  | G | A | 0.55 | -0.05 | 0.01 | 1.45E-05  |
| WFIKKN1 | rs2647074   | 6  | 32606583  | T | C | 0.33 | 0.09  | 0.01 | 1.43E-15  |
| WFIKKN1 | rs3731211   | 9  | 21986848  | A | T | 0.72 | -0.08 | 0.01 | 8.36E-12  |
| WFIKKN1 | rs183805019 | 9  | 99584725  | C | T | 0.00 | -0.46 | 0.06 | 5.32E-07  |
| WFIKKN1 | rs4937333   | 11 | 128460625 | C | T | 0.53 | 0.05  | 0.01 | 1.77E-06  |
| WFIKKN1 | rs7955466   | 12 | 6381950   | T | C | 0.36 | 0.05  | 0.01 | 5.01E-06  |
| WFIKKN1 | rs11513729  | 12 | 111835695 | T | C | 0.41 | 0.07  | 0.01 | 6.53E-11  |
| WFIKKN1 | rs55798945  | 16 | 619708    | G | T | 0.30 | 0.27  | 0.01 | 1.06E-112 |
| WFIKKN1 | rs34557412  | 17 | 16948873  | G | A | 0.01 | 0.39  | 0.04 | 1.77E-09  |
| WFIKKN1 | rs6077396   | 20 | 8623946   | A | G | 0.51 | 0.11  | 0.01 | 1.10E-26  |
| WFIKKN2 | rs6664906   | 1  | 30881966  | C | T | 0.46 | -0.05 | 0.01 | 1.49E-05  |
| WFIKKN2 | rs4546329   | 5  | 61293912  | T | C | 0.50 | -0.05 | 0.01 | 4.86E-07  |
| WFIKKN2 | rs4591185   | 17 | 50832073  | A | T | 0.66 | -0.67 | 0.01 | 0.00E+00  |
| WFIKKN2 | rs33950747  | 19 | 35848345  | T | C | 0.08 | 0.14  | 0.01 | 4.46E-13  |
| WIF1    | rs1414660   | 1  | 240423395 | T | C | 0.19 | 0.09  | 0.01 | 6.85E-10  |
| WIF1    | rs6768977   | 3  | 12466670  | G | A | 0.53 | 0.06  | 0.01 | 6.73E-07  |
| WIF1    | rs17613549  | 6  | 32662910  | C | G | 0.22 | -0.07 | 0.01 | 2.26E-06  |
| WIF1    | rs28457828  | 8  | 54538582  | T | C | 0.21 | -0.10 | 0.01 | 1.13E-13  |
| WIF1    | rs10963680  | 9  | 18629285  | A | G | 0.24 | 0.06  | 0.01 | 1.26E-05  |
| WIF1    | -           | 9  | 133263362 | G | A | 0.18 | -0.14 | 0.01 | 5.77E-22  |

|         |             |    |           |   |   |      |       |      |           |
|---------|-------------|----|-----------|---|---|------|-------|------|-----------|
| WIF1    | -           | 10 | 24911876  | A | C | 0.37 | -0.05 | 0.01 | 9.43E-06  |
| WIF1    | rs7896518   | 10 | 63344740  | G | A | 0.42 | 0.06  | 0.01 | 3.72E-08  |
| WIF1    | rs10741178  | 10 | 129104740 | C | T | 0.78 | 0.06  | 0.01 | 9.48E-06  |
| WIF1    | rs7949566   | 11 | 126415406 | A | G | 0.42 | 0.07  | 0.01 | 1.87E-09  |
| WIF1    | rs6489548   | 12 | 479438    | G | A | 0.60 | -0.19 | 0.01 | 3.92E-63  |
| WIF1    | rs462010    | 12 | 64944365  | A | G | 0.44 | -0.19 | 0.01 | 3.97E-67  |
| WIF1    | rs12894709  | 14 | 74975031  | A | G | 0.47 | -0.05 | 0.01 | 1.25E-06  |
| WIF1    | rs117068593 | 14 | 92651884  | T | C | 0.19 | -0.08 | 0.01 | 3.98E-08  |
| WIF1    | rs186021206 | 17 | 7166093   | A | G | 0.01 | 0.49  | 0.05 | 1.43E-10  |
| WIF1    | rs2145943   | 20 | 39934603  | G | A | 0.41 | 0.10  | 0.01 | 2.66E-19  |
| WNT9A   | rs6690181   | 1  | 227869167 | C | T | 0.38 | -0.13 | 0.01 | 3.86E-31  |
| WNT9A   | rs9274370   | 6  | 32664750  | A | C | 0.14 | -0.08 | 0.01 | 5.66E-07  |
| WWP2    | rs1354034   | 3  | 56815721  | C | T | 0.60 | 0.08  | 0.01 | 5.58E-13  |
| WWP2    | rs342293    | 7  | 106731773 | G | C | 0.46 | -0.06 | 0.01 | 4.02E-07  |
| WWP2    | rs72783174  | 16 | 69775775  | T | C | 0.08 | -0.31 | 0.01 | 8.87E-50  |
| XCL1    | rs4656599   | 1  | 168534148 | T | C | 0.19 | 0.83  | 0.01 | 0.00E+00  |
| XCL1    | rs2009581   | 2  | 111050100 | A | G | 0.27 | -0.15 | 0.01 | 1.29E-42  |
| XCL1    | rs13063578  | 3  | 47046347  | A | T | 0.40 | -0.09 | 0.01 | 2.69E-19  |
| XCL1    | rs2548993   | 5  | 132473177 | A | G | 0.72 | 0.07  | 0.01 | 2.36E-09  |
| XCL1    | rs9265813   | 6  | 31342763  | T | A | 0.17 | 0.08  | 0.01 | 1.82E-08  |
| XCL1    | rs705379    | 7  | 95324583  | A | G | 0.48 | 0.06  | 0.01 | 4.18E-10  |
| XCL1    | rs8177653   | 10 | 5973418   | G | A | 0.33 | 0.05  | 0.01 | 4.33E-07  |
| XCL1    | rs3184504   | 12 | 111446804 | C | T | 0.52 | -0.10 | 0.01 | 2.03E-24  |
| XCL1    | -           | 17 | 39907727  | C | A | 0.51 | -0.06 | 0.01 | 1.07E-09  |
| XCL1    | rs77542162  | 17 | 69085137  | G | A | 0.02 | 0.26  | 0.02 | 5.75E-16  |
| XCL1    | rs547843340 | 19 | 16398994  | T | G | 0.13 | -0.06 | 0.01 | 2.72E-05  |
| XCL1    | rs17561351  | 19 | 44869072  | G | A | 0.06 | -0.09 | 0.01 | 6.40E-06  |
| XCL1    | rs6031304   | 20 | 44028908  | C | T | 0.73 | 0.05  | 0.01 | 1.16E-05  |
| XG      | rs11178645  | 12 | 71129854  | A | T | 0.41 | -0.05 | 0.01 | 1.45E-09  |
| XPNPEP2 | rs114165349 | 1  | 26695422  | C | G | 0.02 | 0.42  | 0.02 | 1.13E-29  |
| XPNPEP2 | rs1260326   | 2  | 27508073  | C | T | 0.61 | -0.07 | 0.01 | 3.42E-09  |
| XPNPEP2 | rs1584300   | 2  | 61358866  | C | A | 0.15 | 0.08  | 0.01 | 2.61E-06  |
| XPNPEP2 | rs687339    | 3  | 136213517 | T | C | 0.77 | 0.06  | 0.01 | 1.65E-05  |
| XPNPEP2 | rs5860563   | 4  | 99126006  | A | C | 0.70 | -0.08 | 0.01 | 4.06E-11  |
| XPNPEP2 | rs4323324   | 6  | 130061751 | A | G | 0.58 | 0.07  | 0.01 | 9.39E-11  |
| XPNPEP2 | rs10822143  | 10 | 63128096  | T | C | 0.50 | -0.06 | 0.01 | 2.97E-07  |
| XPNPEP2 | rs11621792  | 14 | 24402720  | T | C | 0.45 | 0.08  | 0.01 | 2.52E-11  |
| XPNPEP2 | rs2498786   | 14 | 104796031 | G | C | 0.62 | -0.08 | 0.01 | 1.25E-12  |
| XPNPEP2 | rs339969    | 15 | 60591082  | A | C | 0.62 | 0.09  | 0.01 | 2.58E-16  |
| XPNPEP2 | -           | 16 | 79720536  | T | A | 0.31 | -0.16 | 0.01 | 2.06E-40  |
| XPNPEP2 | -           | 17 | 47500653  | C | A | 0.50 | -0.09 | 0.01 | 4.97E-15  |
| XPNPEP2 | rs60018147  | 19 | 3375574   | G | A | 0.12 | -0.09 | 0.01 | 3.36E-06  |
| XPNPEP2 | rs2207132   | 20 | 40513876  | A | G | 0.03 | -0.22 | 0.02 | 1.57E-11  |
| XPNPEP2 | rs1800961   | 20 | 44413724  | T | C | 0.03 | -0.23 | 0.02 | 7.92E-13  |
| XRCC4   | rs1805377   | 5  | 83353124  | A | G | 0.11 | 0.10  | 0.01 | 1.24E-07  |
| YES1    | rs1354034   | 3  | 56815721  | C | T | 0.60 | 0.06  | 0.01 | 2.40E-07  |
| YES1    | rs2741189   | 18 | 707511    | C | G | 0.23 | 0.09  | 0.01 | 1.76E-10  |
| YTHDF3  | rs1354034   | 3  | 56815721  | C | T | 0.60 | 0.09  | 0.01 | 4.69E-13  |
| YTHDF3  | rs11502185  | 11 | 180258    | C | T | 0.26 | 0.07  | 0.01 | 2.27E-06  |
| ZBTB16  | rs1354034   | 3  | 56815721  | C | T | 0.60 | 0.07  | 0.01 | 5.97E-09  |
| ZBTB16  | rs915652    | 6  | 31781365  | A | G | 0.13 | -0.08 | 0.01 | 7.15E-06  |
| ZBTB16  | rs342292    | 7  | 106730198 | G | C | 0.46 | -0.06 | 0.01 | 2.96E-07  |
| ZBTB16  | rs6993770   | 8  | 105569300 | T | A | 0.29 | -0.06 | 0.01 | 2.02E-06  |
| ZBTB16  | rs12767683  | 10 | 102556824 | A | C | 0.32 | 0.08  | 0.01 | 1.91E-11  |
| ZBTB16  | rs73000929  | 11 | 114082900 | A | G | 0.04 | 0.85  | 0.02 | 8.05E-183 |
| ZBTB16  | rs7297265   | 12 | 54325905  | G | A | 0.44 | 0.08  | 0.01 | 2.89E-12  |

|        |           |    |           |   |   |      |       |      |          |
|--------|-----------|----|-----------|---|---|------|-------|------|----------|
| ZBTB17 | rs7080536 | 10 | 113588287 | A | G | 0.04 | -0.16 | 0.02 | 5.75E-08 |
| ZBTB17 | rs7260293 | 19 | 52726141  | T | C | 0.62 | 0.07  | 0.01 | 1.19E-09 |

---



**Supplementary Table 2. Associations of genetically predicted proteins with severe COVID-19 using IVW method and cis+trans SNPs.**

| <b>Protein</b> | <b>No. of SNPs</b> | <b>Beta</b> | <b>SE</b> | <b>Pval</b> |
|----------------|--------------------|-------------|-----------|-------------|
| AARSD1         | 3                  | 0.10        | 0.10      | 3.03E-01    |
| ABHD14B        | 4                  | -0.05       | 0.05      | 3.18E-01    |
| ABL1           | 1                  | 0.16        | 0.17      | 3.51E-01    |
| ACAA1          | 3                  | -0.11       | 0.12      | 3.73E-01    |
| ACAN           | 15                 | -0.02       | 0.05      | 6.58E-01    |
| ACE2           | 9                  | -0.06       | 0.09      | 4.65E-01    |
| ACOX1          | 1                  | -0.25       | 0.20      | 2.09E-01    |
| ACP5           | 9                  | 0.04        | 0.04      | 2.98E-01    |
| ACP6           | 2                  | 0.00        | 0.02      | 8.70E-01    |
| ACTA2          | 1                  | 0.40        | 0.26      | 1.19E-01    |
| ACVRL1         | 3                  | 0.05        | 0.04      | 2.27E-01    |
| ACY1           | 3                  | 0.08        | 0.09      | 3.79E-01    |
| ADA            | 4                  | 0.00        | 0.02      | 9.35E-01    |
| ADA2           | 13                 | -0.10       | 0.05      | 4.38E-02    |
| ADAM15         | 7                  | -0.02       | 0.02      | 1.87E-01    |
| ADAM22         | 6                  | 0.03        | 0.03      | 4.46E-01    |
| ADAM23         | 5                  | 0.02        | 0.03      | 4.50E-01    |
| ADAM8          | 7                  | 0.02        | 0.03      | 4.24E-01    |
| ADAMTS13       | 11                 | 0.03        | 0.04      | 4.61E-01    |
| ADAMTS15       | 5                  | 0.05        | 0.09      | 5.81E-01    |
| ADAMTS16       | 1                  | 0.03        | 0.12      | 8.11E-01    |
| ADAMTS8        | 4                  | 0.00        | 0.03      | 9.07E-01    |
| ADGRB3         | 5                  | 0.02        | 0.02      | 2.97E-01    |
| ADGRE2         | 7                  | -0.01       | 0.05      | 7.84E-01    |
| ADGRE5         | 8                  | -0.03       | 0.05      | 6.16E-01    |
| ADGRG1         | 9                  | -0.27       | 0.07      | 1.36E-04    |
| ADGRG2         | 6                  | 0.57        | 0.11      | 3.73E-07    |
| ADH4           | 6                  | -0.02       | 0.08      | 7.59E-01    |
| AFP            | 21                 | -0.02       | 0.03      | 4.75E-01    |
| AGER           | 15                 | 0.08        | 0.06      | 1.60E-01    |
| AGR2           | 4                  | 0.16        | 0.10      | 1.03E-01    |
| AGR3           | 3                  | 0.16        | 0.15      | 2.91E-01    |
| AGRN           | 6                  | 0.03        | 0.05      | 4.96E-01    |
| AGRP           | 8                  | -0.04       | 0.08      | 6.56E-01    |
| AGXT           | 11                 | -0.04       | 0.04      | 3.52E-01    |
| AHCY           | 1                  | -0.03       | 0.04      | 3.90E-01    |
| AHSP           | 7                  | 0.13        | 0.09      | 1.39E-01    |
| AIF1           | 1                  | 0.29        | 0.13      | 2.10E-02    |
| AIFM1          | 2                  | 0.01        | 0.19      | 9.48E-01    |
| AKR1B1         | 2                  | -0.09       | 0.10      | 3.53E-01    |
| AKR1C4         | 1                  | -0.18       | 0.28      | 5.22E-01    |
| AKT1S1         | 3                  | -0.18       | 0.13      | 1.75E-01    |
| AKT3           | 2                  | -0.42       | 0.22      | 5.13E-02    |
| ALCAM          | 11                 | -0.04       | 0.06      | 5.78E-01    |
| ALDH1A1        | 3                  | -0.05       | 0.16      | 7.40E-01    |
| ALDH3A1        | 1                  | -0.02       | 0.03      | 5.68E-01    |
| ALPP           | 10                 | 0.08        | 0.03      | 1.03E-02    |
| AMBP           | 8                  | -0.03       | 0.07      | 6.89E-01    |
| AMIGO2         | 11                 | -0.09       | 0.04      | 2.43E-02    |
| AMN            | 5                  | 0.02        | 0.02      | 4.13E-01    |

|          |    |       |      |          |
|----------|----|-------|------|----------|
| AMY2A    | 8  | -0.14 | 0.04 | 5.34E-04 |
| AMY2B    | 9  | -0.16 | 0.03 | 1.18E-06 |
| ANG      | 3  | 0.04  | 0.03 | 1.84E-01 |
| ANGPT1   | 17 | 0.05  | 0.04 | 2.59E-01 |
| ANGPT2   | 6  | 0.15  | 0.07 | 2.76E-02 |
| ANGPTL1  | 6  | 0.04  | 0.06 | 4.49E-01 |
| ANGPTL2  | 5  | 0.12  | 0.09 | 2.14E-01 |
| ANGPTL3  | 6  | -0.07 | 0.09 | 4.75E-01 |
| ANGPTL4  | 1  | 0.03  | 0.05 | 5.34E-01 |
| ANGPTL7  | 6  | 0.02  | 0.07 | 7.37E-01 |
| ANKRD54  | 1  | 0.05  | 0.24 | 8.33E-01 |
| ANPEP    | 7  | 0.05  | 0.03 | 1.39E-01 |
| ANXA11   | 3  | -0.37 | 0.18 | 4.34E-02 |
| ANXA3    | 5  | -0.17 | 0.11 | 1.02E-01 |
| ANXA4    | 2  | -0.20 | 0.16 | 2.31E-01 |
| ANXA5    | 1  | 0.23  | 0.13 | 7.71E-02 |
| AOC1     | 1  | 0.01  | 0.06 | 8.49E-01 |
| AOC3     | 10 | 0.03  | 0.03 | 2.46E-01 |
| APBB1IP  | 5  | 0.01  | 0.05 | 8.04E-01 |
| APEX1    | 3  | -0.04 | 0.05 | 4.21E-01 |
| APLP1    | 5  | -0.01 | 0.09 | 8.77E-01 |
| APOH     | 1  | 0.00  | 0.03 | 9.40E-01 |
| APOM     | 9  | 0.12  | 0.04 | 3.64E-03 |
| APP      | 17 | 0.06  | 0.05 | 2.37E-01 |
| APRT     | 6  | -0.01 | 0.09 | 9.31E-01 |
| AREG     | 3  | 0.36  | 0.08 | 5.12E-06 |
| ARG1     | 5  | 0.02  | 0.06 | 7.94E-01 |
| ARHGAP1  | 2  | -0.31 | 0.14 | 2.35E-02 |
| ARHGAP25 | 2  | 0.10  | 0.14 | 4.89E-01 |
| ARSA     | 7  | 0.02  | 0.02 | 4.32E-01 |
| ARSB     | 11 | 0.07  | 0.05 | 1.33E-01 |
| ART3     | 4  | 0.22  | 0.12 | 6.83E-02 |
| ARTN     | 1  | -0.43 | 0.30 | 1.46E-01 |
| ASAH2    | 16 | -0.03 | 0.02 | 2.79E-01 |
| ASGR1    | 6  | 0.01  | 0.06 | 8.33E-01 |
| ATF2     | 2  | -0.08 | 0.13 | 5.10E-01 |
| ATG4A    | 3  | 0.32  | 0.14 | 2.69E-02 |
| ATOX1    | 5  | 0.15  | 0.09 | 1.13E-01 |
| ATP5IF1  | 6  | 0.04  | 0.09 | 6.80E-01 |
| ATP6V1F  | 1  | 0.21  | 0.22 | 3.51E-01 |
| ATXN10   | 5  | -0.14 | 0.09 | 1.15E-01 |
| AXIN1    | 3  | -0.08 | 0.16 | 6.24E-01 |
| AXL      | 8  | -0.07 | 0.06 | 2.02E-01 |
| AZU1     | 2  | -0.10 | 0.20 | 6.16E-01 |
| B4GALT1  | 6  | 0.03  | 0.04 | 4.35E-01 |
| B4GAT1   | 9  | 0.02  | 0.04 | 5.65E-01 |
| BACH1    | 3  | -0.08 | 0.16 | 5.94E-01 |
| BAG3     | 4  | 0.22  | 0.11 | 4.64E-02 |
| BAIAP2   | 5  | -0.04 | 0.10 | 6.63E-01 |
| BAMBI    | 1  | -0.20 | 0.22 | 3.51E-01 |
| BANK1    | 3  | 0.07  | 0.11 | 5.11E-01 |
| BAX      | 2  | -0.22 | 0.18 | 2.00E-01 |

|          |    |       |      |          |
|----------|----|-------|------|----------|
| BCAM     | 14 | -0.01 | 0.03 | 7.35E-01 |
| BCAN     | 7  | 0.11  | 0.05 | 4.24E-02 |
| BCL2L11  | 10 | 0.02  | 0.04 | 5.30E-01 |
| BCR      | 1  | 0.30  | 0.36 | 4.09E-01 |
| BGN      | 11 | 0.02  | 0.06 | 6.95E-01 |
| BID      | 2  | -0.07 | 0.17 | 6.77E-01 |
| BIN2     | 3  | 0.01  | 0.12 | 9.26E-01 |
| BIRC2    | 4  | -0.25 | 0.15 | 9.07E-02 |
| BLMH     | 3  | -0.02 | 0.03 | 4.57E-01 |
| BLVRB    | 2  | 0.04  | 0.11 | 7.06E-01 |
| BMP4     | 5  | -0.08 | 0.11 | 4.90E-01 |
| BMP6     | 15 | -0.02 | 0.04 | 6.21E-01 |
| BOC      | 8  | -0.03 | 0.07 | 6.34E-01 |
| BPIFB1   | 15 | 0.03  | 0.03 | 2.93E-01 |
| BRK1     | 8  | 0.01  | 0.06 | 8.46E-01 |
| BSG      | 10 | -0.16 | 0.06 | 8.55E-03 |
| BST1     | 4  | -0.01 | 0.01 | 5.37E-01 |
| BST2     | 11 | -0.02 | 0.06 | 7.60E-01 |
| BTC      | 3  | -0.01 | 0.03 | 8.06E-01 |
| BTN2A1   | 7  | 0.04  | 0.05 | 4.38E-01 |
| BTN3A2   | 3  | -0.04 | 0.02 | 1.25E-01 |
| C19orf12 | 5  | 0.04  | 0.12 | 7.44E-01 |
| C1QA     | 13 | -0.01 | 0.04 | 7.39E-01 |
| C1QTNF1  | 4  | 0.07  | 0.07 | 2.71E-01 |
| C2       | 2  | 0.09  | 0.15 | 5.39E-01 |
| C2CD2L   | 1  | -0.20 | 0.28 | 4.73E-01 |
| C4BPB    | 10 | 0.01  | 0.05 | 8.33E-01 |
| CA1      | 4  | 0.04  | 0.08 | 6.40E-01 |
| CA11     | 2  | -0.10 | 0.11 | 4.00E-01 |
| CA12     | 7  | 0.03  | 0.05 | 4.91E-01 |
| CA13     | 3  | -0.11 | 0.06 | 4.47E-02 |
| CA14     | 5  | -0.03 | 0.07 | 6.87E-01 |
| CA2      | 2  | -0.03 | 0.13 | 8.16E-01 |
| CA3      | 6  | -0.07 | 0.07 | 2.95E-01 |
| CA4      | 9  | 0.08  | 0.04 | 1.71E-02 |
| CA5A     | 5  | -0.04 | 0.02 | 5.96E-02 |
| CA6      | 12 | -0.03 | 0.02 | 1.31E-01 |
| CA9      | 5  | 0.07  | 0.08 | 3.83E-01 |
| CALB1    | 3  | 0.00  | 0.12 | 9.78E-01 |
| CALCA    | 7  | -0.07 | 0.09 | 4.51E-01 |
| CALCOCO1 | 4  | -0.06 | 0.11 | 6.17E-01 |
| CAMKK1   | 3  | -0.02 | 0.05 | 6.29E-01 |
| CANT1    | 7  | 0.16  | 0.07 | 2.70E-02 |
| CAPG     | 2  | 0.02  | 0.02 | 2.36E-01 |
| CARHSP1  | 1  | 0.17  | 0.18 | 3.29E-01 |
| CASP1    | 1  | -0.03 | 0.06 | 5.69E-01 |
| CASP10   | 3  | -0.02 | 0.08 | 8.33E-01 |
| CASP2    | 2  | 0.16  | 0.14 | 2.62E-01 |
| CASP3    | 2  | 0.04  | 0.14 | 7.54E-01 |
| CASP8    | 3  | 0.05  | 0.06 | 3.96E-01 |
| CBLIF    | 17 | -0.09 | 0.03 | 2.71E-03 |
| CBLN4    | 5  | 0.05  | 0.07 | 4.98E-01 |

|         |    |       |      |          |
|---------|----|-------|------|----------|
| CC2D1A  | 2  | 0.37  | 0.17 | 3.43E-02 |
| CCDC80  | 5  | 0.20  | 0.08 | 1.07E-02 |
| CCL11   | 9  | -0.10 | 0.05 | 3.99E-02 |
| CCL13   | 14 | 0.05  | 0.04 | 1.76E-01 |
| CCL14   | 6  | 0.02  | 0.03 | 4.45E-01 |
| CCL15   | 4  | 0.38  | 0.07 | 4.40E-08 |
| CCL16   | 8  | 0.02  | 0.02 | 4.34E-01 |
| CCL17   | 14 | 0.01  | 0.03 | 7.18E-01 |
| CCL18   | 4  | 0.04  | 0.03 | 2.22E-01 |
| CCL19   | 5  | -0.05 | 0.09 | 5.84E-01 |
| CCL2    | 8  | 0.08  | 0.04 | 6.40E-02 |
| CCL20   | 5  | -0.14 | 0.09 | 1.28E-01 |
| CCL21   | 10 | -0.13 | 0.07 | 7.47E-02 |
| CCL22   | 8  | -0.17 | 0.07 | 1.73E-02 |
| CCL23   | 6  | -0.04 | 0.04 | 2.78E-01 |
| CCL24   | 11 | 0.01  | 0.02 | 6.12E-01 |
| CCL25   | 9  | 0.06  | 0.02 | 1.84E-03 |
| CCL26   | 7  | -0.01 | 0.05 | 9.10E-01 |
| CCL27   | 7  | -0.07 | 0.06 | 2.11E-01 |
| CCL28   | 18 | -0.08 | 0.04 | 7.55E-02 |
| CCL3    | 6  | 0.10  | 0.11 | 3.67E-01 |
| CCL4    | 5  | -0.14 | 0.04 | 1.26E-04 |
| CCL5    | 9  | -0.01 | 0.05 | 9.04E-01 |
| CCL7    | 4  | -0.05 | 0.04 | 2.83E-01 |
| CCL8    | 10 | 0.02  | 0.02 | 1.86E-01 |
| CCN1    | 11 | -0.05 | 0.06 | 3.85E-01 |
| CCN2    | 16 | 0.04  | 0.04 | 2.82E-01 |
| CCN3    | 3  | -0.07 | 0.06 | 2.27E-01 |
| CCN4    | 12 | -0.05 | 0.03 | 1.33E-01 |
| CCN5    | 1  | -0.02 | 0.29 | 9.43E-01 |
| CCS     | 1  | 0.02  | 0.03 | 4.85E-01 |
| CD109   | 6  | -0.43 | 0.07 | 1.02E-10 |
| CD14    | 6  | 0.02  | 0.05 | 6.88E-01 |
| CD160   | 13 | -0.02 | 0.03 | 4.96E-01 |
| CD163   | 18 | -0.03 | 0.04 | 4.21E-01 |
| CD164   | 10 | 0.01  | 0.06 | 8.21E-01 |
| CD177   | 3  | -0.01 | 0.03 | 7.91E-01 |
| CD1C    | 18 | -0.10 | 0.04 | 1.86E-02 |
| CD200   | 8  | -0.06 | 0.06 | 3.02E-01 |
| CD200R1 | 9  | 0.00  | 0.02 | 7.95E-01 |
| CD207   | 15 | -0.02 | 0.03 | 4.64E-01 |
| CD209   | 8  | 0.11  | 0.02 | 3.79E-11 |
| CD22    | 20 | -0.04 | 0.04 | 3.72E-01 |
| CD244   | 13 | -0.08 | 0.04 | 6.60E-02 |
| CD27    | 6  | 0.00  | 0.05 | 9.80E-01 |
| CD274   | 7  | 0.02  | 0.04 | 6.14E-01 |
| CD276   | 7  | -0.01 | 0.02 | 6.34E-01 |
| CD28    | 10 | 0.05  | 0.05 | 2.56E-01 |
| CD2AP   | 1  | 0.21  | 0.22 | 3.51E-01 |
| CD300C  | 14 | 0.03  | 0.04 | 4.19E-01 |
| CD300E  | 10 | -0.06 | 0.04 | 1.20E-01 |
| CD300LF | 9  | 0.01  | 0.02 | 5.74E-01 |

|          |    |       |      |          |
|----------|----|-------|------|----------|
| CD300LG  | 12 | 0.05  | 0.03 | 1.27E-01 |
| CD302    | 6  | -0.01 | 0.04 | 8.55E-01 |
| CD33     | 7  | 0.00  | 0.01 | 7.21E-01 |
| CD34     | 3  | -0.23 | 0.04 | 1.39E-09 |
| CD38     | 2  | -0.04 | 0.04 | 3.40E-01 |
| CD4      | 4  | -0.12 | 0.04 | 2.11E-03 |
| CD40     | 9  | -0.07 | 0.03 | 2.89E-02 |
| CD40LG   | 12 | 0.18  | 0.06 | 1.84E-03 |
| CD46     | 7  | -0.17 | 0.08 | 3.91E-02 |
| CD48     | 13 | -0.02 | 0.02 | 2.45E-01 |
| CD5      | 8  | -0.06 | 0.06 | 2.95E-01 |
| CD55     | 6  | 0.00  | 0.03 | 8.88E-01 |
| CD58     | 12 | -0.17 | 0.03 | 2.20E-08 |
| CD59     | 4  | 0.02  | 0.06 | 7.40E-01 |
| CD6      | 11 | -0.01 | 0.03 | 8.17E-01 |
| CD63     | 9  | -0.01 | 0.06 | 8.86E-01 |
| CD69     | 6  | -0.02 | 0.08 | 7.69E-01 |
| CD70     | 3  | 0.00  | 0.02 | 9.57E-01 |
| CD74     | 6  | -0.03 | 0.06 | 6.37E-01 |
| CD79B    | 17 | -0.12 | 0.04 | 3.59E-03 |
| CD83     | 13 | -0.06 | 0.05 | 2.49E-01 |
| CD84     | 11 | -0.05 | 0.05 | 2.62E-01 |
| CD8A     | 5  | -0.01 | 0.04 | 8.35E-01 |
| CD93     | 5  | -0.21 | 0.10 | 3.24E-02 |
| CD99     | 4  | 0.15  | 0.10 | 1.24E-01 |
| CD99L2   | 9  | 0.02  | 0.06 | 7.51E-01 |
| CDC27    | 2  | 0.08  | 0.15 | 5.88E-01 |
| CDC37    | 2  | -0.01 | 0.17 | 9.60E-01 |
| CDCP1    | 8  | -0.14 | 0.05 | 4.87E-03 |
| CDH1     | 6  | 0.05  | 0.03 | 4.24E-02 |
| CDH15    | 4  | 0.30  | 0.05 | 1.03E-10 |
| CDH17    | 12 | -0.01 | 0.02 | 6.36E-01 |
| CDH2     | 13 | 0.01  | 0.06 | 9.22E-01 |
| CDH3     | 7  | -0.12 | 0.09 | 1.75E-01 |
| CDH5     | 10 | 0.01  | 0.02 | 7.85E-01 |
| CDH6     | 6  | 0.05  | 0.03 | 4.92E-02 |
| CDHR1    | 4  | 0.04  | 0.06 | 5.29E-01 |
| CDHR2    | 8  | 0.06  | 0.10 | 5.15E-01 |
| CDHR5    | 8  | -0.06 | 0.03 | 2.30E-02 |
| CDKN1A   | 5  | -0.07 | 0.08 | 3.43E-01 |
| CDKN2D   | 4  | 0.09  | 0.09 | 3.14E-01 |
| CDNF     | 1  | 0.01  | 0.04 | 8.16E-01 |
| CDON     | 4  | 0.11  | 0.11 | 3.29E-01 |
| CDSN     | 16 | -0.07 | 0.05 | 2.07E-01 |
| CEACAM1  | 6  | -0.02 | 0.05 | 6.32E-01 |
| CEACAM21 | 2  | -0.43 | 0.30 | 1.52E-01 |
| CEACAM3  | 1  | -0.20 | 0.24 | 4.07E-01 |
| CEACAM5  | 11 | -0.11 | 0.03 | 1.50E-04 |
| CEACAM8  | 12 | -0.06 | 0.05 | 2.37E-01 |
| CEBPB    | 2  | 0.36  | 0.19 | 5.33E-02 |
| CELA3A   | 15 | -0.10 | 0.03 | 1.76E-03 |
| CEP20    | 4  | 0.08  | 0.10 | 4.23E-01 |

|           |    |       |      |          |
|-----------|----|-------|------|----------|
| CEP43     | 6  | -0.12 | 0.10 | 2.29E-01 |
| CEP85     | 2  | 0.04  | 0.11 | 7.05E-01 |
| CERT      | 4  | 0.09  | 0.12 | 4.22E-01 |
| CES1      | 18 | 0.07  | 0.04 | 6.51E-02 |
| CES2      | 2  | -0.15 | 0.15 | 3.18E-01 |
| CES3      | 9  | -0.10 | 0.06 | 9.23E-02 |
| CETN2     | 3  | 0.03  | 0.12 | 8.37E-01 |
| CFC1      | 8  | 0.12  | 0.09 | 1.74E-01 |
| CGA       | 1  | -0.47 | 0.38 | 2.11E-01 |
| CGREF1    | 3  | 0.04  | 0.02 | 1.00E-01 |
| CHAC2     | 2  | 0.41  | 0.14 | 3.24E-03 |
| CHGB      | 6  | -0.05 | 0.02 | 4.81E-02 |
| CHI3L1    | 6  | 0.08  | 0.03 | 1.88E-02 |
| CHIT1     | 4  | -0.03 | 0.02 | 1.07E-01 |
| CHL1      | 6  | 0.00  | 0.04 | 9.89E-01 |
| CHMP1A    | 4  | 0.07  | 0.12 | 5.62E-01 |
| CHRDL1    | 4  | -0.06 | 0.15 | 6.91E-01 |
| CHRDL2    | 4  | -0.02 | 0.15 | 8.76E-01 |
| CIAPIN1   | 4  | -0.20 | 0.12 | 1.04E-01 |
| CKAP4     | 4  | -0.03 | 0.04 | 4.87E-01 |
| MT1A_CKMT | 6  | 0.38  | 0.09 | 1.75E-05 |
| CLC       | 9  | -0.03 | 0.06 | 5.81E-01 |
| CLEC10A   | 9  | 0.02  | 0.02 | 4.97E-01 |
| CLEC11A   | 7  | -0.08 | 0.05 | 9.93E-02 |
| CLEC14A   | 7  | -0.17 | 0.04 | 9.24E-05 |
| CLEC1A    | 6  | 0.01  | 0.03 | 7.70E-01 |
| CLEC1B    | 9  | 0.10  | 0.05 | 5.66E-02 |
| CLEC4A    | 11 | 0.00  | 0.03 | 9.21E-01 |
| CLEC4C    | 25 | 0.02  | 0.02 | 3.10E-01 |
| CLEC4D    | 10 | -0.01 | 0.02 | 8.13E-01 |
| CLEC4G    | 10 | 0.19  | 0.04 | 6.24E-07 |
| CLEC5A    | 10 | 0.03  | 0.04 | 4.20E-01 |
| CLEC6A    | 13 | 0.01  | 0.03 | 7.62E-01 |
| CLEC7A    | 2  | 0.01  | 0.02 | 4.23E-01 |
| CLIP2     | 2  | 0.06  | 0.10 | 5.89E-01 |
| CLMP      | 4  | 0.16  | 0.06 | 7.11E-03 |
| CLPS      | 7  | -0.03 | 0.04 | 3.54E-01 |
| CLSPN     | 1  | 0.06  | 0.15 | 6.88E-01 |
| CLSTN2    | 3  | 0.03  | 0.06 | 6.25E-01 |
| CLTA      | 1  | 0.06  | 0.12 | 6.09E-01 |
| CLUL1     | 8  | 0.00  | 0.03 | 9.77E-01 |
| CNDP1     | 8  | -0.06 | 0.03 | 4.51E-02 |
| CNPY2     | 1  | -0.06 | 0.12 | 6.28E-01 |
| CNPY4     | 3  | -0.05 | 0.07 | 5.37E-01 |
| CNST      | 4  | -0.03 | 0.14 | 8.08E-01 |
| CNTN1     | 7  | 0.09  | 0.04 | 2.52E-02 |
| CNTN2     | 5  | 0.20  | 0.12 | 1.03E-01 |
| CNTN3     | 16 | -0.01 | 0.04 | 7.14E-01 |
| CNTN4     | 10 | -0.01 | 0.05 | 8.85E-01 |
| CNTN5     | 6  | -0.04 | 0.04 | 4.22E-01 |
| CNTNAP2   | 4  | 0.03  | 0.04 | 4.19E-01 |
| COL18A1   | 4  | -0.07 | 0.08 | 3.98E-01 |

|         |    |       |      |          |
|---------|----|-------|------|----------|
| COL1A1  | 9  | -0.10 | 0.07 | 1.57E-01 |
| COL4A1  | 9  | 0.01  | 0.04 | 8.13E-01 |
| COL6A3  | 4  | 0.01  | 0.14 | 9.15E-01 |
| COL9A1  | 3  | 0.24  | 0.14 | 8.16E-02 |
| COLEC12 | 4  | 0.30  | 0.15 | 4.13E-02 |
| COMP    | 6  | 0.05  | 0.06 | 3.99E-01 |
| COMT    | 2  | -0.04 | 0.03 | 1.63E-01 |
| CORO1A  | 3  | 0.06  | 0.15 | 6.97E-01 |
| COX5B   | 4  | -0.20 | 0.14 | 1.56E-01 |
| CPA1    | 21 | -0.06 | 0.04 | 1.66E-01 |
| CPA2    | 4  | 0.03  | 0.04 | 5.23E-01 |
| CPB1    | 13 | -0.05 | 0.04 | 2.33E-01 |
| CPE     | 7  | -0.15 | 0.06 | 1.10E-02 |
| CPM     | 11 | 0.01  | 0.07 | 9.20E-01 |
| CPPED1  | 1  | -0.01 | 0.02 | 8.12E-01 |
| CPVL    | 12 | 0.02  | 0.02 | 3.23E-01 |
| CPXM1   | 18 | -0.01 | 0.03 | 6.92E-01 |
| CR2     | 23 | 0.01  | 0.04 | 7.86E-01 |
| CRACR2A | 4  | -0.04 | 0.09 | 6.50E-01 |
| CRADD   | 4  | -0.22 | 0.12 | 6.81E-02 |
| CREG1   | 11 | 0.01  | 0.05 | 8.13E-01 |
| CRELD2  | 11 | 0.00  | 0.04 | 9.36E-01 |
| CRH     | 23 | -0.03 | 0.03 | 3.73E-01 |
| CRHBP   | 5  | 0.02  | 0.03 | 4.55E-01 |
| CRIM1   | 4  | -0.40 | 0.14 | 3.37E-03 |
| CRIP2   | 4  | 0.17  | 0.09 | 5.83E-02 |
| CRISP2  | 13 | -0.02 | 0.03 | 5.56E-01 |
| CRKL    | 1  | -0.10 | 0.23 | 6.57E-01 |
| CRLF1   | 7  | -0.07 | 0.11 | 5.08E-01 |
| CRNN    | 3  | 0.04  | 0.02 | 6.15E-02 |
| CRTAC1  | 2  | 0.00  | 0.02 | 9.13E-01 |
| CRTAM   | 14 | -0.06 | 0.04 | 1.36E-01 |
| CSF1    | 3  | -0.08 | 0.07 | 2.16E-01 |
| CSF2RA  | 1  | 0.10  | 0.32 | 7.58E-01 |
| CSF3    | 3  | -0.11 | 0.10 | 2.46E-01 |
| CST3    | 6  | -0.03 | 0.07 | 6.76E-01 |
| CST5    | 13 | 0.02  | 0.02 | 4.04E-01 |
| CST6    | 15 | 0.02  | 0.05 | 7.00E-01 |
| CST7    | 11 | 0.00  | 0.02 | 9.73E-01 |
| CTF1    | 2  | -0.03 | 0.22 | 8.84E-01 |
| CTRB1   | 12 | -0.05 | 0.03 | 9.08E-02 |
| CTRC    | 11 | -0.03 | 0.02 | 2.51E-01 |
| CTSB    | 7  | 0.03  | 0.03 | 4.12E-01 |
| CTSC    | 6  | 0.02  | 0.02 | 4.07E-01 |
| CTSD    | 6  | 0.03  | 0.04 | 4.25E-01 |
| CTSF    | 15 | 0.02  | 0.04 | 6.37E-01 |
| CTSH    | 1  | 0.06  | 0.16 | 7.27E-01 |
| CTSL    | 17 | -0.03 | 0.05 | 5.83E-01 |
| CTSO    | 10 | -0.03 | 0.05 | 5.83E-01 |
| CTSS    | 7  | -0.24 | 0.08 | 2.68E-03 |
| CTSV    | 17 | 0.00  | 0.04 | 9.75E-01 |
| CTSZ    | 9  | 0.01  | 0.04 | 7.38E-01 |

|             |    |       |      |          |
|-------------|----|-------|------|----------|
| CX3CL1      | 7  | -0.56 | 0.09 | 3.62E-10 |
| CXADR       | 5  | 0.23  | 0.06 | 3.02E-05 |
| CXCL1       | 4  | 0.00  | 0.03 | 9.45E-01 |
| CXCL10      | 4  | -0.04 | 0.06 | 5.63E-01 |
| CXCL11      | 8  | -0.05 | 0.06 | 3.98E-01 |
| CXCL12      | 9  | -0.11 | 0.07 | 1.16E-01 |
| CXCL13      | 7  | -0.12 | 0.10 | 2.49E-01 |
| CXCL14      | 2  | 0.13  | 0.17 | 4.22E-01 |
| CXCL16      | 13 | 0.05  | 0.05 | 3.02E-01 |
| CXCL17      | 5  | -0.36 | 0.12 | 2.73E-03 |
| CXCL3       | 3  | -0.07 | 0.12 | 5.55E-01 |
| CXCL5       | 11 | -0.02 | 0.03 | 4.59E-01 |
| CXCL6       | 7  | -0.02 | 0.03 | 4.70E-01 |
| CXCL8       | 8  | 0.12  | 0.06 | 5.88E-02 |
| CXCL9       | 5  | -0.02 | 0.07 | 7.37E-01 |
| DAB2        | 3  | -0.43 | 0.15 | 3.31E-03 |
| DAG1        | 3  | 0.43  | 0.16 | 7.70E-03 |
| DAPP1       | 2  | 0.19  | 0.12 | 1.22E-01 |
| DARS1       | 5  | -0.08 | 0.11 | 4.51E-01 |
| DBI         | 3  | 0.13  | 0.05 | 1.67E-02 |
| DBNL        | 4  | 0.02  | 0.13 | 8.80E-01 |
| DCBLD2      | 16 | -0.04 | 0.04 | 3.75E-01 |
| DCN         | 1  | -0.33 | 0.23 | 1.43E-01 |
| DCTN1       | 1  | -0.08 | 0.22 | 7.09E-01 |
| DCTN2       | 2  | 0.00  | 0.20 | 9.90E-01 |
| DCTPP1      | 5  | 0.02  | 0.09 | 8.42E-01 |
| DCXR        | 6  | 0.06  | 0.09 | 5.04E-01 |
| DDAH1       | 5  | 0.07  | 0.07 | 3.32E-01 |
| DDC         | 7  | 0.00  | 0.04 | 9.88E-01 |
| DDR1        | 12 | -0.05 | 0.03 | 1.47E-01 |
| DDX58       | 1  | 0.04  | 0.08 | 6.09E-01 |
| DECR1       | 3  | 0.09  | 0.14 | 5.07E-01 |
| EFA1_DEFA1  | 15 | 0.05  | 0.06 | 4.30E-01 |
| EFB4A_DEFB4 | 3  | 0.09  | 0.15 | 5.45E-01 |
| DFFA        | 1  | 0.21  | 0.22 | 3.51E-01 |
| DIABLO      | 3  | -0.21 | 0.16 | 1.86E-01 |
| DKK1        | 10 | 0.05  | 0.05 | 3.22E-01 |
| DKK3        | 7  | -0.07 | 0.04 | 5.78E-02 |
| DKK4        | 6  | 0.04  | 0.05 | 4.61E-01 |
| DKKL1       | 5  | -0.01 | 0.01 | 6.30E-01 |
| DLK1        | 6  | -0.01 | 0.03 | 7.24E-01 |
| DLL1        | 6  | 0.05  | 0.07 | 4.30E-01 |
| DNAJA2      | 1  | -0.22 | 0.23 | 3.38E-01 |
| DNAJB1      | 6  | 0.01  | 0.10 | 9.15E-01 |
| DNAJB8      | 2  | 0.18  | 0.16 | 2.58E-01 |
| DNER        | 7  | 0.00  | 0.05 | 9.53E-01 |
| DNMBP       | 3  | 0.07  | 0.13 | 6.01E-01 |
| DNPH1       | 1  | -0.06 | 0.05 | 2.59E-01 |
| DOK2        | 4  | -0.14 | 0.11 | 2.10E-01 |
| DPEP1       | 7  | 0.00  | 0.02 | 9.70E-01 |
| DPEP2       | 3  | -0.03 | 0.09 | 7.12E-01 |
| DPP10       | 5  | -0.10 | 0.05 | 3.79E-02 |



|           |    |       |      |          |
|-----------|----|-------|------|----------|
| DPP4      | 5  | 0.06  | 0.06 | 3.50E-01 |
| DPP6      | 7  | -0.10 | 0.05 | 3.80E-02 |
| DPP7      | 7  | -0.02 | 0.06 | 7.19E-01 |
| DPT       | 1  | 0.03  | 0.04 | 5.42E-01 |
| DPY30     | 2  | -0.24 | 0.18 | 1.95E-01 |
| DRAXIN    | 17 | -0.11 | 0.05 | 1.40E-02 |
| DRG2      | 3  | 0.20  | 0.10 | 5.00E-02 |
| DSC2      | 9  | 0.04  | 0.05 | 3.66E-01 |
| DSG2      | 10 | 0.00  | 0.04 | 9.07E-01 |
| DSG3      | 17 | 0.07  | 0.04 | 7.71E-02 |
| DSG4      | 22 | -0.05 | 0.04 | 2.44E-01 |
| DTX3      | 3  | 0.01  | 0.07 | 8.70E-01 |
| DUSP3     | 1  | -0.58 | 0.23 | 1.10E-02 |
| EBAG9     | 5  | 0.09  | 0.10 | 3.65E-01 |
| EBI3_IL27 | 19 | -0.02 | 0.04 | 5.86E-01 |
| ECE1      | 4  | -0.04 | 0.10 | 6.74E-01 |
| EDA2R     | 3  | 0.43  | 0.18 | 1.71E-02 |
| EDAR      | 23 | 0.03  | 0.03 | 3.18E-01 |
| EDIL3     | 3  | 0.07  | 0.10 | 5.11E-01 |
| EFEMP1    | 4  | -0.08 | 0.07 | 2.34E-01 |
| EFNA1     | 4  | 0.07  | 0.04 | 8.09E-02 |
| EFNA4     | 5  | -0.02 | 0.10 | 8.10E-01 |
| EGF       | 11 | 0.09  | 0.06 | 1.11E-01 |
| EGFL7     | 18 | 0.00  | 0.04 | 9.42E-01 |
| EGFR      | 6  | 0.09  | 0.09 | 3.40E-01 |
| EGLN1     | 4  | -0.10 | 0.08 | 2.42E-01 |
| EIF4B     | 3  | -0.13 | 0.12 | 3.06E-01 |
| EIF4G1    | 3  | 0.01  | 0.12 | 9.56E-01 |
| ELOA      | 2  | -0.02 | 0.10 | 8.37E-01 |
| ENAH      | 1  | 0.15  | 0.14 | 2.80E-01 |
| ENG       | 8  | -0.12 | 0.03 | 6.73E-06 |
| ENO1      | 4  | 0.17  | 0.11 | 1.18E-01 |
| ENO2      | 5  | -0.07 | 0.08 | 3.61E-01 |
| ENPP2     | 8  | 0.01  | 0.05 | 8.86E-01 |
| ENPP5     | 7  | -0.03 | 0.03 | 2.31E-01 |
| ENPP7     | 6  | 0.01  | 0.02 | 8.11E-01 |
| ENTPD2    | 2  | 0.10  | 0.24 | 6.77E-01 |
| ENTPD5    | 9  | 0.01  | 0.03 | 7.84E-01 |
| ENTPD6    | 7  | 0.02  | 0.02 | 3.79E-01 |
| EPCAM     | 14 | 0.13  | 0.04 | 1.94E-04 |
| EPHA1     | 7  | -0.12 | 0.06 | 3.70E-02 |
| EPHA2     | 6  | 0.25  | 0.09 | 4.87E-03 |
| EPHB4     | 10 | -0.16 | 0.04 | 1.70E-05 |
| EPHB6     | 4  | 0.09  | 0.06 | 1.43E-01 |
| EPO       | 9  | 0.06  | 0.06 | 2.89E-01 |
| EPS8L2    | 3  | 0.00  | 0.05 | 9.77E-01 |
| ERBB2     | 9  | 0.03  | 0.06 | 5.97E-01 |
| ERBB3     | 9  | 0.09  | 0.05 | 6.89E-02 |
| ERBB4     | 16 | -0.27 | 0.05 | 1.04E-08 |
| ERBIN     | 3  | -0.13 | 0.16 | 3.92E-01 |
| EREG      | 10 | 0.04  | 0.07 | 5.79E-01 |
| ERP44     | 6  | 0.04  | 0.03 | 1.87E-01 |

|        |    |       |      |          |
|--------|----|-------|------|----------|
| ESAM   | 8  | 0.11  | 0.06 | 8.48E-02 |
| ESM1   | 11 | -0.12 | 0.06 | 4.74E-02 |
| EZR    | 2  | -0.07 | 0.17 | 6.63E-01 |
| F11R   | 11 | 0.12  | 0.07 | 1.08E-01 |
| F2R    | 7  | -0.08 | 0.07 | 2.23E-01 |
| F3     | 9  | 0.04  | 0.03 | 2.65E-01 |
| F7     | 7  | 0.05  | 0.03 | 4.95E-02 |
| F9     | 2  | 0.24  | 0.12 | 4.87E-02 |
| FABP1  | 2  | 0.01  | 0.06 | 8.53E-01 |
| FABP2  | 5  | 0.12  | 0.08 | 1.44E-01 |
| FABP4  | 2  | 0.17  | 0.14 | 2.09E-01 |
| FABP5  | 2  | 0.22  | 0.18 | 2.36E-01 |
| FABP6  | 4  | 0.06  | 0.06 | 2.97E-01 |
| FABP9  | 16 | 0.06  | 0.03 | 4.53E-02 |
| FADD   | 3  | -0.10 | 0.14 | 4.80E-01 |
| FAM3B  | 6  | -0.07 | 0.02 | 4.15E-03 |
| FAM3C  | 2  | 0.02  | 0.17 | 8.89E-01 |
| FAP    | 6  | -0.08 | 0.05 | 1.32E-01 |
| FAS    | 4  | 0.09  | 0.05 | 1.10E-01 |
| FASLG  | 21 | 0.03  | 0.03 | 3.54E-01 |
| FBP1   | 5  | 0.02  | 0.06 | 7.83E-01 |
| FCAR   | 14 | -0.06 | 0.02 | 1.10E-03 |
| FCER2  | 14 | -0.04 | 0.04 | 3.65E-01 |
| FCGR2A | 5  | 0.00  | 0.01 | 9.13E-01 |
| FCGR2B | 4  | -0.10 | 0.03 | 3.54E-04 |
| FCGR3B | 10 | -0.04 | 0.05 | 3.59E-01 |
| FCN2   | 11 | -0.04 | 0.02 | 2.56E-02 |
| FCRL1  | 26 | -0.05 | 0.03 | 7.80E-02 |
| FCRL2  | 16 | 0.04  | 0.02 | 1.12E-01 |
| FCRL3  | 5  | -0.02 | 0.01 | 9.56E-02 |
| FCRL5  | 9  | 0.09  | 0.07 | 1.82E-01 |
| FCRL6  | 5  | -0.02 | 0.02 | 3.46E-01 |
| FCRLB  | 7  | 0.03  | 0.03 | 3.35E-01 |
| FEN1   | 1  | -0.13 | 0.28 | 6.36E-01 |
| FES    | 1  | 0.06  | 0.10 | 5.79E-01 |
| FETUB  | 4  | -0.02 | 0.05 | 5.90E-01 |
| FGF19  | 5  | 0.30  | 0.05 | 5.26E-09 |
| FGF2   | 6  | 0.00  | 0.02 | 9.15E-01 |
| FGF21  | 7  | 0.07  | 0.06 | 3.08E-01 |
| FGF23  | 5  | -0.10 | 0.08 | 2.04E-01 |
| FGF5   | 2  | -0.02 | 0.03 | 5.60E-01 |
| FGFBP1 | 13 | -0.07 | 0.06 | 2.08E-01 |
| FGFR2  | 8  | 0.22  | 0.09 | 1.40E-02 |
| FGR    | 1  | -0.12 | 0.17 | 4.75E-01 |
| FHIT   | 2  | -0.03 | 0.14 | 8.16E-01 |
| FIS1   | 4  | -0.11 | 0.08 | 1.33E-01 |
| FKBP1B | 4  | 0.02  | 0.06 | 6.83E-01 |
| FKBP4  | 5  | -0.04 | 0.10 | 7.13E-01 |
| FKBP5  | 5  | -0.05 | 0.06 | 4.83E-01 |
| FLI1   | 3  | -0.19 | 0.14 | 1.59E-01 |
| FLRT2  | 11 | 0.02  | 0.03 | 5.16E-01 |
| FLT1   | 8  | -0.08 | 0.05 | 9.16E-02 |

|           |    |       |      |          |
|-----------|----|-------|------|----------|
| FLT3      | 5  | -0.16 | 0.10 | 1.18E-01 |
| FLT3LG    | 20 | 0.01  | 0.04 | 7.07E-01 |
| FLT4      | 11 | -0.03 | 0.02 | 1.23E-01 |
| FOLR1     | 8  | -0.13 | 0.07 | 7.12E-02 |
| FOLR2     | 14 | -0.02 | 0.04 | 6.10E-01 |
| FOLR3     | 10 | -0.10 | 0.07 | 1.86E-01 |
| FOXO1     | 4  | 0.02  | 0.09 | 8.35E-01 |
| FRZB      | 4  | -0.02 | 0.03 | 5.73E-01 |
| FST       | 3  | 0.09  | 0.08 | 2.46E-01 |
| FSTL3     | 2  | 0.01  | 0.15 | 9.27E-01 |
| FUCA1     | 5  | -0.01 | 0.01 | 3.44E-01 |
| FURIN     | 3  | 0.00  | 0.07 | 9.83E-01 |
| FUS       | 2  | 0.02  | 0.15 | 8.97E-01 |
| FUT3_FUT5 | 14 | -0.01 | 0.02 | 6.81E-01 |
| FUT8      | 12 | -0.01 | 0.02 | 7.73E-01 |
| FXN       | 3  | -0.17 | 0.15 | 2.65E-01 |
| FXND5     | 2  | -0.08 | 0.15 | 5.84E-01 |
| FYB1      | 2  | 0.35  | 0.16 | 3.05E-02 |
| GAL       | 21 | 0.00  | 0.04 | 9.78E-01 |
| GALNT10   | 9  | 0.01  | 0.05 | 7.73E-01 |
| GALNT2    | 7  | 0.03  | 0.05 | 4.78E-01 |
| GALNT3    | 7  | 0.02  | 0.03 | 5.80E-01 |
| GALNT7    | 6  | -0.05 | 0.04 | 2.54E-01 |
| GAS6      | 15 | 0.00  | 0.03 | 9.67E-01 |
| GBP2      | 1  | -0.03 | 0.14 | 8.17E-01 |
| GBP4      | 1  | 0.05  | 0.02 | 3.20E-02 |
| GCG       | 5  | 0.03  | 0.12 | 8.02E-01 |
| GCNT1     | 7  | 0.02  | 0.03 | 4.38E-01 |
| GDF15     | 1  | 0.07  | 0.05 | 1.69E-01 |
| GDF2      | 14 | 0.02  | 0.05 | 7.64E-01 |
| GDNF      | 1  | 0.01  | 0.06 | 9.04E-01 |
| GFAP      | 7  | -0.10 | 0.10 | 3.22E-01 |
| GFER      | 1  | 0.01  | 0.22 | 9.52E-01 |
| GFRA1     | 3  | 0.09  | 0.05 | 9.16E-02 |
| GFRA2     | 7  | 0.06  | 0.04 | 1.57E-01 |
| GFRA3     | 21 | 0.01  | 0.04 | 7.85E-01 |
| GGH       | 9  | -0.02 | 0.03 | 5.06E-01 |
| GGT1      | 7  | -0.08 | 0.06 | 2.18E-01 |
| GGT5      | 4  | 0.07  | 0.05 | 2.02E-01 |
| GHRL      | 10 | -0.01 | 0.06 | 9.31E-01 |
| GKN1      | 4  | 0.26  | 0.12 | 2.36E-02 |
| GLB1      | 9  | 0.04  | 0.04 | 2.86E-01 |
| GLO1      | 1  | -0.04 | 0.06 | 4.81E-01 |
| GLOD4     | 2  | 0.08  | 0.19 | 6.88E-01 |
| GLRX      | 2  | -0.04 | 0.03 | 2.20E-01 |
| GLT8D2    | 1  | -0.07 | 0.09 | 4.11E-01 |
| GMPR      | 2  | -0.01 | 0.06 | 8.01E-01 |
| GNE       | 3  | -0.05 | 0.10 | 6.28E-01 |
| GNLY      | 12 | 0.01  | 0.02 | 7.47E-01 |
| GOLM2     | 9  | 0.19  | 0.04 | 4.95E-06 |
| GOPC      | 2  | 0.08  | 0.15 | 6.02E-01 |
| GP1BA     | 16 | 0.06  | 0.05 | 2.20E-01 |

|          |    |       |      |          |
|----------|----|-------|------|----------|
| GP2      | 8  | 0.10  | 0.02 | 1.10E-05 |
| GP6      | 6  | 0.09  | 0.04 | 5.00E-02 |
| GPA33    | 13 | 0.09  | 0.03 | 5.01E-03 |
| GPC1     | 17 | -0.11 | 0.04 | 4.61E-03 |
| GPC5     | 10 | -0.01 | 0.02 | 5.08E-01 |
| GPNMB    | 6  | 0.03  | 0.04 | 4.05E-01 |
| GPR37    | 10 | 0.00  | 0.02 | 8.07E-01 |
| GRAP2    | 3  | -0.10 | 0.14 | 4.91E-01 |
| GRK5     | 1  | 0.04  | 0.06 | 4.50E-01 |
| GRN      | 12 | -0.04 | 0.02 | 4.48E-02 |
| GRPEL1   | 3  | -0.09 | 0.12 | 4.70E-01 |
| GSAP     | 1  | 0.20  | 0.22 | 3.67E-01 |
| GSTA1    | 9  | -0.05 | 0.05 | 3.13E-01 |
| GSTA3    | 5  | -0.09 | 0.06 | 1.24E-01 |
| GSTP1    | 1  | 0.08  | 0.09 | 3.73E-01 |
| GUCA2A   | 7  | -0.06 | 0.08 | 4.31E-01 |
| GUSB     | 12 | 0.03  | 0.04 | 5.32E-01 |
| GYS1     | 3  | -0.01 | 0.06 | 8.99E-01 |
| GZMA     | 14 | 0.01  | 0.06 | 8.41E-01 |
| GZMB     | 10 | -0.05 | 0.05 | 2.65E-01 |
| GZMH     | 8  | -0.06 | 0.06 | 3.16E-01 |
| HAGH     | 1  | -0.02 | 0.23 | 9.20E-01 |
| HAO1     | 8  | -0.03 | 0.08 | 7.59E-01 |
| HARS1    | 2  | 0.02  | 0.16 | 9.18E-01 |
| HAVCR1   | 7  | 0.06  | 0.03 | 2.15E-02 |
| HAVCR2   | 8  | -0.04 | 0.06 | 4.74E-01 |
| HBEGF    | 23 | 0.02  | 0.04 | 6.31E-01 |
| HBQ1     | 2  | -0.03 | 0.04 | 5.00E-01 |
| HCLS1    | 4  | -0.05 | 0.10 | 6.45E-01 |
| HDGF     | 2  | -0.04 | 0.01 | 8.41E-04 |
| HEBP1    | 1  | -0.08 | 0.12 | 4.96E-01 |
| HEXIM1   | 4  | 0.05  | 0.09 | 5.53E-01 |
| HGF      | 5  | -0.13 | 0.08 | 8.95E-02 |
| HGS      | 4  | 0.01  | 0.13 | 9.12E-01 |
| HLA-DRA  | 2  | -0.13 | 0.16 | 4.20E-01 |
| HLA-E    | 4  | 0.10  | 0.05 | 2.95E-02 |
| HMBS     | 1  | 0.01  | 0.12 | 8.98E-01 |
| HMOX1    | 18 | 0.00  | 0.04 | 9.23E-01 |
| HMOX2    | 4  | 0.00  | 0.09 | 9.66E-01 |
| HNMT     | 4  | 0.02  | 0.02 | 2.81E-01 |
| HNRNPK   | 1  | -0.11 | 0.24 | 6.57E-01 |
| HPGDS    | 2  | 0.02  | 0.03 | 5.78E-01 |
| HS3ST3B1 | 10 | 0.01  | 0.04 | 8.73E-01 |
| HS6ST1   | 15 | -0.05 | 0.05 | 2.59E-01 |
| HSD11B1  | 12 | 0.01  | 0.04 | 9.06E-01 |
| HSPA1A   | 3  | -0.10 | 0.14 | 4.47E-01 |
| HSPB1    | 5  | -0.12 | 0.10 | 2.34E-01 |
| HSPB6    | 4  | -0.23 | 0.15 | 1.16E-01 |
| HSPG2    | 4  | 0.02  | 0.08 | 8.10E-01 |
| HTRA2    | 1  | -0.12 | 0.28 | 6.57E-01 |
| HYAL1    | 3  | -0.01 | 0.05 | 7.94E-01 |
| HYOU1    | 13 | 0.09  | 0.05 | 7.75E-02 |

|             |    |       |      |          |
|-------------|----|-------|------|----------|
| ICA1        | 2  | -0.02 | 0.07 | 7.36E-01 |
| ICAM1       | 6  | -0.19 | 0.03 | 3.42E-09 |
| ICAM2       | 10 | -0.05 | 0.01 | 3.25E-04 |
| ICAM3       | 21 | -0.11 | 0.03 | 2.47E-04 |
| ICAM4       | 14 | 0.11  | 0.05 | 1.83E-02 |
| ICAM5       | 6  | -0.12 | 0.02 | 2.14E-11 |
| ICOSLG      | 3  | 0.01  | 0.14 | 9.40E-01 |
| IDI2        | 1  | 0.00  | 0.04 | 9.38E-01 |
| IDS         | 3  | -0.12 | 0.06 | 6.74E-02 |
| IDUA        | 13 | 0.00  | 0.02 | 8.75E-01 |
| IFNG        | 2  | -0.65 | 0.22 | 2.36E-03 |
| IFNGR1      | 10 | -0.01 | 0.05 | 9.02E-01 |
| IFNGR2      | 9  | 0.00  | 0.01 | 9.13E-01 |
| IFNL1       | 5  | -0.06 | 0.10 | 5.69E-01 |
| IFNLR1      | 3  | -0.02 | 0.05 | 7.20E-01 |
| IGF1R       | 9  | -0.21 | 0.03 | 2.42E-10 |
| IGF2R       | 14 | -0.01 | 0.03 | 7.32E-01 |
| IGFBP1      | 2  | 0.04  | 0.14 | 7.68E-01 |
| IGFBP2      | 4  | -0.16 | 0.12 | 1.90E-01 |
| IGFBP3      | 5  | 0.00  | 0.03 | 8.81E-01 |
| IGFBP4      | 3  | -0.02 | 0.17 | 9.18E-01 |
| IGFBP6      | 3  | -0.01 | 0.16 | 9.53E-01 |
| IGFBP7      | 3  | 0.02  | 0.05 | 6.46E-01 |
| IGFBPL1     | 2  | 0.01  | 0.04 | 7.08E-01 |
| IGSF3       | 5  | -0.09 | 0.09 | 3.44E-01 |
| IGSF8       | 5  | 0.09  | 0.08 | 2.34E-01 |
| IKBKG       | 1  | 0.27  | 0.29 | 3.51E-01 |
| IKZF2       | 2  | 0.03  | 0.14 | 8.45E-01 |
| IL10        | 5  | -0.01 | 0.06 | 8.62E-01 |
| IL10RA      | 1  | 0.03  | 0.10 | 7.77E-01 |
| IL10RB      | 6  | 0.04  | 0.04 | 3.21E-01 |
| IL11        | 1  | -0.27 | 0.54 | 6.16E-01 |
| IL12A_IL12B | 17 | -0.03 | 0.02 | 1.42E-01 |
| IL12B       | 20 | -0.03 | 0.02 | 1.56E-01 |
| IL12RB1     | 5  | -0.02 | 0.03 | 5.54E-01 |
| IL13        | 1  | -0.26 | 0.21 | 2.25E-01 |
| IL13RA1     | 2  | 0.03  | 0.16 | 8.26E-01 |
| IL15        | 21 | 0.07  | 0.04 | 1.12E-01 |
| IL15RA      | 1  | 0.02  | 0.06 | 7.71E-01 |
| IL16        | 1  | -0.05 | 0.22 | 8.21E-01 |
| IL17C       | 3  | -0.07 | 0.11 | 5.60E-01 |
| IL17D       | 3  | -0.09 | 0.04 | 2.55E-02 |
| IL17F       | 1  | 0.10  | 0.28 | 7.18E-01 |
| IL17RA      | 3  | 0.00  | 0.03 | 8.80E-01 |
| IL17RB      | 10 | -0.04 | 0.02 | 4.67E-02 |
| IL18        | 9  | -0.06 | 0.04 | 7.33E-02 |
| IL18BP      | 9  | -0.12 | 0.07 | 7.20E-02 |
| IL18R1      | 12 | -0.02 | 0.02 | 3.16E-01 |
| IL18RAP     | 3  | 0.12  | 0.10 | 2.48E-01 |
| IL19        | 4  | -0.14 | 0.03 | 1.54E-06 |
| IL1A        | 1  | 0.02  | 0.14 | 8.69E-01 |
| IL1B        | 2  | -0.04 | 0.06 | 5.01E-01 |

|          |    |       |      |          |
|----------|----|-------|------|----------|
| IL1R1    | 13 | -0.01 | 0.03 | 7.68E-01 |
| IL1R2    | 13 | 0.04  | 0.03 | 1.34E-01 |
| IL1RAP   | 4  | -0.04 | 0.02 | 9.89E-03 |
| IL1RL1   | 13 | -0.02 | 0.02 | 3.91E-01 |
| IL1RL2   | 12 | 0.01  | 0.03 | 6.52E-01 |
| IL1RN    | 2  | -0.02 | 0.07 | 8.23E-01 |
| IL20RA   | 1  | 0.02  | 0.28 | 9.49E-01 |
| IL22RA1  | 2  | 0.16  | 0.05 | 9.98E-04 |
| IL2RA    | 8  | 0.01  | 0.03 | 7.20E-01 |
| IL32     | 7  | 0.02  | 0.06 | 7.78E-01 |
| IL33     | 1  | 0.32  | 0.56 | 5.65E-01 |
| IL34     | 1  | -0.01 | 0.03 | 7.24E-01 |
| IL3RA    | 4  | -0.12 | 0.12 | 3.31E-01 |
| IL4R     | 5  | -0.06 | 0.04 | 1.19E-01 |
| IL5RA    | 23 | 0.04  | 0.03 | 1.71E-01 |
| IL6      | 3  | -0.18 | 0.08 | 2.26E-02 |
| IL6R     | 5  | -0.03 | 0.01 | 1.03E-02 |
| IL6ST    | 10 | -0.07 | 0.04 | 9.86E-02 |
| IL7      | 3  | -0.15 | 0.11 | 1.99E-01 |
| IL7R     | 12 | -0.06 | 0.02 | 5.01E-04 |
| ILKAP    | 1  | -0.11 | 0.25 | 6.57E-01 |
| IMPA1    | 2  | -0.07 | 0.07 | 3.26E-01 |
| ING1     | 1  | -0.12 | 0.27 | 6.57E-01 |
| INHBC    | 6  | 0.03  | 0.04 | 3.98E-01 |
| INPP1    | 3  | -0.20 | 0.14 | 1.40E-01 |
| IPCEF1   | 2  | 0.10  | 0.14 | 4.98E-01 |
| IQGAP2   | 1  | -0.01 | 0.13 | 9.65E-01 |
| IRAG2    | 2  | -0.36 | 0.17 | 3.92E-02 |
| IRAK1    | 1  | 0.23  | 0.25 | 3.51E-01 |
| ISLR2    | 8  | -0.14 | 0.02 | 1.50E-08 |
| ISM1     | 2  | -0.06 | 0.08 | 4.55E-01 |
| ITGA11   | 5  | 0.04  | 0.06 | 4.51E-01 |
| ITGA5    | 10 | -0.05 | 0.06 | 4.38E-01 |
| ITGA6    | 7  | -0.11 | 0.05 | 1.67E-02 |
| ITGAM    | 9  | -0.09 | 0.06 | 1.14E-01 |
| ITGAV    | 5  | -0.09 | 0.08 | 2.81E-01 |
| ITGB1    | 7  | -0.14 | 0.07 | 5.42E-02 |
| ITGB1BP2 | 4  | -0.01 | 0.11 | 9.40E-01 |
| ITGB2    | 10 | -0.14 | 0.05 | 1.14E-02 |
| ITGB5    | 5  | 0.04  | 0.10 | 6.92E-01 |
| ITGB6    | 9  | -0.09 | 0.05 | 5.59E-02 |
| ITGB7    | 18 | -0.01 | 0.03 | 7.92E-01 |
| ITIH3    | 7  | -0.06 | 0.04 | 1.58E-01 |
| ITM2A    | 2  | -0.07 | 0.07 | 2.61E-01 |
| JAM2     | 6  | -0.03 | 0.07 | 6.39E-01 |
| JCHAIN   | 14 | -0.01 | 0.07 | 8.94E-01 |
| KAZALD1  | 6  | -0.03 | 0.02 | 1.20E-01 |
| KDR      | 11 | -0.03 | 0.03 | 3.63E-01 |
| KEL      | 16 | -0.14 | 0.03 | 1.42E-07 |
| KIFBP    | 3  | 0.07  | 0.10 | 4.52E-01 |
| KIR2DL3  | 4  | 0.04  | 0.03 | 1.45E-01 |
| KIR3DL1  | 1  | 0.71  | 0.41 | 8.38E-02 |

|            |    |       |      |          |
|------------|----|-------|------|----------|
| KIRREL2    | 8  | 0.00  | 0.03 | 9.73E-01 |
| KIT        | 22 | -0.02 | 0.04 | 6.64E-01 |
| KITLG      | 15 | -0.03 | 0.04 | 4.60E-01 |
| KLB        | 9  | 0.00  | 0.02 | 8.98E-01 |
| KLK1       | 13 | -0.09 | 0.02 | 8.62E-09 |
| KLK10      | 3  | 0.02  | 0.03 | 4.36E-01 |
| KLK11      | 5  | -0.05 | 0.04 | 2.22E-01 |
| KLK12      | 5  | -0.04 | 0.02 | 3.24E-02 |
| KLK13      | 10 | 0.00  | 0.03 | 9.64E-01 |
| KLK14      | 9  | 0.01  | 0.04 | 7.19E-01 |
| KLK4       | 3  | -0.01 | 0.05 | 7.80E-01 |
| KLK6       | 2  | -0.03 | 0.08 | 7.15E-01 |
| KLK8       | 4  | 0.06  | 0.04 | 7.49E-02 |
| KLRB1      | 10 | -0.14 | 0.06 | 1.91E-02 |
| KLRD1      | 12 | 0.01  | 0.03 | 6.30E-01 |
| KRT18      | 9  | -0.13 | 0.07 | 7.17E-02 |
| KRT19      | 3  | 0.24  | 0.09 | 1.09E-02 |
| KRT5       | 4  | 0.04  | 0.08 | 6.15E-01 |
| KYAT1      | 4  | 0.12  | 0.13 | 3.50E-01 |
| KYNU       | 4  | 0.03  | 0.05 | 5.97E-01 |
| LICAM      | 6  | -0.06 | 0.07 | 4.05E-01 |
| LACTB2     | 3  | 0.20  | 0.10 | 5.17E-02 |
| LAG3       | 12 | -0.12 | 0.05 | 7.98E-03 |
| LAIR1      | 4  | 0.07  | 0.05 | 1.45E-01 |
| LAIR2      | 5  | 0.00  | 0.02 | 8.67E-01 |
| LAMA4      | 11 | 0.00  | 0.04 | 9.10E-01 |
| LAMP2      | 2  | 0.30  | 0.22 | 1.61E-01 |
| LAMP3      | 10 | -0.41 | 0.06 | 1.88E-10 |
| LAT        | 6  | 0.04  | 0.09 | 6.50E-01 |
| LAT2       | 1  | 0.21  | 0.23 | 3.51E-01 |
| LAYN       | 4  | -0.04 | 0.04 | 2.39E-01 |
| LBP        | 2  | -0.02 | 0.02 | 5.04E-01 |
| LBR        | 6  | -0.06 | 0.07 | 3.58E-01 |
| LCN2       | 17 | 0.05  | 0.06 | 4.14E-01 |
| LDLR       | 16 | 0.02  | 0.04 | 6.19E-01 |
| LEFTY2     | 4  | -0.63 | 0.14 | 8.97E-06 |
| LEP        | 1  | 0.93  | 0.32 | 3.35E-03 |
| LEPR       | 9  | 0.03  | 0.05 | 4.73E-01 |
| LGALS1     | 2  | -0.02 | 0.07 | 8.02E-01 |
| LGALS3     | 5  | -0.07 | 0.04 | 8.46E-02 |
| LGALS4     | 3  | -0.19 | 0.03 | 3.53E-11 |
| ALS7_LGALS | 7  | 0.14  | 0.04 | 7.56E-05 |
| LGALS8     | 6  | -0.16 | 0.03 | 5.75E-08 |
| LGALS9     | 4  | -0.06 | 0.04 | 2.05E-01 |
| LGMN       | 18 | 0.02  | 0.04 | 6.88E-01 |
| LHB        | 2  | 0.30  | 0.18 | 9.27E-02 |
| LIFR       | 11 | -0.17 | 0.03 | 1.10E-06 |
| LILRA2     | 10 | -0.14 | 0.07 | 6.08E-02 |
| LILRA5     | 9  | -0.07 | 0.06 | 2.15E-01 |
| LILRB1     | 9  | 0.04  | 0.04 | 2.59E-01 |
| LILRB2     | 10 | -0.02 | 0.02 | 3.73E-01 |
| LILRB4     | 4  | -0.03 | 0.09 | 7.02E-01 |

|        |    |       |      |          |
|--------|----|-------|------|----------|
| LILRB5 | 3  | 0.00  | 0.01 | 9.64E-01 |
| LPCAT2 | 1  | -0.29 | 0.12 | 1.67E-02 |
| LPL    | 8  | -0.07 | 0.04 | 4.63E-02 |
| LPO    | 12 | -0.03 | 0.03 | 3.33E-01 |
| LRIG1  | 10 | -0.01 | 0.02 | 6.45E-01 |
| LRP1   | 11 | -0.01 | 0.02 | 6.31E-01 |
| LRP11  | 6  | 0.04  | 0.02 | 6.67E-02 |
| LRPAP1 | 7  | -0.01 | 0.02 | 7.24E-01 |
| LRRC25 | 13 | -0.02 | 0.03 | 4.55E-01 |
| LRRN1  | 7  | 0.01  | 0.02 | 6.15E-01 |
| LSP1   | 2  | -0.13 | 0.10 | 1.73E-01 |
| LTA    | 10 | 0.00  | 0.02 | 8.44E-01 |
| LTA4H  | 1  | -0.17 | 0.15 | 2.63E-01 |
| LTBP2  | 7  | -0.25 | 0.08 | 2.50E-03 |
| LTBP3  | 6  | -0.01 | 0.03 | 5.97E-01 |
| LTBR   | 13 | 0.00  | 0.04 | 9.84E-01 |
| LXN    | 2  | -0.09 | 0.08 | 2.59E-01 |
| LY6D   | 5  | -0.03 | 0.05 | 5.80E-01 |
| LY75   | 6  | -0.01 | 0.01 | 6.64E-01 |
| LY9    | 14 | -0.01 | 0.03 | 7.91E-01 |
| LY96   | 10 | -0.07 | 0.08 | 4.03E-01 |
| LYAR   | 1  | -0.01 | 0.29 | 9.69E-01 |
| LYN    | 5  | -0.03 | 0.12 | 7.98E-01 |
| LYPD3  | 17 | -0.10 | 0.03 | 1.31E-04 |
| LYPD8  | 7  | -0.01 | 0.04 | 7.59E-01 |
| MAD1L1 | 1  | -0.14 | 0.14 | 3.02E-01 |
| MAGED1 | 2  | -0.02 | 0.14 | 8.70E-01 |
| MANF   | 6  | 0.05  | 0.11 | 6.57E-01 |
| MANSC1 | 17 | -0.11 | 0.06 | 5.23E-02 |
| MAP2K6 | 2  | -0.46 | 0.16 | 4.75E-03 |
| MAP3K5 | 1  | 0.24  | 0.26 | 3.51E-01 |
| MAP4K5 | 3  | 0.06  | 0.08 | 4.34E-01 |
| MAPK9  | 1  | -0.22 | 0.12 | 6.58E-02 |
| MARCO  | 9  | -0.10 | 0.04 | 1.88E-02 |
| MASP1  | 13 | 0.00  | 0.03 | 9.44E-01 |
| MATN2  | 5  | 0.00  | 0.03 | 9.94E-01 |
| MATN3  | 4  | -0.02 | 0.03 | 5.43E-01 |
| MAVS   | 3  | -0.05 | 0.12 | 6.49E-01 |
| MAX    | 5  | -0.07 | 0.10 | 5.03E-01 |
| MB     | 8  | 0.00  | 0.10 | 9.85E-01 |
| MCAM   | 8  | 0.06  | 0.05 | 2.36E-01 |
| MCFD2  | 4  | -0.12 | 0.08 | 1.70E-01 |
| MDGA1  | 6  | -0.01 | 0.01 | 5.46E-01 |
| MDK    | 11 | 0.02  | 0.07 | 7.31E-01 |
| MED18  | 1  | -0.76 | 0.24 | 1.72E-03 |
| MEGF10 | 13 | -0.03 | 0.03 | 3.71E-01 |
| MEGF9  | 11 | 0.10  | 0.05 | 3.04E-02 |
| MEP1B  | 15 | 0.02  | 0.01 | 1.25E-01 |
| MEPE   | 14 | -0.12 | 0.05 | 3.34E-02 |
| MERTK  | 13 | -0.03 | 0.05 | 4.94E-01 |
| MESD   | 4  | 0.09  | 0.11 | 4.28E-01 |
| MET    | 20 | -0.18 | 0.04 | 5.06E-07 |



|           |    |       |      |          |
|-----------|----|-------|------|----------|
| METAP1D   | 2  | -0.06 | 0.18 | 7.33E-01 |
| METAP2    | 4  | -0.04 | 0.10 | 6.51E-01 |
| MFAP5     | 5  | -0.34 | 0.12 | 4.19E-03 |
| MFGE8     | 11 | 0.00  | 0.03 | 9.19E-01 |
| MGLL      | 3  | -0.11 | 0.12 | 3.71E-01 |
| MGMT      | 3  | 0.01  | 0.04 | 6.93E-01 |
| MIA       | 7  | -0.05 | 0.03 | 4.49E-02 |
| MICB_MICA | 8  | -0.03 | 0.01 | 2.07E-02 |
| MIF       | 3  | -0.04 | 0.12 | 7.34E-01 |
| MILR1     | 9  | -0.02 | 0.05 | 6.00E-01 |
| MITD1     | 2  | 0.21  | 0.16 | 1.87E-01 |
| MLN       | 17 | 0.03  | 0.03 | 3.09E-01 |
| MME       | 13 | 0.01  | 0.03 | 7.50E-01 |
| MMP1      | 12 | 0.02  | 0.03 | 5.28E-01 |
| MMP10     | 2  | -0.17 | 0.05 | 2.68E-04 |
| MMP12     | 2  | -0.02 | 0.03 | 4.98E-01 |
| MMP13     | 1  | -0.12 | 0.14 | 3.67E-01 |
| MMP3      | 4  | 0.03  | 0.04 | 4.65E-01 |
| MMP7      | 5  | -0.01 | 0.06 | 8.77E-01 |
| MMP8      | 2  | -0.03 | 0.04 | 4.63E-01 |
| MMP9      | 9  | -0.14 | 0.06 | 2.57E-02 |
| MNDA      | 1  | -1.37 | 0.29 | 2.72E-06 |
| MOG       | 2  | 0.16  | 0.07 | 1.80E-02 |
| MPHOSPH8  | 2  | 0.08  | 0.15 | 6.09E-01 |
| MPI       | 4  | 0.06  | 0.06 | 3.35E-01 |
| MPIG6B    | 5  | 0.08  | 0.09 | 3.96E-01 |
| MPO       | 6  | -0.15 | 0.06 | 7.35E-03 |
| MSLN      | 8  | -0.07 | 0.03 | 3.81E-02 |
| MSMB      | 5  | -0.03 | 0.02 | 1.72E-01 |
| MSR1      | 12 | -0.02 | 0.04 | 5.71E-01 |
| MSRA      | 2  | 0.01  | 0.17 | 9.52E-01 |
| MSTN      | 5  | 0.08  | 0.11 | 4.53E-01 |
| MUC13     | 4  | -0.19 | 0.05 | 3.08E-05 |
| MUC16     | 3  | -0.07 | 0.08 | 3.41E-01 |
| MYO9B     | 1  | 0.64  | 0.48 | 1.82E-01 |
| MYOC      | 9  | 0.02  | 0.09 | 8.70E-01 |
| MZB1      | 7  | 0.05  | 0.07 | 5.25E-01 |
| MZT1      | 2  | 0.01  | 0.18 | 9.53E-01 |
| NAAA      | 15 | 0.00  | 0.02 | 9.30E-01 |
| NADK      | 5  | -0.01 | 0.05 | 8.86E-01 |
| NBL1      | 3  | -0.07 | 0.11 | 5.26E-01 |
| NBN       | 3  | 0.18  | 0.15 | 2.26E-01 |
| NCAM1     | 7  | 0.01  | 0.05 | 7.73E-01 |
| NCAM2     | 5  | 0.11  | 0.06 | 7.78E-02 |
| NCAN      | 11 | -0.02 | 0.06 | 7.93E-01 |
| NCF2      | 4  | -0.12 | 0.08 | 1.43E-01 |
| NCK2      | 1  | 0.54  | 0.43 | 2.13E-01 |
| NCR1      | 22 | -0.14 | 0.04 | 1.27E-04 |
| NCS1      | 8  | -0.07 | 0.09 | 3.97E-01 |
| NECTIN2   | 4  | 0.16  | 0.06 | 6.39E-03 |
| NECTIN4   | 6  | -0.01 | 0.06 | 8.23E-01 |
| NEFL      | 2  | -0.22 | 0.23 | 3.24E-01 |

|          |    |       |      |          |
|----------|----|-------|------|----------|
| NELL1    | 18 | 0.04  | 0.03 | 1.65E-01 |
| NELL2    | 14 | -0.22 | 0.06 | 1.31E-04 |
| NFASC    | 6  | 0.00  | 0.04 | 9.49E-01 |
| NFATC1   | 2  | -0.11 | 0.12 | 3.88E-01 |
| NFATC3   | 1  | 0.11  | 0.26 | 6.81E-01 |
| NFKBIE   | 2  | 0.09  | 0.09 | 3.23E-01 |
| NID1     | 10 | 0.00  | 0.05 | 9.99E-01 |
| NID2     | 15 | 0.07  | 0.03 | 9.79E-03 |
| NME3     | 12 | -0.10 | 0.04 | 1.96E-02 |
| NMNAT1   | 5  | 0.00  | 0.06 | 9.54E-01 |
| NOMO1    | 3  | -0.05 | 0.11 | 6.59E-01 |
| NOS1     | 2  | -0.08 | 0.14 | 5.74E-01 |
| NOS3     | 2  | -0.33 | 0.17 | 4.95E-02 |
| NOTCH1   | 6  | -0.04 | 0.05 | 4.45E-01 |
| NOTCH3   | 10 | -0.22 | 0.08 | 6.17E-03 |
| NPDC1    | 5  | -0.15 | 0.13 | 2.32E-01 |
| NPPB     | 2  | -0.07 | 0.08 | 3.37E-01 |
| NPPC     | 2  | 0.14  | 0.21 | 5.03E-01 |
| NPTX1    | 13 | -0.04 | 0.03 | 2.17E-01 |
| NPTXR    | 4  | -0.01 | 0.02 | 5.61E-01 |
| NPY      | 12 | -0.01 | 0.05 | 8.84E-01 |
| NRCAM    | 6  | -0.39 | 0.09 | 1.19E-05 |
| NRP1     | 6  | -0.07 | 0.04 | 1.20E-01 |
| NRP2     | 9  | 0.13  | 0.06 | 3.71E-02 |
| NRTN     | 1  | 0.15  | 0.28 | 6.02E-01 |
| NSFL1C   | 2  | 0.30  | 0.14 | 3.68E-02 |
| NT5C3A   | 4  | 0.17  | 0.10 | 1.03E-01 |
| NT5E     | 10 | -0.03 | 0.02 | 1.65E-01 |
| NTF3     | 4  | -0.03 | 0.07 | 6.71E-01 |
| NTF4     | 1  | -0.03 | 0.27 | 9.14E-01 |
| NTproBNP | 4  | -0.03 | 0.05 | 5.35E-01 |
| NTRK2    | 7  | 0.15  | 0.10 | 1.61E-01 |
| NTRK3    | 10 | -0.03 | 0.05 | 6.36E-01 |
| NUB1     | 4  | -0.14 | 0.07 | 5.23E-02 |
| NUCB2    | 5  | 0.03  | 0.04 | 3.44E-01 |
| NUDC     | 2  | 0.02  | 0.14 | 9.05E-01 |
| NUDT2    | 2  | 0.08  | 0.06 | 1.66E-01 |
| NUDT5    | 2  | 0.04  | 0.17 | 8.15E-01 |
| OBP2B    | 12 | 0.00  | 0.03 | 8.59E-01 |
| ODAM     | 2  | -0.06 | 0.06 | 3.40E-01 |
| OGFR     | 1  | -0.12 | 0.28 | 6.57E-01 |
| OGN      | 4  | 0.02  | 0.02 | 3.91E-01 |
| OLR1     | 6  | 0.04  | 0.08 | 6.14E-01 |
| OMD      | 6  | 0.04  | 0.07 | 6.00E-01 |
| OMG      | 7  | 0.03  | 0.09 | 7.30E-01 |
| OPTC     | 7  | 0.01  | 0.08 | 9.15E-01 |
| OSCAR    | 9  | 0.00  | 0.03 | 9.91E-01 |
| OSM      | 8  | -0.21 | 0.06 | 8.46E-04 |
| OSMR     | 5  | -0.01 | 0.03 | 7.50E-01 |
| OXT      | 9  | 0.08  | 0.04 | 2.52E-02 |
| P4HB     | 4  | 0.10  | 0.13 | 4.52E-01 |
| PADI2    | 1  | -0.05 | 0.12 | 6.63E-01 |

|          |    |       |      |          |
|----------|----|-------|------|----------|
| PADI4    | 1  | -0.05 | 0.05 | 3.87E-01 |
| PAEP     | 3  | -0.01 | 0.02 | 6.14E-01 |
| PAG1     | 6  | -0.08 | 0.09 | 3.31E-01 |
| PAK4     | 1  | 0.26  | 0.28 | 3.51E-01 |
| PAM      | 4  | 0.04  | 0.03 | 1.71E-01 |
| PAMR1    | 4  | 0.03  | 0.04 | 4.81E-01 |
| PAPPA    | 11 | 0.03  | 0.05 | 4.86E-01 |
| PARK7    | 5  | 0.03  | 0.10 | 7.87E-01 |
| PARP1    | 2  | -0.06 | 0.09 | 5.12E-01 |
| PBLD     | 1  | 0.02  | 0.03 | 4.92E-01 |
| PCDH1    | 6  | -0.04 | 0.09 | 6.46E-01 |
| PCDH17   | 8  | 0.00  | 0.03 | 9.97E-01 |
| PCOLCE   | 1  | 0.35  | 0.13 | 4.86E-03 |
| PCSK9    | 9  | 0.03  | 0.05 | 6.17E-01 |
| PDCD1    | 12 | 0.00  | 0.07 | 9.70E-01 |
| PDCD1LG2 | 8  | -0.03 | 0.02 | 1.32E-01 |
| PDCD5    | 2  | -0.10 | 0.06 | 7.74E-02 |
| PDCD6    | 4  | -0.03 | 0.02 | 6.77E-02 |
| PDGFA    | 17 | 0.04  | 0.04 | 3.71E-01 |
| PDGFB    | 17 | 0.04  | 0.04 | 3.34E-01 |
| PDGFC    | 7  | 0.01  | 0.05 | 8.73E-01 |
| PDGFRA   | 9  | 0.02  | 0.04 | 6.82E-01 |
| PDGFRB   | 2  | -0.02 | 0.01 | 1.56E-01 |
| PDLIM7   | 3  | 0.00  | 0.13 | 9.91E-01 |
| PEAR1    | 9  | 0.00  | 0.04 | 9.79E-01 |
| PEBP1    | 2  | -0.17 | 0.18 | 3.65E-01 |
| PECAM1   | 8  | -0.17 | 0.03 | 2.20E-09 |
| PFKFB2   | 4  | -0.06 | 0.07 | 3.49E-01 |
| PGF      | 3  | -0.03 | 0.13 | 8.28E-01 |
| PGLYRP1  | 12 | 0.01  | 0.04 | 7.97E-01 |
| PI3      | 4  | 0.02  | 0.05 | 6.99E-01 |
| PIGR     | 6  | 0.12  | 0.07 | 6.32E-02 |
| PIK3AP1  | 7  | 0.00  | 0.06 | 9.87E-01 |
| PIK3IP1  | 3  | -0.13 | 0.05 | 6.02E-03 |
| PILRA    | 6  | -0.01 | 0.02 | 6.38E-01 |
| PILRB    | 4  | -0.01 | 0.01 | 6.65E-01 |
| PKLR     | 4  | -0.29 | 0.07 | 8.11E-05 |
| PLA2G10  | 15 | 0.04  | 0.03 | 2.37E-01 |
| PLA2G15  | 9  | 0.00  | 0.04 | 9.38E-01 |
| PLA2G1B  | 18 | -0.09 | 0.05 | 6.47E-02 |
| PLA2G2A  | 6  | -0.07 | 0.02 | 3.51E-03 |
| PLA2G4A  | 3  | -0.06 | 0.15 | 6.71E-01 |
| PLA2G7   | 9  | -0.07 | 0.05 | 1.50E-01 |
| PLAT     | 4  | -0.36 | 0.11 | 1.49E-03 |
| PLAU     | 10 | -0.06 | 0.05 | 2.12E-01 |
| PLAUR    | 11 | 0.02  | 0.06 | 6.89E-01 |
| PLIN1    | 1  | 0.57  | 0.32 | 7.04E-02 |
| PLIN3    | 2  | 0.24  | 0.17 | 1.44E-01 |
| PLPBP    | 2  | 0.07  | 0.16 | 6.70E-01 |
| PLTP     | 11 | 0.00  | 0.03 | 8.77E-01 |
| PLXDC1   | 5  | -0.03 | 0.06 | 5.80E-01 |
| PLXNA4   | 5  | 0.09  | 0.08 | 2.86E-01 |

|          |    |       |      |          |
|----------|----|-------|------|----------|
| PLXNB2   | 11 | -0.01 | 0.02 | 6.37E-01 |
| PLXNB3   | 5  | 0.38  | 0.12 | 1.85E-03 |
| PM20D1   | 8  | -0.02 | 0.03 | 5.66E-01 |
| PMVK     | 6  | -0.11 | 0.10 | 2.77E-01 |
| PNLIPRP2 | 7  | -0.04 | 0.01 | 4.44E-04 |
| PNPT1    | 2  | 0.29  | 0.18 | 1.06E-01 |
| PODXL    | 6  | -0.14 | 0.03 | 6.56E-08 |
| PODXL2   | 12 | -0.02 | 0.06 | 8.00E-01 |
| POLR2F   | 1  | -0.49 | 0.27 | 6.81E-02 |
| PON2     | 3  | -0.04 | 0.03 | 1.61E-01 |
| PON3     | 9  | 0.07  | 0.04 | 5.49E-02 |
| PPCDC    | 2  | 0.06  | 0.04 | 1.45E-01 |
| PIIB     | 3  | 0.13  | 0.14 | 3.64E-01 |
| PPME1    | 1  | 0.06  | 0.27 | 8.33E-01 |
| PPP1R12A | 4  | 0.17  | 0.12 | 1.44E-01 |
| PPP1R2   | 3  | 0.15  | 0.14 | 2.82E-01 |
| PPP1R9B  | 2  | 0.03  | 0.17 | 8.67E-01 |
| PPP3R1   | 5  | -0.17 | 0.11 | 1.18E-01 |
| PPY      | 8  | -0.07 | 0.07 | 3.03E-01 |
| PRCP     | 12 | 0.06  | 0.05 | 2.17E-01 |
| PRDX1    | 2  | -0.07 | 0.19 | 7.05E-01 |
| PRDX3    | 1  | -0.31 | 0.23 | 1.71E-01 |
| PRDX5    | 2  | -0.22 | 0.16 | 1.54E-01 |
| PRDX6    | 1  | 0.00  | 0.11 | 9.65E-01 |
| PRELP    | 1  | 0.00  | 0.03 | 9.96E-01 |
| PRKAB1   | 2  | 0.07  | 0.23 | 7.69E-01 |
| PRKAR1A  | 5  | 0.02  | 0.08 | 8.37E-01 |
| PRKRA    | 1  | 0.13  | 0.14 | 3.51E-01 |
| PRL      | 3  | 0.22  | 0.13 | 1.03E-01 |
| PROC     | 8  | 0.02  | 0.05 | 6.78E-01 |
| PROK1    | 2  | 0.08  | 0.04 | 4.54E-02 |
| PRSS2    | 13 | -0.06 | 0.05 | 2.60E-01 |
| PRSS27   | 18 | -0.11 | 0.02 | 1.06E-07 |
| PRSS8    | 8  | 0.08  | 0.08 | 3.03E-01 |
| PRTFDC1  | 3  | 0.05  | 0.10 | 6.55E-01 |
| PRTG     | 9  | 0.04  | 0.03 | 2.21E-01 |
| PRTN3    | 14 | -0.05 | 0.04 | 2.27E-01 |
| PSG1     | 6  | -0.07 | 0.04 | 5.42E-02 |
| PSIP1    | 3  | 0.00  | 0.10 | 9.78E-01 |
| PSME1    | 3  | -0.10 | 0.14 | 4.63E-01 |
| PSME2    | 1  | -0.10 | 0.17 | 5.46E-01 |
| PSMG3    | 1  | -0.10 | 0.42 | 8.05E-01 |
| PSPN     | 9  | 0.09  | 0.10 | 3.91E-01 |
| PSRC1    | 2  | 0.01  | 0.09 | 9.17E-01 |
| PTGDS    | 2  | 0.21  | 0.20 | 2.79E-01 |
| PTN      | 4  | 0.08  | 0.08 | 3.19E-01 |
| PTPN1    | 3  | -0.14 | 0.12 | 2.39E-01 |
| PTPN6    | 2  | -0.03 | 0.15 | 8.59E-01 |
| PTPRF    | 14 | -0.01 | 0.05 | 8.35E-01 |
| PTPRM    | 8  | -0.14 | 0.02 | 5.67E-09 |
| PTPRN2   | 1  | 0.00  | 0.09 | 9.79E-01 |
| PTPRS    | 5  | 0.00  | 0.05 | 9.87E-01 |

|          |    |       |      |          |
|----------|----|-------|------|----------|
| PTS      | 4  | 0.00  | 0.09 | 9.78E-01 |
| PTX3     | 4  | 0.03  | 0.04 | 4.34E-01 |
| PVALB    | 8  | 0.00  | 0.02 | 9.31E-01 |
| PVR      | 2  | -0.01 | 0.02 | 5.60E-01 |
| PXN      | 3  | -0.01 | 0.02 | 5.84E-01 |
| QDPR     | 1  | 0.22  | 0.23 | 3.51E-01 |
| QPCT     | 11 | -0.02 | 0.04 | 6.32E-01 |
| RAB6A    | 3  | -0.02 | 0.04 | 5.37E-01 |
| RABEPK   | 1  | -0.13 | 0.10 | 1.85E-01 |
| RABGAP1L | 2  | 0.18  | 0.18 | 3.28E-01 |
| RAD23B   | 3  | 0.18  | 0.15 | 2.04E-01 |
| RARRES1  | 1  | 0.08  | 0.03 | 8.00E-03 |
| RARRES2  | 3  | 0.05  | 0.09 | 5.82E-01 |
| RASSF2   | 1  | -0.10 | 0.24 | 6.69E-01 |
| RBKS     | 1  | -0.06 | 0.07 | 3.91E-01 |
| RBP2     | 4  | 0.12  | 0.11 | 2.88E-01 |
| RBP5     | 3  | 0.06  | 0.05 | 1.94E-01 |
| RCOR1    | 1  | 0.34  | 0.24 | 1.58E-01 |
| REG1A    | 5  | 0.29  | 0.04 | 1.47E-14 |
| REG1B    | 7  | 0.23  | 0.03 | 8.86E-12 |
| REG3A    | 8  | 0.06  | 0.06 | 3.19E-01 |
| REG4     | 1  | 0.15  | 0.09 | 9.89E-02 |
| RELT     | 4  | 0.06  | 0.04 | 1.56E-01 |
| REN      | 2  | -0.19 | 0.12 | 1.03E-01 |
| RET      | 7  | 0.09  | 0.04 | 1.34E-02 |
| RETN     | 15 | 0.03  | 0.05 | 4.75E-01 |
| RGMA     | 17 | 0.02  | 0.04 | 6.17E-01 |
| RGMB     | 4  | -0.10 | 0.07 | 1.75E-01 |
| RGS8     | 1  | 0.02  | 0.10 | 8.54E-01 |
| RHOC     | 3  | -0.05 | 0.14 | 7.18E-01 |
| RILP     | 4  | 0.05  | 0.11 | 6.53E-01 |
| RNASE3   | 4  | 0.04  | 0.05 | 4.36E-01 |
| RNASET2  | 9  | 0.10  | 0.04 | 1.41E-02 |
| ROBO1    | 9  | -0.01 | 0.06 | 9.15E-01 |
| ROBO2    | 5  | 0.02  | 0.10 | 8.12E-01 |
| ROR1     | 12 | 0.00  | 0.04 | 9.10E-01 |
| RP2      | 2  | -0.02 | 0.17 | 9.04E-01 |
| RRM2     | 1  | 0.09  | 0.25 | 7.20E-01 |
| RRM2B    | 2  | 0.21  | 0.13 | 9.69E-02 |
| RSPO1    | 10 | 0.01  | 0.05 | 8.49E-01 |
| RSPO3    | 8  | -0.04 | 0.06 | 4.89E-01 |
| RTBDN    | 3  | -0.01 | 0.09 | 8.99E-01 |
| RTN4R    | 10 | -0.11 | 0.05 | 1.89E-02 |
| RWDD1    | 2  | 0.12  | 0.10 | 2.43E-01 |
| S100A11  | 2  | 0.01  | 0.07 | 9.19E-01 |
| S100A12  | 3  | -0.02 | 0.06 | 7.07E-01 |
| S100A16  | 3  | 0.28  | 0.11 | 1.10E-02 |
| S100A4   | 5  | 0.03  | 0.10 | 7.80E-01 |
| S100P    | 5  | -0.24 | 0.10 | 1.33E-02 |
| SAMD9L   | 2  | -0.01 | 0.05 | 8.19E-01 |
| SCAMP3   | 4  | -0.19 | 0.10 | 6.95E-02 |
| SCARA5   | 7  | 0.15  | 0.06 | 1.62E-02 |

|           |    |       |      |          |
|-----------|----|-------|------|----------|
| SCARB1    | 1  | -0.40 | 0.33 | 2.24E-01 |
| SCARB2    | 4  | 0.07  | 0.06 | 2.07E-01 |
| SCARF1    | 7  | 0.01  | 0.03 | 8.36E-01 |
| SCARF2    | 8  | -0.14 | 0.04 | 1.32E-03 |
| SCG2      | 4  | -0.82 | 0.12 | 3.08E-12 |
| SCG3      | 5  | -0.03 | 0.02 | 2.08E-01 |
| SCGB1A1   | 17 | 0.06  | 0.04 | 2.04E-01 |
| SCGB3A2   | 17 | 0.05  | 0.04 | 2.35E-01 |
| SCGN      | 5  | 0.35  | 0.07 | 4.55E-07 |
| SCLY      | 7  | 0.06  | 0.08 | 4.19E-01 |
| SCP2      | 1  | 0.49  | 0.29 | 9.58E-02 |
| SCRN1     | 2  | 0.10  | 0.11 | 3.69E-01 |
| SDC1      | 13 | 0.04  | 0.05 | 4.35E-01 |
| SDC4      | 20 | 0.04  | 0.04 | 2.60E-01 |
| SELE      | 9  | -0.10 | 0.02 | 1.92E-08 |
| SELP      | 10 | -0.09 | 0.04 | 2.71E-02 |
| SELPLG    | 10 | 0.02  | 0.03 | 4.56E-01 |
| SEMA3F    | 5  | -0.39 | 0.10 | 1.37E-04 |
| SEMA4C    | 4  | -0.41 | 0.06 | 7.00E-11 |
| SEMA4D    | 6  | -0.02 | 0.08 | 7.92E-01 |
| SEMA7A    | 18 | -0.04 | 0.04 | 4.02E-01 |
| SEPTIN9   | 2  | 0.35  | 0.18 | 5.47E-02 |
| SERPINA11 | 8  | -0.01 | 0.02 | 5.87E-01 |
| SERPINA12 | 5  | -0.01 | 0.02 | 6.90E-01 |
| SERPINA9  | 3  | 0.02  | 0.03 | 5.42E-01 |
| SERPINB1  | 3  | 0.03  | 0.12 | 8.30E-01 |
| SERPINB6  | 2  | 0.07  | 0.11 | 5.63E-01 |
| SERPINB8  | 2  | -0.02 | 0.02 | 4.73E-01 |
| SERPINB9  | 2  | -0.11 | 0.11 | 3.14E-01 |
| SERPINE1  | 17 | 0.03  | 0.04 | 5.11E-01 |
| SESTD1    | 3  | -0.01 | 0.11 | 9.40E-01 |
| SETMAR    | 1  | 0.05  | 0.09 | 5.40E-01 |
| SEZ6L     | 6  | 0.03  | 0.07 | 6.29E-01 |
| SEZ6L2    | 8  | 0.05  | 0.07 | 4.04E-01 |
| SF3B4     | 4  | -0.05 | 0.12 | 6.58E-01 |
| SFRP1     | 5  | 0.04  | 0.08 | 5.82E-01 |
| SFTPA1    | 1  | -0.31 | 0.09 | 3.05E-04 |
| SFTPA2    | 6  | 0.09  | 0.02 | 5.01E-05 |
| SFTPD     | 11 | -0.08 | 0.02 | 1.94E-06 |
| SH2B3     | 4  | 0.04  | 0.12 | 7.16E-01 |
| SH2D1A    | 2  | -0.06 | 0.12 | 6.04E-01 |
| SHMT1     | 4  | -0.03 | 0.03 | 2.54E-01 |
| SIAE      | 9  | 0.09  | 0.06 | 1.35E-01 |
| SIGLEC1   | 10 | -0.14 | 0.06 | 1.54E-02 |
| SIGLEC10  | 8  | 0.00  | 0.03 | 8.96E-01 |
| SIGLEC5   | 3  | 0.04  | 0.02 | 2.83E-02 |
| SIGLEC6   | 20 | 0.03  | 0.03 | 4.18E-01 |
| SIGLEC7   | 9  | 0.03  | 0.06 | 5.35E-01 |
| SIGLEC9   | 10 | -0.01 | 0.02 | 4.29E-01 |
| SIRPA     | 7  | 0.02  | 0.02 | 2.55E-01 |
| SIRPB1    | 11 | -0.02 | 0.02 | 2.64E-01 |
| SIRT2     | 3  | 0.06  | 0.11 | 5.97E-01 |

|          |    |       |      |          |
|----------|----|-------|------|----------|
| SIT1     | 6  | -0.13 | 0.08 | 1.26E-01 |
| SKAP1    | 8  | 0.00  | 0.09 | 9.73E-01 |
| SKAP2    | 3  | 0.16  | 0.15 | 2.72E-01 |
| SLAMF1   | 5  | -0.03 | 0.09 | 7.49E-01 |
| SLAMF6   | 3  | -0.19 | 0.10 | 5.66E-02 |
| SLAMF7   | 9  | 0.03  | 0.02 | 1.21E-01 |
| SLAMF8   | 5  | 0.00  | 0.02 | 9.34E-01 |
| SLC16A1  | 4  | -0.10 | 0.09 | 2.29E-01 |
| SLC27A4  | 3  | 0.00  | 0.11 | 9.69E-01 |
| SLC39A14 | 2  | -0.15 | 0.14 | 2.83E-01 |
| SLC39A5  | 8  | 0.02  | 0.08 | 8.17E-01 |
| SLIT2    | 1  | 0.50  | 0.33 | 1.30E-01 |
| SLITRK2  | 10 | 0.22  | 0.07 | 1.12E-03 |
| SLITRK6  | 8  | 0.00  | 0.04 | 9.50E-01 |
| SMAD1    | 5  | -0.02 | 0.11 | 8.86E-01 |
| SMAD5    | 1  | 0.12  | 0.08 | 1.35E-01 |
| SMOC1    | 10 | -0.03 | 0.04 | 4.71E-01 |
| SMOC2    | 5  | 0.02  | 0.04 | 5.62E-01 |
| SMPD1    | 15 | 0.00  | 0.03 | 9.94E-01 |
| SMPDL3A  | 20 | 0.02  | 0.02 | 2.98E-01 |
| SNAP23   | 3  | 0.10  | 0.11 | 3.50E-01 |
| SNAP29   | 5  | 0.16  | 0.10 | 1.12E-01 |
| SNCG     | 1  | -0.01 | 0.02 | 3.69E-01 |
| SNX9     | 2  | -0.26 | 0.14 | 5.57E-02 |
| SOD1     | 3  | 0.03  | 0.12 | 7.96E-01 |
| SOD2     | 7  | -0.16 | 0.06 | 5.40E-03 |
| SORCS2   | 4  | 0.01  | 0.04 | 7.98E-01 |
| SORD     | 4  | -0.10 | 0.10 | 2.98E-01 |
| SORT1    | 14 | 0.02  | 0.04 | 6.17E-01 |
| SOST     | 14 | 0.13  | 0.05 | 6.50E-03 |
| SPARC    | 14 | 0.03  | 0.05 | 5.42E-01 |
| SPARCL1  | 4  | 0.01  | 0.02 | 7.15E-01 |
| SPINK1   | 2  | 0.00  | 0.05 | 9.72E-01 |
| SPINK4   | 5  | 0.01  | 0.02 | 6.73E-01 |
| SPINK5   | 7  | -0.14 | 0.04 | 3.30E-04 |
| SPINK6   | 1  | -0.07 | 0.05 | 1.66E-01 |
| SPINT1   | 8  | -0.05 | 0.04 | 2.04E-01 |
| SPINT2   | 15 | 0.05  | 0.05 | 3.05E-01 |
| SPOCK1   | 12 | -0.02 | 0.06 | 7.51E-01 |
| SPON1    | 6  | 0.01  | 0.05 | 7.95E-01 |
| SPON2    | 1  | 0.01  | 0.07 | 9.18E-01 |
| SPP1     | 6  | -0.15 | 0.11 | 1.73E-01 |
| SPRY2    | 6  | 0.02  | 0.08 | 8.29E-01 |
| SRC      | 1  | 0.64  | 0.27 | 1.72E-02 |
| SRP14    | 2  | 0.01  | 0.12 | 9.09E-01 |
| SRPK2    | 3  | -0.07 | 0.11 | 5.13E-01 |
| SSC4D    | 10 | -0.01 | 0.04 | 7.41E-01 |
| SSC5D    | 10 | 0.12  | 0.06 | 3.90E-02 |
| ST3GAL1  | 7  | 0.04  | 0.05 | 4.06E-01 |
| ST6GAL1  | 7  | 0.00  | 0.08 | 9.85E-01 |
| STAMBP   | 2  | -0.18 | 0.18 | 3.17E-01 |
| STAT5B   | 3  | -0.06 | 0.14 | 6.90E-01 |

|         |    |       |      |          |
|---------|----|-------|------|----------|
| STC1    | 5  | -0.23 | 0.09 | 1.29E-02 |
| STC2    | 5  | -0.06 | 0.13 | 6.59E-01 |
| STIP1   | 2  | 0.08  | 0.15 | 6.11E-01 |
| STK11   | 4  | -0.07 | 0.12 | 5.53E-01 |
| STK24   | 2  | 0.07  | 0.19 | 7.25E-01 |
| STK4    | 4  | 0.03  | 0.12 | 8.05E-01 |
| STX16   | 1  | -0.24 | 0.27 | 3.72E-01 |
| STX4    | 2  | -0.60 | 0.22 | 6.18E-03 |
| STX6    | 2  | -0.22 | 0.21 | 2.81E-01 |
| STX8    | 3  | 0.09  | 0.13 | 4.84E-01 |
| SUGT1   | 1  | 0.21  | 0.22 | 3.51E-01 |
| SULT1A1 | 1  | -0.15 | 0.16 | 3.39E-01 |
| SULT2A1 | 4  | -0.08 | 0.05 | 1.18E-01 |
| SUMF2   | 13 | -0.04 | 0.04 | 2.52E-01 |
| SUSD1   | 4  | 0.00  | 0.09 | 9.71E-01 |
| SUSD2   | 4  | 0.06  | 0.03 | 7.14E-02 |
| TACC3   | 4  | 0.02  | 0.11 | 8.38E-01 |
| TACSTD2 | 13 | -0.05 | 0.02 | 5.60E-03 |
| TAFA5   | 2  | 0.01  | 0.09 | 9.33E-01 |
| TARBP2  | 3  | -0.12 | 0.13 | 3.92E-01 |
| TBC1D17 | 1  | 0.01  | 0.03 | 7.96E-01 |
| TBC1D23 | 4  | -0.07 | 0.08 | 4.03E-01 |
| TBC1D5  | 2  | -0.01 | 0.17 | 9.68E-01 |
| TBCB    | 4  | -0.16 | 0.12 | 1.97E-01 |
| TBCC    | 4  | -0.08 | 0.09 | 3.72E-01 |
| TBL1X   | 5  | -0.07 | 0.09 | 4.23E-01 |
| TCL1A   | 21 | -0.05 | 0.04 | 2.26E-01 |
| TCN2    | 2  | 0.01  | 0.03 | 7.66E-01 |
| TDGF1   | 1  | -2.13 | 0.34 | 2.07E-10 |
| TDRKH   | 4  | -0.06 | 0.04 | 1.41E-01 |
| TEK     | 9  | 0.03  | 0.03 | 3.08E-01 |
| TFF1    | 5  | -0.06 | 0.05 | 1.97E-01 |
| TFF2    | 8  | 0.03  | 0.06 | 6.52E-01 |
| TFF3    | 3  | -0.06 | 0.05 | 1.83E-01 |
| TFPI    | 6  | 0.00  | 0.04 | 9.47E-01 |
| TFPI2   | 9  | -0.07 | 0.06 | 2.69E-01 |
| TFRC    | 11 | -0.07 | 0.02 | 6.47E-03 |
| TGFA    | 4  | -0.27 | 0.09 | 2.43E-03 |
| TGFB1   | 10 | -0.04 | 0.05 | 4.34E-01 |
| TGFB1   | 8  | -0.02 | 0.02 | 4.74E-01 |
| TGFBR2  | 8  | -0.27 | 0.07 | 2.44E-04 |
| TGFBR3  | 7  | -0.03 | 0.06 | 6.18E-01 |
| TGM2    | 2  | 0.00  | 0.08 | 9.79E-01 |
| THBD    | 14 | 0.00  | 0.05 | 9.26E-01 |
| THBS2   | 7  | -0.06 | 0.03 | 7.84E-02 |
| THBS4   | 6  | 0.12  | 0.05 | 1.90E-02 |
| THOP1   | 1  | 0.01  | 0.09 | 9.53E-01 |
| THPO    | 17 | -0.04 | 0.05 | 3.54E-01 |
| THY1    | 3  | 0.02  | 0.04 | 6.65E-01 |
| TIA1    | 2  | 0.29  | 0.14 | 4.49E-02 |
| TIE1    | 12 | 0.03  | 0.03 | 3.21E-01 |
| TIGAR   | 2  | -0.11 | 0.19 | 5.68E-01 |



|           |    |       |      |          |
|-----------|----|-------|------|----------|
| TIMD4     | 24 | -0.04 | 0.03 | 1.99E-01 |
| TIMP1     | 5  | 0.21  | 0.08 | 9.33E-03 |
| TIMP3     | 17 | 0.03  | 0.02 | 2.40E-01 |
| TIMP4     | 4  | -0.16 | 0.04 | 1.05E-04 |
| TINAGL1   | 8  | -0.03 | 0.08 | 6.51E-01 |
| TJAP1     | 2  | 0.14  | 0.21 | 5.04E-01 |
| TLR3      | 6  | 0.00  | 0.01 | 7.41E-01 |
| TMPRSS15  | 7  | 0.03  | 0.05 | 4.95E-01 |
| TMPRSS5   | 18 | 0.04  | 0.02 | 3.36E-02 |
| TMSB10    | 6  | -0.14 | 0.09 | 1.23E-01 |
| TNC       | 15 | 0.02  | 0.03 | 4.77E-01 |
| TNF       | 2  | -0.09 | 0.08 | 2.92E-01 |
| TNFAIP8   | 1  | 0.18  | 0.19 | 3.49E-01 |
| TNFRSF10A | 4  | -0.05 | 0.03 | 1.01E-01 |
| TNFRSF10B | 3  | 0.04  | 0.05 | 3.57E-01 |
| TNFRSF10C | 16 | 0.00  | 0.02 | 8.10E-01 |
| TNFRSF11A | 6  | 0.08  | 0.04 | 2.95E-02 |
| TNFRSF11B | 9  | -0.02 | 0.06 | 7.62E-01 |
| TNFRSF12A | 2  | -0.32 | 0.18 | 7.75E-02 |
| TNFRSF13B | 10 | -0.09 | 0.06 | 1.22E-01 |
| TNFRSF13C | 12 | -0.01 | 0.08 | 8.98E-01 |
| TNFRSF14  | 5  | -0.06 | 0.09 | 5.14E-01 |
| TNFRSF19  | 4  | 0.03  | 0.05 | 5.47E-01 |
| TNFRSF1A  | 6  | 0.22  | 0.10 | 3.28E-02 |
| TNFRSF1B  | 6  | -0.17 | 0.07 | 1.63E-02 |
| TNFRSF21  | 11 | 0.05  | 0.06 | 3.70E-01 |
| TNFRSF4   | 6  | 0.01  | 0.08 | 9.43E-01 |
| TNFRSF6B  | 3  | -0.06 | 0.05 | 2.44E-01 |
| TNFRSF8   | 8  | -0.09 | 0.05 | 9.78E-02 |
| TNFRSF9   | 5  | 0.18  | 0.12 | 1.41E-01 |
| TNFSF10   | 12 | 0.01  | 0.03 | 8.30E-01 |
| TNFSF11   | 8  | 0.02  | 0.04 | 5.85E-01 |
| TNFSF12   | 16 | 0.05  | 0.04 | 2.02E-01 |
| TNFSF13   | 7  | -0.06 | 0.04 | 1.64E-01 |
| TNFSF13B  | 6  | 0.06  | 0.09 | 4.86E-01 |
| TNFSF14   | 5  | 0.07  | 0.05 | 1.32E-01 |
| TNR       | 16 | 0.06  | 0.03 | 5.97E-02 |
| TNXB      | 6  | 0.05  | 0.03 | 1.03E-01 |
| TP53      | 1  | 0.01  | 0.24 | 9.59E-01 |
| TP53INP1  | 3  | -0.03 | 0.12 | 7.71E-01 |
| TPMT      | 2  | -0.03 | 0.03 | 3.57E-01 |
| TPP1      | 11 | 0.07  | 0.06 | 2.23E-01 |
| TPPP3     | 1  | -0.21 | 0.22 | 3.48E-01 |
| TPSAB1    | 13 | -0.01 | 0.03 | 7.46E-01 |
| TRAF2     | 3  | 0.06  | 0.14 | 6.82E-01 |
| TREM2     | 7  | 0.06  | 0.03 | 4.61E-02 |
| TREML2    | 8  | -0.03 | 0.06 | 6.39E-01 |
| TRIAP1    | 5  | -0.08 | 0.09 | 3.41E-01 |
| TRIM21    | 2  | -0.55 | 0.21 | 1.05E-02 |
| TRIM5     | 1  | 0.00  | 0.05 | 9.36E-01 |
| TSHB      | 16 | 0.00  | 0.05 | 9.38E-01 |
| TSPAN1    | 3  | 0.03  | 0.20 | 8.67E-01 |

|         |    |       |      |          |
|---------|----|-------|------|----------|
| TST     | 1  | -0.03 | 0.20 | 8.94E-01 |
| TXLNA   | 3  | 0.02  | 0.11 | 8.86E-01 |
| TXNDC15 | 11 | 0.03  | 0.02 | 1.11E-01 |
| TXNDC5  | 4  | 0.09  | 0.10 | 3.50E-01 |
| TXNRD1  | 4  | 0.00  | 0.12 | 9.76E-01 |
| TYMP    | 2  | -0.07 | 0.07 | 3.55E-01 |
| TYRO3   | 8  | 0.03  | 0.02 | 1.81E-01 |
| UBAC1   | 1  | 0.08  | 0.32 | 8.00E-01 |
| ULBP2   | 7  | 0.04  | 0.03 | 1.39E-01 |
| UMOD    | 16 | -0.01 | 0.02 | 5.86E-01 |
| USO1    | 3  | -0.03 | 0.14 | 8.40E-01 |
| USP8    | 4  | 0.06  | 0.09 | 5.02E-01 |
| UXS1    | 7  | -0.05 | 0.05 | 3.27E-01 |
| VAMP5   | 2  | 0.76  | 0.15 | 5.60E-07 |
| VASH1   | 4  | 0.07  | 0.09 | 3.98E-01 |
| VASN    | 5  | -0.06 | 0.03 | 8.65E-02 |
| VAT1    | 9  | -0.02 | 0.06 | 7.58E-01 |
| VCAM1   | 10 | -0.14 | 0.06 | 1.67E-02 |
| VCAN    | 14 | 0.00  | 0.02 | 8.44E-01 |
| VEGFA   | 13 | 0.00  | 0.02 | 8.83E-01 |
| VEGFC   | 16 | 0.15  | 0.05 | 3.54E-03 |
| VEGFD   | 6  | -0.06 | 0.07 | 3.78E-01 |
| VMO1    | 7  | -0.03 | 0.02 | 1.52E-01 |
| VNN2    | 9  | 0.02  | 0.02 | 3.19E-01 |
| VPS37A  | 2  | -0.01 | 0.19 | 9.41E-01 |
| VPS53   | 2  | 0.00  | 0.18 | 9.78E-01 |
| VSIG4   | 8  | 0.19  | 0.10 | 5.09E-02 |
| VSIR    | 8  | 0.10  | 0.04 | 1.15E-02 |
| VSTM1   | 2  | 0.00  | 0.02 | 8.05E-01 |
| VSTM2L  | 2  | -0.13 | 0.09 | 1.39E-01 |
| VTA1    | 3  | 0.01  | 0.14 | 9.21E-01 |
| VTCN1   | 2  | -0.81 | 0.15 | 6.74E-08 |
| VWA1    | 7  | 0.03  | 0.06 | 6.59E-01 |
| VWC2    | 3  | 0.03  | 0.03 | 2.99E-01 |
| VWF     | 6  | 0.25  | 0.04 | 1.77E-08 |
| WARS    | 3  | -0.12 | 0.06 | 4.05E-02 |
| WAS     | 3  | -0.10 | 0.12 | 4.35E-01 |
| WASF1   | 3  | -0.03 | 0.05 | 5.43E-01 |
| WASF3   | 1  | 0.05  | 0.10 | 6.05E-01 |
| WFDC12  | 12 | 0.03  | 0.04 | 3.57E-01 |
| WFDC2   | 3  | -0.37 | 0.12 | 2.52E-03 |
| WFIKKN1 | 14 | -0.08 | 0.05 | 1.19E-01 |
| WFIKKN2 | 4  | 0.02  | 0.03 | 4.66E-01 |
| WIF1    | 12 | -0.09 | 0.05 | 4.48E-02 |
| WNT9A   | 1  | 0.19  | 0.20 | 3.32E-01 |
| WWP2    | 3  | -0.04 | 0.07 | 5.66E-01 |
| XCL1    | 10 | 0.00  | 0.02 | 9.26E-01 |
| XG      | 1  | 0.23  | 0.26 | 3.84E-01 |
| XPNPEP2 | 12 | 0.00  | 0.06 | 9.81E-01 |
| XRCC4   | 1  | 0.21  | 0.22 | 3.40E-01 |
| YES1    | 2  | 0.05  | 0.15 | 7.18E-01 |
| YTHDF3  | 1  | 0.16  | 0.17 | 3.51E-01 |

|        |   |       |      |          |
|--------|---|-------|------|----------|
| ZBTB16 | 7 | -0.05 | 0.07 | 4.68E-01 |
| ZBTB17 | 2 | -0.10 | 0.16 | 5.36E-01 |

---

**Supplementary Table 3. Associations of genetically predicted proteins with COVID-19 hospitalization using IVW method and cis+trans SNPs.**

| <b>Protein</b> | <b>No. of SNPs</b> | <b>Beta</b> | <b>SE</b> | <b>Pval</b> |
|----------------|--------------------|-------------|-----------|-------------|
| AARSD1         | 3                  | 0.00        | 0.07      | 9.83E-01    |
| ABHD14B        | 4                  | -0.04       | 0.04      | 2.41E-01    |
| ABL1           | 1                  | -0.03       | 0.12      | 8.04E-01    |
| ACAA1          | 3                  | 0.12        | 0.08      | 1.29E-01    |
| ACAN           | 15                 | -0.01       | 0.03      | 8.49E-01    |
| ACE2           | 9                  | -0.01       | 0.05      | 9.15E-01    |
| ACOX1          | 1                  | -0.07       | 0.14      | 5.87E-01    |
| ACP5           | 9                  | 0.02        | 0.03      | 4.21E-01    |
| ACP6           | 2                  | -0.01       | 0.01      | 4.02E-01    |
| ACTA2          | 1                  | 0.17        | 0.18      | 3.62E-01    |
| ACVRL1         | 3                  | 0.03        | 0.03      | 3.11E-01    |
| ACY1           | 3                  | -0.01       | 0.06      | 8.91E-01    |
| ADA            | 4                  | -0.01       | 0.02      | 4.45E-01    |
| ADA2           | 13                 | -0.05       | 0.03      | 1.16E-01    |
| ADAM15         | 8                  | 0.02        | 0.01      | 1.96E-01    |
| ADAM22         | 6                  | -0.02       | 0.02      | 3.02E-01    |
| ADAM23         | 5                  | 0.02        | 0.02      | 2.58E-01    |
| ADAM8          | 7                  | 0.04        | 0.02      | 4.95E-02    |
| ADAMTS13       | 11                 | 0.01        | 0.03      | 8.00E-01    |
| ADAMTS15       | 5                  | -0.05       | 0.06      | 3.68E-01    |
| ADAMTS16       | 1                  | -0.09       | 0.08      | 2.83E-01    |
| ADAMTS8        | 4                  | 0.01        | 0.02      | 7.19E-01    |
| ADGRB3         | 5                  | 0.02        | 0.01      | 1.21E-01    |
| ADGRE2         | 8                  | -0.02       | 0.03      | 4.42E-01    |
| ADGRE5         | 9                  | 0.02        | 0.03      | 5.35E-01    |
| ADGRG1         | 9                  | -0.21       | 0.05      | 3.04E-06    |
| ADGRG2         | 6                  | 0.47        | 0.07      | 1.91E-11    |
| ADH4           | 6                  | -0.05       | 0.05      | 3.13E-01    |
| ADM            | 1                  | 0.21        | 0.32      | 5.08E-01    |
| AFP            | 22                 | -0.03       | 0.02      | 1.39E-01    |
| AGER           | 15                 | 0.03        | 0.04      | 3.92E-01    |
| AGR2           | 4                  | 0.04        | 0.07      | 5.52E-01    |
| AGR3           | 3                  | 0.05        | 0.10      | 6.36E-01    |
| AGRN           | 6                  | 0.01        | 0.03      | 7.85E-01    |
| AGRP           | 8                  | 0.03        | 0.06      | 6.46E-01    |
| AGXT           | 11                 | -0.04       | 0.03      | 2.46E-01    |
| AHCY           | 1                  | -0.01       | 0.03      | 6.16E-01    |
| AHSP           | 7                  | 0.06        | 0.06      | 2.45E-01    |
| AIF1           | 1                  | 0.24        | 0.09      | 5.95E-03    |
| AIFM1          | 2                  | -0.04       | 0.13      | 7.67E-01    |
| AKR1B1         | 2                  | -0.08       | 0.07      | 2.45E-01    |
| AKR1C4         | 1                  | 0.06        | 0.19      | 7.52E-01    |
| AKT1S1         | 3                  | -0.07       | 0.09      | 4.48E-01    |
| AKT3           | 2                  | -0.20       | 0.14      | 1.53E-01    |
| ALCAM          | 11                 | 0.00        | 0.04      | 9.32E-01    |
| ALDH1A1        | 3                  | -0.11       | 0.09      | 2.21E-01    |
| ALDH3A1        | 1                  | -0.01       | 0.02      | 7.48E-01    |
| ALPP           | 10                 | 0.06        | 0.02      | 9.97E-03    |
| AMBP           | 9                  | -0.03       | 0.04      | 5.01E-01    |
| AMIGO2         | 11                 | -0.07       | 0.03      | 5.94E-03    |
| AMN            | 5                  | 0.00        | 0.01      | 9.88E-01    |
| AMY2A          | 8                  | -0.14       | 0.03      | 8.73E-08    |
| AMY2B          | 9                  | -0.11       | 0.02      | 3.03E-07    |
| ANG            | 3                  | 0.04        | 0.02      | 8.39E-02    |
| ANGPT1         | 17                 | 0.02        | 0.03      | 5.74E-01    |
| ANGPT2         | 6                  | 0.11        | 0.05      | 1.72E-02    |
| ANGPTL1        | 6                  | 0.01        | 0.03      | 6.87E-01    |
| ANGPTL2        | 5                  | 0.02        | 0.06      | 6.87E-01    |
| ANGPTL3        | 6                  | -0.08       | 0.06      | 2.05E-01    |

|          |    |       |      |          |
|----------|----|-------|------|----------|
| ANGPTL4  | 1  | -0.04 | 0.03 | 2.75E-01 |
| ANGPTL7  | 6  | 0.04  | 0.03 | 1.98E-01 |
| ANKRD54  | 1  | 0.00  | 0.17 | 9.82E-01 |
| ANPEP    | 7  | 0.06  | 0.02 | 1.25E-02 |
| ANXA11   | 3  | -0.23 | 0.11 | 3.66E-02 |
| ANXA3    | 5  | -0.09 | 0.07 | 2.17E-01 |
| ANXA4    | 2  | -0.08 | 0.11 | 4.62E-01 |
| ANXA5    | 1  | 0.28  | 0.09 | 1.51E-03 |
| AOC1     | 1  | -0.03 | 0.04 | 4.02E-01 |
| AOC3     | 10 | 0.02  | 0.02 | 3.05E-01 |
| APBB1IP  | 5  | 0.01  | 0.04 | 8.34E-01 |
| APEX1    | 3  | -0.01 | 0.03 | 7.88E-01 |
| APLP1    | 5  | -0.01 | 0.06 | 8.94E-01 |
| APOH     | 1  | 0.02  | 0.02 | 3.36E-01 |
| APOM     | 9  | 0.03  | 0.03 | 2.52E-01 |
| APP      | 17 | 0.04  | 0.03 | 2.46E-01 |
| APRT     | 6  | -0.11 | 0.06 | 7.30E-02 |
| AREG     | 3  | 0.21  | 0.05 | 9.95E-05 |
| ARG1     | 5  | -0.02 | 0.04 | 6.92E-01 |
| ARHGAP1  | 2  | -0.13 | 0.09 | 1.50E-01 |
| ARHGAP25 | 2  | 0.05  | 0.09 | 6.28E-01 |
| ARSA     | 7  | 0.01  | 0.01 | 4.89E-01 |
| ARSB     | 11 | 0.04  | 0.03 | 1.25E-01 |
| ART3     | 4  | 0.13  | 0.08 | 1.36E-01 |
| ARTN     | 1  | 0.15  | 0.21 | 4.79E-01 |
| ASAH2    | 16 | -0.01 | 0.02 | 5.90E-01 |
| ASGR1    | 6  | 0.01  | 0.04 | 8.88E-01 |
| ATG4A    | 3  | 0.12  | 0.10 | 2.40E-01 |
| ATOX1    | 4  | 0.08  | 0.08 | 3.05E-01 |
| ATP5IF1  | 6  | 0.06  | 0.06 | 3.39E-01 |
| ATP6V1F  | 1  | -0.04 | 0.15 | 8.04E-01 |
| ATXN10   | 5  | -0.02 | 0.06 | 7.49E-01 |
| AXIN1    | 3  | -0.05 | 0.11 | 6.03E-01 |
| AXL      | 8  | 0.01  | 0.04 | 7.62E-01 |
| AZU1     | 2  | -0.30 | 0.13 | 1.70E-02 |
| B4GALT1  | 7  | 0.05  | 0.03 | 4.58E-02 |
| B4GAT1   | 9  | -0.04 | 0.03 | 1.36E-01 |
| BACH1    | 3  | -0.04 | 0.11 | 6.97E-01 |
| BAG3     | 4  | -0.04 | 0.07 | 5.75E-01 |
| BAIAP2   | 5  | 0.01  | 0.07 | 9.37E-01 |
| BAMBI    | 1  | 0.04  | 0.15 | 8.04E-01 |
| BANK1    | 3  | -0.01 | 0.07 | 8.81E-01 |
| BAX      | 2  | -0.16 | 0.12 | 1.71E-01 |
| BCAM     | 14 | 0.02  | 0.02 | 4.59E-01 |
| BCAN     | 7  | 0.08  | 0.04 | 4.37E-02 |
| BCL2L11  | 10 | -0.03 | 0.02 | 1.61E-01 |
| BCR      | 1  | 0.14  | 0.21 | 5.06E-01 |
| BGN      | 11 | 0.03  | 0.04 | 3.99E-01 |
| BID      | 2  | 0.01  | 0.11 | 9.49E-01 |
| BIN2     | 3  | -0.04 | 0.08 | 6.03E-01 |
| BIRC2    | 4  | -0.08 | 0.10 | 4.14E-01 |
| BLMH     | 3  | 0.00  | 0.02 | 9.23E-01 |
| BLVRB    | 2  | 0.03  | 0.06 | 5.59E-01 |
| BMP4     | 5  | -0.01 | 0.07 | 9.16E-01 |
| BMP6     | 15 | -0.02 | 0.03 | 3.76E-01 |
| BOC      | 8  | 0.06  | 0.04 | 1.98E-01 |
| BPIFB1   | 15 | -0.02 | 0.02 | 3.20E-01 |
| BRK1     | 8  | 0.00  | 0.04 | 9.19E-01 |
| BSG      | 10 | -0.15 | 0.04 | 4.08E-04 |
| BST1     | 4  | 0.00  | 0.01 | 9.75E-01 |
| BST2     | 11 | 0.11  | 0.04 | 1.02E-02 |

|          |    |       |      |          |
|----------|----|-------|------|----------|
| BTC      | 3  | 0.01  | 0.02 | 5.97E-01 |
| BTN2A1   | 7  | 0.05  | 0.03 | 1.54E-01 |
| BTN3A2   | 3  | -0.02 | 0.02 | 1.32E-01 |
| C19orf12 | 5  | -0.06 | 0.07 | 3.74E-01 |
| C1QA     | 13 | 0.01  | 0.02 | 6.90E-01 |
| C1QTNF1  | 4  | 0.06  | 0.04 | 1.41E-01 |
| C2       | 2  | 0.01  | 0.10 | 9.11E-01 |
| C2CD2L   | 1  | 0.02  | 0.19 | 9.05E-01 |
| C4BPB    | 10 | -0.01 | 0.03 | 6.35E-01 |
| CA1      | 4  | 0.05  | 0.06 | 4.04E-01 |
| CA11     | 2  | -0.04 | 0.06 | 5.65E-01 |
| CA12     | 7  | 0.08  | 0.03 | 9.61E-03 |
| CA13     | 3  | -0.08 | 0.04 | 4.29E-02 |
| CA14     | 5  | 0.04  | 0.05 | 3.69E-01 |
| CA2      | 2  | -0.05 | 0.09 | 6.10E-01 |
| CA3      | 6  | 0.05  | 0.04 | 2.29E-01 |
| CA4      | 9  | 0.12  | 0.02 | 3.11E-07 |
| CA5A     | 5  | -0.03 | 0.02 | 3.18E-02 |
| CA6      | 12 | -0.02 | 0.01 | 1.21E-01 |
| CA9      | 5  | 0.07  | 0.05 | 1.88E-01 |
| CALB1    | 3  | -0.05 | 0.08 | 5.08E-01 |
| CALCA    | 7  | -0.02 | 0.06 | 7.67E-01 |
| CALCOCO1 | 4  | -0.09 | 0.07 | 1.93E-01 |
| CAMKK1   | 3  | 0.00  | 0.03 | 9.13E-01 |
| CANT1    | 7  | 0.05  | 0.05 | 2.84E-01 |
| CAPG     | 2  | 0.02  | 0.01 | 1.17E-01 |
| CARHSP1  | 1  | 0.13  | 0.12 | 2.84E-01 |
| CASP1    | 1  | 0.00  | 0.04 | 9.91E-01 |
| CASP10   | 3  | -0.08 | 0.05 | 1.30E-01 |
| CASP2    | 2  | -0.02 | 0.09 | 7.95E-01 |
| CASP3    | 2  | 0.08  | 0.08 | 3.44E-01 |
| CASP8    | 3  | -0.04 | 0.04 | 3.83E-01 |
| CBLIF    | 17 | -0.07 | 0.02 | 1.71E-04 |
| CBLN4    | 5  | 0.01  | 0.05 | 8.40E-01 |
| CC2D1A   | 2  | 0.12  | 0.12 | 3.35E-01 |
| CCDC80   | 5  | 0.18  | 0.05 | 3.04E-04 |
| CCL11    | 9  | -0.03 | 0.03 | 3.03E-01 |
| CCL13    | 14 | 0.01  | 0.03 | 6.67E-01 |
| CCL14    | 6  | 0.04  | 0.02 | 2.38E-02 |
| CCL15    | 4  | 0.25  | 0.05 | 1.54E-07 |
| CCL16    | 8  | 0.01  | 0.01 | 3.31E-01 |
| CCL17    | 14 | -0.01 | 0.02 | 6.24E-01 |
| CCL18    | 4  | 0.03  | 0.02 | 1.57E-01 |
| CCL19    | 5  | -0.03 | 0.06 | 6.53E-01 |
| CCL2     | 8  | 0.06  | 0.03 | 2.63E-02 |
| CCL20    | 5  | -0.16 | 0.06 | 8.00E-03 |
| CCL21    | 10 | -0.03 | 0.05 | 5.49E-01 |
| CCL22    | 8  | -0.10 | 0.05 | 2.83E-02 |
| CCL23    | 8  | -0.04 | 0.02 | 1.36E-01 |
| CCL24    | 11 | 0.01  | 0.01 | 3.96E-01 |
| CCL25    | 9  | 0.04  | 0.01 | 2.51E-03 |
| CCL26    | 7  | 0.01  | 0.03 | 7.41E-01 |
| CCL27    | 7  | -0.04 | 0.04 | 3.47E-01 |
| CCL28    | 18 | -0.09 | 0.03 | 1.58E-03 |
| CCL3     | 6  | 0.09  | 0.07 | 2.03E-01 |
| CCL4     | 5  | -0.10 | 0.03 | 5.25E-05 |
| CCL5     | 9  | -0.01 | 0.03 | 8.46E-01 |
| CCL7     | 4  | -0.04 | 0.03 | 1.83E-01 |
| CCL8     | 10 | 0.02  | 0.01 | 6.55E-02 |
| CCN1     | 11 | -0.02 | 0.04 | 5.70E-01 |
| CCN2     | 17 | 0.03  | 0.02 | 1.66E-01 |

|         |    |       |      |          |
|---------|----|-------|------|----------|
| CCN3    | 3  | -0.02 | 0.04 | 5.86E-01 |
| CCN4    | 12 | -0.03 | 0.02 | 2.12E-01 |
| CCN5    | 1  | 0.04  | 0.20 | 8.39E-01 |
| CCS     | 1  | 0.01  | 0.02 | 5.64E-01 |
| CD109   | 6  | -0.31 | 0.04 | 9.04E-13 |
| CD14    | 6  | -0.04 | 0.03 | 2.26E-01 |
| CD160   | 14 | -0.01 | 0.02 | 6.04E-01 |
| CD163   | 18 | -0.02 | 0.02 | 4.98E-01 |
| CD164   | 10 | -0.04 | 0.04 | 3.93E-01 |
| CD177   | 3  | 0.01  | 0.02 | 5.15E-01 |
| CD1C    | 18 | -0.05 | 0.03 | 7.13E-02 |
| CD200   | 8  | 0.02  | 0.04 | 6.32E-01 |
| CD200R1 | 9  | -0.01 | 0.01 | 2.32E-01 |
| CD207   | 15 | -0.02 | 0.02 | 1.90E-01 |
| CD209   | 8  | 0.10  | 0.01 | 1.52E-20 |
| CD22    | 21 | 0.01  | 0.03 | 8.39E-01 |
| CD244   | 14 | -0.05 | 0.03 | 4.65E-02 |
| CD27    | 6  | 0.00  | 0.03 | 9.77E-01 |
| CD274   | 7  | 0.02  | 0.03 | 4.35E-01 |
| CD276   | 7  | -0.01 | 0.01 | 4.91E-01 |
| CD28    | 10 | 0.03  | 0.03 | 3.81E-01 |
| CD2AP   | 1  | -0.04 | 0.15 | 8.04E-01 |
| CD300C  | 14 | 0.03  | 0.02 | 1.26E-01 |
| CD300E  | 10 | -0.02 | 0.03 | 4.20E-01 |
| CD300LF | 9  | 0.01  | 0.01 | 2.08E-01 |
| CD300LG | 12 | 0.01  | 0.02 | 5.52E-01 |
| CD302   | 7  | -0.01 | 0.03 | 6.69E-01 |
| CD33    | 7  | 0.02  | 0.01 | 4.25E-02 |
| CD34    | 3  | -0.19 | 0.02 | 2.28E-14 |
| CD38    | 2  | -0.03 | 0.03 | 3.35E-01 |
| CD4     | 4  | -0.04 | 0.03 | 1.33E-01 |
| CD40    | 9  | -0.02 | 0.02 | 4.91E-01 |
| CD40LG  | 12 | 0.11  | 0.04 | 4.05E-03 |
| CD46    | 7  | -0.20 | 0.06 | 3.18E-04 |
| CD48    | 13 | 0.00  | 0.01 | 7.97E-01 |
| CD5     | 8  | 0.01  | 0.04 | 8.40E-01 |
| CD55    | 6  | 0.02  | 0.02 | 2.74E-01 |
| CD58    | 12 | -0.13 | 0.02 | 3.22E-10 |
| CD59    | 5  | 0.03  | 0.04 | 4.43E-01 |
| CD6     | 11 | -0.02 | 0.01 | 2.54E-01 |
| CD63    | 10 | 0.01  | 0.04 | 8.76E-01 |
| CD69    | 6  | -0.05 | 0.05 | 3.34E-01 |
| CD70    | 3  | -0.01 | 0.01 | 4.86E-01 |
| CD74    | 6  | -0.03 | 0.04 | 4.16E-01 |
| CD79B   | 17 | -0.12 | 0.03 | 1.28E-05 |
| CD83    | 14 | -0.05 | 0.03 | 1.31E-01 |
| CD84    | 11 | 0.02  | 0.03 | 5.93E-01 |
| CD8A    | 5  | 0.02  | 0.03 | 5.21E-01 |
| CD93    | 5  | -0.08 | 0.07 | 2.59E-01 |
| CD99    | 4  | 0.13  | 0.07 | 5.71E-02 |
| CD99L2  | 9  | -0.01 | 0.04 | 7.98E-01 |
| CDC27   | 2  | 0.00  | 0.10 | 9.84E-01 |
| CDC37   | 2  | -0.03 | 0.11 | 7.79E-01 |
| CDCP1   | 8  | -0.04 | 0.03 | 2.18E-01 |
| CDH1    | 6  | 0.01  | 0.02 | 6.40E-01 |
| CDH15   | 4  | 0.16  | 0.03 | 9.08E-08 |
| CDH17   | 12 | -0.04 | 0.02 | 2.20E-02 |
| CDH2    | 13 | 0.04  | 0.04 | 3.66E-01 |
| CDH3    | 7  | -0.13 | 0.06 | 3.09E-02 |
| CDH5    | 12 | 0.03  | 0.01 | 6.51E-02 |
| CDH6    | 6  | 0.01  | 0.02 | 7.60E-01 |

|               |    |       |      |          |
|---------------|----|-------|------|----------|
| CDHR1         | 4  | 0.07  | 0.04 | 7.11E-02 |
| CDHR2         | 8  | 0.18  | 0.06 | 3.32E-03 |
| CDHR5         | 8  | -0.03 | 0.02 | 1.26E-01 |
| CDKN1A        | 5  | -0.01 | 0.05 | 7.90E-01 |
| CDKN2D        | 4  | 0.05  | 0.06 | 4.65E-01 |
| CDNF          | 1  | 0.00  | 0.03 | 9.23E-01 |
| CDON          | 4  | 0.09  | 0.07 | 1.80E-01 |
| CDSN          | 16 | -0.04 | 0.04 | 3.30E-01 |
| CEACAM1       | 6  | 0.00  | 0.03 | 8.79E-01 |
| CEACAM21      | 2  | -0.11 | 0.20 | 5.62E-01 |
| CEACAM3       | 1  | -0.11 | 0.18 | 5.48E-01 |
| CEACAM5       | 11 | -0.05 | 0.02 | 4.30E-03 |
| CEACAM8       | 12 | -0.01 | 0.03 | 8.03E-01 |
| CEBPB         | 3  | 0.19  | 0.11 | 8.04E-02 |
| CELA3A        | 15 | -0.04 | 0.02 | 7.07E-02 |
| CEP20         | 4  | 0.01  | 0.06 | 8.58E-01 |
| CEP43         | 6  | -0.09 | 0.07 | 1.81E-01 |
| CEP85         | 2  | -0.02 | 0.07 | 7.66E-01 |
| CERT          | 4  | -0.03 | 0.08 | 6.64E-01 |
| CES1          | 18 | 0.03  | 0.02 | 1.10E-01 |
| CES2          | 2  | 0.04  | 0.10 | 6.61E-01 |
| CES3          | 9  | -0.05 | 0.04 | 2.29E-01 |
| CETN2         | 3  | 0.00  | 0.08 | 9.63E-01 |
| CFC1          | 8  | 0.01  | 0.06 | 9.07E-01 |
| CGA           | 1  | -0.30 | 0.26 | 2.50E-01 |
| CGREF1        | 3  | 0.02  | 0.02 | 1.90E-01 |
| CHAC2         | 2  | 0.05  | 0.08 | 5.48E-01 |
| CHGB          | 6  | -0.04 | 0.02 | 2.22E-02 |
| CHI3L1        | 6  | 0.00  | 0.02 | 9.02E-01 |
| CHIT1         | 4  | -0.01 | 0.01 | 3.04E-01 |
| CHL1          | 6  | 0.01  | 0.03 | 7.33E-01 |
| CHMP1A        | 4  | 0.02  | 0.08 | 7.50E-01 |
| CHRDL1        | 4  | 0.00  | 0.10 | 9.96E-01 |
| CHRDL2        | 4  | 0.02  | 0.09 | 8.44E-01 |
| CIAPIN1       | 4  | -0.06 | 0.08 | 4.72E-01 |
| CKAP4         | 4  | 0.01  | 0.03 | 6.30E-01 |
| CKMT1A_CKMT1B | 6  | 0.22  | 0.06 | 1.18E-04 |
| CLC           | 9  | 0.02  | 0.04 | 5.45E-01 |
| CLEC10A       | 9  | 0.01  | 0.02 | 4.38E-01 |
| CLEC11A       | 7  | -0.06 | 0.03 | 7.21E-02 |
| CLEC14A       | 8  | -0.15 | 0.03 | 6.25E-07 |
| CLEC1A        | 7  | 0.04  | 0.02 | 5.21E-02 |
| CLEC1B        | 9  | 0.06  | 0.04 | 1.14E-01 |
| CLEC4A        | 12 | -0.01 | 0.02 | 6.04E-01 |
| CLEC4C        | 25 | 0.01  | 0.01 | 2.56E-01 |
| CLEC4D        | 10 | -0.01 | 0.02 | 6.53E-01 |
| CLEC4G        | 10 | 0.17  | 0.03 | 1.78E-11 |
| CLEC5A        | 10 | 0.05  | 0.03 | 9.00E-02 |
| CLEC6A        | 13 | 0.00  | 0.02 | 9.70E-01 |
| CLEC7A        | 3  | 0.01  | 0.01 | 2.05E-01 |
| CLIP2         | 2  | 0.02  | 0.07 | 7.35E-01 |
| CLMP          | 4  | 0.07  | 0.03 | 3.85E-02 |
| CLPS          | 7  | -0.03 | 0.02 | 2.00E-01 |
| CLSPN         | 1  | 0.01  | 0.10 | 8.84E-01 |
| CLSTN2        | 3  | 0.01  | 0.04 | 7.87E-01 |
| CLTA          | 1  | -0.07 | 0.08 | 4.21E-01 |
| CLUL1         | 9  | 0.00  | 0.02 | 8.64E-01 |
| CNDP1         | 8  | -0.05 | 0.02 | 3.59E-02 |
| CNPY2         | 1  | 0.07  | 0.08 | 4.31E-01 |
| CNPY4         | 3  | -0.08 | 0.05 | 1.16E-01 |
| CNST          | 4  | -0.06 | 0.09 | 5.24E-01 |



|         |    |       |      |          |
|---------|----|-------|------|----------|
| CNTN1   | 7  | 0.05  | 0.03 | 8.42E-02 |
| CNTN2   | 6  | 0.04  | 0.02 | 1.63E-02 |
| CNTN3   | 16 | -0.06 | 0.03 | 2.19E-02 |
| CNTN4   | 10 | 0.02  | 0.03 | 6.14E-01 |
| CNTN5   | 6  | 0.02  | 0.02 | 4.54E-01 |
| CNTNAP2 | 4  | 0.04  | 0.02 | 5.01E-02 |
| COL18A1 | 4  | -0.03 | 0.05 | 5.95E-01 |
| COL1A1  | 10 | -0.12 | 0.04 | 5.75E-03 |
| COL4A1  | 9  | -0.01 | 0.03 | 8.21E-01 |
| COL6A3  | 4  | 0.02  | 0.08 | 8.47E-01 |
| COL9A1  | 4  | 0.13  | 0.07 | 6.68E-02 |
| COLEC12 | 4  | 0.09  | 0.09 | 2.95E-01 |
| COMP    | 6  | 0.11  | 0.04 | 5.98E-03 |
| COMT    | 2  | -0.05 | 0.02 | 2.84E-02 |
| CORO1A  | 3  | 0.13  | 0.10 | 1.77E-01 |
| COX5B   | 4  | -0.13 | 0.08 | 1.29E-01 |
| CPA1    | 21 | -0.03 | 0.03 | 3.22E-01 |
| CPA2    | 4  | 0.02  | 0.03 | 4.13E-01 |
| CPB1    | 13 | -0.03 | 0.03 | 3.00E-01 |
| CPE     | 7  | -0.11 | 0.04 | 2.28E-03 |
| CPM     | 11 | -0.02 | 0.04 | 6.03E-01 |
| CPPED1  | 1  | -0.02 | 0.02 | 2.47E-01 |
| CPVL    | 12 | 0.00  | 0.01 | 8.88E-01 |
| CPXM1   | 18 | -0.01 | 0.02 | 6.36E-01 |
| CR2     | 23 | 0.00  | 0.03 | 9.72E-01 |
| CRACR2A | 4  | -0.03 | 0.06 | 6.75E-01 |
| CRADD   | 4  | -0.05 | 0.08 | 5.54E-01 |
| CREG1   | 11 | 0.04  | 0.04 | 2.82E-01 |
| CRELD2  | 11 | -0.01 | 0.03 | 6.06E-01 |
| CRH     | 23 | 0.01  | 0.02 | 6.42E-01 |
| CRHBP   | 5  | -0.01 | 0.02 | 7.28E-01 |
| CRIM1   | 4  | -0.18 | 0.08 | 2.67E-02 |
| CRIP2   | 4  | 0.20  | 0.06 | 1.07E-03 |
| CRISP2  | 13 | 0.00  | 0.02 | 8.26E-01 |
| CRKL    | 1  | -0.03 | 0.15 | 8.35E-01 |
| CRLF1   | 7  | -0.04 | 0.07 | 5.67E-01 |
| CRNN    | 3  | 0.03  | 0.01 | 3.01E-02 |
| CRTAC1  | 2  | 0.01  | 0.01 | 5.87E-01 |
| CRTAM   | 14 | -0.01 | 0.03 | 6.48E-01 |
| CSF1    | 3  | -0.07 | 0.05 | 1.47E-01 |
| CSF2RA  | 1  | 0.13  | 0.19 | 4.88E-01 |
| CSF3    | 3  | 0.05  | 0.06 | 4.24E-01 |
| CST3    | 6  | -0.02 | 0.04 | 6.20E-01 |
| CST5    | 13 | -0.01 | 0.01 | 6.61E-01 |
| CST6    | 15 | 0.04  | 0.03 | 1.50E-01 |
| CST7    | 11 | 0.00  | 0.01 | 7.73E-01 |
| CTF1    | 2  | 0.00  | 0.14 | 9.93E-01 |
| CTRB1   | 12 | -0.02 | 0.02 | 1.95E-01 |
| CTRC    | 11 | 0.00  | 0.02 | 8.30E-01 |
| CTSB    | 7  | 0.06  | 0.02 | 3.59E-03 |
| CTSC    | 7  | 0.03  | 0.02 | 4.74E-02 |
| CTSD    | 6  | 0.06  | 0.03 | 2.15E-02 |
| CTSF    | 15 | 0.00  | 0.02 | 9.19E-01 |
| CTSH    | 1  | 0.00  | 0.11 | 9.71E-01 |
| CTSL    | 17 | 0.00  | 0.03 | 8.85E-01 |
| CTSO    | 10 | 0.01  | 0.03 | 7.25E-01 |
| CTSS    | 7  | -0.26 | 0.05 | 2.40E-06 |
| CTSV    | 17 | -0.05 | 0.03 | 1.19E-01 |
| CTSZ    | 9  | 0.00  | 0.02 | 9.01E-01 |
| CX3CL1  | 7  | -0.42 | 0.06 | 8.37E-13 |
| CXADR   | 5  | 0.17  | 0.04 | 1.75E-05 |

|               |    |       |      |          |
|---------------|----|-------|------|----------|
| CXCL1         | 4  | 0.03  | 0.02 | 1.19E-01 |
| CXCL10        | 4  | 0.04  | 0.03 | 2.54E-01 |
| CXCL11        | 8  | -0.05 | 0.04 | 2.23E-01 |
| CXCL12        | 9  | -0.05 | 0.04 | 2.08E-01 |
| CXCL13        | 8  | -0.16 | 0.07 | 1.32E-02 |
| CXCL14        | 2  | 0.15  | 0.11 | 1.91E-01 |
| CXCL16        | 13 | 0.02  | 0.03 | 5.63E-01 |
| CXCL17        | 5  | -0.30 | 0.08 | 1.40E-04 |
| CXCL3         | 3  | 0.02  | 0.08 | 7.83E-01 |
| CXCL5         | 11 | 0.01  | 0.02 | 7.71E-01 |
| CXCL6         | 7  | -0.01 | 0.02 | 6.59E-01 |
| CXCL8         | 8  | 0.06  | 0.04 | 1.35E-01 |
| CXCL9         | 5  | 0.01  | 0.05 | 7.74E-01 |
| DAB2          | 3  | -0.15 | 0.10 | 1.22E-01 |
| DAG1          | 3  | 0.03  | 0.11 | 7.83E-01 |
| DAPP1         | 2  | 0.01  | 0.08 | 9.00E-01 |
| DARS1         | 5  | 0.00  | 0.07 | 9.52E-01 |
| DBI           | 3  | 0.05  | 0.04 | 1.87E-01 |
| DBNL          | 4  | 0.04  | 0.09 | 6.67E-01 |
| DCBLD2        | 16 | -0.01 | 0.03 | 8.54E-01 |
| DCN           | 1  | 0.02  | 0.16 | 9.22E-01 |
| DCTN1         | 1  | 0.09  | 0.15 | 5.61E-01 |
| DCTN2         | 2  | -0.04 | 0.14 | 7.69E-01 |
| DCTPP1        | 5  | 0.03  | 0.06 | 5.88E-01 |
| DCXR          | 6  | -0.02 | 0.06 | 7.10E-01 |
| DDAH1         | 5  | 0.10  | 0.05 | 4.40E-02 |
| DDC           | 7  | -0.01 | 0.02 | 6.16E-01 |
| DDR1          | 12 | -0.01 | 0.02 | 6.21E-01 |
| DDX58         | 1  | -0.01 | 0.04 | 7.57E-01 |
| DECR1         | 3  | -0.02 | 0.09 | 8.14E-01 |
| DEFA1_DEFA1B  | 15 | 0.02  | 0.04 | 6.30E-01 |
| DEFB4A_DEFB4B | 3  | -0.10 | 0.09 | 2.88E-01 |
| DFFA          | 1  | -0.04 | 0.15 | 8.04E-01 |
| DIABLO        | 3  | -0.11 | 0.11 | 2.95E-01 |
| DKK1          | 10 | 0.02  | 0.03 | 5.71E-01 |
| DKK3          | 7  | -0.03 | 0.03 | 1.85E-01 |
| DKK4          | 6  | 0.03  | 0.03 | 4.02E-01 |
| DKKL1         | 5  | 0.00  | 0.01 | 9.52E-01 |
| DLK1          | 6  | -0.01 | 0.02 | 5.32E-01 |
| DLL1          | 6  | 0.00  | 0.04 | 9.24E-01 |
| DNAJA2        | 1  | -0.02 | 0.16 | 8.79E-01 |
| DNAJB1        | 6  | -0.03 | 0.06 | 6.37E-01 |
| DNAJB8        | 2  | 0.05  | 0.11 | 6.83E-01 |
| DNER          | 7  | 0.08  | 0.03 | 2.62E-02 |
| DNMBP         | 3  | -0.01 | 0.08 | 8.57E-01 |
| DNPH1         | 1  | -0.08 | 0.04 | 2.94E-02 |
| DOK2          | 4  | -0.06 | 0.08 | 4.20E-01 |
| DPEP1         | 7  | -0.02 | 0.01 | 3.07E-01 |
| DPEP2         | 3  | 0.02  | 0.05 | 7.27E-01 |
| DPP10         | 5  | -0.07 | 0.03 | 1.98E-02 |
| DPP4          | 5  | 0.01  | 0.04 | 8.66E-01 |
| DPP6          | 7  | -0.12 | 0.03 | 3.45E-04 |
| DPP7          | 7  | 0.01  | 0.04 | 7.94E-01 |
| DPT           | 2  | -0.02 | 0.03 | 4.93E-01 |
| DPY30         | 2  | -0.10 | 0.13 | 4.35E-01 |
| DRAXIN        | 17 | -0.07 | 0.03 | 1.23E-02 |
| DRG2          | 3  | 0.09  | 0.07 | 1.86E-01 |
| DSC2          | 9  | 0.01  | 0.03 | 6.80E-01 |
| DSG2          | 10 | 0.03  | 0.03 | 2.44E-01 |
| DSG3          | 17 | 0.05  | 0.03 | 3.44E-02 |
| DSG4          | 22 | -0.05 | 0.03 | 9.54E-02 |

|           |    |       |      |          |
|-----------|----|-------|------|----------|
| DTX3      | 3  | -0.12 | 0.05 | 1.65E-02 |
| DUSP3     | 1  | -0.14 | 0.15 | 3.69E-01 |
| EBAG9     | 5  | 0.05  | 0.07 | 4.56E-01 |
| EBI3_IL27 | 19 | -0.03 | 0.03 | 2.68E-01 |
| ECE1      | 4  | 0.01  | 0.06 | 8.35E-01 |
| EDA2R     | 3  | 0.16  | 0.12 | 2.09E-01 |
| EDAR      | 23 | 0.01  | 0.02 | 4.93E-01 |
| EDIL3     | 3  | 0.06  | 0.06 | 3.24E-01 |
| EFEMP1    | 4  | 0.03  | 0.05 | 4.81E-01 |
| EFNA1     | 4  | 0.13  | 0.03 | 3.89E-06 |
| EFNA4     | 5  | -0.01 | 0.07 | 8.90E-01 |
| EGF       | 11 | 0.05  | 0.04 | 2.18E-01 |
| EGFL7     | 18 | 0.00  | 0.03 | 9.91E-01 |
| EGFR      | 6  | -0.05 | 0.06 | 3.72E-01 |
| EGLN1     | 4  | -0.07 | 0.06 | 2.46E-01 |
| EIF4B     | 3  | -0.06 | 0.08 | 4.89E-01 |
| EIF4G1    | 3  | -0.03 | 0.08 | 7.24E-01 |
| ELOA      | 2  | 0.04  | 0.07 | 5.84E-01 |
| ENAH      | 1  | 0.03  | 0.10 | 7.43E-01 |
| ENG       | 8  | -0.12 | 0.02 | 4.58E-11 |
| ENO1      | 4  | 0.13  | 0.07 | 4.69E-02 |
| ENO2      | 5  | -0.01 | 0.05 | 8.31E-01 |
| ENPP2     | 8  | -0.07 | 0.04 | 5.87E-02 |
| ENPP5     | 7  | 0.00  | 0.01 | 8.02E-01 |
| ENPP7     | 6  | -0.01 | 0.01 | 6.88E-01 |
| ENTPD2    | 2  | 0.21  | 0.16 | 1.86E-01 |
| ENTPD5    | 9  | -0.02 | 0.02 | 2.16E-01 |
| ENTPD6    | 7  | 0.04  | 0.02 | 1.53E-02 |
| EPCAM     | 14 | 0.08  | 0.02 | 9.68E-04 |
| EPHA1     | 7  | -0.05 | 0.04 | 2.53E-01 |
| EPHA2     | 6  | 0.18  | 0.06 | 1.56E-03 |
| EPHB4     | 10 | -0.13 | 0.03 | 4.98E-07 |
| EPHB6     | 4  | 0.01  | 0.04 | 8.04E-01 |
| EPO       | 9  | 0.04  | 0.04 | 2.47E-01 |
| EPS8L2    | 3  | 0.02  | 0.03 | 5.16E-01 |
| ERBB2     | 9  | 0.03  | 0.04 | 4.40E-01 |
| ERBB3     | 9  | 0.02  | 0.03 | 6.33E-01 |
| ERBB4     | 16 | -0.16 | 0.03 | 2.16E-07 |
| ERBIN     | 3  | 0.07  | 0.11 | 4.79E-01 |
| EREG      | 10 | 0.01  | 0.05 | 8.59E-01 |
| ERP44     | 6  | 0.00  | 0.02 | 9.92E-01 |
| ESAM      | 8  | 0.07  | 0.04 | 8.24E-02 |
| ESM1      | 11 | -0.06 | 0.04 | 1.34E-01 |
| EZR       | 2  | -0.03 | 0.12 | 8.29E-01 |
| F11R      | 11 | 0.06  | 0.05 | 2.54E-01 |
| F2R       | 7  | -0.09 | 0.04 | 4.75E-02 |
| F3        | 9  | 0.00  | 0.02 | 8.31E-01 |
| F7        | 7  | 0.02  | 0.02 | 2.40E-01 |
| F9        | 2  | 0.07  | 0.08 | 3.71E-01 |
| FABP1     | 2  | -0.01 | 0.04 | 7.23E-01 |
| FABP2     | 5  | 0.11  | 0.05 | 1.51E-02 |
| FABP4     | 2  | 0.12  | 0.09 | 2.15E-01 |
| FABP5     | 2  | 0.09  | 0.11 | 4.21E-01 |
| FABP6     | 4  | -0.02 | 0.04 | 5.82E-01 |
| FABP9     | 16 | 0.03  | 0.02 | 1.46E-01 |
| FADD      | 3  | -0.02 | 0.09 | 8.73E-01 |
| FAM3B     | 6  | -0.03 | 0.02 | 8.34E-02 |
| FAM3C     | 2  | -0.06 | 0.10 | 5.64E-01 |
| FAP       | 7  | -0.01 | 0.03 | 8.82E-01 |
| FAS       | 4  | -0.04 | 0.04 | 2.48E-01 |
| FASLG     | 21 | 0.00  | 0.02 | 9.05E-01 |

|           |    |       |      |          |
|-----------|----|-------|------|----------|
| FBP1      | 5  | 0.01  | 0.04 | 7.55E-01 |
| FCAR      | 14 | -0.04 | 0.01 | 5.22E-03 |
| FCER2     | 14 | 0.00  | 0.03 | 8.64E-01 |
| FCGR2A    | 5  | -0.01 | 0.01 | 4.55E-01 |
| FCGR2B    | 4  | -0.06 | 0.02 | 1.42E-03 |
| FCGR3B    | 11 | -0.02 | 0.03 | 5.40E-01 |
| FCN2      | 11 | -0.03 | 0.01 | 3.07E-02 |
| FCRL1     | 26 | -0.05 | 0.02 | 9.49E-03 |
| FCRL2     | 16 | 0.02  | 0.02 | 1.73E-01 |
| FCRL3     | 5  | -0.03 | 0.01 | 9.45E-03 |
| FCRL5     | 9  | 0.02  | 0.04 | 6.14E-01 |
| FCRL6     | 5  | -0.02 | 0.01 | 2.21E-01 |
| FCRLB     | 7  | -0.01 | 0.02 | 4.65E-01 |
| FEN1      | 1  | 0.04  | 0.19 | 8.31E-01 |
| FES       | 1  | 0.03  | 0.07 | 6.27E-01 |
| FETUB     | 4  | -0.02 | 0.03 | 5.67E-01 |
| FGF19     | 5  | 0.18  | 0.03 | 1.01E-07 |
| FGF2      | 6  | -0.01 | 0.01 | 4.90E-01 |
| FGF21     | 7  | -0.01 | 0.04 | 8.03E-01 |
| FGF23     | 5  | -0.09 | 0.06 | 1.29E-01 |
| FGF5      | 2  | -0.02 | 0.02 | 3.89E-01 |
| FGFBP1    | 13 | 0.00  | 0.04 | 9.83E-01 |
| FGFR2     | 8  | 0.21  | 0.06 | 2.28E-04 |
| FGR       | 1  | -0.14 | 0.13 | 2.83E-01 |
| FHIT      | 2  | -0.05 | 0.10 | 5.80E-01 |
| FIS1      | 4  | -0.07 | 0.05 | 1.75E-01 |
| FKBP1B    | 4  | 0.08  | 0.04 | 5.34E-02 |
| FKBP4     | 5  | -0.01 | 0.07 | 9.09E-01 |
| FKBP5     | 5  | -0.01 | 0.04 | 8.49E-01 |
| FLI1      | 3  | -0.13 | 0.09 | 1.65E-01 |
| FLRT2     | 11 | -0.01 | 0.02 | 7.20E-01 |
| FLT1      | 8  | -0.05 | 0.03 | 4.67E-02 |
| FLT3      | 6  | -0.04 | 0.06 | 5.58E-01 |
| FLT3LG    | 20 | -0.02 | 0.02 | 5.14E-01 |
| FLT4      | 11 | -0.03 | 0.01 | 4.91E-03 |
| FOLR1     | 8  | -0.03 | 0.05 | 4.79E-01 |
| FOLR2     | 14 | -0.01 | 0.03 | 6.52E-01 |
| FOLR3     | 10 | -0.03 | 0.05 | 4.80E-01 |
| FOXO1     | 4  | 0.03  | 0.06 | 5.67E-01 |
| FOXO3     | 1  | 0.05  | 0.26 | 8.46E-01 |
| FRZB      | 4  | -0.01 | 0.02 | 5.66E-01 |
| FST       | 3  | -0.01 | 0.05 | 7.99E-01 |
| FSTL3     | 2  | 0.01  | 0.10 | 9.19E-01 |
| FUCA1     | 5  | -0.01 | 0.01 | 3.18E-01 |
| FURIN     | 3  | -0.04 | 0.05 | 3.27E-01 |
| FUS       | 2  | 0.00  | 0.10 | 9.69E-01 |
| FUT3_FUT5 | 14 | -0.02 | 0.02 | 1.37E-01 |
| FUT8      | 12 | 0.01  | 0.01 | 4.41E-01 |
| FXN       | 3  | -0.08 | 0.10 | 4.41E-01 |
| FXYS5     | 2  | -0.06 | 0.10 | 5.26E-01 |
| FYB1      | 2  | 0.00  | 0.11 | 9.86E-01 |
| GAL       | 21 | 0.01  | 0.03 | 6.56E-01 |
| GALNT10   | 9  | 0.00  | 0.03 | 8.74E-01 |
| GALNT2    | 7  | 0.01  | 0.03 | 6.79E-01 |
| GALNT3    | 8  | 0.01  | 0.02 | 6.21E-01 |
| GALNT7    | 6  | -0.02 | 0.03 | 5.22E-01 |
| GAS6      | 15 | -0.01 | 0.02 | 6.60E-01 |
| GBP2      | 1  | 0.02  | 0.09 | 8.38E-01 |
| GBP4      | 1  | 0.00  | 0.01 | 8.49E-01 |
| GCG       | 5  | 0.02  | 0.08 | 8.16E-01 |
| GCNT1     | 7  | 0.03  | 0.02 | 2.11E-01 |

|         |    |       |      |          |
|---------|----|-------|------|----------|
| GDF15   | 1  | 0.07  | 0.04 | 4.92E-02 |
| GDF2    | 14 | 0.06  | 0.03 | 6.60E-02 |
| GDNF    | 1  | -0.02 | 0.04 | 6.35E-01 |
| GFAP    | 8  | -0.06 | 0.06 | 3.03E-01 |
| GFER    | 1  | -0.07 | 0.15 | 6.33E-01 |
| GFRA1   | 4  | 0.09  | 0.04 | 1.29E-02 |
| GFRA2   | 7  | 0.05  | 0.03 | 8.18E-02 |
| GFRA3   | 21 | -0.02 | 0.03 | 5.71E-01 |
| GGH     | 9  | -0.01 | 0.02 | 5.62E-01 |
| GGT1    | 7  | -0.02 | 0.04 | 5.39E-01 |
| GGT5    | 4  | -0.01 | 0.04 | 6.95E-01 |
| GHRL    | 10 | 0.03  | 0.04 | 3.73E-01 |
| GKN1    | 4  | 0.25  | 0.08 | 1.09E-03 |
| GLB1    | 9  | 0.04  | 0.03 | 1.40E-01 |
| GLO1    | 1  | -0.03 | 0.03 | 3.20E-01 |
| GLOD4   | 2  | -0.04 | 0.13 | 7.46E-01 |
| GLRX    | 2  | -0.01 | 0.02 | 7.12E-01 |
| GLT8D2  | 1  | 0.01  | 0.06 | 8.77E-01 |
| GMPR    | 2  | -0.03 | 0.04 | 5.01E-01 |
| GNE     | 3  | -0.07 | 0.07 | 2.75E-01 |
| GNLY    | 12 | 0.00  | 0.02 | 9.81E-01 |
| GOLM2   | 9  | 0.19  | 0.03 | 1.25E-12 |
| GOPC    | 2  | -0.03 | 0.11 | 7.47E-01 |
| GP1BA   | 16 | -0.01 | 0.03 | 8.45E-01 |
| GP2     | 8  | 0.11  | 0.02 | 1.60E-12 |
| GP6     | 6  | 0.01  | 0.03 | 7.74E-01 |
| GPA33   | 13 | 0.06  | 0.02 | 4.68E-03 |
| GPC1    | 17 | -0.06 | 0.02 | 1.98E-02 |
| GPC5    | 10 | -0.01 | 0.01 | 5.03E-01 |
| GPNMB   | 6  | -0.03 | 0.03 | 1.97E-01 |
| GPR37   | 10 | 0.00  | 0.01 | 9.39E-01 |
| GRAP2   | 3  | -0.06 | 0.10 | 5.18E-01 |
| GRK5    | 1  | -0.03 | 0.04 | 4.59E-01 |
| GRN     | 12 | -0.02 | 0.01 | 1.01E-01 |
| GRPEL1  | 3  | 0.12  | 0.08 | 1.56E-01 |
| GSAP    | 1  | -0.06 | 0.15 | 7.14E-01 |
| GSTA1   | 9  | 0.00  | 0.03 | 9.58E-01 |
| GSTA3   | 5  | 0.01  | 0.03 | 8.07E-01 |
| GSTP1   | 1  | 0.00  | 0.05 | 9.81E-01 |
| GUCA2A  | 7  | -0.05 | 0.05 | 3.63E-01 |
| GUSB    | 12 | 0.00  | 0.03 | 9.82E-01 |
| GYS1    | 3  | 0.03  | 0.04 | 4.10E-01 |
| GZMA    | 15 | -0.03 | 0.03 | 3.92E-01 |
| GZMB    | 10 | -0.03 | 0.03 | 2.78E-01 |
| GZMH    | 8  | -0.08 | 0.04 | 2.62E-02 |
| HAGH    | 1  | -0.12 | 0.14 | 3.70E-01 |
| HAO1    | 8  | 0.01  | 0.06 | 9.25E-01 |
| HARS1   | 2  | -0.05 | 0.11 | 6.67E-01 |
| HAVCR1  | 7  | 0.03  | 0.02 | 1.41E-01 |
| HAVCR2  | 8  | 0.02  | 0.04 | 5.59E-01 |
| HBEGF   | 23 | 0.01  | 0.03 | 6.14E-01 |
| HBQ1    | 2  | -0.03 | 0.03 | 2.86E-01 |
| HCLS1   | 4  | -0.03 | 0.07 | 6.97E-01 |
| HDGF    | 2  | -0.02 | 0.01 | 5.07E-03 |
| HEBP1   | 1  | 0.01  | 0.08 | 9.17E-01 |
| HEXIM1  | 4  | -0.01 | 0.06 | 9.07E-01 |
| HGF     | 5  | -0.12 | 0.05 | 2.46E-02 |
| HGS     | 4  | -0.06 | 0.09 | 4.55E-01 |
| HLA-DRA | 3  | -0.02 | 0.03 | 4.19E-01 |
| HLA-E   | 4  | 0.05  | 0.03 | 4.91E-02 |
| HMBS    | 1  | 0.03  | 0.08 | 7.02E-01 |

|             |    |       |      |          |
|-------------|----|-------|------|----------|
| HMOX1       | 18 | -0.03 | 0.03 | 2.66E-01 |
| HMOX2       | 4  | -0.06 | 0.06 | 3.79E-01 |
| HNMT        | 4  | 0.00  | 0.01 | 8.49E-01 |
| HNRNPK      | 1  | -0.03 | 0.16 | 8.35E-01 |
| HPGDS       | 2  | 0.03  | 0.02 | 2.41E-01 |
| HS3ST3B1    | 10 | 0.00  | 0.03 | 8.56E-01 |
| HS6ST1      | 15 | 0.00  | 0.03 | 9.99E-01 |
| HSD11B1     | 12 | 0.04  | 0.03 | 1.45E-01 |
| HSPA1A      | 3  | -0.03 | 0.09 | 7.41E-01 |
| HSPB1       | 5  | 0.02  | 0.06 | 7.68E-01 |
| HSPB6       | 5  | -0.17 | 0.09 | 7.01E-02 |
| HSPG2       | 4  | 0.07  | 0.05 | 1.91E-01 |
| HTRA2       | 1  | -0.04 | 0.19 | 8.35E-01 |
| HYAL1       | 3  | 0.02  | 0.04 | 5.00E-01 |
| HYOU1       | 13 | 0.00  | 0.03 | 9.40E-01 |
| ICA1        | 2  | -0.13 | 0.05 | 4.06E-03 |
| ICAM1       | 6  | -0.09 | 0.02 | 3.16E-05 |
| ICAM2       | 10 | -0.05 | 0.01 | 9.22E-09 |
| ICAM3       | 21 | -0.04 | 0.02 | 2.76E-02 |
| ICAM4       | 14 | 0.06  | 0.03 | 5.74E-02 |
| ICAM5       | 7  | -0.08 | 0.01 | 8.06E-11 |
| ICOSLG      | 4  | 0.04  | 0.04 | 2.86E-01 |
| IDI2        | 1  | 0.01  | 0.03 | 7.89E-01 |
| IDS         | 3  | -0.13 | 0.04 | 2.50E-03 |
| IDUA        | 13 | 0.01  | 0.02 | 5.63E-01 |
| IFNG        | 2  | -0.41 | 0.15 | 5.58E-03 |
| IFNGR1      | 10 | 0.04  | 0.03 | 2.65E-01 |
| IFNGR2      | 9  | -0.02 | 0.01 | 1.01E-01 |
| IFNL1       | 5  | 0.00  | 0.07 | 9.72E-01 |
| IFNLR1      | 3  | -0.02 | 0.04 | 5.50E-01 |
| IGF1R       | 9  | -0.17 | 0.02 | 3.84E-14 |
| IGF2R       | 14 | -0.03 | 0.02 | 1.45E-01 |
| IGFBP1      | 2  | -0.07 | 0.10 | 4.50E-01 |
| IGFBP2      | 4  | -0.03 | 0.09 | 7.54E-01 |
| IGFBP3      | 5  | 0.01  | 0.02 | 8.11E-01 |
| IGFBP4      | 3  | -0.02 | 0.11 | 8.21E-01 |
| IGFBP6      | 3  | -0.02 | 0.10 | 8.32E-01 |
| IGFBP7      | 3  | 0.01  | 0.03 | 7.76E-01 |
| IGFBPL1     | 2  | 0.02  | 0.02 | 3.19E-01 |
| IGSF3       | 5  | 0.04  | 0.06 | 4.83E-01 |
| IGSF8       | 5  | 0.03  | 0.05 | 5.48E-01 |
| IKBKG       | 1  | -0.05 | 0.20 | 8.04E-01 |
| IKZF2       | 2  | -0.10 | 0.09 | 2.72E-01 |
| IL10        | 5  | 0.00  | 0.04 | 9.51E-01 |
| IL10RA      | 1  | 0.02  | 0.07 | 7.39E-01 |
| IL10RB      | 6  | 0.01  | 0.02 | 7.06E-01 |
| IL11        | 1  | -0.02 | 0.26 | 9.54E-01 |
| IL12A_IL12B | 17 | -0.04 | 0.02 | 1.04E-02 |
| IL12B       | 20 | -0.04 | 0.02 | 9.39E-03 |
| IL12RB1     | 5  | 0.00  | 0.02 | 9.70E-01 |
| IL13        | 1  | -0.09 | 0.17 | 5.99E-01 |
| IL13RA1     | 2  | 0.02  | 0.11 | 8.29E-01 |
| IL15        | 21 | 0.01  | 0.03 | 7.81E-01 |
| IL15RA      | 1  | 0.02  | 0.04 | 6.87E-01 |
| IL16        | 1  | -0.14 | 0.15 | 3.40E-01 |
| IL17C       | 3  | -0.12 | 0.08 | 1.08E-01 |
| IL17D       | 3  | -0.06 | 0.03 | 3.70E-02 |
| IL17F       | 1  | 0.15  | 0.21 | 4.54E-01 |
| IL17RA      | 3  | 0.01  | 0.01 | 5.03E-01 |
| IL17RB      | 11 | -0.01 | 0.01 | 3.31E-01 |
| IL18        | 9  | -0.05 | 0.02 | 3.25E-02 |

|          |    |       |      |          |
|----------|----|-------|------|----------|
| IL18BP   | 9  | -0.06 | 0.04 | 2.03E-01 |
| IL18R1   | 12 | -0.01 | 0.01 | 2.92E-01 |
| IL18RAP  | 3  | 0.12  | 0.07 | 9.54E-02 |
| IL19     | 4  | -0.07 | 0.02 | 9.35E-04 |
| IL1A     | 1  | 0.07  | 0.08 | 3.64E-01 |
| IL1B     | 2  | 0.00  | 0.04 | 9.45E-01 |
| IL1R1    | 13 | -0.02 | 0.02 | 4.97E-01 |
| IL1R2    | 14 | 0.02  | 0.02 | 2.36E-01 |
| IL1RAP   | 4  | -0.01 | 0.01 | 1.84E-01 |
| IL1RL1   | 13 | 0.00  | 0.01 | 8.37E-01 |
| IL1RL2   | 12 | 0.01  | 0.02 | 6.90E-01 |
| IL1RN    | 2  | 0.01  | 0.05 | 8.95E-01 |
| IL20RA   | 1  | 0.03  | 0.19 | 8.87E-01 |
| IL22RA1  | 2  | 0.10  | 0.03 | 2.08E-03 |
| IL2RA    | 8  | 0.00  | 0.02 | 8.21E-01 |
| IL32     | 7  | -0.02 | 0.04 | 6.81E-01 |
| IL33     | 1  | -0.04 | 0.31 | 8.90E-01 |
| IL34     | 1  | -0.02 | 0.02 | 2.17E-01 |
| IL3RA    | 4  | -0.03 | 0.08 | 6.67E-01 |
| IL4R     | 5  | -0.03 | 0.03 | 2.87E-01 |
| IL5RA    | 23 | 0.06  | 0.02 | 6.46E-03 |
| IL6      | 4  | -0.07 | 0.04 | 1.38E-01 |
| IL6R     | 5  | -0.02 | 0.01 | 5.44E-02 |
| IL6ST    | 10 | -0.09 | 0.03 | 8.23E-04 |
| IL7      | 3  | -0.11 | 0.08 | 1.43E-01 |
| IL7R     | 12 | -0.04 | 0.01 | 5.39E-05 |
| ILKAP    | 1  | -0.04 | 0.17 | 8.35E-01 |
| IMPA1    | 2  | -0.05 | 0.05 | 3.39E-01 |
| ING1     | 1  | -0.04 | 0.18 | 8.35E-01 |
| INHBC    | 6  | -0.01 | 0.02 | 4.83E-01 |
| INPP1    | 3  | -0.15 | 0.09 | 9.42E-02 |
| IPCEF1   | 2  | -0.01 | 0.10 | 8.81E-01 |
| IQGAP2   | 1  | 0.02  | 0.07 | 8.22E-01 |
| IRAG2    | 2  | -0.27 | 0.12 | 2.23E-02 |
| IRAK1    | 1  | -0.04 | 0.17 | 8.04E-01 |
| ISLR2    | 8  | -0.12 | 0.02 | 6.66E-13 |
| ISM1     | 2  | -0.04 | 0.06 | 5.06E-01 |
| ITGA11   | 5  | 0.07  | 0.04 | 7.52E-02 |
| ITGA5    | 10 | 0.00  | 0.04 | 8.98E-01 |
| ITGA6    | 7  | -0.06 | 0.03 | 4.50E-02 |
| ITGAM    | 9  | -0.03 | 0.04 | 4.41E-01 |
| ITGAV    | 5  | -0.03 | 0.05 | 6.09E-01 |
| ITGB1    | 7  | -0.12 | 0.05 | 1.02E-02 |
| ITGB1BP2 | 4  | 0.05  | 0.07 | 5.22E-01 |
| ITGB2    | 10 | -0.07 | 0.04 | 6.59E-02 |
| ITGB5    | 5  | 0.06  | 0.06 | 3.38E-01 |
| ITGB6    | 9  | -0.12 | 0.03 | 1.45E-04 |
| ITGB7    | 18 | 0.03  | 0.02 | 1.05E-01 |
| ITIH3    | 7  | -0.03 | 0.03 | 1.97E-01 |
| ITM2A    | 2  | 0.06  | 0.05 | 2.11E-01 |
| JAM2     | 6  | 0.09  | 0.04 | 4.18E-02 |
| JCHAIN   | 14 | 0.04  | 0.05 | 3.99E-01 |
| KAZALD1  | 6  | -0.02 | 0.01 | 2.26E-01 |
| KDR      | 12 | -0.01 | 0.02 | 6.06E-01 |
| KEL      | 17 | -0.09 | 0.02 | 2.79E-08 |
| KIFBP    | 3  | 0.05  | 0.07 | 4.44E-01 |
| KIR2DL3  | 4  | 0.02  | 0.02 | 4.75E-01 |
| KIR3DL1  | 1  | 0.66  | 0.28 | 1.79E-02 |
| KIRREL2  | 8  | 0.03  | 0.02 | 1.87E-01 |
| KIT      | 23 | -0.01 | 0.03 | 6.59E-01 |
| KITLG    | 15 | -0.03 | 0.03 | 2.73E-01 |

|                |    |       |      |          |
|----------------|----|-------|------|----------|
| KLB            | 9  | 0.02  | 0.01 | 1.29E-01 |
| KLK1           | 13 | -0.05 | 0.01 | 7.58E-07 |
| KLK10          | 4  | 0.02  | 0.02 | 1.68E-01 |
| KLK11          | 5  | -0.03 | 0.03 | 3.36E-01 |
| KLK12          | 5  | 0.01  | 0.01 | 2.18E-01 |
| KLK13          | 10 | 0.04  | 0.02 | 3.11E-02 |
| KLK14          | 10 | 0.00  | 0.02 | 8.71E-01 |
| KLK4           | 3  | -0.02 | 0.03 | 5.60E-01 |
| KLK6           | 2  | -0.03 | 0.06 | 6.48E-01 |
| KLK8           | 4  | 0.04  | 0.03 | 1.66E-01 |
| KLRB1          | 11 | -0.06 | 0.04 | 1.39E-01 |
| KLRD1          | 13 | -0.01 | 0.02 | 7.06E-01 |
| KRT18          | 9  | -0.12 | 0.05 | 1.72E-02 |
| KRT19          | 3  | 0.19  | 0.06 | 3.11E-03 |
| KRT5           | 4  | 0.08  | 0.05 | 1.46E-01 |
| KYAT1          | 4  | -0.06 | 0.08 | 4.80E-01 |
| KYNU           | 4  | -0.05 | 0.04 | 1.42E-01 |
| L1CAM          | 6  | 0.03  | 0.05 | 4.88E-01 |
| LACTB2         | 3  | 0.09  | 0.07 | 1.79E-01 |
| LAG3           | 12 | -0.08 | 0.03 | 7.40E-03 |
| LAIR1          | 4  | 0.02  | 0.02 | 3.26E-01 |
| LAIR2          | 5  | -0.01 | 0.01 | 6.66E-01 |
| LAMA4          | 11 | 0.01  | 0.03 | 8.34E-01 |
| LAMP2          | 2  | 0.09  | 0.14 | 5.24E-01 |
| LAMP3          | 10 | -0.17 | 0.04 | 9.72E-06 |
| LAT            | 6  | 0.03  | 0.06 | 6.02E-01 |
| LAT2           | 1  | -0.04 | 0.16 | 8.04E-01 |
| LAYN           | 4  | 0.01  | 0.02 | 5.54E-01 |
| LBP            | 2  | -0.03 | 0.02 | 4.71E-02 |
| LBR            | 6  | -0.08 | 0.04 | 9.01E-02 |
| LCN2           | 17 | -0.01 | 0.04 | 7.80E-01 |
| LDLR           | 16 | 0.02  | 0.03 | 4.98E-01 |
| LEFTY2         | 4  | -0.56 | 0.09 | 8.93E-10 |
| LEP            | 1  | 0.41  | 0.22 | 6.02E-02 |
| LEPR           | 9  | 0.02  | 0.03 | 5.48E-01 |
| LGALS1         | 2  | 0.01  | 0.04 | 8.20E-01 |
| LGALS3         | 5  | -0.01 | 0.02 | 5.65E-01 |
| LGALS4         | 3  | -0.18 | 0.02 | 4.66E-22 |
| LGALS7_LGALS7B | 7  | 0.16  | 0.02 | 6.22E-11 |
| LGALS8         | 6  | -0.13 | 0.02 | 2.58E-10 |
| LGALS9         | 4  | -0.06 | 0.03 | 1.51E-02 |
| LGMN           | 19 | -0.01 | 0.03 | 6.20E-01 |
| LHB            | 1  | 0.27  | 0.18 | 1.35E-01 |
| LIFR           | 11 | -0.15 | 0.02 | 1.32E-11 |
| LILRA2         | 11 | -0.06 | 0.02 | 4.10E-03 |
| LILRA5         | 9  | -0.04 | 0.04 | 3.00E-01 |
| LILRB1         | 9  | 0.00  | 0.02 | 9.12E-01 |
| LILRB2         | 10 | -0.02 | 0.01 | 4.82E-02 |
| LILRB4         | 4  | -0.03 | 0.05 | 5.91E-01 |
| LILRB5         | 3  | 0.00  | 0.01 | 8.65E-01 |
| LPCAT2         | 1  | -0.01 | 0.09 | 8.65E-01 |
| LPL            | 8  | -0.04 | 0.02 | 1.28E-01 |
| LPO            | 12 | 0.01  | 0.02 | 5.98E-01 |
| LRIG1          | 11 | -0.01 | 0.01 | 6.62E-01 |
| LRP1           | 11 | -0.02 | 0.01 | 1.87E-01 |
| LRP11          | 6  | 0.01  | 0.02 | 4.47E-01 |
| LRPAP1         | 7  | 0.00  | 0.01 | 7.33E-01 |
| LRRC25         | 13 | 0.00  | 0.02 | 8.97E-01 |
| LRRN1          | 7  | 0.00  | 0.01 | 9.21E-01 |
| LSP1           | 2  | -0.07 | 0.07 | 3.22E-01 |
| LTA            | 10 | 0.01  | 0.01 | 3.78E-01 |



|           |    |       |      |          |
|-----------|----|-------|------|----------|
| LTA4H     | 1  | -0.07 | 0.10 | 4.89E-01 |
| LTBP2     | 7  | -0.06 | 0.06 | 3.16E-01 |
| LTBP3     | 6  | -0.02 | 0.02 | 3.91E-01 |
| LTBR      | 13 | 0.00  | 0.02 | 9.86E-01 |
| LXN       | 2  | 0.01  | 0.05 | 7.82E-01 |
| LY6D      | 5  | 0.01  | 0.03 | 6.07E-01 |
| LY75      | 6  | -0.01 | 0.01 | 2.77E-01 |
| LY9       | 14 | 0.01  | 0.02 | 6.86E-01 |
| LY96      | 11 | 0.01  | 0.05 | 8.30E-01 |
| LYAR      | 1  | -0.16 | 0.20 | 4.20E-01 |
| LYN       | 5  | -0.18 | 0.08 | 2.16E-02 |
| LYPD3     | 17 | -0.04 | 0.02 | 2.58E-02 |
| LYPD8     | 7  | 0.01  | 0.02 | 7.63E-01 |
| MAD1L1    | 1  | -0.07 | 0.10 | 4.94E-01 |
| MAGED1    | 2  | -0.03 | 0.10 | 7.76E-01 |
| MANF      | 6  | -0.05 | 0.07 | 4.50E-01 |
| MANSC1    | 17 | -0.03 | 0.04 | 4.97E-01 |
| MAP2K6    | 2  | -0.15 | 0.11 | 1.71E-01 |
| MAP3K5    | 1  | -0.04 | 0.18 | 8.04E-01 |
| MAP4K5    | 3  | 0.06  | 0.05 | 2.58E-01 |
| MAPK9     | 1  | -0.11 | 0.08 | 1.77E-01 |
| MARCO     | 9  | -0.07 | 0.03 | 5.47E-03 |
| MASP1     | 13 | 0.00  | 0.02 | 9.99E-01 |
| MATN2     | 5  | -0.01 | 0.02 | 5.60E-01 |
| MATN3     | 4  | -0.02 | 0.02 | 2.77E-01 |
| MAVS      | 3  | -0.01 | 0.08 | 9.26E-01 |
| MAX       | 5  | 0.09  | 0.07 | 2.20E-01 |
| MB        | 8  | 0.02  | 0.06 | 7.18E-01 |
| MCAM      | 8  | 0.11  | 0.04 | 2.68E-03 |
| MCFD2     | 4  | 0.04  | 0.06 | 5.02E-01 |
| MDGA1     | 6  | 0.00  | 0.01 | 6.27E-01 |
| MDK       | 11 | -0.01 | 0.05 | 9.13E-01 |
| MED18     | 1  | -0.35 | 0.17 | 3.59E-02 |
| MEGF10    | 13 | -0.01 | 0.02 | 6.88E-01 |
| MEGF9     | 11 | 0.11  | 0.03 | 1.30E-04 |
| MEP1B     | 15 | 0.02  | 0.01 | 5.82E-02 |
| MEPE      | 14 | -0.01 | 0.04 | 7.35E-01 |
| MERTK     | 13 | 0.04  | 0.03 | 2.14E-01 |
| MESD      | 4  | 0.06  | 0.08 | 4.10E-01 |
| MET       | 20 | -0.13 | 0.02 | 3.01E-08 |
| METAP1D   | 2  | -0.13 | 0.12 | 2.66E-01 |
| METAP2    | 4  | -0.06 | 0.07 | 3.42E-01 |
| MFAP5     | 6  | -0.09 | 0.06 | 9.18E-02 |
| MFGE8     | 11 | -0.01 | 0.02 | 5.60E-01 |
| MGLL      | 3  | 0.06  | 0.09 | 4.93E-01 |
| MGMT      | 3  | 0.00  | 0.02 | 9.31E-01 |
| MIA       | 7  | -0.02 | 0.01 | 2.35E-01 |
| MICB_MICA | 8  | -0.02 | 0.01 | 1.26E-02 |
| MIF       | 3  | 0.06  | 0.08 | 3.98E-01 |
| MILR1     | 9  | 0.00  | 0.03 | 8.81E-01 |
| MITD1     | 2  | 0.03  | 0.11 | 7.78E-01 |
| MLN       | 18 | 0.02  | 0.02 | 3.52E-01 |
| MME       | 13 | 0.00  | 0.02 | 7.77E-01 |
| MMP1      | 12 | 0.00  | 0.02 | 9.38E-01 |
| MMP10     | 2  | -0.11 | 0.03 | 3.26E-04 |
| MMP12     | 2  | -0.01 | 0.02 | 6.94E-01 |
| MMP13     | 1  | 0.01  | 0.08 | 8.70E-01 |
| MMP3      | 4  | 0.02  | 0.02 | 3.51E-01 |
| MMP7      | 5  | -0.03 | 0.03 | 3.92E-01 |
| MMP8      | 2  | 0.00  | 0.02 | 9.98E-01 |
| MMP9      | 9  | -0.07 | 0.04 | 8.13E-02 |

|         |    |       |      |          |
|---------|----|-------|------|----------|
| MNDA    | 1  | -0.75 | 0.20 | 1.32E-04 |
| MOG     | 2  | 0.06  | 0.04 | 2.02E-01 |
| MPHOSP8 | 2  | -0.06 | 0.10 | 5.42E-01 |
| MPI     | 4  | -0.01 | 0.04 | 8.70E-01 |
| MPIG6B  | 5  | 0.01  | 0.06 | 9.23E-01 |
| MPO     | 7  | -0.11 | 0.04 | 4.48E-03 |
| MSLN    | 8  | -0.04 | 0.02 | 1.36E-02 |
| MSMB    | 5  | -0.01 | 0.01 | 2.52E-01 |
| MSR1    | 12 | -0.01 | 0.03 | 5.94E-01 |
| MSRA    | 2  | -0.04 | 0.12 | 7.12E-01 |
| MSTN    | 5  | 0.10  | 0.08 | 2.07E-01 |
| MUC13   | 4  | -0.16 | 0.03 | 5.88E-07 |
| MUC16   | 3  | 0.00  | 0.05 | 9.33E-01 |
| MYO9B   | 1  | 0.31  | 0.26 | 2.20E-01 |
| MYOC    | 10 | 0.05  | 0.04 | 1.84E-01 |
| MZB1    | 7  | 0.02  | 0.05 | 7.30E-01 |
| MZT1    | 2  | -0.23 | 0.12 | 6.07E-02 |
| NAAA    | 15 | 0.00  | 0.01 | 9.39E-01 |
| NADK    | 5  | -0.01 | 0.03 | 6.63E-01 |
| NBL1    | 3  | 0.05  | 0.08 | 4.97E-01 |
| NBN     | 3  | 0.03  | 0.10 | 7.32E-01 |
| NCAM1   | 7  | -0.05 | 0.03 | 8.88E-02 |
| NCAM2   | 5  | 0.04  | 0.04 | 3.78E-01 |
| NCAN    | 12 | -0.05 | 0.04 | 2.39E-01 |
| NCF2    | 4  | -0.04 | 0.05 | 4.31E-01 |
| NCK2    | 1  | 0.04  | 0.24 | 8.55E-01 |
| NCR1    | 22 | -0.05 | 0.02 | 6.01E-02 |
| NCS1    | 8  | -0.06 | 0.06 | 2.94E-01 |
| NECTIN2 | 4  | 0.09  | 0.04 | 1.74E-02 |
| NECTIN4 | 6  | 0.05  | 0.04 | 1.51E-01 |
| NEFL    | 2  | -0.28 | 0.16 | 6.99E-02 |
| NELL1   | 18 | 0.02  | 0.02 | 2.46E-01 |
| NELL2   | 14 | -0.17 | 0.04 | 1.29E-05 |
| NFASC   | 5  | -0.05 | 0.03 | 3.71E-02 |
| NFATC1  | 2  | 0.06  | 0.08 | 4.53E-01 |
| NFATC3  | 1  | 0.14  | 0.18 | 4.26E-01 |
| NFKBIE  | 2  | 0.05  | 0.05 | 3.48E-01 |
| NID1    | 10 | 0.01  | 0.03 | 6.85E-01 |
| NID2    | 15 | 0.02  | 0.02 | 3.31E-01 |
| NME3    | 13 | -0.08 | 0.03 | 3.51E-03 |
| NMNAT1  | 4  | -0.05 | 0.04 | 2.42E-01 |
| NOMO1   | 3  | 0.05  | 0.07 | 5.24E-01 |
| NOS1    | 2  | -0.03 | 0.10 | 7.61E-01 |
| NOS3    | 2  | -0.29 | 0.12 | 1.20E-02 |
| NOTCH1  | 6  | 0.04  | 0.03 | 2.09E-01 |
| NOTCH3  | 10 | -0.10 | 0.05 | 4.40E-02 |
| NPDC1   | 5  | -0.10 | 0.08 | 2.19E-01 |
| NPPB    | 2  | 0.02  | 0.05 | 6.50E-01 |
| NPPC    | 2  | 0.08  | 0.15 | 5.91E-01 |
| NPTX1   | 14 | -0.04 | 0.02 | 2.77E-02 |
| NPTXR   | 4  | 0.00  | 0.02 | 8.80E-01 |
| NPY     | 12 | -0.06 | 0.03 | 5.45E-02 |
| NRCAM   | 7  | -0.26 | 0.06 | 4.28E-06 |
| NRP1    | 6  | -0.03 | 0.03 | 3.14E-01 |
| NRP2    | 9  | 0.11  | 0.04 | 6.76E-03 |
| NRTN    | 1  | 0.23  | 0.20 | 2.50E-01 |
| NSFL1C  | 2  | 0.09  | 0.10 | 3.64E-01 |
| NT5C3A  | 4  | 0.11  | 0.07 | 1.21E-01 |
| NT5E    | 10 | -0.01 | 0.02 | 5.02E-01 |
| NTF3    | 4  | 0.02  | 0.05 | 6.42E-01 |
| NTF4    | 1  | -0.10 | 0.19 | 5.89E-01 |

|          |    |       |      |          |
|----------|----|-------|------|----------|
| NTproBNP | 4  | 0.03  | 0.04 | 3.94E-01 |
| NTRK2    | 7  | 0.11  | 0.07 | 9.97E-02 |
| NTRK3    | 10 | -0.02 | 0.04 | 5.17E-01 |
| NUB1     | 4  | -0.04 | 0.05 | 4.09E-01 |
| NUCB2    | 5  | 0.02  | 0.02 | 4.94E-01 |
| NUDC     | 2  | -0.03 | 0.10 | 7.73E-01 |
| NUDT2    | 2  | 0.04  | 0.04 | 2.65E-01 |
| NUDT5    | 2  | -0.15 | 0.11 | 1.86E-01 |
| OBP2B    | 12 | -0.01 | 0.02 | 4.69E-01 |
| ODAM     | 2  | -0.03 | 0.04 | 4.09E-01 |
| OGFR     | 2  | 0.10  | 0.10 | 3.12E-01 |
| OGN      | 4  | 0.01  | 0.02 | 5.28E-01 |
| OLR1     | 6  | -0.03 | 0.06 | 6.32E-01 |
| OMD      | 6  | -0.08 | 0.05 | 1.32E-01 |
| OMG      | 8  | -0.04 | 0.05 | 5.12E-01 |
| OPTC     | 7  | 0.08  | 0.05 | 9.96E-02 |
| OSCAR    | 9  | 0.01  | 0.02 | 6.70E-01 |
| OSM      | 8  | -0.12 | 0.04 | 3.80E-03 |
| OSMR     | 5  | 0.02  | 0.02 | 3.57E-01 |
| OXT      | 10 | 0.00  | 0.02 | 8.48E-01 |
| P4HB     | 4  | 0.07  | 0.09 | 4.47E-01 |
| PADI2    | 1  | -0.08 | 0.08 | 3.41E-01 |
| PADI4    | 1  | 0.03  | 0.04 | 3.55E-01 |
| PAEP     | 3  | -0.01 | 0.01 | 5.81E-01 |
| PAG1     | 6  | -0.01 | 0.06 | 8.10E-01 |
| PAK4     | 1  | -0.05 | 0.19 | 8.04E-01 |
| PAM      | 4  | -0.01 | 0.02 | 8.08E-01 |
| PAMR1    | 4  | -0.02 | 0.03 | 3.56E-01 |
| PAPPA    | 11 | 0.04  | 0.03 | 2.63E-01 |
| PARK7    | 5  | -0.02 | 0.06 | 7.52E-01 |
| PARP1    | 2  | -0.01 | 0.06 | 8.36E-01 |
| PBLD     | 1  | 0.02  | 0.02 | 2.61E-01 |
| PCDH1    | 5  | -0.13 | 0.07 | 7.20E-02 |
| PCDH17   | 8  | 0.03  | 0.02 | 1.24E-01 |
| PCOLCE   | 1  | 0.13  | 0.07 | 6.92E-02 |
| PCSK9    | 9  | 0.00  | 0.03 | 9.56E-01 |
| PDCD1    | 12 | -0.05 | 0.05 | 2.80E-01 |
| PDCD1LG2 | 8  | -0.04 | 0.01 | 2.20E-03 |
| PDCD5    | 2  | -0.03 | 0.03 | 3.10E-01 |
| PDCD6    | 4  | -0.02 | 0.01 | 5.18E-02 |
| PDGFA    | 17 | 0.03  | 0.03 | 2.59E-01 |
| PDGFB    | 17 | 0.02  | 0.03 | 5.37E-01 |
| PDGFC    | 7  | -0.04 | 0.03 | 2.31E-01 |
| PDGFRA   | 9  | 0.02  | 0.03 | 4.24E-01 |
| PDGFRB   | 2  | -0.01 | 0.01 | 4.10E-01 |
| PDLIM7   | 3  | 0.04  | 0.09 | 6.85E-01 |
| PEAR1    | 9  | 0.04  | 0.03 | 1.34E-01 |
| PEBP1    | 2  | -0.10 | 0.12 | 4.41E-01 |
| PECAM1   | 8  | -0.14 | 0.02 | 1.46E-13 |
| PFKFB2   | 4  | -0.02 | 0.05 | 7.45E-01 |
| PGF      | 3  | -0.04 | 0.09 | 6.58E-01 |
| PGLYRP1  | 12 | -0.01 | 0.03 | 7.39E-01 |
| PI3      | 4  | 0.01  | 0.03 | 7.27E-01 |
| PIGR     | 6  | 0.12  | 0.04 | 4.15E-03 |
| PIK3AP1  | 7  | -0.08 | 0.04 | 4.53E-02 |
| PIK3IP1  | 3  | -0.04 | 0.03 | 1.80E-01 |
| PILRA    | 6  | 0.00  | 0.01 | 8.82E-01 |
| PILRB    | 4  | 0.00  | 0.01 | 9.06E-01 |
| PKLR     | 4  | -0.19 | 0.05 | 1.53E-04 |
| PLA2G10  | 15 | 0.04  | 0.02 | 6.13E-02 |
| PLA2G15  | 9  | 0.01  | 0.03 | 6.11E-01 |

|          |    |       |      |          |
|----------|----|-------|------|----------|
| PLA2G1B  | 18 | -0.08 | 0.03 | 1.37E-02 |
| PLA2G2A  | 6  | -0.03 | 0.02 | 1.20E-01 |
| PLA2G4A  | 3  | -0.17 | 0.10 | 1.00E-01 |
| PLA2G7   | 10 | -0.01 | 0.03 | 8.17E-01 |
| PLAT     | 4  | -0.18 | 0.08 | 2.05E-02 |
| PLAU     | 10 | 0.02  | 0.03 | 4.83E-01 |
| PLAUR    | 11 | 0.01  | 0.04 | 7.83E-01 |
| PLIN1    | 1  | -0.09 | 0.19 | 6.36E-01 |
| PLIN3    | 2  | 0.18  | 0.11 | 1.21E-01 |
| PLPBP    | 2  | -0.04 | 0.11 | 7.46E-01 |
| PLTP     | 11 | 0.01  | 0.02 | 5.30E-01 |
| PLXDC1   | 5  | -0.05 | 0.04 | 1.62E-01 |
| PLXNA4   | 5  | -0.01 | 0.05 | 8.05E-01 |
| PLXNB2   | 11 | -0.02 | 0.01 | 1.06E-01 |
| PLXNB3   | 5  | 0.07  | 0.08 | 3.99E-01 |
| PM20D1   | 8  | -0.01 | 0.02 | 4.93E-01 |
| PMVK     | 6  | -0.07 | 0.06 | 2.92E-01 |
| PNLIPRP2 | 7  | -0.02 | 0.01 | 4.54E-02 |
| PNPT1    | 2  | 0.09  | 0.12 | 4.26E-01 |
| PODXL    | 6  | -0.13 | 0.02 | 2.84E-13 |
| PODXL2   | 12 | 0.02  | 0.04 | 6.84E-01 |
| POLR2F   | 1  | -0.25 | 0.18 | 1.68E-01 |
| PON2     | 3  | -0.02 | 0.01 | 2.56E-01 |
| PON3     | 9  | 0.04  | 0.03 | 1.60E-01 |
| PPCDC    | 2  | 0.01  | 0.03 | 7.58E-01 |
| PPIB     | 3  | -0.05 | 0.10 | 6.00E-01 |
| PPME1    | 1  | 0.04  | 0.19 | 8.22E-01 |
| PPP1R12A | 4  | 0.06  | 0.08 | 4.62E-01 |
| PPP1R2   | 3  | -0.04 | 0.09 | 6.61E-01 |
| PPP1R9B  | 2  | -0.03 | 0.12 | 7.72E-01 |
| PPP3R1   | 5  | -0.11 | 0.07 | 1.19E-01 |
| PPY      | 8  | -0.04 | 0.04 | 3.44E-01 |
| PRCP     | 12 | 0.02  | 0.03 | 5.46E-01 |
| PRDX1    | 2  | -0.07 | 0.12 | 5.32E-01 |
| PRDX3    | 1  | -0.14 | 0.15 | 3.81E-01 |
| PRDX5    | 2  | -0.09 | 0.09 | 3.00E-01 |
| PRDX6    | 1  | 0.05  | 0.07 | 4.75E-01 |
| PRELP    | 1  | -0.01 | 0.02 | 7.83E-01 |
| PRKAB1   | 2  | 0.01  | 0.15 | 9.57E-01 |
| PRKAR1A  | 5  | -0.01 | 0.05 | 7.58E-01 |
| PRKRA    | 1  | -0.02 | 0.10 | 8.04E-01 |
| PRL      | 3  | 0.03  | 0.09 | 7.71E-01 |
| PROC     | 8  | 0.00  | 0.04 | 9.02E-01 |
| PROK1    | 2  | 0.03  | 0.03 | 3.00E-01 |
| PRSS2    | 13 | -0.01 | 0.04 | 6.74E-01 |
| PRSS27   | 18 | -0.08 | 0.01 | 2.89E-08 |
| PRSS8    | 8  | -0.04 | 0.05 | 3.83E-01 |
| PRTFDC1  | 3  | -0.02 | 0.06 | 7.87E-01 |
| PRTG     | 9  | 0.05  | 0.02 | 2.26E-02 |
| PRTN3    | 15 | 0.00  | 0.03 | 9.05E-01 |
| PSG1     | 7  | -0.02 | 0.02 | 4.07E-01 |
| PSIP1    | 3  | -0.10 | 0.07 | 1.18E-01 |
| PSME1    | 3  | -0.08 | 0.09 | 3.81E-01 |
| PSME2    | 1  | -0.06 | 0.12 | 6.05E-01 |
| PSMG3    | 1  | 0.33  | 0.26 | 2.08E-01 |
| PSPN     | 10 | 0.04  | 0.07 | 5.30E-01 |
| PSRC1    | 2  | -0.07 | 0.06 | 2.45E-01 |
| PTGDS    | 2  | 0.20  | 0.13 | 1.29E-01 |
| PTH1R    | 1  | 0.13  | 0.06 | 4.09E-02 |
| PTN      | 4  | -0.02 | 0.06 | 6.76E-01 |
| PTPN1    | 3  | -0.13 | 0.08 | 1.05E-01 |

|          |    |       |      |          |
|----------|----|-------|------|----------|
| PTPN6    | 2  | -0.03 | 0.10 | 7.85E-01 |
| PTPRF    | 14 | 0.01  | 0.03 | 8.78E-01 |
| PTPRM    | 8  | -0.12 | 0.02 | 2.93E-14 |
| PTPRN2   | 1  | 0.07  | 0.06 | 2.59E-01 |
| PTPRS    | 5  | 0.09  | 0.03 | 8.13E-03 |
| PTS      | 4  | -0.02 | 0.05 | 6.69E-01 |
| PTX3     | 5  | 0.03  | 0.03 | 3.50E-01 |
| PVALB    | 8  | -0.02 | 0.01 | 1.16E-01 |
| PVR      | 2  | 0.01  | 0.01 | 6.06E-01 |
| PXN      | 3  | -0.01 | 0.01 | 3.46E-01 |
| QDPR     | 1  | -0.04 | 0.16 | 8.04E-01 |
| QPCT     | 11 | -0.02 | 0.03 | 5.74E-01 |
| RAB6A    | 3  | 0.03  | 0.02 | 1.90E-01 |
| RABEPK   | 1  | -0.01 | 0.07 | 9.37E-01 |
| RABGAP1L | 2  | 0.10  | 0.11 | 3.54E-01 |
| RAD23B   | 3  | 0.06  | 0.10 | 5.27E-01 |
| RARRES1  | 1  | 0.01  | 0.02 | 5.55E-01 |
| RARRES2  | 3  | 0.02  | 0.05 | 7.27E-01 |
| RASSF2   | 1  | -0.21 | 0.13 | 1.11E-01 |
| RBKS     | 1  | -0.05 | 0.03 | 1.40E-01 |
| RBP2     | 4  | 0.16  | 0.07 | 3.01E-02 |
| RBP5     | 3  | 0.03  | 0.03 | 4.24E-01 |
| RCOR1    | 1  | 0.08  | 0.17 | 6.25E-01 |
| REG1A    | 5  | 0.22  | 0.03 | 9.72E-18 |
| REG1B    | 7  | 0.18  | 0.02 | 9.56E-15 |
| REG3A    | 9  | 0.05  | 0.04 | 1.96E-01 |
| REG4     | 1  | 0.06  | 0.06 | 3.60E-01 |
| RELT     | 4  | 0.01  | 0.03 | 8.49E-01 |
| REN      | 2  | -0.07 | 0.07 | 3.34E-01 |
| RET      | 8  | 0.05  | 0.02 | 2.73E-02 |
| RETN     | 15 | 0.04  | 0.03 | 1.84E-01 |
| RGMA     | 17 | -0.03 | 0.02 | 2.03E-01 |
| RGMB     | 4  | -0.04 | 0.05 | 4.26E-01 |
| RGS8     | 1  | 0.01  | 0.07 | 9.11E-01 |
| RHOC     | 3  | -0.06 | 0.09 | 5.35E-01 |
| RILP     | 4  | 0.03  | 0.08 | 6.80E-01 |
| RNASE3   | 4  | 0.00  | 0.04 | 9.63E-01 |
| RNASET2  | 9  | 0.04  | 0.02 | 1.21E-01 |
| ROBO1    | 9  | -0.04 | 0.04 | 2.52E-01 |
| ROBO2    | 5  | 0.03  | 0.07 | 6.40E-01 |
| ROR1     | 12 | 0.02  | 0.03 | 4.93E-01 |
| RP2      | 2  | -0.17 | 0.10 | 9.57E-02 |
| RRM2     | 1  | -0.13 | 0.17 | 4.67E-01 |
| RRM2B    | 2  | -0.02 | 0.08 | 8.29E-01 |
| RSPO1    | 10 | 0.00  | 0.03 | 9.30E-01 |
| RSPO3    | 8  | 0.03  | 0.04 | 5.42E-01 |
| RTBDN    | 3  | 0.03  | 0.06 | 6.63E-01 |
| RTN4R    | 10 | -0.05 | 0.03 | 1.06E-01 |
| RWDD1    | 2  | 0.02  | 0.07 | 7.88E-01 |
| S100A11  | 2  | 0.04  | 0.05 | 3.67E-01 |
| S100A12  | 4  | 0.02  | 0.04 | 5.77E-01 |
| S100A16  | 3  | 0.16  | 0.07 | 2.79E-02 |
| S100A4   | 5  | -0.01 | 0.06 | 8.35E-01 |
| S100P    | 5  | -0.17 | 0.06 | 8.01E-03 |
| SAMD9L   | 2  | -0.03 | 0.03 | 3.62E-01 |
| SCAMP3   | 4  | -0.07 | 0.07 | 2.93E-01 |
| SCARA5   | 7  | 0.10  | 0.04 | 2.94E-03 |
| SCARB1   | 1  | -0.03 | 0.26 | 9.19E-01 |
| SCARB2   | 4  | 0.01  | 0.04 | 7.34E-01 |
| SCARF1   | 7  | 0.01  | 0.02 | 6.43E-01 |
| SCARF2   | 8  | -0.08 | 0.03 | 5.58E-03 |

|           |    |       |      |          |
|-----------|----|-------|------|----------|
| SCG2      | 4  | -0.52 | 0.08 | 1.19E-10 |
| SCG3      | 5  | -0.02 | 0.02 | 1.53E-01 |
| SCGB1A1   | 17 | 0.05  | 0.03 | 7.71E-02 |
| SCGB3A2   | 17 | 0.00  | 0.03 | 9.47E-01 |
| SCGN      | 5  | 0.21  | 0.05 | 1.02E-05 |
| SCLY      | 7  | 0.02  | 0.05 | 6.52E-01 |
| SCP2      | 1  | 0.36  | 0.20 | 6.84E-02 |
| SCRN1     | 2  | 0.04  | 0.07 | 6.02E-01 |
| SDC1      | 13 | 0.02  | 0.03 | 4.92E-01 |
| SDC4      | 20 | 0.04  | 0.03 | 1.16E-01 |
| SELE      | 9  | -0.09 | 0.01 | 2.32E-13 |
| SELP      | 10 | -0.08 | 0.03 | 2.81E-03 |
| SELPLG    | 10 | -0.01 | 0.02 | 3.90E-01 |
| SEMA3F    | 5  | -0.34 | 0.07 | 1.47E-06 |
| SEMA4C    | 5  | -0.31 | 0.04 | 1.60E-13 |
| SEMA4D    | 6  | -0.03 | 0.06 | 5.88E-01 |
| SEMA7A    | 18 | 0.01  | 0.03 | 6.37E-01 |
| SEPTIN9   | 2  | 0.21  | 0.11 | 6.50E-02 |
| SERPINA11 | 8  | 0.01  | 0.02 | 6.73E-01 |
| SERPINA12 | 5  | 0.02  | 0.02 | 2.64E-01 |
| SERPINA9  | 3  | 0.00  | 0.02 | 9.90E-01 |
| SERPINB1  | 3  | 0.14  | 0.08 | 8.45E-02 |
| SERPINB6  | 2  | 0.04  | 0.07 | 5.47E-01 |
| SERPINB8  | 2  | -0.02 | 0.02 | 3.17E-01 |
| SERPINB9  | 2  | -0.13 | 0.08 | 9.52E-02 |
| SERPINE1  | 17 | 0.02  | 0.03 | 4.60E-01 |
| SESTD1    | 3  | 0.00  | 0.08 | 9.92E-01 |
| SETMAR    | 1  | -0.02 | 0.05 | 7.46E-01 |
| SEZ6L     | 6  | -0.01 | 0.05 | 7.81E-01 |
| SEZ6L2    | 8  | 0.05  | 0.04 | 2.61E-01 |
| SF3B4     | 4  | 0.03  | 0.08 | 7.22E-01 |
| SFRP1     | 5  | 0.00  | 0.05 | 9.88E-01 |
| SFTPA1    | 1  | -0.14 | 0.05 | 3.15E-03 |
| SFTPA2    | 6  | 0.07  | 0.02 | 2.65E-05 |
| SFTPD     | 11 | -0.07 | 0.01 | 8.06E-09 |
| SH2B3     | 4  | 0.08  | 0.08 | 3.00E-01 |
| SH2D1A    | 2  | -0.12 | 0.08 | 1.49E-01 |
| SHMT1     | 4  | -0.02 | 0.02 | 1.41E-01 |
| SIAE      | 9  | 0.02  | 0.04 | 6.56E-01 |
| SIGLEC1   | 10 | -0.07 | 0.04 | 4.44E-02 |
| SIGLEC10  | 8  | -0.01 | 0.02 | 7.51E-01 |
| SIGLEC5   | 3  | 0.02  | 0.01 | 1.64E-01 |
| SIGLEC6   | 21 | -0.02 | 0.02 | 3.43E-01 |
| SIGLEC7   | 9  | 0.05  | 0.03 | 1.13E-01 |
| SIGLEC9   | 10 | -0.02 | 0.01 | 2.82E-02 |
| SIRPA     | 7  | 0.01  | 0.01 | 6.10E-01 |
| SIRPB1    | 11 | -0.01 | 0.01 | 3.25E-01 |
| SIRT2     | 3  | 0.05  | 0.07 | 4.75E-01 |
| SIT1      | 6  | -0.03 | 0.05 | 5.99E-01 |
| SKAP1     | 8  | 0.00  | 0.06 | 9.51E-01 |
| SKAP2     | 3  | 0.04  | 0.10 | 6.62E-01 |
| SLAMF1    | 5  | 0.06  | 0.06 | 3.08E-01 |
| SLAMF6    | 3  | -0.01 | 0.06 | 8.75E-01 |
| SLAMF7    | 9  | 0.04  | 0.02 | 1.49E-02 |
| SLAMF8    | 5  | 0.01  | 0.01 | 6.63E-01 |
| SLC16A1   | 4  | -0.12 | 0.06 | 5.04E-02 |
| SLC27A4   | 3  | -0.06 | 0.08 | 3.96E-01 |
| SLC39A14  | 2  | 0.00  | 0.09 | 9.58E-01 |
| SLC39A5   | 8  | 0.09  | 0.05 | 8.98E-02 |
| SLIT2     | 1  | 0.17  | 0.18 | 3.64E-01 |
| SLITRK2   | 11 | 0.16  | 0.04 | 1.89E-04 |

|         |    |       |      |          |
|---------|----|-------|------|----------|
| SLITRK6 | 8  | 0.03  | 0.02 | 2.96E-01 |
| SMAD1   | 5  | -0.02 | 0.08 | 7.51E-01 |
| SMAD5   | 1  | 0.05  | 0.06 | 3.36E-01 |
| SMOC1   | 10 | -0.01 | 0.03 | 6.93E-01 |
| SMOC2   | 5  | -0.01 | 0.03 | 7.01E-01 |
| SMPD1   | 15 | -0.01 | 0.02 | 7.76E-01 |
| SMPDL3A | 20 | 0.01  | 0.01 | 4.69E-01 |
| SNAP23  | 3  | -0.02 | 0.07 | 7.49E-01 |
| SNAP29  | 5  | 0.06  | 0.07 | 3.88E-01 |
| SNCG    | 1  | -0.01 | 0.01 | 3.12E-01 |
| SNX9    | 2  | -0.04 | 0.09 | 6.80E-01 |
| SOD1    | 3  | -0.01 | 0.08 | 9.36E-01 |
| SOD2    | 8  | -0.03 | 0.04 | 4.67E-01 |
| SORCS2  | 4  | 0.03  | 0.02 | 2.61E-01 |
| SORD    | 4  | -0.06 | 0.06 | 3.47E-01 |
| SORT1   | 14 | -0.04 | 0.03 | 2.29E-01 |
| SOST    | 14 | 0.07  | 0.03 | 2.60E-02 |
| SPARC   | 14 | 0.02  | 0.04 | 6.35E-01 |
| SPARCL1 | 4  | 0.00  | 0.01 | 9.74E-01 |
| SPINK1  | 2  | 0.01  | 0.03 | 8.04E-01 |
| SPINK4  | 5  | 0.00  | 0.01 | 9.09E-01 |
| SPINK5  | 7  | -0.06 | 0.02 | 9.58E-03 |
| SPINK6  | 1  | 0.00  | 0.03 | 9.69E-01 |
| SPINT1  | 8  | -0.03 | 0.03 | 2.97E-01 |
| SPINT2  | 15 | 0.00  | 0.03 | 9.96E-01 |
| SPOCK1  | 12 | -0.02 | 0.04 | 5.72E-01 |
| SPON1   | 6  | 0.03  | 0.03 | 3.32E-01 |
| SPON2   | 1  | 0.00  | 0.05 | 9.35E-01 |
| SPP1    | 7  | -0.11 | 0.07 | 8.34E-02 |
| SPRY2   | 6  | -0.01 | 0.05 | 8.00E-01 |
| SRC     | 1  | 0.53  | 0.18 | 3.68E-03 |
| SRP14   | 2  | -0.06 | 0.08 | 4.37E-01 |
| SRPK2   | 3  | -0.03 | 0.07 | 6.77E-01 |
| SSC4D   | 11 | 0.03  | 0.02 | 2.22E-01 |
| SSC5D   | 10 | 0.11  | 0.04 | 3.97E-03 |
| ST3GAL1 | 7  | -0.01 | 0.03 | 7.08E-01 |
| ST6GAL1 | 8  | 0.06  | 0.05 | 2.00E-01 |
| STAMBP  | 2  | -0.10 | 0.12 | 4.30E-01 |
| STAT5B  | 3  | -0.03 | 0.09 | 7.24E-01 |
| STC1    | 5  | -0.23 | 0.06 | 1.05E-04 |
| STC2    | 5  | 0.02  | 0.08 | 7.68E-01 |
| STIP1   | 2  | 0.00  | 0.10 | 9.65E-01 |
| STK11   | 4  | -0.05 | 0.08 | 5.68E-01 |
| STK24   | 2  | -0.04 | 0.13 | 7.47E-01 |
| STK4    | 4  | 0.03  | 0.08 | 7.48E-01 |
| STX16   | 1  | -0.14 | 0.19 | 4.49E-01 |
| STX4    | 2  | -0.21 | 0.13 | 1.20E-01 |
| STX6    | 2  | -0.12 | 0.14 | 4.20E-01 |
| STX8    | 3  | 0.04  | 0.09 | 6.38E-01 |
| SUGT1   | 1  | -0.04 | 0.15 | 8.04E-01 |
| SULT1A1 | 1  | -0.13 | 0.11 | 2.45E-01 |
| SULT2A1 | 4  | -0.04 | 0.03 | 2.89E-01 |
| SUMF2   | 14 | -0.02 | 0.02 | 4.69E-01 |
| SUSD1   | 4  | 0.00  | 0.06 | 9.76E-01 |
| SUSD2   | 4  | 0.02  | 0.02 | 3.30E-01 |
| TACC3   | 4  | 0.10  | 0.07 | 1.40E-01 |
| TACSTD2 | 14 | -0.03 | 0.01 | 2.25E-02 |
| TAFA5   | 2  | 0.02  | 0.06 | 7.75E-01 |
| TARBP2  | 3  | -0.04 | 0.09 | 6.71E-01 |
| TBC1D17 | 1  | 0.01  | 0.02 | 6.81E-01 |
| TBC1D23 | 4  | -0.03 | 0.05 | 6.19E-01 |

|           |    |       |      |          |
|-----------|----|-------|------|----------|
| TBC1D5    | 2  | -0.10 | 0.12 | 3.96E-01 |
| TBCB      | 4  | -0.06 | 0.08 | 4.94E-01 |
| TBCC      | 4  | -0.04 | 0.06 | 4.90E-01 |
| TBL1X     | 5  | 0.02  | 0.06 | 6.81E-01 |
| TCL1A     | 21 | -0.03 | 0.03 | 2.30E-01 |
| TCN2      | 2  | 0.00  | 0.02 | 8.64E-01 |
| TDGF1     | 1  | -1.83 | 0.22 | 3.62E-16 |
| TDRKH     | 4  | -0.04 | 0.03 | 1.27E-01 |
| TEK       | 9  | 0.05  | 0.02 | 4.19E-03 |
| TFF1      | 5  | -0.01 | 0.03 | 6.76E-01 |
| TFF2      | 8  | 0.10  | 0.04 | 1.36E-02 |
| TFF3      | 3  | 0.01  | 0.03 | 7.95E-01 |
| TFPI      | 8  | -0.03 | 0.02 | 2.63E-01 |
| TFPI2     | 9  | -0.11 | 0.04 | 8.45E-03 |
| TFRC      | 11 | -0.05 | 0.02 | 2.83E-03 |
| TGFA      | 4  | -0.17 | 0.06 | 3.20E-03 |
| TGFB1     | 10 | -0.08 | 0.03 | 2.02E-02 |
| TGFBI     | 10 | 0.01  | 0.02 | 6.00E-01 |
| TGFBR2    | 8  | -0.30 | 0.05 | 8.27E-10 |
| TGFBR3    | 7  | -0.05 | 0.04 | 2.46E-01 |
| TGM2      | 2  | 0.02  | 0.06 | 7.16E-01 |
| THBD      | 14 | 0.03  | 0.03 | 2.79E-01 |
| THBS2     | 7  | -0.03 | 0.02 | 1.86E-01 |
| THBS4     | 6  | 0.12  | 0.03 | 3.57E-04 |
| THOP1     | 1  | -0.04 | 0.05 | 4.43E-01 |
| THPO      | 17 | 0.02  | 0.03 | 5.39E-01 |
| THY1      | 3  | 0.00  | 0.03 | 8.74E-01 |
| TIA1      | 2  | 0.12  | 0.10 | 2.05E-01 |
| TIE1      | 12 | 0.02  | 0.02 | 1.46E-01 |
| TIGAR     | 2  | -0.03 | 0.13 | 8.14E-01 |
| TIMD4     | 25 | -0.02 | 0.02 | 3.77E-01 |
| TIMP1     | 5  | 0.13  | 0.05 | 1.86E-02 |
| TIMP3     | 17 | 0.01  | 0.02 | 3.36E-01 |
| TIMP4     | 4  | -0.10 | 0.03 | 6.18E-04 |
| TINAGL1   | 9  | 0.02  | 0.05 | 6.99E-01 |
| TJAP1     | 2  | -0.02 | 0.14 | 8.60E-01 |
| TLR3      | 6  | 0.00  | 0.01 | 8.51E-01 |
| TMPRSS15  | 7  | -0.06 | 0.03 | 4.02E-02 |
| TMPRSS5   | 18 | 0.01  | 0.01 | 3.54E-01 |
| TMSB10    | 6  | -0.05 | 0.06 | 4.26E-01 |
| TNC       | 15 | 0.03  | 0.02 | 1.47E-01 |
| TNF       | 2  | -0.06 | 0.06 | 2.91E-01 |
| TNFAIP8   | 1  | 0.00  | 0.13 | 9.82E-01 |
| TNFRSF10A | 4  | -0.01 | 0.02 | 7.30E-01 |
| TNFRSF10B | 3  | 0.01  | 0.03 | 6.73E-01 |
| TNFRSF10C | 16 | 0.01  | 0.01 | 2.50E-01 |
| TNFRSF11A | 6  | 0.08  | 0.02 | 3.61E-04 |
| TNFRSF11B | 9  | -0.04 | 0.04 | 3.00E-01 |
| TNFRSF12A | 2  | -0.20 | 0.13 | 1.18E-01 |
| TNFRSF13B | 11 | -0.05 | 0.04 | 1.59E-01 |
| TNFRSF13C | 12 | 0.01  | 0.05 | 8.86E-01 |
| TNFRSF14  | 5  | -0.05 | 0.06 | 4.02E-01 |
| TNFRSF19  | 4  | -0.03 | 0.04 | 4.16E-01 |
| TNFRSF1A  | 7  | 0.20  | 0.06 | 7.94E-04 |
| TNFRSF1B  | 6  | -0.10 | 0.05 | 2.72E-02 |
| TNFRSF21  | 12 | 0.04  | 0.03 | 2.45E-01 |
| TNFRSF4   | 6  | -0.02 | 0.05 | 6.53E-01 |
| TNFRSF6B  | 3  | -0.02 | 0.03 | 6.39E-01 |
| TNFRSF8   | 8  | -0.06 | 0.04 | 8.82E-02 |
| TNFRSF9   | 6  | 0.04  | 0.06 | 5.02E-01 |
| TNFSF10   | 12 | 0.01  | 0.02 | 5.28E-01 |



|          |    |       |      |          |
|----------|----|-------|------|----------|
| TNFSF11  | 8  | -0.02 | 0.03 | 4.24E-01 |
| TNFSF12  | 16 | 0.04  | 0.02 | 7.09E-02 |
| TNFSF13  | 7  | -0.05 | 0.03 | 6.69E-02 |
| TNFSF13B | 6  | -0.07 | 0.06 | 2.39E-01 |
| TNFSF14  | 5  | 0.00  | 0.03 | 9.02E-01 |
| TNR      | 16 | 0.03  | 0.02 | 1.79E-01 |
| TNXB     | 6  | 0.06  | 0.02 | 1.42E-03 |
| TP53     | 1  | -0.10 | 0.17 | 5.40E-01 |
| TP53INP1 | 1  | 0.08  | 0.09 | 3.66E-01 |
| TPMT     | 2  | -0.02 | 0.02 | 4.10E-01 |
| TPP1     | 12 | -0.01 | 0.03 | 8.35E-01 |
| TPPP3    | 1  | -0.15 | 0.15 | 3.10E-01 |
| TPSAB1   | 13 | 0.01  | 0.01 | 4.72E-01 |
| TRAF2    | 3  | -0.11 | 0.10 | 2.82E-01 |
| TREM2    | 7  | 0.03  | 0.02 | 1.41E-01 |
| TREML2   | 8  | -0.05 | 0.04 | 1.50E-01 |
| TRIAP1   | 6  | -0.10 | 0.05 | 6.38E-02 |
| TRIM21   | 3  | -0.18 | 0.11 | 1.05E-01 |
| TRIM5    | 1  | 0.01  | 0.03 | 8.09E-01 |
| TSHB     | 17 | -0.05 | 0.03 | 1.35E-01 |
| TSPAN1   | 3  | 0.05  | 0.12 | 7.15E-01 |
| TST      | 1  | -0.18 | 0.11 | 9.17E-02 |
| TXLNA    | 3  | -0.03 | 0.07 | 7.22E-01 |
| TXNDC15  | 11 | 0.01  | 0.01 | 4.04E-01 |
| TXNDC5   | 4  | 0.05  | 0.07 | 4.70E-01 |
| TXNRD1   | 4  | -0.04 | 0.08 | 5.91E-01 |
| TYMP     | 2  | -0.08 | 0.05 | 8.94E-02 |
| TYRO3    | 8  | 0.03  | 0.01 | 4.87E-02 |
| UBAC1    | 1  | 0.24  | 0.21 | 2.51E-01 |
| ULBP2    | 7  | 0.05  | 0.02 | 2.07E-02 |
| UMOD     | 16 | 0.00  | 0.01 | 7.71E-01 |
| USO1     | 3  | -0.03 | 0.09 | 7.23E-01 |
| USP8     | 4  | 0.03  | 0.06 | 6.20E-01 |
| UXS1     | 7  | -0.07 | 0.03 | 3.57E-02 |
| VAMP5    | 2  | 0.77  | 0.10 | 2.34E-13 |
| VASH1    | 4  | 0.05  | 0.06 | 4.35E-01 |
| VASN     | 5  | -0.05 | 0.02 | 4.31E-02 |
| VAT1     | 9  | -0.06 | 0.04 | 1.47E-01 |
| VCAM1    | 10 | -0.05 | 0.04 | 1.80E-01 |
| VCAN     | 15 | 0.01  | 0.01 | 2.95E-01 |
| VEGFA    | 13 | 0.01  | 0.01 | 7.15E-01 |
| VEGFC    | 16 | 0.06  | 0.03 | 7.06E-02 |
| VEGFD    | 6  | 0.03  | 0.05 | 5.37E-01 |
| VMO1     | 7  | -0.01 | 0.01 | 4.27E-01 |
| VNN2     | 10 | -0.01 | 0.01 | 6.21E-01 |
| VPS37A   | 2  | -0.02 | 0.13 | 8.71E-01 |
| VPS53    | 2  | -0.04 | 0.12 | 7.68E-01 |
| VSIG4    | 8  | 0.11  | 0.06 | 6.73E-02 |
| VSIR     | 8  | 0.04  | 0.03 | 1.84E-01 |
| VSTM1    | 2  | 0.01  | 0.01 | 3.83E-01 |
| VSTM2L   | 2  | -0.07 | 0.05 | 1.70E-01 |
| VTA1     | 3  | 0.01  | 0.09 | 9.21E-01 |
| VTCN1    | 2  | -0.42 | 0.10 | 1.46E-05 |
| VWA1     | 7  | -0.02 | 0.04 | 5.83E-01 |
| VWC2     | 3  | 0.02  | 0.02 | 4.19E-01 |
| VWF      | 6  | 0.26  | 0.03 | 2.05E-18 |
| WARS     | 3  | -0.06 | 0.04 | 1.65E-01 |
| WAS      | 3  | 0.08  | 0.08 | 2.93E-01 |
| WASF1    | 3  | 0.02  | 0.03 | 5.24E-01 |
| WASF3    | 1  | 0.04  | 0.07 | 6.23E-01 |
| WFDC12   | 12 | -0.02 | 0.02 | 4.15E-01 |

|         |    |       |      |          |
|---------|----|-------|------|----------|
| WFDC2   | 3  | -0.16 | 0.08 | 6.26E-02 |
| WFIKKN1 | 14 | -0.03 | 0.03 | 3.50E-01 |
| WFIKKN2 | 4  | 0.00  | 0.02 | 9.26E-01 |
| WIF1    | 13 | -0.02 | 0.03 | 5.81E-01 |
| WNT9A   | 1  | -0.15 | 0.11 | 1.44E-01 |
| WWP2    | 3  | -0.10 | 0.05 | 5.01E-02 |
| XCL1    | 10 | 0.00  | 0.01 | 8.33E-01 |
| XG      | 1  | -0.29 | 0.18 | 1.03E-01 |
| XPNPEP2 | 12 | 0.00  | 0.04 | 9.44E-01 |
| XRCC4   | 1  | 0.13  | 0.15 | 3.97E-01 |
| YES1    | 2  | -0.03 | 0.10 | 7.51E-01 |
| YTHDF3  | 1  | -0.03 | 0.11 | 8.04E-01 |
| ZBTB16  | 7  | 0.01  | 0.04 | 8.85E-01 |
| ZBTB17  | 2  | -0.07 | 0.11 | 5.10E-01 |

**Supplementary Table 4. Associations of genetically predicted proteins with COVID-19 infection using IVW method and cis+trans SNPs.**

| <b>Protein</b> | <b>No. of SNPs</b> | <b>Beta</b> | <b>SE</b> | <b>Pval</b> |
|----------------|--------------------|-------------|-----------|-------------|
| AARSD1         | 3                  | 0.02        | 0.03      | 4.52E-01    |
| ABHD14B        | 4                  | -0.02       | 0.02      | 4.50E-01    |
| ABL1           | 1                  | -0.01       | 0.06      | 8.82E-01    |
| ACAA1          | 3                  | 0.02        | 0.04      | 5.58E-01    |
| ACAN           | 15                 | 0.04        | 0.02      | 2.77E-02    |
| ACE2           | 9                  | -0.05       | 0.02      | 4.47E-02    |
| ACOX1          | 1                  | -0.07       | 0.07      | 3.05E-01    |
| ACP5           | 10                 | 0.01        | 0.01      | 3.53E-01    |
| ACP6           | 2                  | -0.01       | 0.01      | 2.61E-01    |
| ACTA2          | 1                  | 0.08        | 0.09      | 3.65E-01    |
| ACVRL1         | 4                  | -0.01       | 0.01      | 6.30E-01    |
| ACY1           | 3                  | -0.01       | 0.02      | 7.79E-01    |
| ADA            | 4                  | -0.02       | 0.01      | 6.27E-03    |
| ADA2           | 13                 | -0.02       | 0.01      | 1.35E-01    |
| ADAM15         | 8                  | 0.03        | 0.01      | 3.16E-09    |
| ADAM22         | 6                  | 0.00        | 0.01      | 7.15E-01    |
| ADAM23         | 5                  | 0.02        | 0.01      | 7.62E-02    |
| ADAM8          | 7                  | -0.01       | 0.01      | 2.96E-01    |
| ADAMTS13       | 13                 | 0.01        | 0.01      | 3.75E-01    |
| ADAMTS15       | 5                  | 0.05        | 0.03      | 6.23E-02    |
| ADAMTS16       | 1                  | -0.04       | 0.04      | 2.77E-01    |
| ADAMTS8        | 4                  | 0.00        | 0.01      | 6.61E-01    |
| ADGRB3         | 5                  | 0.01        | 0.01      | 1.89E-01    |
| ADGRE2         | 9                  | -0.01       | 0.01      | 4.96E-01    |
| ADGRE5         | 10                 | -0.02       | 0.02      | 1.17E-01    |
| ADGRG1         | 10                 | -0.14       | 0.02      | 1.91E-12    |
| ADGRG2         | 6                  | 0.24        | 0.03      | 2.38E-14    |
| ADH4           | 6                  | -0.02       | 0.02      | 4.03E-01    |
| ADM            | 2                  | 0.00        | 0.04      | 9.82E-01    |
| AFP            | 23                 | 0.00        | 0.01      | 9.90E-01    |
| AGER           | 15                 | 0.01        | 0.02      | 5.34E-01    |
| AGR2           | 5                  | 0.08        | 0.03      | 1.30E-02    |
| AGR3           | 3                  | -0.01       | 0.05      | 8.98E-01    |
| AGRN           | 6                  | 0.01        | 0.01      | 3.88E-01    |
| AGRP           | 8                  | -0.01       | 0.03      | 8.23E-01    |
| AGXT           | 11                 | 0.00        | 0.01      | 9.61E-01    |
| AHCY           | 1                  | 0.00        | 0.01      | 8.07E-01    |
| AHSP           | 9                  | 0.01        | 0.02      | 6.93E-01    |
| AIF1           | 1                  | 0.02        | 0.04      | 6.30E-01    |
| AIFM1          | 2                  | 0.02        | 0.06      | 6.95E-01    |
| AKR1B1         | 2                  | -0.01       | 0.03      | 6.78E-01    |
| AKR1C4         | 1                  | 0.07        | 0.09      | 4.41E-01    |
| AKT1S1         | 3                  | -0.01       | 0.04      | 8.99E-01    |
| AKT3           | 2                  | -0.13       | 0.06      | 3.87E-02    |
| ALCAM          | 11                 | -0.02       | 0.02      | 1.86E-01    |
| ALDH1A1        | 3                  | -0.01       | 0.04      | 7.23E-01    |
| ALDH3A1        | 1                  | -0.02       | 0.01      | 2.92E-02    |
| ALPP           | 11                 | 0.01        | 0.01      | 3.08E-01    |
| AMBP           | 9                  | -0.01       | 0.02      | 6.43E-01    |
| AMIGO2         | 12                 | -0.07       | 0.01      | 1.37E-07    |
| AMN            | 5                  | -0.01       | 0.01      | 4.28E-01    |
| AMY2A          | 8                  | -0.10       | 0.01      | 9.69E-15    |
| AMY2B          | 9                  | -0.07       | 0.01      | 3.08E-12    |
| ANG            | 3                  | 0.03        | 0.01      | 8.59E-03    |
| ANGPT1         | 20                 | -0.02       | 0.01      | 2.13E-01    |
| ANGPT2         | 6                  | 0.03        | 0.02      | 1.15E-01    |
| ANGPTL1        | 6                  | 0.03        | 0.01      | 4.30E-02    |
| ANGPTL2        | 6                  | 0.03        | 0.02      | 2.20E-01    |

|          |    |       |      |          |
|----------|----|-------|------|----------|
| ANGPTL3  | 6  | -0.02 | 0.03 | 4.03E-01 |
| ANGPTL4  | 1  | -0.02 | 0.02 | 3.19E-01 |
| ANGPTL7  | 6  | 0.01  | 0.01 | 4.06E-01 |
| ANKRD54  | 1  | 0.11  | 0.08 | 1.67E-01 |
| ANPEP    | 7  | 0.03  | 0.01 | 2.23E-02 |
| ANXA11   | 3  | -0.06 | 0.05 | 1.92E-01 |
| ANXA3    | 5  | -0.06 | 0.04 | 7.03E-02 |
| ANXA4    | 3  | -0.07 | 0.05 | 1.78E-01 |
| ANXA5    | 1  | 0.05  | 0.04 | 2.72E-01 |
| AOC1     | 1  | 0.00  | 0.02 | 8.60E-01 |
| AOC3     | 10 | 0.00  | 0.01 | 9.55E-01 |
| APBB1IP  | 5  | -0.03 | 0.02 | 1.06E-01 |
| APEX1    | 3  | 0.02  | 0.01 | 1.95E-01 |
| APLP1    | 5  | 0.06  | 0.03 | 3.22E-02 |
| APOH     | 1  | 0.00  | 0.01 | 9.96E-01 |
| APOM     | 9  | 0.02  | 0.01 | 7.80E-02 |
| APP      | 18 | -0.02 | 0.02 | 3.23E-01 |
| APRT     | 6  | -0.04 | 0.03 | 1.19E-01 |
| AREG     | 3  | 0.11  | 0.03 | 6.34E-06 |
| ARG1     | 5  | -0.01 | 0.02 | 5.19E-01 |
| ARHGAP1  | 2  | -0.09 | 0.04 | 4.05E-02 |
| ARHGAP25 | 2  | -0.02 | 0.04 | 5.89E-01 |
| ARSA     | 7  | 0.01  | 0.01 | 1.61E-01 |
| ARSB     | 11 | -0.01 | 0.01 | 3.54E-01 |
| ART3     | 4  | 0.01  | 0.04 | 8.78E-01 |
| ARTN     | 1  | 0.04  | 0.11 | 7.14E-01 |
| ASAH2    | 16 | -0.01 | 0.01 | 1.47E-01 |
| ASGR1    | 7  | -0.02 | 0.02 | 3.85E-01 |
| ATG4A    | 3  | 0.04  | 0.05 | 3.43E-01 |
| ATOX1    | 4  | 0.03  | 0.04 | 4.47E-01 |
| ATP5IF1  | 6  | 0.01  | 0.03 | 6.94E-01 |
| ATP6V1F  | 1  | -0.01 | 0.07 | 8.82E-01 |
| ATXN10   | 5  | -0.02 | 0.03 | 5.22E-01 |
| AXIN1    | 3  | -0.08 | 0.05 | 1.27E-01 |
| AXL      | 9  | -0.02 | 0.02 | 3.24E-01 |
| AZU1     | 3  | -0.08 | 0.05 | 1.17E-01 |
| B4GALT1  | 7  | 0.03  | 0.01 | 2.22E-02 |
| B4GAT1   | 9  | 0.02  | 0.01 | 1.99E-01 |
| BACH1    | 3  | -0.01 | 0.05 | 8.11E-01 |
| BAG3     | 4  | 0.07  | 0.03 | 3.80E-02 |
| BAIAP2   | 6  | 0.00  | 0.03 | 9.13E-01 |
| BAMBI    | 1  | 0.01  | 0.07 | 8.82E-01 |
| BANK1    | 3  | -0.05 | 0.03 | 1.72E-01 |
| BAX      | 2  | -0.07 | 0.06 | 2.44E-01 |
| BCAM     | 15 | 0.01  | 0.01 | 2.06E-01 |
| BCAN     | 7  | 0.02  | 0.02 | 2.48E-01 |
| BCL2L11  | 10 | 0.02  | 0.01 | 1.29E-01 |
| BCR      | 1  | -0.07 | 0.09 | 3.97E-01 |
| BGN      | 11 | 0.05  | 0.02 | 7.55E-03 |
| BID      | 2  | 0.03  | 0.05 | 5.07E-01 |
| BIN2     | 3  | -0.04 | 0.04 | 3.52E-01 |
| BIRC2    | 4  | -0.01 | 0.05 | 9.10E-01 |
| BLMH     | 3  | 0.00  | 0.01 | 7.19E-01 |
| BLVRB    | 2  | 0.00  | 0.02 | 8.86E-01 |
| BMP4     | 6  | 0.01  | 0.03 | 7.47E-01 |
| BMP6     | 16 | -0.04 | 0.01 | 3.84E-03 |
| BOC      | 8  | 0.04  | 0.02 | 2.55E-02 |
| BPIFB1   | 15 | -0.01 | 0.01 | 1.32E-01 |
| BRK1     | 8  | 0.01  | 0.02 | 7.00E-01 |
| BSG      | 10 | -0.14 | 0.02 | 5.50E-13 |

|          |    |       |      |          |
|----------|----|-------|------|----------|
| BST1     | 4  | -0.01 | 0.00 | 2.51E-01 |
| BST2     | 11 | 0.11  | 0.02 | 3.25E-09 |
| BTC      | 5  | 0.00  | 0.01 | 7.70E-01 |
| BTN2A1   | 7  | -0.01 | 0.02 | 4.16E-01 |
| BTN3A2   | 3  | -0.01 | 0.01 | 1.52E-01 |
| C19orf12 | 6  | -0.05 | 0.03 | 7.30E-02 |
| C1QA     | 13 | 0.00  | 0.01 | 7.01E-01 |
| C1QTNF1  | 4  | 0.01  | 0.02 | 7.43E-01 |
| C2       | 2  | 0.04  | 0.04 | 3.47E-01 |
| C2CD2L   | 1  | -0.12 | 0.09 | 1.81E-01 |
| C4BPB    | 11 | 0.00  | 0.01 | 8.23E-01 |
| CA1      | 4  | -0.03 | 0.03 | 2.17E-01 |
| CA11     | 2  | 0.00  | 0.03 | 9.13E-01 |
| CA12     | 7  | 0.03  | 0.01 | 4.72E-02 |
| CA13     | 3  | -0.01 | 0.02 | 6.35E-01 |
| CA14     | 5  | 0.03  | 0.02 | 1.47E-01 |
| CA2      | 2  | 0.01  | 0.04 | 7.42E-01 |
| CA3      | 6  | 0.00  | 0.02 | 8.24E-01 |
| CA4      | 11 | 0.09  | 0.01 | 1.18E-14 |
| CA5A     | 5  | 0.01  | 0.01 | 4.56E-01 |
| CA6      | 12 | -0.02 | 0.01 | 2.05E-03 |
| CA9      | 5  | 0.07  | 0.02 | 2.60E-03 |
| CALB1    | 3  | -0.01 | 0.03 | 6.72E-01 |
| CALCA    | 7  | 0.01  | 0.03 | 6.18E-01 |
| CALCOCO1 | 4  | 0.00  | 0.03 | 9.75E-01 |
| CAMKK1   | 3  | 0.02  | 0.02 | 3.00E-01 |
| CANT1    | 7  | 0.04  | 0.02 | 1.22E-01 |
| CAPG     | 2  | -0.01 | 0.01 | 2.49E-01 |
| CARHSP1  | 1  | 0.01  | 0.06 | 9.10E-01 |
| CASP1    | 1  | 0.00  | 0.02 | 8.94E-01 |
| CASP10   | 3  | -0.07 | 0.02 | 5.18E-03 |
| CASP2    | 2  | -0.01 | 0.05 | 9.02E-01 |
| CASP3    | 2  | 0.05  | 0.04 | 2.09E-01 |
| CASP8    | 4  | -0.03 | 0.02 | 1.81E-01 |
| CBLIF    | 17 | -0.06 | 0.01 | 1.25E-09 |
| CBLN4    | 5  | 0.04  | 0.02 | 4.60E-02 |
| CC2D1A   | 2  | -0.04 | 0.06 | 4.79E-01 |
| CCDC80   | 5  | 0.07  | 0.02 | 1.33E-03 |
| CCL11    | 10 | -0.01 | 0.02 | 5.92E-01 |
| CCL13    | 15 | 0.01  | 0.01 | 2.23E-01 |
| CCL14    | 6  | 0.02  | 0.01 | 7.76E-02 |
| CCL15    | 4  | 0.14  | 0.02 | 1.41E-09 |
| CCL16    | 9  | -0.01 | 0.01 | 3.38E-02 |
| CCL17    | 14 | 0.01  | 0.01 | 3.56E-01 |
| CCL18    | 4  | 0.00  | 0.01 | 7.71E-01 |
| CCL19    | 5  | -0.03 | 0.03 | 3.84E-01 |
| CCL2     | 9  | 0.04  | 0.01 | 3.36E-03 |
| CCL20    | 5  | -0.06 | 0.03 | 2.42E-02 |
| CCL21    | 11 | -0.01 | 0.02 | 6.83E-01 |
| CCL22    | 8  | -0.02 | 0.02 | 4.22E-01 |
| CCL23    | 9  | -0.02 | 0.01 | 3.46E-02 |
| CCL24    | 12 | 0.01  | 0.01 | 2.94E-02 |
| CCL25    | 9  | 0.02  | 0.01 | 1.95E-04 |
| CCL26    | 7  | -0.01 | 0.02 | 5.36E-01 |
| CCL27    | 7  | -0.02 | 0.02 | 3.63E-01 |
| CCL28    | 18 | -0.09 | 0.01 | 1.12E-10 |
| CCL3     | 7  | 0.03  | 0.02 | 8.44E-02 |
| CCL4     | 5  | -0.03 | 0.01 | 3.98E-03 |
| CCL5     | 9  | -0.03 | 0.02 | 4.50E-02 |
| CCL7     | 5  | -0.02 | 0.01 | 7.78E-02 |

|         |    |       |      |          |
|---------|----|-------|------|----------|
| CCL8    | 11 | 0.00  | 0.01 | 9.38E-01 |
| CCN1    | 11 | -0.02 | 0.02 | 2.25E-01 |
| CCN2    | 18 | -0.02 | 0.01 | 1.41E-01 |
| CCN3    | 3  | 0.00  | 0.02 | 9.15E-01 |
| CCN4    | 12 | -0.02 | 0.01 | 3.03E-02 |
| CCN5    | 1  | 0.06  | 0.10 | 5.64E-01 |
| CCS     | 1  | 0.00  | 0.01 | 6.06E-01 |
| CD109   | 6  | -0.25 | 0.02 | 4.95E-34 |
| CD14    | 6  | -0.04 | 0.01 | 7.71E-03 |
| CD160   | 14 | -0.01 | 0.01 | 6.28E-01 |
| CD163   | 18 | 0.01  | 0.01 | 2.27E-01 |
| CD164   | 10 | -0.01 | 0.02 | 5.22E-01 |
| CD177   | 3  | 0.01  | 0.01 | 4.79E-01 |
| CD1C    | 18 | -0.01 | 0.01 | 5.24E-01 |
| CD200   | 8  | 0.03  | 0.02 | 1.23E-01 |
| CD200R1 | 10 | 0.00  | 0.01 | 9.76E-01 |
| CD207   | 15 | -0.01 | 0.01 | 2.65E-01 |
| CD209   | 8  | 0.10  | 0.01 | 6.46E-73 |
| CD22    | 20 | -0.01 | 0.01 | 4.39E-01 |
| CD244   | 14 | -0.03 | 0.01 | 2.61E-02 |
| CD27    | 7  | 0.00  | 0.02 | 7.70E-01 |
| CD274   | 7  | 0.00  | 0.01 | 8.96E-01 |
| CD276   | 7  | 0.00  | 0.01 | 9.73E-01 |
| CD28    | 12 | 0.05  | 0.01 | 5.07E-04 |
| CD2AP   | 1  | -0.01 | 0.07 | 8.82E-01 |
| CD300C  | 14 | 0.02  | 0.01 | 1.03E-01 |
| CD300E  | 10 | -0.02 | 0.01 | 1.66E-01 |
| CD300LF | 9  | 0.01  | 0.00 | 8.62E-02 |
| CD300LG | 12 | 0.03  | 0.01 | 9.17E-03 |
| CD302   | 7  | 0.01  | 0.01 | 4.16E-01 |
| CD33    | 7  | 0.00  | 0.00 | 5.99E-01 |
| CD34    | 3  | -0.16 | 0.01 | 6.89E-43 |
| CD38    | 2  | -0.03 | 0.01 | 3.10E-02 |
| CD4     | 4  | -0.01 | 0.01 | 3.50E-01 |
| CD40    | 10 | -0.01 | 0.01 | 1.93E-01 |
| CD40LG  | 12 | 0.01  | 0.02 | 7.13E-01 |
| CD46    | 7  | -0.13 | 0.03 | 4.56E-07 |
| CD48    | 13 | -0.01 | 0.01 | 2.03E-01 |
| CD5     | 8  | -0.03 | 0.02 | 1.37E-01 |
| CD55    | 6  | 0.02  | 0.01 | 4.20E-02 |
| CD58    | 12 | -0.11 | 0.01 | 2.68E-31 |
| CD59    | 5  | 0.04  | 0.02 | 3.39E-02 |
| CD6     | 11 | -0.01 | 0.01 | 1.36E-01 |
| CD63    | 10 | -0.02 | 0.02 | 1.93E-01 |
| CD69    | 7  | -0.05 | 0.02 | 3.39E-02 |
| CD70    | 4  | 0.00  | 0.01 | 5.46E-01 |
| CD74    | 6  | -0.03 | 0.02 | 9.59E-02 |
| CD79B   | 17 | -0.11 | 0.01 | 5.08E-16 |
| CD83    | 14 | -0.04 | 0.02 | 1.74E-02 |
| CD84    | 11 | 0.00  | 0.02 | 9.35E-01 |
| CD8A    | 5  | 0.01  | 0.01 | 5.27E-01 |
| CD93    | 6  | 0.00  | 0.03 | 9.92E-01 |
| CD99    | 4  | 0.03  | 0.03 | 3.06E-01 |
| CD99L2  | 9  | 0.01  | 0.02 | 7.79E-01 |
| CDC27   | 2  | -0.03 | 0.05 | 5.63E-01 |
| CDC37   | 3  | 0.04  | 0.05 | 4.62E-01 |
| CDCP1   | 8  | -0.03 | 0.02 | 4.52E-02 |
| CDH1    | 6  | -0.01 | 0.01 | 2.84E-01 |
| CDH15   | 4  | 0.03  | 0.01 | 4.84E-02 |
| CDH17   | 12 | -0.05 | 0.01 | 1.11E-10 |

|               |    |       |      |          |
|---------------|----|-------|------|----------|
| CDH2          | 13 | -0.01 | 0.02 | 5.24E-01 |
| CDH3          | 7  | -0.05 | 0.03 | 4.75E-02 |
| CDH5          | 12 | 0.02  | 0.01 | 3.64E-04 |
| CDH6          | 6  | 0.00  | 0.01 | 7.34E-01 |
| CDHR1         | 4  | 0.02  | 0.02 | 2.61E-01 |
| CDHR2         | 8  | 0.06  | 0.03 | 2.68E-02 |
| CDHR5         | 8  | -0.02 | 0.01 | 1.68E-02 |
| CDKN1A        | 6  | 0.01  | 0.02 | 5.48E-01 |
| CDKN2D        | 5  | 0.02  | 0.03 | 5.29E-01 |
| CDNF          | 1  | 0.00  | 0.01 | 7.75E-01 |
| CDON          | 4  | 0.01  | 0.03 | 6.65E-01 |
| CDSN          | 18 | 0.00  | 0.01 | 7.25E-01 |
| CEACAM1       | 6  | -0.01 | 0.02 | 3.38E-01 |
| CEACAM21      | 2  | -0.19 | 0.09 | 3.32E-02 |
| CEACAM3       | 1  | 0.03  | 0.09 | 7.47E-01 |
| CEACAM5       | 13 | -0.02 | 0.01 | 7.01E-02 |
| CEACAM8       | 12 | 0.00  | 0.02 | 8.97E-01 |
| CEBPB         | 3  | -0.06 | 0.05 | 2.09E-01 |
| CELA3A        | 16 | 0.00  | 0.01 | 7.19E-01 |
| CEP20         | 5  | 0.00  | 0.03 | 9.11E-01 |
| CEP43         | 6  | -0.03 | 0.03 | 4.08E-01 |
| CEP85         | 3  | 0.01  | 0.03 | 7.78E-01 |
| CERT          | 4  | 0.01  | 0.04 | 6.88E-01 |
| CES1          | 18 | 0.01  | 0.01 | 3.93E-01 |
| CES2          | 2  | -0.07 | 0.04 | 1.33E-01 |
| CES3          | 9  | -0.01 | 0.02 | 5.62E-01 |
| CETN2         | 3  | 0.01  | 0.04 | 7.74E-01 |
| CFC1          | 7  | 0.00  | 0.03 | 9.74E-01 |
| CGA           | 1  | -0.07 | 0.12 | 5.32E-01 |
| CGREF1        | 3  | 0.02  | 0.01 | 3.61E-02 |
| CHAC2         | 2  | 0.02  | 0.04 | 6.35E-01 |
| CHGB          | 6  | -0.01 | 0.01 | 4.28E-01 |
| CHI3L1        | 7  | 0.01  | 0.01 | 3.49E-01 |
| CHIT1         | 5  | 0.00  | 0.01 | 5.72E-01 |
| CHL1          | 6  | -0.01 | 0.01 | 4.79E-01 |
| CHMP1A        | 4  | -0.08 | 0.04 | 2.98E-02 |
| CHRDL1        | 4  | -0.01 | 0.05 | 7.96E-01 |
| CHRDL2        | 5  | 0.02  | 0.02 | 4.56E-01 |
| CIAPIN1       | 4  | -0.02 | 0.04 | 6.93E-01 |
| CKAP4         | 4  | -0.03 | 0.01 | 1.85E-02 |
| CKMT1A_CKMT1B | 8  | 0.14  | 0.02 | 6.18E-10 |
| CLC           | 10 | 0.06  | 0.02 | 3.29E-03 |
| CLEC10A       | 9  | 0.00  | 0.01 | 6.16E-01 |
| CLEC11A       | 8  | 0.01  | 0.02 | 5.51E-01 |
| CLEC14A       | 9  | -0.15 | 0.01 | 6.02E-29 |
| CLEC1A        | 7  | 0.02  | 0.01 | 1.87E-02 |
| CLEC1B        | 9  | 0.00  | 0.02 | 7.85E-01 |
| CLEC4A        | 12 | 0.01  | 0.01 | 1.84E-01 |
| CLEC4C        | 25 | 0.00  | 0.01 | 9.89E-01 |
| CLEC4D        | 10 | 0.00  | 0.01 | 5.62E-01 |
| CLEC4G        | 12 | 0.15  | 0.01 | 4.94E-40 |
| CLEC5A        | 11 | 0.01  | 0.01 | 4.41E-01 |
| CLEC6A        | 13 | 0.00  | 0.01 | 6.86E-01 |
| CLEC7A        | 4  | 0.00  | 0.01 | 7.17E-01 |
| CLIP2         | 2  | -0.01 | 0.03 | 7.52E-01 |
| CLMP          | 4  | 0.02  | 0.01 | 1.52E-01 |
| CLPS          | 7  | -0.02 | 0.01 | 6.69E-03 |
| CLSPN         | 1  | 0.02  | 0.05 | 6.24E-01 |
| CLSTN2        | 4  | 0.04  | 0.01 | 6.82E-03 |
| CLTA          | 1  | 0.00  | 0.04 | 9.55E-01 |

|         |    |       |      |          |
|---------|----|-------|------|----------|
| CLUL1   | 9  | 0.01  | 0.01 | 2.63E-01 |
| CNDP1   | 8  | -0.02 | 0.01 | 7.99E-02 |
| CNPY2   | 1  | -0.06 | 0.04 | 1.03E-01 |
| CNPY4   | 3  | 0.01  | 0.02 | 7.52E-01 |
| CNST    | 4  | -0.07 | 0.05 | 1.11E-01 |
| CNTN1   | 8  | 0.03  | 0.01 | 3.92E-02 |
| CNTN2   | 6  | 0.02  | 0.01 | 2.12E-02 |
| CNTN3   | 16 | -0.01 | 0.01 | 3.51E-01 |
| CNTN4   | 10 | -0.01 | 0.01 | 6.27E-01 |
| CNTN5   | 7  | -0.01 | 0.01 | 3.06E-01 |
| CNTNAP2 | 4  | 0.02  | 0.01 | 7.03E-02 |
| COL18A1 | 4  | -0.02 | 0.02 | 3.26E-01 |
| COL1A1  | 10 | -0.05 | 0.02 | 7.61E-03 |
| COL4A1  | 9  | 0.00  | 0.01 | 9.54E-01 |
| COL6A3  | 4  | -0.03 | 0.04 | 3.65E-01 |
| COL9A1  | 4  | 0.00  | 0.03 | 9.79E-01 |
| COLEC12 | 4  | -0.02 | 0.04 | 6.11E-01 |
| COMP    | 6  | 0.00  | 0.02 | 8.21E-01 |
| COMT    | 2  | -0.01 | 0.01 | 1.87E-01 |
| CORO1A  | 3  | 0.03  | 0.05 | 5.51E-01 |
| COX5B   | 4  | -0.05 | 0.04 | 1.94E-01 |
| CPA1    | 21 | 0.02  | 0.01 | 5.06E-02 |
| CPA2    | 4  | 0.00  | 0.01 | 8.93E-01 |
| CPB1    | 14 | 0.00  | 0.01 | 8.67E-01 |
| CPE     | 7  | -0.05 | 0.02 | 1.20E-03 |
| CPM     | 11 | -0.02 | 0.02 | 4.01E-01 |
| CPPED1  | 1  | 0.00  | 0.01 | 8.81E-01 |
| CPVL    | 12 | 0.01  | 0.01 | 1.25E-01 |
| CPXM1   | 19 | -0.01 | 0.01 | 1.61E-01 |
| CR2     | 24 | -0.01 | 0.01 | 5.76E-01 |
| CRACR2A | 4  | -0.03 | 0.03 | 3.45E-01 |
| CRADD   | 5  | -0.02 | 0.04 | 5.68E-01 |
| CREG1   | 12 | 0.04  | 0.02 | 1.53E-02 |
| CRELD2  | 12 | 0.00  | 0.01 | 9.39E-01 |
| CRH     | 22 | 0.01  | 0.01 | 3.88E-01 |
| CRHBP   | 5  | -0.01 | 0.01 | 4.82E-01 |
| CRIM1   | 4  | -0.14 | 0.04 | 9.95E-05 |
| CRIP2   | 4  | 0.18  | 0.03 | 1.74E-11 |
| CRISP2  | 13 | -0.01 | 0.01 | 3.75E-01 |
| CRKL    | 1  | -0.08 | 0.07 | 2.63E-01 |
| CRLF1   | 8  | -0.04 | 0.03 | 2.40E-01 |
| CRNN    | 3  | 0.01  | 0.01 | 7.08E-02 |
| CRTAC1  | 2  | 0.00  | 0.01 | 5.12E-01 |
| CRTAM   | 14 | -0.01 | 0.01 | 6.78E-01 |
| CSF1    | 3  | -0.05 | 0.02 | 3.49E-02 |
| CSF2RA  | 1  | 0.03  | 0.09 | 7.34E-01 |
| CSF3    | 3  | 0.09  | 0.03 | 4.82E-04 |
| CST3    | 6  | 0.01  | 0.02 | 6.09E-01 |
| CST5    | 13 | 0.01  | 0.01 | 3.93E-01 |
| CST6    | 15 | -0.01 | 0.01 | 4.18E-01 |
| CST7    | 11 | 0.00  | 0.01 | 4.84E-01 |
| CTF1    | 2  | 0.00  | 0.06 | 9.93E-01 |
| CTRB1   | 13 | -0.02 | 0.01 | 6.93E-03 |
| CTRC    | 12 | 0.01  | 0.01 | 3.60E-01 |
| CTSB    | 7  | 0.00  | 0.01 | 7.42E-01 |
| CTSC    | 7  | 0.00  | 0.01 | 5.69E-01 |
| CTSD    | 6  | 0.00  | 0.01 | 8.53E-01 |
| CTSF    | 15 | 0.00  | 0.01 | 9.41E-01 |
| CTSH    | 1  | 0.00  | 0.05 | 9.63E-01 |
| CTSL    | 17 | 0.01  | 0.01 | 3.26E-01 |



|               |    |       |      |          |
|---------------|----|-------|------|----------|
| CTSO          | 10 | 0.01  | 0.02 | 5.02E-01 |
| CTSS          | 7  | -0.27 | 0.03 | 1.74E-25 |
| CTSV          | 18 | -0.04 | 0.01 | 2.85E-03 |
| CTSZ          | 11 | -0.01 | 0.01 | 3.10E-01 |
| CX3CL1        | 8  | -0.30 | 0.03 | 1.35E-29 |
| CXADR         | 5  | 0.11  | 0.02 | 1.21E-08 |
| CXCL1         | 4  | 0.01  | 0.01 | 2.35E-01 |
| CXCL10        | 4  | 0.00  | 0.01 | 8.23E-01 |
| CXCL11        | 9  | -0.04 | 0.02 | 2.17E-02 |
| CXCL12        | 10 | -0.05 | 0.02 | 1.20E-02 |
| CXCL13        | 8  | -0.02 | 0.03 | 4.51E-01 |
| CXCL14        | 2  | 0.00  | 0.05 | 9.45E-01 |
| CXCL16        | 12 | 0.02  | 0.02 | 2.78E-01 |
| CXCL17        | 6  | -0.06 | 0.03 | 7.27E-02 |
| CXCL3         | 3  | 0.05  | 0.04 | 2.34E-01 |
| CXCL5         | 11 | 0.00  | 0.01 | 9.84E-01 |
| CXCL6         | 7  | -0.02 | 0.01 | 3.48E-02 |
| CXCL8         | 9  | 0.03  | 0.02 | 1.31E-01 |
| CXCL9         | 5  | -0.01 | 0.02 | 7.76E-01 |
| DAB2          | 4  | -0.06 | 0.04 | 1.36E-01 |
| DAG1          | 3  | -0.02 | 0.05 | 7.73E-01 |
| DAPP1         | 2  | 0.02  | 0.04 | 5.71E-01 |
| DARS1         | 6  | -0.01 | 0.03 | 7.41E-01 |
| DBI           | 4  | 0.03  | 0.02 | 8.42E-02 |
| DBNL          | 4  | -0.01 | 0.04 | 8.42E-01 |
| DCBLD2        | 16 | -0.03 | 0.01 | 6.08E-02 |
| DCN           | 1  | -0.04 | 0.08 | 6.28E-01 |
| DCTN1         | 2  | 0.01  | 0.06 | 9.17E-01 |
| DCTN2         | 2  | 0.03  | 0.07 | 6.67E-01 |
| DCTPP1        | 6  | -0.01 | 0.03 | 7.63E-01 |
| DCXR          | 6  | 0.01  | 0.03 | 6.92E-01 |
| DDAH1         | 5  | -0.01 | 0.02 | 8.08E-01 |
| DDC           | 7  | 0.00  | 0.01 | 9.79E-01 |
| DDR1          | 12 | 0.00  | 0.01 | 8.64E-01 |
| DDX58         | 1  | -0.02 | 0.02 | 2.73E-01 |
| DECR1         | 3  | -0.05 | 0.04 | 2.28E-01 |
| DEFA1_DEFA1B  | 16 | 0.01  | 0.02 | 4.50E-01 |
| DEFB4A_DEFB4B | 4  | -0.02 | 0.04 | 5.69E-01 |
| DFFA          | 1  | -0.01 | 0.07 | 8.82E-01 |
| DIABLO        | 3  | -0.13 | 0.05 | 1.41E-02 |
| DKK1          | 12 | -0.01 | 0.02 | 4.01E-01 |
| DKK3          | 8  | -0.04 | 0.01 | 1.04E-03 |
| DKK4          | 6  | 0.01  | 0.02 | 3.98E-01 |
| DKKL1         | 5  | 0.00  | 0.00 | 3.29E-01 |
| DLK1          | 7  | 0.00  | 0.01 | 7.15E-01 |
| DLL1          | 7  | 0.05  | 0.02 | 8.26E-03 |
| DNAJA2        | 1  | 0.06  | 0.08 | 4.52E-01 |
| DNAJB1        | 7  | -0.02 | 0.03 | 5.66E-01 |
| DNAJB8        | 2  | -0.05 | 0.05 | 3.41E-01 |
| DNER          | 7  | -0.01 | 0.02 | 5.13E-01 |
| DNMBP         | 4  | -0.04 | 0.03 | 2.36E-01 |
| DNPH1         | 1  | -0.01 | 0.02 | 5.96E-01 |
| DOK2          | 4  | -0.03 | 0.04 | 3.93E-01 |
| DPEP1         | 8  | 0.01  | 0.01 | 6.38E-02 |
| DPEP2         | 3  | -0.01 | 0.02 | 7.95E-01 |
| DPP10         | 5  | -0.08 | 0.02 | 5.31E-08 |
| DPP4          | 5  | 0.00  | 0.02 | 8.14E-01 |
| DPP6          | 7  | -0.07 | 0.01 | 7.91E-07 |
| DPP7          | 7  | 0.00  | 0.02 | 8.58E-01 |
| DPT           | 2  | 0.00  | 0.01 | 7.65E-01 |

|           |    |       |      |          |
|-----------|----|-------|------|----------|
| DPY30     | 2  | -0.01 | 0.06 | 8.96E-01 |
| DRAXIN    | 17 | -0.06 | 0.01 | 5.43E-06 |
| DRG2      | 4  | 0.01  | 0.03 | 6.87E-01 |
| DSC2      | 9  | 0.02  | 0.01 | 1.46E-01 |
| DSG2      | 10 | 0.03  | 0.01 | 2.34E-02 |
| DSG3      | 17 | 0.00  | 0.01 | 8.77E-01 |
| DSG4      | 22 | -0.04 | 0.01 | 8.05E-03 |
| DTX3      | 3  | -0.03 | 0.02 | 2.91E-01 |
| DUSP3     | 1  | -0.06 | 0.07 | 4.49E-01 |
| EBAG9     | 5  | 0.02  | 0.03 | 5.28E-01 |
| EBI3_IL27 | 21 | -0.02 | 0.01 | 7.75E-02 |
| ECE1      | 5  | 0.02  | 0.03 | 4.13E-01 |
| EDA2R     | 3  | 0.05  | 0.06 | 3.89E-01 |
| EDAR      | 23 | 0.00  | 0.01 | 8.14E-01 |
| EDIL3     | 3  | -0.01 | 0.03 | 8.45E-01 |
| EFEMP1    | 4  | -0.02 | 0.02 | 3.42E-01 |
| EFNA1     | 4  | 0.09  | 0.01 | 3.67E-11 |
| EFNA4     | 5  | -0.03 | 0.03 | 2.61E-01 |
| EGF       | 11 | -0.02 | 0.02 | 2.51E-01 |
| EGFL7     | 18 | -0.02 | 0.01 | 1.91E-01 |
| EGFR      | 6  | 0.00  | 0.02 | 9.66E-01 |
| EGLN1     | 4  | 0.03  | 0.03 | 2.68E-01 |
| EIF4B     | 4  | -0.02 | 0.04 | 6.37E-01 |
| EIF4G1    | 3  | -0.01 | 0.04 | 8.05E-01 |
| ELOA      | 2  | 0.01  | 0.03 | 6.91E-01 |
| ENAH      | 1  | -0.01 | 0.04 | 7.75E-01 |
| ENG       | 8  | -0.09 | 0.01 | 3.68E-25 |
| ENO1      | 4  | 0.04  | 0.03 | 1.41E-01 |
| ENO2      | 5  | -0.02 | 0.02 | 3.07E-01 |
| ENPP2     | 8  | -0.03 | 0.02 | 1.29E-01 |
| ENPP5     | 7  | 0.00  | 0.01 | 8.79E-01 |
| ENPP7     | 6  | 0.00  | 0.01 | 9.48E-01 |
| ENTPD2    | 2  | 0.20  | 0.07 | 4.16E-03 |
| ENTPD5    | 9  | -0.02 | 0.01 | 3.81E-02 |
| ENTPD6    | 9  | 0.02  | 0.01 | 5.92E-05 |
| EPCAM     | 14 | 0.05  | 0.01 | 3.90E-05 |
| EPHA1     | 7  | -0.03 | 0.02 | 1.71E-01 |
| EPHA2     | 6  | 0.04  | 0.02 | 7.30E-02 |
| EPHB4     | 10 | -0.12 | 0.01 | 2.51E-23 |
| EPHB6     | 4  | -0.03 | 0.02 | 1.02E-01 |
| EPO       | 9  | 0.05  | 0.02 | 5.81E-03 |
| EPS8L2    | 4  | 0.01  | 0.02 | 3.67E-01 |
| ERBB2     | 9  | 0.03  | 0.02 | 2.03E-01 |
| ERBB3     | 9  | 0.00  | 0.01 | 8.94E-01 |
| ERBB4     | 17 | -0.09 | 0.01 | 3.41E-11 |
| ERBIN     | 3  | 0.05  | 0.05 | 2.80E-01 |
| EREG      | 10 | -0.03 | 0.02 | 1.58E-01 |
| ERP44     | 6  | 0.00  | 0.01 | 6.44E-01 |
| ESAM      | 8  | -0.01 | 0.02 | 6.33E-01 |
| ESM1      | 11 | -0.04 | 0.02 | 5.18E-02 |
| EZR       | 3  | -0.05 | 0.05 | 2.35E-01 |
| F11R      | 12 | 0.00  | 0.02 | 9.92E-01 |
| F2R       | 8  | -0.10 | 0.02 | 1.01E-06 |
| F3        | 9  | -0.03 | 0.01 | 7.32E-03 |
| F7        | 7  | 0.00  | 0.01 | 7.15E-01 |
| F9        | 2  | 0.02  | 0.04 | 5.80E-01 |
| FABP1     | 2  | 0.00  | 0.02 | 9.11E-01 |
| FABP2     | 5  | 0.07  | 0.02 | 8.88E-04 |
| FABP4     | 2  | 0.03  | 0.05 | 5.27E-01 |
| FABP5     | 2  | 0.00  | 0.04 | 9.72E-01 |

|           |    |       |      |          |
|-----------|----|-------|------|----------|
| FABP6     | 4  | 0.02  | 0.02 | 1.89E-01 |
| FABP9     | 17 | 0.01  | 0.01 | 3.90E-01 |
| FADD      | 4  | -0.01 | 0.04 | 8.02E-01 |
| FAM3B     | 7  | -0.02 | 0.01 | 8.44E-03 |
| FAM3C     | 2  | -0.06 | 0.05 | 2.33E-01 |
| FAP       | 7  | 0.00  | 0.02 | 7.61E-01 |
| FAS       | 4  | 0.00  | 0.02 | 9.02E-01 |
| FASLG     | 21 | -0.01 | 0.01 | 3.14E-01 |
| FBP1      | 5  | 0.00  | 0.02 | 8.51E-01 |
| FCAR      | 14 | -0.01 | 0.01 | 1.31E-01 |
| FCER2     | 14 | 0.00  | 0.01 | 7.86E-01 |
| FCGR2A    | 5  | 0.00  | 0.00 | 5.78E-01 |
| FCGR2B    | 4  | -0.07 | 0.01 | 1.94E-12 |
| FCGR3B    | 11 | -0.01 | 0.01 | 5.51E-01 |
| FCN2      | 11 | 0.00  | 0.01 | 7.92E-01 |
| FCRL1     | 26 | -0.02 | 0.01 | 1.36E-02 |
| FCRL2     | 16 | -0.01 | 0.01 | 4.83E-01 |
| FCRL3     | 5  | -0.01 | 0.00 | 8.68E-02 |
| FCRL5     | 10 | 0.05  | 0.02 | 1.56E-02 |
| FCRL6     | 6  | -0.01 | 0.01 | 1.44E-01 |
| FCRLB     | 7  | -0.01 | 0.01 | 3.34E-01 |
| FEN1      | 1  | 0.04  | 0.09 | 6.61E-01 |
| FES       | 1  | -0.02 | 0.03 | 6.57E-01 |
| FETUB     | 4  | -0.01 | 0.01 | 3.15E-01 |
| FGF19     | 5  | 0.14  | 0.02 | 5.58E-17 |
| FGF2      | 6  | 0.00  | 0.01 | 5.53E-01 |
| FGF21     | 7  | -0.02 | 0.02 | 4.08E-01 |
| FGF23     | 6  | 0.12  | 0.02 | 2.42E-06 |
| FGF5      | 2  | -0.01 | 0.01 | 2.80E-01 |
| FGFBP1    | 13 | 0.01  | 0.02 | 5.45E-01 |
| FGFR2     | 8  | 0.14  | 0.03 | 4.51E-08 |
| FGR       | 1  | -0.02 | 0.06 | 7.43E-01 |
| FHIT      | 2  | -0.07 | 0.04 | 1.12E-01 |
| FIS1      | 5  | -0.03 | 0.02 | 2.13E-01 |
| FKBP1B    | 5  | -0.01 | 0.02 | 7.48E-01 |
| FKBP4     | 6  | -0.05 | 0.03 | 1.30E-01 |
| FKBP5     | 5  | -0.04 | 0.02 | 8.35E-02 |
| FLI1      | 3  | -0.08 | 0.04 | 7.14E-02 |
| FLRT2     | 11 | 0.00  | 0.01 | 7.75E-01 |
| FLT1      | 9  | -0.06 | 0.01 | 1.87E-07 |
| FLT3      | 6  | 0.01  | 0.03 | 8.14E-01 |
| FLT3LG    | 20 | 0.02  | 0.01 | 1.30E-01 |
| FLT4      | 12 | -0.03 | 0.01 | 4.83E-07 |
| FOLR1     | 8  | -0.12 | 0.02 | 2.35E-08 |
| FOLR2     | 14 | 0.02  | 0.01 | 1.40E-01 |
| FOLR3     | 10 | 0.00  | 0.02 | 9.57E-01 |
| FOXO1     | 4  | 0.03  | 0.03 | 2.13E-01 |
| FOXO3     | 1  | 0.06  | 0.09 | 4.98E-01 |
| FRZB      | 4  | 0.00  | 0.01 | 8.05E-01 |
| FST       | 3  | 0.01  | 0.02 | 6.51E-01 |
| FSTL3     | 2  | -0.06 | 0.05 | 1.75E-01 |
| FUCA1     | 5  | 0.00  | 0.00 | 7.28E-01 |
| FURIN     | 3  | 0.01  | 0.02 | 7.47E-01 |
| FUS       | 2  | 0.01  | 0.05 | 7.79E-01 |
| FUT3_FUT5 | 14 | 0.00  | 0.01 | 8.42E-01 |
| FUT8      | 12 | 0.01  | 0.01 | 8.08E-02 |
| FXN       | 4  | -0.07 | 0.05 | 1.16E-01 |
| FXYD5     | 3  | -0.02 | 0.02 | 3.16E-01 |
| FYB1      | 2  | -0.02 | 0.05 | 7.19E-01 |
| GAL       | 22 | 0.02  | 0.01 | 1.30E-01 |

|         |    |       |      |          |
|---------|----|-------|------|----------|
| GALNT10 | 9  | -0.01 | 0.01 | 2.51E-01 |
| GALNT2  | 6  | 0.03  | 0.01 | 6.10E-02 |
| GALNT3  | 9  | 0.01  | 0.01 | 4.82E-01 |
| GALNT7  | 8  | 0.00  | 0.01 | 7.45E-01 |
| GAS6    | 17 | -0.02 | 0.01 | 9.18E-02 |
| GBP2    | 1  | -0.08 | 0.04 | 7.81E-02 |
| GBP4    | 1  | 0.00  | 0.01 | 8.83E-01 |
| GCG     | 5  | 0.03  | 0.04 | 3.83E-01 |
| GCNT1   | 8  | 0.03  | 0.01 | 6.31E-03 |
| GDF15   | 1  | 0.02  | 0.02 | 2.43E-01 |
| GDF2    | 14 | 0.01  | 0.01 | 4.39E-01 |
| GDNF    | 2  | 0.03  | 0.02 | 1.83E-01 |
| GFAP    | 8  | -0.03 | 0.03 | 2.70E-01 |
| GFER    | 1  | -0.05 | 0.08 | 4.98E-01 |
| GFRA1   | 4  | 0.06  | 0.02 | 4.13E-04 |
| GFRA2   | 7  | 0.03  | 0.01 | 3.39E-02 |
| GFRA3   | 22 | 0.00  | 0.01 | 8.48E-01 |
| GGH     | 11 | 0.00  | 0.01 | 8.72E-01 |
| GGT1    | 7  | -0.01 | 0.02 | 5.87E-01 |
| GGT5    | 4  | 0.00  | 0.02 | 7.97E-01 |
| GHRL    | 11 | 0.00  | 0.01 | 7.69E-01 |
| GKN1    | 4  | 0.27  | 0.04 | 4.64E-14 |
| GLB1    | 10 | 0.00  | 0.01 | 9.15E-01 |
| GLO1    | 1  | -0.01 | 0.01 | 6.46E-01 |
| GLOD4   | 2  | -0.05 | 0.06 | 3.88E-01 |
| GLRX    | 2  | 0.00  | 0.01 | 7.16E-01 |
| GLT8D2  | 1  | -0.02 | 0.03 | 3.77E-01 |
| GMPR    | 2  | 0.00  | 0.02 | 8.86E-01 |
| GNE     | 3  | -0.04 | 0.03 | 2.66E-01 |
| GNLY    | 12 | 0.00  | 0.01 | 5.46E-01 |
| GOLM2   | 8  | 0.15  | 0.01 | 2.00E-33 |
| GOPC    | 2  | -0.04 | 0.05 | 4.46E-01 |
| GP1BA   | 17 | -0.04 | 0.01 | 8.60E-03 |
| GP2     | 8  | 0.11  | 0.01 | 1.29E-46 |
| GP6     | 6  | -0.01 | 0.01 | 3.31E-01 |
| GPA33   | 14 | 0.04  | 0.01 | 1.84E-04 |
| GPC1    | 17 | -0.02 | 0.01 | 1.27E-01 |
| GPC5    | 10 | -0.01 | 0.01 | 3.15E-01 |
| GPNMB   | 6  | -0.01 | 0.01 | 4.53E-01 |
| GPR37   | 10 | 0.00  | 0.01 | 7.18E-01 |
| GRAP2   | 3  | -0.01 | 0.05 | 7.58E-01 |
| GRK5    | 1  | 0.02  | 0.02 | 2.64E-01 |
| GRN     | 12 | -0.01 | 0.01 | 2.17E-01 |
| GRPEL1  | 3  | 0.07  | 0.04 | 8.46E-02 |
| GSAP    | 1  | 0.01  | 0.07 | 9.01E-01 |
| GSTA1   | 9  | 0.00  | 0.01 | 7.98E-01 |
| GSTA3   | 5  | 0.00  | 0.01 | 7.98E-01 |
| GSTP1   | 1  | -0.01 | 0.02 | 5.53E-01 |
| GUCA2A  | 7  | 0.00  | 0.02 | 8.96E-01 |
| GUSB    | 14 | 0.00  | 0.01 | 7.50E-01 |
| GYS1    | 3  | 0.03  | 0.02 | 1.49E-01 |
| GZMA    | 16 | -0.03 | 0.01 | 3.52E-02 |
| GZMB    | 10 | -0.01 | 0.01 | 7.01E-01 |
| GZMH    | 9  | -0.02 | 0.02 | 3.59E-01 |
| HAGH    | 1  | -0.03 | 0.05 | 5.40E-01 |
| HAO1    | 9  | 0.03  | 0.03 | 2.74E-01 |
| HARS1   | 3  | -0.01 | 0.05 | 8.52E-01 |
| HAVCR1  | 8  | -0.01 | 0.01 | 4.50E-01 |
| HAVCR2  | 8  | 0.00  | 0.02 | 8.70E-01 |
| HBEGF   | 24 | -0.01 | 0.01 | 5.84E-01 |

|             |    |       |      |          |
|-------------|----|-------|------|----------|
| HBQ1        | 2  | 0.02  | 0.01 | 1.14E-01 |
| HCLS1       | 4  | 0.01  | 0.03 | 8.80E-01 |
| HDGF        | 2  | 0.00  | 0.00 | 2.54E-01 |
| HEBP1       | 1  | -0.01 | 0.04 | 7.68E-01 |
| HEXIM1      | 5  | -0.04 | 0.03 | 1.80E-01 |
| HGF         | 5  | -0.07 | 0.02 | 4.96E-03 |
| HGS         | 4  | -0.01 | 0.04 | 8.56E-01 |
| HLA-DRA     | 3  | 0.00  | 0.01 | 9.51E-01 |
| HLA-E       | 4  | 0.00  | 0.01 | 9.17E-01 |
| HMBS        | 1  | -0.05 | 0.04 | 2.08E-01 |
| HMOX1       | 19 | -0.02 | 0.01 | 6.06E-02 |
| HMOX2       | 4  | -0.06 | 0.03 | 2.50E-02 |
| HNMT        | 4  | 0.01  | 0.01 | 1.39E-01 |
| HNRNPK      | 1  | -0.09 | 0.08 | 2.63E-01 |
| HPCAL1      | 1  | -0.03 | 0.05 | 4.84E-01 |
| HPGDS       | 2  | 0.00  | 0.01 | 7.71E-01 |
| HS3ST3B1    | 10 | -0.01 | 0.01 | 2.23E-01 |
| HS6ST1      | 17 | 0.00  | 0.01 | 9.99E-01 |
| HSD11B1     | 12 | 0.00  | 0.01 | 7.87E-01 |
| HSPA1A      | 3  | -0.03 | 0.04 | 4.59E-01 |
| HSPB1       | 5  | 0.02  | 0.03 | 4.90E-01 |
| HSPB6       | 5  | -0.02 | 0.04 | 6.23E-01 |
| HSPG2       | 4  | -0.01 | 0.03 | 7.31E-01 |
| HTRA2       | 1  | -0.10 | 0.09 | 2.63E-01 |
| HYAL1       | 4  | -0.01 | 0.02 | 3.97E-01 |
| HYOU1       | 13 | -0.02 | 0.02 | 2.16E-01 |
| ICA1        | 3  | -0.04 | 0.02 | 7.54E-02 |
| ICAM1       | 6  | -0.03 | 0.01 | 4.61E-03 |
| ICAM2       | 10 | -0.05 | 0.00 | 3.93E-23 |
| ICAM3       | 21 | -0.02 | 0.01 | 6.73E-03 |
| ICAM4       | 14 | 0.01  | 0.01 | 7.23E-01 |
| ICAM5       | 7  | -0.05 | 0.01 | 1.22E-14 |
| ICOSLG      | 4  | 0.00  | 0.01 | 9.89E-01 |
| IDI2        | 1  | 0.01  | 0.01 | 3.96E-01 |
| IDS         | 3  | -0.11 | 0.02 | 1.06E-07 |
| IDUA        | 13 | 0.02  | 0.01 | 3.17E-02 |
| IFNG        | 2  | -0.12 | 0.07 | 8.11E-02 |
| IFNGR1      | 10 | 0.02  | 0.01 | 1.24E-01 |
| IFNGR2      | 10 | 0.00  | 0.00 | 7.67E-01 |
| IFNL1       | 6  | -0.06 | 0.03 | 6.37E-02 |
| IFNLR1      | 3  | 0.01  | 0.02 | 4.55E-01 |
| IGF1R       | 9  | -0.14 | 0.01 | 5.89E-40 |
| IGF2R       | 14 | 0.00  | 0.01 | 7.13E-01 |
| IGFBP1      | 2  | 0.01  | 0.05 | 7.60E-01 |
| IGFBP2      | 4  | 0.00  | 0.04 | 9.52E-01 |
| IGFBP3      | 5  | -0.01 | 0.01 | 6.09E-01 |
| IGFBP4      | 3  | 0.04  | 0.05 | 4.71E-01 |
| IGFBP6      | 4  | 0.01  | 0.04 | 8.23E-01 |
| IGFBP7      | 4  | 0.00  | 0.01 | 7.73E-01 |
| IGFBPL1     | 2  | -0.01 | 0.01 | 2.75E-01 |
| IGSF3       | 5  | 0.05  | 0.03 | 2.81E-02 |
| IGSF8       | 6  | 0.02  | 0.02 | 4.38E-01 |
| IKBKG       | 1  | -0.01 | 0.10 | 8.82E-01 |
| IKZF2       | 2  | -0.08 | 0.04 | 6.07E-02 |
| IL10        | 5  | -0.02 | 0.02 | 2.48E-01 |
| IL10RA      | 1  | 0.00  | 0.03 | 8.91E-01 |
| IL10RB      | 6  | -0.01 | 0.01 | 2.67E-01 |
| IL11        | 1  | 0.08  | 0.11 | 4.26E-01 |
| IL12A_IL12B | 17 | -0.01 | 0.01 | 2.45E-01 |
| IL12B       | 20 | -0.01 | 0.01 | 2.96E-01 |

|          |    |       |      |          |
|----------|----|-------|------|----------|
| IL12RB1  | 5  | 0.00  | 0.01 | 7.45E-01 |
| IL13     | 1  | 0.06  | 0.09 | 5.29E-01 |
| IL13RA1  | 2  | 0.04  | 0.05 | 4.04E-01 |
| IL15     | 21 | -0.01 | 0.01 | 6.55E-01 |
| IL15RA   | 2  | 0.01  | 0.02 | 7.07E-01 |
| IL16     | 2  | -0.02 | 0.01 | 1.51E-01 |
| IL17C    | 3  | -0.03 | 0.03 | 3.83E-01 |
| IL17D    | 3  | 0.00  | 0.01 | 7.89E-01 |
| IL17F    | 1  | 0.04  | 0.11 | 7.35E-01 |
| IL17RA   | 3  | 0.00  | 0.01 | 3.94E-01 |
| IL17RB   | 11 | 0.00  | 0.01 | 6.93E-01 |
| IL18     | 10 | -0.03 | 0.01 | 9.15E-03 |
| IL18BP   | 9  | -0.03 | 0.02 | 8.11E-02 |
| IL18R1   | 12 | -0.01 | 0.01 | 1.65E-01 |
| IL18RAP  | 3  | -0.03 | 0.03 | 4.45E-01 |
| IL19     | 5  | -0.05 | 0.01 | 1.71E-08 |
| IL1A     | 1  | 0.04  | 0.04 | 2.94E-01 |
| IL1B     | 2  | -0.01 | 0.02 | 6.60E-01 |
| IL1R1    | 13 | 0.01  | 0.01 | 4.87E-01 |
| IL1R2    | 14 | 0.01  | 0.01 | 5.27E-01 |
| IL1RAP   | 4  | 0.00  | 0.00 | 9.72E-01 |
| IL1RL1   | 13 | 0.00  | 0.01 | 6.80E-01 |
| IL1RL2   | 12 | 0.02  | 0.01 | 5.72E-02 |
| IL1RN    | 2  | -0.05 | 0.02 | 2.48E-02 |
| IL20RA   | 1  | -0.05 | 0.08 | 5.81E-01 |
| IL22RA1  | 2  | 0.06  | 0.02 | 1.92E-04 |
| IL2RA    | 8  | -0.02 | 0.01 | 1.29E-02 |
| IL32     | 9  | -0.01 | 0.02 | 4.10E-01 |
| IL33     | 1  | -0.04 | 0.13 | 7.42E-01 |
| IL34     | 1  | -0.01 | 0.01 | 7.53E-02 |
| IL3RA    | 4  | 0.02  | 0.03 | 5.62E-01 |
| IL4R     | 5  | -0.04 | 0.01 | 6.27E-03 |
| IL5RA    | 23 | 0.02  | 0.01 | 6.93E-02 |
| IL6      | 4  | -0.01 | 0.02 | 5.74E-01 |
| IL6R     | 6  | -0.01 | 0.00 | 1.22E-01 |
| IL6ST    | 12 | -0.09 | 0.01 | 1.05E-12 |
| IL7      | 4  | -0.04 | 0.04 | 2.73E-01 |
| IL7R     | 12 | -0.03 | 0.00 | 1.01E-09 |
| ILKAP    | 2  | -0.12 | 0.07 | 9.88E-02 |
| IMPA1    | 2  | -0.01 | 0.02 | 7.04E-01 |
| ING1     | 1  | -0.10 | 0.09 | 2.63E-01 |
| INHBC    | 6  | 0.00  | 0.01 | 8.86E-01 |
| INPP1    | 3  | -0.05 | 0.04 | 2.73E-01 |
| IPCEF1   | 2  | -0.04 | 0.05 | 3.83E-01 |
| IQGAP2   | 1  | 0.01  | 0.03 | 8.55E-01 |
| IRAG2    | 2  | -0.13 | 0.06 | 1.95E-02 |
| IRAK1    | 1  | -0.01 | 0.08 | 8.82E-01 |
| IRAK4    | 1  | -0.09 | 0.10 | 3.61E-01 |
| ISLR2    | 8  | -0.10 | 0.01 | 1.62E-40 |
| ISM1     | 3  | -0.03 | 0.03 | 1.72E-01 |
| ITGA11   | 5  | 0.02  | 0.02 | 2.01E-01 |
| ITGA5    | 11 | 0.00  | 0.02 | 9.83E-01 |
| ITGA6    | 7  | -0.09 | 0.01 | 4.00E-09 |
| ITGAM    | 10 | -0.03 | 0.02 | 7.33E-02 |
| ITGAV    | 6  | -0.01 | 0.02 | 7.05E-01 |
| ITGB1    | 7  | -0.12 | 0.02 | 3.98E-09 |
| ITGB1BP2 | 5  | 0.04  | 0.03 | 2.07E-01 |
| ITGB2    | 10 | -0.04 | 0.02 | 1.38E-02 |
| ITGB5    | 6  | -0.02 | 0.03 | 4.88E-01 |
| ITGB6    | 9  | -0.04 | 0.01 | 5.92E-03 |

|                |    |       |      |          |
|----------------|----|-------|------|----------|
| ITGB7          | 19 | 0.02  | 0.01 | 2.95E-03 |
| ITIH3          | 7  | 0.00  | 0.01 | 9.35E-01 |
| ITM2A          | 3  | -0.01 | 0.02 | 5.61E-01 |
| JAM2           | 6  | 0.06  | 0.02 | 6.07E-03 |
| JCHAIN         | 14 | 0.00  | 0.02 | 8.26E-01 |
| KAZALD1        | 6  | 0.00  | 0.01 | 7.36E-01 |
| KDR            | 12 | 0.01  | 0.01 | 3.38E-01 |
| KEL            | 17 | -0.07 | 0.01 | 2.31E-19 |
| KIFBP          | 3  | 0.03  | 0.03 | 4.11E-01 |
| KIR2DL3        | 4  | 0.01  | 0.01 | 2.68E-01 |
| KIR3DL1        | 3  | 0.01  | 0.01 | 3.40E-01 |
| KIRREL2        | 8  | 0.03  | 0.01 | 1.26E-02 |
| KIT            | 26 | -0.01 | 0.01 | 5.88E-01 |
| KITLG          | 15 | -0.01 | 0.01 | 2.89E-01 |
| KLB            | 9  | 0.00  | 0.01 | 8.11E-01 |
| KLK1           | 13 | -0.04 | 0.01 | 3.77E-14 |
| KLK10          | 5  | 0.01  | 0.01 | 2.65E-01 |
| KLK11          | 5  | 0.00  | 0.01 | 9.19E-01 |
| KLK12          | 5  | 0.00  | 0.00 | 8.17E-01 |
| KLK13          | 10 | 0.02  | 0.01 | 3.57E-02 |
| KLK14          | 11 | -0.02 | 0.01 | 5.03E-02 |
| KLK4           | 3  | 0.01  | 0.01 | 4.25E-01 |
| KLK6           | 3  | -0.02 | 0.02 | 3.44E-01 |
| KLK8           | 5  | 0.01  | 0.01 | 2.65E-01 |
| KLRB1          | 11 | -0.02 | 0.02 | 1.81E-01 |
| KLRD1          | 14 | 0.00  | 0.01 | 8.22E-01 |
| KRT18          | 10 | -0.04 | 0.02 | 1.41E-01 |
| KRT19          | 3  | 0.09  | 0.03 | 2.07E-03 |
| KRT5           | 5  | 0.04  | 0.02 | 1.11E-01 |
| KYAT1          | 6  | -0.07 | 0.04 | 6.97E-02 |
| KYNU           | 5  | -0.03 | 0.02 | 9.01E-02 |
| L1CAM          | 6  | -0.02 | 0.02 | 3.44E-01 |
| LACTB2         | 3  | -0.02 | 0.03 | 5.91E-01 |
| LAG3           | 12 | -0.03 | 0.01 | 7.51E-02 |
| LAIR1          | 4  | -0.01 | 0.01 | 3.69E-01 |
| LAIR2          | 5  | 0.00  | 0.01 | 6.44E-01 |
| LAMA4          | 12 | -0.01 | 0.01 | 6.90E-01 |
| LAMP2          | 2  | 0.04  | 0.06 | 5.58E-01 |
| LAMP3          | 11 | -0.06 | 0.02 | 5.87E-04 |
| LAT            | 6  | -0.03 | 0.03 | 3.81E-01 |
| LAT2           | 1  | -0.01 | 0.08 | 8.82E-01 |
| LAYN           | 4  | 0.02  | 0.01 | 5.01E-02 |
| LBP            | 2  | 0.00  | 0.01 | 8.64E-01 |
| LBR            | 6  | -0.03 | 0.02 | 1.28E-01 |
| LCN2           | 17 | 0.01  | 0.02 | 5.87E-01 |
| LDLR           | 17 | -0.02 | 0.01 | 1.79E-01 |
| LEFTY2         | 3  | -0.45 | 0.04 | 1.80E-23 |
| LEP            | 1  | 0.04  | 0.10 | 7.23E-01 |
| LEPR           | 9  | 0.01  | 0.02 | 6.47E-01 |
| LGALS1         | 2  | 0.00  | 0.02 | 8.24E-01 |
| LGALS3         | 7  | -0.03 | 0.01 | 2.35E-03 |
| LGALS4         | 3  | -0.16 | 0.01 | 3.21E-75 |
| LGALS7_LGALS7B | 7  | 0.15  | 0.01 | 2.58E-40 |
| LGALS8         | 7  | -0.11 | 0.01 | 8.95E-32 |
| LGALS9         | 4  | -0.03 | 0.01 | 1.55E-02 |
| LGMN           | 19 | -0.03 | 0.01 | 3.61E-02 |
| LHB            | 1  | 0.06  | 0.08 | 4.45E-01 |
| LIFR           | 13 | -0.12 | 0.01 | 1.29E-29 |
| LILRA2         | 11 | -0.01 | 0.01 | 3.18E-01 |
| LILRA5         | 9  | -0.02 | 0.02 | 1.78E-01 |

|         |    |       |      |          |
|---------|----|-------|------|----------|
| LILRB1  | 9  | 0.00  | 0.01 | 7.60E-01 |
| LILRB2  | 10 | -0.01 | 0.01 | 6.28E-02 |
| LILRB4  | 4  | -0.02 | 0.02 | 2.87E-01 |
| LILRB5  | 3  | 0.00  | 0.00 | 2.72E-01 |
| LPCAT2  | 1  | -0.11 | 0.04 | 1.15E-02 |
| LPL     | 9  | 0.00  | 0.01 | 7.18E-01 |
| LPO     | 14 | -0.02 | 0.01 | 9.85E-02 |
| LRIG1   | 11 | 0.00  | 0.01 | 5.11E-01 |
| LRP1    | 11 | -0.01 | 0.01 | 1.09E-01 |
| LRP11   | 6  | 0.01  | 0.01 | 4.45E-01 |
| LRPAP1  | 7  | -0.01 | 0.01 | 5.87E-02 |
| LRRC25  | 13 | -0.01 | 0.01 | 1.72E-01 |
| LRRN1   | 7  | -0.01 | 0.01 | 3.64E-02 |
| LSP1    | 2  | 0.00  | 0.03 | 9.46E-01 |
| LTA     | 10 | 0.00  | 0.01 | 5.41E-01 |
| LTA4H   | 1  | 0.04  | 0.05 | 4.25E-01 |
| LTBP2   | 8  | -0.01 | 0.03 | 6.79E-01 |
| LTBP3   | 6  | 0.01  | 0.01 | 3.22E-01 |
| LTBR    | 13 | -0.03 | 0.01 | 7.31E-03 |
| LXN     | 2  | 0.00  | 0.03 | 9.09E-01 |
| LY6D    | 5  | 0.01  | 0.01 | 4.70E-01 |
| LY75    | 7  | 0.00  | 0.00 | 4.20E-01 |
| LY9     | 14 | 0.00  | 0.01 | 5.82E-01 |
| LY96    | 11 | -0.01 | 0.02 | 7.18E-01 |
| LYAR    | 1  | -0.20 | 0.09 | 2.77E-02 |
| LYN     | 5  | -0.03 | 0.04 | 4.87E-01 |
| LYPD3   | 17 | -0.04 | 0.01 | 1.34E-07 |
| LYPD8   | 7  | 0.01  | 0.01 | 4.34E-01 |
| MAD1L1  | 1  | -0.13 | 0.05 | 8.54E-03 |
| MAGED1  | 2  | 0.02  | 0.05 | 6.18E-01 |
| MANF    | 6  | -0.03 | 0.03 | 3.52E-01 |
| MANSC1  | 18 | -0.04 | 0.02 | 2.85E-02 |
| MAP2K6  | 3  | -0.05 | 0.05 | 3.08E-01 |
| MAP3K5  | 1  | -0.01 | 0.08 | 8.82E-01 |
| MAP4K5  | 3  | 0.06  | 0.03 | 1.43E-02 |
| MAPK9   | 1  | -0.09 | 0.04 | 1.64E-02 |
| MARCO   | 9  | -0.01 | 0.01 | 2.95E-01 |
| MASP1   | 13 | -0.01 | 0.01 | 2.32E-01 |
| MATN2   | 5  | -0.01 | 0.01 | 2.35E-01 |
| MATN3   | 4  | 0.00  | 0.01 | 7.30E-01 |
| MAVS    | 3  | -0.01 | 0.04 | 7.57E-01 |
| MAX     | 8  | 0.00  | 0.03 | 9.23E-01 |
| MB      | 8  | 0.03  | 0.03 | 2.79E-01 |
| MCAM    | 9  | 0.04  | 0.02 | 2.79E-02 |
| MCFD2   | 4  | -0.03 | 0.03 | 2.68E-01 |
| MDGA1   | 6  | 0.00  | 0.00 | 7.21E-01 |
| MDK     | 11 | -0.03 | 0.02 | 1.79E-01 |
| MED18   | 2  | -0.14 | 0.07 | 4.58E-02 |
| MEGF10  | 13 | -0.01 | 0.01 | 4.22E-01 |
| MEGF9   | 11 | 0.01  | 0.01 | 2.83E-01 |
| MEP1B   | 15 | 0.00  | 0.00 | 7.25E-01 |
| MEPE    | 15 | 0.00  | 0.02 | 7.76E-01 |
| MERTK   | 14 | 0.01  | 0.01 | 3.55E-01 |
| MESD    | 4  | 0.02  | 0.04 | 5.68E-01 |
| MET     | 20 | -0.10 | 0.01 | 6.77E-21 |
| METAP1D | 3  | -0.11 | 0.05 | 2.95E-02 |
| METAP2  | 4  | -0.01 | 0.03 | 7.33E-01 |
| MFAP5   | 6  | -0.10 | 0.02 | 1.58E-05 |
| MFGES8  | 12 | -0.01 | 0.01 | 3.24E-01 |
| MGLL    | 3  | -0.06 | 0.04 | 1.69E-01 |



|           |    |       |      |          |
|-----------|----|-------|------|----------|
| MGMT      | 3  | 0.01  | 0.01 | 5.75E-01 |
| MIA       | 7  | 0.00  | 0.01 | 9.67E-01 |
| MICB_MICA | 8  | 0.00  | 0.00 | 9.08E-01 |
| MIF       | 4  | 0.01  | 0.03 | 7.09E-01 |
| MILR1     | 9  | -0.01 | 0.01 | 5.15E-01 |
| MITD1     | 2  | 0.01  | 0.05 | 8.94E-01 |
| MLN       | 22 | 0.02  | 0.01 | 7.65E-02 |
| MME       | 14 | 0.01  | 0.01 | 4.70E-01 |
| MMP1      | 13 | -0.01 | 0.01 | 1.91E-01 |
| MMP10     | 2  | -0.06 | 0.01 | 7.42E-05 |
| MMP12     | 3  | 0.01  | 0.01 | 2.05E-01 |
| MMP13     | 1  | -0.01 | 0.03 | 7.07E-01 |
| MMP3      | 4  | 0.01  | 0.01 | 4.15E-01 |
| MMP7      | 5  | -0.01 | 0.01 | 4.61E-01 |
| MMP8      | 2  | 0.01  | 0.01 | 6.66E-01 |
| MMP9      | 9  | -0.04 | 0.02 | 1.20E-02 |
| MNDA      | 1  | -0.42 | 0.09 | 7.24E-06 |
| MOG       | 2  | 0.02  | 0.02 | 4.65E-01 |
| MPHOSPH8  | 2  | -0.01 | 0.05 | 8.39E-01 |
| MPI       | 4  | -0.05 | 0.02 | 2.16E-02 |
| MPIG6B    | 5  | -0.06 | 0.03 | 6.33E-02 |
| MPO       | 7  | -0.03 | 0.02 | 6.80E-02 |
| MSLN      | 8  | -0.01 | 0.01 | 3.73E-01 |
| MSMB      | 5  | 0.00  | 0.01 | 6.08E-01 |
| MSR1      | 13 | 0.02  | 0.01 | 1.84E-01 |
| MSRA      | 2  | 0.00  | 0.06 | 9.36E-01 |
| MSTN      | 6  | 0.01  | 0.03 | 8.47E-01 |
| MUC13     | 4  | -0.16 | 0.01 | 4.39E-26 |
| MUC16     | 3  | 0.01  | 0.02 | 8.20E-01 |
| MVK       | 1  | 0.10  | 0.07 | 2.01E-01 |
| MYO9B     | 1  | 0.10  | 0.12 | 4.17E-01 |
| MYOC      | 11 | 0.04  | 0.02 | 1.81E-02 |
| MZB1      | 7  | 0.03  | 0.02 | 2.14E-01 |
| MZT1      | 2  | -0.03 | 0.06 | 6.70E-01 |
| NAAA      | 17 | 0.01  | 0.01 | 1.97E-01 |
| NADK      | 5  | -0.04 | 0.02 | 8.48E-03 |
| NBL1      | 3  | -0.02 | 0.03 | 5.93E-01 |
| NBN       | 3  | -0.03 | 0.05 | 5.73E-01 |
| NCAM1     | 8  | -0.03 | 0.01 | 3.95E-02 |
| NCAM2     | 5  | 0.03  | 0.02 | 2.03E-01 |
| NCAN      | 12 | 0.00  | 0.02 | 8.36E-01 |
| NCF2      | 4  | -0.02 | 0.02 | 3.89E-01 |
| NCK2      | 1  | -0.08 | 0.10 | 4.17E-01 |
| NCLN      | 1  | 0.03  | 0.13 | 8.41E-01 |
| NCR1      | 24 | -0.03 | 0.01 | 2.05E-02 |
| NCS1      | 7  | -0.01 | 0.03 | 6.50E-01 |
| NECTIN2   | 4  | 0.07  | 0.02 | 1.89E-04 |
| NECTIN4   | 6  | -0.01 | 0.02 | 6.68E-01 |
| NEFL      | 2  | -0.09 | 0.07 | 2.01E-01 |
| NELL1     | 20 | 0.01  | 0.01 | 2.40E-01 |
| NELL2     | 15 | -0.17 | 0.02 | 3.52E-20 |
| NFASC     | 4  | -0.04 | 0.01 | 8.31E-04 |
| NFATC1    | 2  | 0.02  | 0.04 | 6.62E-01 |
| NFATC3    | 1  | 0.08  | 0.08 | 3.22E-01 |
| NFKBIE    | 2  | 0.00  | 0.02 | 9.24E-01 |
| NID1      | 12 | 0.01  | 0.02 | 6.18E-01 |
| NID2      | 17 | -0.01 | 0.01 | 3.24E-01 |
| NINJ1     | 2  | 0.01  | 0.03 | 8.15E-01 |
| NME3      | 14 | -0.05 | 0.01 | 3.53E-05 |
| NMNAT1    | 4  | -0.02 | 0.02 | 2.14E-01 |

|          |    |       |      |          |
|----------|----|-------|------|----------|
| NOMO1    | 3  | -0.04 | 0.03 | 2.55E-01 |
| NOS1     | 2  | 0.01  | 0.04 | 9.06E-01 |
| NOS3     | 3  | -0.08 | 0.05 | 1.33E-01 |
| NOTCH1   | 7  | 0.05  | 0.01 | 5.46E-04 |
| NOTCH3   | 11 | -0.09 | 0.02 | 1.57E-04 |
| NPDC1    | 5  | -0.07 | 0.04 | 7.78E-02 |
| NPPB     | 2  | 0.00  | 0.02 | 8.58E-01 |
| NPPC     | 2  | 0.06  | 0.07 | 3.79E-01 |
| NPTX1    | 14 | -0.03 | 0.01 | 1.85E-04 |
| NPTXR    | 6  | 0.00  | 0.01 | 8.00E-01 |
| NPY      | 13 | 0.01  | 0.02 | 6.39E-01 |
| NRCAM    | 7  | -0.20 | 0.02 | 1.97E-16 |
| NRP1     | 6  | -0.03 | 0.01 | 1.61E-02 |
| NRP2     | 9  | 0.04  | 0.02 | 2.33E-02 |
| NRTN     | 1  | 0.15  | 0.09 | 9.18E-02 |
| NSFL1C   | 2  | 0.07  | 0.05 | 1.48E-01 |
| NT5C3A   | 4  | 0.04  | 0.03 | 2.87E-01 |
| NT5E     | 11 | -0.01 | 0.01 | 2.72E-01 |
| NTF3     | 5  | 0.03  | 0.02 | 2.30E-01 |
| NTF4     | 1  | -0.03 | 0.09 | 7.72E-01 |
| NTproBNP | 4  | 0.01  | 0.02 | 7.31E-01 |
| NTRK2    | 7  | 0.04  | 0.03 | 2.10E-01 |
| NTRK3    | 10 | 0.03  | 0.02 | 7.95E-02 |
| NUB1     | 4  | -0.03 | 0.02 | 2.56E-01 |
| NUCB2    | 5  | 0.00  | 0.01 | 6.99E-01 |
| NUDC     | 2  | 0.02  | 0.05 | 7.15E-01 |
| NUDT2    | 2  | 0.02  | 0.02 | 3.84E-01 |
| NUDT5    | 3  | -0.06 | 0.05 | 2.70E-01 |
| OBP2B    | 13 | 0.00  | 0.01 | 7.19E-01 |
| ODAM     | 2  | -0.02 | 0.02 | 3.64E-01 |
| OGFR     | 2  | 0.01  | 0.04 | 8.59E-01 |
| OGN      | 4  | 0.02  | 0.01 | 3.38E-02 |
| OLR1     | 7  | -0.04 | 0.02 | 7.91E-02 |
| OMD      | 6  | 0.00  | 0.02 | 8.33E-01 |
| OMG      | 8  | 0.01  | 0.02 | 5.94E-01 |
| OPTC     | 8  | 0.00  | 0.02 | 9.25E-01 |
| OSCAR    | 9  | 0.01  | 0.01 | 2.58E-01 |
| OSM      | 8  | -0.06 | 0.02 | 1.81E-03 |
| OSMR     | 5  | 0.01  | 0.01 | 1.18E-01 |
| OXT      | 10 | -0.01 | 0.01 | 5.14E-01 |
| P4HB     | 4  | -0.07 | 0.04 | 7.39E-02 |
| PADI2    | 1  | -0.01 | 0.04 | 8.60E-01 |
| PADI4    | 1  | 0.00  | 0.02 | 9.09E-01 |
| PAEP     | 3  | 0.00  | 0.01 | 5.36E-01 |
| PAG1     | 6  | -0.08 | 0.03 | 2.68E-03 |
| PAK4     | 2  | -0.07 | 0.08 | 3.68E-01 |
| PAM      | 4  | 0.00  | 0.01 | 8.36E-01 |
| PAMR1    | 4  | -0.01 | 0.01 | 5.33E-01 |
| PAPPA    | 11 | 0.03  | 0.02 | 3.64E-02 |
| PARK7    | 5  | -0.03 | 0.02 | 2.28E-01 |
| PARP1    | 2  | -0.04 | 0.03 | 1.63E-01 |
| PBLD     | 1  | 0.02  | 0.01 | 1.19E-01 |
| PCDH1    | 6  | 0.10  | 0.03 | 1.63E-03 |
| PCDH17   | 9  | 0.02  | 0.01 | 7.70E-03 |
| PCOLCE   | 1  | 0.08  | 0.03 | 5.86E-03 |
| PCSK9    | 9  | -0.01 | 0.01 | 6.68E-01 |
| PDCD1    | 12 | -0.01 | 0.02 | 7.82E-01 |
| PDCD1LG2 | 8  | -0.01 | 0.01 | 1.79E-02 |
| PDCD5    | 3  | 0.01  | 0.01 | 3.94E-01 |
| PDCD6    | 5  | 0.00  | 0.00 | 9.99E-01 |

|          |    |       |      |          |
|----------|----|-------|------|----------|
| PDGFA    | 19 | -0.01 | 0.01 | 5.90E-01 |
| PDGFB    | 18 | -0.01 | 0.01 | 5.08E-01 |
| PDGFC    | 7  | -0.02 | 0.02 | 1.37E-01 |
| PDGFRA   | 11 | 0.04  | 0.01 | 2.10E-03 |
| PDGFRB   | 2  | 0.00  | 0.00 | 8.62E-01 |
| PDLIM7   | 3  | 0.04  | 0.04 | 3.68E-01 |
| PEAR1    | 9  | 0.03  | 0.01 | 1.59E-02 |
| PEBP1    | 2  | -0.04 | 0.06 | 5.46E-01 |
| PECAM1   | 8  | -0.12 | 0.01 | 2.21E-41 |
| PFKFB2   | 4  | -0.02 | 0.02 | 2.73E-01 |
| PGF      | 3  | -0.02 | 0.04 | 6.27E-01 |
| PGLYRP1  | 13 | 0.01  | 0.01 | 3.64E-01 |
| PI3      | 4  | 0.00  | 0.02 | 7.64E-01 |
| PIGR     | 6  | 0.07  | 0.02 | 3.20E-04 |
| PIK3AP1  | 7  | -0.04 | 0.02 | 7.34E-02 |
| PIK3IP1  | 3  | -0.01 | 0.02 | 7.42E-01 |
| PILRA    | 6  | 0.00  | 0.00 | 3.63E-01 |
| PILRB    | 4  | 0.00  | 0.00 | 4.12E-01 |
| PKLR     | 4  | -0.03 | 0.02 | 1.91E-01 |
| PLA2G10  | 15 | 0.02  | 0.01 | 8.20E-02 |
| PLA2G15  | 9  | 0.00  | 0.01 | 8.55E-01 |
| PLA2G1B  | 18 | -0.04 | 0.02 | 1.81E-02 |
| PLA2G2A  | 6  | 0.00  | 0.01 | 7.27E-01 |
| PLA2G4A  | 3  | -0.04 | 0.05 | 4.39E-01 |
| PLA2G7   | 10 | -0.01 | 0.02 | 3.86E-01 |
| PLAT     | 4  | -0.16 | 0.04 | 1.50E-05 |
| PLAU     | 10 | 0.01  | 0.01 | 3.51E-01 |
| PLAUR    | 11 | 0.01  | 0.02 | 5.38E-01 |
| PLIN1    | 1  | -0.10 | 0.08 | 2.29E-01 |
| PLIN3    | 2  | 0.00  | 0.05 | 9.94E-01 |
| PLPBP    | 2  | -0.04 | 0.05 | 3.99E-01 |
| PLTP     | 11 | 0.01  | 0.01 | 2.83E-01 |
| PLXDC1   | 6  | 0.03  | 0.02 | 9.15E-02 |
| PLXNA4   | 5  | -0.01 | 0.03 | 6.29E-01 |
| PLXNB2   | 11 | -0.01 | 0.01 | 2.77E-02 |
| PLXNB3   | 5  | -0.02 | 0.04 | 5.58E-01 |
| PM20D1   | 8  | 0.00  | 0.01 | 9.21E-01 |
| PMVK     | 6  | -0.02 | 0.03 | 5.26E-01 |
| PNLIPRP2 | 7  | 0.00  | 0.00 | 3.29E-01 |
| PNPT1    | 2  | 0.04  | 0.05 | 4.44E-01 |
| PODXL    | 6  | -0.10 | 0.01 | 7.81E-37 |
| PODXL2   | 12 | 0.01  | 0.02 | 5.34E-01 |
| POLR2F   | 1  | -0.24 | 0.09 | 7.35E-03 |
| PON2     | 3  | -0.01 | 0.01 | 1.32E-01 |
| PON3     | 9  | 0.02  | 0.01 | 5.26E-02 |
| PPCDC    | 2  | 0.00  | 0.01 | 7.26E-01 |
| PPIB     | 3  | -0.06 | 0.05 | 2.06E-01 |
| PPME1    | 1  | -0.01 | 0.09 | 9.22E-01 |
| PPP1R12A | 4  | 0.06  | 0.04 | 1.12E-01 |
| PPP1R2   | 3  | -0.04 | 0.04 | 3.64E-01 |
| PPP1R9B  | 2  | 0.02  | 0.06 | 7.34E-01 |
| PPP3R1   | 5  | -0.01 | 0.03 | 6.45E-01 |
| PPY      | 8  | 0.00  | 0.02 | 9.39E-01 |
| PRCP     | 12 | 0.01  | 0.01 | 3.86E-01 |
| PRDX1    | 2  | -0.08 | 0.05 | 1.34E-01 |
| PRDX3    | 1  | -0.16 | 0.07 | 2.98E-02 |
| PRDX5    | 2  | 0.01  | 0.04 | 8.50E-01 |
| PRDX6    | 1  | 0.02  | 0.03 | 4.84E-01 |
| PRELP    | 1  | 0.01  | 0.01 | 2.71E-01 |
| PRKAB1   | 2  | -0.04 | 0.07 | 5.93E-01 |

|          |    |       |      |          |
|----------|----|-------|------|----------|
| PRKAR1A  | 5  | 0.00  | 0.02 | 9.11E-01 |
| PRKRA    | 2  | -0.03 | 0.04 | 5.12E-01 |
| PRL      | 3  | 0.00  | 0.04 | 9.18E-01 |
| PROC     | 8  | 0.01  | 0.02 | 5.65E-01 |
| PROK1    | 3  | 0.01  | 0.01 | 3.68E-01 |
| PRSS2    | 13 | 0.04  | 0.02 | 2.09E-02 |
| PRSS27   | 18 | -0.05 | 0.01 | 6.78E-12 |
| PRSS8    | 8  | 0.05  | 0.02 | 4.50E-02 |
| PRTFDC1  | 3  | 0.03  | 0.02 | 1.84E-01 |
| PRTG     | 9  | 0.00  | 0.01 | 8.96E-01 |
| PRTN3    | 15 | 0.00  | 0.01 | 9.57E-01 |
| PSG1     | 7  | -0.01 | 0.01 | 3.97E-01 |
| PSIP1    | 3  | -0.04 | 0.03 | 1.82E-01 |
| PSME1    | 3  | -0.01 | 0.04 | 7.76E-01 |
| PSME2    | 1  | 0.00  | 0.05 | 9.82E-01 |
| PSMG3    | 2  | 0.00  | 0.04 | 9.80E-01 |
| PSPN     | 10 | 0.05  | 0.03 | 8.75E-02 |
| PSRC1    | 2  | -0.08 | 0.03 | 4.60E-03 |
| PTGDS    | 2  | 0.09  | 0.06 | 1.43E-01 |
| PTH1R    | 2  | 0.05  | 0.03 | 8.52E-02 |
| PTN      | 4  | -0.04 | 0.03 | 1.41E-01 |
| PTPN1    | 3  | -0.05 | 0.04 | 1.95E-01 |
| PTPN6    | 2  | 0.03  | 0.05 | 6.13E-01 |
| PTPRF    | 15 | -0.03 | 0.02 | 5.74E-02 |
| PTPRM    | 8  | -0.11 | 0.01 | 6.61E-43 |
| PTPRN2   | 1  | 0.07  | 0.03 | 3.34E-02 |
| PTPRS    | 5  | 0.06  | 0.02 | 3.48E-04 |
| PTS      | 4  | -0.02 | 0.02 | 3.34E-01 |
| PTX3     | 5  | 0.01  | 0.01 | 6.50E-01 |
| PVALB    | 8  | -0.01 | 0.01 | 1.13E-01 |
| PVR      | 3  | -0.01 | 0.01 | 7.88E-02 |
| PXN      | 3  | -0.01 | 0.01 | 4.53E-01 |
| QDPR     | 1  | -0.01 | 0.08 | 8.82E-01 |
| QPCT     | 11 | -0.01 | 0.01 | 6.34E-01 |
| RAB6A    | 4  | -0.01 | 0.01 | 2.29E-01 |
| RABEPK   | 1  | 0.00  | 0.03 | 9.94E-01 |
| RABGAP1L | 2  | 0.06  | 0.05 | 2.20E-01 |
| RAD23B   | 3  | 0.00  | 0.05 | 9.63E-01 |
| RARRES1  | 1  | 0.01  | 0.01 | 1.79E-01 |
| RARRES2  | 3  | -0.01 | 0.02 | 6.98E-01 |
| RASSF2   | 1  | -0.06 | 0.05 | 2.61E-01 |
| RBKS     | 1  | 0.00  | 0.01 | 7.82E-01 |
| RBP2     | 4  | 0.05  | 0.03 | 1.02E-01 |
| RBP5     | 3  | 0.01  | 0.02 | 7.33E-01 |
| RCOR1    | 1  | 0.20  | 0.08 | 1.27E-02 |
| REG1A    | 6  | 0.14  | 0.01 | 1.74E-32 |
| REG1B    | 7  | 0.11  | 0.01 | 7.94E-26 |
| REG3A    | 9  | 0.00  | 0.02 | 9.64E-01 |
| REG4     | 1  | 0.05  | 0.03 | 1.07E-01 |
| RELT     | 4  | -0.02 | 0.01 | 2.35E-01 |
| REN      | 2  | -0.01 | 0.03 | 6.51E-01 |
| RET      | 8  | 0.00  | 0.01 | 7.40E-01 |
| RETN     | 15 | 0.01  | 0.01 | 6.22E-01 |
| RGMA     | 18 | 0.00  | 0.01 | 7.50E-01 |
| RGMB     | 4  | -0.03 | 0.02 | 1.66E-01 |
| RGS8     | 1  | 0.01  | 0.03 | 8.39E-01 |
| RHOC     | 3  | 0.03  | 0.06 | 5.71E-01 |
| RILP     | 4  | 0.00  | 0.04 | 9.48E-01 |
| RNASE3   | 5  | -0.02 | 0.02 | 1.84E-01 |
| RNASET2  | 9  | 0.01  | 0.01 | 2.35E-01 |

|           |    |       |      |          |
|-----------|----|-------|------|----------|
| ROBO1     | 9  | 0.01  | 0.02 | 7.08E-01 |
| ROBO2     | 6  | -0.01 | 0.03 | 6.82E-01 |
| ROR1      | 12 | -0.02 | 0.01 | 1.48E-01 |
| RP2       | 2  | -0.11 | 0.04 | 1.30E-02 |
| RRM2      | 1  | -0.04 | 0.08 | 6.37E-01 |
| RRM2B     | 3  | -0.01 | 0.04 | 7.99E-01 |
| RSPO1     | 10 | 0.00  | 0.02 | 9.49E-01 |
| RSPO3     | 8  | 0.01  | 0.02 | 6.66E-01 |
| RTBDN     | 3  | 0.05  | 0.03 | 8.73E-02 |
| RTN4R     | 10 | -0.01 | 0.01 | 3.55E-01 |
| RWDD1     | 3  | -0.02 | 0.03 | 5.35E-01 |
| S100A11   | 2  | 0.02  | 0.02 | 3.45E-01 |
| S100A12   | 4  | -0.02 | 0.02 | 2.52E-01 |
| S100A16   | 3  | 0.15  | 0.03 | 4.27E-06 |
| S100A4    | 5  | 0.03  | 0.03 | 3.43E-01 |
| S100P     | 5  | -0.06 | 0.03 | 4.02E-02 |
| SAMD9L    | 2  | 0.01  | 0.02 | 4.56E-01 |
| SCAMP3    | 4  | 0.01  | 0.03 | 7.56E-01 |
| SCARA5    | 7  | 0.04  | 0.01 | 2.90E-03 |
| SCARB1    | 1  | -0.16 | 0.14 | 2.76E-01 |
| SCARB2    | 5  | 0.02  | 0.02 | 2.48E-01 |
| SCARF1    | 7  | -0.03 | 0.01 | 1.22E-02 |
| SCARF2    | 8  | -0.09 | 0.01 | 8.92E-11 |
| SCG2      | 4  | -0.47 | 0.04 | 2.42E-35 |
| SCG3      | 6  | 0.00  | 0.01 | 7.22E-01 |
| SCGB1A1   | 18 | 0.03  | 0.01 | 2.93E-03 |
| SCGB3A2   | 18 | 0.00  | 0.01 | 8.30E-01 |
| SCGN      | 4  | 0.13  | 0.02 | 1.36E-08 |
| SCLY      | 7  | 0.00  | 0.02 | 9.25E-01 |
| SCP2      | 1  | 0.19  | 0.09 | 3.61E-02 |
| SCRN1     | 2  | 0.02  | 0.03 | 6.52E-01 |
| SDC1      | 13 | -0.04 | 0.01 | 9.79E-03 |
| SDC4      | 21 | 0.00  | 0.01 | 7.88E-01 |
| SELE      | 9  | -0.08 | 0.01 | 3.14E-41 |
| SELP      | 10 | -0.08 | 0.01 | 1.25E-11 |
| SELPLG    | 12 | -0.01 | 0.01 | 3.27E-01 |
| SEMA3F    | 6  | -0.24 | 0.03 | 5.26E-14 |
| SEMA4C    | 6  | -0.25 | 0.02 | 2.00E-39 |
| SEMA4D    | 6  | -0.01 | 0.03 | 6.39E-01 |
| SEMA7A    | 19 | 0.00  | 0.01 | 7.31E-01 |
| SEPTIN9   | 2  | -0.04 | 0.05 | 4.75E-01 |
| SERPINA11 | 8  | 0.00  | 0.01 | 8.21E-01 |
| SERPINA12 | 5  | 0.01  | 0.01 | 1.62E-01 |
| SERPINA9  | 3  | 0.00  | 0.01 | 9.87E-01 |
| SERPINB1  | 3  | 0.05  | 0.04 | 1.57E-01 |
| SERPINB6  | 2  | 0.02  | 0.03 | 6.30E-01 |
| SERPINB8  | 2  | -0.01 | 0.01 | 1.95E-01 |
| SERPINB9  | 2  | -0.05 | 0.04 | 2.02E-01 |
| SERPINE1  | 18 | -0.02 | 0.01 | 2.06E-01 |
| SESTD1    | 3  | 0.00  | 0.04 | 9.49E-01 |
| SETMAR    | 2  | -0.01 | 0.02 | 6.24E-01 |
| SEZ6L     | 8  | 0.02  | 0.02 | 3.02E-01 |
| SEZ6L2    | 8  | 0.04  | 0.02 | 6.22E-02 |
| SF3B4     | 4  | -0.01 | 0.04 | 8.58E-01 |
| SFRP1     | 5  | 0.01  | 0.02 | 5.83E-01 |
| SFTPA1    | 1  | -0.02 | 0.02 | 2.34E-01 |
| SFTPA2    | 5  | 0.02  | 0.01 | 1.16E-03 |
| SFTPD     | 12 | -0.03 | 0.01 | 3.38E-06 |
| SH2B3     | 4  | 0.03  | 0.04 | 4.61E-01 |
| SH2D1A    | 2  | -0.12 | 0.04 | 1.97E-03 |

|          |    |       |      |          |
|----------|----|-------|------|----------|
| SHMT1    | 5  | 0.01  | 0.01 | 2.49E-01 |
| SIAE     | 9  | 0.00  | 0.02 | 9.58E-01 |
| SIGLEC1  | 11 | -0.01 | 0.01 | 6.73E-01 |
| SIGLEC10 | 9  | 0.00  | 0.01 | 6.27E-01 |
| SIGLEC5  | 3  | 0.00  | 0.01 | 7.75E-01 |
| SIGLEC6  | 23 | 0.00  | 0.01 | 6.74E-01 |
| SIGLEC7  | 9  | -0.01 | 0.01 | 5.47E-01 |
| SIGLEC9  | 11 | -0.02 | 0.01 | 7.34E-04 |
| SIRPA    | 8  | 0.00  | 0.00 | 4.42E-01 |
| SIRPB1   | 11 | -0.01 | 0.01 | 2.22E-01 |
| SIRT2    | 3  | 0.01  | 0.03 | 6.30E-01 |
| SIT1     | 6  | -0.09 | 0.03 | 4.82E-04 |
| SKAP1    | 8  | -0.12 | 0.03 | 6.99E-06 |
| SKAP2    | 3  | 0.02  | 0.04 | 6.59E-01 |
| SLAMF1   | 6  | -0.01 | 0.03 | 7.99E-01 |
| SLAMF6   | 3  | -0.07 | 0.02 | 6.29E-03 |
| SLAMF7   | 9  | 0.00  | 0.01 | 5.45E-01 |
| SLAMF8   | 5  | -0.01 | 0.01 | 3.41E-01 |
| SLC16A1  | 4  | -0.01 | 0.03 | 6.69E-01 |
| SLC27A4  | 3  | -0.05 | 0.04 | 2.14E-01 |
| SLC39A14 | 2  | -0.10 | 0.04 | 1.03E-02 |
| SLC39A5  | 8  | 0.01  | 0.02 | 6.14E-01 |
| SLIT2    | 1  | -0.06 | 0.08 | 4.50E-01 |
| SLITRK2  | 11 | 0.08  | 0.02 | 2.77E-05 |
| SLITRK6  | 8  | 0.01  | 0.01 | 2.59E-01 |
| SMAD1    | 5  | -0.02 | 0.04 | 6.03E-01 |
| SMAD5    | 2  | 0.01  | 0.03 | 7.31E-01 |
| SMOC1    | 11 | -0.02 | 0.01 | 2.36E-01 |
| SMOC2    | 5  | 0.00  | 0.01 | 9.44E-01 |
| SMPD1    | 16 | 0.00  | 0.01 | 6.68E-01 |
| SMPDL3A  | 21 | 0.00  | 0.01 | 9.40E-01 |
| SNAP23   | 3  | -0.02 | 0.04 | 5.49E-01 |
| SNAP29   | 5  | 0.00  | 0.03 | 9.53E-01 |
| SNCG     | 1  | 0.00  | 0.01 | 8.76E-01 |
| SNX9     | 2  | 0.04  | 0.04 | 3.59E-01 |
| SOD1     | 3  | -0.04 | 0.04 | 3.23E-01 |
| SOD2     | 9  | 0.01  | 0.02 | 4.50E-01 |
| SORCS2   | 4  | 0.01  | 0.01 | 2.85E-01 |
| SORD     | 4  | 0.02  | 0.03 | 4.37E-01 |
| SORT1    | 16 | -0.05 | 0.01 | 1.63E-04 |
| SOST     | 14 | 0.01  | 0.02 | 5.87E-01 |
| SPARC    | 15 | -0.02 | 0.02 | 2.79E-01 |
| SPARCL1  | 4  | 0.00  | 0.01 | 5.03E-01 |
| SPINK1   | 2  | -0.01 | 0.01 | 5.21E-01 |
| SPINK4   | 5  | -0.01 | 0.01 | 8.35E-02 |
| SPINK5   | 7  | -0.06 | 0.01 | 3.25E-07 |
| SPINK6   | 1  | -0.01 | 0.01 | 3.49E-01 |
| SPINT1   | 8  | -0.01 | 0.01 | 2.93E-01 |
| SPINT2   | 16 | 0.01  | 0.01 | 4.87E-01 |
| SPOCK1   | 13 | 0.00  | 0.02 | 8.05E-01 |
| SPON1    | 7  | 0.04  | 0.01 | 4.36E-03 |
| SPON2    | 1  | 0.01  | 0.02 | 7.33E-01 |
| SPP1     | 7  | -0.01 | 0.03 | 7.15E-01 |
| SPRY2    | 7  | 0.00  | 0.02 | 9.97E-01 |
| SRC      | 1  | 0.23  | 0.09 | 7.76E-03 |
| SRP14    | 2  | -0.05 | 0.04 | 2.02E-01 |
| SRPK2    | 4  | -0.02 | 0.03 | 5.18E-01 |
| SSC4D    | 11 | 0.01  | 0.01 | 5.94E-01 |
| SSC5D    | 11 | 0.02  | 0.01 | 1.67E-01 |
| ST3GAL1  | 8  | 0.01  | 0.01 | 5.86E-01 |

|         |    |       |      |          |
|---------|----|-------|------|----------|
| ST6GAL1 | 9  | -0.04 | 0.02 | 1.02E-01 |
| STAMBP  | 3  | -0.04 | 0.05 | 4.22E-01 |
| STAT5B  | 3  | -0.01 | 0.05 | 8.08E-01 |
| STC1    | 6  | -0.13 | 0.03 | 5.97E-07 |
| STC2    | 7  | 0.00  | 0.04 | 9.41E-01 |
| STIP1   | 2  | -0.03 | 0.05 | 4.77E-01 |
| STK11   | 4  | -0.03 | 0.04 | 4.21E-01 |
| STK24   | 2  | -0.06 | 0.06 | 3.69E-01 |
| STK4    | 4  | 0.00  | 0.04 | 9.76E-01 |
| STX16   | 1  | -0.06 | 0.08 | 4.46E-01 |
| STX4    | 2  | -0.09 | 0.06 | 1.48E-01 |
| STX6    | 2  | -0.04 | 0.07 | 5.23E-01 |
| STX8    | 3  | -0.03 | 0.04 | 5.20E-01 |
| SUGT1   | 2  | -0.05 | 0.07 | 4.53E-01 |
| SULT1A1 | 1  | -0.01 | 0.05 | 7.83E-01 |
| SULT2A1 | 4  | -0.01 | 0.02 | 5.30E-01 |
| SUMF2   | 15 | -0.01 | 0.01 | 1.26E-01 |
| SUSD1   | 5  | 0.00  | 0.03 | 9.56E-01 |
| SUSD2   | 4  | 0.01  | 0.01 | 3.24E-01 |
| TACC3   | 4  | -0.02 | 0.03 | 5.58E-01 |
| TACSTD2 | 14 | -0.01 | 0.01 | 1.83E-01 |
| TAFA5   | 2  | 0.05  | 0.03 | 9.79E-02 |
| TARBP2  | 3  | -0.01 | 0.04 | 8.10E-01 |
| TBC1D17 | 1  | 0.00  | 0.01 | 9.63E-01 |
| TBC1D23 | 4  | -0.05 | 0.03 | 5.49E-02 |
| TBC1D5  | 2  | -0.03 | 0.06 | 5.53E-01 |
| TBCB    | 4  | -0.04 | 0.04 | 3.31E-01 |
| TBCC    | 4  | 0.00  | 0.03 | 9.85E-01 |
| TBL1X   | 6  | 0.00  | 0.03 | 8.95E-01 |
| TCL1A   | 21 | -0.02 | 0.01 | 1.06E-01 |
| TCN2    | 3  | 0.00  | 0.01 | 9.47E-01 |
| TDGF1   | 2  | -1.35 | 0.10 | 1.18E-44 |
| TDRKH   | 4  | -0.01 | 0.01 | 5.35E-01 |
| TEK     | 11 | 0.03  | 0.01 | 6.09E-05 |
| TFF1    | 5  | 0.02  | 0.01 | 1.32E-01 |
| TFF2    | 8  | 0.08  | 0.02 | 6.27E-05 |
| TFF3    | 3  | 0.02  | 0.01 | 1.61E-01 |
| TFPI    | 8  | -0.01 | 0.01 | 3.79E-01 |
| TFPI2   | 9  | -0.01 | 0.02 | 7.78E-01 |
| TFRC    | 10 | -0.02 | 0.01 | 3.85E-02 |
| TGFA    | 4  | -0.09 | 0.03 | 6.50E-04 |
| TGFB1   | 10 | -0.02 | 0.02 | 1.39E-01 |
| TGFB1   | 10 | 0.00  | 0.01 | 8.11E-01 |
| TGFB2   | 8  | -0.25 | 0.02 | 8.33E-27 |
| TGFB3   | 7  | 0.00  | 0.02 | 9.05E-01 |
| TGM2    | 2  | 0.02  | 0.03 | 5.01E-01 |
| THBD    | 15 | 0.03  | 0.01 | 5.26E-02 |
| THBS2   | 7  | -0.01 | 0.01 | 1.64E-01 |
| THBS4   | 6  | 0.05  | 0.01 | 1.87E-03 |
| THOP1   | 1  | -0.02 | 0.02 | 2.61E-01 |
| THPO    | 17 | -0.02 | 0.02 | 1.45E-01 |
| THY1    | 3  | -0.02 | 0.01 | 1.55E-01 |
| TIA1    | 3  | 0.03  | 0.04 | 4.92E-01 |
| TIE1    | 12 | 0.03  | 0.01 | 5.52E-04 |
| TIGAR   | 2  | 0.06  | 0.06 | 2.72E-01 |
| TIMD4   | 25 | 0.00  | 0.01 | 6.49E-01 |
| TIMP1   | 5  | -0.01 | 0.03 | 6.62E-01 |
| TIMP3   | 17 | -0.01 | 0.01 | 3.37E-01 |
| TIMP4   | 6  | -0.03 | 0.01 | 9.30E-03 |
| TINAGL1 | 9  | -0.04 | 0.02 | 7.55E-02 |

|           |    |       |      |          |
|-----------|----|-------|------|----------|
| TJAP1     | 2  | -0.01 | 0.07 | 9.19E-01 |
| TLR3      | 6  | -0.01 | 0.00 | 9.43E-02 |
| TMPRSS15  | 7  | -0.09 | 0.01 | 3.19E-10 |
| TMPRSS5   | 18 | 0.01  | 0.01 | 2.47E-01 |
| TMSB10    | 6  | -0.05 | 0.03 | 8.39E-02 |
| TNC       | 15 | 0.02  | 0.01 | 8.04E-02 |
| TNF       | 3  | -0.05 | 0.02 | 5.19E-02 |
| TNFAIP8   | 1  | 0.02  | 0.06 | 7.87E-01 |
| TNFRSF10A | 4  | 0.02  | 0.01 | 1.01E-01 |
| TNFRSF10B | 3  | 0.00  | 0.01 | 9.43E-01 |
| TNFRSF10C | 18 | 0.00  | 0.01 | 8.78E-01 |
| TNFRSF11A | 7  | 0.02  | 0.01 | 1.98E-02 |
| TNFRSF11B | 9  | 0.00  | 0.02 | 9.21E-01 |
| TNFRSF12A | 2  | -0.08 | 0.06 | 1.56E-01 |
| TNFRSF13B | 12 | 0.00  | 0.02 | 8.40E-01 |
| TNFRSF13C | 12 | 0.01  | 0.02 | 6.26E-01 |
| TNFRSF14  | 5  | -0.04 | 0.03 | 1.35E-01 |
| TNFRSF19  | 4  | 0.00  | 0.02 | 8.16E-01 |
| TNFRSF1A  | 7  | 0.11  | 0.03 | 7.20E-05 |
| TNFRSF1B  | 6  | -0.06 | 0.02 | 7.13E-03 |
| TNFRSF21  | 12 | 0.00  | 0.02 | 9.84E-01 |
| TNFRSF4   | 6  | -0.04 | 0.02 | 1.05E-01 |
| TNFRSF6B  | 4  | -0.02 | 0.02 | 2.77E-01 |
| TNFRSF8   | 8  | -0.01 | 0.02 | 4.30E-01 |
| TNFRSF9   | 6  | 0.05  | 0.03 | 5.70E-02 |
| TNFSF10   | 12 | -0.01 | 0.01 | 9.68E-02 |
| TNFSF11   | 8  | -0.04 | 0.01 | 2.39E-03 |
| TNFSF12   | 17 | 0.01  | 0.01 | 2.03E-01 |
| TNFSF13   | 7  | 0.00  | 0.01 | 9.39E-01 |
| TNFSF13B  | 6  | 0.01  | 0.03 | 6.11E-01 |
| TNFSF14   | 5  | 0.01  | 0.02 | 5.79E-01 |
| TNR       | 17 | 0.02  | 0.01 | 8.67E-02 |
| TNXB      | 6  | 0.01  | 0.01 | 3.39E-01 |
| TP53      | 1  | -0.06 | 0.08 | 4.36E-01 |
| TP53INP1  | 2  | -0.02 | 0.04 | 6.77E-01 |
| TPMT      | 2  | -0.01 | 0.01 | 2.56E-01 |
| TPP1      | 13 | -0.01 | 0.02 | 3.33E-01 |
| TPPP3     | 1  | -0.01 | 0.07 | 8.37E-01 |
| TPSAB1    | 14 | -0.01 | 0.01 | 4.04E-01 |
| TRAF2     | 3  | -0.01 | 0.05 | 7.57E-01 |
| TREM2     | 7  | -0.01 | 0.01 | 5.21E-01 |
| TREML2    | 8  | -0.01 | 0.02 | 6.59E-01 |
| TRIAP1    | 7  | -0.05 | 0.02 | 5.46E-02 |
| TRIM21    | 3  | -0.05 | 0.05 | 3.23E-01 |
| TRIM5     | 1  | 0.02  | 0.02 | 1.98E-01 |
| TSHB      | 18 | 0.00  | 0.02 | 8.53E-01 |
| TSPAN1    | 3  | 0.10  | 0.05 | 7.69E-02 |
| TST       | 1  | -0.08 | 0.05 | 1.14E-01 |
| TXLNA     | 3  | -0.01 | 0.04 | 8.37E-01 |
| TXNDC15   | 10 | 0.00  | 0.01 | 4.26E-01 |
| TXNDC5    | 4  | 0.04  | 0.03 | 2.24E-01 |
| TXNRD1    | 5  | 0.02  | 0.04 | 6.26E-01 |
| TYMP      | 2  | -0.03 | 0.02 | 2.58E-01 |
| TYRO3     | 8  | 0.01  | 0.01 | 1.64E-01 |
| UBAC1     | 1  | -0.03 | 0.09 | 7.22E-01 |
| ULBP2     | 8  | 0.06  | 0.01 | 2.88E-08 |
| UMOD      | 16 | 0.00  | 0.01 | 7.34E-01 |
| USO1      | 3  | -0.02 | 0.04 | 7.32E-01 |
| USP8      | 5  | -0.01 | 0.03 | 8.24E-01 |
| UXS1      | 7  | 0.00  | 0.02 | 8.49E-01 |



|         |    |       |      |          |
|---------|----|-------|------|----------|
| VAMP5   | 2  | 0.80  | 0.05 | 8.56E-50 |
| VASH1   | 5  | 0.01  | 0.03 | 6.18E-01 |
| VASN    | 5  | -0.03 | 0.01 | 2.38E-02 |
| VAT1    | 9  | -0.03 | 0.02 | 6.57E-02 |
| VCAM1   | 12 | -0.03 | 0.02 | 1.37E-01 |
| VCAN    | 15 | 0.01  | 0.01 | 4.44E-01 |
| VEGFA   | 13 | 0.00  | 0.01 | 8.91E-01 |
| VEGFC   | 17 | 0.01  | 0.02 | 4.28E-01 |
| VEGFD   | 7  | -0.05 | 0.02 | 2.06E-02 |
| VMO1    | 7  | -0.02 | 0.01 | 1.10E-02 |
| VNN2    | 10 | 0.01  | 0.01 | 3.56E-01 |
| VPS37A  | 2  | -0.05 | 0.06 | 3.79E-01 |
| VPS53   | 2  | 0.02  | 0.06 | 6.81E-01 |
| VSIG4   | 8  | -0.03 | 0.03 | 3.05E-01 |
| VSIR    | 9  | 0.00  | 0.01 | 8.80E-01 |
| VSTM1   | 4  | 0.01  | 0.01 | 3.82E-01 |
| VSTM2L  | 2  | -0.01 | 0.02 | 6.46E-01 |
| VTA1    | 4  | 0.01  | 0.04 | 7.67E-01 |
| VTCN1   | 2  | -0.30 | 0.04 | 4.18E-12 |
| VWA1    | 7  | 0.01  | 0.02 | 3.96E-01 |
| VWC2    | 3  | 0.02  | 0.01 | 5.41E-02 |
| VWF     | 6  | 0.23  | 0.01 | 9.16E-62 |
| WARS    | 3  | -0.05 | 0.02 | 4.94E-03 |
| WAS     | 3  | -0.06 | 0.04 | 1.25E-01 |
| WASF1   | 3  | -0.01 | 0.02 | 6.10E-01 |
| WASF3   | 1  | 0.00  | 0.03 | 9.46E-01 |
| WFDC12  | 12 | 0.01  | 0.01 | 5.88E-01 |
| WFDC2   | 3  | -0.14 | 0.04 | 4.01E-04 |
| WFIKKN1 | 14 | -0.01 | 0.01 | 5.28E-01 |
| WFIKKN2 | 4  | 0.02  | 0.01 | 3.01E-02 |
| WIF1    | 14 | -0.02 | 0.01 | 6.75E-02 |
| WNT9A   | 2  | -0.07 | 0.04 | 1.33E-01 |
| WWP2    | 3  | -0.03 | 0.02 | 2.25E-01 |
| XCL1    | 11 | 0.00  | 0.01 | 9.96E-01 |
| XG      | 1  | 0.00  | 0.09 | 9.56E-01 |
| XPNPEP2 | 12 | 0.00  | 0.02 | 8.65E-01 |
| XRCC4   | 1  | 0.04  | 0.07 | 5.27E-01 |
| YES1    | 2  | -0.09 | 0.05 | 7.74E-02 |
| YTHDF3  | 1  | -0.01 | 0.06 | 8.82E-01 |
| ZBTB16  | 7  | -0.01 | 0.02 | 3.18E-01 |
| ZBTB17  | 2  | -0.09 | 0.05 | 6.16E-02 |

**Supplementary Table 5. Function of proteins affecting COVID-19 risk in MR analysis.**

| Protein | function                                                                                                                                                                                                                                                                                                                                                                                                                                                                                                                                                                                                                  |
|---------|---------------------------------------------------------------------------------------------------------------------------------------------------------------------------------------------------------------------------------------------------------------------------------------------------------------------------------------------------------------------------------------------------------------------------------------------------------------------------------------------------------------------------------------------------------------------------------------------------------------------------|
| ADAM15  | Disintegrin and metalloproteinase domain-containing protein 15; Active metalloproteinase with gelatinolytic and collagenolytic activity. Plays a role in the wound healing process. Mediates both heterotypic intraepithelial cell/T-cell interactions and homotypic T-cell aggregation. Inhibits beta-1 integrin-mediated cell adhesion and migration of airway smooth muscle cells. Suppresses cell motility on or towards fibronectin possibly by driving alpha-v/beta-1 integrin (ITAGV-ITGB1) cell surface expression via ERK1/2 inactivation. Cleaves E-cadherin in response to growth factor deprivation. [...]    |
| ADGRG1  | Adhesion G-protein coupled receptor G1; Receptor involved in cell adhesion and probably in cell-cell interactions. Mediates cell matrix adhesion in developing neurons and hematopoietic stem cells. Receptor for collagen III/COL3A1 in the developing brain and involved in regulation of cortical development, specifically in maintenance of the pial basement membrane integrity and in cortical lamination (By similarity). Binding to the COL3A1 ligand inhibits neuronal migration and activates the RhoA pathway by coupling to GNA13 and possibly GNA12. Plays a role in the maintenance of hematopoiesis [...] |
| ADGRG2  | Adhesion G-protein coupled receptor G2; Orphan receptor. Could be involved in a signal transduction pathway controlling epididymal function and male fertility. May regulate fluid exchange within epididymis                                                                                                                                                                                                                                                                                                                                                                                                             |
| AMY2A   | Pancreatic alpha-amylase; Amylase, alpha 2A                                                                                                                                                                                                                                                                                                                                                                                                                                                                                                                                                                               |
| AMY2B   | Amylase, alpha 2B; Belongs to the glycosyl hydrolase 13 family                                                                                                                                                                                                                                                                                                                                                                                                                                                                                                                                                            |
| BST2    | Bone marrow stromal antigen 2; IFN-induced antiviral host restriction factor which efficiently blocks the release of diverse mammalian enveloped viruses by directly tethering nascent virions to the membranes of infected cells. Acts as a direct physical tether, holding virions to the cell membrane and linking virions to each other. The tethered virions can be internalized by endocytosis and subsequently degraded or they can remain on the cell surface. In either case, their spread as cell-free virions is restricted. Its target viruses belong to diverse families, including retroviridae: h [...]    |
| CA4     | Carbonic anhydrase 4; Reversible hydration of carbon dioxide. May stimulate the sodium/bicarbonate transporter activity of SLC4A4 that acts in pH homeostasis. It is essential for acid overload removal from the retina and retina epithelium, and acid release in the choriocapillaris in the choroid; Belongs to the alpha-carbonic anhydrase family                                                                                                                                                                                                                                                                   |
| CCL15   | C-C motif chemokine 15; Chemotactic factor that attracts T-cells and monocytes, but not neutrophils, eosinophils, or B-cells. Acts mainly via CC chemokine receptor CCR1. Also binds to CCR3. CCL15(22-92), CCL15(25-92) and CCL15(29-92) are more potent chemoattractants than the small-inducible cytokine A15; Belongs to the intercrine beta (chemokine CC) family                                                                                                                                                                                                                                                    |
| CCL28   | C-C motif chemokine 28; Chemotactic activity for resting CD4, CD8 T-cells and eosinophils. Binds to CCR3 and CCR10 and induces calcium mobilization in a dose-dependent manner; Chemokine ligands                                                                                                                                                                                                                                                                                                                                                                                                                         |

|         |                                                                                                                                                                                                                                                                                                                                                                                                                                                                                                    |
|---------|----------------------------------------------------------------------------------------------------------------------------------------------------------------------------------------------------------------------------------------------------------------------------------------------------------------------------------------------------------------------------------------------------------------------------------------------------------------------------------------------------|
| CD109   | CD109 antigen; Modulates negatively TGFB1 signaling in keratinocytes; Belongs to the protease inhibitor I39 (alpha-2-macroglobulin) family                                                                                                                                                                                                                                                                                                                                                         |
| CD209   | CD209 antigen; Pathogen-recognition receptor expressed on the surface of immature dendritic cells (DCs) and involved in initiation of primary immune response. Thought to mediate the endocytosis of pathogens which are subsequently degraded in lysosomal compartments. The receptor returns to the cell membrane surface and the pathogen-derived antigens are presented to resting T-cells via MHC class II proteins to initiate the adaptive immune response; C-type lectin domain containing |
| CD34    | Hematopoietic progenitor cell antigen CD34; Possible adhesion molecule with a role in early hematopoiesis by mediating the attachment of stem cells to the bone marrow extracellular matrix or directly to stromal cells. Could act as a scaffold for the attachment of lineage specific glycans, allowing stem cells to bind to lectins expressed by stromal cells or other marrow components. Presents carbohydrate ligands to selectins; CD molecules                                           |
| CD58    | Lymphocyte function-associated antigen 3; Ligand of the T-lymphocyte CD2 glycoprotein. This interaction is important in mediating thymocyte interactions with thymic epithelial cells, antigen-independent and -dependent interactions of T-lymphocytes with target cells and antigen- presenting cells and the T-lymphocyte rosetting with erythrocytes. In addition, the LFA-3/CD2 interaction may prime response by both the CD2+ and LFA-3+ cells                                              |
| CDH15   | Cadherin-15; Cadherins are calcium-dependent cell adhesion proteins. They preferentially interact with themselves in a homophilic manner in connecting cells; cadherins may thus contribute to the sorting of heterogeneous cell types. M-cadherin is part of the myogenic program and may provide a trigger for terminal muscle differentiation                                                                                                                                                   |
| CDH17   | Cadherin-17; Cadherins are calcium-dependent cell adhesion proteins. They preferentially interact with themselves in a homophilic manner in connecting cells; cadherins may thus contribute to the sorting of heterogeneous cell types. LI-cadherin may have a role in the morphological organization of liver and intestine. Involved in intestinal peptide transport                                                                                                                             |
| CLEC14A | C-type lectin domain family 14 member a; C-type lectin domain containing 14A                                                                                                                                                                                                                                                                                                                                                                                                                       |
| CTSS    | Cathepsin S; Thiol protease. Key protease responsible for the removal of the invariant chain from MHC class II molecules. The bond-specificity of this proteinase is in part similar to the specificities of cathepsin L and cathepsin N; Cathepsins                                                                                                                                                                                                                                               |

|        |                                                                                                                                                                                                                                                                                                                                                                                                                                                                                                                                                                                                                        |
|--------|------------------------------------------------------------------------------------------------------------------------------------------------------------------------------------------------------------------------------------------------------------------------------------------------------------------------------------------------------------------------------------------------------------------------------------------------------------------------------------------------------------------------------------------------------------------------------------------------------------------------|
| CX3CL1 | C-X3-C motif chemokine ligand 1; Fractalkine; Acts as a ligand for both CX3CR1 and integrins. Binds to CX3CR1. Binds to integrins ITGAV:ITGB3 and ITGA4:ITGB1. Can activate integrins in both a CX3CR1-dependent and CX3CR1-independent manner. In the presence of CX3CR1, activates integrins by binding to the classical ligand-binding site (site 1) in integrins. In the absence of CX3CR1, binds to a second site (site 2) in integrins which is distinct from site 1 and enhances the binding of other integrin ligands to site 1. The soluble form is chemotactic for T-cells and monocytes and not for n [...] |
| DPP10  | Inactive dipeptidyl peptidase 10; Promotes cell surface expression of the potassium channel KCND2. Modulates the activity and gating characteristics of the potassium channel KCND2. Has no dipeptidyl aminopeptidase activity; DASH family                                                                                                                                                                                                                                                                                                                                                                            |
| DRAXIN | Draxin; Chemorepulsive axon guidance protein required for the development of spinal cord and forebrain commissures. Acts as a chemorepulsive guidance protein for commissural axons during development. Able to inhibit or repel neurite outgrowth from dorsal spinal cord. Inhibits the stabilization of cytosolic beta- catenin (CTNNB1) via its interaction with LRP6, thereby acting as an antagonist of Wnt signaling pathway; Belongs to the draxin family                                                                                                                                                       |
| EFNA1  | Ephrin-A1; Cell surface GPI-bound ligand for Eph receptors, a family of receptor tyrosine kinases which are crucial for migration, repulsion and adhesion during neuronal, vascular and epithelial development. Binds promiscuously Eph receptors residing on adjacent cells, leading to contact-dependent bidirectional signaling into neighboring cells. Plays an important role in angiogenesis and tumor neovascularization. The recruitment of VAV2, VAV3 and PI3-kinase p85 subunit by phosphorylated EPHA2 is critical for EFNA1-induced RAC1 GTPase activation and vascular endothelial cell migration a [...] |
| ERBB4  | Receptor tyrosine-protein kinase erbB-4; Tyrosine-protein kinase that plays an essential role as cell surface receptor for neuregulins and EGF family members and regulates development of the heart, the central nervous system and the mammary gland, gene transcription, cell proliferation, differentiation, migration and apoptosis. Required for normal cardiac muscle differentiation during embryonic development, and for postnatal cardiomyocyte proliferation. Required for normal development of the embryonic central nervous system, especially for normal neural crest cell migration and normal [...]  |
| F2R    | Coagulation factor ii (thrombin) receptor; Proteinase-activated receptor 1; High affinity receptor for activated thrombin coupled to G proteins that stimulate phosphoinositide hydrolysis. May play a role in platelets activation and in vascular development; F2R receptors                                                                                                                                                                                                                                                                                                                                         |

|        |                                                                                                                                                                                                                                                                                                                                                                                                                                                                                                                                                                                                                        |
|--------|------------------------------------------------------------------------------------------------------------------------------------------------------------------------------------------------------------------------------------------------------------------------------------------------------------------------------------------------------------------------------------------------------------------------------------------------------------------------------------------------------------------------------------------------------------------------------------------------------------------------|
| FCGR2B | Low affinity immunoglobulin gamma Fc region receptor II-b; Receptor for the Fc region of complexed or aggregated immunoglobulins gamma. Low affinity receptor. Involved in a variety of effector and regulatory functions such as phagocytosis of immune complexes and modulation of antibody production by B-cells. Binding to this receptor results in down-modulation of previous state of cell activation triggered via antigen receptors on B-cells (BCR), T-cells (TCR) or via another Fc receptor. Isoform IIB1 fails to mediate endocytosis or phagocytosis. Isoform IIB2 does not trigger phagocytosis [...]  |
| FGF19  | Fibroblast growth factor 19; Involved in the suppression of bile acid biosynthesis through down-regulation of CYP7A1 expression, following positive regulation of the JNK and ERK1/2 cascades. Stimulates glucose uptake in adipocytes. Activity requires the presence of KLB and FGFR4; Belongs to the heparin-binding growth factors family                                                                                                                                                                                                                                                                          |
| FGFR2  | Fibroblast growth factor receptor 2; Tyrosine-protein kinase that acts as cell-surface receptor for fibroblast growth factors and plays an essential role in the regulation of cell proliferation, differentiation, migration and apoptosis, and in the regulation of embryonic development. Required for normal embryonic patterning, trophoblast function, limb bud development, lung morphogenesis, osteogenesis and skin development. Plays an essential role in the regulation of osteoblast differentiation, proliferation and apoptosis, and is required for normal skeleton development. Promotes cell p [...] |
| FLT4   | Vascular endothelial growth factor receptor 3; Tyrosine-protein kinase that acts as a cell-surface receptor for VEGFC and VEGFD, and plays an essential role in adult lymphangiogenesis and in the development of the vascular network and the cardiovascular system during embryonic development. Promotes proliferation, survival and migration of endothelial cells, and regulates angiogenic sprouting. Signaling by activated FLT4 leads to enhanced production of VEGFC, and to a lesser degree VEGFA, thereby creating a positive feedback loop that enhances FLT4 signaling. Modulates KDR signaling by [...]  |
| FOLR1  | Folate receptor alpha; Binds to folate and reduced folic acid derivatives and mediates delivery of 5-methyltetrahydrofolate and folate analogs into the interior of cells. Has high affinity for folate and folic acid analogs at neutral pH. Exposure to slightly acidic pH after receptor endocytosis triggers a conformation change that strongly reduces its affinity for folates and mediates their release. Required for normal embryonic development and normal cell proliferation                                                                                                                              |
| GKN1   | Gastrokine-1; Has mitogenic activity and may be involved in maintaining the integrity of the gastric mucosal epithelium; BRICHOS domain containing                                                                                                                                                                                                                                                                                                                                                                                                                                                                     |
| GOLM2  | Golgi membrane protein 2; Protein CASC4; Cancer susceptibility 4; Belongs to the GOLM1/CASC4 family                                                                                                                                                                                                                                                                                                                                                                                                                                                                                                                    |
| GP2    | Pancreatic secretory granule membrane major glycoprotein GP2; Glycoprotein 2                                                                                                                                                                                                                                                                                                                                                                                                                                                                                                                                           |

|        |                                                                                                                                                                                                                                                                                                                                                                                                                                                                                                                                                                                                                    |
|--------|--------------------------------------------------------------------------------------------------------------------------------------------------------------------------------------------------------------------------------------------------------------------------------------------------------------------------------------------------------------------------------------------------------------------------------------------------------------------------------------------------------------------------------------------------------------------------------------------------------------------|
| ICAM2  | Intercellular adhesion molecule 2; ICAM proteins are ligands for the leukocyte adhesion protein LFA-1 (integrin alpha-L/beta-2). ICAM2 may play a role in lymphocyte recirculation by blocking LFA-1-dependent cell adhesion. It mediates adhesive interactions important for antigen-specific immune response, NK-cell mediated clearance, lymphocyte recirculation, and other cellular interactions important for immune response and surveillance; CD molecules                                                                                                                                                 |
| ICAM5  | Intercellular adhesion molecule 5; ICAM proteins are ligands for the leukocyte adhesion protein LFA-1 (integrin alpha-L/beta-2); Ig-like cell adhesion molecule family                                                                                                                                                                                                                                                                                                                                                                                                                                             |
| IDS    | Iduronate 2-sulfatase; Required for the lysosomal degradation of heparan sulfate and dermatan sulfate; Sulfatases                                                                                                                                                                                                                                                                                                                                                                                                                                                                                                  |
| ISLR2  | Immunoglobulin superfamily containing leucine-rich repeat protein 2; Required for axon extension during neural development; Immunoglobulin like domain containing                                                                                                                                                                                                                                                                                                                                                                                                                                                  |
| ITGA6  | Integrin subunit alpha 6; Integrin alpha-6; Integrin alpha-6/beta-1 is a receptor for laminin on platelets. Integrin alpha-6/beta-4 is a receptor for laminin in epithelial cells and it plays a critical structural role in the hemidesmosome (By similarity). ITGA6:ITGB4 binds to NRG1 (via EGF domain) and this binding is essential for NRG1-ERBB signaling. ITGA6:ITGB4 binds to IGF1 and this binding is essential for IGF1 signaling                                                                                                                                                                       |
| ITGB1  | Integrin beta-1; Integrins alpha-1/beta-1, alpha-2/beta-1, alpha-10/beta-1 and alpha-11/beta-1 are receptors for collagen. Integrins alpha-1/beta-1 and alpha-2/beta-2 recognize the proline-hydroxylated sequence G-F-P-G-E-R in collagen. Integrins alpha-2/beta-1, alpha-3/beta-1, alpha-4/beta-1, alpha-5/beta-1, alpha-8/beta-1, alpha-10/beta-1, alpha-11/beta-1 and alpha-V/beta-1 are receptors for fibronectin. Alpha-4/beta-1 recognizes one or more domains within the alternatively spliced CS-1 and CS-5 regions of fibronectin. Integrin alpha-5/beta-1 is a receptor for fibrinogen. Integrin [...] |
| KEL    | Kell blood group glycoprotein; Zinc endopeptidase with endothelin-3-converting enzyme activity. Cleaves EDN1, EDN2 and EDN3, with a marked preference for EDN3; Blood group antigens                                                                                                                                                                                                                                                                                                                                                                                                                               |
| KLK1   | Kallikrein-1; Glandular kallikreins cleave Met-Lys and Arg-Ser bonds in kininogen to release Lys-bradykinin; Belongs to the peptidase S1 family. Kallikrein subfamily                                                                                                                                                                                                                                                                                                                                                                                                                                              |
| LAMP3  | Lysosome-associated membrane glycoprotein 3; May play a role in dendritic cell function and in adaptive immunity; CD molecules                                                                                                                                                                                                                                                                                                                                                                                                                                                                                     |
| LEFTY2 | Left-right determination factor 2; Required for left-right (L-R) asymmetry determination of organ systems in mammals. May play a role in endometrial bleeding                                                                                                                                                                                                                                                                                                                                                                                                                                                      |
| LGALS4 | Galectin-4; Galectin that binds lactose and a related range of sugars. May be involved in the assembly of adherens junctions; Galectins                                                                                                                                                                                                                                                                                                                                                                                                                                                                            |
| LGALS8 | Galectin 8; Galectins                                                                                                                                                                                                                                                                                                                                                                                                                                                                                                                                                                                              |

|        |                                                                                                                                                                                                                                                                                                                                                                                                                                                                                                                                                                                                                               |
|--------|-------------------------------------------------------------------------------------------------------------------------------------------------------------------------------------------------------------------------------------------------------------------------------------------------------------------------------------------------------------------------------------------------------------------------------------------------------------------------------------------------------------------------------------------------------------------------------------------------------------------------------|
| MET    | <p>Hepatocyte growth factor receptor; Receptor tyrosine kinase that transduces signals from the extracellular matrix into the cytoplasm by binding to hepatocyte growth factor/HGF ligand. Regulates many physiological processes including proliferation, scattering, morphogenesis and survival. Ligand binding at the cell surface induces autophosphorylation of MET on its intracellular domain that provides docking sites for downstream signaling molecules. Following activation by ligand, interacts with the PI3-kinase subunit PIK3R1, PLCG1, SRC, GRB2, STAT3 or the adapter GAB1. Recruitment of thes [...]</p> |
| MNDA   | <p>Myeloid cell nuclear differentiation antigen; May act as a transcriptional activator/repressor in the myeloid lineage. Plays a role in the granulocyte/monocyte cell- specific response to interferon. Stimulates the DNA binding of the transcriptional repressor protein YY1; Pyrin and HIN domain family</p>                                                                                                                                                                                                                                                                                                            |
| MUC13  | <p>Mucin-13; Epithelial and hemopoietic transmembrane mucin that may play a role in cell signaling; Mucins</p>                                                                                                                                                                                                                                                                                                                                                                                                                                                                                                                |
| NELL2  | <p>Protein kinase C-binding protein NELL2; Required for neuron survival through the modulation of MAPK pathways (By similarity). Involved in the regulation of hypothalamic GNRH secretion and the control of puberty (By similarity)</p>                                                                                                                                                                                                                                                                                                                                                                                     |
| NME3   | <p>Nucleoside diphosphate kinase 3; Major role in the synthesis of nucleoside triphosphates other than ATP. The ATP gamma phosphate is transferred to the NDP beta phosphate via a ping-pong mechanism, using a phosphorylated active-site intermediate. Probably has a role in normal hematopoiesis by inhibition of granulocyte differentiation and induction of apoptosis; NME/NM23 family</p>                                                                                                                                                                                                                             |
| NRCAM  | <p>Neuronal cell adhesion molecule; Cell adhesion protein that is required for normal responses to cell-cell contacts in brain and in the peripheral nervous system. Plays a role in neurite outgrowth in response to contactin binding. Plays a role in mediating cell-cell contacts between Schwann cells and axons. Plays a role in the formation and maintenance of the nodes of Ranvier on myelinated axons. Nodes of Ranvier contain clustered sodium channels that are crucial for the saltatory propagation of action potentials along myelinated axons. During development, nodes of Ranvier are formed by [...]</p> |
| PECAM1 | <p>Platelet endothelial cell adhesion molecule; Cell adhesion molecule which is required for leukocyte transendothelial migration (TEM) under most inflammatory conditions. Tyr-690 plays a critical role in TEM and is required for efficient trafficking of PECAM1 to and from the lateral border recycling compartment (LBRC) and is also essential for the LBRC membrane to be targeted around migrating leukocytes. Heterophilic interaction with CD177 plays a role in transendothelial migration of neutrophils. Homophilic ligation of PECAM1 prevents macrophage-mediated phagocytosis of neighboring viab [...]</p> |

|         |                                                                                                                                                                                                                                                                                                                                                                                                                                                                                                                                                                                                                                |
|---------|--------------------------------------------------------------------------------------------------------------------------------------------------------------------------------------------------------------------------------------------------------------------------------------------------------------------------------------------------------------------------------------------------------------------------------------------------------------------------------------------------------------------------------------------------------------------------------------------------------------------------------|
| PLAT    | Plasminogen activator, tissue type; Tissue-type plasminogen activator; Converts the abundant, but inactive, zymogen plasminogen to plasmin by hydrolyzing a single Arg-Val bond in plasminogen. By controlling plasmin-mediated proteolysis, it plays an important role in tissue remodeling and degradation, in cell migration and many other physiopathological events. Plays a direct role in facilitating neuronal migration                                                                                                                                                                                               |
| PODXL   | Podocalyxin; Involved in the regulation of both adhesion and cell morphology and cancer progression. Function as an anti-adhesive molecule that maintains an open filtration pathway between neighboring foot processes in the podocyte by charge repulsion. Acts as a pro-adhesive molecule, enhancing the adherence of cells to immobilized ligands, increasing the rate of migration and cell-cell contacts in an integrin-dependent manner. Induces the formation of apical actin-dependent microvilli. Involved in the formation of a preapical plasma membrane subdomain to set up initial epithelial polarisation [...] |
| PRSS27  | Serine protease 27                                                                                                                                                                                                                                                                                                                                                                                                                                                                                                                                                                                                             |
| PTPRM   | Receptor-type tyrosine-protein phosphatase mu; Involved in cell-cell adhesion through homophilic interactions. May play a key role in signal transduction and growth control; Fibronectin type III domain containing                                                                                                                                                                                                                                                                                                                                                                                                           |
| REG1A   | Lithostathine-1-alpha; Might act as an inhibitor of spontaneous calcium carbonate precipitation. May be associated with neuronal sprouting in brain, and with brain and pancreas regeneration; C-type lectin domain containing                                                                                                                                                                                                                                                                                                                                                                                                 |
| REG1B   | Lithostathine-1-beta; Might act as an inhibitor of spontaneous calcium carbonate precipitation. May be associated with neuronal sprouting in brain, and with brain and pancreas regeneration; C-type lectin domain containing                                                                                                                                                                                                                                                                                                                                                                                                  |
| S100A16 | Protein S100-A16; Calcium-binding protein. Binds one calcium ion per monomer. Can promote differentiation of adipocytes (in vitro) (By similarity). Overexpression in preadipocytes increases their proliferation, enhances adipogenesis and reduces insulin-stimulated glucose uptake (By similarity); Belongs to the S-100 family                                                                                                                                                                                                                                                                                            |
| SCARF2  | Scavenger receptor class F member 2; Probable adhesion protein, which mediates homophilic and heterophilic interactions. In contrast to SCARF1, it poorly mediates the binding and degradation of acetylated low density lipoprotein (Ac-LDL) (By similarity); Scavenger receptors                                                                                                                                                                                                                                                                                                                                             |
| SCG2    | Secretogranin-2; Secretogranin-2 is a neuroendocrine secretory granule protein, which is the precursor for biologically active peptides; Granins                                                                                                                                                                                                                                                                                                                                                                                                                                                                               |
| SCGN    | Secretagoin, EF-hand calcium binding protein; EF-hand domain containing                                                                                                                                                                                                                                                                                                                                                                                                                                                                                                                                                        |
| SELE    | E-selectin; Cell-surface glycoprotein having a role in immunoadhesion. Mediates in the adhesion of blood neutrophils in cytokine-activated endothelium through interaction with PSGL1/SELPLG. May have a role in capillary morphogenesis; Belongs to the selectin/LECAM family                                                                                                                                                                                                                                                                                                                                                 |
| SEMA3F  | Semaphorin-3F; May play a role in cell motility and cell adhesion; Immunoglobulin like domain containing                                                                                                                                                                                                                                                                                                                                                                                                                                                                                                                       |



|         |                                                                                                                                                                                                                                                                                                                                                                                                                                                                                                                                                                                                                      |
|---------|----------------------------------------------------------------------------------------------------------------------------------------------------------------------------------------------------------------------------------------------------------------------------------------------------------------------------------------------------------------------------------------------------------------------------------------------------------------------------------------------------------------------------------------------------------------------------------------------------------------------|
| SEMA4C  | Semaphorin-4C; Cell surface receptor for PLXNB2 that plays an important role in cell-cell signaling. PLXNB2 binding promotes downstream activation of RHOA and phosphorylation of ERBB2 at 'Tyr-1248'. Required for normal brain development, axon guidance and cell migration (By similarity). Probable signaling receptor which may play a role in myogenic differentiation through activation of the stress-activated MAPK cascade; Belongs to the semaphorin family                                                                                                                                              |
| SFTPA2  | Pulmonary surfactant-associated protein A2; In presence of calcium ions, it binds to surfactant phospholipids and contributes to lower the surface tension at the air-liquid interface in the alveoli of the mammalian lung and is essential for normal respiration; C-type lectin domain containing                                                                                                                                                                                                                                                                                                                 |
| SFTPD   | Pulmonary surfactant-associated protein D; Contributes to the lung's defense against inhaled microorganisms, organic antigens and toxins. Interacts with compounds such as bacterial lipopolysaccharides, oligosaccharides and fatty acids and modulates leukocyte action in immune response. May participate in the extracellular reorganization or turnover of pulmonary surfactant. Binds strongly maltose residues and to a lesser extent other alpha-glucosyl moieties; C-type lectin domain containing                                                                                                         |
| SLITRK2 | Slit and ntrk like family member 2; SLIT and NTRK-like protein 2; It is involved in synaptogenesis and promotes excitatory synapse differentiation. Suppresses neurite outgrowth (By similarity)                                                                                                                                                                                                                                                                                                                                                                                                                     |
| SPINK5  | Serine protease inhibitor Kazal-type 5; Serine protease inhibitor, probably important for the anti-inflammatory and/or antimicrobial protection of mucous epithelia. Contribute to the integrity and protective barrier function of the skin by regulating the activity of defense- activating and desquamation-involved proteases. Inhibits KLK5, it's major target, in a pH-dependent manner. Inhibits KLK7, KLK14 CASP14, and trypsin; Serine peptidase inhibitors, Kazal type                                                                                                                                    |
| STC1    | Stanniocalcin-1; Stimulates renal phosphate reabsorption, and could therefore prevent hypercalcemia                                                                                                                                                                                                                                                                                                                                                                                                                                                                                                                  |
| TDGF1   | Teratocarcinoma-derived growth factor 1; GPI-anchored cell membrane protein involved in Nodal signaling. Cell-associated TDGF1 acts as a Nodal coreceptor in cis. Shedding of TDGF1 by TMEM8A modulates Nodal signaling by allowing soluble TDGF1 to act as a Nodal coreceptor on other cells. Could play a role in the determination of the epiblastic cells that subsequently give rise to the mesoderm                                                                                                                                                                                                            |
| TGFBR2  | Transforming growth factor beta receptor 2; TGF-beta receptor type-2; Transmembrane serine/threonine kinase forming with the TGF-beta type I serine/threonine kinase receptor, TGFBR1, the non-promiscuous receptor for the TGF-beta cytokines TGFB1, TGFB2 and TGFB3. Transduces the TGFB1, TGFB2 and TGFB3 signal from the cell surface to the cytoplasm and is thus regulating a plethora of physiological and pathological processes including cell cycle arrest in epithelial and hematopoietic cells, control of mesenchymal cell proliferation and differentiation, wound healing, extracellular matrix [...] |
| ULBP2   | UL16-binding protein 2; Binds and activates the KLRK1/NKG2D receptor, mediating natural killer cell cytotoxicity; Belongs to the MHC class I family                                                                                                                                                                                                                                                                                                                                                                                                                                                                  |

---

|       |                                                                                                                                                                                                                                                                                                                                                                                                                                                                                                                  |
|-------|------------------------------------------------------------------------------------------------------------------------------------------------------------------------------------------------------------------------------------------------------------------------------------------------------------------------------------------------------------------------------------------------------------------------------------------------------------------------------------------------------------------|
| VAMP5 | Vesicle-associated membrane protein 5; May participate in trafficking events that are associated with myogenesis, such as myoblast fusion and/or GLUT4 trafficking; Belongs to the synaptobrevin family                                                                                                                                                                                                                                                                                                          |
| VTCN1 | V-set domain-containing T-cell activation inhibitor 1; Negatively regulates T-cell-mediated immune response by inhibiting T-cell activation, proliferation, cytokine production and development of cytotoxicity. When expressed on the cell surface of tumor macrophages, plays an important role, together with regulatory T-cells (Treg), in the suppression of tumor-associated antigen-specific T-cell immunity. Involved in promoting epithelial cell transformation; Immunoglobulin like domain containing |

---

**Supplementary Table 15. Associations of genetically predicted proteins with healthspan using IVW method and cis+trans SNPs.**

| <b>Protein</b> | <b>No. of SNPs</b> | <b>Beta</b> | <b>SE</b> | <b>Pval</b> |
|----------------|--------------------|-------------|-----------|-------------|
| AARSD1         | 3                  | -0.08       | 0.33      | 8.06E-01    |
| ABHD14B        | 3                  | -0.11       | 0.50      | 8.33E-01    |
| ABL1           | 1                  | -0.04       | 0.59      | 9.44E-01    |
| ACAA1          | 3                  | -0.36       | 0.39      | 3.56E-01    |
| ACAN           | 13                 | -0.65       | 0.20      | 1.14E-03    |
| ACE2           | 8                  | 0.22        | 0.25      | 3.80E-01    |
| ACOX1          | 1                  | 0.94        | 0.69      | 1.76E-01    |
| ACP5           | 10                 | -0.06       | 0.13      | 6.40E-01    |
| ACP6           | 2                  | 0.09        | 0.05      | 7.53E-02    |
| ACVRL1         | 3                  | -0.03       | 0.15      | 8.60E-01    |
| ACY1           | 3                  | -0.22       | 0.21      | 2.93E-01    |
| ADA            | 4                  | -0.03       | 0.08      | 7.36E-01    |
| ADA2           | 13                 | -0.39       | 0.15      | 8.35E-03    |
| ADAM15         | 8                  | 0.05        | 0.06      | 4.49E-01    |
| ADAM22         | 6                  | 0.02        | 0.08      | 8.58E-01    |
| ADAM23         | 5                  | 0.04        | 0.09      | 6.66E-01    |
| ADAM8          | 7                  | -0.22       | 0.10      | 3.24E-02    |
| ADAMTS13       | 10                 | 0.10        | 0.12      | 3.81E-01    |
| ADAMTS15       | 4                  | 0.22        | 0.32      | 4.78E-01    |
| ADAMTS16       | 1                  | 0.13        | 0.43      | 7.66E-01    |
| ADAMTS8        | 3                  | 0.25        | 0.11      | 2.18E-02    |
| ADGRB3         | 4                  | 0.00        | 0.05      | 9.54E-01    |
| ADGRE2         | 9                  | -0.38       | 0.14      | 5.33E-03    |
| ADGRE5         | 9                  | -0.47       | 0.18      | 8.21E-03    |
| ADGRG1         | 9                  | -0.14       | 0.21      | 5.07E-01    |
| ADGRG2         | 5                  | -0.83       | 0.33      | 1.24E-02    |
| ADH4           | 6                  | -0.48       | 0.26      | 6.73E-02    |
| ADM            | 1                  | -1.04       | 1.03      | 3.14E-01    |
| AFP            | 19                 | 0.27        | 0.11      | 1.43E-02    |
| AGER           | 12                 | 0.21        | 0.17      | 2.26E-01    |
| AGR2           | 4                  | -0.65       | 0.34      | 5.13E-02    |
| AGR3           | 2                  | -0.65       | 0.53      | 2.20E-01    |
| AGRN           | 6                  | -0.04       | 0.12      | 7.77E-01    |
| AGRP           | 9                  | 0.13        | 0.25      | 6.03E-01    |
| AGXT           | 11                 | -0.26       | 0.15      | 7.57E-02    |
| AHCY           | 1                  | 0.01        | 0.14      | 9.46E-01    |
| AHSP           | 8                  | -0.32       | 0.25      | 1.96E-01    |
| AIF1           | 1                  | 0.25        | 0.44      | 5.66E-01    |
| AIFM1          | 2                  | 0.19        | 0.66      | 7.73E-01    |
| AKR1B1         | 3                  | -0.03       | 0.31      | 9.13E-01    |
| AKR1C4         | 1                  | 0.95        | 0.94      | 3.10E-01    |
| AKT1S1         | 3                  | -0.15       | 0.45      | 7.43E-01    |
| AKT3           | 2                  | 0.12        | 0.66      | 8.59E-01    |
| ALCAM          | 11                 | 0.07        | 0.19      | 7.09E-01    |
| ALDH1A1        | 3                  | 0.02        | 0.38      | 9.51E-01    |
| ALDH3A1        | 1                  | -0.05       | 0.11      | 6.17E-01    |
| ALPP           | 10                 | 0.07        | 0.10      | 5.26E-01    |
| AMBP           | 9                  | 0.25        | 0.18      | 1.76E-01    |
| AMIGO2         | 12                 | 0.34        | 0.13      | 9.47E-03    |
| AMN            | 5                  | 0.03        | 0.07      | 6.07E-01    |
| AMY2A          | 7                  | 0.28        | 0.12      | 2.25E-02    |
| AMY2B          | 8                  | 0.14        | 0.11      | 2.15E-01    |

|          |    |       |      |          |
|----------|----|-------|------|----------|
| ANG      | 3  | 0.02  | 0.11 | 8.69E-01 |
| ANGPT1   | 17 | 0.22  | 0.14 | 1.26E-01 |
| ANGPT2   | 6  | -0.15 | 0.20 | 4.54E-01 |
| ANGPTL1  | 6  | 0.16  | 0.16 | 2.92E-01 |
| ANGPTL2  | 5  | -0.10 | 0.29 | 7.25E-01 |
| ANGPTL3  | 5  | 0.59  | 0.33 | 7.59E-02 |
| ANGPTL4  | 1  | -0.16 | 0.18 | 3.75E-01 |
| ANGPTL7  | 6  | -0.19 | 0.11 | 1.03E-01 |
| ANKRD54  | 1  | -1.01 | 0.73 | 1.66E-01 |
| ANPEP    | 7  | -0.03 | 0.12 | 8.15E-01 |
| ANXA11   | 2  | -0.33 | 0.60 | 5.76E-01 |
| ANXA3    | 5  | -0.22 | 0.33 | 5.04E-01 |
| ANXA4    | 2  | -0.18 | 0.57 | 7.57E-01 |
| ANXA5    | 1  | -1.10 | 0.45 | 1.43E-02 |
| AOC1     | 1  | 0.12  | 0.18 | 5.06E-01 |
| AOC3     | 10 | 0.04  | 0.09 | 6.46E-01 |
| APBB1IP  | 5  | -0.13 | 0.17 | 4.46E-01 |
| APEX1    | 3  | 0.08  | 0.12 | 4.89E-01 |
| APLP1    | 4  | -0.79 | 0.34 | 2.19E-02 |
| APOH     | 1  | 0.08  | 0.10 | 4.01E-01 |
| APOM     | 8  | 0.12  | 0.15 | 4.15E-01 |
| APP      | 15 | 0.27  | 0.16 | 9.42E-02 |
| APRT     | 5  | 0.16  | 0.31 | 6.12E-01 |
| AREG     | 3  | 0.03  | 0.26 | 9.02E-01 |
| ARG1     | 5  | 0.16  | 0.21 | 4.28E-01 |
| ARHGAP1  | 2  | 0.11  | 0.47 | 8.20E-01 |
| ARHGAP25 | 2  | -0.22 | 0.45 | 6.29E-01 |
| ARSA     | 7  | 0.00  | 0.07 | 9.84E-01 |
| ARSB     | 10 | -0.14 | 0.14 | 2.92E-01 |
| ART3     | 4  | -0.23 | 0.42 | 5.82E-01 |
| ARTN     | 1  | -0.29 | 0.76 | 7.04E-01 |
| ASAH2    | 15 | 0.00  | 0.08 | 9.93E-01 |
| ASGR1    | 6  | 0.20  | 0.19 | 2.93E-01 |
| ATF2     | 1  | -0.13 | 0.41 | 7.59E-01 |
| ATG4A    | 3  | 0.62  | 0.49 | 2.09E-01 |
| ATOX1    | 3  | 0.50  | 0.49 | 3.13E-01 |
| ATP5IF1  | 5  | 0.35  | 0.33 | 2.81E-01 |
| ATP6V1F  | 1  | -0.05 | 0.77 | 9.44E-01 |
| ATXN10   | 5  | 0.10  | 0.31 | 7.59E-01 |
| AXIN1    | 3  | 0.35  | 0.52 | 5.03E-01 |
| AXL      | 6  | -0.33 | 0.18 | 6.58E-02 |
| AZU1     | 2  | -0.83 | 0.61 | 1.71E-01 |
| B4GALT1  | 7  | -0.03 | 0.13 | 8.11E-01 |
| B4GAT1   | 8  | -0.05 | 0.14 | 7.22E-01 |
| BACH1    | 3  | 0.41  | 0.53 | 4.40E-01 |
| BAG3     | 4  | 0.69  | 0.35 | 4.58E-02 |
| BAIAP2   | 5  | -0.01 | 0.36 | 9.78E-01 |
| BAMBI    | 1  | 0.05  | 0.75 | 9.44E-01 |
| BANK1    | 3  | 0.20  | 0.33 | 5.52E-01 |
| BAX      | 2  | 0.04  | 0.61 | 9.42E-01 |
| BCAM     | 14 | -0.16 | 0.10 | 1.19E-01 |
| BCAN     | 7  | -0.10 | 0.17 | 5.53E-01 |
| BCL2L11  | 10 | 0.21  | 0.11 | 6.80E-02 |
| BCR      | 1  | 0.88  | 0.78 | 2.55E-01 |

|          |    |       |      |          |
|----------|----|-------|------|----------|
| BGN      | 10 | -0.23 | 0.21 | 2.76E-01 |
| BID      | 2  | -0.40 | 0.48 | 3.98E-01 |
| BIN2     | 2  | 0.00  | 0.58 | 9.98E-01 |
| BIRC2    | 4  | 0.57  | 0.45 | 2.03E-01 |
| BLMH     | 3  | 0.01  | 0.09 | 8.96E-01 |
| BLVRB    | 2  | 0.03  | 0.24 | 9.07E-01 |
| BMP4     | 5  | 0.07  | 0.31 | 8.25E-01 |
| BMP6     | 14 | 0.26  | 0.14 | 6.40E-02 |
| BOC      | 8  | 0.13  | 0.21 | 5.61E-01 |
| BPIFB1   | 14 | 0.00  | 0.10 | 1.00E+00 |
| BRK1     | 6  | -0.11 | 0.21 | 5.81E-01 |
| BSG      | 10 | -0.01 | 0.20 | 9.71E-01 |
| BST1     | 4  | -0.05 | 0.05 | 3.28E-01 |
| BST2     | 11 | -0.43 | 0.20 | 3.58E-02 |
| BTC      | 3  | 0.02  | 0.12 | 8.55E-01 |
| BTN2A1   | 6  | -0.29 | 0.15 | 5.23E-02 |
| BTN3A2   | 3  | 0.10  | 0.07 | 1.95E-01 |
| C19orf12 | 5  | 0.42  | 0.32 | 1.87E-01 |
| C1QA     | 13 | -0.03 | 0.11 | 7.55E-01 |
| C1QTNF1  | 4  | 0.22  | 0.18 | 2.29E-01 |
| C2       | 2  | -0.57 | 0.41 | 1.62E-01 |
| C2CD2L   | 1  | -1.11 | 0.90 | 2.19E-01 |
| C4BPB    | 9  | -0.03 | 0.14 | 8.45E-01 |
| CA1      | 4  | 0.05  | 0.29 | 8.59E-01 |
| CA11     | 2  | -0.85 | 0.29 | 3.73E-03 |
| CA12     | 6  | -0.42 | 0.15 | 6.11E-03 |
| CA13     | 3  | -0.14 | 0.18 | 4.24E-01 |
| CA14     | 4  | 0.16  | 0.24 | 5.10E-01 |
| CA2      | 2  | 0.12  | 0.44 | 7.82E-01 |
| CA3      | 6  | -0.12 | 0.20 | 5.61E-01 |
| CA4      | 9  | 0.08  | 0.13 | 5.15E-01 |
| CA5A     | 5  | 0.01  | 0.08 | 9.05E-01 |
| CA6      | 12 | -0.03 | 0.07 | 6.47E-01 |
| CA9      | 5  | -0.55 | 0.23 | 1.40E-02 |
| CALB1    | 3  | -0.35 | 0.32 | 2.78E-01 |
| CALCA    | 4  | -0.05 | 0.35 | 8.88E-01 |
| CALCOCO1 | 4  | 0.17  | 0.34 | 6.13E-01 |
| CAMKK1   | 3  | 0.01  | 0.17 | 9.53E-01 |
| CANT1    | 6  | -0.66 | 0.24 | 5.86E-03 |
| CAPG     | 2  | -0.04 | 0.06 | 5.38E-01 |
| CARHSP1  | 1  | 0.35  | 0.62 | 5.68E-01 |
| CASP1    | 1  | -0.11 | 0.19 | 5.64E-01 |
| CASP10   | 3  | 0.46  | 0.23 | 4.97E-02 |
| CASP2    | 2  | -0.38 | 0.44 | 3.90E-01 |
| CASP3    | 2  | -0.02 | 0.37 | 9.53E-01 |
| CASP8    | 3  | 0.37  | 0.21 | 7.82E-02 |
| CBLIF    | 11 | 0.15  | 0.10 | 1.47E-01 |
| CBLN4    | 5  | 0.10  | 0.21 | 6.47E-01 |
| CC2D1A   | 2  | -0.27 | 0.54 | 6.18E-01 |
| CCDC80   | 5  | -0.04 | 0.22 | 8.37E-01 |
| CCL11    | 8  | 0.26  | 0.17 | 1.21E-01 |
| CCL13    | 13 | 0.09  | 0.13 | 4.99E-01 |
| CCL14    | 6  | 0.18  | 0.10 | 7.80E-02 |
| CCL15    | 4  | 0.34  | 0.23 | 1.49E-01 |

|         |    |       |      |          |
|---------|----|-------|------|----------|
| CCL16   | 7  | -0.06 | 0.06 | 3.71E-01 |
| CCL17   | 13 | 0.28  | 0.10 | 7.70E-03 |
| CCL18   | 3  | -0.13 | 0.10 | 2.06E-01 |
| CCL19   | 4  | -0.37 | 0.33 | 2.72E-01 |
| CCL2    | 8  | 0.13  | 0.15 | 3.74E-01 |
| CCL20   | 5  | -0.35 | 0.28 | 2.02E-01 |
| CCL21   | 10 | -0.24 | 0.21 | 2.53E-01 |
| CCL22   | 7  | -0.24 | 0.19 | 2.10E-01 |
| CCL23   | 8  | 0.03  | 0.12 | 7.68E-01 |
| CCL24   | 10 | 0.03  | 0.06 | 5.98E-01 |
| CCL25   | 7  | -0.10 | 0.06 | 1.21E-01 |
| CCL26   | 6  | 0.02  | 0.16 | 9.02E-01 |
| CCL27   | 7  | 0.27  | 0.19 | 1.43E-01 |
| CCL28   | 18 | 0.41  | 0.14 | 3.13E-03 |
| CCL3    | 6  | -0.80 | 0.34 | 1.98E-02 |
| CCL4    | 5  | -0.09 | 0.12 | 4.36E-01 |
| CCL5    | 9  | 0.15  | 0.17 | 3.96E-01 |
| CCL7    | 4  | 0.26  | 0.15 | 7.75E-02 |
| CCL8    | 9  | -0.07 | 0.06 | 2.17E-01 |
| CCN1    | 11 | -0.58 | 0.21 | 5.02E-03 |
| CCN2    | 17 | 0.18  | 0.12 | 1.25E-01 |
| CCN3    | 3  | 0.14  | 0.20 | 4.88E-01 |
| CCN4    | 12 | -0.08 | 0.11 | 4.41E-01 |
| CCN5    | 1  | 2.00  | 1.03 | 5.13E-02 |
| CCS     | 1  | -0.07 | 0.10 | 4.87E-01 |
| CD109   | 6  | 0.16  | 0.21 | 4.46E-01 |
| CD14    | 5  | -0.23 | 0.16 | 1.40E-01 |
| CD160   | 14 | -0.02 | 0.10 | 8.20E-01 |
| CD163   | 18 | -0.23 | 0.10 | 3.18E-02 |
| CD164   | 9  | -0.14 | 0.20 | 4.98E-01 |
| CD177   | 3  | 0.13  | 0.10 | 2.11E-01 |
| CD1C    | 17 | -0.35 | 0.13 | 8.19E-03 |
| CD200   | 7  | -0.27 | 0.19 | 1.56E-01 |
| CD200R1 | 9  | -0.04 | 0.06 | 4.65E-01 |
| CD207   | 15 | 0.01  | 0.09 | 9.40E-01 |
| CD209   | 8  | -0.16 | 0.06 | 4.76E-03 |
| CD22    | 19 | -0.04 | 0.12 | 7.23E-01 |
| CD244   | 13 | -0.07 | 0.10 | 4.82E-01 |
| CD27    | 7  | -0.37 | 0.17 | 2.88E-02 |
| CD274   | 7  | -0.01 | 0.15 | 9.44E-01 |
| CD276   | 7  | -0.13 | 0.06 | 3.54E-02 |
| CD28    | 9  | -0.07 | 0.15 | 6.15E-01 |
| CD2AP   | 1  | -0.05 | 0.78 | 9.44E-01 |
| CD300C  | 13 | -0.24 | 0.10 | 2.16E-02 |
| CD300E  | 10 | -0.01 | 0.12 | 9.52E-01 |
| CD300LF | 9  | -0.02 | 0.05 | 6.99E-01 |
| CD300LG | 12 | 0.28  | 0.11 | 1.14E-02 |
| CD302   | 6  | -0.25 | 0.15 | 9.23E-02 |
| CD33    | 6  | -0.19 | 0.39 | 6.22E-01 |
| CD34    | 3  | 0.32  | 0.13 | 1.29E-02 |
| CD38    | 2  | 0.05  | 0.14 | 7.12E-01 |
| CD4     | 4  | 0.10  | 0.14 | 4.48E-01 |
| CD40    | 9  | 0.17  | 0.12 | 1.64E-01 |
| CD40LG  | 12 | 0.10  | 0.19 | 6.18E-01 |

|          |    |       |      |          |
|----------|----|-------|------|----------|
| CD46     | 7  | 0.36  | 0.28 | 2.05E-01 |
| CD48     | 10 | -0.10 | 0.07 | 1.43E-01 |
| CD5      | 8  | 0.10  | 0.20 | 6.09E-01 |
| CD55     | 6  | 0.01  | 0.11 | 8.91E-01 |
| CD58     | 11 | 0.10  | 0.10 | 3.15E-01 |
| CD59     | 5  | 0.22  | 0.19 | 2.55E-01 |
| CD6      | 10 | 0.01  | 0.06 | 8.40E-01 |
| CD63     | 8  | 0.07  | 0.19 | 7.03E-01 |
| CD69     | 5  | 0.10  | 0.27 | 7.19E-01 |
| CD70     | 3  | -0.12 | 0.06 | 5.24E-02 |
| CD74     | 6  | -0.86 | 0.19 | 5.59E-06 |
| CD79B    | 16 | 0.11  | 0.14 | 4.14E-01 |
| CD83     | 12 | -0.09 | 0.17 | 5.93E-01 |
| CD84     | 11 | -0.11 | 0.16 | 5.16E-01 |
| CD8A     | 3  | -0.08 | 0.18 | 6.65E-01 |
| CD93     | 5  | -0.37 | 0.35 | 2.84E-01 |
| CD99     | 4  | -0.14 | 0.34 | 6.74E-01 |
| CD99L2   | 8  | -0.06 | 0.20 | 7.59E-01 |
| CDC27    | 2  | -0.59 | 0.51 | 2.46E-01 |
| CDC37    | 2  | 0.00  | 0.58 | 9.94E-01 |
| CDCP1    | 7  | -0.09 | 0.17 | 5.83E-01 |
| CDH1     | 6  | 0.16  | 0.09 | 8.48E-02 |
| CDH15    | 3  | -0.12 | 0.16 | 4.24E-01 |
| CDH17    | 11 | 0.17  | 0.08 | 3.51E-02 |
| CDH2     | 13 | 0.24  | 0.19 | 2.26E-01 |
| CDH3     | 7  | -0.34 | 0.27 | 2.14E-01 |
| CDH5     | 12 | -0.03 | 0.08 | 7.01E-01 |
| CDH6     | 6  | -0.13 | 0.09 | 1.74E-01 |
| CDHR1    | 4  | -0.14 | 0.19 | 4.71E-01 |
| CDHR2    | 7  | -0.02 | 0.30 | 9.38E-01 |
| CDHR5    | 8  | -0.06 | 0.09 | 5.18E-01 |
| CDKN1A   | 5  | 0.17  | 0.26 | 5.12E-01 |
| CDKN2D   | 4  | 0.13  | 0.32 | 6.87E-01 |
| CDFNF    | 1  | -0.06 | 0.12 | 6.42E-01 |
| CDON     | 4  | -0.57 | 0.31 | 7.15E-02 |
| CDSN     | 18 | -0.25 | 0.17 | 1.45E-01 |
| CEACAM1  | 6  | -0.20 | 0.16 | 2.31E-01 |
| CEACAM21 | 2  | -1.33 | 0.91 | 1.45E-01 |
| CEACAM3  | 2  | -0.50 | 0.41 | 2.25E-01 |
| CEACAM5  | 10 | -0.08 | 0.09 | 3.58E-01 |
| CEACAM8  | 10 | -0.27 | 0.17 | 1.14E-01 |
| CEBPB    | 3  | 0.37  | 0.48 | 4.41E-01 |
| CELA3A   | 14 | -0.01 | 0.12 | 9.09E-01 |
| CEP20    | 4  | -0.15 | 0.30 | 6.20E-01 |
| CEP43    | 6  | 0.39  | 0.34 | 2.46E-01 |
| CEP85    | 2  | 0.07  | 0.37 | 8.58E-01 |
| CERT     | 4  | 0.32  | 0.38 | 4.06E-01 |
| CES1     | 16 | -0.15 | 0.19 | 4.26E-01 |
| CES2     | 2  | -0.03 | 0.35 | 9.43E-01 |
| CES3     | 9  | -0.33 | 0.17 | 4.95E-02 |
| CETN2    | 3  | -0.16 | 0.40 | 6.86E-01 |
| CFC1     | 6  | 1.07  | 0.34 | 1.42E-03 |
| CGA      | 1  | 1.03  | 1.26 | 4.15E-01 |
| CGREF1   | 3  | 0.12  | 0.08 | 1.33E-01 |

|              |    |       |      |          |
|--------------|----|-------|------|----------|
| CHAC2        | 2  | 0.83  | 0.34 | 1.54E-02 |
| CHGB         | 5  | 0.08  | 0.08 | 3.54E-01 |
| CHI3L1       | 5  | -0.15 | 0.09 | 7.56E-02 |
| CHIT1        | 3  | 0.06  | 0.06 | 2.98E-01 |
| CHL1         | 6  | -0.02 | 0.14 | 8.66E-01 |
| CHMP1A       | 4  | -0.48 | 0.38 | 1.99E-01 |
| CHRD1        | 3  | 0.07  | 0.51 | 8.92E-01 |
| CHRD2        | 3  | 0.33  | 0.41 | 4.18E-01 |
| CIAPIN1      | 4  | 0.08  | 0.43 | 8.43E-01 |
| CKAP4        | 4  | 0.10  | 0.11 | 3.84E-01 |
| KMT1A_CKMT11 | 6  | -0.32 | 0.27 | 2.40E-01 |
| CLC          | 8  | 0.40  | 0.20 | 4.64E-02 |
| CLEC10A      | 9  | -0.17 | 0.09 | 4.31E-02 |
| CLEC11A      | 5  | 0.28  | 0.16 | 8.27E-02 |
| CLEC14A      | 8  | 0.20  | 0.15 | 1.72E-01 |
| CLEC1A       | 7  | 0.00  | 0.10 | 9.70E-01 |
| CLEC1B       | 9  | 0.04  | 0.19 | 8.17E-01 |
| CLEC4A       | 12 | -0.02 | 0.09 | 7.77E-01 |
| CLEC4C       | 25 | 0.06  | 0.05 | 2.60E-01 |
| CLEC4D       | 10 | -0.03 | 0.08 | 6.74E-01 |
| CLEC4G       | 11 | -0.27 | 0.13 | 3.53E-02 |
| CLEC5A       | 10 | 0.12  | 0.14 | 4.07E-01 |
| CLEC6A       | 12 | -0.15 | 0.09 | 7.51E-02 |
| CLEC7A       | 3  | -0.09 | 0.06 | 1.16E-01 |
| CLIP2        | 2  | 0.14  | 0.36 | 6.92E-01 |
| CLMP         | 4  | -0.19 | 0.14 | 1.71E-01 |
| CLPS         | 7  | -0.03 | 0.09 | 7.45E-01 |
| CLSPN        | 1  | -0.30 | 0.48 | 5.42E-01 |
| CLSTN2       | 3  | 0.11  | 0.12 | 3.87E-01 |
| CLTA         | 1  | 0.01  | 0.43 | 9.87E-01 |
| CLUL1        | 9  | 0.05  | 0.09 | 5.82E-01 |
| CNDP1        | 7  | -0.27 | 0.11 | 1.43E-02 |
| CNPY2        | 1  | 0.49  | 0.36 | 1.77E-01 |
| CNPY4        | 3  | 0.04  | 0.26 | 8.92E-01 |
| CNST         | 4  | 0.26  | 0.47 | 5.89E-01 |
| CNTN1        | 6  | -0.14 | 0.13 | 2.77E-01 |
| CNTN2        | 6  | -0.08 | 0.06 | 1.86E-01 |
| CNTN3        | 15 | 0.14  | 0.13 | 2.86E-01 |
| CNTN4        | 9  | 0.13  | 0.15 | 3.82E-01 |
| CNTN5        | 6  | -0.01 | 0.11 | 9.32E-01 |
| CNTNAP2      | 4  | -0.02 | 0.09 | 8.52E-01 |
| COL18A1      | 4  | 0.13  | 0.26 | 6.17E-01 |
| COL1A1       | 9  | 0.36  | 0.22 | 1.07E-01 |
| COL4A1       | 9  | 0.28  | 0.14 | 4.40E-02 |
| COL6A3       | 4  | -0.06 | 0.36 | 8.67E-01 |
| COL9A1       | 4  | -0.12 | 0.26 | 6.39E-01 |
| COLEC12      | 4  | 0.20  | 0.30 | 5.01E-01 |
| COMP         | 6  | -0.43 | 0.17 | 1.26E-02 |
| COMT         | 2  | 0.02  | 0.11 | 8.47E-01 |
| CORO1A       | 3  | -0.11 | 0.47 | 8.20E-01 |
| COX5B        | 5  | 0.23  | 0.29 | 4.31E-01 |
| CPA1         | 17 | -0.07 | 0.14 | 6.01E-01 |
| CPA2         | 4  | -0.17 | 0.13 | 1.79E-01 |
| CPB1         | 10 | 0.08  | 0.15 | 5.70E-01 |



|         |    |       |      |          |
|---------|----|-------|------|----------|
| CPE     | 7  | 0.30  | 0.17 | 7.59E-02 |
| CPM     | 9  | -0.67 | 0.24 | 4.69E-03 |
| CPPED1  | 1  | -0.04 | 0.08 | 6.46E-01 |
| CPVL    | 11 | -0.09 | 0.07 | 1.81E-01 |
| CPXM1   | 18 | 0.18  | 0.11 | 1.09E-01 |
| CR2     | 22 | -0.07 | 0.13 | 6.02E-01 |
| CRACR2A | 4  | -0.35 | 0.30 | 2.48E-01 |
| CRADD   | 4  | 0.29  | 0.42 | 4.90E-01 |
| CREG1   | 10 | -0.03 | 0.17 | 8.60E-01 |
| CRELD2  | 11 | -0.21 | 0.13 | 1.23E-01 |
| CRH     | 20 | 0.00  | 0.11 | 9.64E-01 |
| CRHBP   | 5  | -0.12 | 0.08 | 1.49E-01 |
| CRIM1   | 4  | 0.61  | 0.36 | 8.68E-02 |
| CRIP2   | 3  | -0.26 | 0.28 | 3.45E-01 |
| CRISP2  | 12 | -0.06 | 0.09 | 5.42E-01 |
| CRKL    | 1  | 0.06  | 0.78 | 9.34E-01 |
| CRLF1   | 6  | -0.11 | 0.34 | 7.47E-01 |
| CRNN    | 3  | -0.04 | 0.08 | 6.56E-01 |
| CRTAC1  | 2  | -0.01 | 0.06 | 9.22E-01 |
| CRTAM   | 12 | 0.00  | 0.13 | 9.98E-01 |
| CSF1    | 3  | -0.26 | 0.24 | 2.72E-01 |
| CSF2RA  | 1  | 0.49  | 0.64 | 4.47E-01 |
| CSF3    | 2  | -0.01 | 0.26 | 9.82E-01 |
| CST3    | 6  | -0.03 | 0.17 | 8.74E-01 |
| CST5    | 13 | -0.02 | 0.06 | 7.66E-01 |
| CST6    | 14 | 0.11  | 0.15 | 4.78E-01 |
| CST7    | 10 | -0.01 | 0.07 | 8.25E-01 |
| CTF1    | 2  | 0.16  | 0.66 | 8.13E-01 |
| CTRB1   | 11 | 0.00  | 0.09 | 9.59E-01 |
| CTRC    | 11 | 0.00  | 0.08 | 9.87E-01 |
| CTSB    | 7  | 0.12  | 0.09 | 1.79E-01 |
| CTSC    | 7  | -0.07 | 0.08 | 4.10E-01 |
| CTSD    | 6  | -0.15 | 0.14 | 2.81E-01 |
| CTSF    | 14 | -0.13 | 0.13 | 2.92E-01 |
| CTSH    | 1  | -0.32 | 0.57 | 5.78E-01 |
| CTSL    | 16 | -0.30 | 0.15 | 4.80E-02 |
| CTSO    | 9  | -0.43 | 0.17 | 1.34E-02 |
| CTSS    | 7  | 0.19  | 0.27 | 4.90E-01 |
| CTSV    | 17 | 0.28  | 0.14 | 5.08E-02 |
| CTSZ    | 9  | 0.07  | 0.10 | 4.59E-01 |
| CX3CL1  | 5  | 0.15  | 0.33 | 6.46E-01 |
| CXADR   | 5  | 0.08  | 0.20 | 6.88E-01 |
| CXCL1   | 4  | 0.04  | 0.08 | 6.11E-01 |
| CXCL10  | 3  | -0.13 | 0.16 | 4.22E-01 |
| CXCL11  | 6  | -0.32 | 0.20 | 9.97E-02 |
| CXCL12  | 9  | -0.16 | 0.20 | 4.30E-01 |
| CXCL13  | 7  | -0.60 | 0.29 | 3.87E-02 |
| CXCL14  | 2  | -0.58 | 0.56 | 2.98E-01 |
| CXCL16  | 11 | -0.12 | 0.16 | 4.76E-01 |
| CXCL17  | 5  | -0.04 | 0.36 | 9.20E-01 |
| CXCL3   | 3  | 0.88  | 0.40 | 2.92E-02 |
| CXCL5   | 9  | -0.04 | 0.10 | 7.01E-01 |
| CXCL6   | 7  | 0.00  | 0.09 | 9.54E-01 |
| CXCL8   | 7  | 0.15  | 0.20 | 4.48E-01 |

|               |    |       |      |          |
|---------------|----|-------|------|----------|
| CXCL9         | 5  | -0.49 | 0.24 | 4.21E-02 |
| DAB2          | 3  | 0.15  | 0.48 | 7.55E-01 |
| DAG1          | 3  | 0.41  | 0.55 | 4.56E-01 |
| DAPP1         | 2  | -1.02 | 0.42 | 1.56E-02 |
| DARS1         | 5  | 0.28  | 0.33 | 4.02E-01 |
| DBI           | 3  | -0.18 | 0.18 | 3.18E-01 |
| DBNL          | 4  | -0.47 | 0.44 | 2.91E-01 |
| DCBLD2        | 15 | -0.15 | 0.14 | 2.75E-01 |
| DCN           | 1  | -1.40 | 0.81 | 8.33E-02 |
| DCTN1         | 1  | -1.60 | 0.73 | 2.92E-02 |
| DCTN2         | 2  | 0.22  | 0.69 | 7.54E-01 |
| DCTPP1        | 6  | -0.35 | 0.27 | 2.03E-01 |
| DCXR          | 6  | -0.43 | 0.30 | 1.53E-01 |
| DDAH1         | 5  | -0.38 | 0.24 | 1.14E-01 |
| DDC           | 6  | 0.08  | 0.13 | 5.02E-01 |
| DDR1          | 11 | 0.12  | 0.11 | 3.02E-01 |
| DDX58         | 1  | 0.00  | 0.19 | 9.94E-01 |
| DECR1         | 3  | 0.34  | 0.33 | 2.96E-01 |
| DEFA1_DEFA1B  | 13 | -0.24 | 0.19 | 2.05E-01 |
| DEFB4A_DEFB4B | 3  | 0.25  | 0.35 | 4.70E-01 |
| DFFA          | 2  | 0.54  | 0.57 | 3.39E-01 |
| DIABLO        | 3  | -0.43 | 0.54 | 4.28E-01 |
| DKK1          | 9  | 0.10  | 0.17 | 5.59E-01 |
| DKK3          | 7  | 0.09  | 0.12 | 4.69E-01 |
| DKK4          | 6  | 0.25  | 0.16 | 1.14E-01 |
| DKKL1         | 4  | -0.05 | 0.04 | 2.20E-01 |
| DLK1          | 5  | 0.01  | 0.10 | 9.31E-01 |
| DLL1          | 6  | -0.12 | 0.22 | 5.94E-01 |
| DNAJA2        | 1  | 0.04  | 0.81 | 9.56E-01 |
| DNAJB1        | 5  | -0.37 | 0.34 | 2.76E-01 |
| DNAJB8        | 1  | -1.45 | 0.61 | 1.79E-02 |
| DNER          | 7  | 0.20  | 0.16 | 2.26E-01 |
| DNMBP         | 3  | -0.45 | 0.37 | 2.20E-01 |
| DNPH1         | 1  | 0.04  | 0.17 | 8.08E-01 |
| DOK2          | 4  | 0.45  | 0.39 | 2.48E-01 |
| DPEP1         | 5  | -0.22 | 0.28 | 4.25E-01 |
| DPEP2         | 3  | -0.04 | 0.17 | 7.96E-01 |
| DPP10         | 5  | 0.04  | 0.16 | 7.78E-01 |
| DPP4          | 5  | -0.40 | 0.19 | 4.09E-02 |
| DPP6          | 7  | -0.15 | 0.15 | 3.18E-01 |
| DPP7          | 6  | 0.02  | 0.19 | 9.26E-01 |
| DPT           | 2  | 0.07  | 0.15 | 6.32E-01 |
| DPY30         | 2  | 0.30  | 0.64 | 6.42E-01 |
| DRAXIN        | 15 | -0.27 | 0.13 | 4.33E-02 |
| DRG2          | 3  | 0.62  | 0.35 | 7.86E-02 |
| DSC2          | 9  | -0.31 | 0.16 | 5.04E-02 |
| DSG2          | 10 | -0.01 | 0.13 | 9.68E-01 |
| DSG3          | 17 | -0.19 | 0.12 | 1.16E-01 |
| DSG4          | 22 | 0.27  | 0.14 | 5.65E-02 |
| DTX3          | 3  | 0.42  | 0.26 | 1.01E-01 |
| DUSP3         | 2  | -0.65 | 0.53 | 2.23E-01 |
| EBAG9         | 5  | 0.13  | 0.34 | 7.02E-01 |
| EBI3_IL27     | 17 | -0.29 | 0.14 | 3.43E-02 |
| ECE1          | 5  | -0.61 | 0.23 | 7.32E-03 |

|        |    |       |      |          |
|--------|----|-------|------|----------|
| EDA2R  | 3  | 1.36  | 0.56 | 1.56E-02 |
| EDAR   | 21 | -0.02 | 0.09 | 8.61E-01 |
| EDIL3  | 3  | 0.01  | 0.28 | 9.62E-01 |
| EFEMP1 | 4  | -0.23 | 0.24 | 3.32E-01 |
| EFNA1  | 4  | 0.25  | 0.15 | 9.35E-02 |
| EFNA4  | 5  | -1.11 | 0.28 | 7.09E-05 |
| EGF    | 8  | 0.30  | 0.23 | 1.86E-01 |
| EGFL7  | 18 | -0.13 | 0.14 | 3.68E-01 |
| EGFR   | 5  | -0.11 | 0.35 | 7.54E-01 |
| EGLN1  | 4  | 0.00  | 0.28 | 9.87E-01 |
| EIF4B  | 3  | -0.21 | 0.42 | 6.21E-01 |
| EIF4G1 | 3  | 0.00  | 0.42 | 9.92E-01 |
| ELOA   | 2  | -0.14 | 0.34 | 6.82E-01 |
| ENAH   | 1  | -0.28 | 0.47 | 5.49E-01 |
| ENG    | 8  | 0.16  | 0.09 | 8.59E-02 |
| ENO1   | 4  | 0.04  | 0.27 | 8.82E-01 |
| ENO2   | 5  | -0.10 | 0.26 | 7.03E-01 |
| ENPP2  | 8  | 0.10  | 0.17 | 5.47E-01 |
| ENPP5  | 6  | 0.01  | 0.07 | 8.24E-01 |
| ENPP7  | 6  | -0.04 | 0.05 | 4.90E-01 |
| ENTPD2 | 2  | -1.32 | 0.68 | 5.19E-02 |
| ENTPD5 | 9  | 0.14  | 0.09 | 1.35E-01 |
| ENTPD6 | 8  | -0.18 | 0.05 | 1.23E-03 |
| EPCAM  | 13 | 0.11  | 0.13 | 4.02E-01 |
| EPHA1  | 7  | 0.07  | 0.19 | 7.12E-01 |
| EPHA2  | 6  | 0.06  | 0.26 | 8.18E-01 |
| EPHB4  | 9  | 0.28  | 0.13 | 3.37E-02 |
| EPHB6  | 4  | -0.10 | 0.16 | 5.39E-01 |
| EPO    | 9  | 0.11  | 0.19 | 5.41E-01 |
| EPS8L2 | 3  | 0.21  | 0.16 | 2.06E-01 |
| ERBB2  | 8  | -0.04 | 0.22 | 8.59E-01 |
| ERBB3  | 8  | -0.06 | 0.12 | 6.42E-01 |
| ERBB4  | 14 | -0.12 | 0.16 | 4.41E-01 |
| ERBIN  | 3  | 0.51  | 0.54 | 3.40E-01 |
| EREG   | 8  | -0.12 | 0.24 | 6.16E-01 |
| ERP44  | 6  | 0.11  | 0.11 | 3.32E-01 |
| ESAM   | 7  | 0.26  | 0.16 | 1.11E-01 |
| ESM1   | 11 | 0.08  | 0.19 | 6.89E-01 |
| EZR    | 2  | 0.38  | 0.59 | 5.22E-01 |
| F11R   | 11 | 0.66  | 0.25 | 7.93E-03 |
| F2R    | 7  | -0.04 | 0.22 | 8.72E-01 |
| F3     | 9  | 0.21  | 0.12 | 7.59E-02 |
| F7     | 7  | 0.07  | 0.09 | 4.55E-01 |
| F9     | 2  | 0.34  | 0.40 | 4.04E-01 |
| FABP1  | 2  | 0.46  | 0.22 | 3.67E-02 |
| FABP2  | 5  | 0.09  | 0.21 | 6.47E-01 |
| FABP4  | 1  | 1.66  | 0.72 | 2.10E-02 |
| FABP5  | 2  | -0.20 | 0.42 | 6.25E-01 |
| FABP6  | 3  | 0.00  | 0.19 | 9.88E-01 |
| FABP9  | 17 | -0.09 | 0.10 | 3.45E-01 |
| FADD   | 3  | -0.28 | 0.46 | 5.46E-01 |
| FAM3B  | 6  | -0.18 | 0.08 | 2.92E-02 |
| FAM3C  | 1  | 0.07  | 0.82 | 9.35E-01 |
| FAP    | 5  | 0.01  | 0.18 | 9.47E-01 |

|           |    |       |      |          |
|-----------|----|-------|------|----------|
| FAS       | 3  | -0.17 | 0.19 | 3.53E-01 |
| FASLG     | 20 | -0.27 | 0.11 | 1.71E-02 |
| FBP1      | 5  | 0.06  | 0.15 | 6.72E-01 |
| FCAR      | 14 | 0.10  | 0.07 | 1.46E-01 |
| FCER2     | 11 | 0.10  | 0.13 | 4.78E-01 |
| FCGR2A    | 5  | 0.08  | 0.05 | 1.10E-01 |
| FCGR2B    | 4  | 0.02  | 0.10 | 8.65E-01 |
| FCGR3B    | 12 | -0.08 | 0.15 | 5.95E-01 |
| FCN2      | 10 | -0.05 | 0.07 | 4.78E-01 |
| FCRL1     | 24 | -0.05 | 0.10 | 5.95E-01 |
| FCRL2     | 13 | 0.07  | 0.08 | 3.36E-01 |
| FCRL3     | 5  | -0.02 | 0.05 | 7.45E-01 |
| FCRL5     | 9  | 0.06  | 0.19 | 7.48E-01 |
| FCRL6     | 5  | 0.02  | 0.07 | 7.60E-01 |
| FCRLB     | 7  | -0.04 | 0.07 | 5.90E-01 |
| FEN1      | 1  | -0.62 | 0.93 | 5.05E-01 |
| FES       | 1  | 0.12  | 0.37 | 7.47E-01 |
| FETUB     | 4  | -0.11 | 0.12 | 3.61E-01 |
| FGF19     | 5  | 0.08  | 0.17 | 6.63E-01 |
| FGF2      | 6  | -0.10 | 0.07 | 1.50E-01 |
| FGF21     | 7  | 0.09  | 0.20 | 6.47E-01 |
| FGF23     | 5  | 0.32  | 0.27 | 2.42E-01 |
| FGF5      | 2  | -0.16 | 0.08 | 4.05E-02 |
| FGFBP1    | 11 | -0.33 | 0.23 | 1.50E-01 |
| FGFR2     | 7  | 0.03  | 0.27 | 9.22E-01 |
| FGR       | 1  | -0.23 | 0.53 | 6.73E-01 |
| FHIT      | 2  | -0.48 | 0.46 | 3.01E-01 |
| FIS1      | 4  | 0.41  | 0.27 | 1.26E-01 |
| FKBP1B    | 4  | 0.18  | 0.20 | 3.79E-01 |
| FKBP4     | 5  | -0.17 | 0.35 | 6.37E-01 |
| FKBP5     | 5  | -0.13 | 0.22 | 5.55E-01 |
| FLI1      | 3  | 0.07  | 0.47 | 8.79E-01 |
| FLRT2     | 11 | 0.09  | 0.08 | 2.63E-01 |
| FLT1      | 9  | 0.09  | 0.12 | 4.63E-01 |
| FLT3      | 5  | -0.84 | 0.30 | 5.10E-03 |
| FLT3LG    | 19 | 0.10  | 0.12 | 3.93E-01 |
| FLT4      | 11 | 0.08  | 0.06 | 1.85E-01 |
| FOLR1     | 7  | -0.44 | 0.24 | 6.31E-02 |
| FOLR2     | 14 | -0.28 | 0.14 | 5.37E-02 |
| FOLR3     | 9  | -0.19 | 0.25 | 4.44E-01 |
| FOXO1     | 3  | -0.29 | 0.31 | 3.50E-01 |
| FOXO3     | 1  | 3.75  | 0.89 | 2.46E-05 |
| FRZB      | 2  | 0.04  | 0.11 | 7.35E-01 |
| FST       | 3  | 0.59  | 0.27 | 2.68E-02 |
| FSTL3     | 2  | -0.21 | 0.47 | 6.61E-01 |
| FUCA1     | 5  | 0.05  | 0.04 | 2.15E-01 |
| FURIN     | 3  | -0.14 | 0.23 | 5.28E-01 |
| FUS       | 2  | -0.29 | 0.49 | 5.49E-01 |
| FUT3_FUT5 | 12 | 0.10  | 0.09 | 2.61E-01 |
| FUT8      | 11 | -0.04 | 0.06 | 4.97E-01 |
| FXN       | 3  | -0.28 | 0.51 | 5.93E-01 |
| FXND5     | 2  | -0.13 | 0.52 | 8.00E-01 |
| FYB1      | 2  | 0.22  | 0.55 | 6.92E-01 |
| GAL       | 19 | 0.01  | 0.12 | 9.53E-01 |

|         |    |       |      |          |
|---------|----|-------|------|----------|
| GALNT10 | 9  | -0.09 | 0.12 | 4.61E-01 |
| GALNT2  | 6  | 0.27  | 0.14 | 5.86E-02 |
| GALNT3  | 8  | -0.07 | 0.11 | 5.49E-01 |
| GALNT7  | 6  | 0.04  | 0.15 | 7.63E-01 |
| GAS6    | 15 | -0.05 | 0.11 | 6.59E-01 |
| GBP2    | 1  | -0.65 | 0.48 | 1.75E-01 |
| GCG     | 5  | 0.11  | 0.39 | 7.85E-01 |
| GCNT1   | 5  | -0.03 | 0.11 | 7.81E-01 |
| GDF15   | 1  | -0.03 | 0.18 | 8.71E-01 |
| GDF2    | 13 | -0.05 | 0.16 | 7.42E-01 |
| GDNF    | 1  | -0.05 | 0.21 | 8.07E-01 |
| GFAP    | 6  | 0.16  | 0.28 | 5.57E-01 |
| GFRA1   | 4  | 0.01  | 0.18 | 9.74E-01 |
| GFRA2   | 6  | 0.02  | 0.14 | 8.97E-01 |
| GFRA3   | 20 | 0.24  | 0.14 | 8.26E-02 |
| GGH     | 9  | 0.04  | 0.11 | 7.10E-01 |
| GGT1    | 7  | 0.02  | 0.16 | 8.82E-01 |
| GGT5    | 4  | 0.10  | 0.16 | 5.39E-01 |
| GHRL    | 8  | 0.09  | 0.18 | 6.23E-01 |
| GKN1    | 4  | 0.45  | 0.37 | 2.18E-01 |
| GLB1    | 8  | -0.29 | 0.13 | 2.46E-02 |
| GLO1    | 1  | -0.36 | 0.15 | 1.61E-02 |
| GLOD4   | 2  | 0.00  | 0.65 | 9.97E-01 |
| GLRX    | 2  | 0.00  | 0.10 | 9.66E-01 |
| GLT8D2  | 1  | 0.12  | 0.27 | 6.63E-01 |
| GMPR    | 2  | 0.70  | 0.19 | 3.19E-04 |
| GNE     | 3  | 0.02  | 0.33 | 9.44E-01 |
| GNLY    | 9  | -0.01 | 0.08 | 9.42E-01 |
| GOLM2   | 9  | -0.27 | 0.13 | 3.40E-02 |
| GOPC    | 2  | -0.01 | 0.53 | 9.91E-01 |
| GP1BA   | 15 | -0.03 | 0.17 | 8.50E-01 |
| GP2     | 8  | -0.22 | 0.08 | 5.23E-03 |
| GP6     | 6  | 0.10  | 0.15 | 4.98E-01 |
| GPA33   | 12 | 0.16  | 0.12 | 1.77E-01 |
| GPC1    | 15 | -0.23 | 0.12 | 6.05E-02 |
| GPC5    | 10 | -0.01 | 0.06 | 8.83E-01 |
| GPNMB   | 6  | 0.55  | 0.13 | 3.60E-05 |
| GPR37   | 10 | 0.00  | 0.07 | 9.54E-01 |
| GRAP2   | 3  | -0.44 | 0.47 | 3.48E-01 |
| GRK5    | 1  | 0.25  | 0.18 | 1.75E-01 |
| GRN     | 10 | -0.25 | 0.07 | 5.32E-04 |
| GRPEL1  | 3  | -0.49 | 0.42 | 2.37E-01 |
| GSAP    | 1  | 0.48  | 0.80 | 5.53E-01 |
| GSTA1   | 9  | -0.19 | 0.14 | 1.62E-01 |
| GSTA3   | 5  | -0.21 | 0.15 | 1.62E-01 |
| GSTP1   | 1  | -0.01 | 0.24 | 9.55E-01 |
| GUCA2A  | 7  | 0.21  | 0.19 | 2.56E-01 |
| GUSB    | 11 | -0.03 | 0.14 | 8.09E-01 |
| GYS1    | 3  | 0.09  | 0.19 | 6.20E-01 |
| GZMA    | 13 | 0.00  | 0.14 | 9.84E-01 |
| GZMB    | 8  | -0.32 | 0.24 | 1.81E-01 |
| GZMH    | 7  | 0.01  | 0.19 | 9.74E-01 |
| HAGH    | 1  | -0.49 | 0.41 | 2.35E-01 |
| HAO1    | 8  | -0.59 | 0.28 | 3.26E-02 |

|          |    |       |      |          |
|----------|----|-------|------|----------|
| HARS1    | 2  | 0.07  | 0.55 | 8.99E-01 |
| HAVCR1   | 7  | -0.21 | 0.10 | 2.98E-02 |
| HAVCR2   | 8  | -0.35 | 0.16 | 3.02E-02 |
| HBEGF    | 21 | 0.28  | 0.14 | 4.09E-02 |
| HBQ1     | 2  | -0.15 | 0.13 | 2.45E-01 |
| HCLS1    | 4  | 0.04  | 0.35 | 9.17E-01 |
| HDGF     | 2  | 0.00  | 0.04 | 9.64E-01 |
| HEBP1    | 1  | -0.04 | 0.40 | 9.18E-01 |
| HEXIM1   | 4  | 0.01  | 0.30 | 9.71E-01 |
| HGF      | 5  | -0.04 | 0.25 | 8.88E-01 |
| HGS      | 4  | 0.11  | 0.43 | 7.98E-01 |
| HLA-DRA  | 3  | -0.42 | 0.09 | 2.85E-06 |
| HLA-E    | 4  | -0.20 | 0.13 | 1.13E-01 |
| HMBS     | 1  | -0.15 | 0.38 | 6.98E-01 |
| HMOX1    | 16 | 0.08  | 0.15 | 5.72E-01 |
| HMOX2    | 4  | -1.03 | 0.30 | 5.58E-04 |
| HNMT     | 4  | -0.08 | 0.07 | 2.40E-01 |
| HNRNPK   | 1  | 0.07  | 0.83 | 9.34E-01 |
| HPGDS    | 1  | -0.74 | 0.76 | 3.32E-01 |
| HS3ST3B1 | 9  | 0.13  | 0.13 | 3.08E-01 |
| HS6ST1   | 14 | -0.23 | 0.14 | 1.05E-01 |
| HSD11B1  | 9  | 0.11  | 0.15 | 4.51E-01 |
| HSPA1A   | 3  | -0.14 | 0.37 | 7.01E-01 |
| HSPB1    | 5  | -0.58 | 0.31 | 6.33E-02 |
| HSPB6    | 5  | 0.11  | 0.43 | 7.91E-01 |
| HSPG2    | 4  | -0.07 | 0.27 | 7.91E-01 |
| HTRA2    | 1  | 0.08  | 0.94 | 9.34E-01 |
| HYAL1    | 4  | -0.31 | 0.16 | 5.56E-02 |
| HYOU1    | 13 | -0.42 | 0.16 | 8.93E-03 |
| ICA1     | 2  | -0.15 | 0.23 | 5.08E-01 |
| ICAM1    | 6  | 0.14  | 0.11 | 2.25E-01 |
| ICAM2    | 9  | 0.11  | 0.05 | 2.90E-02 |
| ICAM3    | 21 | 0.10  | 0.09 | 2.99E-01 |
| ICAM4    | 14 | -0.08 | 0.07 | 2.48E-01 |
| ICAM5    | 6  | 0.16  | 0.06 | 8.78E-03 |
| ICOSLG   | 4  | 0.09  | 0.13 | 4.86E-01 |
| IDI2     | 1  | 0.00  | 0.15 | 9.86E-01 |
| IDS      | 3  | 0.07  | 0.22 | 7.70E-01 |
| IDUA     | 13 | 0.00  | 0.08 | 9.74E-01 |
| IFNG     | 2  | 0.16  | 0.64 | 8.01E-01 |
| IFNGR1   | 10 | -0.01 | 0.15 | 9.39E-01 |
| IFNGR2   | 8  | -0.08 | 0.05 | 1.12E-01 |
| IFNL1    | 4  | -0.04 | 0.33 | 9.02E-01 |
| IFNLR1   | 2  | -0.79 | 0.49 | 1.12E-01 |
| IGF1R    | 9  | 0.27  | 0.11 | 1.31E-02 |
| IGF2R    | 14 | -0.10 | 0.11 | 3.86E-01 |
| IGFBP1   | 2  | -0.53 | 0.50 | 2.88E-01 |
| IGFBP2   | 3  | -1.28 | 0.47 | 6.82E-03 |
| IGFBP3   | 5  | 0.04  | 0.10 | 7.15E-01 |
| IGFBP4   | 3  | 0.27  | 0.53 | 6.08E-01 |
| IGFBP6   | 3  | 0.13  | 0.51 | 7.91E-01 |
| IGFBP7   | 3  | -0.09 | 0.15 | 5.62E-01 |
| IGFBPL1  | 2  | 0.14  | 0.12 | 2.69E-01 |
| IGSF3    | 5  | -0.58 | 0.25 | 1.86E-02 |

|             |    |       |      |          |
|-------------|----|-------|------|----------|
| IGSF8       | 5  | 0.19  | 0.25 | 4.60E-01 |
| IKBKG       | 1  | -0.07 | 0.99 | 9.44E-01 |
| IKZF2       | 1  | 0.14  | 0.48 | 7.64E-01 |
| IL10        | 5  | -0.10 | 0.20 | 6.27E-01 |
| IL10RA      | 1  | 0.47  | 0.35 | 1.76E-01 |
| IL10RB      | 6  | -0.05 | 0.09 | 5.57E-01 |
| IL11        | 1  | -0.65 | 0.90 | 4.68E-01 |
| IL12A_IL12B | 16 | -0.08 | 0.08 | 3.08E-01 |
| IL12B       | 17 | -0.07 | 0.08 | 3.27E-01 |
| IL12RB1     | 4  | 0.01  | 0.10 | 9.49E-01 |
| IL13        | 1  | 0.66  | 0.54 | 2.27E-01 |
| IL13RA1     | 2  | 0.13  | 0.53 | 8.12E-01 |
| IL15        | 22 | -0.06 | 0.14 | 6.78E-01 |
| IL15RA      | 1  | -0.03 | 0.21 | 8.66E-01 |
| IL16        | 1  | -0.52 | 0.76 | 4.97E-01 |
| IL17C       | 2  | -0.07 | 0.37 | 8.48E-01 |
| IL17D       | 2  | 0.06  | 0.14 | 6.51E-01 |
| IL17F       | 1  | -0.01 | 0.78 | 9.88E-01 |
| IL17RA      | 3  | -0.03 | 0.06 | 6.12E-01 |
| IL17RB      | 10 | -0.05 | 0.06 | 4.07E-01 |
| IL18        | 8  | 0.18  | 0.12 | 1.54E-01 |
| IL18BP      | 9  | -0.40 | 0.20 | 4.87E-02 |
| IL18R1      | 12 | -0.02 | 0.06 | 7.20E-01 |
| IL18RAP     | 3  | -0.16 | 0.32 | 6.18E-01 |
| IL19        | 3  | 0.06  | 0.10 | 5.74E-01 |
| IL1A        | 1  | -1.48 | 0.44 | 7.21E-04 |
| IL1B        | 2  | -0.10 | 0.19 | 5.94E-01 |
| IL1R1       | 13 | 0.00  | 0.11 | 9.89E-01 |
| IL1R2       | 13 | -0.14 | 0.09 | 1.02E-01 |
| IL1RAP      | 4  | -0.08 | 0.05 | 1.08E-01 |
| IL1RL1      | 12 | -0.06 | 0.07 | 3.72E-01 |
| IL1RL2      | 12 | -0.04 | 0.10 | 6.80E-01 |
| IL1RN       | 2  | -0.37 | 0.23 | 9.99E-02 |
| IL20RA      | 1  | 0.35  | 0.68 | 6.10E-01 |
| IL22RA1     | 2  | 0.04  | 0.17 | 7.98E-01 |
| IL2RA       | 8  | -0.10 | 0.09 | 2.53E-01 |
| IL32        | 7  | 0.22  | 0.17 | 1.88E-01 |
| IL33        | 1  | -1.75 | 0.90 | 5.14E-02 |
| IL34        | 1  | 0.03  | 0.07 | 6.59E-01 |
| IL3RA       | 4  | -0.49 | 0.32 | 1.32E-01 |
| IL4R        | 5  | 0.24  | 0.14 | 7.30E-02 |
| IL5RA       | 23 | 0.02  | 0.10 | 8.52E-01 |
| IL6         | 4  | 0.35  | 0.19 | 7.17E-02 |
| IL6R        | 5  | 0.10  | 0.04 | 2.55E-02 |
| IL6ST       | 11 | 0.24  | 0.13 | 6.13E-02 |
| IL7         | 3  | 0.20  | 0.39 | 6.02E-01 |
| IL7R        | 12 | 0.10  | 0.05 | 5.60E-02 |
| ILKAP       | 1  | 0.07  | 0.85 | 9.34E-01 |
| IMPA1       | 2  | 0.47  | 0.24 | 4.97E-02 |
| ING1        | 1  | 0.08  | 0.93 | 9.34E-01 |
| INHBC       | 6  | 0.11  | 0.08 | 1.93E-01 |
| INPP1       | 3  | -0.25 | 0.36 | 4.83E-01 |
| IPCEF1      | 2  | -0.79 | 0.47 | 9.54E-02 |
| IQGAP2      | 1  | 0.52  | 0.34 | 1.25E-01 |

|          |    |       |      |          |
|----------|----|-------|------|----------|
| IRAG2    | 2  | 0.02  | 0.58 | 9.73E-01 |
| IRAK1    | 1  | -0.06 | 0.86 | 9.44E-01 |
| IRAK4    | 1  | -0.53 | 0.67 | 4.27E-01 |
| ISLR2    | 7  | 0.19  | 0.09 | 2.53E-02 |
| ISM1     | 2  | -0.63 | 0.27 | 1.98E-02 |
| ITGA11   | 5  | -0.31 | 0.18 | 8.17E-02 |
| ITGA5    | 10 | 0.00  | 0.18 | 9.92E-01 |
| ITGA6    | 5  | -0.05 | 0.17 | 7.61E-01 |
| ITGAM    | 9  | 0.15  | 0.17 | 3.82E-01 |
| ITGAV    | 6  | -0.08 | 0.22 | 7.29E-01 |
| ITGB1    | 6  | 0.38  | 0.22 | 8.31E-02 |
| ITGB1BP2 | 4  | -0.55 | 0.35 | 1.20E-01 |
| ITGB2    | 9  | 0.01  | 0.16 | 9.41E-01 |
| ITGB5    | 5  | -0.10 | 0.31 | 7.49E-01 |
| ITGB6    | 9  | 0.26  | 0.15 | 9.28E-02 |
| ITGB7    | 18 | 0.06  | 0.08 | 4.55E-01 |
| ITIH3    | 7  | 0.12  | 0.13 | 3.65E-01 |
| ITM2A    | 1  | 0.12  | 0.23 | 5.97E-01 |
| JAM2     | 5  | 0.02  | 0.24 | 9.18E-01 |
| JCHAIN   | 12 | -0.06 | 0.22 | 7.80E-01 |
| KAZALD1  | 5  | -0.02 | 0.07 | 8.16E-01 |
| KDR      | 11 | -0.02 | 0.09 | 7.94E-01 |
| KEL      | 16 | 0.09  | 0.08 | 2.74E-01 |
| KIFBP    | 3  | 0.02  | 0.33 | 9.54E-01 |
| KIR2DL3  | 3  | -0.25 | 0.14 | 7.11E-02 |
| KIR3DL1  | 2  | 0.04  | 0.05 | 4.18E-01 |
| KIRREL2  | 7  | 0.00  | 0.12 | 1.00E+00 |
| KIT      | 22 | 0.68  | 0.12 | 4.99E-08 |
| KITLG    | 15 | -0.03 | 0.13 | 7.98E-01 |
| KLB      | 7  | 0.00  | 0.07 | 9.42E-01 |
| KLK1     | 13 | -0.02 | 0.05 | 7.57E-01 |
| KLK10    | 3  | -0.09 | 0.08 | 3.07E-01 |
| KLK11    | 4  | 0.09  | 0.11 | 4.21E-01 |
| KLK12    | 5  | 0.03  | 0.04 | 4.40E-01 |
| KLK13    | 10 | -0.03 | 0.10 | 7.62E-01 |
| KLK14    | 9  | -0.01 | 0.12 | 9.16E-01 |
| KLK4     | 3  | -0.16 | 0.12 | 1.84E-01 |
| KLK6     | 2  | -0.23 | 0.26 | 3.69E-01 |
| KLK8     | 4  | -0.11 | 0.11 | 3.27E-01 |
| KLRB1    | 10 | -0.25 | 0.19 | 1.77E-01 |
| KLRD1    | 11 | 0.10  | 0.09 | 2.74E-01 |
| KRT18    | 8  | -0.50 | 0.26 | 5.55E-02 |
| KRT19    | 3  | -0.01 | 0.30 | 9.63E-01 |
| KRT5     | 4  | 0.04  | 0.24 | 8.81E-01 |
| KYAT1    | 4  | 0.05  | 0.35 | 8.87E-01 |
| KYNU     | 3  | -0.19 | 0.19 | 3.07E-01 |
| L1CAM    | 6  | -0.26 | 0.20 | 1.82E-01 |
| LACTB2   | 3  | 0.37  | 0.25 | 1.37E-01 |
| LAG3     | 10 | -0.34 | 0.16 | 2.66E-02 |
| LAIR1    | 3  | -0.84 | 0.58 | 1.51E-01 |
| LAIR2    | 3  | -0.20 | 0.07 | 3.22E-03 |
| LAMA4    | 11 | 0.00  | 0.15 | 9.75E-01 |
| LAMP2    | 2  | -0.47 | 0.62 | 4.53E-01 |
| LAMP3    | 9  | -0.03 | 0.18 | 8.44E-01 |



|               |    |       |      |          |
|---------------|----|-------|------|----------|
| LAT           | 6  | 0.40  | 0.31 | 1.91E-01 |
| LAT2          | 1  | -0.05 | 0.79 | 9.44E-01 |
| LAYN          | 3  | 0.14  | 0.13 | 2.61E-01 |
| LBP           | 2  | -0.02 | 0.07 | 8.33E-01 |
| LBR           | 6  | 0.15  | 0.22 | 4.80E-01 |
| LCN2          | 16 | 0.00  | 0.17 | 9.78E-01 |
| LDLR          | 15 | -0.30 | 0.17 | 7.72E-02 |
| LEFTY2        | 3  | 1.98  | 0.48 | 4.02E-05 |
| LEP           | 1  | -2.17 | 1.12 | 5.37E-02 |
| LEPR          | 9  | -0.09 | 0.16 | 5.87E-01 |
| LGALS1        | 2  | -0.17 | 0.18 | 3.48E-01 |
| LGALS3        | 4  | -0.71 | 0.35 | 4.37E-02 |
| LGALS4        | 3  | 0.30  | 0.10 | 2.47E-03 |
| GALS7_LGALS7I | 7  | -0.36 | 0.12 | 3.39E-03 |
| LGALS8        | 6  | 0.18  | 0.10 | 7.55E-02 |
| LGALS9        | 3  | -0.82 | 0.36 | 2.11E-02 |
| LGMN          | 19 | -0.03 | 0.14 | 8.22E-01 |
| LHB           | 1  | -0.24 | 0.56 | 6.73E-01 |
| LIFR          | 11 | 0.20  | 0.12 | 7.66E-02 |
| LILRA2        | 11 | -0.03 | 0.08 | 6.72E-01 |
| LILRA5        | 9  | 0.10  | 0.20 | 6.14E-01 |
| LILRB1        | 7  | 0.06  | 0.08 | 4.78E-01 |
| LILRB2        | 10 | 0.03  | 0.05 | 5.07E-01 |
| LILRB4        | 2  | -0.42 | 0.57 | 4.65E-01 |
| LILRB5        | 2  | 0.00  | 0.04 | 9.45E-01 |
| LPCAT2        | 1  | 0.03  | 0.45 | 9.43E-01 |
| LPL           | 7  | 0.28  | 0.12 | 1.98E-02 |
| LPO           | 13 | -0.06 | 0.10 | 5.80E-01 |
| LRIG1         | 11 | -0.07 | 0.06 | 2.33E-01 |
| LRP1          | 11 | -0.02 | 0.08 | 8.33E-01 |
| LRP11         | 6  | 0.04  | 0.08 | 6.08E-01 |
| LRPAP1        | 7  | 0.07  | 0.07 | 2.73E-01 |
| LRRC25        | 13 | -0.08 | 0.10 | 4.23E-01 |
| LRRN1         | 6  | -0.02 | 0.06 | 7.92E-01 |
| LSP1          | 2  | -0.80 | 0.32 | 1.16E-02 |
| LTA           | 9  | 0.11  | 0.06 | 9.27E-02 |
| LTA4H         | 1  | -0.47 | 0.51 | 3.51E-01 |
| LTBP2         | 8  | 0.09  | 0.25 | 7.13E-01 |
| LTBP3         | 5  | -0.06 | 0.10 | 5.66E-01 |
| LTBR          | 13 | -0.06 | 0.11 | 6.06E-01 |
| LXN           | 1  | 0.60  | 0.29 | 4.12E-02 |
| LY6D          | 5  | -0.21 | 0.11 | 4.93E-02 |
| LY75          | 6  | 0.07  | 0.05 | 1.48E-01 |
| LY9           | 13 | -0.14 | 0.09 | 1.08E-01 |
| LY96          | 11 | -0.29 | 0.21 | 1.53E-01 |
| LYAR          | 1  | -0.77 | 0.94 | 4.13E-01 |
| LYN           | 5  | 0.23  | 0.38 | 5.48E-01 |
| LYPD3         | 17 | -0.04 | 0.09 | 6.65E-01 |
| LYPD8         | 7  | -0.09 | 0.09 | 3.38E-01 |
| MAD1L1        | 1  | 0.06  | 0.38 | 8.80E-01 |
| MAGED1        | 2  | 0.18  | 0.50 | 7.20E-01 |
| MANF          | 6  | 0.14  | 0.34 | 6.77E-01 |
| MANSC1        | 12 | -0.18 | 0.20 | 3.46E-01 |
| MAP2K6        | 2  | 0.10  | 0.57 | 8.60E-01 |

|           |    |       |      |          |
|-----------|----|-------|------|----------|
| MAP3K5    | 1  | -0.06 | 0.88 | 9.44E-01 |
| MAP4K5    | 3  | -0.27 | 0.26 | 3.04E-01 |
| MAPK9     | 1  | -0.39 | 0.43 | 3.63E-01 |
| MARCO     | 9  | -0.25 | 0.13 | 5.39E-02 |
| MASP1     | 12 | 0.28  | 0.11 | 8.17E-03 |
| MATN2     | 5  | -0.13 | 0.11 | 2.28E-01 |
| MATN3     | 4  | -0.05 | 0.09 | 5.95E-01 |
| MAVS      | 3  | -0.30 | 0.42 | 4.73E-01 |
| MAX       | 5  | 0.76  | 0.36 | 3.56E-02 |
| MB        | 8  | 0.12  | 0.32 | 7.02E-01 |
| MCAM      | 8  | 0.03  | 0.17 | 8.62E-01 |
| MCFD2     | 4  | 0.33  | 0.26 | 2.06E-01 |
| MDGA1     | 6  | 0.08  | 0.04 | 9.34E-02 |
| MDK       | 13 | 0.15  | 0.19 | 4.38E-01 |
| MED18     | 1  | 0.23  | 0.85 | 7.88E-01 |
| MEGF10    | 11 | 0.35  | 0.16 | 2.38E-02 |
| MEGF9     | 11 | -0.13 | 0.12 | 2.98E-01 |
| MEP1B     | 14 | -0.01 | 0.05 | 8.49E-01 |
| MEPE      | 12 | -0.09 | 0.18 | 6.30E-01 |
| MERTK     | 12 | 0.16  | 0.14 | 2.50E-01 |
| MESD      | 4  | 0.18  | 0.39 | 6.43E-01 |
| MET       | 18 | 0.27  | 0.12 | 2.32E-02 |
| METAP1D   | 3  | 0.48  | 0.47 | 3.00E-01 |
| METAP2    | 4  | -0.24 | 0.32 | 4.43E-01 |
| MFAP5     | 5  | 0.14  | 0.21 | 4.84E-01 |
| MFGE8     | 11 | 0.06  | 0.11 | 5.85E-01 |
| MGLL      | 3  | 0.31  | 0.43 | 4.76E-01 |
| MGMT      | 3  | -0.07 | 0.12 | 5.47E-01 |
| MIA       | 6  | 0.05  | 0.07 | 4.99E-01 |
| MICB_MICA | 8  | 0.01  | 0.05 | 8.49E-01 |
| MIF       | 3  | 0.08  | 0.36 | 8.17E-01 |
| MILR1     | 9  | -0.07 | 0.11 | 5.40E-01 |
| MITD1     | 2  | -0.16 | 0.54 | 7.70E-01 |
| MLN       | 15 | -0.33 | 0.15 | 3.11E-02 |
| MME       | 13 | -0.12 | 0.09 | 1.53E-01 |
| MMP1      | 10 | -0.04 | 0.10 | 6.67E-01 |
| MMP10     | 2  | 0.11  | 0.15 | 4.74E-01 |
| MMP12     | 2  | -0.06 | 0.10 | 5.09E-01 |
| MMP13     | 1  | 0.20  | 0.35 | 5.65E-01 |
| MMP3      | 4  | 0.01  | 0.10 | 8.81E-01 |
| MMP7      | 5  | -0.07 | 0.16 | 6.38E-01 |
| MMP8      | 2  | -0.10 | 0.12 | 4.21E-01 |
| MMP9      | 9  | 0.11  | 0.17 | 5.20E-01 |
| MNDA      | 1  | -1.66 | 0.99 | 9.52E-02 |
| MOG       | 2  | -0.09 | 0.24 | 7.04E-01 |
| MPHOSPH8  | 2  | -0.13 | 0.54 | 8.15E-01 |
| MPI       | 4  | -0.42 | 0.21 | 5.02E-02 |
| MPIG6B    | 4  | 0.14  | 0.33 | 6.76E-01 |
| MPO       | 7  | -0.23 | 0.18 | 1.95E-01 |
| MSLN      | 7  | -0.02 | 0.08 | 7.81E-01 |
| MSMB      | 5  | 0.16  | 0.05 | 2.36E-03 |
| MSR1      | 11 | -0.27 | 0.11 | 1.95E-02 |
| MSRA      | 2  | 0.18  | 0.59 | 7.67E-01 |
| MSTN      | 6  | 0.93  | 0.34 | 6.72E-03 |

|          |    |       |      |          |
|----------|----|-------|------|----------|
| MUC13    | 4  | 0.38  | 0.16 | 1.85E-02 |
| MUC16    | 2  | -0.06 | 0.24 | 7.92E-01 |
| MVK      | 1  | -0.34 | 0.57 | 5.57E-01 |
| MYOC     | 10 | -0.08 | 0.15 | 5.85E-01 |
| MZB1     | 7  | -0.34 | 0.24 | 1.59E-01 |
| MZT1     | 2  | -0.18 | 0.64 | 7.80E-01 |
| NAAA     | 15 | -0.08 | 0.07 | 2.71E-01 |
| NADK     | 5  | 0.17  | 0.16 | 2.80E-01 |
| NBL1     | 3  | -0.12 | 0.37 | 7.42E-01 |
| NBN      | 3  | 0.28  | 0.42 | 5.11E-01 |
| NCAM1    | 7  | 0.17  | 0.15 | 2.63E-01 |
| NCAM2    | 5  | -0.30 | 0.21 | 1.52E-01 |
| NCAN     | 11 | 0.09  | 0.20 | 6.39E-01 |
| NCF2     | 4  | -0.11 | 0.21 | 5.78E-01 |
| NCK2     | 1  | 0.28  | 0.99 | 7.77E-01 |
| NCR1     | 22 | -0.26 | 0.11 | 2.60E-02 |
| NCS1     | 7  | -0.22 | 0.28 | 4.27E-01 |
| NECTIN2  | 4  | 0.20  | 0.20 | 3.06E-01 |
| NECTIN4  | 6  | -0.25 | 0.15 | 1.01E-01 |
| NEFL     | 2  | -1.67 | 0.78 | 3.26E-02 |
| NELL1    | 16 | -0.04 | 0.10 | 7.16E-01 |
| NELL2    | 13 | 0.26  | 0.20 | 1.79E-01 |
| NFASC    | 4  | -0.09 | 0.12 | 4.49E-01 |
| NFATC1   | 2  | 0.10  | 0.41 | 7.99E-01 |
| NFATC3   | 1  | 0.28  | 0.85 | 7.42E-01 |
| NFKBIE   | 2  | -0.16 | 0.22 | 4.57E-01 |
| NID1     | 10 | -0.12 | 0.17 | 4.71E-01 |
| NID2     | 13 | 0.17  | 0.08 | 3.61E-02 |
| NINJ1    | 1  | 1.29  | 0.71 | 6.97E-02 |
| NME3     | 12 | 0.10  | 0.12 | 4.10E-01 |
| NMNAT1   | 4  | 0.08  | 0.17 | 6.60E-01 |
| NOMO1    | 3  | 0.72  | 0.34 | 3.24E-02 |
| NOS1     | 1  | 0.54  | 0.79 | 4.96E-01 |
| NOS3     | 2  | 0.13  | 0.58 | 8.26E-01 |
| NOTCH1   | 7  | -0.25 | 0.16 | 1.15E-01 |
| NOTCH3   | 11 | -0.12 | 0.21 | 5.72E-01 |
| NPDC1    | 5  | -0.27 | 0.39 | 4.86E-01 |
| NPPB     | 2  | 0.20  | 0.26 | 4.39E-01 |
| NPPC     | 2  | 0.58  | 0.74 | 4.32E-01 |
| NPTX1    | 12 | 0.05  | 0.09 | 5.29E-01 |
| NPTXR    | 4  | 0.07  | 0.09 | 4.14E-01 |
| NPY      | 11 | -0.17 | 0.18 | 3.51E-01 |
| NRCAM    | 7  | -0.66 | 0.24 | 6.28E-03 |
| NRP1     | 6  | 0.05  | 0.15 | 7.35E-01 |
| NRP2     | 9  | 0.38  | 0.21 | 7.28E-02 |
| NRTN     | 1  | -0.05 | 0.90 | 9.59E-01 |
| NSFL1C   | 2  | 0.53  | 0.48 | 2.72E-01 |
| NT5C3A   | 4  | 0.17  | 0.35 | 6.32E-01 |
| NT5E     | 8  | -0.10 | 0.08 | 2.27E-01 |
| NTF3     | 4  | -0.26 | 0.23 | 2.59E-01 |
| NTF4     | 1  | -0.71 | 0.95 | 4.57E-01 |
| NTproBNP | 4  | 0.17  | 0.18 | 3.36E-01 |
| NTRK2    | 7  | -0.86 | 0.28 | 2.29E-03 |
| NTRK3    | 9  | 0.06  | 0.18 | 7.37E-01 |

|          |    |       |      |          |
|----------|----|-------|------|----------|
| NUB1     | 4  | -0.02 | 0.24 | 9.35E-01 |
| NUCB2    | 5  | 0.12  | 0.12 | 3.22E-01 |
| NUDC     | 2  | -0.01 | 0.49 | 9.85E-01 |
| NUDT2    | 2  | -0.02 | 0.20 | 9.17E-01 |
| NUDT5    | 2  | -1.10 | 0.56 | 4.99E-02 |
| OBP2B    | 11 | -0.08 | 0.08 | 3.58E-01 |
| ODAM     | 2  | -0.22 | 0.19 | 2.39E-01 |
| OGFR     | 2  | -0.30 | 0.36 | 4.06E-01 |
| OGN      | 4  | 0.02  | 0.08 | 8.19E-01 |
| OLR1     | 6  | -0.04 | 0.26 | 8.79E-01 |
| OMD      | 6  | 0.08  | 0.24 | 7.46E-01 |
| OMG      | 8  | -0.06 | 0.23 | 7.90E-01 |
| OPTC     | 7  | -0.15 | 0.17 | 3.70E-01 |
| OSCAR    | 8  | -0.09 | 0.09 | 3.16E-01 |
| OSM      | 8  | -0.13 | 0.18 | 4.95E-01 |
| OSMR     | 5  | 0.11  | 0.09 | 2.13E-01 |
| OXT      | 9  | 0.04  | 0.09 | 6.57E-01 |
| P4HB     | 4  | 0.28  | 0.41 | 4.88E-01 |
| PADI2    | 1  | -0.31 | 0.40 | 4.37E-01 |
| PADI4    | 1  | -0.11 | 0.19 | 5.76E-01 |
| PAEP     | 3  | 0.13  | 0.07 | 6.17E-02 |
| PAG1     | 6  | -0.31 | 0.29 | 2.79E-01 |
| PAK4     | 1  | -0.07 | 0.95 | 9.44E-01 |
| PAM      | 4  | -0.03 | 0.10 | 7.26E-01 |
| PAMR1    | 4  | 0.15  | 0.13 | 2.39E-01 |
| PAPPA    | 11 | -0.23 | 0.16 | 1.68E-01 |
| PARK7    | 5  | 0.19  | 0.26 | 4.72E-01 |
| PARP1    | 2  | -0.44 | 0.29 | 1.28E-01 |
| PCDH1    | 5  | -0.33 | 0.28 | 2.49E-01 |
| PCDH17   | 8  | -0.01 | 0.10 | 8.87E-01 |
| PCOLCE   | 1  | -0.27 | 0.30 | 3.54E-01 |
| PCSK9    | 8  | -0.29 | 0.14 | 4.17E-02 |
| PDCD1    | 11 | 0.31  | 0.24 | 1.83E-01 |
| PDCD1LG2 | 8  | 0.05  | 0.06 | 3.95E-01 |
| PDCD5    | 2  | -0.20 | 0.14 | 1.43E-01 |
| PDCD6    | 4  | 0.11  | 0.05 | 2.34E-02 |
| PDGFA    | 16 | 0.15  | 0.14 | 2.96E-01 |
| PDGFB    | 15 | 0.09  | 0.14 | 5.10E-01 |
| PDGFC    | 4  | -0.01 | 0.16 | 9.73E-01 |
| PDGFRA   | 10 | 0.07  | 0.15 | 6.48E-01 |
| PDGFRB   | 2  | 0.01  | 0.04 | 8.91E-01 |
| PDLIM7   | 3  | -0.83 | 0.45 | 6.51E-02 |
| PEAR1    | 8  | -0.20 | 0.14 | 1.60E-01 |
| PEBP1    | 2  | -0.43 | 0.63 | 4.97E-01 |
| PECAM1   | 7  | 0.23  | 0.10 | 2.12E-02 |
| PFKFB2   | 4  | 0.00  | 0.23 | 9.94E-01 |
| PGF      | 3  | 0.44  | 0.46 | 3.38E-01 |
| PGLYRP1  | 12 | -0.04 | 0.14 | 7.77E-01 |
| PI3      | 4  | 0.02  | 0.17 | 9.10E-01 |
| PIGR     | 6  | 0.11  | 0.22 | 6.27E-01 |
| PIK3AP1  | 6  | -0.05 | 0.21 | 8.17E-01 |
| PIK3IP1  | 3  | 0.14  | 0.17 | 4.18E-01 |
| PILRA    | 6  | 0.01  | 0.05 | 8.50E-01 |
| PILRB    | 4  | 0.01  | 0.05 | 7.70E-01 |

|          |    |       |      |          |
|----------|----|-------|------|----------|
| PKLR     | 4  | -0.21 | 0.24 | 3.80E-01 |
| PLA2G10  | 13 | 0.32  | 0.11 | 2.75E-03 |
| PLA2G15  | 9  | -0.09 | 0.13 | 4.91E-01 |
| PLA2G1B  | 17 | 0.12  | 0.16 | 4.48E-01 |
| PLA2G2A  | 6  | 0.04  | 0.08 | 6.50E-01 |
| PLA2G4A  | 2  | -0.24 | 0.60 | 6.96E-01 |
| PLA2G7   | 8  | -1.20 | 0.27 | 6.21E-06 |
| PLAT     | 4  | -0.39 | 0.37 | 2.93E-01 |
| PLAU     | 9  | 0.11  | 0.14 | 4.29E-01 |
| PLAUR    | 10 | -0.42 | 0.18 | 1.69E-02 |
| PLIN1    | 1  | -0.51 | 0.60 | 3.93E-01 |
| PLIN3    | 2  | -0.48 | 0.56 | 3.93E-01 |
| PLPBP    | 2  | 0.00  | 0.56 | 1.00E+00 |
| PLTP     | 11 | -0.03 | 0.10 | 7.82E-01 |
| PLXDC1   | 4  | 0.04  | 0.19 | 8.54E-01 |
| PLXNA4   | 5  | 0.45  | 0.27 | 9.24E-02 |
| PLXNB2   | 11 | 0.03  | 0.07 | 6.47E-01 |
| PLXNB3   | 5  | 0.26  | 0.39 | 5.09E-01 |
| PM20D1   | 7  | 0.17  | 0.29 | 5.70E-01 |
| PMVK     | 6  | 0.05  | 0.29 | 8.57E-01 |
| PNLIPRP2 | 7  | -0.09 | 0.04 | 3.14E-02 |
| PNPT1    | 2  | -0.04 | 0.54 | 9.34E-01 |
| PODXL    | 6  | 0.18  | 0.09 | 4.39E-02 |
| PODXL2   | 11 | -0.40 | 0.20 | 4.42E-02 |
| POLR2F   | 1  | -1.36 | 0.95 | 1.52E-01 |
| PON2     | 3  | 0.02  | 0.06 | 7.58E-01 |
| PON3     | 9  | 0.12  | 0.13 | 3.67E-01 |
| PPCDC    | 2  | 0.01  | 0.15 | 9.19E-01 |
| PPIB     | 3  | 0.39  | 0.48 | 4.15E-01 |
| PPME1    | 1  | -0.21 | 0.94 | 8.28E-01 |
| PPP1R12A | 4  | -0.23 | 0.37 | 5.38E-01 |
| PPP1R2   | 3  | 0.20  | 0.46 | 6.58E-01 |
| PPP1R9B  | 2  | -0.01 | 0.59 | 9.82E-01 |
| PPP3R1   | 4  | 0.40  | 0.34 | 2.38E-01 |
| PPY      | 7  | 0.47  | 0.17 | 5.60E-03 |
| PRCP     | 12 | -0.28 | 0.14 | 4.12E-02 |
| PRDX1    | 2  | -0.22 | 0.54 | 6.80E-01 |
| PRDX3    | 1  | -0.83 | 0.78 | 2.88E-01 |
| PRDX5    | 2  | -0.32 | 0.33 | 3.31E-01 |
| PRDX6    | 1  | 0.23  | 0.36 | 5.31E-01 |
| PRELP    | 1  | 0.06  | 0.11 | 5.91E-01 |
| PRKAB1   | 1  | -0.07 | 0.93 | 9.44E-01 |
| PRKAR1A  | 5  | -0.20 | 0.22 | 3.67E-01 |
| PRKRA    | 1  | -0.03 | 0.49 | 9.44E-01 |
| PRL      | 3  | -0.15 | 0.46 | 7.46E-01 |
| PROC     | 7  | -0.28 | 0.18 | 1.22E-01 |
| PROK1    | 2  | -0.25 | 0.14 | 7.83E-02 |
| PRSS2    | 11 | 0.10  | 0.18 | 5.61E-01 |
| PRSS27   | 17 | -0.07 | 0.07 | 3.07E-01 |
| PRSS8    | 8  | -0.23 | 0.24 | 3.26E-01 |
| PRTFDC1  | 3  | 0.01  | 0.23 | 9.79E-01 |
| PRTG     | 8  | 0.02  | 0.10 | 8.75E-01 |
| PRTN3    | 12 | -0.07 | 0.21 | 7.37E-01 |
| PSG1     | 6  | 0.00  | 0.31 | 9.93E-01 |

|          |    |       |      |          |
|----------|----|-------|------|----------|
| PSIP1    | 3  | 0.18  | 0.33 | 5.88E-01 |
| PSME1    | 2  | 0.85  | 0.50 | 8.93E-02 |
| PSME2    | 1  | 1.14  | 0.55 | 3.76E-02 |
| PSMG3    | 1  | -0.84 | 1.00 | 4.00E-01 |
| PSPN     | 8  | -0.18 | 0.35 | 6.15E-01 |
| PSRC1    | 2  | 0.08  | 0.28 | 7.70E-01 |
| PTGDS    | 2  | 0.13  | 0.68 | 8.44E-01 |
| PTH1R    | 1  | -0.27 | 0.21 | 1.91E-01 |
| PTN      | 3  | 0.35  | 0.29 | 2.26E-01 |
| PTPN1    | 3  | 0.39  | 0.39 | 3.18E-01 |
| PTPN6    | 2  | 0.00  | 0.53 | 1.00E+00 |
| PTPRF    | 13 | 0.53  | 0.17 | 1.31E-03 |
| PTPRM    | 8  | 0.19  | 0.09 | 2.70E-02 |
| PTPRN2   | 1  | 0.01  | 0.33 | 9.85E-01 |
| PTPRS    | 5  | 0.03  | 0.17 | 8.46E-01 |
| PTS      | 4  | -0.13 | 0.21 | 5.37E-01 |
| PTX3     | 5  | -0.32 | 0.13 | 1.61E-02 |
| PVALB    | 6  | -0.10 | 0.06 | 1.39E-01 |
| PVR      | 2  | 0.04  | 0.07 | 5.46E-01 |
| PXN      | 3  | -0.07 | 0.08 | 3.49E-01 |
| QDPR     | 1  | -0.06 | 0.81 | 9.44E-01 |
| QPCT     | 12 | -0.02 | 0.13 | 9.07E-01 |
| RAB6A    | 2  | -0.27 | 0.19 | 1.47E-01 |
| RABEPK   | 1  | 0.17  | 0.33 | 6.16E-01 |
| RABGAP1L | 2  | 0.45  | 0.52 | 3.91E-01 |
| RAD23B   | 3  | 0.08  | 0.50 | 8.72E-01 |
| RARRES1  | 1  | -0.10 | 0.11 | 3.62E-01 |
| RARRES2  | 3  | 0.15  | 0.24 | 5.15E-01 |
| RASSF2   | 1  | 0.07  | 0.53 | 9.00E-01 |
| RBKS     | 1  | 0.19  | 0.14 | 1.60E-01 |
| RBP2     | 4  | -0.30 | 0.35 | 3.83E-01 |
| RBP5     | 3  | 0.10  | 0.16 | 5.44E-01 |
| RCOR1    | 1  | 0.05  | 0.84 | 9.54E-01 |
| REG1A    | 6  | -0.30 | 0.12 | 1.62E-02 |
| REG1B    | 7  | -0.29 | 0.11 | 8.04E-03 |
| REG3A    | 8  | -0.01 | 0.16 | 9.26E-01 |
| REG4     | 2  | 0.26  | 0.28 | 3.55E-01 |
| RELT     | 4  | -0.05 | 0.15 | 7.21E-01 |
| REN      | 2  | 0.37  | 0.32 | 2.46E-01 |
| RET      | 8  | -0.11 | 0.12 | 3.51E-01 |
| RETN     | 15 | -0.10 | 0.13 | 4.41E-01 |
| RGMA     | 17 | -0.05 | 0.12 | 6.53E-01 |
| RGMB     | 4  | -0.11 | 0.25 | 6.68E-01 |
| RGS8     | 1  | 0.22  | 0.29 | 4.48E-01 |
| RHOC     | 3  | 0.21  | 0.58 | 7.23E-01 |
| RILP     | 4  | -0.09 | 0.37 | 8.13E-01 |
| RNASE3   | 4  | -0.05 | 0.18 | 7.68E-01 |
| RNASET2  | 7  | -0.30 | 0.11 | 8.35E-03 |
| ROBO1    | 8  | -0.25 | 0.18 | 1.62E-01 |
| ROBO2    | 5  | -0.36 | 0.30 | 2.28E-01 |
| ROR1     | 12 | -0.22 | 0.14 | 1.10E-01 |
| RP2      | 2  | -1.04 | 0.43 | 1.56E-02 |
| RRM2     | 1  | 0.30  | 0.83 | 7.20E-01 |
| RRM2B    | 1  | -0.04 | 0.55 | 9.44E-01 |

|           |    |       |      |          |
|-----------|----|-------|------|----------|
| RSPO1     | 10 | 0.02  | 0.17 | 8.99E-01 |
| RSPO3     | 8  | -0.09 | 0.22 | 7.02E-01 |
| RTBDN     | 2  | -0.10 | 0.30 | 7.29E-01 |
| RTN4R     | 9  | -0.21 | 0.16 | 1.82E-01 |
| RUVBL1    | 1  | -0.18 | 0.22 | 4.06E-01 |
| RWDD1     | 2  | 0.50  | 0.34 | 1.40E-01 |
| S100A11   | 2  | -0.13 | 0.22 | 5.38E-01 |
| S100A12   | 4  | 0.05  | 0.19 | 7.96E-01 |
| S100A16   | 3  | 0.14  | 0.34 | 6.76E-01 |
| S100A4    | 4  | 0.02  | 0.46 | 9.61E-01 |
| S100P     | 5  | 0.45  | 0.31 | 1.48E-01 |
| SAMD9L    | 2  | -0.04 | 0.17 | 8.24E-01 |
| SCAMP3    | 4  | 0.25  | 0.36 | 4.82E-01 |
| SCARA5    | 6  | -0.08 | 0.15 | 5.98E-01 |
| SCARB1    | 1  | -0.07 | 0.93 | 9.40E-01 |
| SCARB2    | 4  | -0.33 | 0.20 | 1.05E-01 |
| SCARF1    | 7  | 0.07  | 0.12 | 5.77E-01 |
| SCARF2    | 8  | -0.09 | 0.14 | 5.42E-01 |
| SCG2      | 4  | 0.58  | 0.40 | 1.47E-01 |
| SCG3      | 5  | 0.00  | 0.08 | 9.54E-01 |
| SCGB1A1   | 16 | 0.17  | 0.12 | 1.42E-01 |
| SCGB3A2   | 16 | 0.13  | 0.14 | 3.37E-01 |
| SCGN      | 3  | 0.11  | 0.26 | 6.60E-01 |
| SCLY      | 7  | -0.31 | 0.23 | 1.68E-01 |
| SCP2      | 1  | 0.70  | 0.93 | 4.50E-01 |
| SCRN1     | 2  | 0.22  | 0.36 | 5.38E-01 |
| SDC1      | 13 | -0.08 | 0.16 | 6.10E-01 |
| SDC4      | 20 | 0.17  | 0.13 | 1.66E-01 |
| SELE      | 9  | 0.13  | 0.06 | 3.33E-02 |
| SELP      | 10 | 0.29  | 0.13 | 2.52E-02 |
| SELPLG    | 10 | 0.07  | 0.09 | 4.59E-01 |
| SEMA3F    | 5  | 0.66  | 0.35 | 5.61E-02 |
| SEMA4C    | 4  | 0.78  | 0.21 | 2.36E-04 |
| SEMA4D    | 6  | 0.06  | 0.29 | 8.44E-01 |
| SEMA7A    | 18 | -0.18 | 0.12 | 1.47E-01 |
| SEPTIN9   | 2  | 0.07  | 0.46 | 8.87E-01 |
| SERPINA11 | 8  | 0.01  | 0.08 | 9.45E-01 |
| SERPINA12 | 5  | -0.01 | 0.08 | 8.99E-01 |
| SERPINA9  | 3  | -0.06 | 0.11 | 5.81E-01 |
| SERPINB1  | 3  | 0.22  | 0.41 | 5.85E-01 |
| SERPINB6  | 1  | 0.07  | 0.87 | 9.34E-01 |
| SERPINB8  | 2  | 0.08  | 0.07 | 2.24E-01 |
| SERPINB9  | 2  | 0.04  | 0.39 | 9.13E-01 |
| SERPINE1  | 17 | 0.29  | 0.15 | 5.00E-02 |
| SESTD1    | 3  | -0.29 | 0.38 | 4.50E-01 |
| SETMAR    | 2  | -0.18 | 0.22 | 4.18E-01 |
| SEZ6L     | 8  | -0.14 | 0.22 | 5.26E-01 |
| SEZ6L2    | 8  | -0.16 | 0.20 | 4.18E-01 |
| SF3B4     | 4  | 0.14  | 0.41 | 7.22E-01 |
| SFRP1     | 5  | 0.26  | 0.22 | 2.46E-01 |
| SFTPA1    | 1  | -0.03 | 0.22 | 8.99E-01 |
| SFTPA2    | 6  | -0.14 | 0.08 | 6.24E-02 |
| SFTPD     | 10 | 0.08  | 0.06 | 1.56E-01 |
| SH2B3     | 4  | 0.35  | 0.39 | 3.67E-01 |

|          |    |       |      |          |
|----------|----|-------|------|----------|
| SH2D1A   | 2  | -0.15 | 0.42 | 7.22E-01 |
| SHMT1    | 4  | 0.01  | 0.07 | 9.03E-01 |
| SIAE     | 8  | -0.30 | 0.18 | 9.88E-02 |
| SIGLEC1  | 9  | 0.00  | 0.16 | 9.83E-01 |
| SIGLEC10 | 8  | -0.04 | 0.11 | 7.02E-01 |
| SIGLEC5  | 3  | 0.02  | 0.06 | 7.70E-01 |
| SIGLEC6  | 21 | -0.10 | 0.10 | 3.25E-01 |
| SIGLEC7  | 8  | -0.20 | 0.13 | 1.22E-01 |
| SIGLEC9  | 11 | 0.09  | 0.05 | 1.08E-01 |
| SIRPA    | 8  | 0.02  | 0.04 | 6.39E-01 |
| SIRPB1   | 11 | -0.09 | 0.07 | 2.23E-01 |
| SIRT2    | 3  | -0.06 | 0.30 | 8.46E-01 |
| SIT1     | 6  | -0.32 | 0.27 | 2.42E-01 |
| SKAP1    | 7  | 0.01  | 0.29 | 9.84E-01 |
| SKAP2    | 3  | 0.23  | 0.47 | 6.28E-01 |
| SLAMF1   | 4  | -0.28 | 0.28 | 3.27E-01 |
| SLAMF6   | 3  | -0.23 | 0.25 | 3.51E-01 |
| SLAMF7   | 9  | -0.01 | 0.07 | 9.26E-01 |
| SLAMF8   | 5  | -0.06 | 0.05 | 2.54E-01 |
| SLC16A1  | 4  | 0.06  | 0.30 | 8.46E-01 |
| SLC27A4  | 3  | 0.20  | 0.37 | 5.96E-01 |
| SLC39A14 | 2  | 0.38  | 0.37 | 3.07E-01 |
| SLC39A5  | 8  | 0.27  | 0.22 | 2.21E-01 |
| SLIT2    | 1  | -0.63 | 0.82 | 4.40E-01 |
| SLITRK2  | 11 | -0.44 | 0.20 | 3.00E-02 |
| SLITRK6  | 7  | -0.25 | 0.13 | 4.47E-02 |
| SMAD1    | 5  | 0.20  | 0.38 | 5.95E-01 |
| SMAD5    | 1  | 0.26  | 0.29 | 3.58E-01 |
| SMOC1    | 9  | 0.26  | 0.14 | 7.23E-02 |
| SMOC2    | 5  | 0.05  | 0.13 | 6.78E-01 |
| SMPD1    | 15 | -0.06 | 0.09 | 5.35E-01 |
| SMPDL3A  | 19 | -0.10 | 0.06 | 8.35E-02 |
| SNAP23   | 2  | -0.01 | 0.40 | 9.78E-01 |
| SNAP29   | 5  | 0.39  | 0.33 | 2.35E-01 |
| SNCG     | 1  | -0.01 | 0.05 | 8.13E-01 |
| SNX9     | 2  | 0.06  | 0.45 | 9.01E-01 |
| SOD1     | 3  | 0.19  | 0.40 | 6.31E-01 |
| SOD2     | 9  | 0.04  | 0.19 | 8.40E-01 |
| SORCS2   | 4  | -0.02 | 0.11 | 8.67E-01 |
| SORD     | 3  | 0.24  | 0.31 | 4.45E-01 |
| SORT1    | 12 | 0.00  | 0.15 | 9.95E-01 |
| SOST     | 14 | -0.07 | 0.16 | 6.55E-01 |
| SPARC    | 13 | 0.41  | 0.18 | 1.94E-02 |
| SPARCL1  | 4  | -0.24 | 0.07 | 6.21E-04 |
| SPINK1   | 2  | -0.10 | 0.12 | 4.34E-01 |
| SPINK4   | 5  | -0.04 | 0.06 | 4.80E-01 |
| SPINK5   | 6  | -0.20 | 0.19 | 2.90E-01 |
| SPINK6   | 1  | 0.02  | 0.14 | 8.81E-01 |
| SPINT1   | 8  | -0.15 | 0.13 | 2.55E-01 |
| SPINT2   | 15 | 0.22  | 0.14 | 1.21E-01 |
| SPOCK1   | 11 | -0.09 | 0.21 | 6.50E-01 |
| SPON1    | 6  | 0.25  | 0.15 | 9.08E-02 |
| SPON2    | 1  | 0.08  | 0.24 | 7.37E-01 |
| SPP1     | 7  | -0.29 | 0.30 | 3.36E-01 |



|         |    |       |      |          |
|---------|----|-------|------|----------|
| SPRY2   | 6  | 0.18  | 0.26 | 5.00E-01 |
| SRC     | 1  | 0.99  | 0.91 | 2.79E-01 |
| SRP14   | 2  | -0.28 | 0.41 | 4.93E-01 |
| SRPK2   | 3  | -0.07 | 0.37 | 8.38E-01 |
| SSC4D   | 11 | 0.03  | 0.12 | 7.80E-01 |
| SSC5D   | 10 | -0.18 | 0.18 | 3.12E-01 |
| ST3GAL1 | 7  | -0.06 | 0.15 | 6.99E-01 |
| ST6GAL1 | 6  | -0.03 | 0.24 | 9.10E-01 |
| STAMBP  | 3  | -0.34 | 0.50 | 4.98E-01 |
| STAT5B  | 3  | 0.16  | 0.48 | 7.33E-01 |
| STC1    | 5  | 0.90  | 0.28 | 1.36E-03 |
| STC2    | 5  | -0.80 | 0.40 | 4.60E-02 |
| STIP1   | 2  | -0.05 | 0.50 | 9.25E-01 |
| STK11   | 4  | 0.16  | 0.40 | 6.94E-01 |
| STK24   | 2  | 0.01  | 0.66 | 9.93E-01 |
| STK4    | 4  | 0.37  | 0.40 | 3.46E-01 |
| STX16   | 1  | -0.46 | 0.86 | 5.95E-01 |
| STX4    | 2  | -0.45 | 0.60 | 4.50E-01 |
| STX6    | 1  | 0.49  | 0.95 | 6.08E-01 |
| STX8    | 3  | -0.05 | 0.42 | 9.11E-01 |
| SUGT1   | 1  | -0.05 | 0.77 | 9.44E-01 |
| SULT1A1 | 1  | 0.34  | 0.50 | 5.02E-01 |
| SULT2A1 | 3  | 0.11  | 0.17 | 5.11E-01 |
| SUMF2   | 14 | 0.04  | 0.10 | 6.93E-01 |
| SUSD1   | 4  | 0.47  | 0.24 | 4.78E-02 |
| SUSD2   | 4  | 0.10  | 0.11 | 3.33E-01 |
| TACC3   | 4  | 0.30  | 0.36 | 3.97E-01 |
| TACSTD2 | 13 | -0.08 | 0.06 | 2.04E-01 |
| TAFA5   | 2  | 0.08  | 0.29 | 7.80E-01 |
| TARBP2  | 3  | 0.02  | 0.47 | 9.65E-01 |
| TBC1D17 | 1  | -0.16 | 0.12 | 1.88E-01 |
| TBC1D23 | 4  | 0.43  | 0.28 | 1.17E-01 |
| TBC1D5  | 2  | -0.53 | 0.60 | 3.72E-01 |
| TBCB    | 4  | -0.06 | 0.42 | 8.85E-01 |
| TBCC    | 4  | -0.15 | 0.29 | 6.03E-01 |
| TBL1X   | 5  | 0.51  | 0.28 | 6.77E-02 |
| TCL1A   | 18 | -0.15 | 0.12 | 2.25E-01 |
| TCN2    | 1  | 0.13  | 0.10 | 1.71E-01 |
| TDGF1   | 2  | 0.03  | 0.04 | 4.53E-01 |
| TDRKH   | 4  | 0.32  | 0.15 | 3.10E-02 |
| TEK     | 9  | -0.12 | 0.08 | 1.58E-01 |
| TFF1    | 5  | 0.02  | 0.14 | 8.78E-01 |
| TFF2    | 8  | 0.56  | 0.20 | 4.91E-03 |
| TFF3    | 3  | 0.42  | 0.14 | 2.16E-03 |
| TFPI    | 8  | -0.18 | 0.12 | 1.51E-01 |
| TFPI2   | 8  | -0.25 | 0.21 | 2.23E-01 |
| TFRC    | 10 | 0.12  | 0.08 | 1.48E-01 |
| TGFA    | 4  | -0.62 | 0.30 | 3.48E-02 |
| TGFB1   | 7  | -0.05 | 0.17 | 7.85E-01 |
| TGFBI   | 8  | -0.09 | 0.08 | 2.17E-01 |
| TGFBR2  | 7  | 0.09  | 0.25 | 7.30E-01 |
| TGFBR3  | 6  | 0.01  | 0.22 | 9.70E-01 |
| TGM2    | 2  | 0.07  | 0.28 | 8.10E-01 |
| THBD    | 14 | -0.17 | 0.16 | 2.95E-01 |

|           |    |       |      |          |
|-----------|----|-------|------|----------|
| THBS2     | 7  | 0.08  | 0.11 | 4.25E-01 |
| THBS4     | 5  | -0.21 | 0.14 | 1.46E-01 |
| THOP1     | 1  | -0.02 | 0.20 | 9.10E-01 |
| THPO      | 15 | 0.20  | 0.16 | 2.25E-01 |
| THY1      | 3  | 0.14  | 0.15 | 3.44E-01 |
| TIA1      | 2  | 0.24  | 0.49 | 6.23E-01 |
| TIE1      | 11 | -0.01 | 0.09 | 8.88E-01 |
| TIGAR     | 2  | 0.53  | 0.59 | 3.67E-01 |
| TIMD4     | 23 | -0.02 | 0.10 | 8.48E-01 |
| TIMP1     | 5  | -0.16 | 0.27 | 5.55E-01 |
| TIMP3     | 15 | 0.02  | 0.08 | 8.42E-01 |
| TIMP4     | 4  | 0.21  | 0.14 | 1.35E-01 |
| TINAGL1   | 9  | -0.32 | 0.22 | 1.32E-01 |
| TJAP1     | 1  | -0.05 | 0.78 | 9.44E-01 |
| TLR3      | 6  | 0.01  | 0.05 | 7.66E-01 |
| TMPRSS15  | 7  | 0.25  | 0.16 | 1.11E-01 |
| TMPRSS5   | 17 | -0.07 | 0.06 | 2.85E-01 |
| TMSB10    | 6  | -0.24 | 0.30 | 4.32E-01 |
| TNC       | 15 | -0.02 | 0.10 | 8.24E-01 |
| TNF       | 3  | 0.22  | 0.26 | 4.04E-01 |
| TNFAIP8   | 1  | -1.09 | 0.62 | 7.96E-02 |
| TNFRSF10A | 3  | 0.01  | 0.10 | 9.03E-01 |
| TNFRSF10B | 3  | -0.04 | 0.15 | 7.72E-01 |
| TNFRSF10C | 17 | 0.05  | 0.06 | 3.62E-01 |
| TNFRSF11A | 5  | 0.00  | 0.10 | 9.81E-01 |
| TNFRSF11B | 9  | 0.27  | 0.19 | 1.59E-01 |
| TNFRSF12A | 2  | 0.09  | 0.57 | 8.71E-01 |
| TNFRSF13B | 10 | 0.07  | 0.23 | 7.45E-01 |
| TNFRSF13C | 9  | -0.08 | 0.25 | 7.32E-01 |
| TNFRSF14  | 5  | 0.01  | 0.31 | 9.80E-01 |
| TNFRSF19  | 5  | -0.05 | 0.17 | 7.91E-01 |
| TNFRSF1A  | 7  | -0.08 | 0.27 | 7.70E-01 |
| TNFRSF1B  | 6  | -0.41 | 0.22 | 6.57E-02 |
| TNFRSF21  | 12 | -0.34 | 0.14 | 1.26E-02 |
| TNFRSF4   | 6  | -0.66 | 0.25 | 6.75E-03 |
| TNFRSF6B  | 3  | 0.55  | 0.16 | 4.72E-04 |
| TNFRSF8   | 7  | -0.30 | 0.18 | 9.64E-02 |
| TNFRSF9   | 5  | -0.56 | 0.23 | 1.62E-02 |
| TNFSF10   | 11 | 0.13  | 0.09 | 1.50E-01 |
| TNFSF11   | 8  | 0.15  | 0.13 | 2.57E-01 |
| TNFSF12   | 16 | 0.00  | 0.12 | 9.85E-01 |
| TNFSF13   | 7  | -0.31 | 0.14 | 2.73E-02 |
| TNFSF13B  | 4  | 0.60  | 0.30 | 4.81E-02 |
| TNFSF14   | 5  | 0.15  | 0.17 | 3.81E-01 |
| TNR       | 16 | 0.10  | 0.10 | 2.75E-01 |
| TNXB      | 6  | -0.26 | 0.11 | 2.09E-02 |
| TP53      | 1  | -0.38 | 0.83 | 6.45E-01 |
| TP53INP1  | 2  | -0.01 | 0.43 | 9.78E-01 |
| TPMT      | 2  | -0.05 | 0.10 | 6.01E-01 |
| TPP1      | 11 | -0.30 | 0.13 | 2.38E-02 |
| TPPP3     | 1  | -0.26 | 0.79 | 7.42E-01 |
| TPSAB1    | 13 | 0.03  | 0.06 | 5.97E-01 |
| TRAF2     | 3  | 0.43  | 0.49 | 3.86E-01 |
| TREM2     | 7  | 0.08  | 0.10 | 3.96E-01 |

|         |    |       |      |          |
|---------|----|-------|------|----------|
| TREML2  | 7  | -0.03 | 0.16 | 8.54E-01 |
| TRIAP1  | 6  | 0.25  | 0.23 | 2.79E-01 |
| TRIM21  | 3  | 0.36  | 0.35 | 3.12E-01 |
| TRIM5   | 1  | 0.05  | 0.17 | 7.46E-01 |
| TSHB    | 15 | 0.25  | 0.16 | 1.30E-01 |
| TSPAN1  | 3  | -1.32 | 0.53 | 1.26E-02 |
| TST     | 1  | -0.65 | 0.50 | 1.92E-01 |
| TXLNA   | 3  | 0.08  | 0.38 | 8.33E-01 |
| TXNDC15 | 10 | -0.09 | 0.06 | 1.25E-01 |
| TXNDC5  | 4  | 0.04  | 0.33 | 8.93E-01 |
| TXNRD1  | 4  | 0.06  | 0.42 | 8.93E-01 |
| TYMP    | 2  | -0.09 | 0.25 | 7.29E-01 |
| TYRO3   | 8  | -0.17 | 0.07 | 2.01E-02 |
| UBAC1   | 1  | 0.33  | 0.68 | 6.31E-01 |
| ULBP2   | 6  | -0.71 | 0.23 | 1.94E-03 |
| UMOD    | 15 | 0.00  | 0.06 | 9.67E-01 |
| USO1    | 3  | 0.02  | 0.47 | 9.72E-01 |
| USP8    | 4  | 0.07  | 0.29 | 8.14E-01 |
| UXS1    | 6  | 0.12  | 0.18 | 4.92E-01 |
| VAMP5   | 1  | -2.64 | 0.83 | 1.38E-03 |
| VASH1   | 4  | -0.18 | 0.30 | 5.45E-01 |
| VASN    | 5  | 0.11  | 0.11 | 3.29E-01 |
| VAT1    | 9  | 0.05  | 0.20 | 8.01E-01 |
| VCAM1   | 10 | -0.24 | 0.18 | 1.83E-01 |
| VCAN    | 14 | 0.03  | 0.07 | 6.81E-01 |
| VEGFA   | 13 | 0.00  | 0.06 | 9.67E-01 |
| VEGFC   | 15 | 0.22  | 0.17 | 2.00E-01 |
| VEGFD   | 5  | -0.60 | 0.25 | 1.84E-02 |
| VMO1    | 6  | -0.05 | 0.06 | 4.37E-01 |
| VNN2    | 10 | -0.06 | 0.07 | 3.70E-01 |
| VPS37A  | 2  | -0.53 | 0.66 | 4.26E-01 |
| VPS53   | 2  | 0.19  | 0.63 | 7.64E-01 |
| VSIG4   | 8  | -0.13 | 0.29 | 6.57E-01 |
| VSIR    | 8  | -0.10 | 0.14 | 4.59E-01 |
| VSTM1   | 2  | -0.03 | 0.06 | 6.16E-01 |
| VSTM2L  | 2  | -0.69 | 0.24 | 3.62E-03 |
| VTA1    | 3  | -0.02 | 0.45 | 9.72E-01 |
| VTCN1   | 2  | -0.27 | 0.44 | 5.39E-01 |
| VWA1    | 6  | 0.19  | 0.27 | 4.82E-01 |
| VWC2    | 3  | -0.09 | 0.10 | 3.76E-01 |
| VWF     | 6  | -0.45 | 0.15 | 2.65E-03 |
| WARS    | 3  | -0.28 | 0.20 | 1.54E-01 |
| WAS     | 2  | -0.77 | 0.53 | 1.43E-01 |
| WASF1   | 3  | 0.06  | 0.17 | 7.20E-01 |
| WASF3   | 1  | 0.88  | 0.36 | 1.60E-02 |
| WFDC12  | 11 | -0.43 | 0.16 | 8.36E-03 |
| WFDC2   | 3  | -0.49 | 0.44 | 2.60E-01 |
| WFIKKN1 | 13 | -0.03 | 0.15 | 8.46E-01 |
| WFIKKN2 | 4  | 0.14  | 0.08 | 5.81E-02 |
| WIF1    | 13 | 0.29  | 0.14 | 3.73E-02 |
| WWP2    | 3  | 0.06  | 0.25 | 8.25E-01 |
| XCL1    | 9  | 0.00  | 0.07 | 9.97E-01 |
| XG      | 1  | 0.90  | 0.93 | 3.32E-01 |
| XPNPEP2 | 12 | -0.07 | 0.18 | 7.16E-01 |

|        |   |       |      |          |
|--------|---|-------|------|----------|
| XRCC4  | 1 | -0.32 | 0.77 | 6.73E-01 |
| YES1   | 2 | -0.88 | 0.52 | 8.75E-02 |
| YTHDF3 | 1 | -0.04 | 0.58 | 9.44E-01 |
| ZBTB16 | 7 | 0.10  | 0.14 | 4.45E-01 |
| ZBTB17 | 2 | 0.84  | 0.52 | 1.03E-01 |

**Supplementary Table 16. Associations of genetically predicted proteins with father's attained age using IVW method and cis+trans SNPs.**

| <b>Protein</b> | <b>No. of SNPs</b> | <b>Beta</b> | <b>SE</b> | <b>Pval</b> |
|----------------|--------------------|-------------|-----------|-------------|
| AARSD1         | 3                  | 0.04        | 0.30      | 9.03E-01    |
| ABHD14B        | 3                  | -0.38       | 0.45      | 3.92E-01    |
| ABL1           | 1                  | -0.10       | 0.53      | 8.52E-01    |
| ACAA1          | 3                  | 0.31        | 0.35      | 3.73E-01    |
| ACAN           | 13                 | -0.29       | 0.18      | 1.06E-01    |
| ACE2           | 7                  | 0.28        | 0.23      | 2.22E-01    |
| ACOX1          | 1                  | 0.04        | 0.62      | 9.44E-01    |
| ACP5           | 10                 | -0.12       | 0.12      | 2.99E-01    |
| ACP6           | 2                  | 0.06        | 0.05      | 2.05E-01    |
| ACVRL1         | 3                  | 0.00        | 0.14      | 9.87E-01    |
| ACY1           | 3                  | 0.16        | 0.19      | 3.96E-01    |
| ADA            | 4                  | 0.00        | 0.07      | 9.74E-01    |
| ADA2           | 13                 | -0.15       | 0.13      | 2.53E-01    |
| ADAM15         | 8                  | 0.06        | 0.05      | 2.69E-01    |
| ADAM22         | 6                  | 0.11        | 0.08      | 1.58E-01    |
| ADAM23         | 4                  | 0.01        | 0.08      | 9.39E-01    |
| ADAM8          | 7                  | -0.27       | 0.09      | 3.66E-03    |
| ADAMTS13       | 10                 | 0.11        | 0.11      | 2.92E-01    |
| ADAMTS15       | 2                  | 1.12        | 0.38      | 3.25E-03    |
| ADAMTS16       | 1                  | 0.58        | 0.38      | 1.29E-01    |
| ADAMTS8        | 3                  | -0.02       | 0.10      | 8.24E-01    |
| ADGRB3         | 4                  | 0.10        | 0.05      | 2.99E-02    |
| ADGRE2         | 8                  | -0.08       | 0.13      | 5.26E-01    |
| ADGRE5         | 9                  | -0.24       | 0.16      | 1.29E-01    |
| ADGRG1         | 9                  | -0.11       | 0.19      | 5.72E-01    |
| ADGRG2         | 5                  | -0.23       | 0.30      | 4.46E-01    |
| ADH4           | 6                  | 0.47        | 0.23      | 4.37E-02    |
| ADM            | 1                  | -0.90       | 0.92      | 3.30E-01    |
| AFP            | 19                 | 0.11        | 0.10      | 2.43E-01    |
| AGER           | 12                 | 0.35        | 0.16      | 2.49E-02    |
| AGR2           | 4                  | 0.27        | 0.30      | 3.78E-01    |
| AGR3           | 2                  | -1.02       | 0.47      | 3.12E-02    |
| AGRN           | 6                  | 0.14        | 0.11      | 2.01E-01    |
| AGRP           | 9                  | -1.08       | 0.22      | 1.41E-06    |
| AGXT           | 10                 | -0.28       | 0.22      | 2.00E-01    |
| AHCY           | 1                  | 0.08        | 0.13      | 5.18E-01    |
| AHSP           | 7                  | -0.62       | 0.23      | 7.11E-03    |
| AIF1           | 1                  | 0.71        | 0.40      | 7.49E-02    |
| AIFM1          | 2                  | -0.48       | 0.59      | 4.12E-01    |
| AKR1B1         | 3                  | -0.23       | 0.28      | 3.99E-01    |
| AKR1C4         | 1                  | 1.49        | 0.84      | 7.71E-02    |
| AKT1S1         | 3                  | -0.41       | 0.41      | 3.18E-01    |
| AKT3           | 2                  | -0.19       | 0.60      | 7.49E-01    |
| ALCAM          | 11                 | 0.01        | 0.17      | 9.60E-01    |
| ALDH1A1        | 3                  | 0.19        | 0.34      | 5.76E-01    |
| ALDH3A1        | 1                  | 0.03        | 0.10      | 7.39E-01    |
| ALPP           | 9                  | 0.69        | 0.22      | 1.65E-03    |
| AMBP           | 9                  | -0.04       | 0.16      | 8.08E-01    |
| AMIGO2         | 11                 | -0.03       | 0.12      | 7.98E-01    |
| AMN            | 5                  | 0.03        | 0.06      | 6.34E-01    |
| AMY2A          | 7                  | 0.01        | 0.11      | 9.62E-01    |
| AMY2B          | 8                  | 0.08        | 0.10      | 4.49E-01    |
| ANG            | 3                  | -0.06       | 0.10      | 5.35E-01    |
| ANGPT1         | 16                 | -0.17       | 0.13      | 1.88E-01    |
| ANGPT2         | 6                  | -0.02       | 0.18      | 9.04E-01    |
| ANGPTL1        | 6                  | 0.12        | 0.14      | 3.96E-01    |
| ANGPTL2        | 4                  | -0.50       | 0.28      | 7.63E-02    |
| ANGPTL3        | 5                  | 0.79        | 0.30      | 7.98E-03    |

|          |    |       |      |          |
|----------|----|-------|------|----------|
| ANGPTL4  | 1  | 0.55  | 0.16 | 5.52E-04 |
| ANGPTL7  | 6  | -0.01 | 0.10 | 9.46E-01 |
| ANKRD54  | 1  | -0.14 | 0.66 | 8.35E-01 |
| ANPEP    | 7  | -0.05 | 0.11 | 6.74E-01 |
| ANXA11   | 2  | 0.19  | 0.54 | 7.29E-01 |
| ANXA3    | 5  | -0.20 | 0.29 | 4.98E-01 |
| ANXA4    | 2  | -0.36 | 0.51 | 4.78E-01 |
| ANXA5    | 1  | 0.26  | 0.40 | 5.13E-01 |
| AOC1     | 1  | 0.00  | 0.16 | 9.97E-01 |
| AOC3     | 10 | 0.11  | 0.08 | 1.73E-01 |
| APBB1IP  | 5  | 0.03  | 0.15 | 8.64E-01 |
| APEX1    | 3  | 0.15  | 0.11 | 1.79E-01 |
| APLP1    | 3  | -0.06 | 0.34 | 8.50E-01 |
| APOH     | 1  | 0.25  | 0.09 | 4.21E-03 |
| APOM     | 8  | 0.05  | 0.13 | 7.02E-01 |
| APP      | 14 | -0.09 | 0.15 | 5.50E-01 |
| APRT     | 5  | 0.39  | 0.27 | 1.56E-01 |
| AREG     | 3  | 0.44  | 0.24 | 6.33E-02 |
| ARG1     | 5  | 0.40  | 0.19 | 3.28E-02 |
| ARHGAP1  | 2  | -0.07 | 0.42 | 8.62E-01 |
| ARHGAP25 | 2  | 0.20  | 0.40 | 6.22E-01 |
| ARSA     | 7  | 0.08  | 0.06 | 2.10E-01 |
| ARSB     | 10 | -0.29 | 0.12 | 1.78E-02 |
| ART3     | 4  | -0.32 | 0.37 | 3.86E-01 |
| ARTN     | 1  | -0.56 | 0.68 | 4.13E-01 |
| ASAH2    | 15 | -0.05 | 0.07 | 4.57E-01 |
| ASGR1    | 6  | 0.15  | 0.17 | 4.00E-01 |
| ATF2     | 1  | 0.05  | 0.37 | 8.86E-01 |
| ATG4A    | 3  | -0.41 | 0.44 | 3.53E-01 |
| ATOX1    | 3  | -0.87 | 0.44 | 4.90E-02 |
| ATP5IF1  | 5  | -0.45 | 0.29 | 1.19E-01 |
| ATP6V1F  | 1  | -0.13 | 0.69 | 8.52E-01 |
| ATXN10   | 5  | 0.02  | 0.28 | 9.43E-01 |
| AXIN1    | 3  | -0.46 | 0.46 | 3.15E-01 |
| AXL      | 6  | 0.16  | 0.16 | 3.00E-01 |
| AZU1     | 2  | -0.30 | 0.55 | 5.77E-01 |
| B4GALT1  | 7  | -0.09 | 0.12 | 4.15E-01 |
| B4GAT1   | 8  | 0.31  | 0.12 | 1.18E-02 |
| BACH1    | 3  | 0.14  | 0.48 | 7.73E-01 |
| BAG3     | 1  | -0.76 | 0.71 | 2.90E-01 |
| BAIAP2   | 5  | 0.22  | 0.32 | 4.87E-01 |
| BAMBI    | 1  | 0.13  | 0.67 | 8.52E-01 |
| BANK1    | 3  | -0.28 | 0.30 | 3.44E-01 |
| BAX      | 2  | 0.06  | 0.55 | 9.09E-01 |
| BCAM     | 13 | -0.26 | 0.09 | 5.02E-03 |
| BCAN     | 7  | 0.45  | 0.15 | 3.62E-03 |
| BCL2L11  | 6  | -0.10 | 0.18 | 5.80E-01 |
| BCR      | 1  | -1.15 | 0.70 | 1.00E-01 |
| BGN      | 9  | -0.17 | 0.19 | 3.88E-01 |
| BID      | 2  | 0.64  | 0.43 | 1.36E-01 |
| BIN2     | 2  | -0.17 | 0.52 | 7.45E-01 |
| BIRC2    | 4  | -0.20 | 0.40 | 6.16E-01 |
| BLMH     | 2  | 0.04  | 0.08 | 6.05E-01 |
| BLVRB    | 2  | -0.01 | 0.21 | 9.48E-01 |
| BMP4     | 5  | 0.48  | 0.28 | 8.55E-02 |
| BMP6     | 11 | 0.25  | 0.14 | 7.12E-02 |
| BOC      | 8  | 0.00  | 0.19 | 9.98E-01 |
| BPIFB1   | 13 | -0.03 | 0.09 | 7.53E-01 |
| BRK1     | 6  | 0.02  | 0.19 | 9.01E-01 |
| BSG      | 9  | -0.16 | 0.19 | 3.79E-01 |

|          |    |       |      |          |
|----------|----|-------|------|----------|
| BST1     | 4  | 0.01  | 0.04 | 7.93E-01 |
| BST2     | 11 | -0.05 | 0.18 | 8.02E-01 |
| BTC      | 3  | 0.03  | 0.11 | 7.69E-01 |
| BTN2A1   | 6  | -0.33 | 0.13 | 1.27E-02 |
| BTN3A2   | 3  | 0.01  | 0.07 | 8.44E-01 |
| C19orf12 | 4  | 0.89  | 0.31 | 3.81E-03 |
| C1QA     | 12 | -0.09 | 0.10 | 3.98E-01 |
| C1QTNF1  | 4  | 0.35  | 0.16 | 2.95E-02 |
| C2       | 2  | 0.30  | 0.37 | 4.18E-01 |
| C2CD2L   | 1  | -0.60 | 0.81 | 4.58E-01 |
| C4BPB    | 9  | -0.39 | 0.13 | 2.48E-03 |
| CA1      | 4  | -0.81 | 0.26 | 2.01E-03 |
| CA11     | 2  | -1.55 | 0.26 | 3.52E-09 |
| CA12     | 6  | -0.02 | 0.14 | 8.85E-01 |
| CA13     | 3  | 0.15  | 0.16 | 3.47E-01 |
| CA14     | 4  | 0.05  | 0.22 | 8.28E-01 |
| CA2      | 2  | 0.40  | 0.39 | 3.00E-01 |
| CA3      | 6  | -0.37 | 0.18 | 4.19E-02 |
| CA4      | 8  | 0.15  | 0.11 | 1.88E-01 |
| CA5A     | 5  | -0.06 | 0.07 | 3.43E-01 |
| CA6      | 11 | -0.09 | 0.06 | 1.70E-01 |
| CA9      | 5  | 0.43  | 0.20 | 3.48E-02 |
| CALB1    | 3  | 0.02  | 0.29 | 9.55E-01 |
| CALCA    | 4  | 0.16  | 0.32 | 6.23E-01 |
| CALCOCO1 | 4  | -0.36 | 0.30 | 2.32E-01 |
| CAMKK1   | 3  | -0.20 | 0.15 | 1.94E-01 |
| CANT1    | 5  | -0.10 | 0.23 | 6.58E-01 |
| CAPG     | 2  | 0.02  | 0.05 | 7.66E-01 |
| CARHSP1  | 1  | -0.29 | 0.56 | 6.07E-01 |
| CASP1    | 1  | 0.18  | 0.17 | 2.71E-01 |
| CASP10   | 3  | -0.37 | 0.21 | 7.53E-02 |
| CASP2    | 2  | 0.04  | 0.40 | 9.14E-01 |
| CASP3    | 1  | -0.18 | 0.63 | 7.80E-01 |
| CASP8    | 3  | 0.26  | 0.19 | 1.72E-01 |
| CBLIF    | 9  | 0.29  | 0.09 | 2.08E-03 |
| CBLN4    | 5  | -0.07 | 0.19 | 7.07E-01 |
| CC2D1A   | 2  | -0.77 | 0.49 | 1.17E-01 |
| CCDC80   | 5  | 0.02  | 0.20 | 9.05E-01 |
| CCL11    | 8  | 0.00  | 0.15 | 9.85E-01 |
| CCL13    | 12 | 0.02  | 0.12 | 8.32E-01 |
| CCL14    | 5  | 0.01  | 0.09 | 8.85E-01 |
| CCL15    | 4  | 0.69  | 0.21 | 1.05E-03 |
| CCL16    | 7  | -0.05 | 0.06 | 3.63E-01 |
| CCL17    | 12 | 0.03  | 0.09 | 7.50E-01 |
| CCL18    | 3  | 0.11  | 0.09 | 2.06E-01 |
| CCL19    | 4  | -0.79 | 0.30 | 8.54E-03 |
| CCL2     | 8  | 0.15  | 0.14 | 2.70E-01 |
| CCL20    | 4  | -0.64 | 0.29 | 2.90E-02 |
| CCL21    | 10 | -0.64 | 0.19 | 7.47E-04 |
| CCL22    | 6  | -0.23 | 0.17 | 1.88E-01 |
| CCL23    | 7  | 0.15  | 0.11 | 1.73E-01 |
| CCL24    | 10 | -0.09 | 0.05 | 6.66E-02 |
| CCL25    | 6  | 0.10  | 0.06 | 7.56E-02 |
| CCL26    | 5  | -0.06 | 0.15 | 6.97E-01 |
| CCL27    | 7  | 0.01  | 0.17 | 9.50E-01 |
| CCL28    | 16 | -0.01 | 0.14 | 9.60E-01 |
| CCL3     | 6  | -1.13 | 0.31 | 2.29E-04 |
| CCL4     | 5  | -0.14 | 0.11 | 2.08E-01 |
| CCL5     | 9  | -0.06 | 0.16 | 7.12E-01 |
| CCL7     | 4  | 0.05  | 0.13 | 6.89E-01 |

|         |    |       |      |          |
|---------|----|-------|------|----------|
| CCL8    | 8  | 0.04  | 0.05 | 4.71E-01 |
| CCN1    | 11 | -0.77 | 0.18 | 3.10E-05 |
| CCN2    | 16 | -0.13 | 0.11 | 2.18E-01 |
| CCN3    | 3  | -0.12 | 0.18 | 4.94E-01 |
| CCN4    | 11 | 0.13  | 0.10 | 1.68E-01 |
| CCN5    | 1  | 3.08  | 0.92 | 8.12E-04 |
| CCS     | 1  | -0.04 | 0.09 | 6.37E-01 |
| CD109   | 6  | 0.65  | 0.19 | 7.64E-04 |
| CD14    | 5  | 0.26  | 0.14 | 6.69E-02 |
| CD160   | 14 | 0.00  | 0.09 | 9.99E-01 |
| CD163   | 17 | -0.23 | 0.09 | 1.40E-02 |
| CD164   | 9  | -0.17 | 0.18 | 3.53E-01 |
| CD177   | 3  | -0.08 | 0.09 | 3.62E-01 |
| CD1C    | 17 | -0.45 | 0.12 | 1.73E-04 |
| CD200   | 7  | -0.28 | 0.17 | 9.61E-02 |
| CD200R1 | 9  | -0.12 | 0.05 | 3.44E-02 |
| CD207   | 14 | 0.08  | 0.08 | 3.29E-01 |
| CD209   | 8  | -0.15 | 0.05 | 3.91E-03 |
| CD22    | 18 | 0.11  | 0.12 | 3.41E-01 |
| CD244   | 13 | -0.16 | 0.09 | 8.28E-02 |
| CD27    | 7  | -0.74 | 0.15 | 1.21E-06 |
| CD274   | 6  | 0.04  | 0.13 | 7.86E-01 |
| CD276   | 7  | 0.04  | 0.05 | 4.31E-01 |
| CD28    | 8  | -0.02 | 0.14 | 8.72E-01 |
| CD2AP   | 1  | -0.13 | 0.70 | 8.52E-01 |
| CD300C  | 12 | 0.14  | 0.09 | 1.31E-01 |
| CD300E  | 10 | -0.31 | 0.11 | 5.37E-03 |
| CD300LF | 9  | 0.03  | 0.04 | 5.56E-01 |
| CD300LG | 10 | 0.17  | 0.10 | 1.13E-01 |
| CD302   | 5  | -0.30 | 0.13 | 2.49E-02 |
| CD33    | 7  | -0.03 | 0.04 | 4.94E-01 |
| CD34    | 3  | 0.25  | 0.12 | 3.14E-02 |
| CD38    | 2  | 0.14  | 0.12 | 2.50E-01 |
| CD4     | 4  | -0.18 | 0.12 | 1.55E-01 |
| CD40    | 9  | -0.16 | 0.11 | 1.40E-01 |
| CD40LG  | 12 | -0.14 | 0.17 | 4.22E-01 |
| CD46    | 7  | -0.09 | 0.25 | 7.15E-01 |
| CD48    | 8  | -0.04 | 0.06 | 4.84E-01 |
| CD5     | 8  | -0.61 | 0.18 | 5.01E-04 |
| CD55    | 6  | 0.08  | 0.10 | 4.15E-01 |
| CD58    | 11 | 0.09  | 0.09 | 3.40E-01 |
| CD59    | 5  | 0.11  | 0.17 | 5.24E-01 |
| CD6     | 10 | -0.01 | 0.06 | 8.95E-01 |
| CD63    | 8  | -0.33 | 0.17 | 5.72E-02 |
| CD69    | 5  | -0.23 | 0.24 | 3.45E-01 |
| CD70    | 3  | -0.11 | 0.06 | 5.33E-02 |
| CD74    | 6  | -0.74 | 0.17 | 1.23E-05 |
| CD79B   | 13 | 0.16  | 0.13 | 2.32E-01 |
| CD83    | 12 | -0.11 | 0.15 | 4.78E-01 |
| CD84    | 11 | 0.05  | 0.15 | 7.12E-01 |
| CD8A    | 3  | -0.35 | 0.16 | 2.62E-02 |
| CD93    | 5  | -0.80 | 0.31 | 1.05E-02 |
| CD99    | 4  | 0.23  | 0.31 | 4.52E-01 |
| CD99L2  | 8  | -0.10 | 0.18 | 5.75E-01 |
| CDC27   | 2  | 0.15  | 0.46 | 7.41E-01 |
| CDC37   | 2  | -0.48 | 0.52 | 3.55E-01 |
| CDCP1   | 7  | 0.14  | 0.15 | 3.34E-01 |
| CDH1    | 6  | 0.37  | 0.08 | 8.70E-06 |
| CDH15   | 3  | 0.23  | 0.14 | 1.02E-01 |
| CDH17   | 10 | 0.21  | 0.07 | 3.43E-03 |



|               |    |       |      |          |
|---------------|----|-------|------|----------|
| CDH2          | 13 | -0.16 | 0.17 | 3.54E-01 |
| CDH3          | 6  | 0.09  | 0.28 | 7.54E-01 |
| CDH5          | 11 | -0.07 | 0.07 | 3.04E-01 |
| CDH6          | 6  | -0.10 | 0.08 | 2.37E-01 |
| CDHR1         | 4  | 0.05  | 0.17 | 7.89E-01 |
| CDHR2         | 6  | 1.36  | 0.34 | 6.20E-05 |
| CDHR5         | 7  | 0.05  | 0.08 | 4.83E-01 |
| CDKN1A        | 5  | -0.12 | 0.24 | 6.18E-01 |
| CDKN2D        | 4  | -0.51 | 0.29 | 7.92E-02 |
| CDNF          | 1  | -0.07 | 0.11 | 5.20E-01 |
| CDON          | 4  | 0.21  | 0.28 | 4.65E-01 |
| CDSN          | 17 | 0.36  | 0.16 | 1.99E-02 |
| CEACAM1       | 6  | -0.05 | 0.15 | 7.50E-01 |
| CEACAM21      | 2  | -3.51 | 0.82 | 1.79E-05 |
| CEACAM3       | 1  | -1.12 | 0.63 | 7.57E-02 |
| CEACAM5       | 10 | -0.16 | 0.08 | 4.90E-02 |
| CEACAM8       | 9  | -0.12 | 0.16 | 4.70E-01 |
| CEBPB         | 3  | -0.67 | 0.43 | 1.25E-01 |
| CELA3A        | 14 | -0.25 | 0.11 | 1.74E-02 |
| CEP20         | 4  | -0.35 | 0.27 | 1.90E-01 |
| CEP43         | 6  | 0.14  | 0.30 | 6.40E-01 |
| CEP85         | 2  | -0.21 | 0.33 | 5.19E-01 |
| CERT          | 4  | 0.09  | 0.34 | 7.83E-01 |
| CES1          | 16 | 0.45  | 0.17 | 8.93E-03 |
| CES2          | 2  | -0.63 | 0.32 | 4.90E-02 |
| CES3          | 9  | 0.04  | 0.15 | 7.89E-01 |
| CETN2         | 3  | -0.22 | 0.36 | 5.29E-01 |
| CFC1          | 6  | 0.04  | 0.30 | 9.06E-01 |
| CGA           | 1  | -1.10 | 1.13 | 3.31E-01 |
| CGREF1        | 3  | 0.18  | 0.07 | 1.37E-02 |
| CHAC2         | 2  | 0.60  | 0.31 | 4.92E-02 |
| CHGB          | 5  | 0.01  | 0.07 | 8.73E-01 |
| CHI3L1        | 5  | -0.19 | 0.08 | 1.36E-02 |
| CHIT1         | 3  | 0.02  | 0.05 | 7.35E-01 |
| CHL1          | 6  | 0.06  | 0.12 | 6.25E-01 |
| CHMP1A        | 4  | -0.40 | 0.34 | 2.33E-01 |
| CHRD1         | 3  | 0.12  | 0.46 | 7.97E-01 |
| CHRD2         | 2  | 0.20  | 0.41 | 6.28E-01 |
| CIAPIN1       | 4  | -0.35 | 0.38 | 3.59E-01 |
| CKAP4         | 4  | -0.08 | 0.10 | 4.65E-01 |
| CKMT1A_CKMT1B | 6  | 0.60  | 0.24 | 1.34E-02 |
| CLC           | 8  | -0.29 | 0.18 | 1.11E-01 |
| CLEC10A       | 9  | -0.05 | 0.08 | 4.89E-01 |
| CLEC11A       | 4  | 0.06  | 0.15 | 6.98E-01 |
| CLEC14A       | 8  | 0.21  | 0.13 | 1.11E-01 |
| CLEC1A        | 7  | -0.25 | 0.09 | 3.93E-03 |
| CLEC1B        | 9  | -0.02 | 0.17 | 8.89E-01 |
| CLEC4A        | 11 | -0.01 | 0.08 | 8.68E-01 |
| CLEC4C        | 25 | 0.02  | 0.05 | 6.13E-01 |
| CLEC4D        | 10 | 0.07  | 0.07 | 3.42E-01 |
| CLEC4G        | 10 | -0.37 | 0.11 | 1.18E-03 |
| CLEC5A        | 9  | 0.04  | 0.13 | 7.61E-01 |
| CLEC6A        | 12 | -0.05 | 0.08 | 5.31E-01 |
| CLEC7A        | 3  | -0.05 | 0.05 | 3.34E-01 |
| CLIP2         | 2  | 0.15  | 0.32 | 6.34E-01 |
| CLMP          | 4  | 0.00  | 0.13 | 9.76E-01 |
| CLPS          | 7  | -0.02 | 0.08 | 8.25E-01 |
| CLSPN         | 1  | 0.48  | 0.43 | 2.72E-01 |
| CLSTN2        | 3  | 0.14  | 0.11 | 1.98E-01 |
| CLTA          | 1  | -0.36 | 0.38 | 3.50E-01 |

|         |    |       |      |          |
|---------|----|-------|------|----------|
| CLUL1   | 8  | 0.05  | 0.08 | 5.32E-01 |
| CNDP1   | 7  | -0.16 | 0.10 | 1.01E-01 |
| CNPY2   | 1  | -0.15 | 0.33 | 6.57E-01 |
| CNPY4   | 3  | -0.15 | 0.24 | 5.37E-01 |
| CNST    | 4  | -0.37 | 0.43 | 3.89E-01 |
| CNTN1   | 6  | 0.18  | 0.12 | 1.22E-01 |
| CNTN2   | 6  | 0.02  | 0.05 | 7.54E-01 |
| CNTN3   | 15 | 0.03  | 0.12 | 8.24E-01 |
| CNTN4   | 8  | 0.29  | 0.13 | 3.20E-02 |
| CNTN5   | 6  | -0.03 | 0.10 | 7.40E-01 |
| CNTNAP2 | 4  | -0.03 | 0.08 | 6.98E-01 |
| COL18A1 | 4  | 0.40  | 0.23 | 8.73E-02 |
| COL1A1  | 9  | 0.51  | 0.20 | 1.11E-02 |
| COL4A1  | 9  | 0.39  | 0.12 | 1.95E-03 |
| COL6A3  | 3  | 0.09  | 0.44 | 8.44E-01 |
| COL9A1  | 4  | -0.48 | 0.23 | 4.12E-02 |
| COLEC12 | 4  | 0.03  | 0.27 | 9.01E-01 |
| COMP    | 6  | 0.33  | 0.15 | 3.10E-02 |
| COMT    | 2  | 0.01  | 0.10 | 8.96E-01 |
| CORO1A  | 3  | 0.45  | 0.42 | 2.78E-01 |
| COX5B   | 5  | 0.03  | 0.26 | 9.01E-01 |
| CPA1    | 16 | 0.05  | 0.13 | 6.62E-01 |
| CPA2    | 4  | 0.19  | 0.11 | 9.03E-02 |
| CPB1    | 10 | 0.14  | 0.13 | 2.86E-01 |
| CPE     | 6  | 1.50  | 0.25 | 2.76E-09 |
| CPM     | 9  | 0.35  | 0.21 | 9.53E-02 |
| CPPED1  | 1  | -0.11 | 0.07 | 1.07E-01 |
| CPVL    | 8  | 0.04  | 0.06 | 5.43E-01 |
| CPXM1   | 15 | 0.00  | 0.10 | 9.70E-01 |
| CR2     | 20 | 0.00  | 0.12 | 9.68E-01 |
| CRACR2A | 4  | 0.12  | 0.27 | 6.50E-01 |
| CRADD   | 4  | -0.33 | 0.37 | 3.76E-01 |
| CREG1   | 10 | 0.35  | 0.15 | 1.92E-02 |
| CRELD2  | 11 | -0.05 | 0.12 | 7.00E-01 |
| CRH     | 19 | -0.10 | 0.10 | 3.04E-01 |
| CRHBP   | 4  | -0.02 | 0.08 | 7.46E-01 |
| CRIM1   | 4  | 0.14  | 0.32 | 6.55E-01 |
| CRIP2   | 3  | -0.01 | 0.25 | 9.67E-01 |
| CRISP2  | 12 | 0.00  | 0.08 | 9.84E-01 |
| CRKL    | 1  | -0.19 | 0.69 | 7.80E-01 |
| CRLF1   | 5  | -1.02 | 0.33 | 2.17E-03 |
| CRNN    | 3  | -0.17 | 0.07 | 1.57E-02 |
| CRTAC1  | 1  | 0.03  | 0.07 | 6.33E-01 |
| CRTAM   | 11 | -0.13 | 0.12 | 3.09E-01 |
| CSF1    | 3  | -0.21 | 0.21 | 3.27E-01 |
| CSF2RA  | 1  | 0.23  | 0.58 | 6.89E-01 |
| CSF3    | 2  | -0.19 | 0.23 | 4.16E-01 |
| CST3    | 6  | -0.19 | 0.15 | 1.97E-01 |
| CST5    | 13 | 0.01  | 0.06 | 8.83E-01 |
| CST6    | 12 | 0.22  | 0.14 | 1.16E-01 |
| CST7    | 10 | -0.08 | 0.06 | 1.67E-01 |
| CTF1    | 2  | -0.10 | 0.59 | 8.66E-01 |
| CTRB1   | 11 | 0.21  | 0.08 | 7.69E-03 |
| CTRC    | 11 | -0.09 | 0.07 | 2.29E-01 |
| CTSB    | 7  | 0.07  | 0.08 | 4.15E-01 |
| CTSC    | 7  | -0.03 | 0.07 | 6.39E-01 |
| CTSD    | 6  | 0.01  | 0.12 | 9.11E-01 |
| CTSF    | 14 | -0.10 | 0.11 | 3.94E-01 |
| CTSH    | 1  | 0.30  | 0.51 | 5.60E-01 |
| CTSL    | 15 | 0.06  | 0.14 | 6.76E-01 |

|               |    |       |      |          |
|---------------|----|-------|------|----------|
| CTSO          | 9  | -0.10 | 0.16 | 5.31E-01 |
| CTSS          | 7  | -0.18 | 0.24 | 4.58E-01 |
| CTSV          | 16 | 0.10  | 0.13 | 4.65E-01 |
| CTSZ          | 9  | 0.17  | 0.09 | 5.44E-02 |
| CX3CL1        | 5  | -0.10 | 0.29 | 7.28E-01 |
| CXADR         | 5  | 0.62  | 0.18 | 4.17E-04 |
| CXCL1         | 4  | 0.02  | 0.08 | 7.44E-01 |
| CXCL10        | 3  | -0.25 | 0.14 | 8.03E-02 |
| CXCL11        | 6  | -0.70 | 0.18 | 7.72E-05 |
| CXCL12        | 9  | -0.36 | 0.18 | 4.58E-02 |
| CXCL13        | 7  | -1.57 | 0.26 | 1.92E-09 |
| CXCL14        | 2  | -0.28 | 0.50 | 5.73E-01 |
| CXCL16        | 11 | 0.21  | 0.15 | 1.52E-01 |
| CXCL17        | 5  | -0.24 | 0.32 | 4.50E-01 |
| CXCL3         | 3  | -0.02 | 0.36 | 9.64E-01 |
| CXCL5         | 8  | -0.12 | 0.09 | 1.98E-01 |
| CXCL6         | 6  | 0.03  | 0.08 | 7.15E-01 |
| CXCL8         | 6  | -0.12 | 0.20 | 5.49E-01 |
| CXCL9         | 5  | -1.32 | 0.22 | 1.17E-09 |
| DAB2          | 3  | -0.17 | 0.43 | 6.91E-01 |
| DAG1          | 3  | 0.06  | 0.49 | 9.08E-01 |
| DAPP1         | 2  | -0.33 | 0.38 | 3.90E-01 |
| DARS1         | 4  | -0.20 | 0.34 | 5.60E-01 |
| DBI           | 3  | -0.33 | 0.16 | 4.44E-02 |
| DBNL          | 4  | -0.27 | 0.40 | 5.05E-01 |
| DCBLD2        | 15 | -0.20 | 0.12 | 1.11E-01 |
| DCN           | 1  | 0.45  | 0.72 | 5.31E-01 |
| DCTN1         | 1  | 0.72  | 0.66 | 2.75E-01 |
| DCTN2         | 2  | -0.53 | 0.62 | 3.92E-01 |
| DCTPP1        | 6  | -0.14 | 0.24 | 5.77E-01 |
| DCXR          | 6  | 0.10  | 0.27 | 7.15E-01 |
| DDAH1         | 5  | -0.26 | 0.22 | 2.34E-01 |
| DDC           | 6  | 0.22  | 0.11 | 5.21E-02 |
| DDR1          | 11 | 0.11  | 0.10 | 2.79E-01 |
| DDX58         | 1  | 0.34  | 0.17 | 4.03E-02 |
| DECR1         | 3  | 0.45  | 0.29 | 1.26E-01 |
| DEFA1_DEFA1B  | 13 | -0.50 | 0.17 | 3.23E-03 |
| DEFB4A_DEFB4B | 3  | 1.19  | 0.31 | 1.45E-04 |
| DFFA          | 2  | 0.14  | 0.51 | 7.79E-01 |
| DIABLO        | 3  | 0.38  | 0.48 | 4.32E-01 |
| DKK1          | 9  | -0.03 | 0.15 | 8.35E-01 |
| DKK3          | 7  | 0.42  | 0.11 | 9.61E-05 |
| DKK4          | 5  | -0.02 | 0.14 | 8.73E-01 |
| DKKL1         | 4  | 0.04  | 0.04 | 3.52E-01 |
| DLK1          | 5  | -0.08 | 0.09 | 3.73E-01 |
| DLL1          | 6  | -0.67 | 0.20 | 7.00E-04 |
| DNAJA2        | 1  | -0.80 | 0.73 | 2.71E-01 |
| DNAJB1        | 5  | -0.38 | 0.31 | 2.23E-01 |
| DNAJB8        | 1  | -1.05 | 0.55 | 5.50E-02 |
| DNER          | 6  | 0.09  | 0.29 | 7.42E-01 |
| DNMBP         | 3  | -0.03 | 0.33 | 9.32E-01 |
| DNPH1         | 1  | -0.43 | 0.15 | 5.39E-03 |
| DOK2          | 4  | -0.08 | 0.35 | 8.15E-01 |
| DPEP1         | 5  | 0.43  | 0.25 | 7.88E-02 |
| DPEP2         | 3  | -0.16 | 0.15 | 2.69E-01 |
| DPP10         | 5  | 0.14  | 0.14 | 3.23E-01 |
| DPP4          | 5  | 0.01  | 0.17 | 9.69E-01 |
| DPP6          | 7  | 0.20  | 0.14 | 1.47E-01 |
| DPP7          | 5  | -0.04 | 0.18 | 8.43E-01 |
| DPT           | 2  | 0.12  | 0.13 | 3.87E-01 |

|           |    |       |      |          |
|-----------|----|-------|------|----------|
| DPY30     | 2  | 0.91  | 0.58 | 1.16E-01 |
| DRAXIN    | 15 | -0.06 | 0.12 | 5.89E-01 |
| DRG2      | 3  | -0.38 | 0.32 | 2.30E-01 |
| DSC2      | 9  | 0.07  | 0.14 | 6.52E-01 |
| DSG2      | 9  | 0.06  | 0.14 | 6.53E-01 |
| DSG3      | 15 | 0.09  | 0.11 | 4.01E-01 |
| DSG4      | 20 | 0.09  | 0.13 | 5.12E-01 |
| DTX3      | 3  | -0.36 | 0.23 | 1.23E-01 |
| DUSP3     | 2  | -0.55 | 0.48 | 2.54E-01 |
| EBAG9     | 5  | -0.47 | 0.31 | 1.26E-01 |
| EBI3_IL27 | 14 | -0.29 | 0.14 | 3.48E-02 |
| ECE1      | 5  | -0.09 | 0.21 | 6.77E-01 |
| EDA2R     | 3  | -0.55 | 0.50 | 2.75E-01 |
| EDAR      | 20 | 0.02  | 0.08 | 8.20E-01 |
| EDIL3     | 3  | -0.01 | 0.25 | 9.77E-01 |
| EFEMP1    | 3  | 0.16  | 0.22 | 4.70E-01 |
| EFNA1     | 4  | 0.13  | 0.13 | 3.08E-01 |
| EFNA4     | 4  | -0.98 | 0.27 | 2.63E-04 |
| EGF       | 8  | -0.11 | 0.20 | 5.83E-01 |
| EGFL7     | 17 | -0.24 | 0.13 | 6.54E-02 |
| EGFR      | 5  | -0.24 | 0.31 | 4.48E-01 |
| EGLN1     | 3  | -0.34 | 0.26 | 1.96E-01 |
| EIF4B     | 3  | -0.37 | 0.38 | 3.32E-01 |
| EIF4G1    | 3  | -0.30 | 0.38 | 4.29E-01 |
| ELOA      | 2  | -0.06 | 0.31 | 8.48E-01 |
| ENAH      | 1  | 0.83  | 0.42 | 4.77E-02 |
| ENG       | 7  | 0.14  | 0.08 | 1.07E-01 |
| ENO1      | 4  | -0.09 | 0.25 | 7.19E-01 |
| ENO2      | 5  | -0.22 | 0.23 | 3.32E-01 |
| ENPP2     | 8  | 0.18  | 0.15 | 2.37E-01 |
| ENPP5     | 6  | 0.13  | 0.06 | 2.21E-02 |
| ENPP7     | 6  | -0.02 | 0.05 | 6.44E-01 |
| ENTPD2    | 2  | 1.01  | 0.61 | 9.73E-02 |
| ENTPD5    | 8  | 0.01  | 0.09 | 9.42E-01 |
| ENTPD6    | 8  | -0.15 | 0.05 | 2.46E-03 |
| EPCAM     | 11 | 0.35  | 0.12 | 2.84E-03 |
| EPHA1     | 7  | -0.22 | 0.17 | 2.07E-01 |
| EPHA2     | 6  | -0.01 | 0.23 | 9.52E-01 |
| EPHB4     | 9  | 0.07  | 0.12 | 5.53E-01 |
| EPHB6     | 4  | -0.13 | 0.14 | 3.68E-01 |
| EPO       | 9  | 0.20  | 0.17 | 2.22E-01 |
| EPS8L2    | 3  | 0.11  | 0.15 | 4.45E-01 |
| ERBB2     | 8  | -0.42 | 0.20 | 3.53E-02 |
| ERBB3     | 8  | -0.10 | 0.11 | 3.66E-01 |
| ERBB4     | 14 | 0.10  | 0.14 | 4.93E-01 |
| ERBIN     | 3  | -1.12 | 0.48 | 1.95E-02 |
| EREG      | 8  | -0.21 | 0.22 | 3.30E-01 |
| ERP44     | 5  | -0.08 | 0.12 | 4.80E-01 |
| ESAM      | 7  | -0.13 | 0.14 | 3.71E-01 |
| ESM1      | 10 | -0.13 | 0.17 | 4.53E-01 |
| EZR       | 2  | -0.27 | 0.53 | 6.14E-01 |
| F11R      | 11 | -0.37 | 0.22 | 9.91E-02 |
| F2R       | 7  | -0.17 | 0.20 | 3.91E-01 |
| F3        | 8  | 0.44  | 0.10 | 3.30E-05 |
| F7        | 7  | -0.02 | 0.08 | 7.71E-01 |
| F9        | 2  | -0.24 | 0.36 | 5.16E-01 |
| FABP1     | 2  | -0.18 | 0.20 | 3.50E-01 |
| FABP2     | 5  | 0.19  | 0.18 | 2.92E-01 |
| FABP4     | 1  | -0.84 | 0.65 | 1.97E-01 |
| FABP5     | 2  | -0.03 | 0.37 | 9.41E-01 |

|           |    |       |      |          |
|-----------|----|-------|------|----------|
| FABP6     | 3  | 0.24  | 0.17 | 1.64E-01 |
| FABP9     | 15 | 0.14  | 0.09 | 1.07E-01 |
| FADD      | 3  | 0.62  | 0.41 | 1.33E-01 |
| FAM3B     | 6  | -0.21 | 0.07 | 4.37E-03 |
| FAM3C     | 1  | -0.65 | 0.73 | 3.73E-01 |
| FAP       | 5  | -0.18 | 0.16 | 2.69E-01 |
| FAS       | 3  | -0.14 | 0.17 | 4.00E-01 |
| FASLG     | 18 | -0.42 | 0.10 | 3.26E-05 |
| FBP1      | 5  | 0.14  | 0.14 | 2.93E-01 |
| FCAR      | 13 | -0.15 | 0.06 | 9.69E-03 |
| FCER2     | 10 | 0.11  | 0.12 | 3.49E-01 |
| FCGR2A    | 5  | 0.04  | 0.05 | 4.11E-01 |
| FCGR2B    | 4  | -0.11 | 0.09 | 2.04E-01 |
| FCGR3B    | 12 | -0.03 | 0.13 | 8.07E-01 |
| FCN2      | 10 | 0.07  | 0.06 | 2.66E-01 |
| FCRL1     | 22 | -0.12 | 0.09 | 1.94E-01 |
| FCRL2     | 12 | -0.09 | 0.07 | 2.25E-01 |
| FCRL3     | 5  | -0.05 | 0.05 | 2.34E-01 |
| FCRL5     | 9  | 0.32  | 0.17 | 5.84E-02 |
| FCRL6     | 5  | -0.02 | 0.06 | 7.05E-01 |
| FCRLB     | 6  | 0.01  | 0.07 | 8.86E-01 |
| FEN1      | 1  | 0.96  | 0.83 | 2.50E-01 |
| FES       | 1  | 1.78  | 0.33 | 4.80E-08 |
| FETUB     | 3  | -0.53 | 0.29 | 6.88E-02 |
| FGF19     | 4  | 0.54  | 0.16 | 8.31E-04 |
| FGF2      | 6  | -0.11 | 0.06 | 7.85E-02 |
| FGF21     | 7  | -0.25 | 0.18 | 1.79E-01 |
| FGF23     | 4  | -0.05 | 0.26 | 8.57E-01 |
| FGF5      | 2  | -0.22 | 0.07 | 1.62E-03 |
| FGFBP1    | 10 | 0.09  | 0.22 | 6.86E-01 |
| FGFR2     | 7  | -0.20 | 0.24 | 4.02E-01 |
| FGR       | 1  | -0.54 | 0.48 | 2.57E-01 |
| FHIT      | 2  | 0.02  | 0.41 | 9.66E-01 |
| FIS1      | 4  | -0.04 | 0.24 | 8.54E-01 |
| FKBP1B    | 4  | 0.26  | 0.18 | 1.46E-01 |
| FKBP4     | 5  | -0.87 | 0.32 | 5.97E-03 |
| FKBP5     | 5  | -0.16 | 0.20 | 4.13E-01 |
| FLI1      | 3  | -0.10 | 0.42 | 8.12E-01 |
| FLRT2     | 11 | 0.10  | 0.07 | 1.70E-01 |
| FLT1      | 9  | -0.11 | 0.11 | 2.97E-01 |
| FLT3      | 5  | 0.24  | 0.27 | 3.68E-01 |
| FLT3LG    | 19 | 0.03  | 0.11 | 7.67E-01 |
| FLT4      | 10 | -0.06 | 0.06 | 2.68E-01 |
| FOLR1     | 7  | -0.45 | 0.21 | 3.42E-02 |
| FOLR2     | 14 | -0.13 | 0.13 | 3.12E-01 |
| FOLR3     | 9  | 0.07  | 0.22 | 7.68E-01 |
| FOXO1     | 3  | 0.15  | 0.28 | 5.87E-01 |
| FOXO3     | 1  | 1.31  | 0.79 | 9.80E-02 |
| FRZB      | 2  | -0.13 | 0.10 | 1.82E-01 |
| FST       | 3  | -0.06 | 0.24 | 7.91E-01 |
| FSTL3     | 2  | -0.02 | 0.42 | 9.69E-01 |
| FUCA1     | 5  | 0.00  | 0.04 | 9.64E-01 |
| FURIN     | 3  | -1.05 | 0.20 | 2.19E-07 |
| FUS       | 2  | 0.38  | 0.44 | 3.83E-01 |
| FUT3_FUT5 | 11 | 0.11  | 0.08 | 1.80E-01 |
| FUT8      | 11 | -0.01 | 0.06 | 8.13E-01 |
| FXN       | 3  | -0.28 | 0.46 | 5.45E-01 |
| FXYD5     | 2  | -0.28 | 0.47 | 5.55E-01 |
| FYB1      | 2  | -0.22 | 0.50 | 6.56E-01 |
| GAL       | 17 | 0.00  | 0.11 | 9.68E-01 |

|         |    |       |      |          |
|---------|----|-------|------|----------|
| GALNT10 | 9  | -0.16 | 0.11 | 1.42E-01 |
| GALNT2  | 6  | 0.24  | 0.13 | 6.05E-02 |
| GALNT3  | 8  | 0.04  | 0.10 | 6.89E-01 |
| GALNT7  | 5  | 0.01  | 0.14 | 9.54E-01 |
| GAS6    | 15 | 0.02  | 0.10 | 7.99E-01 |
| GBP2    | 1  | 0.00  | 0.43 | 9.96E-01 |
| GCG     | 5  | 0.34  | 0.35 | 3.27E-01 |
| GCNT1   | 4  | -1.13 | 0.26 | 1.01E-05 |
| GDF15   | 1  | -0.21 | 0.16 | 1.87E-01 |
| GDF2    | 11 | 0.16  | 0.17 | 3.48E-01 |
| GDNF    | 1  | -0.20 | 0.19 | 2.91E-01 |
| GFAP    | 7  | -0.86 | 0.23 | 1.42E-04 |
| GFRA1   | 4  | -0.06 | 0.16 | 6.91E-01 |
| GFRA2   | 6  | -0.10 | 0.13 | 4.09E-01 |
| GFRA3   | 20 | 0.17  | 0.13 | 1.81E-01 |
| GGH     | 9  | 0.07  | 0.10 | 4.60E-01 |
| GGT1    | 7  | 0.36  | 0.14 | 1.16E-02 |
| GGT5    | 4  | 0.49  | 0.15 | 9.64E-04 |
| GHRL    | 8  | 0.25  | 0.16 | 1.11E-01 |
| GKN1    | 4  | 0.82  | 0.33 | 1.27E-02 |
| GLB1    | 8  | -0.04 | 0.11 | 7.14E-01 |
| GLO1    | 1  | -0.21 | 0.13 | 1.15E-01 |
| GLOD4   | 2  | -0.19 | 0.58 | 7.45E-01 |
| GLRX    | 2  | 0.11  | 0.09 | 2.04E-01 |
| GLT8D2  | 1  | 0.21  | 0.25 | 3.93E-01 |
| GMPR    | 2  | 0.30  | 0.17 | 8.39E-02 |
| GNE     | 3  | -0.02 | 0.30 | 9.40E-01 |
| GPLY    | 8  | -0.04 | 0.07 | 5.93E-01 |
| GOLM2   | 8  | 0.08  | 0.12 | 4.75E-01 |
| GOPC    | 2  | -0.15 | 0.48 | 7.55E-01 |
| GP1BA   | 14 | -0.71 | 0.15 | 4.34E-06 |
| GP2     | 8  | -0.18 | 0.07 | 1.30E-02 |
| GP6     | 6  | -0.26 | 0.13 | 4.69E-02 |
| GPA33   | 10 | 0.23  | 0.11 | 3.41E-02 |
| GPC1    | 14 | -0.26 | 0.18 | 1.54E-01 |
| GPC5    | 10 | -0.12 | 0.06 | 2.79E-02 |
| GNMB    | 5  | 0.18  | 0.12 | 1.27E-01 |
| GPR37   | 10 | -0.10 | 0.06 | 1.16E-01 |
| GRAP2   | 3  | 0.25  | 0.42 | 5.58E-01 |
| GRK5    | 1  | 0.04  | 0.17 | 7.87E-01 |
| GRN     | 10 | -0.37 | 0.07 | 1.73E-08 |
| GRPEL1  | 3  | 0.00  | 0.37 | 9.98E-01 |
| GSAP    | 1  | 0.50  | 0.72 | 4.83E-01 |
| GSTA1   | 9  | 0.12  | 0.12 | 3.31E-01 |
| GSTA3   | 5  | 0.09  | 0.13 | 4.90E-01 |
| GSTP1   | 1  | -0.10 | 0.21 | 6.25E-01 |
| GUCA2A  | 7  | -0.29 | 0.17 | 8.18E-02 |
| GUSB    | 10 | 0.04  | 0.12 | 7.36E-01 |
| GYS1    | 3  | -0.05 | 0.17 | 7.86E-01 |
| GZMA    | 13 | -0.12 | 0.13 | 3.38E-01 |
| GZMB    | 8  | -0.92 | 0.21 | 1.28E-05 |
| GZMH    | 7  | 0.42  | 0.17 | 1.47E-02 |
| HAGH    | 1  | -0.24 | 0.37 | 5.13E-01 |
| HAO1    | 8  | -0.30 | 0.25 | 2.31E-01 |
| HARS1   | 2  | -0.35 | 0.49 | 4.84E-01 |
| HAVCR1  | 6  | -0.21 | 0.09 | 1.79E-02 |
| HAVCR2  | 8  | -0.14 | 0.14 | 3.27E-01 |
| HBEGF   | 20 | -0.12 | 0.12 | 3.46E-01 |
| HBQ1    | 2  | -0.24 | 0.12 | 4.39E-02 |
| HCLS1   | 3  | 0.61  | 0.38 | 1.01E-01 |

|             |    |       |      |          |
|-------------|----|-------|------|----------|
| HDGF        | 2  | 0.06  | 0.04 | 1.10E-01 |
| HEBP1       | 1  | 0.26  | 0.36 | 4.62E-01 |
| HEXIM1      | 4  | -0.11 | 0.27 | 6.87E-01 |
| HGF         | 5  | -0.23 | 0.22 | 2.99E-01 |
| HGS         | 4  | -0.48 | 0.39 | 2.20E-01 |
| HLA-DRA     | 3  | -0.28 | 0.08 | 6.33E-04 |
| HLA-E       | 4  | -0.26 | 0.11 | 2.53E-02 |
| HMOX1       | 15 | 0.23  | 0.15 | 1.34E-01 |
| HMOX2       | 4  | -1.28 | 0.27 | 1.80E-06 |
| HNMT        | 4  | -0.04 | 0.06 | 5.42E-01 |
| HNRNPK      | 1  | -0.21 | 0.74 | 7.80E-01 |
| HPGDS       | 1  | -0.44 | 0.68 | 5.16E-01 |
| HS3ST3B1    | 7  | -0.15 | 0.12 | 1.96E-01 |
| HS6ST1      | 14 | -0.02 | 0.12 | 8.67E-01 |
| HSD11B1     | 7  | -0.08 | 0.14 | 5.90E-01 |
| HSPA1A      | 3  | -0.36 | 0.33 | 2.78E-01 |
| HSPB1       | 5  | 0.00  | 0.28 | 9.96E-01 |
| HSPB6       | 4  | 0.74  | 0.45 | 9.90E-02 |
| HSPG2       | 4  | 0.07  | 0.24 | 7.85E-01 |
| HTRA2       | 1  | -0.24 | 0.84 | 7.80E-01 |
| HYAL1       | 4  | -0.14 | 0.15 | 3.57E-01 |
| HYOU1       | 13 | -0.33 | 0.14 | 2.39E-02 |
| ICA1        | 2  | 0.07  | 0.21 | 7.42E-01 |
| ICAM1       | 6  | 0.05  | 0.10 | 6.37E-01 |
| ICAM2       | 9  | 0.01  | 0.04 | 8.77E-01 |
| ICAM3       | 20 | 0.02  | 0.09 | 7.89E-01 |
| ICAM4       | 14 | -0.13 | 0.06 | 3.25E-02 |
| ICAM5       | 5  | 0.19  | 0.06 | 6.60E-04 |
| ICOSLG      | 4  | 0.07  | 0.11 | 5.30E-01 |
| IDI2        | 1  | 0.28  | 0.14 | 3.57E-02 |
| IDS         | 3  | 0.18  | 0.20 | 3.58E-01 |
| IDUA        | 13 | 0.10  | 0.07 | 1.56E-01 |
| IFNG        | 2  | 0.11  | 0.57 | 8.54E-01 |
| IFNGR1      | 10 | -0.14 | 0.14 | 2.93E-01 |
| IFNGR2      | 8  | -0.12 | 0.04 | 4.56E-03 |
| IFNL1       | 3  | 0.13  | 0.36 | 7.24E-01 |
| IFNLR1      | 2  | -1.03 | 0.44 | 1.98E-02 |
| IGF1R       | 9  | 0.17  | 0.10 | 8.89E-02 |
| IGF2R       | 14 | -0.01 | 0.10 | 9.01E-01 |
| IGFBP1      | 2  | -1.86 | 0.44 | 2.73E-05 |
| IGFBP2      | 2  | 0.21  | 0.53 | 6.97E-01 |
| IGFBP3      | 5  | -0.03 | 0.09 | 7.73E-01 |
| IGFBP4      | 3  | -0.05 | 0.47 | 9.21E-01 |
| IGFBP6      | 3  | -0.27 | 0.46 | 5.56E-01 |
| IGFBP7      | 3  | 0.39  | 0.13 | 2.76E-03 |
| IGFBPL1     | 2  | 0.14  | 0.11 | 2.16E-01 |
| IGSF3       | 5  | 0.00  | 0.22 | 9.92E-01 |
| IGSF8       | 5  | -0.40 | 0.23 | 8.13E-02 |
| IKBKG       | 1  | -0.17 | 0.89 | 8.52E-01 |
| IKZF2       | 1  | 0.09  | 0.43 | 8.25E-01 |
| IL10        | 5  | -0.44 | 0.18 | 1.54E-02 |
| IL10RA      | 1  | -0.51 | 0.31 | 1.01E-01 |
| IL10RB      | 6  | 0.07  | 0.08 | 4.07E-01 |
| IL11        | 1  | -0.88 | 0.81 | 2.82E-01 |
| IL12A_IL12B | 15 | -0.12 | 0.08 | 1.11E-01 |
| IL12B       | 16 | -0.06 | 0.07 | 4.32E-01 |
| IL12RB1     | 3  | -0.06 | 0.09 | 4.98E-01 |
| IL13        | 1  | -0.30 | 0.49 | 5.33E-01 |
| IL13RA1     | 2  | -0.40 | 0.47 | 4.02E-01 |
| IL15        | 21 | 0.29  | 0.13 | 2.27E-02 |

|          |    |       |      |          |
|----------|----|-------|------|----------|
| IL15RA   | 1  | -0.01 | 0.19 | 9.74E-01 |
| IL16     | 1  | -0.74 | 0.68 | 2.77E-01 |
| IL17C    | 2  | 0.23  | 0.33 | 4.85E-01 |
| IL17D    | 2  | -0.10 | 0.12 | 3.93E-01 |
| IL17F    | 1  | -1.52 | 0.70 | 2.87E-02 |
| IL17RA   | 3  | -0.03 | 0.05 | 5.36E-01 |
| IL17RB   | 9  | -0.01 | 0.05 | 8.17E-01 |
| IL18     | 8  | 0.16  | 0.11 | 1.42E-01 |
| IL18BP   | 9  | -0.70 | 0.18 | 1.28E-04 |
| IL18R1   | 12 | -0.07 | 0.06 | 2.05E-01 |
| IL18RAP  | 3  | -0.22 | 0.28 | 4.43E-01 |
| IL19     | 3  | -0.21 | 0.09 | 2.07E-02 |
| IL1A     | 1  | -0.61 | 0.39 | 1.16E-01 |
| IL1B     | 2  | 0.17  | 0.17 | 3.26E-01 |
| IL1R1    | 13 | -0.22 | 0.10 | 3.32E-02 |
| IL1R2    | 13 | 0.05  | 0.08 | 5.25E-01 |
| IL1RAP   | 3  | -0.03 | 0.53 | 9.62E-01 |
| IL1RL1   | 12 | 0.01  | 0.06 | 8.51E-01 |
| IL1RL2   | 12 | -0.04 | 0.09 | 6.67E-01 |
| IL1RN    | 2  | -0.19 | 0.20 | 3.42E-01 |
| IL20RA   | 1  | 1.28  | 0.61 | 3.58E-02 |
| IL22RA1  | 2  | 0.26  | 0.15 | 8.23E-02 |
| IL2RA    | 8  | -0.18 | 0.08 | 1.80E-02 |
| IL32     | 7  | 0.03  | 0.15 | 8.26E-01 |
| IL33     | 1  | -2.28 | 0.84 | 6.52E-03 |
| IL34     | 1  | 0.02  | 0.06 | 7.41E-01 |
| IL3RA    | 4  | -0.39 | 0.29 | 1.77E-01 |
| IL4R     | 5  | -0.07 | 0.12 | 5.51E-01 |
| IL5RA    | 22 | 0.13  | 0.09 | 1.42E-01 |
| IL6      | 4  | 0.25  | 0.17 | 1.57E-01 |
| IL6R     | 5  | 0.08  | 0.04 | 3.72E-02 |
| IL6ST    | 11 | 0.09  | 0.11 | 4.07E-01 |
| IL7      | 3  | -0.29 | 0.35 | 4.04E-01 |
| IL7R     | 10 | 0.10  | 0.05 | 2.39E-02 |
| ILKAP    | 1  | -0.21 | 0.76 | 7.80E-01 |
| IMPA1    | 2  | -0.21 | 0.22 | 3.23E-01 |
| ING1     | 1  | -0.23 | 0.83 | 7.80E-01 |
| INHBC    | 6  | -0.14 | 0.08 | 6.50E-02 |
| INPP1    | 3  | 0.15  | 0.33 | 6.51E-01 |
| IPCEF1   | 2  | -0.44 | 0.42 | 2.98E-01 |
| IQGAP2   | 1  | 0.32  | 0.30 | 2.96E-01 |
| IRAG2    | 1  | 1.07  | 0.67 | 1.07E-01 |
| IRAK1    | 1  | -0.14 | 0.77 | 8.52E-01 |
| IRAK4    | 1  | 0.26  | 0.61 | 6.66E-01 |
| ISLR2    | 7  | 0.22  | 0.08 | 3.44E-03 |
| ISM1     | 1  | -0.04 | 0.25 | 8.66E-01 |
| ITGA11   | 4  | 0.00  | 0.16 | 9.81E-01 |
| ITGA5    | 9  | -0.44 | 0.18 | 1.40E-02 |
| ITGA6    | 3  | 0.22  | 0.17 | 1.99E-01 |
| ITGAM    | 10 | 0.04  | 0.15 | 7.94E-01 |
| ITGAV    | 6  | 0.18  | 0.20 | 3.67E-01 |
| ITGB1    | 6  | 0.32  | 0.20 | 9.82E-02 |
| ITGB1BP2 | 4  | -0.81 | 0.32 | 1.04E-02 |
| ITGB2    | 10 | -0.06 | 0.14 | 6.85E-01 |
| ITGB5    | 5  | -0.04 | 0.28 | 8.76E-01 |
| ITGB6    | 9  | 0.26  | 0.14 | 6.00E-02 |
| ITGB7    | 16 | 0.04  | 0.08 | 6.22E-01 |
| ITIH3    | 7  | 0.01  | 0.12 | 9.55E-01 |
| ITM2A    | 1  | -0.06 | 0.20 | 7.53E-01 |
| JAM2     | 4  | 0.71  | 0.25 | 4.91E-03 |



|                |    |       |      |          |
|----------------|----|-------|------|----------|
| JCHAIN         | 12 | -0.04 | 0.20 | 8.30E-01 |
| KAZALD1        | 3  | -0.21 | 0.45 | 6.41E-01 |
| KDR            | 11 | -0.03 | 0.08 | 7.00E-01 |
| KEL            | 14 | 0.18  | 0.09 | 3.88E-02 |
| KIFBP          | 3  | 0.05  | 0.30 | 8.63E-01 |
| KIR2DL3        | 2  | -1.98 | 0.46 | 1.44E-05 |
| KIR3DL1        | 2  | 0.02  | 0.05 | 6.05E-01 |
| KIRREL2        | 7  | -0.24 | 0.11 | 2.63E-02 |
| KIT            | 18 | -0.02 | 0.12 | 8.94E-01 |
| KITLG          | 15 | 0.28  | 0.11 | 1.22E-02 |
| KLB            | 7  | -0.04 | 0.06 | 4.73E-01 |
| KLK1           | 12 | -0.14 | 0.05 | 4.01E-03 |
| KLK10          | 3  | 0.06  | 0.08 | 3.92E-01 |
| KLK11          | 2  | 0.40  | 0.49 | 4.16E-01 |
| KLK12          | 5  | 0.01  | 0.04 | 7.57E-01 |
| KLK13          | 10 | 0.00  | 0.09 | 9.62E-01 |
| KLK14          | 9  | 0.11  | 0.10 | 2.77E-01 |
| KLK4           | 3  | 0.05  | 0.11 | 6.50E-01 |
| KLK6           | 2  | -0.05 | 0.23 | 8.15E-01 |
| KLK8           | 3  | -0.05 | 0.10 | 5.93E-01 |
| KLRB1          | 10 | -0.40 | 0.17 | 1.67E-02 |
| KLRD1          | 10 | -0.04 | 0.08 | 6.39E-01 |
| KRT18          | 6  | -0.06 | 0.30 | 8.53E-01 |
| KRT19          | 3  | 0.70  | 0.27 | 9.74E-03 |
| KRT5           | 4  | 0.18  | 0.22 | 4.11E-01 |
| KYAT1          | 4  | 0.00  | 0.32 | 1.00E+00 |
| KYNU           | 3  | 0.15  | 0.17 | 3.70E-01 |
| L1CAM          | 6  | 0.06  | 0.18 | 7.39E-01 |
| LACTB2         | 3  | -0.04 | 0.22 | 8.41E-01 |
| LAG3           | 10 | -0.66 | 0.14 | 2.06E-06 |
| LAIR1          | 3  | -2.67 | 0.52 | 2.97E-07 |
| LAIR2          | 3  | -0.03 | 0.06 | 5.91E-01 |
| LAMA4          | 11 | 0.15  | 0.14 | 2.56E-01 |
| LAMP2          | 2  | -1.05 | 0.56 | 6.00E-02 |
| LAMP3          | 8  | -0.77 | 0.27 | 3.64E-03 |
| LAT            | 5  | -0.66 | 0.29 | 2.47E-02 |
| LAT2           | 1  | -0.13 | 0.71 | 8.52E-01 |
| LAYN           | 3  | 0.15  | 0.11 | 1.84E-01 |
| LBP            | 2  | 0.04  | 0.07 | 5.84E-01 |
| LBR            | 5  | 0.01  | 0.21 | 9.49E-01 |
| LCN2           | 16 | 0.15  | 0.15 | 3.27E-01 |
| LDLR           | 15 | -0.96 | 0.15 | 1.91E-10 |
| LEFTY2         | 3  | 3.03  | 0.43 | 2.41E-12 |
| LEP            | 1  | -2.50 | 1.01 | 1.32E-02 |
| LEPR           | 9  | -0.22 | 0.14 | 1.27E-01 |
| LGALS1         | 2  | 0.06  | 0.16 | 6.95E-01 |
| LGALS3         | 4  | -0.91 | 0.31 | 3.77E-03 |
| LGALS4         | 3  | 0.19  | 0.09 | 2.70E-02 |
| LGALS7_LGALS7B | 6  | -0.22 | 0.11 | 4.70E-02 |
| LGALS8         | 6  | 0.03  | 0.09 | 7.15E-01 |
| LGALS9         | 3  | -1.67 | 0.32 | 1.65E-07 |
| LGMN           | 19 | -0.18 | 0.12 | 1.40E-01 |
| LHB            | 1  | -0.49 | 0.50 | 3.31E-01 |
| LIFR           | 10 | 0.26  | 0.10 | 1.40E-02 |
| LILRA2         | 11 | 0.00  | 0.07 | 9.66E-01 |
| LILRA5         | 9  | -0.12 | 0.18 | 5.10E-01 |
| LILRB1         | 7  | 0.12  | 0.07 | 1.13E-01 |
| LILRB2         | 9  | 0.05  | 0.05 | 2.97E-01 |
| LILRB4         | 2  | -2.18 | 0.51 | 2.12E-05 |
| LILRB5         | 2  | -0.02 | 0.04 | 5.49E-01 |

|           |    |       |      |          |
|-----------|----|-------|------|----------|
| LPCAT2    | 1  | -0.68 | 0.40 | 8.96E-02 |
| LPL       | 6  | 0.31  | 0.11 | 4.23E-03 |
| LPO       | 13 | -0.20 | 0.09 | 2.79E-02 |
| LRIG1     | 10 | -0.01 | 0.05 | 7.95E-01 |
| LRP1      | 10 | -0.56 | 0.17 | 1.07E-03 |
| LRP11     | 6  | 0.04  | 0.07 | 5.98E-01 |
| LRPAP1    | 7  | 0.05  | 0.06 | 4.22E-01 |
| LRRC25    | 12 | 0.07  | 0.09 | 4.09E-01 |
| LRRN1     | 6  | -0.02 | 0.06 | 7.42E-01 |
| LSP1      | 2  | -0.97 | 0.28 | 6.70E-04 |
| LTA       | 8  | -0.08 | 0.06 | 1.83E-01 |
| LTA4H     | 1  | 0.07  | 0.45 | 8.75E-01 |
| LTBP2     | 8  | 0.00  | 0.22 | 9.96E-01 |
| LTBP3     | 5  | -0.22 | 0.09 | 1.16E-02 |
| LTBR      | 13 | -0.24 | 0.10 | 1.40E-02 |
| LXN       | 1  | 0.42  | 0.26 | 1.10E-01 |
| LY6D      | 5  | -0.13 | 0.10 | 1.83E-01 |
| LY75      | 6  | 0.07  | 0.05 | 1.21E-01 |
| LY9       | 11 | -0.05 | 0.08 | 4.83E-01 |
| LY96      | 10 | -0.06 | 0.19 | 7.49E-01 |
| LYAR      | 1  | -1.39 | 0.84 | 9.86E-02 |
| LYN       | 5  | -0.50 | 0.34 | 1.45E-01 |
| LYPD3     | 17 | 0.05  | 0.08 | 5.03E-01 |
| LYPD8     | 7  | 0.11  | 0.08 | 1.60E-01 |
| MAD1L1    | 1  | -0.48 | 0.35 | 1.76E-01 |
| MAGED1    | 2  | -0.41 | 0.45 | 3.59E-01 |
| MANF      | 6  | -0.34 | 0.31 | 2.63E-01 |
| MANSC1    | 12 | -0.05 | 0.18 | 7.93E-01 |
| MAP2K6    | 2  | -0.27 | 0.51 | 6.04E-01 |
| MAP3K5    | 1  | -0.15 | 0.80 | 8.52E-01 |
| MAP4K5    | 3  | -0.08 | 0.23 | 7.48E-01 |
| MARCO     | 9  | -0.05 | 0.11 | 6.57E-01 |
| MASP1     | 10 | 0.20  | 0.11 | 6.67E-02 |
| MATN2     | 5  | 0.12  | 0.10 | 2.19E-01 |
| MATN3     | 3  | 0.01  | 0.08 | 9.23E-01 |
| MAVS      | 3  | -0.57 | 0.38 | 1.28E-01 |
| MAX       | 5  | -0.31 | 0.32 | 3.32E-01 |
| MB        | 8  | 0.16  | 0.28 | 5.75E-01 |
| MCAM      | 8  | 0.16  | 0.15 | 3.10E-01 |
| MCFD2     | 4  | -0.04 | 0.23 | 8.72E-01 |
| MDGA1     | 6  | 0.10  | 0.04 | 1.09E-02 |
| MDK       | 13 | -0.33 | 0.17 | 4.79E-02 |
| MED18     | 1  | 0.06  | 0.76 | 9.33E-01 |
| MEGF10    | 11 | 0.20  | 0.14 | 1.55E-01 |
| MEGF9     | 11 | 0.17  | 0.11 | 1.24E-01 |
| MEP1B     | 14 | 0.00  | 0.04 | 9.22E-01 |
| MEPE      | 11 | 0.01  | 0.18 | 9.64E-01 |
| MERTK     | 12 | -0.14 | 0.13 | 2.67E-01 |
| MESD      | 4  | -0.67 | 0.35 | 5.50E-02 |
| MET       | 17 | 0.14  | 0.11 | 2.08E-01 |
| METAP1D   | 3  | 0.68  | 0.42 | 1.04E-01 |
| METAP2    | 4  | -0.26 | 0.28 | 3.57E-01 |
| MFAP5     | 4  | 0.56  | 0.19 | 3.90E-03 |
| MFGE8     | 11 | -0.10 | 0.10 | 3.38E-01 |
| MGLL      | 3  | 0.20  | 0.39 | 6.00E-01 |
| MGMT      | 3  | 0.10  | 0.11 | 3.62E-01 |
| MIA       | 5  | 0.02  | 0.06 | 7.71E-01 |
| MICB_MICA | 8  | -0.05 | 0.05 | 2.33E-01 |
| MIF       | 3  | -0.09 | 0.32 | 7.86E-01 |
| MILR1     | 8  | 0.17  | 0.10 | 9.58E-02 |

|          |    |       |      |          |
|----------|----|-------|------|----------|
| MITD1    | 2  | -0.09 | 0.49 | 8.45E-01 |
| MLN      | 13 | 0.16  | 0.17 | 3.37E-01 |
| MME      | 13 | -0.15 | 0.08 | 5.22E-02 |
| MMP1     | 10 | -0.07 | 0.09 | 4.17E-01 |
| MMP10    | 2  | 0.11  | 0.13 | 4.01E-01 |
| MMP12    | 2  | -0.08 | 0.09 | 3.76E-01 |
| MMP13    | 1  | 0.30  | 0.32 | 3.35E-01 |
| MMP3     | 4  | 0.14  | 0.09 | 1.33E-01 |
| MMP7     | 5  | -0.06 | 0.14 | 6.89E-01 |
| MMP8     | 2  | -0.12 | 0.11 | 2.74E-01 |
| MMP9     | 9  | 0.10  | 0.15 | 5.03E-01 |
| MNDA     | 1  | -2.02 | 0.89 | 2.40E-02 |
| MOG      | 2  | -0.32 | 0.22 | 1.35E-01 |
| MPHOSPH8 | 2  | -0.47 | 0.48 | 3.34E-01 |
| MPI      | 4  | -0.03 | 0.19 | 8.80E-01 |
| MPIG6B   | 4  | -0.19 | 0.29 | 5.25E-01 |
| MPO      | 6  | -0.62 | 0.29 | 3.40E-02 |
| MSLN     | 7  | -0.07 | 0.07 | 3.23E-01 |
| MSMB     | 5  | 0.06  | 0.05 | 2.27E-01 |
| MSR1     | 11 | -0.04 | 0.10 | 7.02E-01 |
| MSRA     | 2  | 0.12  | 0.53 | 8.25E-01 |
| MSTN     | 6  | 0.48  | 0.31 | 1.22E-01 |
| MUC13    | 4  | 0.33  | 0.14 | 2.34E-02 |
| MUC16    | 1  | 1.09  | 0.65 | 9.56E-02 |
| MVK      | 1  | -0.85 | 0.52 | 1.02E-01 |
| MYOC     | 9  | 0.52  | 0.13 | 1.09E-04 |
| MZB1     | 7  | 0.01  | 0.22 | 9.69E-01 |
| MZT1     | 2  | -0.04 | 0.57 | 9.40E-01 |
| NAAA     | 15 | 0.03  | 0.06 | 6.08E-01 |
| NADK     | 5  | 0.03  | 0.14 | 8.20E-01 |
| NBL1     | 3  | -0.26 | 0.33 | 4.30E-01 |
| NBN      | 3  | 0.54  | 0.38 | 1.53E-01 |
| NCAM1    | 7  | -0.08 | 0.14 | 5.82E-01 |
| NCAM2    | 5  | 0.19  | 0.19 | 3.22E-01 |
| NCAN     | 9  | -0.19 | 0.18 | 2.89E-01 |
| NCF2     | 4  | 0.09  | 0.18 | 6.16E-01 |
| NCK2     | 1  | 0.80  | 0.88 | 3.67E-01 |
| NCR1     | 22 | -0.29 | 0.10 | 4.69E-03 |
| NCS1     | 7  | 0.06  | 0.25 | 8.07E-01 |
| NECTIN2  | 4  | 0.30  | 0.18 | 8.87E-02 |
| NECTIN4  | 6  | -0.10 | 0.14 | 4.85E-01 |
| NEFL     | 2  | -1.45 | 0.70 | 3.77E-02 |
| NELL1    | 16 | 0.02  | 0.09 | 8.27E-01 |
| NELL2    | 13 | 0.11  | 0.18 | 5.28E-01 |
| NFASC    | 4  | 0.00  | 0.11 | 1.00E+00 |
| NFATC1   | 2  | -0.01 | 0.36 | 9.77E-01 |
| NFATC3   | 1  | 1.94  | 0.76 | 1.03E-02 |
| NFKBIE   | 2  | -0.03 | 0.20 | 8.89E-01 |
| NID1     | 9  | -0.12 | 0.15 | 4.35E-01 |
| NID2     | 12 | 0.06  | 0.07 | 3.62E-01 |
| NINJ1    | 1  | 0.05  | 0.63 | 9.38E-01 |
| NME3     | 12 | 0.12  | 0.11 | 2.46E-01 |
| NMNAT1   | 4  | -0.02 | 0.16 | 8.79E-01 |
| NOMO1    | 3  | -0.22 | 0.30 | 4.65E-01 |
| NOS1     | 1  | -0.35 | 0.71 | 6.23E-01 |
| NOS3     | 2  | -0.28 | 0.52 | 5.96E-01 |
| NOTCH1   | 7  | -0.08 | 0.14 | 5.74E-01 |
| NOTCH3   | 11 | 0.35  | 0.19 | 6.35E-02 |
| NPDC1    | 5  | -0.63 | 0.35 | 7.46E-02 |
| NPPB     | 2  | 0.64  | 0.23 | 6.26E-03 |

|          |    |       |      |          |
|----------|----|-------|------|----------|
| NPPC     | 2  | 2.24  | 0.66 | 7.24E-04 |
| NPTX1    | 12 | 0.17  | 0.08 | 2.87E-02 |
| NPTXR    | 3  | 0.01  | 0.08 | 8.66E-01 |
| NPY      | 9  | -0.21 | 0.18 | 2.55E-01 |
| NRCAM    | 7  | -0.04 | 0.22 | 8.63E-01 |
| NRP1     | 6  | 0.21  | 0.13 | 1.10E-01 |
| NRP2     | 9  | 0.01  | 0.19 | 9.45E-01 |
| NRTN     | 1  | 0.73  | 0.81 | 3.63E-01 |
| NSFL1C   | 2  | -0.06 | 0.43 | 8.85E-01 |
| NT5C3A   | 4  | -0.19 | 0.31 | 5.35E-01 |
| NT5E     | 8  | -0.07 | 0.08 | 3.30E-01 |
| NTF3     | 4  | 0.05  | 0.21 | 8.19E-01 |
| NTF4     | 1  | -2.67 | 0.85 | 1.76E-03 |
| NTproBNP | 4  | 0.42  | 0.16 | 7.48E-03 |
| NTRK2    | 7  | 0.20  | 0.25 | 4.22E-01 |
| NTRK3    | 9  | 0.38  | 0.16 | 1.55E-02 |
| NUB1     | 4  | 0.00  | 0.21 | 9.96E-01 |
| NUCB2    | 5  | -0.10 | 0.11 | 3.37E-01 |
| NUDC     | 2  | -0.37 | 0.44 | 4.01E-01 |
| NUDT2    | 2  | -0.13 | 0.18 | 4.73E-01 |
| NUDT5    | 2  | 0.33  | 0.50 | 5.13E-01 |
| OBP2B    | 11 | 0.02  | 0.08 | 8.30E-01 |
| ODAM     | 2  | -0.05 | 0.17 | 7.81E-01 |
| OGFR     | 2  | -0.33 | 0.33 | 3.17E-01 |
| OGN      | 4  | 0.14  | 0.08 | 6.50E-02 |
| OLR1     | 6  | -0.04 | 0.24 | 8.49E-01 |
| OMD      | 5  | -0.06 | 0.23 | 7.93E-01 |
| OMG      | 8  | 0.50  | 0.20 | 1.42E-02 |
| OPTC     | 7  | -0.04 | 0.15 | 8.10E-01 |
| OSCAR    | 8  | -0.03 | 0.08 | 7.23E-01 |
| OSM      | 8  | -0.38 | 0.16 | 2.08E-02 |
| OSMR     | 5  | 0.02  | 0.08 | 8.44E-01 |
| OXT      | 9  | -0.10 | 0.08 | 2.19E-01 |
| P4HB     | 3  | -0.15 | 0.42 | 7.30E-01 |
| PADI2    | 1  | -0.55 | 0.36 | 1.27E-01 |
| PADI4    | 1  | 0.13  | 0.17 | 4.59E-01 |
| PAEP     | 3  | -0.05 | 0.06 | 4.12E-01 |
| PAG1     | 6  | -1.17 | 0.26 | 5.81E-06 |
| PAK4     | 1  | -0.16 | 0.86 | 8.52E-01 |
| PAM      | 4  | 0.13  | 0.09 | 1.35E-01 |
| PAMR1    | 4  | 0.16  | 0.11 | 1.65E-01 |
| PAPPA    | 11 | 0.04  | 0.15 | 7.65E-01 |
| PARK7    | 5  | -0.07 | 0.23 | 7.72E-01 |
| PARP1    | 2  | 0.21  | 0.26 | 4.28E-01 |
| PCDH1    | 5  | -0.09 | 0.25 | 7.32E-01 |
| PCDH17   | 8  | -0.25 | 0.09 | 4.77E-03 |
| PCOLCE   | 1  | -0.01 | 0.26 | 9.69E-01 |
| PCSK9    | 8  | -0.63 | 0.13 | 6.42E-07 |
| PDCD1    | 10 | -0.11 | 0.22 | 6.04E-01 |
| PDCD1LG2 | 8  | -0.10 | 0.06 | 7.41E-02 |
| PDCD5    | 2  | -0.23 | 0.12 | 6.06E-02 |
| PDCD6    | 4  | 0.01  | 0.04 | 8.46E-01 |
| PDGFA    | 16 | -0.15 | 0.13 | 2.27E-01 |
| PDGFB    | 13 | 0.01  | 0.15 | 9.24E-01 |
| PDGFC    | 4  | -0.14 | 0.15 | 3.46E-01 |
| PDGFRA   | 10 | 0.16  | 0.13 | 2.26E-01 |
| PDGFRB   | 2  | 0.01  | 0.04 | 8.40E-01 |
| PDLIM7   | 3  | -0.65 | 0.40 | 1.07E-01 |
| PEAR1    | 7  | -0.38 | 0.16 | 1.65E-02 |
| PEBP1    | 2  | -0.30 | 0.57 | 5.99E-01 |

|          |    |       |      |          |
|----------|----|-------|------|----------|
| PECAM1   | 7  | 0.06  | 0.09 | 4.78E-01 |
| PFKFB2   | 4  | -0.48 | 0.21 | 2.07E-02 |
| PGF      | 3  | -0.46 | 0.41 | 2.63E-01 |
| PGLYRP1  | 11 | -0.28 | 0.13 | 2.44E-02 |
| PI3      | 4  | 0.02  | 0.15 | 8.93E-01 |
| PIGR     | 6  | 0.08  | 0.20 | 7.00E-01 |
| PIK3AP1  | 6  | -0.01 | 0.19 | 9.72E-01 |
| PIK3IP1  | 3  | 0.29  | 0.15 | 5.13E-02 |
| PILRA    | 6  | 0.05  | 0.05 | 2.70E-01 |
| PILRB    | 4  | 0.06  | 0.04 | 1.68E-01 |
| PKLR     | 4  | 0.03  | 0.21 | 9.02E-01 |
| PLA2G10  | 13 | 0.40  | 0.10 | 2.87E-05 |
| PLA2G15  | 8  | 0.27  | 0.12 | 2.33E-02 |
| PLA2G1B  | 17 | -0.05 | 0.14 | 7.16E-01 |
| PLA2G2A  | 6  | -0.02 | 0.07 | 7.74E-01 |
| PLA2G4A  | 2  | 0.27  | 0.54 | 6.20E-01 |
| PLA2G7   | 9  | -1.41 | 0.21 | 3.69E-11 |
| PLAT     | 4  | -0.85 | 0.33 | 1.08E-02 |
| PLAU     | 8  | -0.06 | 0.12 | 6.27E-01 |
| PLAUR    | 9  | -0.31 | 0.16 | 5.37E-02 |
| PLIN1    | 1  | -0.86 | 0.53 | 1.07E-01 |
| PLIN3    | 2  | -0.72 | 0.50 | 1.55E-01 |
| PLPBP    | 2  | -0.16 | 0.50 | 7.46E-01 |
| PLTP     | 11 | 0.03  | 0.09 | 7.39E-01 |
| PLXDC1   | 3  | -0.03 | 0.18 | 8.49E-01 |
| PLXNA4   | 5  | -0.40 | 0.24 | 1.01E-01 |
| PLXNB2   | 11 | -0.01 | 0.06 | 9.25E-01 |
| PLXNB3   | 5  | -0.04 | 0.35 | 8.98E-01 |
| PM20D1   | 6  | 0.39  | 0.27 | 1.46E-01 |
| PMVK     | 6  | 0.05  | 0.26 | 8.43E-01 |
| PNLIPRP2 | 7  | -0.12 | 0.04 | 1.85E-03 |
| PNPT1    | 2  | 0.09  | 0.48 | 8.56E-01 |
| PODXL    | 6  | 0.18  | 0.08 | 2.08E-02 |
| PODXL2   | 11 | -0.30 | 0.18 | 9.31E-02 |
| POLR2F   | 1  | -5.94 | 0.85 | 3.11E-12 |
| PON2     | 3  | -0.02 | 0.06 | 7.25E-01 |
| PON3     | 9  | 0.03  | 0.11 | 7.64E-01 |
| PPCDC    | 2  | 0.16  | 0.13 | 2.24E-01 |
| PPIB     | 3  | -0.18 | 0.43 | 6.85E-01 |
| PPME1    | 1  | 0.28  | 0.84 | 7.41E-01 |
| PPP1R12A | 3  | -1.01 | 0.44 | 2.27E-02 |
| PPP1R2   | 3  | -0.07 | 0.41 | 8.73E-01 |
| PPP1R9B  | 2  | -0.43 | 0.53 | 4.17E-01 |
| PPP3R1   | 4  | 0.34  | 0.30 | 2.63E-01 |
| PPY      | 6  | 0.28  | 0.19 | 1.37E-01 |
| PRCP     | 12 | -0.02 | 0.12 | 8.76E-01 |
| PRDX1    | 2  | -0.04 | 0.48 | 9.41E-01 |
| PRDX3    | 1  | -1.01 | 0.70 | 1.49E-01 |
| PRDX5    | 2  | 0.14  | 0.29 | 6.30E-01 |
| PRDX6    | 1  | 0.31  | 0.32 | 3.40E-01 |
| PRELP    | 1  | -0.06 | 0.10 | 5.48E-01 |
| PRKAB1   | 1  | -0.16 | 0.84 | 8.52E-01 |
| PRKAR1A  | 4  | -0.11 | 0.35 | 7.50E-01 |
| PRKRA    | 1  | -0.08 | 0.44 | 8.52E-01 |
| PRL      | 3  | 0.48  | 0.41 | 2.41E-01 |
| PROC     | 7  | -0.18 | 0.16 | 2.67E-01 |
| PROK1    | 2  | 0.12  | 0.12 | 3.49E-01 |
| PRSS2    | 11 | -0.08 | 0.16 | 6.25E-01 |
| PRSS27   | 16 | -0.10 | 0.06 | 1.14E-01 |
| PRSS8    | 7  | -0.02 | 0.22 | 9.20E-01 |

|          |    |       |      |          |
|----------|----|-------|------|----------|
| PRTFDC1  | 3  | 0.05  | 0.21 | 8.06E-01 |
| PRTG     | 8  | 0.01  | 0.09 | 8.74E-01 |
| PRTN3    | 12 | -0.27 | 0.19 | 1.56E-01 |
| PSG1     | 6  | 0.11  | 0.28 | 7.00E-01 |
| PSIP1    | 2  | -0.17 | 0.33 | 5.99E-01 |
| PSME1    | 2  | -0.26 | 0.45 | 5.64E-01 |
| PSME2    | 1  | -0.28 | 0.49 | 5.70E-01 |
| PSMG3    | 1  | -0.19 | 0.88 | 8.27E-01 |
| PSPN     | 7  | -1.03 | 0.33 | 2.11E-03 |
| PSRC1    | 2  | 0.14  | 0.25 | 5.61E-01 |
| PTGDS    | 2  | -0.21 | 0.61 | 7.31E-01 |
| PTH1R    | 1  | -0.01 | 0.19 | 9.41E-01 |
| PTN      | 3  | 0.19  | 0.26 | 4.59E-01 |
| PTPN1    | 2  | -0.31 | 0.45 | 4.89E-01 |
| PTPN6    | 2  | -0.47 | 0.47 | 3.27E-01 |
| PTPRF    | 12 | 0.47  | 0.15 | 1.97E-03 |
| PTPRM    | 8  | 0.13  | 0.08 | 8.44E-02 |
| PTPRN2   | 1  | 0.10  | 0.29 | 7.29E-01 |
| PTPRS    | 5  | 0.16  | 0.15 | 2.70E-01 |
| PTS      | 4  | 0.09  | 0.19 | 6.44E-01 |
| PTX3     | 5  | -0.02 | 0.12 | 8.81E-01 |
| PVALB    | 6  | -0.03 | 0.06 | 5.55E-01 |
| PVR      | 2  | -0.07 | 0.06 | 2.80E-01 |
| PXN      | 3  | 0.01  | 0.07 | 8.99E-01 |
| QDPR     | 1  | -0.14 | 0.73 | 8.52E-01 |
| QPCT     | 11 | 0.28  | 0.12 | 1.82E-02 |
| RABEPK   | 1  | 0.03  | 0.30 | 9.09E-01 |
| RABGAP1L | 2  | 0.01  | 0.47 | 9.82E-01 |
| RAD23B   | 3  | -0.10 | 0.44 | 8.27E-01 |
| RARRES1  | 1  | -0.05 | 0.10 | 6.07E-01 |
| RARRES2  | 3  | 0.34  | 0.21 | 1.07E-01 |
| RASSF2   | 1  | 0.33  | 0.47 | 4.82E-01 |
| RBKS     | 1  | 0.10  | 0.12 | 4.33E-01 |
| RBP2     | 4  | 0.20  | 0.31 | 5.13E-01 |
| RBP5     | 3  | -0.11 | 0.14 | 4.35E-01 |
| RCOR1    | 1  | -1.91 | 0.75 | 1.11E-02 |
| REG1A    | 6  | 0.09  | 0.11 | 4.10E-01 |
| REG1B    | 7  | 0.04  | 0.10 | 7.04E-01 |
| REG3A    | 8  | -0.05 | 0.14 | 7.33E-01 |
| REG4     | 2  | 0.13  | 0.25 | 6.02E-01 |
| RELT     | 4  | 0.18  | 0.13 | 1.73E-01 |
| REN      | 2  | -0.07 | 0.28 | 8.18E-01 |
| RET      | 8  | -0.21 | 0.11 | 4.64E-02 |
| RETN     | 15 | 0.00  | 0.12 | 9.72E-01 |
| RGMA     | 17 | 0.05  | 0.10 | 6.01E-01 |
| RGMB     | 4  | -0.25 | 0.22 | 2.63E-01 |
| RGS8     | 1  | 0.31  | 0.26 | 2.32E-01 |
| RHOC     | 3  | -0.47 | 0.52 | 3.66E-01 |
| RILP     | 3  | -0.21 | 0.39 | 5.92E-01 |
| RNASE3   | 4  | 0.01  | 0.16 | 9.60E-01 |
| RNASET2  | 7  | -0.05 | 0.10 | 6.25E-01 |
| ROBO1    | 8  | 0.03  | 0.16 | 8.54E-01 |
| ROBO2    | 5  | 0.35  | 0.27 | 1.95E-01 |
| ROR1     | 12 | 0.18  | 0.12 | 1.38E-01 |
| RP2      | 2  | -3.85 | 0.39 | 2.29E-23 |
| RRM2     | 1  | 0.42  | 0.74 | 5.75E-01 |
| RRM2B    | 1  | -0.09 | 0.49 | 8.52E-01 |
| RSPO1    | 8  | -0.16 | 0.15 | 2.88E-01 |
| RSPO3    | 8  | -0.14 | 0.20 | 4.70E-01 |
| RTBDN    | 2  | 0.09  | 0.27 | 7.34E-01 |

|           |    |       |      |          |
|-----------|----|-------|------|----------|
| RTN4R     | 9  | -0.02 | 0.14 | 9.01E-01 |
| RUVBL1    | 1  | -0.33 | 0.20 | 8.98E-02 |
| RWDD1     | 2  | -0.03 | 0.30 | 9.23E-01 |
| S100A11   | 2  | 0.07  | 0.19 | 7.29E-01 |
| S100A12   | 4  | 0.19  | 0.17 | 2.50E-01 |
| S100A16   | 3  | 0.61  | 0.31 | 4.63E-02 |
| S100A4    | 4  | -0.67 | 0.41 | 1.06E-01 |
| S100P     | 5  | 1.13  | 0.28 | 4.99E-05 |
| SAMD9L    | 2  | -0.06 | 0.15 | 7.04E-01 |
| SCAMP3    | 4  | 0.08  | 0.32 | 8.03E-01 |
| SCARA5    | 6  | -0.09 | 0.14 | 5.27E-01 |
| SCARB1    | 1  | -0.75 | 0.83 | 3.69E-01 |
| SCARB2    | 4  | -0.38 | 0.18 | 3.43E-02 |
| SCARF1    | 7  | -0.12 | 0.11 | 2.57E-01 |
| SCARF2    | 8  | 0.15  | 0.13 | 2.52E-01 |
| SCG2      | 4  | -0.83 | 0.36 | 2.09E-02 |
| SCG3      | 5  | -0.10 | 0.07 | 1.70E-01 |
| SCGB1A1   | 15 | -0.10 | 0.11 | 3.76E-01 |
| SCGB3A2   | 15 | 0.30  | 0.13 | 2.17E-02 |
| SCGN      | 3  | 0.70  | 0.23 | 2.51E-03 |
| SCLY      | 6  | 0.14  | 0.34 | 6.88E-01 |
| SCP2      | 1  | 0.03  | 0.84 | 9.68E-01 |
| SCRN1     | 2  | -0.06 | 0.32 | 8.56E-01 |
| SDC1      | 13 | 0.19  | 0.14 | 1.74E-01 |
| SDC4      | 20 | 0.02  | 0.11 | 8.49E-01 |
| SELE      | 9  | 0.05  | 0.06 | 3.32E-01 |
| SELP      | 10 | 0.04  | 0.12 | 7.32E-01 |
| SELPLG    | 10 | -0.17 | 0.08 | 3.14E-02 |
| SEMA3F    | 5  | -0.25 | 0.31 | 4.27E-01 |
| SEMA4C    | 5  | 0.41  | 0.19 | 2.86E-02 |
| SEMA4D    | 6  | 0.11  | 0.26 | 6.67E-01 |
| SEMA7A    | 17 | -0.28 | 0.12 | 2.32E-02 |
| SEPTIN9   | 2  | 0.92  | 0.41 | 2.56E-02 |
| SERPINA11 | 8  | 0.07  | 0.07 | 3.03E-01 |
| SERPINA12 | 5  | -0.12 | 0.07 | 7.32E-02 |
| SERPINA9  | 3  | -0.13 | 0.10 | 1.88E-01 |
| SERPINB1  | 3  | -0.73 | 0.36 | 4.37E-02 |
| SERPINB6  | 1  | -0.22 | 0.78 | 7.80E-01 |
| SERPINB8  | 2  | 0.05  | 0.06 | 3.88E-01 |
| SERPINB9  | 2  | 0.56  | 0.34 | 1.05E-01 |
| SERPINE1  | 14 | -0.07 | 0.14 | 6.06E-01 |
| SESTD1    | 3  | -0.15 | 0.35 | 6.73E-01 |
| SETMAR    | 2  | -0.43 | 0.20 | 2.81E-02 |
| SEZ6L     | 7  | -0.34 | 0.21 | 9.70E-02 |
| SEZ6L2    | 8  | 0.44  | 0.18 | 1.33E-02 |
| SF3B4     | 4  | 0.50  | 0.36 | 1.70E-01 |
| SFRP1     | 5  | -0.16 | 0.20 | 4.11E-01 |
| SFTPA1    | 1  | -0.10 | 0.20 | 6.01E-01 |
| SFTPA2    | 6  | -0.01 | 0.07 | 8.63E-01 |
| SFTPD     | 10 | 0.03  | 0.05 | 5.71E-01 |
| SH2B3     | 4  | -0.57 | 0.35 | 1.04E-01 |
| SH2D1A    | 2  | -1.46 | 0.38 | 1.08E-04 |
| SHMT1     | 4  | -0.07 | 0.06 | 2.77E-01 |
| SIAE      | 8  | 0.12  | 0.16 | 4.64E-01 |
| SIGLEC1   | 9  | -0.01 | 0.15 | 9.55E-01 |
| SIGLEC10  | 7  | -0.09 | 0.10 | 3.37E-01 |
| SIGLEC5   | 3  | -0.06 | 0.06 | 2.54E-01 |
| SIGLEC6   | 21 | -0.11 | 0.09 | 2.04E-01 |
| SIGLEC7   | 7  | 0.10  | 0.12 | 4.04E-01 |
| SIGLEC9   | 10 | -0.04 | 0.05 | 4.13E-01 |

|          |    |       |      |          |
|----------|----|-------|------|----------|
| SIRPA    | 7  | 0.09  | 0.04 | 1.39E-02 |
| SIRPB1   | 11 | -0.02 | 0.07 | 7.60E-01 |
| SIRT2    | 3  | -0.56 | 0.27 | 3.57E-02 |
| SIT1     | 6  | -1.01 | 0.24 | 3.24E-05 |
| SKAP1    | 7  | -0.65 | 0.26 | 1.19E-02 |
| SKAP2    | 3  | -0.79 | 0.42 | 5.87E-02 |
| SLAMF1   | 3  | 0.51  | 0.27 | 5.72E-02 |
| SLAMF6   | 3  | -0.41 | 0.22 | 6.74E-02 |
| SLAMF7   | 7  | 0.05  | 0.06 | 4.63E-01 |
| SLAMF8   | 5  | 0.03  | 0.05 | 4.85E-01 |
| SLC16A1  | 4  | 0.25  | 0.27 | 3.51E-01 |
| SLC27A4  | 2  | -0.19 | 0.41 | 6.48E-01 |
| SLC39A14 | 2  | -0.60 | 0.34 | 7.41E-02 |
| SLC39A5  | 7  | 0.04  | 0.21 | 8.67E-01 |
| SLIT2    | 1  | -0.77 | 0.73 | 2.95E-01 |
| SLITRK2  | 11 | 0.08  | 0.18 | 6.80E-01 |
| SLITRK6  | 7  | 0.03  | 0.11 | 7.56E-01 |
| SMAD1    | 5  | -0.72 | 0.34 | 3.77E-02 |
| SMAD5    | 1  | 0.11  | 0.26 | 6.75E-01 |
| SMOC1    | 8  | -0.18 | 0.13 | 1.79E-01 |
| SMOC2    | 5  | -0.21 | 0.12 | 7.41E-02 |
| SMPD1    | 14 | 0.16  | 0.08 | 5.22E-02 |
| SMPDL3A  | 19 | 0.03  | 0.05 | 5.54E-01 |
| SNAP23   | 2  | -0.10 | 0.36 | 7.73E-01 |
| SNAP29   | 5  | -0.50 | 0.29 | 8.97E-02 |
| SNCG     | 1  | -0.02 | 0.05 | 6.85E-01 |
| SNX9     | 2  | -0.50 | 0.41 | 2.14E-01 |
| SOD1     | 3  | -0.05 | 0.35 | 8.84E-01 |
| SOD2     | 8  | 0.23  | 0.20 | 2.54E-01 |
| SORCS2   | 3  | 0.16  | 0.10 | 1.01E-01 |
| SORD     | 3  | 0.76  | 0.28 | 6.58E-03 |
| SORT1    | 12 | -0.26 | 0.13 | 5.30E-02 |
| SOST     | 12 | -0.03 | 0.15 | 8.41E-01 |
| SPARC    | 12 | -0.05 | 0.16 | 7.55E-01 |
| SPARCL1  | 4  | 0.03  | 0.06 | 6.35E-01 |
| SPINK1   | 2  | 0.16  | 0.11 | 1.50E-01 |
| SPINK4   | 5  | 0.04  | 0.05 | 4.75E-01 |
| SPINK5   | 6  | -0.23 | 0.17 | 1.75E-01 |
| SPINK6   | 1  | -0.08 | 0.12 | 5.23E-01 |
| SPINT1   | 8  | 0.40  | 0.12 | 6.35E-04 |
| SPINT2   | 11 | -0.09 | 0.15 | 5.41E-01 |
| SPOCK1   | 11 | 0.12  | 0.19 | 5.28E-01 |
| SPON1    | 5  | 0.07  | 0.14 | 6.25E-01 |
| SPON2    | 1  | -0.15 | 0.21 | 4.94E-01 |
| SPP1     | 7  | -0.39 | 0.27 | 1.50E-01 |
| SPRY2    | 6  | -0.14 | 0.24 | 5.43E-01 |
| SRC      | 1  | -2.49 | 0.82 | 2.33E-03 |
| SRP14    | 2  | -1.12 | 0.37 | 2.64E-03 |
| SRPK2    | 3  | -0.35 | 0.33 | 2.94E-01 |
| SSC4D    | 11 | -0.22 | 0.11 | 3.81E-02 |
| SSC5D    | 10 | -0.36 | 0.16 | 2.36E-02 |
| ST3GAL1  | 7  | -0.19 | 0.14 | 1.70E-01 |
| ST6GAL1  | 5  | -0.69 | 0.36 | 5.70E-02 |
| STAMBP   | 3  | 0.09  | 0.44 | 8.43E-01 |
| STAT5B   | 3  | -0.39 | 0.43 | 3.62E-01 |
| STC1     | 5  | 0.96  | 0.25 | 1.45E-04 |
| STC2     | 4  | -1.49 | 0.40 | 1.83E-04 |
| STIP1    | 2  | -0.04 | 0.45 | 9.36E-01 |
| STK11    | 4  | -0.27 | 0.36 | 4.44E-01 |
| STK24    | 2  | -0.19 | 0.59 | 7.42E-01 |



|          |    |       |      |          |
|----------|----|-------|------|----------|
| STK4     | 4  | -0.68 | 0.35 | 5.42E-02 |
| STX16    | 1  | -0.30 | 0.77 | 7.01E-01 |
| STX4     | 2  | 0.92  | 0.54 | 8.69E-02 |
| STX6     | 1  | -0.88 | 0.86 | 3.06E-01 |
| STX8     | 3  | -0.20 | 0.38 | 5.99E-01 |
| SUGT1    | 1  | -0.13 | 0.69 | 8.52E-01 |
| SULT1A1  | 1  | -0.17 | 0.45 | 7.12E-01 |
| SULT2A1  | 3  | -0.05 | 0.15 | 7.19E-01 |
| SUMF2    | 14 | -0.12 | 0.09 | 1.83E-01 |
| SUSD1    | 4  | 0.20  | 0.21 | 3.45E-01 |
| SUSD2    | 3  | 0.04  | 0.10 | 6.42E-01 |
| TACC3    | 4  | 0.05  | 0.32 | 8.68E-01 |
| TACSTD2  | 13 | -0.12 | 0.06 | 3.12E-02 |
| TAFA5    | 2  | -0.06 | 0.26 | 8.13E-01 |
| TARBP2   | 3  | -0.48 | 0.42 | 2.55E-01 |
| TBC1D17  | 1  | 0.13  | 0.11 | 2.25E-01 |
| TBC1D23  | 4  | -0.29 | 0.25 | 2.36E-01 |
| TBC1D5   | 2  | 0.82  | 0.54 | 1.29E-01 |
| TBCB     | 4  | -0.42 | 0.38 | 2.60E-01 |
| TBCC     | 4  | -0.14 | 0.26 | 6.00E-01 |
| TBL1X    | 5  | -0.19 | 0.25 | 4.41E-01 |
| TCL1A    | 17 | -0.33 | 0.11 | 3.16E-03 |
| TCN2     | 1  | 0.18  | 0.09 | 3.48E-02 |
| TDGF1    | 2  | 0.02  | 0.04 | 6.24E-01 |
| TDRKH    | 4  | -0.04 | 0.13 | 7.64E-01 |
| TEK      | 9  | 0.02  | 0.07 | 8.02E-01 |
| TFF1     | 5  | -0.03 | 0.13 | 8.38E-01 |
| TFF2     | 8  | 0.40  | 0.18 | 2.37E-02 |
| TFF3     | 3  | 0.11  | 0.12 | 3.64E-01 |
| TFPI     | 8  | 0.21  | 0.11 | 6.05E-02 |
| TFPI2    | 7  | 0.04  | 0.19 | 8.54E-01 |
| TFRC     | 9  | 0.24  | 0.15 | 1.09E-01 |
| TGFA     | 4  | -0.75 | 0.26 | 4.27E-03 |
| TGFB1    | 7  | -0.42 | 0.15 | 5.09E-03 |
| TGFBI    | 8  | 0.02  | 0.07 | 7.78E-01 |
| TGFBR2   | 7  | -0.08 | 0.22 | 7.31E-01 |
| TGFBR3   | 5  | -0.12 | 0.21 | 5.67E-01 |
| TGM2     | 2  | 0.11  | 0.25 | 6.55E-01 |
| THBD     | 14 | -0.40 | 0.14 | 5.05E-03 |
| THBS2    | 7  | 0.22  | 0.09 | 1.91E-02 |
| THBS4    | 5  | 0.24  | 0.13 | 5.99E-02 |
| THOP1    | 1  | 0.23  | 0.18 | 1.98E-01 |
| THPO     | 14 | -0.28 | 0.15 | 5.84E-02 |
| THY1     | 3  | 0.11  | 0.13 | 4.27E-01 |
| TIA1     | 2  | -0.76 | 0.44 | 8.58E-02 |
| TIE1     | 11 | -0.16 | 0.08 | 4.76E-02 |
| TIGAR    | 2  | 0.63  | 0.53 | 2.34E-01 |
| TIMD4    | 22 | -0.03 | 0.09 | 7.36E-01 |
| TIMP1    | 5  | -0.40 | 0.24 | 9.33E-02 |
| TIMP3    | 13 | 0.00  | 0.07 | 9.44E-01 |
| TIMP4    | 3  | 0.30  | 0.13 | 1.71E-02 |
| TINAGL1  | 8  | -0.69 | 0.20 | 5.38E-04 |
| TJAP1    | 1  | -0.13 | 0.70 | 8.52E-01 |
| TLR3     | 5  | 0.28  | 0.45 | 5.42E-01 |
| TMPRSS15 | 6  | 0.12  | 0.14 | 4.10E-01 |
| TMPRSS5  | 16 | -0.11 | 0.06 | 5.38E-02 |
| TMSB10   | 6  | -0.54 | 0.27 | 4.47E-02 |
| TNC      | 13 | 0.22  | 0.09 | 1.55E-02 |
| TNF      | 3  | -0.95 | 0.24 | 5.04E-05 |
| TNFAIP8  | 1  | 0.38  | 0.56 | 4.95E-01 |

|           |    |       |      |          |
|-----------|----|-------|------|----------|
| TNFRSF10A | 2  | -0.31 | 0.09 | 9.99E-04 |
| TNFRSF10B | 2  | -0.13 | 0.13 | 3.07E-01 |
| TNFRSF10C | 15 | 0.08  | 0.05 | 1.26E-01 |
| TNFRSF11A | 5  | 0.08  | 0.09 | 3.77E-01 |
| TNFRSF11B | 8  | 0.02  | 0.18 | 8.92E-01 |
| TNFRSF12A | 2  | -1.06 | 0.51 | 3.84E-02 |
| TNFRSF13B | 9  | 0.13  | 0.21 | 5.56E-01 |
| TNFRSF13C | 9  | -0.39 | 0.22 | 7.89E-02 |
| TNFRSF14  | 5  | -0.66 | 0.28 | 1.87E-02 |
| TNFRSF19  | 4  | 0.22  | 0.16 | 1.72E-01 |
| TNFRSF1A  | 7  | -0.31 | 0.24 | 2.03E-01 |
| TNFRSF1B  | 6  | -1.00 | 0.20 | 6.51E-07 |
| TNFRSF21  | 12 | -0.10 | 0.12 | 4.08E-01 |
| TNFRSF4   | 6  | -0.83 | 0.22 | 1.69E-04 |
| TNFRSF6B  | 3  | 0.06  | 0.14 | 6.58E-01 |
| TNFRSF8   | 7  | -0.58 | 0.16 | 2.85E-04 |
| TNFRSF9   | 5  | -0.33 | 0.21 | 1.17E-01 |
| TNFSF10   | 9  | -0.04 | 0.09 | 6.82E-01 |
| TNFSF11   | 7  | 0.07  | 0.14 | 6.16E-01 |
| TNFSF12   | 16 | -0.05 | 0.10 | 6.04E-01 |
| TNFSF13   | 7  | -0.43 | 0.12 | 5.03E-04 |
| TNFSF13B  | 4  | -0.15 | 0.27 | 5.74E-01 |
| TNFSF14   | 5  | -0.09 | 0.15 | 5.54E-01 |
| TNR       | 16 | 0.12  | 0.09 | 1.50E-01 |
| TNXB      | 6  | 0.13  | 0.10 | 1.82E-01 |
| TP53      | 1  | -0.78 | 0.75 | 2.97E-01 |
| TP53INP1  | 2  | 0.20  | 0.38 | 6.04E-01 |
| TPMT      | 2  | 0.02  | 0.09 | 8.01E-01 |
| TPP1      | 11 | -0.20 | 0.12 | 9.60E-02 |
| TPPP3     | 1  | -0.49 | 0.71 | 4.92E-01 |
| TPSAB1    | 13 | -0.08 | 0.05 | 1.36E-01 |
| TRAF2     | 3  | 0.31  | 0.44 | 4.85E-01 |
| TREM2     | 7  | -0.13 | 0.09 | 1.42E-01 |
| TREML2    | 7  | -0.10 | 0.15 | 5.00E-01 |
| TRIAP1    | 6  | -0.09 | 0.21 | 6.78E-01 |
| TRIM21    | 3  | 0.78  | 0.32 | 1.57E-02 |
| TRIM5     | 1  | 0.12  | 0.15 | 4.32E-01 |
| TSHB      | 14 | 0.04  | 0.15 | 7.89E-01 |
| TSPAN1    | 2  | -0.18 | 0.58 | 7.62E-01 |
| TST       | 1  | -0.20 | 0.45 | 6.47E-01 |
| TXLNA     | 3  | -0.25 | 0.34 | 4.68E-01 |
| TXNDC15   | 10 | -0.08 | 0.05 | 1.35E-01 |
| TXNDC5    | 4  | 0.29  | 0.30 | 3.35E-01 |
| TXNRD1    | 4  | -0.28 | 0.38 | 4.53E-01 |
| TYMP      | 2  | -0.65 | 0.23 | 4.39E-03 |
| TYRO3     | 8  | -0.06 | 0.07 | 3.84E-01 |
| UBAC1     | 1  | -0.57 | 0.61 | 3.52E-01 |
| ULBP2     | 6  | -0.55 | 0.21 | 7.34E-03 |
| UMOD      | 15 | -0.09 | 0.06 | 1.08E-01 |
| USO1      | 3  | -0.37 | 0.42 | 3.87E-01 |
| USP8      | 3  | -0.45 | 0.39 | 2.39E-01 |
| UXS1      | 2  | 0.01  | 0.23 | 9.68E-01 |
| VAMP5     | 1  | -1.66 | 0.74 | 2.49E-02 |
| VASH1     | 4  | -0.33 | 0.27 | 2.30E-01 |
| VASN      | 5  | -0.15 | 0.10 | 1.39E-01 |
| VAT1      | 9  | 0.37  | 0.18 | 3.66E-02 |
| VCAM1     | 10 | -0.74 | 0.16 | 3.46E-06 |
| VCAN      | 13 | 0.02  | 0.06 | 7.97E-01 |
| VEGFA     | 13 | 0.11  | 0.06 | 4.41E-02 |
| VEGFC     | 14 | -0.02 | 0.17 | 9.15E-01 |

|         |    |       |      |          |
|---------|----|-------|------|----------|
| VEGFD   | 2  | 0.05  | 0.45 | 9.11E-01 |
| VMO1    | 6  | 0.01  | 0.06 | 8.68E-01 |
| VNN2    | 10 | 0.06  | 0.06 | 3.55E-01 |
| VPS37A  | 2  | -1.18 | 0.59 | 4.64E-02 |
| VPS53   | 2  | -0.47 | 0.57 | 4.02E-01 |
| VSIG4   | 8  | 0.46  | 0.26 | 7.45E-02 |
| VSIR    | 8  | -0.01 | 0.12 | 9.05E-01 |
| VSTM1   | 2  | -0.05 | 0.06 | 4.13E-01 |
| VSTM2L  | 2  | -1.07 | 0.21 | 4.00E-07 |
| VTA1    | 3  | -0.84 | 0.40 | 3.73E-02 |
| VTCN1   | 2  | -1.14 | 0.40 | 4.10E-03 |
| VWA1    | 5  | 0.50  | 0.30 | 9.83E-02 |
| VWC2    | 3  | -0.11 | 0.09 | 2.44E-01 |
| VWF     | 6  | -0.12 | 0.13 | 3.55E-01 |
| WARS    | 3  | -0.50 | 0.18 | 4.98E-03 |
| WASF1   | 3  | 0.17  | 0.15 | 2.62E-01 |
| WASF3   | 1  | -0.07 | 0.33 | 8.34E-01 |
| WFDC12  | 9  | 0.29  | 0.15 | 5.93E-02 |
| WFDC2   | 3  | -0.57 | 0.39 | 1.44E-01 |
| WFIKKN1 | 12 | -0.27 | 0.13 | 4.59E-02 |
| WFIKKN2 | 4  | 0.06  | 0.07 | 3.61E-01 |
| WIF1    | 13 | 0.07  | 0.13 | 6.02E-01 |
| WWP2    | 3  | 0.14  | 0.23 | 5.49E-01 |
| XCL1    | 9  | -0.13 | 0.06 | 3.50E-02 |
| XG      | 1  | -1.33 | 0.83 | 1.09E-01 |
| XPNPEP2 | 12 | -0.26 | 0.16 | 1.10E-01 |
| XRCC4   | 1  | -0.85 | 0.69 | 2.15E-01 |
| YES1    | 2  | -0.81 | 0.46 | 8.06E-02 |
| YTHDF3  | 1  | -0.10 | 0.52 | 8.52E-01 |
| ZBTB16  | 7  | 0.03  | 0.12 | 8.19E-01 |
| ZBTB17  | 1  | 0.97  | 0.62 | 1.16E-01 |

**Supplementary Table 17. Associations of genetically predicted proteins with mother's attained age using IVW method and cis+trans SNPs.**

| <b>Protein</b> | <b>No. of SNPs</b> | <b>Beta</b> | <b>SE</b> | <b>Pval</b> |
|----------------|--------------------|-------------|-----------|-------------|
| AARSD1         | 3                  | -0.08       | 0.30      | 8.01E-01    |
| ABHD14B        | 3                  | 0.06        | 0.45      | 8.89E-01    |
| ABL1           | 1                  | -0.02       | 0.54      | 9.73E-01    |
| ACAA1          | 3                  | 0.77        | 0.35      | 2.63E-02    |
| ACAN           | 13                 | -0.22       | 0.18      | 2.16E-01    |
| ACE2           | 7                  | 0.14        | 0.23      | 5.41E-01    |
| ACOX1          | 1                  | -0.25       | 0.62      | 6.88E-01    |
| ACP5           | 10                 | 0.18        | 0.12      | 1.14E-01    |
| ACP6           | 2                  | 0.02        | 0.05      | 7.13E-01    |
| ACVRL1         | 3                  | -0.01       | 0.14      | 9.45E-01    |
| ACY1           | 3                  | 0.25        | 0.19      | 1.76E-01    |
| ADA            | 4                  | -0.08       | 0.07      | 2.78E-01    |
| ADA2           | 13                 | -0.27       | 0.13      | 3.86E-02    |
| ADAM15         | 8                  | 0.06        | 0.05      | 2.80E-01    |
| ADAM22         | 6                  | 0.05        | 0.08      | 5.28E-01    |
| ADAM23         | 4                  | 0.12        | 0.08      | 1.59E-01    |
| ADAM8          | 7                  | -0.27       | 0.09      | 3.21E-03    |
| ADAMTS13       | 10                 | 0.08        | 0.11      | 4.44E-01    |
| ADAMTS15       | 2                  | 0.37        | 0.38      | 3.32E-01    |
| ADAMTS16       | 1                  | 0.32        | 0.38      | 3.96E-01    |
| ADAMTS8        | 3                  | 0.10        | 0.10      | 3.27E-01    |
| ADGRB3         | 4                  | 0.06        | 0.05      | 2.51E-01    |
| ADGRE2         | 8                  | -0.04       | 0.13      | 7.40E-01    |
| ADGRE5         | 9                  | 0.00        | 0.16      | 9.90E-01    |
| ADGRG1         | 9                  | 0.46        | 0.19      | 1.36E-02    |
| ADGRG2         | 5                  | 0.32        | 0.30      | 2.91E-01    |
| ADH4           | 6                  | 0.25        | 0.24      | 2.89E-01    |
| ADM            | 1                  | -2.74       | 0.93      | 3.18E-03    |
| AFP            | 19                 | 0.01        | 0.10      | 8.81E-01    |
| AGER           | 12                 | 0.22        | 0.16      | 1.60E-01    |
| AGR2           | 4                  | 0.68        | 0.30      | 2.57E-02    |
| AGR3           | 2                  | -0.31       | 0.48      | 5.14E-01    |
| AGRN           | 6                  | 0.22        | 0.11      | 5.37E-02    |
| AGRP           | 9                  | -0.30       | 0.22      | 1.87E-01    |
| AGXT           | 10                 | -0.05       | 0.22      | 8.21E-01    |
| AHCY           | 1                  | 0.05        | 0.13      | 6.85E-01    |
| AHSP           | 7                  | -0.60       | 0.23      | 1.05E-02    |
| AIF1           | 1                  | 0.37        | 0.40      | 3.61E-01    |
| AIFM1          | 2                  | 0.84        | 0.59      | 1.56E-01    |
| AKR1B1         | 3                  | -0.53       | 0.28      | 5.64E-02    |
| AKR1C4         | 1                  | 0.01        | 0.85      | 9.94E-01    |
| AKT1S1         | 3                  | 0.56        | 0.41      | 1.72E-01    |
| AKT3           | 2                  | 0.13        | 0.60      | 8.27E-01    |
| ALCAM          | 11                 | -0.03       | 0.17      | 8.40E-01    |
| ALDH1A1        | 3                  | -0.18       | 0.34      | 5.98E-01    |
| ALDH3A1        | 1                  | 0.03        | 0.10      | 7.37E-01    |
| ALPP           | 9                  | 0.42        | 0.22      | 5.52E-02    |
| AMBP           | 9                  | 0.26        | 0.16      | 1.17E-01    |
| AMIGO2         | 11                 | 0.15        | 0.12      | 2.13E-01    |
| AMN            | 5                  | 0.02        | 0.06      | 6.89E-01    |
| AMY2A          | 7                  | -0.02       | 0.11      | 8.29E-01    |
| AMY2B          | 8                  | 0.10        | 0.10      | 3.24E-01    |
| ANG            | 3                  | 0.07        | 0.10      | 4.84E-01    |
| ANGPT1         | 16                 | -0.21       | 0.13      | 1.13E-01    |
| ANGPT2         | 6                  | -0.31       | 0.18      | 9.80E-02    |
| ANGPTL1        | 6                  | -0.10       | 0.14      | 4.57E-01    |
| ANGPTL2        | 4                  | -0.45       | 0.29      | 1.15E-01    |

|          |    |       |      |          |
|----------|----|-------|------|----------|
| ANGPTL3  | 5  | 0.12  | 0.30 | 6.82E-01 |
| ANGPTL4  | 1  | -0.08 | 0.16 | 6.17E-01 |
| ANGPTL7  | 6  | 0.01  | 0.11 | 9.45E-01 |
| ANKRD54  | 1  | 0.94  | 0.66 | 1.58E-01 |
| ANPEP    | 7  | 0.05  | 0.11 | 6.44E-01 |
| ANXA11   | 2  | 0.23  | 0.54 | 6.75E-01 |
| ANXA3    | 5  | -0.03 | 0.30 | 9.22E-01 |
| ANXA4    | 2  | 0.46  | 0.51 | 3.71E-01 |
| ANXA5    | 1  | -0.51 | 0.40 | 2.06E-01 |
| AOC1     | 1  | 0.04  | 0.16 | 8.14E-01 |
| AOC3     | 10 | 0.02  | 0.08 | 7.53E-01 |
| APBB1IP  | 5  | -0.25 | 0.15 | 9.52E-02 |
| APEX1    | 3  | 0.13  | 0.11 | 2.49E-01 |
| APLP1    | 3  | 0.46  | 0.35 | 1.82E-01 |
| APOH     | 1  | 0.21  | 0.09 | 1.74E-02 |
| APOM     | 8  | 0.45  | 0.13 | 7.09E-04 |
| APP      | 14 | -0.18 | 0.15 | 2.25E-01 |
| APRT     | 5  | 0.02  | 0.28 | 9.40E-01 |
| AREG     | 3  | 0.41  | 0.24 | 8.75E-02 |
| ARG1     | 5  | 0.32  | 0.19 | 8.52E-02 |
| ARHGAP1  | 2  | -0.07 | 0.42 | 8.64E-01 |
| ARHGAP25 | 2  | 0.05  | 0.41 | 8.96E-01 |
| ARSA     | 7  | 0.09  | 0.06 | 1.65E-01 |
| ARSB     | 10 | -0.07 | 0.12 | 5.63E-01 |
| ART3     | 4  | -0.44 | 0.37 | 2.45E-01 |
| ARTN     | 1  | 0.77  | 0.68 | 2.57E-01 |
| ASAH2    | 15 | -0.09 | 0.07 | 2.41E-01 |
| ASGR1    | 6  | -0.17 | 0.17 | 3.36E-01 |
| ATF2     | 1  | 0.03  | 0.37 | 9.32E-01 |
| ATG4A    | 3  | -0.39 | 0.44 | 3.79E-01 |
| ATOX1    | 3  | -0.60 | 0.44 | 1.77E-01 |
| ATP5IF1  | 5  | 0.28  | 0.29 | 3.41E-01 |
| ATP6V1F  | 1  | -0.02 | 0.69 | 9.73E-01 |
| ATXN10   | 5  | 0.34  | 0.28 | 2.32E-01 |
| AXIN1    | 3  | -0.14 | 0.46 | 7.68E-01 |
| AXL      | 6  | -0.03 | 0.16 | 8.59E-01 |
| AZU1     | 2  | -0.12 | 0.55 | 8.27E-01 |
| B4GALT1  | 7  | -0.11 | 0.12 | 3.62E-01 |
| B4GAT1   | 8  | 0.14  | 0.12 | 2.67E-01 |
| BACH1    | 3  | 0.02  | 0.48 | 9.68E-01 |
| BAG3     | 1  | -0.30 | 0.72 | 6.72E-01 |
| BAIAP2   | 5  | 1.00  | 0.32 | 1.86E-03 |
| BAMBI    | 1  | 0.02  | 0.68 | 9.73E-01 |
| BANK1    | 3  | 0.42  | 0.30 | 1.63E-01 |
| BAX      | 2  | 0.25  | 0.55 | 6.48E-01 |
| BCAM     | 13 | -0.11 | 0.09 | 2.23E-01 |
| BCAN     | 7  | 0.06  | 0.15 | 6.75E-01 |
| BCL2L11  | 6  | -0.26 | 0.18 | 1.41E-01 |
| BCR      | 1  | 0.79  | 0.70 | 2.63E-01 |
| BGN      | 9  | -0.14 | 0.20 | 4.61E-01 |
| BID      | 2  | 0.18  | 0.43 | 6.77E-01 |
| BIN2     | 2  | -0.29 | 0.52 | 5.79E-01 |
| BIRC2    | 4  | 0.19  | 0.40 | 6.33E-01 |
| BLMH     | 2  | 0.03  | 0.08 | 7.36E-01 |
| BLVRB    | 2  | -0.36 | 0.21 | 8.60E-02 |
| BMP4     | 5  | 0.48  | 0.28 | 8.66E-02 |
| BMP6     | 11 | 0.23  | 0.14 | 9.41E-02 |
| BOC      | 8  | 0.11  | 0.19 | 5.63E-01 |
| BPIFB1   | 13 | -0.01 | 0.09 | 9.32E-01 |

|          |    |       |      |          |
|----------|----|-------|------|----------|
| BRK1     | 6  | 0.05  | 0.19 | 8.02E-01 |
| BSG      | 9  | 0.25  | 0.19 | 1.79E-01 |
| BST1     | 4  | 0.09  | 0.04 | 3.17E-02 |
| BST2     | 11 | -0.33 | 0.18 | 6.89E-02 |
| BTC      | 3  | 0.05  | 0.11 | 6.62E-01 |
| BTN2A1   | 6  | -0.01 | 0.13 | 9.26E-01 |
| BTN3A2   | 3  | -0.02 | 0.07 | 7.70E-01 |
| C19orf12 | 4  | 0.66  | 0.31 | 3.30E-02 |
| C1QA     | 12 | -0.02 | 0.10 | 8.57E-01 |
| C1QTNF1  | 4  | -0.03 | 0.16 | 8.62E-01 |
| C2       | 2  | 0.46  | 0.37 | 2.12E-01 |
| C2CD2L   | 1  | -0.07 | 0.82 | 9.28E-01 |
| C4BPB    | 9  | -0.47 | 0.13 | 3.42E-04 |
| CA1      | 4  | -0.61 | 0.27 | 2.11E-02 |
| CA11     | 2  | -0.71 | 0.26 | 6.92E-03 |
| CA12     | 6  | -0.03 | 0.14 | 8.13E-01 |
| CA13     | 3  | -0.15 | 0.16 | 3.66E-01 |
| CA14     | 4  | 0.39  | 0.22 | 7.63E-02 |
| CA2      | 2  | 0.06  | 0.39 | 8.85E-01 |
| CA3      | 6  | -0.19 | 0.18 | 2.91E-01 |
| CA4      | 8  | 0.34  | 0.11 | 3.01E-03 |
| CA5A     | 5  | -0.06 | 0.07 | 4.14E-01 |
| CA6      | 11 | 0.03  | 0.06 | 6.89E-01 |
| CA9      | 5  | 0.50  | 0.20 | 1.34E-02 |
| CALB1    | 3  | -0.05 | 0.29 | 8.53E-01 |
| CALCA    | 4  | 1.17  | 0.32 | 2.24E-04 |
| CALCOCO1 | 4  | -0.03 | 0.30 | 9.26E-01 |
| CAMKK1   | 3  | -0.02 | 0.15 | 8.71E-01 |
| CANTI    | 5  | 0.07  | 0.23 | 7.60E-01 |
| CAPG     | 2  | 0.02  | 0.05 | 6.63E-01 |
| CARHSP1  | 1  | -0.45 | 0.56 | 4.23E-01 |
| CASP1    | 1  | 0.00  | 0.17 | 9.91E-01 |
| CASP10   | 3  | -0.23 | 0.21 | 2.74E-01 |
| CASP2    | 2  | 0.06  | 0.40 | 8.90E-01 |
| CASP3    | 1  | -0.50 | 0.63 | 4.27E-01 |
| CASP8    | 3  | 0.24  | 0.19 | 2.12E-01 |
| CBLIF    | 9  | 0.16  | 0.09 | 1.02E-01 |
| CBLN4    | 5  | 0.14  | 0.19 | 4.63E-01 |
| CC2D1A   | 2  | -0.35 | 0.49 | 4.79E-01 |
| CCDC80   | 5  | 0.20  | 0.20 | 3.03E-01 |
| CCL11    | 8  | 0.20  | 0.15 | 2.05E-01 |
| CCL13    | 12 | 0.14  | 0.12 | 2.23E-01 |
| CCL14    | 5  | 0.01  | 0.09 | 8.95E-01 |
| CCL15    | 4  | 0.87  | 0.21 | 3.90E-05 |
| CCL16    | 7  | 0.06  | 0.06 | 2.87E-01 |
| CCL17    | 12 | -0.08 | 0.09 | 3.94E-01 |
| CCL18    | 3  | 0.20  | 0.09 | 2.81E-02 |
| CCL19    | 4  | -0.96 | 0.30 | 1.37E-03 |
| CCL2     | 8  | 0.24  | 0.14 | 7.36E-02 |
| CCL20    | 4  | -0.27 | 0.29 | 3.50E-01 |
| CCL21    | 10 | -0.30 | 0.19 | 1.15E-01 |
| CCL22    | 6  | -0.22 | 0.17 | 2.02E-01 |
| CCL23    | 7  | 0.07  | 0.11 | 5.39E-01 |
| CCL24    | 10 | -0.01 | 0.05 | 8.07E-01 |
| CCL25    | 6  | 0.12  | 0.06 | 2.96E-02 |
| CCL26    | 5  | -0.11 | 0.15 | 4.68E-01 |
| CCL27    | 7  | 0.15  | 0.17 | 3.72E-01 |
| CCL28    | 16 | 0.10  | 0.14 | 4.48E-01 |
| CCL3     | 6  | -1.15 | 0.31 | 1.88E-04 |

|         |    |       |      |          |
|---------|----|-------|------|----------|
| CCL4    | 5  | -0.22 | 0.11 | 4.54E-02 |
| CCL5    | 9  | -0.09 | 0.16 | 5.47E-01 |
| CCL7    | 4  | -0.09 | 0.13 | 4.80E-01 |
| CCL8    | 8  | -0.03 | 0.05 | 5.98E-01 |
| CCN1    | 11 | -0.40 | 0.19 | 2.95E-02 |
| CCN2    | 16 | -0.06 | 0.11 | 5.86E-01 |
| CCN3    | 3  | 0.10  | 0.18 | 5.88E-01 |
| CCN4    | 11 | -0.25 | 0.10 | 1.09E-02 |
| CCN5    | 1  | 2.49  | 0.92 | 7.15E-03 |
| CCS     | 1  | 0.00  | 0.09 | 9.60E-01 |
| CD109   | 6  | 0.75  | 0.19 | 1.13E-04 |
| CD14    | 5  | 0.28  | 0.14 | 4.99E-02 |
| CD160   | 14 | -0.12 | 0.09 | 1.82E-01 |
| CD163   | 17 | -0.12 | 0.09 | 2.02E-01 |
| CD164   | 9  | 0.05  | 0.18 | 7.90E-01 |
| CD177   | 3  | 0.07  | 0.09 | 4.17E-01 |
| CD1C    | 17 | -0.38 | 0.12 | 1.68E-03 |
| CD200   | 7  | -0.07 | 0.17 | 7.00E-01 |
| CD200R1 | 9  | 0.05  | 0.06 | 3.49E-01 |
| CD207   | 14 | 0.06  | 0.08 | 4.58E-01 |
| CD209   | 8  | -0.15 | 0.05 | 3.62E-03 |
| CD22    | 18 | -0.04 | 0.12 | 7.56E-01 |
| CD244   | 13 | 0.03  | 0.09 | 7.46E-01 |
| CD27    | 7  | -0.43 | 0.15 | 5.57E-03 |
| CD274   | 6  | 0.03  | 0.14 | 8.49E-01 |
| CD276   | 7  | 0.07  | 0.05 | 1.92E-01 |
| CD28    | 8  | 0.00  | 0.14 | 9.81E-01 |
| CD2AP   | 1  | -0.02 | 0.70 | 9.73E-01 |
| CD300C  | 12 | -0.04 | 0.09 | 6.27E-01 |
| CD300E  | 10 | -0.25 | 0.11 | 2.64E-02 |
| CD300LF | 9  | -0.05 | 0.04 | 2.57E-01 |
| CD300LG | 10 | 0.19  | 0.11 | 7.58E-02 |
| CD302   | 5  | -0.26 | 0.14 | 5.49E-02 |
| CD33    | 7  | -0.05 | 0.04 | 1.92E-01 |
| CD34    | 3  | 0.45  | 0.12 | 1.16E-04 |
| CD38    | 2  | 0.03  | 0.12 | 7.89E-01 |
| CD4     | 4  | -0.14 | 0.12 | 2.52E-01 |
| CD40    | 9  | 0.12  | 0.11 | 2.68E-01 |
| CD40LG  | 12 | -0.25 | 0.17 | 1.41E-01 |
| CD46    | 7  | 0.68  | 0.25 | 6.75E-03 |
| CD48    | 8  | -0.05 | 0.06 | 4.26E-01 |
| CD5     | 8  | -0.66 | 0.18 | 1.81E-04 |
| CD55    | 6  | 0.10  | 0.10 | 2.80E-01 |
| CD58    | 11 | 0.23  | 0.09 | 1.06E-02 |
| CD59    | 5  | 0.13  | 0.17 | 4.42E-01 |
| CD6     | 10 | -0.13 | 0.06 | 1.61E-02 |
| CD63    | 8  | -0.32 | 0.18 | 6.50E-02 |
| CD69    | 5  | -0.09 | 0.24 | 6.94E-01 |
| CD70    | 3  | -0.11 | 0.06 | 4.92E-02 |
| CD74    | 6  | -0.40 | 0.17 | 1.93E-02 |
| CD79B   | 13 | 0.28  | 0.13 | 3.86E-02 |
| CD83    | 12 | -0.20 | 0.15 | 2.04E-01 |
| CD84    | 11 | -0.25 | 0.15 | 8.41E-02 |
| CD8A    | 3  | -0.19 | 0.16 | 2.40E-01 |
| CD93    | 5  | 0.08  | 0.31 | 7.89E-01 |
| CD99    | 4  | -0.07 | 0.31 | 8.19E-01 |
| CD99L2  | 8  | -0.35 | 0.18 | 5.16E-02 |
| CDC27   | 2  | -0.08 | 0.46 | 8.62E-01 |
| CDC37   | 2  | 0.77  | 0.52 | 1.41E-01 |

|               |    |       |      |          |
|---------------|----|-------|------|----------|
| CDCP1         | 7  | 0.07  | 0.15 | 6.58E-01 |
| CDH1          | 6  | 0.52  | 0.08 | 4.07E-10 |
| CDH15         | 3  | 0.26  | 0.14 | 5.92E-02 |
| CDH17         | 10 | 0.37  | 0.07 | 4.48E-07 |
| CDH2          | 13 | 0.02  | 0.18 | 9.24E-01 |
| CDH3          | 6  | -0.04 | 0.28 | 8.76E-01 |
| CDH5          | 11 | -0.01 | 0.07 | 8.32E-01 |
| CDH6          | 6  | 0.10  | 0.08 | 2.18E-01 |
| CDHR1         | 4  | -0.05 | 0.17 | 7.57E-01 |
| CDHR2         | 6  | 1.95  | 0.34 | 9.33E-09 |
| CDHR5         | 7  | -0.18 | 0.08 | 2.08E-02 |
| CDKN1A        | 5  | 0.23  | 0.24 | 3.39E-01 |
| CDKN2D        | 4  | -0.08 | 0.29 | 7.86E-01 |
| CDNF          | 1  | -0.02 | 0.11 | 8.29E-01 |
| CDON          | 4  | 0.14  | 0.28 | 6.25E-01 |
| CDSN          | 17 | -0.20 | 0.16 | 2.09E-01 |
| CEACAM1       | 6  | -0.26 | 0.15 | 7.61E-02 |
| CEACAM21      | 2  | -2.10 | 0.82 | 1.07E-02 |
| CEACAM3       | 1  | -0.58 | 0.63 | 3.58E-01 |
| CEACAM5       | 10 | -0.16 | 0.08 | 6.04E-02 |
| CEACAM8       | 9  | -0.08 | 0.16 | 6.19E-01 |
| CEBPB         | 3  | 0.42  | 0.44 | 3.36E-01 |
| CELA3A        | 14 | -0.15 | 0.11 | 1.55E-01 |
| CEP20         | 4  | 0.13  | 0.27 | 6.43E-01 |
| CEP43         | 6  | 0.26  | 0.30 | 3.93E-01 |
| CEP85         | 2  | 0.33  | 0.33 | 3.24E-01 |
| CERT          | 4  | 0.28  | 0.34 | 4.12E-01 |
| CES1          | 16 | 0.61  | 0.17 | 4.06E-04 |
| CES2          | 2  | -0.11 | 0.32 | 7.40E-01 |
| CES3          | 9  | -0.03 | 0.15 | 8.29E-01 |
| CETN2         | 3  | 0.66  | 0.36 | 6.40E-02 |
| CFC1          | 6  | 0.95  | 0.30 | 1.65E-03 |
| CGA           | 1  | -1.02 | 1.13 | 3.67E-01 |
| CGREF1        | 3  | 0.12  | 0.07 | 9.63E-02 |
| CHAC2         | 2  | 0.03  | 0.31 | 9.28E-01 |
| CHGB          | 5  | -0.09 | 0.07 | 2.00E-01 |
| CHI3L1        | 5  | 0.03  | 0.08 | 6.63E-01 |
| CHIT1         | 3  | -0.18 | 0.05 | 4.46E-04 |
| CHL1          | 6  | -0.02 | 0.13 | 8.94E-01 |
| CHMP1A        | 4  | 0.34  | 0.34 | 3.10E-01 |
| CHRDL1        | 3  | 0.36  | 0.46 | 4.40E-01 |
| CHRDL2        | 2  | 0.94  | 0.41 | 2.38E-02 |
| CIAPIN1       | 4  | 0.59  | 0.38 | 1.22E-01 |
| CKAP4         | 4  | -0.10 | 0.10 | 3.22E-01 |
| CKMT1A_CKMT1B | 6  | 0.54  | 0.24 | 2.83E-02 |
| CLC           | 8  | -0.27 | 0.18 | 1.33E-01 |
| CLEC10A       | 9  | 0.03  | 0.08 | 7.09E-01 |
| CLEC11A       | 4  | 0.18  | 0.15 | 2.32E-01 |
| CLEC14A       | 8  | 0.43  | 0.13 | 1.33E-03 |
| CLEC1A        | 7  | -0.06 | 0.09 | 5.06E-01 |
| CLEC1B        | 9  | -0.02 | 0.17 | 9.13E-01 |
| CLEC4A        | 11 | 0.28  | 0.08 | 6.04E-04 |
| CLEC4C        | 25 | -0.01 | 0.05 | 7.77E-01 |
| CLEC4D        | 10 | -0.03 | 0.07 | 7.11E-01 |
| CLEC4G        | 10 | -0.26 | 0.11 | 2.39E-02 |
| CLEC5A        | 9  | 0.15  | 0.13 | 2.47E-01 |
| CLEC6A        | 12 | -0.24 | 0.08 | 2.05E-03 |
| CLEC7A        | 3  | -0.03 | 0.05 | 6.18E-01 |
| CLIP2         | 2  | -0.20 | 0.33 | 5.47E-01 |



|         |    |       |      |          |
|---------|----|-------|------|----------|
| CLMP    | 4  | 0.04  | 0.13 | 7.78E-01 |
| CLPS    | 7  | 0.06  | 0.08 | 4.31E-01 |
| CLSPN   | 1  | 0.07  | 0.44 | 8.81E-01 |
| CLSTN2  | 3  | -0.15 | 0.11 | 1.80E-01 |
| CLTA    | 1  | 0.20  | 0.39 | 6.04E-01 |
| CLUL1   | 8  | 0.05  | 0.08 | 5.11E-01 |
| CNDP1   | 7  | 0.13  | 0.10 | 1.99E-01 |
| CNPY2   | 1  | -0.65 | 0.33 | 4.87E-02 |
| CNPY4   | 3  | 0.52  | 0.24 | 2.77E-02 |
| CNST    | 4  | -0.16 | 0.43 | 7.05E-01 |
| CNTN1   | 6  | -0.02 | 0.12 | 8.91E-01 |
| CNTN2   | 6  | 0.02  | 0.05 | 6.69E-01 |
| CNTN3   | 15 | -0.02 | 0.12 | 8.77E-01 |
| CNTN4   | 8  | 0.07  | 0.13 | 6.26E-01 |
| CNTN5   | 6  | 0.06  | 0.10 | 5.50E-01 |
| CNTNAP2 | 4  | -0.02 | 0.08 | 7.75E-01 |
| COL18A1 | 4  | 0.32  | 0.23 | 1.71E-01 |
| COL1A1  | 9  | 0.66  | 0.20 | 9.54E-04 |
| COL4A1  | 9  | 0.21  | 0.13 | 8.73E-02 |
| COL6A3  | 3  | 0.44  | 0.44 | 3.17E-01 |
| COL9A1  | 4  | -0.81 | 0.23 | 5.84E-04 |
| COLEC12 | 4  | 0.10  | 0.27 | 7.14E-01 |
| COMP    | 6  | 0.31  | 0.15 | 4.25E-02 |
| COMT    | 2  | -0.11 | 0.10 | 2.64E-01 |
| CORO1A  | 3  | 1.03  | 0.42 | 1.39E-02 |
| COX5B   | 5  | -0.03 | 0.26 | 9.21E-01 |
| CPA1    | 16 | 0.27  | 0.13 | 3.30E-02 |
| CPA2    | 4  | 0.18  | 0.11 | 1.23E-01 |
| CPB1    | 10 | 0.19  | 0.13 | 1.57E-01 |
| CPE     | 6  | 1.23  | 0.25 | 1.35E-06 |
| CPM     | 9  | -0.23 | 0.21 | 2.81E-01 |
| CPPED1  | 1  | -0.07 | 0.07 | 3.35E-01 |
| CPVL    | 8  | 0.17  | 0.06 | 7.03E-03 |
| CPXM1   | 15 | -0.07 | 0.10 | 5.03E-01 |
| CR2     | 20 | -0.08 | 0.12 | 4.93E-01 |
| CRACR2A | 4  | 0.38  | 0.27 | 1.68E-01 |
| CRADD   | 4  | 0.68  | 0.38 | 7.16E-02 |
| CREG1   | 10 | 0.55  | 0.15 | 2.75E-04 |
| CRELD2  | 11 | -0.12 | 0.12 | 3.27E-01 |
| CRH     | 19 | -0.16 | 0.10 | 8.89E-02 |
| CRHBP   | 4  | -0.12 | 0.08 | 1.11E-01 |
| CRIM1   | 4  | 0.44  | 0.32 | 1.74E-01 |
| CRIP2   | 3  | 0.03  | 0.25 | 9.05E-01 |
| CRISP2  | 12 | -0.13 | 0.08 | 1.09E-01 |
| CRKL    | 1  | -0.55 | 0.70 | 4.27E-01 |
| CRLF1   | 5  | -0.78 | 0.33 | 1.87E-02 |
| CRNN    | 3  | 0.00  | 0.07 | 9.74E-01 |
| CRTAC1  | 1  | -0.02 | 0.07 | 8.15E-01 |
| CRTAM   | 11 | -0.12 | 0.12 | 3.26E-01 |
| CSF1    | 3  | -0.32 | 0.22 | 1.33E-01 |
| CSF2RA  | 1  | 1.62  | 0.58 | 5.17E-03 |
| CSF3    | 2  | 0.02  | 0.24 | 9.18E-01 |
| CST3    | 6  | 0.00  | 0.15 | 9.91E-01 |
| CST5    | 13 | -0.09 | 0.06 | 1.06E-01 |
| CST6    | 12 | -0.22 | 0.14 | 1.17E-01 |
| CST7    | 10 | -0.14 | 0.06 | 1.71E-02 |
| CTF1    | 2  | 0.15  | 0.60 | 8.00E-01 |
| CTRB1   | 11 | 0.13  | 0.08 | 9.30E-02 |
| CTRC    | 11 | 0.05  | 0.07 | 5.23E-01 |

|               |    |       |      |          |
|---------------|----|-------|------|----------|
| CTSB          | 7  | 0.02  | 0.08 | 8.34E-01 |
| CTSC          | 7  | -0.03 | 0.07 | 7.24E-01 |
| CTSD          | 6  | 0.17  | 0.12 | 1.75E-01 |
| CTSF          | 14 | 0.23  | 0.11 | 4.20E-02 |
| CTSH          | 1  | -0.11 | 0.51 | 8.23E-01 |
| CTSL          | 15 | -0.07 | 0.14 | 6.24E-01 |
| CTSO          | 9  | -0.15 | 0.16 | 3.27E-01 |
| CTSS          | 7  | -0.24 | 0.25 | 3.22E-01 |
| CTSV          | 16 | 0.20  | 0.13 | 1.36E-01 |
| CTSZ          | 9  | 0.11  | 0.09 | 2.00E-01 |
| CX3CL1        | 5  | 0.04  | 0.30 | 8.85E-01 |
| CXADR         | 5  | 0.79  | 0.18 | 8.33E-06 |
| CXCL1         | 4  | 0.03  | 0.08 | 6.97E-01 |
| CXCL10        | 3  | -0.20 | 0.14 | 1.65E-01 |
| CXCL11        | 6  | -0.47 | 0.18 | 8.29E-03 |
| CXCL12        | 9  | -0.24 | 0.18 | 1.91E-01 |
| CXCL13        | 7  | -1.11 | 0.26 | 2.27E-05 |
| CXCL14        | 2  | -1.19 | 0.51 | 1.83E-02 |
| CXCL16        | 11 | 0.37  | 0.15 | 1.30E-02 |
| CXCL17        | 5  | 0.15  | 0.32 | 6.49E-01 |
| CXCL3         | 3  | 0.76  | 0.36 | 3.67E-02 |
| CXCL5         | 8  | 0.10  | 0.09 | 3.05E-01 |
| CXCL6         | 6  | 0.03  | 0.08 | 6.65E-01 |
| CXCL8         | 6  | 0.15  | 0.20 | 4.69E-01 |
| CXCL9         | 5  | -1.04 | 0.22 | 1.73E-06 |
| DAB2          | 3  | 0.41  | 0.43 | 3.41E-01 |
| DAG1          | 3  | -0.68 | 0.49 | 1.65E-01 |
| DAPP1         | 2  | -0.17 | 0.38 | 6.50E-01 |
| DARS1         | 4  | 0.73  | 0.34 | 3.10E-02 |
| DBI           | 3  | -0.40 | 0.16 | 1.52E-02 |
| DBNL          | 4  | 0.13  | 0.40 | 7.36E-01 |
| DCBLD2        | 15 | -0.11 | 0.12 | 3.72E-01 |
| DCN           | 1  | -0.57 | 0.73 | 4.32E-01 |
| DCTN1         | 1  | -0.13 | 0.66 | 8.43E-01 |
| DCTN2         | 2  | 0.94  | 0.62 | 1.31E-01 |
| DCTPP1        | 6  | 0.10  | 0.24 | 6.88E-01 |
| DCXR          | 6  | 0.06  | 0.27 | 8.35E-01 |
| DDAH1         | 5  | -0.06 | 0.22 | 7.74E-01 |
| DDC           | 6  | 0.31  | 0.11 | 5.81E-03 |
| DDR1          | 11 | 0.05  | 0.10 | 6.46E-01 |
| DDX58         | 1  | 0.38  | 0.17 | 2.38E-02 |
| DECR1         | 3  | 0.07  | 0.30 | 8.23E-01 |
| DEFA1_DEFA1B  | 13 | -0.12 | 0.17 | 4.97E-01 |
| DEFB4A_DEFB4B | 3  | 0.58  | 0.31 | 6.49E-02 |
| DFFA          | 2  | 0.17  | 0.51 | 7.41E-01 |
| DIABLO        | 3  | 0.58  | 0.48 | 2.32E-01 |
| DKK1          | 9  | -0.13 | 0.15 | 3.83E-01 |
| DKK3          | 7  | 0.05  | 0.11 | 6.26E-01 |
| DKK4          | 5  | 0.00  | 0.14 | 9.87E-01 |
| DKKL1         | 4  | -0.03 | 0.04 | 4.24E-01 |
| DLK1          | 5  | -0.04 | 0.09 | 6.86E-01 |
| DLL1          | 6  | -0.03 | 0.20 | 8.95E-01 |
| DNAJA2        | 1  | 1.50  | 0.73 | 3.91E-02 |
| DNAJB1        | 5  | 0.34  | 0.31 | 2.77E-01 |
| DNAJB8        | 1  | -0.12 | 0.55 | 8.27E-01 |
| DNER          | 6  | -0.17 | 0.29 | 5.65E-01 |
| DNMBP         | 3  | -0.05 | 0.33 | 8.68E-01 |
| DNPH1         | 1  | 0.05  | 0.15 | 7.64E-01 |
| DOK2          | 4  | 0.63  | 0.35 | 7.41E-02 |

|           |    |       |      |          |
|-----------|----|-------|------|----------|
| DPEP1     | 5  | 0.60  | 0.25 | 1.50E-02 |
| DPEP2     | 3  | 0.24  | 0.15 | 1.05E-01 |
| DPP10     | 5  | 0.16  | 0.14 | 2.62E-01 |
| DPP4      | 5  | -0.07 | 0.18 | 6.76E-01 |
| DPP6      | 7  | 0.24  | 0.14 | 7.80E-02 |
| DPP7      | 5  | -0.09 | 0.18 | 6.14E-01 |
| DPT       | 2  | 0.37  | 0.13 | 5.46E-03 |
| DPY30     | 2  | 0.14  | 0.58 | 8.03E-01 |
| DRAXIN    | 15 | -0.02 | 0.12 | 8.76E-01 |
| DRG2      | 3  | -0.03 | 0.32 | 9.28E-01 |
| DSC2      | 9  | 0.27  | 0.14 | 5.94E-02 |
| DSG2      | 9  | 0.18  | 0.14 | 1.90E-01 |
| DSG3      | 15 | 0.06  | 0.11 | 6.03E-01 |
| DSG4      | 20 | 0.08  | 0.13 | 5.40E-01 |
| DTX3      | 3  | -0.15 | 0.23 | 5.20E-01 |
| DUSP3     | 2  | 0.43  | 0.48 | 3.77E-01 |
| EBAG9     | 5  | -0.09 | 0.31 | 7.80E-01 |
| EBI3_IL27 | 14 | -0.42 | 0.14 | 1.81E-03 |
| ECE1      | 5  | 0.43  | 0.21 | 3.95E-02 |
| EDA2R     | 3  | -0.47 | 0.51 | 3.55E-01 |
| EDAR      | 20 | 0.04  | 0.08 | 6.33E-01 |
| EDIL3     | 3  | 0.24  | 0.25 | 3.39E-01 |
| EFEMP1    | 3  | 0.36  | 0.22 | 9.80E-02 |
| EFNA1     | 4  | 0.03  | 0.13 | 8.34E-01 |
| EFNA4     | 4  | -0.86 | 0.27 | 1.60E-03 |
| EGF       | 8  | -0.16 | 0.20 | 4.34E-01 |
| EGFL7     | 17 | -0.08 | 0.13 | 5.50E-01 |
| EGFR      | 5  | 0.43  | 0.31 | 1.68E-01 |
| EGLN1     | 3  | -0.07 | 0.26 | 8.05E-01 |
| EIF4B     | 3  | 0.46  | 0.38 | 2.29E-01 |
| EIF4G1    | 3  | 0.23  | 0.38 | 5.44E-01 |
| ELOA      | 2  | -0.46 | 0.31 | 1.32E-01 |
| ENAH      | 1  | -0.02 | 0.42 | 9.71E-01 |
| ENG       | 7  | 0.13  | 0.08 | 1.35E-01 |
| ENO1      | 4  | 0.21  | 0.25 | 4.07E-01 |
| ENO2      | 5  | -0.08 | 0.23 | 7.19E-01 |
| ENPP2     | 8  | 0.32  | 0.16 | 4.21E-02 |
| ENPP5     | 6  | 0.03  | 0.06 | 6.42E-01 |
| ENPP7     | 6  | -0.11 | 0.05 | 2.40E-02 |
| ENTPD2    | 2  | 0.16  | 0.61 | 7.91E-01 |
| ENTPD5    | 8  | -0.19 | 0.09 | 3.09E-02 |
| ENTPD6    | 8  | -0.09 | 0.05 | 8.65E-02 |
| EPCAM     | 11 | 0.38  | 0.12 | 1.33E-03 |
| EPHA1     | 7  | -0.05 | 0.17 | 7.54E-01 |
| EPHA2     | 6  | 0.51  | 0.23 | 3.04E-02 |
| EPHB4     | 9  | 0.27  | 0.12 | 2.07E-02 |
| EPHB6     | 4  | 0.08  | 0.15 | 5.65E-01 |
| EPO       | 9  | 0.54  | 0.17 | 1.34E-03 |
| EPS8L2    | 3  | -0.09 | 0.15 | 5.51E-01 |
| ERBB2     | 8  | -0.44 | 0.20 | 2.83E-02 |
| ERBB3     | 8  | -0.08 | 0.11 | 4.86E-01 |
| ERBB4     | 14 | 0.10  | 0.14 | 4.73E-01 |
| ERBIN     | 3  | 0.29  | 0.48 | 5.47E-01 |
| EREG      | 8  | -0.11 | 0.22 | 6.15E-01 |
| ERP44     | 5  | -0.10 | 0.12 | 3.95E-01 |
| ESAM      | 7  | 0.10  | 0.14 | 4.92E-01 |
| ESM1      | 10 | -0.38 | 0.17 | 2.87E-02 |
| EZR       | 2  | 0.21  | 0.53 | 6.89E-01 |
| F11R      | 11 | -0.29 | 0.22 | 2.00E-01 |

|        |    |       |      |          |
|--------|----|-------|------|----------|
| F2R    | 7  | 0.21  | 0.20 | 2.81E-01 |
| F3     | 8  | 0.63  | 0.11 | 1.81E-09 |
| F7     | 7  | -0.10 | 0.08 | 2.44E-01 |
| F9     | 2  | -0.01 | 0.36 | 9.77E-01 |
| FABP1  | 2  | 0.20  | 0.20 | 3.24E-01 |
| FABP2  | 5  | 0.17  | 0.18 | 3.59E-01 |
| FABP4  | 1  | 0.51  | 0.65 | 4.35E-01 |
| FABP5  | 2  | -0.64 | 0.38 | 8.99E-02 |
| FABP6  | 3  | -0.06 | 0.17 | 7.37E-01 |
| FABP9  | 15 | 0.11  | 0.09 | 2.12E-01 |
| FADD   | 3  | 0.87  | 0.41 | 3.57E-02 |
| FAM3B  | 6  | -0.14 | 0.07 | 5.16E-02 |
| FAM3C  | 1  | -1.22 | 0.74 | 9.71E-02 |
| FAP    | 5  | 0.01  | 0.16 | 9.44E-01 |
| FAS    | 3  | -0.04 | 0.17 | 8.23E-01 |
| FASLG  | 18 | -0.27 | 0.10 | 8.35E-03 |
| FBP1   | 5  | -0.11 | 0.14 | 4.26E-01 |
| FCAR   | 13 | -0.09 | 0.06 | 1.13E-01 |
| FCER2  | 10 | -0.02 | 0.12 | 8.85E-01 |
| FCGR2A | 5  | 0.11  | 0.05 | 1.89E-02 |
| FCGR2B | 4  | 0.00  | 0.09 | 9.76E-01 |
| FCGR3B | 12 | 0.00  | 0.13 | 9.75E-01 |
| FCN2   | 10 | 0.03  | 0.06 | 6.58E-01 |
| FCRL1  | 22 | -0.11 | 0.09 | 2.39E-01 |
| FCRL2  | 12 | -0.03 | 0.07 | 7.05E-01 |
| FCRL3  | 5  | -0.03 | 0.05 | 5.24E-01 |
| FCRL5  | 9  | -0.08 | 0.17 | 6.51E-01 |
| FCRL6  | 5  | 0.03  | 0.06 | 5.90E-01 |
| FCRLB  | 6  | 0.05  | 0.07 | 4.12E-01 |
| FEN1   | 1  | -0.11 | 0.84 | 8.99E-01 |
| FES    | 1  | 1.09  | 0.33 | 9.52E-04 |
| FETUB  | 3  | -0.46 | 0.29 | 1.17E-01 |
| FGF19  | 4  | 0.60  | 0.16 | 2.10E-04 |
| FGF2   | 6  | -0.09 | 0.06 | 1.83E-01 |
| FGF21  | 7  | -0.27 | 0.18 | 1.44E-01 |
| FGF23  | 4  | -0.18 | 0.27 | 4.99E-01 |
| FGF5   | 2  | -0.14 | 0.07 | 4.56E-02 |
| FGFBP1 | 10 | -0.32 | 0.22 | 1.38E-01 |
| FGFR2  | 7  | -0.10 | 0.24 | 6.91E-01 |
| FGR    | 1  | -0.22 | 0.48 | 6.50E-01 |
| FHIT   | 2  | 0.11  | 0.42 | 7.88E-01 |
| FIS1   | 4  | 0.59  | 0.24 | 1.45E-02 |
| FKBP1B | 4  | 0.13  | 0.18 | 4.82E-01 |
| FKBP4  | 5  | -0.51 | 0.32 | 1.09E-01 |
| FKBP5  | 5  | 0.11  | 0.20 | 5.93E-01 |
| FLI1   | 3  | -0.05 | 0.42 | 9.14E-01 |
| FLRT2  | 11 | -0.14 | 0.07 | 5.16E-02 |
| FLT1   | 9  | 0.24  | 0.11 | 2.32E-02 |
| FLT3   | 5  | 0.59  | 0.27 | 2.92E-02 |
| FLT3LG | 19 | 0.03  | 0.11 | 8.13E-01 |
| FLT4   | 10 | 0.10  | 0.06 | 7.73E-02 |
| FOLR1  | 7  | -0.18 | 0.21 | 3.88E-01 |
| FOLR2  | 14 | -0.41 | 0.13 | 1.45E-03 |
| FOLR3  | 9  | -0.50 | 0.22 | 2.50E-02 |
| FOXO1  | 3  | -0.10 | 0.28 | 7.23E-01 |
| FOXO3  | 1  | 3.90  | 0.80 | 1.08E-06 |
| FRZB   | 2  | -0.04 | 0.10 | 6.94E-01 |
| FST    | 3  | 0.04  | 0.24 | 8.56E-01 |
| FSTL3  | 2  | -0.07 | 0.43 | 8.72E-01 |

|           |    |       |      |          |
|-----------|----|-------|------|----------|
| FUCA1     | 5  | -0.06 | 0.04 | 1.32E-01 |
| FURIN     | 3  | -0.46 | 0.20 | 2.38E-02 |
| FUS       | 2  | -0.06 | 0.44 | 9.00E-01 |
| FUT3_FUT5 | 11 | 0.00  | 0.08 | 9.88E-01 |
| FUT8      | 11 | -0.07 | 0.06 | 2.20E-01 |
| FXN       | 3  | -0.12 | 0.46 | 7.97E-01 |
| FXYD5     | 2  | 0.30  | 0.47 | 5.18E-01 |
| FYB1      | 2  | -0.27 | 0.50 | 5.90E-01 |
| GAL       | 17 | 0.07  | 0.11 | 5.30E-01 |
| GALNT10   | 9  | -0.05 | 0.11 | 6.53E-01 |
| GALNT2    | 6  | 0.04  | 0.13 | 7.56E-01 |
| GALNT3    | 8  | 0.30  | 0.10 | 2.79E-03 |
| GALNT7    | 5  | -0.05 | 0.14 | 7.25E-01 |
| GAS6      | 15 | 0.06  | 0.10 | 5.02E-01 |
| GBP2      | 1  | 0.04  | 0.43 | 9.26E-01 |
| GCG       | 5  | -0.19 | 0.35 | 5.89E-01 |
| GCNT1     | 4  | -0.70 | 0.26 | 6.93E-03 |
| GDF15     | 1  | 0.11  | 0.16 | 4.88E-01 |
| GDF2      | 11 | -0.18 | 0.17 | 2.67E-01 |
| GDNF      | 1  | 0.26  | 0.19 | 1.77E-01 |
| GFAP      | 7  | -1.73 | 0.23 | 2.20E-14 |
| GFRA1     | 4  | -0.31 | 0.16 | 5.17E-02 |
| GFRA2     | 6  | 0.02  | 0.13 | 8.55E-01 |
| GFRA3     | 20 | 0.04  | 0.13 | 7.45E-01 |
| GGH       | 9  | -0.09 | 0.10 | 3.67E-01 |
| GGT1      | 7  | 0.05  | 0.14 | 7.31E-01 |
| GGT5      | 4  | -0.05 | 0.15 | 7.53E-01 |
| GHRL      | 8  | 0.19  | 0.16 | 2.40E-01 |
| GKN1      | 4  | 0.84  | 0.33 | 1.18E-02 |
| GLB1      | 8  | 0.06  | 0.11 | 6.29E-01 |
| GLO1      | 1  | 0.02  | 0.13 | 9.08E-01 |
| GLOD4     | 2  | -0.33 | 0.59 | 5.77E-01 |
| GLRX      | 2  | 0.07  | 0.09 | 4.26E-01 |
| GLT8D2    | 1  | 0.34  | 0.25 | 1.73E-01 |
| GMPR      | 2  | 0.23  | 0.18 | 1.84E-01 |
| GNE       | 3  | -0.03 | 0.30 | 9.11E-01 |
| GNLY      | 8  | -0.05 | 0.07 | 5.19E-01 |
| GOLM2     | 8  | -0.11 | 0.12 | 3.52E-01 |
| GOPC      | 2  | -0.23 | 0.48 | 6.31E-01 |
| GP1BA     | 14 | -0.51 | 0.16 | 9.97E-04 |
| GP2       | 8  | -0.19 | 0.07 | 8.60E-03 |
| GP6       | 6  | -0.23 | 0.13 | 7.79E-02 |
| GPA33     | 10 | 0.34  | 0.11 | 1.85E-03 |
| GPC1      | 14 | -0.15 | 0.18 | 4.12E-01 |
| GPC5      | 10 | 0.05  | 0.06 | 3.38E-01 |
| GPNMB     | 5  | 0.12  | 0.12 | 3.08E-01 |
| GPR37     | 10 | -0.08 | 0.06 | 1.83E-01 |
| GRAP2     | 3  | -0.36 | 0.42 | 3.98E-01 |
| GRK5      | 1  | 0.00  | 0.17 | 9.83E-01 |
| GRN       | 10 | -0.10 | 0.07 | 1.13E-01 |
| GRPEL1    | 3  | 0.57  | 0.38 | 1.26E-01 |
| GSAP      | 1  | -0.55 | 0.72 | 4.43E-01 |
| GSTA1     | 9  | -0.05 | 0.12 | 6.96E-01 |
| GSTA3     | 5  | -0.12 | 0.13 | 3.64E-01 |
| GSTP1     | 1  | 0.15  | 0.21 | 4.80E-01 |
| GUCA2A    | 7  | -0.12 | 0.17 | 4.66E-01 |
| GUSB      | 10 | 0.09  | 0.12 | 4.79E-01 |
| GYS1      | 3  | 0.43  | 0.17 | 1.12E-02 |
| GZMA      | 13 | 0.02  | 0.13 | 8.67E-01 |

|          |    |       |      |          |
|----------|----|-------|------|----------|
| GZMB     | 8  | -0.81 | 0.21 | 1.48E-04 |
| GZMH     | 7  | 0.04  | 0.17 | 8.17E-01 |
| HAGH     | 1  | -0.23 | 0.38 | 5.34E-01 |
| HAO1     | 8  | 0.01  | 0.25 | 9.68E-01 |
| HARS1    | 2  | 0.61  | 0.50 | 2.18E-01 |
| HAVCR1   | 6  | 0.01  | 0.09 | 8.68E-01 |
| HAVCR2   | 8  | -0.19 | 0.15 | 1.81E-01 |
| HBEGF    | 20 | 0.08  | 0.13 | 5.32E-01 |
| HBQ1     | 2  | -0.14 | 0.12 | 2.25E-01 |
| HCLS1    | 3  | -0.23 | 0.38 | 5.37E-01 |
| HDGF     | 2  | 0.06  | 0.04 | 1.29E-01 |
| HEBP1    | 1  | 0.24  | 0.36 | 5.13E-01 |
| HEXIM1   | 4  | -0.06 | 0.27 | 8.17E-01 |
| HGF      | 5  | -0.53 | 0.22 | 1.87E-02 |
| HGS      | 4  | 0.37  | 0.39 | 3.40E-01 |
| HLA-DRA  | 3  | -0.26 | 0.08 | 1.19E-03 |
| HLA-E    | 4  | -0.42 | 0.11 | 2.81E-04 |
| HMOX1    | 15 | 0.02  | 0.15 | 8.83E-01 |
| HMOX2    | 4  | -1.68 | 0.27 | 4.84E-10 |
| HNMT     | 4  | 0.09  | 0.06 | 1.51E-01 |
| HNRNPK   | 1  | -0.59 | 0.75 | 4.27E-01 |
| HPGDS    | 1  | 0.20  | 0.69 | 7.68E-01 |
| HS3ST3B1 | 7  | -0.20 | 0.12 | 9.30E-02 |
| HS6ST1   | 14 | 0.10  | 0.13 | 4.42E-01 |
| HSD11B1  | 7  | -0.21 | 0.14 | 1.45E-01 |
| HSPA1A   | 3  | 0.34  | 0.34 | 3.13E-01 |
| HSPB1    | 5  | 0.44  | 0.28 | 1.18E-01 |
| HSPB6    | 4  | -0.54 | 0.45 | 2.30E-01 |
| HSPG2    | 4  | -0.02 | 0.24 | 9.29E-01 |
| HTRA2    | 1  | -0.67 | 0.85 | 4.27E-01 |
| HYAL1    | 4  | -0.23 | 0.15 | 1.27E-01 |
| HYOU1    | 13 | -0.34 | 0.15 | 2.06E-02 |
| ICA1     | 2  | 0.07  | 0.21 | 7.25E-01 |
| ICAM1    | 6  | -0.13 | 0.10 | 1.90E-01 |
| ICAM2    | 9  | 0.12  | 0.04 | 6.01E-03 |
| ICAM3    | 20 | -0.06 | 0.09 | 4.90E-01 |
| ICAM4    | 14 | 0.01  | 0.06 | 9.28E-01 |
| ICAM5    | 5  | 0.09  | 0.06 | 1.00E-01 |
| ICOSLG   | 4  | 0.01  | 0.11 | 8.98E-01 |
| IDI2     | 1  | 0.06  | 0.14 | 6.55E-01 |
| IDS      | 3  | 0.01  | 0.20 | 9.73E-01 |
| IDUA     | 13 | 0.03  | 0.07 | 7.06E-01 |
| IFNG     | 2  | 1.08  | 0.58 | 6.15E-02 |
| IFNGR1   | 10 | -0.03 | 0.14 | 8.29E-01 |
| IFNGR2   | 8  | -0.06 | 0.04 | 2.03E-01 |
| IFNL1    | 3  | 0.78  | 0.36 | 3.10E-02 |
| IFNLR1   | 2  | -1.02 | 0.44 | 2.11E-02 |
| IGF1R    | 9  | 0.32  | 0.10 | 1.31E-03 |
| IGF2R    | 14 | -0.09 | 0.10 | 3.61E-01 |
| IGFBP1   | 2  | -0.52 | 0.45 | 2.44E-01 |
| IGFBP2   | 2  | -0.69 | 0.53 | 1.92E-01 |
| IGFBP3   | 5  | -0.11 | 0.09 | 2.32E-01 |
| IGFBP4   | 3  | 0.01  | 0.48 | 9.78E-01 |
| IGFBP6   | 3  | -0.15 | 0.46 | 7.41E-01 |
| IGFBP7   | 3  | -0.08 | 0.13 | 5.61E-01 |
| IGFBPL1  | 2  | -0.07 | 0.11 | 5.03E-01 |
| IGSF3    | 5  | 0.17  | 0.22 | 4.36E-01 |
| IGSF8    | 5  | 0.06  | 0.23 | 7.83E-01 |
| IKBKG    | 1  | -0.03 | 0.90 | 9.73E-01 |

|             |    |       |      |          |
|-------------|----|-------|------|----------|
| IKZF2       | 1  | 0.08  | 0.43 | 8.60E-01 |
| IL10        | 5  | -0.17 | 0.18 | 3.60E-01 |
| IL10RA      | 1  | -0.22 | 0.31 | 4.78E-01 |
| IL10RB      | 6  | 0.11  | 0.08 | 1.93E-01 |
| IL11        | 1  | 0.98  | 0.82 | 2.29E-01 |
| IL12A_IL12B | 15 | -0.06 | 0.08 | 4.01E-01 |
| IL12B       | 16 | -0.02 | 0.08 | 7.60E-01 |
| IL12RB1     | 3  | 0.04  | 0.09 | 6.94E-01 |
| IL13        | 1  | 0.45  | 0.49 | 3.60E-01 |
| IL13RA1     | 2  | -0.47 | 0.48 | 3.20E-01 |
| IL15        | 21 | -0.03 | 0.13 | 8.05E-01 |
| IL15RA      | 1  | -0.03 | 0.19 | 8.63E-01 |
| IL16        | 1  | -0.97 | 0.68 | 1.55E-01 |
| IL17C       | 2  | 0.41  | 0.33 | 2.17E-01 |
| IL17D       | 2  | -0.15 | 0.12 | 2.15E-01 |
| IL17F       | 1  | 0.41  | 0.70 | 5.59E-01 |
| IL17RA      | 3  | 0.00  | 0.05 | 9.52E-01 |
| IL17RB      | 9  | -0.03 | 0.06 | 5.34E-01 |
| IL18        | 8  | -0.32 | 0.11 | 3.95E-03 |
| IL18BP      | 9  | -0.27 | 0.18 | 1.44E-01 |
| IL18R1      | 12 | 0.00  | 0.06 | 9.58E-01 |
| IL18RAP     | 3  | -0.12 | 0.29 | 6.78E-01 |
| IL19        | 3  | -0.39 | 0.09 | 2.20E-05 |
| IL1A        | 1  | -1.07 | 0.39 | 6.08E-03 |
| IL1B        | 2  | -0.04 | 0.17 | 8.37E-01 |
| IL1R1       | 13 | -0.14 | 0.10 | 1.75E-01 |
| IL1R2       | 13 | 0.01  | 0.08 | 9.47E-01 |
| IL1RAP      | 3  | 1.05  | 0.54 | 5.10E-02 |
| IL1RL1      | 12 | -0.03 | 0.06 | 6.13E-01 |
| IL1RL2      | 12 | 0.04  | 0.09 | 6.73E-01 |
| IL1RN       | 2  | 0.04  | 0.20 | 8.36E-01 |
| IL20RA      | 1  | 0.70  | 0.61 | 2.54E-01 |
| IL22RA1     | 2  | 0.33  | 0.15 | 2.78E-02 |
| IL2RA       | 8  | -0.02 | 0.08 | 7.66E-01 |
| IL32        | 7  | -0.06 | 0.15 | 6.90E-01 |
| IL33        | 1  | -1.95 | 0.84 | 2.09E-02 |
| IL34        | 1  | 0.13  | 0.06 | 3.57E-02 |
| IL3RA       | 4  | 0.19  | 0.29 | 5.19E-01 |
| IL4R        | 5  | 0.02  | 0.12 | 8.86E-01 |
| IL5RA       | 22 | 0.01  | 0.09 | 9.46E-01 |
| IL6         | 4  | 0.30  | 0.18 | 9.00E-02 |
| IL6R        | 5  | 0.11  | 0.04 | 5.88E-03 |
| IL6ST       | 11 | 0.35  | 0.11 | 2.31E-03 |
| IL7         | 3  | -0.14 | 0.35 | 6.81E-01 |
| IL7R        | 10 | 0.04  | 0.05 | 4.16E-01 |
| ILKAP       | 1  | -0.61 | 0.76 | 4.27E-01 |
| IMPA1       | 2  | 0.09  | 0.22 | 6.75E-01 |
| ING1        | 1  | -0.66 | 0.83 | 4.27E-01 |
| INHBC       | 6  | 0.00  | 0.08 | 9.60E-01 |
| INPP1       | 3  | 0.75  | 0.33 | 2.27E-02 |
| IPCEF1      | 2  | -0.31 | 0.42 | 4.61E-01 |
| IQGAP2      | 1  | 0.30  | 0.31 | 3.36E-01 |
| IRAG2       | 1  | 1.10  | 0.67 | 1.02E-01 |
| IRAK1       | 1  | -0.03 | 0.78 | 9.73E-01 |
| IRAK4       | 1  | 0.83  | 0.61 | 1.74E-01 |
| ISLR2       | 7  | 0.26  | 0.08 | 9.13E-04 |
| ISM1        | 1  | 0.03  | 0.26 | 9.17E-01 |
| ITGA11      | 4  | -0.29 | 0.16 | 7.86E-02 |
| ITGA5       | 9  | -0.19 | 0.18 | 3.05E-01 |

|          |    |       |      |          |
|----------|----|-------|------|----------|
| ITGA6    | 3  | 0.44  | 0.17 | 9.56E-03 |
| ITGAM    | 10 | 0.12  | 0.15 | 4.32E-01 |
| ITGAV    | 6  | 0.14  | 0.20 | 4.81E-01 |
| ITGB1    | 6  | 0.68  | 0.20 | 4.97E-04 |
| ITGB1BP2 | 4  | 0.01  | 0.32 | 9.87E-01 |
| ITGB2    | 10 | -0.07 | 0.15 | 6.39E-01 |
| ITGB5    | 5  | 0.40  | 0.28 | 1.52E-01 |
| ITGB6    | 9  | 0.61  | 0.14 | 9.75E-06 |
| ITGB7    | 16 | -0.14 | 0.08 | 7.37E-02 |
| ITIH3    | 7  | 0.00  | 0.12 | 9.90E-01 |
| ITM2A    | 1  | -0.22 | 0.20 | 2.76E-01 |
| JAM2     | 4  | 0.07  | 0.25 | 7.72E-01 |
| JCHAIN   | 12 | 0.08  | 0.20 | 7.00E-01 |
| KAZALD1  | 3  | 0.07  | 0.45 | 8.70E-01 |
| KDR      | 11 | 0.11  | 0.08 | 1.78E-01 |
| KEL      | 14 | 0.32  | 0.09 | 2.03E-04 |
| KIFBP    | 3  | 0.44  | 0.30 | 1.45E-01 |
| KIR2DL3  | 2  | -1.82 | 0.46 | 7.23E-05 |
| KIR3DL1  | 2  | -0.04 | 0.05 | 4.23E-01 |
| KIRREL2  | 7  | 0.02  | 0.11 | 8.56E-01 |
| KIT      | 18 | -0.06 | 0.12 | 6.06E-01 |
| KITLG    | 15 | 0.17  | 0.11 | 1.41E-01 |
| KLB      | 7  | 0.05  | 0.06 | 4.06E-01 |
| KLK1     | 12 | -0.19 | 0.05 | 7.83E-05 |
| KLK10    | 3  | -0.03 | 0.08 | 7.27E-01 |
| KLK11    | 2  | 0.39  | 0.49 | 4.24E-01 |
| KLK12    | 5  | -0.06 | 0.04 | 9.55E-02 |
| KLK13    | 10 | 0.00  | 0.09 | 9.93E-01 |
| KLK14    | 9  | 0.01  | 0.11 | 8.87E-01 |
| KLK4     | 3  | 0.15  | 0.11 | 1.56E-01 |
| KLK6     | 2  | 0.02  | 0.23 | 9.32E-01 |
| KLK8     | 3  | -0.02 | 0.10 | 8.62E-01 |
| KLRB1    | 10 | -0.69 | 0.17 | 4.56E-05 |
| KLRD1    | 10 | -0.15 | 0.08 | 7.28E-02 |
| KRT18    | 6  | -0.01 | 0.30 | 9.75E-01 |
| KRT19    | 3  | 0.44  | 0.27 | 1.04E-01 |
| KRT5     | 4  | -0.24 | 0.22 | 2.76E-01 |
| KYAT1    | 4  | -0.32 | 0.32 | 3.23E-01 |
| KYNU     | 3  | 0.39  | 0.17 | 2.07E-02 |
| L1CAM    | 6  | 0.28  | 0.18 | 1.13E-01 |
| LACTB2   | 3  | 0.10  | 0.22 | 6.54E-01 |
| LAG3     | 10 | -0.26 | 0.14 | 6.59E-02 |
| LAIR1    | 3  | -2.29 | 0.52 | 1.18E-05 |
| LAIR2    | 3  | 0.01  | 0.06 | 8.78E-01 |
| LAMA4    | 11 | 0.07  | 0.14 | 6.17E-01 |
| LAMP2    | 2  | 0.88  | 0.56 | 1.18E-01 |
| LAMP3    | 8  | -0.28 | 0.27 | 2.97E-01 |
| LAT      | 5  | -0.36 | 0.29 | 2.21E-01 |
| LAT2     | 1  | -0.02 | 0.71 | 9.73E-01 |
| LAYN     | 3  | -0.03 | 0.11 | 8.02E-01 |
| LBP      | 2  | -0.02 | 0.07 | 8.16E-01 |
| LBR      | 5  | 0.11  | 0.22 | 6.22E-01 |
| LCN2     | 16 | 0.12  | 0.15 | 4.26E-01 |
| LDLR     | 15 | -0.51 | 0.15 | 7.53E-04 |
| LEFTY2   | 3  | 2.64  | 0.44 | 1.24E-09 |
| LEP      | 1  | -0.56 | 1.01 | 5.77E-01 |
| LEPR     | 9  | -0.19 | 0.14 | 1.80E-01 |
| LGALS1   | 2  | 0.26  | 0.16 | 1.01E-01 |
| LGALS3   | 4  | -0.86 | 0.32 | 6.63E-03 |



|                |    |       |      |          |
|----------------|----|-------|------|----------|
| LGALS4         | 3  | 0.17  | 0.09 | 5.27E-02 |
| LGALS7_LGALS7B | 6  | -0.38 | 0.11 | 7.78E-04 |
| LGALS8         | 6  | 0.19  | 0.09 | 3.98E-02 |
| LGALS9         | 3  | -1.73 | 0.32 | 7.04E-08 |
| LGMN           | 19 | 0.08  | 0.12 | 5.24E-01 |
| LHB            | 1  | -0.91 | 0.51 | 7.37E-02 |
| LIFR           | 10 | 0.33  | 0.11 | 1.91E-03 |
| LILRA2         | 11 | -0.05 | 0.07 | 4.96E-01 |
| LILRA5         | 9  | 0.16  | 0.18 | 3.51E-01 |
| LILRB1         | 7  | 0.13  | 0.07 | 7.58E-02 |
| LILRB2         | 9  | 0.05  | 0.05 | 2.75E-01 |
| LILRB4         | 2  | -2.13 | 0.52 | 3.53E-05 |
| LILRB5         | 2  | -0.02 | 0.04 | 6.67E-01 |
| LPCAT2         | 1  | -0.68 | 0.40 | 9.16E-02 |
| LPL            | 6  | 0.06  | 0.11 | 5.96E-01 |
| LPO            | 13 | -0.04 | 0.09 | 6.42E-01 |
| LRIG1          | 10 | -0.05 | 0.05 | 4.07E-01 |
| LRP1           | 10 | -0.13 | 0.17 | 4.31E-01 |
| LRP11          | 6  | 0.06  | 0.07 | 3.83E-01 |
| LRPAP1         | 7  | -0.23 | 0.06 | 1.23E-04 |
| LRRC25         | 12 | -0.08 | 0.09 | 3.73E-01 |
| LRRN1          | 6  | 0.07  | 0.06 | 2.10E-01 |
| LSP1           | 2  | -0.43 | 0.29 | 1.36E-01 |
| LTA            | 8  | -0.02 | 0.06 | 6.96E-01 |
| LTA4H          | 1  | -0.13 | 0.46 | 7.69E-01 |
| LTBP2          | 8  | 0.34  | 0.22 | 1.22E-01 |
| LTBP3          | 5  | -0.18 | 0.09 | 3.98E-02 |
| LTBR           | 13 | -0.33 | 0.10 | 9.82E-04 |
| LXN            | 1  | 0.70  | 0.26 | 7.54E-03 |
| LY6D           | 5  | 0.01  | 0.10 | 9.33E-01 |
| LY75           | 6  | 0.04  | 0.05 | 3.99E-01 |
| LY9            | 11 | -0.08 | 0.08 | 3.19E-01 |
| LY96           | 10 | -0.31 | 0.20 | 1.14E-01 |
| LYAR           | 1  | 0.12  | 0.84 | 8.88E-01 |
| LYN            | 5  | -0.06 | 0.35 | 8.59E-01 |
| LYPD3          | 17 | -0.01 | 0.08 | 8.60E-01 |
| LYPD8          | 7  | 0.06  | 0.08 | 4.71E-01 |
| MAD1L1         | 1  | -0.06 | 0.35 | 8.57E-01 |
| MAGED1         | 2  | 0.76  | 0.45 | 9.32E-02 |
| MANF           | 6  | 0.34  | 0.31 | 2.68E-01 |
| MANSC1         | 12 | 0.13  | 0.18 | 4.49E-01 |
| MAP2K6         | 2  | 1.03  | 0.51 | 4.46E-02 |
| MAP3K5         | 1  | -0.03 | 0.80 | 9.73E-01 |
| MAP4K5         | 3  | -0.17 | 0.23 | 4.58E-01 |
| MARCO          | 9  | -0.06 | 0.12 | 6.09E-01 |
| MASP1          | 10 | -0.04 | 0.11 | 7.22E-01 |
| MATN2          | 5  | 0.20  | 0.10 | 3.84E-02 |
| MATN3          | 3  | 0.18  | 0.08 | 2.06E-02 |
| MAVS           | 3  | 0.20  | 0.38 | 5.98E-01 |
| MAX            | 5  | 0.23  | 0.33 | 4.88E-01 |
| MB             | 8  | -0.01 | 0.29 | 9.65E-01 |
| MCAM           | 8  | 0.11  | 0.15 | 4.76E-01 |
| MCFD2          | 4  | -0.34 | 0.24 | 1.47E-01 |
| MDGA1          | 6  | -0.01 | 0.04 | 8.53E-01 |
| MDK            | 13 | -0.28 | 0.17 | 9.38E-02 |
| MED18          | 1  | 0.60  | 0.77 | 4.37E-01 |
| MEGF10         | 11 | 0.02  | 0.14 | 8.98E-01 |
| MEGF9          | 11 | -0.02 | 0.11 | 8.24E-01 |
| MEP1B          | 14 | -0.05 | 0.04 | 1.82E-01 |

|           |    |       |      |          |
|-----------|----|-------|------|----------|
| MEPE      | 11 | 0.37  | 0.18 | 4.06E-02 |
| MERTK     | 12 | 0.24  | 0.13 | 5.93E-02 |
| MESD      | 4  | -0.11 | 0.35 | 7.63E-01 |
| MET       | 17 | 0.23  | 0.11 | 3.56E-02 |
| METAP1D   | 3  | -0.85 | 0.42 | 4.52E-02 |
| METAP2    | 4  | -0.28 | 0.28 | 3.30E-01 |
| MFAP5     | 4  | 0.41  | 0.19 | 3.66E-02 |
| MFGE8     | 11 | 0.08  | 0.10 | 4.42E-01 |
| MGLL      | 3  | -0.01 | 0.39 | 9.85E-01 |
| MGMT      | 3  | 0.04  | 0.11 | 6.82E-01 |
| MIA       | 5  | 0.12  | 0.06 | 3.91E-02 |
| MICB_MICA | 8  | -0.04 | 0.05 | 4.19E-01 |
| MIF       | 3  | -0.12 | 0.33 | 7.04E-01 |
| MILR1     | 8  | 0.00  | 0.10 | 9.72E-01 |
| MITD1     | 2  | -0.40 | 0.49 | 4.16E-01 |
| MLN       | 13 | 0.07  | 0.17 | 6.99E-01 |
| MME       | 13 | -0.09 | 0.08 | 2.68E-01 |
| MMP1      | 10 | -0.08 | 0.09 | 3.96E-01 |
| MMP10     | 2  | -0.10 | 0.14 | 4.44E-01 |
| MMP12     | 2  | -0.08 | 0.09 | 3.74E-01 |
| MMP13     | 1  | 0.00  | 0.32 | 9.89E-01 |
| MMP3      | 4  | 0.07  | 0.09 | 4.35E-01 |
| MMP7      | 5  | 0.09  | 0.14 | 5.22E-01 |
| MMP8      | 2  | 0.04  | 0.11 | 6.89E-01 |
| MMP9      | 9  | 0.18  | 0.15 | 2.47E-01 |
| MNDA      | 1  | -0.24 | 0.90 | 7.91E-01 |
| MOG       | 2  | -0.30 | 0.22 | 1.68E-01 |
| MPHOSPH8  | 2  | -0.29 | 0.48 | 5.52E-01 |
| MPI       | 4  | -0.48 | 0.19 | 1.29E-02 |
| MPIG6B    | 4  | -0.08 | 0.29 | 7.98E-01 |
| MPO       | 6  | -0.20 | 0.29 | 4.92E-01 |
| MSLN      | 7  | -0.23 | 0.07 | 1.16E-03 |
| MSMB      | 5  | 0.00  | 0.05 | 9.86E-01 |
| MSR1      | 11 | 0.05  | 0.10 | 6.17E-01 |
| MSRA      | 2  | 0.91  | 0.54 | 8.96E-02 |
| MSTN      | 6  | 0.11  | 0.31 | 7.16E-01 |
| MUC13     | 4  | 0.28  | 0.15 | 5.52E-02 |
| MUC16     | 1  | -0.47 | 0.66 | 4.73E-01 |
| MVK       | 1  | -0.20 | 0.53 | 7.01E-01 |
| MYOC      | 9  | 0.30  | 0.14 | 2.48E-02 |
| MZB1      | 7  | -0.07 | 0.22 | 7.58E-01 |
| MZT1      | 2  | 0.53  | 0.57 | 3.59E-01 |
| NAAA      | 15 | 0.10  | 0.06 | 1.31E-01 |
| NADK      | 5  | -0.26 | 0.14 | 6.58E-02 |
| NBL1      | 3  | -0.41 | 0.33 | 2.16E-01 |
| NBN       | 3  | 0.09  | 0.38 | 8.11E-01 |
| NCAM1     | 7  | 0.07  | 0.14 | 6.10E-01 |
| NCAM2     | 5  | -0.22 | 0.19 | 2.42E-01 |
| NCAN      | 9  | 0.20  | 0.18 | 2.82E-01 |
| NCF2      | 4  | -0.01 | 0.18 | 9.36E-01 |
| NCK2      | 1  | -1.58 | 0.89 | 7.49E-02 |
| NCR1      | 22 | -0.29 | 0.10 | 5.24E-03 |
| NCS1      | 7  | 0.08  | 0.25 | 7.34E-01 |
| NECTIN2   | 4  | 0.28  | 0.18 | 1.23E-01 |
| NECTIN4   | 6  | -0.23 | 0.14 | 9.19E-02 |
| NEFL      | 2  | -0.93 | 0.70 | 1.85E-01 |
| NELL1     | 16 | -0.10 | 0.09 | 2.73E-01 |
| NELL2     | 13 | 0.19  | 0.18 | 2.79E-01 |
| NFASC     | 4  | 0.13  | 0.11 | 2.23E-01 |

|          |    |       |      |          |
|----------|----|-------|------|----------|
| NFATC1   | 2  | 0.23  | 0.37 | 5.37E-01 |
| NFATC3   | 1  | -0.63 | 0.76 | 4.04E-01 |
| NFKBIE   | 2  | 0.13  | 0.20 | 5.04E-01 |
| NID1     | 9  | -0.07 | 0.15 | 6.28E-01 |
| NID2     | 12 | 0.08  | 0.07 | 2.59E-01 |
| NINJ1    | 1  | -0.56 | 0.64 | 3.81E-01 |
| NME3     | 12 | 0.05  | 0.11 | 6.55E-01 |
| NMNAT1   | 4  | 0.09  | 0.16 | 5.72E-01 |
| NOMO1    | 3  | -0.80 | 0.31 | 8.96E-03 |
| NOS1     | 1  | 0.56  | 0.71 | 4.31E-01 |
| NOS3     | 2  | -0.73 | 0.53 | 1.64E-01 |
| NOTCH1   | 7  | 0.03  | 0.14 | 8.52E-01 |
| NOTCH3   | 11 | 0.39  | 0.19 | 3.87E-02 |
| NPDC1    | 5  | -0.72 | 0.35 | 4.08E-02 |
| NPPB     | 2  | 0.88  | 0.24 | 2.01E-04 |
| NPPC     | 2  | 1.07  | 0.67 | 1.09E-01 |
| NPTX1    | 12 | 0.00  | 0.08 | 9.49E-01 |
| NPTXR    | 3  | 0.01  | 0.08 | 9.48E-01 |
| NPY      | 9  | -0.32 | 0.18 | 7.84E-02 |
| NRCAM    | 7  | 0.16  | 0.22 | 4.46E-01 |
| NRP1     | 6  | 0.14  | 0.13 | 3.02E-01 |
| NRP2     | 9  | 0.09  | 0.19 | 6.48E-01 |
| NRTN     | 1  | -0.50 | 0.81 | 5.38E-01 |
| NSFL1C   | 2  | 0.33  | 0.44 | 4.51E-01 |
| NT5C3A   | 4  | -0.76 | 0.31 | 1.61E-02 |
| NT5E     | 8  | 0.04  | 0.08 | 6.22E-01 |
| NTF3     | 4  | -0.31 | 0.21 | 1.36E-01 |
| NTF4     | 1  | 0.87  | 0.86 | 3.08E-01 |
| NTproBNP | 4  | 0.55  | 0.16 | 5.19E-04 |
| NTRK2    | 7  | 0.18  | 0.25 | 4.77E-01 |
| NTRK3    | 9  | 0.45  | 0.16 | 5.15E-03 |
| NUB1     | 4  | -0.02 | 0.21 | 9.34E-01 |
| NUCB2    | 5  | -0.02 | 0.11 | 8.59E-01 |
| NUDC     | 2  | 0.57  | 0.45 | 2.02E-01 |
| NUDT2    | 2  | -0.23 | 0.18 | 1.89E-01 |
| NUDT5    | 2  | -0.08 | 0.51 | 8.79E-01 |
| OBP2B    | 11 | 0.08  | 0.08 | 3.06E-01 |
| ODAM     | 2  | 0.05  | 0.17 | 7.85E-01 |
| OGFR     | 2  | -0.23 | 0.33 | 4.86E-01 |
| OGN      | 4  | 0.17  | 0.08 | 2.57E-02 |
| OLR1     | 6  | 0.04  | 0.24 | 8.67E-01 |
| OMD      | 5  | -0.24 | 0.23 | 2.98E-01 |
| OMG      | 8  | 0.43  | 0.20 | 3.45E-02 |
| OPTC     | 7  | 0.10  | 0.15 | 5.05E-01 |
| OSCAR    | 8  | -0.04 | 0.08 | 5.93E-01 |
| OSM      | 8  | 0.02  | 0.17 | 9.13E-01 |
| OSMR     | 5  | 0.09  | 0.08 | 2.84E-01 |
| OXT      | 9  | -0.08 | 0.08 | 3.17E-01 |
| P4HB     | 3  | -0.55 | 0.42 | 1.95E-01 |
| PADI2    | 1  | -0.20 | 0.36 | 5.88E-01 |
| PADI4    | 1  | 0.15  | 0.17 | 3.86E-01 |
| PAEP     | 3  | -0.10 | 0.06 | 1.36E-01 |
| PAG1     | 6  | -1.06 | 0.26 | 4.16E-05 |
| PAK4     | 1  | -0.03 | 0.86 | 9.73E-01 |
| PAM      | 4  | -0.03 | 0.09 | 7.19E-01 |
| PAMR1    | 4  | 0.24  | 0.11 | 3.69E-02 |
| PAPPA    | 11 | 0.07  | 0.15 | 6.52E-01 |
| PARK7    | 5  | 0.08  | 0.23 | 7.17E-01 |
| PARP1    | 2  | 0.08  | 0.26 | 7.50E-01 |

|          |    |       |      |          |
|----------|----|-------|------|----------|
| PCDH1    | 5  | -0.37 | 0.26 | 1.44E-01 |
| PCDH17   | 8  | -0.12 | 0.09 | 1.90E-01 |
| PCOLCE   | 1  | -0.19 | 0.27 | 4.86E-01 |
| PCSK9    | 8  | -0.10 | 0.13 | 4.34E-01 |
| PDCD1    | 10 | 0.21  | 0.22 | 3.26E-01 |
| PDCD1LG2 | 8  | 0.04  | 0.06 | 5.28E-01 |
| PDCD5    | 2  | -0.01 | 0.12 | 9.42E-01 |
| PDCD6    | 4  | 0.05  | 0.04 | 2.70E-01 |
| PDGFA    | 16 | -0.14 | 0.13 | 2.73E-01 |
| PDGFB    | 13 | -0.23 | 0.15 | 1.22E-01 |
| PDGFC    | 4  | -0.30 | 0.15 | 4.53E-02 |
| PDGFRA   | 10 | 0.13  | 0.13 | 3.24E-01 |
| PDGFRB   | 2  | 0.03  | 0.04 | 4.01E-01 |
| PDLIM7   | 3  | 0.50  | 0.40 | 2.11E-01 |
| PEAR1    | 7  | -0.33 | 0.16 | 3.70E-02 |
| PEBP1    | 2  | 0.14  | 0.57 | 8.10E-01 |
| PECAM1   | 7  | 0.29  | 0.09 | 1.29E-03 |
| PFKFB2   | 4  | -0.12 | 0.21 | 5.62E-01 |
| PGF      | 3  | -0.13 | 0.42 | 7.60E-01 |
| PGLYRP1  | 11 | -0.04 | 0.13 | 7.24E-01 |
| PI3      | 4  | -0.38 | 0.15 | 1.24E-02 |
| PIGR     | 6  | 0.28  | 0.20 | 1.64E-01 |
| PIK3AP1  | 6  | 0.08  | 0.19 | 6.87E-01 |
| PIK3IP1  | 3  | 0.14  | 0.15 | 3.61E-01 |
| PILRA    | 6  | -0.04 | 0.05 | 4.37E-01 |
| PILRB    | 4  | -0.03 | 0.04 | 4.54E-01 |
| PKLR     | 4  | 0.37  | 0.22 | 8.56E-02 |
| PLA2G10  | 13 | 0.35  | 0.10 | 3.23E-04 |
| PLA2G15  | 8  | 0.18  | 0.12 | 1.41E-01 |
| PLA2G1B  | 17 | 0.11  | 0.14 | 4.48E-01 |
| PLA2G2A  | 6  | 0.11  | 0.07 | 1.05E-01 |
| PLA2G4A  | 2  | 0.06  | 0.54 | 9.07E-01 |
| PLA2G7   | 9  | -0.47 | 0.21 | 2.63E-02 |
| PLAT     | 4  | -1.01 | 0.34 | 2.68E-03 |
| PLAU     | 8  | 0.18  | 0.13 | 1.50E-01 |
| PLAUR    | 9  | -0.07 | 0.16 | 6.61E-01 |
| PLIN1    | 1  | -0.80 | 0.54 | 1.37E-01 |
| PLIN3    | 2  | -0.24 | 0.51 | 6.41E-01 |
| PLPBP    | 2  | -0.27 | 0.50 | 5.87E-01 |
| PLTP     | 11 | 0.22  | 0.09 | 1.54E-02 |
| PLXDC1   | 3  | -0.16 | 0.18 | 3.68E-01 |
| PLXNA4   | 5  | -0.23 | 0.24 | 3.38E-01 |
| PLXNB2   | 11 | 0.04  | 0.06 | 5.08E-01 |
| PLXNB3   | 5  | -0.37 | 0.35 | 2.97E-01 |
| PM20D1   | 6  | 0.59  | 0.27 | 2.95E-02 |
| PMVK     | 6  | -0.01 | 0.26 | 9.60E-01 |
| PNLIPRP2 | 7  | -0.01 | 0.04 | 7.33E-01 |
| PNPT1    | 2  | -0.54 | 0.49 | 2.71E-01 |
| PODXL    | 6  | 0.28  | 0.08 | 3.97E-04 |
| PODXL2   | 11 | 0.10  | 0.18 | 5.81E-01 |
| POLR2F   | 1  | -4.42 | 0.86 | 2.41E-07 |
| PON2     | 3  | 0.04  | 0.06 | 4.65E-01 |
| PON3     | 9  | 0.33  | 0.11 | 4.04E-03 |
| PPCDC    | 2  | 0.01  | 0.13 | 9.45E-01 |
| PIIB     | 3  | -0.48 | 0.44 | 2.72E-01 |
| PPME1    | 1  | 0.68  | 0.85 | 4.26E-01 |
| PPP1R12A | 3  | 0.27  | 0.45 | 5.45E-01 |
| PPP1R2   | 3  | -0.04 | 0.41 | 9.24E-01 |
| PPP1R9B  | 2  | 0.65  | 0.53 | 2.24E-01 |

|          |    |       |      |          |
|----------|----|-------|------|----------|
| PPP3R1   | 4  | -0.10 | 0.30 | 7.38E-01 |
| PPY      | 6  | 0.53  | 0.19 | 4.36E-03 |
| PRCP     | 12 | 0.08  | 0.12 | 5.34E-01 |
| PRDX1    | 2  | -0.48 | 0.49 | 3.25E-01 |
| PRDX3    | 1  | -0.63 | 0.71 | 3.70E-01 |
| PRDX5    | 2  | 0.18  | 0.29 | 5.38E-01 |
| PRDX6    | 1  | -0.23 | 0.32 | 4.78E-01 |
| PRELP    | 1  | -0.07 | 0.10 | 4.51E-01 |
| PRKAB1   | 1  | -0.03 | 0.84 | 9.73E-01 |
| PRKARIA  | 4  | 0.62  | 0.35 | 8.14E-02 |
| PRKRA    | 1  | -0.01 | 0.44 | 9.73E-01 |
| PRL      | 3  | 0.05  | 0.41 | 9.11E-01 |
| PROC     | 7  | -0.04 | 0.16 | 7.88E-01 |
| PROK1    | 2  | 0.00  | 0.13 | 9.93E-01 |
| PRSS2    | 11 | 0.17  | 0.16 | 2.84E-01 |
| PRSS27   | 16 | -0.23 | 0.06 | 4.67E-04 |
| PRSS8    | 7  | -0.03 | 0.22 | 9.05E-01 |
| PRTFDC1  | 3  | -0.14 | 0.21 | 5.11E-01 |
| PRTG     | 8  | -0.03 | 0.09 | 7.32E-01 |
| PRTN3    | 12 | -0.32 | 0.19 | 9.11E-02 |
| PSG1     | 6  | -0.18 | 0.28 | 5.27E-01 |
| PSIP1    | 2  | 0.23  | 0.33 | 4.80E-01 |
| PSME1    | 2  | 0.16  | 0.45 | 7.30E-01 |
| PSME2    | 1  | 0.22  | 0.50 | 6.63E-01 |
| PSMG3    | 1  | -1.25 | 0.89 | 1.60E-01 |
| PSPN     | 7  | -0.17 | 0.34 | 6.04E-01 |
| PSRC1    | 2  | 0.24  | 0.25 | 3.33E-01 |
| PTGDS    | 2  | -0.59 | 0.61 | 3.40E-01 |
| PTH1R    | 1  | -0.10 | 0.19 | 5.88E-01 |
| PTN      | 3  | 0.46  | 0.26 | 8.11E-02 |
| PTPN1    | 2  | 0.49  | 0.45 | 2.72E-01 |
| PTPN6    | 2  | 0.76  | 0.48 | 1.09E-01 |
| PTPRF    | 12 | 0.28  | 0.15 | 6.43E-02 |
| PTPRM    | 8  | 0.26  | 0.08 | 7.58E-04 |
| PTPRN2   | 1  | 0.15  | 0.29 | 6.12E-01 |
| PTPRS    | 5  | -0.01 | 0.15 | 9.72E-01 |
| PTS      | 4  | 0.09  | 0.19 | 6.27E-01 |
| PTX3     | 5  | -0.01 | 0.12 | 9.59E-01 |
| PVALB    | 6  | 0.00  | 0.06 | 9.96E-01 |
| PVR      | 2  | -0.06 | 0.07 | 3.35E-01 |
| PXN      | 3  | 0.01  | 0.07 | 8.69E-01 |
| QDPR     | 1  | -0.02 | 0.73 | 9.73E-01 |
| QPCT     | 11 | 0.03  | 0.12 | 8.29E-01 |
| RABEPK   | 1  | -0.19 | 0.30 | 5.35E-01 |
| RABGAP1L | 2  | 0.06  | 0.47 | 9.04E-01 |
| RAD23B   | 3  | -0.36 | 0.45 | 4.22E-01 |
| RARRES1  | 1  | -0.24 | 0.10 | 1.21E-02 |
| RARRES2  | 3  | 0.40  | 0.21 | 5.96E-02 |
| RASSF2   | 1  | -0.38 | 0.48 | 4.24E-01 |
| RBKS     | 1  | 0.02  | 0.12 | 8.89E-01 |
| RBP2     | 4  | 0.03  | 0.31 | 9.29E-01 |
| RBP5     | 3  | -0.04 | 0.15 | 7.91E-01 |
| RCOR1    | 1  | -1.18 | 0.76 | 1.20E-01 |
| REG1A    | 6  | 0.02  | 0.11 | 8.44E-01 |
| REG1B    | 7  | 0.04  | 0.10 | 7.05E-01 |
| REG3A    | 8  | -0.20 | 0.14 | 1.68E-01 |
| REG4     | 2  | 0.30  | 0.25 | 2.37E-01 |
| RELT     | 4  | -0.09 | 0.13 | 4.86E-01 |
| REN      | 2  | 0.31  | 0.29 | 2.81E-01 |

|           |    |       |      |          |
|-----------|----|-------|------|----------|
| RET       | 8  | -0.22 | 0.11 | 4.21E-02 |
| RETN      | 15 | -0.08 | 0.12 | 4.69E-01 |
| RGMA      | 17 | 0.05  | 0.10 | 6.60E-01 |
| RGMB      | 4  | -0.27 | 0.22 | 2.23E-01 |
| RGS8      | 1  | -0.09 | 0.26 | 7.21E-01 |
| RHOC      | 3  | 0.60  | 0.52 | 2.52E-01 |
| RILP      | 3  | -0.25 | 0.39 | 5.25E-01 |
| RNASE3    | 4  | 0.10  | 0.17 | 5.44E-01 |
| RNASET2   | 7  | 0.07  | 0.10 | 5.08E-01 |
| ROBO1     | 8  | 0.20  | 0.16 | 2.14E-01 |
| ROBO2     | 5  | -0.15 | 0.27 | 5.82E-01 |
| ROR1      | 12 | 0.06  | 0.12 | 6.31E-01 |
| RP2       | 2  | -6.12 | 0.39 | 4.29E-56 |
| RRM2      | 1  | -0.82 | 0.75 | 2.71E-01 |
| RRM2B     | 1  | -0.02 | 0.49 | 9.73E-01 |
| RSPO1     | 8  | -0.01 | 0.15 | 9.64E-01 |
| RSPO3     | 8  | -0.57 | 0.20 | 4.27E-03 |
| RTBDN     | 2  | 0.28  | 0.27 | 3.02E-01 |
| RTN4R     | 9  | -0.01 | 0.14 | 9.16E-01 |
| RUVBL1    | 1  | -0.08 | 0.20 | 6.85E-01 |
| RWDD1     | 2  | 0.15  | 0.30 | 6.13E-01 |
| S100A11   | 2  | 0.08  | 0.20 | 6.81E-01 |
| S100A12   | 4  | 0.02  | 0.17 | 8.82E-01 |
| S100A16   | 3  | 0.91  | 0.31 | 3.15E-03 |
| S100A4    | 4  | -0.24 | 0.42 | 5.62E-01 |
| S100P     | 5  | 1.11  | 0.28 | 7.08E-05 |
| SAMD9L    | 2  | 0.00  | 0.15 | 9.86E-01 |
| SCAMP3    | 4  | 0.38  | 0.32 | 2.41E-01 |
| SCARA5    | 6  | 0.01  | 0.14 | 9.24E-01 |
| SCARB1    | 1  | -0.25 | 0.84 | 7.68E-01 |
| SCARB2    | 4  | 0.19  | 0.18 | 2.96E-01 |
| SCARF1    | 7  | -0.18 | 0.11 | 9.12E-02 |
| SCARF2    | 8  | 0.02  | 0.13 | 8.83E-01 |
| SCG2      | 4  | -0.32 | 0.36 | 3.71E-01 |
| SCG3      | 5  | 0.02  | 0.07 | 7.41E-01 |
| SCGB1A1   | 15 | 0.01  | 0.11 | 9.01E-01 |
| SCGB3A2   | 15 | 0.24  | 0.13 | 6.10E-02 |
| SCGN      | 3  | 0.77  | 0.23 | 8.74E-04 |
| SCLY      | 6  | 0.17  | 0.34 | 6.25E-01 |
| SCP2      | 1  | -1.65 | 0.84 | 5.12E-02 |
| SCRN1     | 2  | 0.21  | 0.32 | 5.20E-01 |
| SDC1      | 13 | -0.17 | 0.14 | 2.23E-01 |
| SDC4      | 20 | 0.07  | 0.11 | 5.43E-01 |
| SELE      | 9  | 0.19  | 0.06 | 7.73E-04 |
| SELP      | 10 | 0.16  | 0.12 | 1.75E-01 |
| SELPLG    | 10 | 0.12  | 0.08 | 1.29E-01 |
| SEMA3F    | 5  | 0.04  | 0.31 | 8.90E-01 |
| SEMA4C    | 5  | 0.64  | 0.19 | 7.12E-04 |
| SEMA4D    | 6  | -0.27 | 0.26 | 2.90E-01 |
| SEMA7A    | 17 | -0.27 | 0.12 | 3.22E-02 |
| SEPTIN9   | 2  | 0.29  | 0.41 | 4.86E-01 |
| SERPINA11 | 8  | 0.13  | 0.07 | 6.91E-02 |
| SERPINA12 | 5  | 0.05  | 0.07 | 4.24E-01 |
| SERPINA9  | 3  | 0.11  | 0.10 | 2.71E-01 |
| SERPINB1  | 3  | -0.32 | 0.37 | 3.85E-01 |
| SERPINB6  | 1  | -0.62 | 0.79 | 4.27E-01 |
| SERPINB8  | 2  | 0.01  | 0.06 | 8.43E-01 |
| SERPINB9  | 2  | -0.35 | 0.35 | 3.08E-01 |
| SERPINE1  | 14 | -0.30 | 0.14 | 3.44E-02 |

|          |    |       |      |          |
|----------|----|-------|------|----------|
| SESTD1   | 3  | 0.20  | 0.35 | 5.60E-01 |
| SETMAR   | 2  | -0.27 | 0.20 | 1.76E-01 |
| SEZ6L    | 7  | -0.13 | 0.21 | 5.46E-01 |
| SEZ6L2   | 8  | 0.32  | 0.18 | 7.51E-02 |
| SF3B4    | 4  | -0.03 | 0.37 | 9.44E-01 |
| SFRP1    | 5  | 0.15  | 0.20 | 4.66E-01 |
| SFTPA1   | 1  | -0.01 | 0.20 | 9.65E-01 |
| SFTPA2   | 6  | 0.00  | 0.07 | 9.50E-01 |
| SFTPD    | 10 | 0.04  | 0.05 | 4.58E-01 |
| SH2B3    | 4  | -0.39 | 0.35 | 2.71E-01 |
| SH2D1A   | 2  | -1.41 | 0.38 | 2.03E-04 |
| SHMT1    | 4  | -0.02 | 0.06 | 7.01E-01 |
| SIAE     | 8  | -0.05 | 0.17 | 7.79E-01 |
| SIGLEC1  | 9  | -0.03 | 0.15 | 8.61E-01 |
| SIGLEC10 | 7  | -0.15 | 0.10 | 1.27E-01 |
| SIGLEC5  | 3  | -0.05 | 0.06 | 3.77E-01 |
| SIGLEC6  | 21 | -0.26 | 0.09 | 3.45E-03 |
| SIGLEC7  | 7  | -0.08 | 0.12 | 5.01E-01 |
| SIGLEC9  | 10 | 0.06  | 0.05 | 1.91E-01 |
| SIRPA    | 7  | 0.03  | 0.04 | 3.62E-01 |
| SIRPB1   | 11 | -0.02 | 0.07 | 7.45E-01 |
| SIRT2    | 3  | 0.42  | 0.27 | 1.16E-01 |
| SIT1     | 6  | -1.00 | 0.24 | 4.11E-05 |
| SKAP1    | 7  | 0.15  | 0.26 | 5.57E-01 |
| SKAP2    | 3  | -0.56 | 0.42 | 1.84E-01 |
| SLAMF1   | 3  | 0.50  | 0.27 | 6.37E-02 |
| SLAMF6   | 3  | -0.56 | 0.22 | 1.21E-02 |
| SLAMF7   | 7  | 0.14  | 0.07 | 2.90E-02 |
| SLAMF8   | 5  | 0.00  | 0.05 | 9.50E-01 |
| SLC16A1  | 4  | 0.02  | 0.27 | 9.39E-01 |
| SLC27A4  | 2  | -0.06 | 0.41 | 8.75E-01 |
| SLC39A14 | 2  | -0.57 | 0.34 | 9.13E-02 |
| SLC39A5  | 7  | -0.31 | 0.21 | 1.43E-01 |
| SLIT2    | 1  | -1.36 | 0.74 | 6.51E-02 |
| SLITRK2  | 11 | -0.18 | 0.18 | 3.20E-01 |
| SLITRK6  | 7  | 0.02  | 0.11 | 8.88E-01 |
| SMAD1    | 5  | 0.08  | 0.35 | 8.23E-01 |
| SMAD5    | 1  | -0.14 | 0.26 | 5.92E-01 |
| SMOC1    | 8  | -0.15 | 0.13 | 2.51E-01 |
| SMOC2    | 5  | -0.03 | 0.12 | 8.13E-01 |
| SMPD1    | 14 | 0.09  | 0.08 | 2.72E-01 |
| SMPDL3A  | 19 | 0.11  | 0.05 | 4.11E-02 |
| SNAP23   | 2  | -0.14 | 0.36 | 7.08E-01 |
| SNAP29   | 5  | -0.24 | 0.30 | 4.26E-01 |
| SNCG     | 1  | 0.03  | 0.05 | 4.87E-01 |
| SNX9     | 2  | 0.22  | 0.41 | 5.87E-01 |
| SOD1     | 3  | -0.05 | 0.36 | 8.83E-01 |
| SOD2     | 8  | 0.01  | 0.20 | 9.56E-01 |
| SORCS2   | 3  | 0.05  | 0.10 | 5.95E-01 |
| SORD     | 3  | 0.26  | 0.28 | 3.61E-01 |
| SORT1    | 12 | -0.25 | 0.14 | 6.48E-02 |
| SOST     | 12 | 0.15  | 0.15 | 3.40E-01 |
| SPARC    | 12 | -0.24 | 0.16 | 1.36E-01 |
| SPARCL1  | 4  | 0.01  | 0.06 | 8.87E-01 |
| SPINK1   | 2  | 0.13  | 0.11 | 2.24E-01 |
| SPINK4   | 5  | -0.18 | 0.05 | 1.13E-03 |
| SPINK5   | 6  | -0.40 | 0.17 | 1.83E-02 |
| SPINK6   | 1  | 0.09  | 0.12 | 4.86E-01 |
| SPINT1   | 8  | -0.02 | 0.12 | 8.38E-01 |

|         |    |       |      |          |
|---------|----|-------|------|----------|
| SPINT2  | 11 | -0.11 | 0.15 | 4.63E-01 |
| SPOCK1  | 11 | -0.14 | 0.19 | 4.55E-01 |
| SPON1   | 5  | 0.11  | 0.14 | 4.25E-01 |
| SPON2   | 1  | -0.35 | 0.22 | 9.94E-02 |
| SPP1    | 7  | 0.40  | 0.27 | 1.41E-01 |
| SPRY2   | 6  | 0.05  | 0.24 | 8.43E-01 |
| SRC     | 1  | -1.26 | 0.82 | 1.25E-01 |
| SRP14   | 2  | -0.79 | 0.37 | 3.48E-02 |
| SRPK2   | 3  | 0.42  | 0.33 | 2.06E-01 |
| SSC4D   | 11 | 0.00  | 0.11 | 9.91E-01 |
| SSC5D   | 10 | -0.03 | 0.16 | 8.53E-01 |
| ST3GAL1 | 7  | -0.22 | 0.14 | 1.13E-01 |
| ST6GAL1 | 5  | -0.37 | 0.36 | 3.10E-01 |
| STAMBP  | 3  | 0.07  | 0.44 | 8.67E-01 |
| STAT5B  | 3  | 0.39  | 0.43 | 3.64E-01 |
| STC1    | 5  | 0.76  | 0.25 | 2.66E-03 |
| STC2    | 4  | -1.67 | 0.40 | 3.13E-05 |
| STIP1   | 2  | -0.33 | 0.45 | 4.71E-01 |
| STK11   | 4  | 0.28  | 0.36 | 4.41E-01 |
| STK24   | 2  | -0.35 | 0.59 | 5.58E-01 |
| STK4    | 4  | -0.58 | 0.36 | 1.06E-01 |
| STX16   | 1  | -1.20 | 0.77 | 1.20E-01 |
| STX4    | 2  | 0.98  | 0.54 | 6.93E-02 |
| STX6    | 1  | 1.87  | 0.86 | 3.01E-02 |
| STX8    | 3  | -0.01 | 0.38 | 9.85E-01 |
| SUGT1   | 1  | -0.02 | 0.69 | 9.73E-01 |
| SULT1A1 | 1  | -0.77 | 0.45 | 9.03E-02 |
| SULT2A1 | 3  | 0.10  | 0.15 | 4.92E-01 |
| SUMF2   | 14 | -0.18 | 0.09 | 4.65E-02 |
| SUSD1   | 4  | -0.22 | 0.21 | 3.08E-01 |
| SUSD2   | 3  | 0.10  | 0.10 | 2.89E-01 |
| TACC3   | 4  | 0.14  | 0.32 | 6.60E-01 |
| TACSTD2 | 13 | 0.00  | 0.06 | 9.98E-01 |
| TAFA5   | 2  | 0.25  | 0.26 | 3.46E-01 |
| TARBP2  | 3  | 0.67  | 0.42 | 1.13E-01 |
| TBC1D17 | 1  | 0.20  | 0.11 | 6.80E-02 |
| TBC1D23 | 4  | 0.32  | 0.25 | 2.01E-01 |
| TBC1D5  | 2  | 0.70  | 0.54 | 1.92E-01 |
| TBCB    | 4  | 0.43  | 0.38 | 2.54E-01 |
| TBCC    | 4  | 0.01  | 0.26 | 9.73E-01 |
| TBL1X   | 5  | -0.21 | 0.25 | 4.14E-01 |
| TCL1A   | 17 | -0.15 | 0.11 | 1.88E-01 |
| TCN2    | 1  | 0.23  | 0.09 | 9.03E-03 |
| TDGF1   | 2  | 0.02  | 0.04 | 5.41E-01 |
| TDRKH   | 4  | -0.06 | 0.13 | 6.68E-01 |
| TEK     | 9  | 0.01  | 0.07 | 9.05E-01 |
| TFF1    | 5  | 0.21  | 0.13 | 1.02E-01 |
| TFF2    | 8  | 0.17  | 0.18 | 3.35E-01 |
| TFF3    | 3  | 0.46  | 0.12 | 2.47E-04 |
| TFPI    | 8  | -0.08 | 0.11 | 4.61E-01 |
| TFPI2   | 7  | 0.24  | 0.19 | 2.12E-01 |
| TFRC    | 9  | 0.43  | 0.15 | 4.32E-03 |
| TGFA    | 4  | -0.83 | 0.27 | 1.77E-03 |
| TGFB1   | 7  | -0.19 | 0.15 | 2.06E-01 |
| TGFBI   | 8  | 0.04  | 0.07 | 5.82E-01 |
| TGFBR2  | 7  | 0.62  | 0.23 | 5.86E-03 |
| TGFBR3  | 5  | 0.08  | 0.22 | 7.14E-01 |
| TGM2    | 2  | 0.02  | 0.25 | 9.29E-01 |
| THBD    | 14 | 0.09  | 0.14 | 5.06E-01 |



|           |    |       |      |          |
|-----------|----|-------|------|----------|
| THBS2     | 7  | 0.19  | 0.09 | 3.95E-02 |
| THBS4     | 5  | 0.12  | 0.13 | 3.47E-01 |
| THOP1     | 1  | -0.31 | 0.18 | 9.35E-02 |
| THPO      | 14 | -0.18 | 0.15 | 2.26E-01 |
| THY1      | 3  | 0.22  | 0.13 | 1.01E-01 |
| TIA1      | 2  | -0.36 | 0.44 | 4.16E-01 |
| TIE1      | 11 | -0.04 | 0.08 | 5.87E-01 |
| TIGAR     | 2  | -0.08 | 0.53 | 8.77E-01 |
| TIMD4     | 22 | -0.05 | 0.09 | 5.75E-01 |
| TIMP1     | 5  | -0.37 | 0.24 | 1.25E-01 |
| TIMP3     | 13 | 0.09  | 0.07 | 1.83E-01 |
| TIMP4     | 3  | -0.02 | 0.13 | 8.84E-01 |
| TINAGL1   | 8  | -0.53 | 0.20 | 7.52E-03 |
| TJAP1     | 1  | -0.02 | 0.70 | 9.73E-01 |
| TLR3      | 5  | 0.29  | 0.46 | 5.22E-01 |
| TMPRSS15  | 6  | 0.39  | 0.14 | 7.34E-03 |
| TMPRSS5   | 16 | 0.03  | 0.06 | 6.28E-01 |
| TMSB10    | 6  | -0.21 | 0.27 | 4.34E-01 |
| TNC       | 13 | 0.00  | 0.09 | 9.81E-01 |
| TNF       | 3  | -0.47 | 0.24 | 4.78E-02 |
| TNFAIP8   | 1  | 0.79  | 0.56 | 1.58E-01 |
| TNFRSF10A | 2  | -0.02 | 0.09 | 8.56E-01 |
| TNFRSF10B | 2  | 0.15  | 0.13 | 2.61E-01 |
| TNFRSF10C | 15 | 0.12  | 0.05 | 2.05E-02 |
| TNFRSF11A | 5  | -0.02 | 0.09 | 7.81E-01 |
| TNFRSF11B | 8  | 0.19  | 0.18 | 2.79E-01 |
| TNFRSF12A | 2  | -1.06 | 0.52 | 4.08E-02 |
| TNFRSF13B | 9  | -0.20 | 0.21 | 3.52E-01 |
| TNFRSF13C | 9  | -0.19 | 0.22 | 4.00E-01 |
| TNFRSF14  | 5  | 0.02  | 0.28 | 9.31E-01 |
| TNFRSF19  | 4  | 0.29  | 0.16 | 6.64E-02 |
| TNFRSF1A  | 7  | 0.53  | 0.24 | 2.83E-02 |
| TNFRSF1B  | 6  | -0.43 | 0.20 | 3.23E-02 |
| TNFRSF21  | 12 | -0.02 | 0.12 | 8.60E-01 |
| TNFRSF4   | 6  | -0.87 | 0.22 | 8.51E-05 |
| TNFRSF6B  | 3  | -0.14 | 0.14 | 3.26E-01 |
| TNFRSF8   | 7  | -0.78 | 0.16 | 1.30E-06 |
| TNFRSF9   | 5  | -0.46 | 0.21 | 3.07E-02 |
| TNFSF10   | 9  | -0.02 | 0.09 | 8.34E-01 |
| TNFSF11   | 7  | -0.09 | 0.14 | 5.42E-01 |
| TNFSF12   | 16 | 0.04  | 0.11 | 6.93E-01 |
| TNFSF13   | 7  | -0.27 | 0.13 | 2.90E-02 |
| TNFSF13B  | 4  | -0.09 | 0.28 | 7.32E-01 |
| TNFSF14   | 5  | 0.00  | 0.15 | 9.84E-01 |
| TNR       | 16 | -0.01 | 0.09 | 8.81E-01 |
| TNXB      | 6  | 0.22  | 0.10 | 2.90E-02 |
| TP53      | 1  | -0.65 | 0.75 | 3.91E-01 |
| TP53INP1  | 2  | -0.25 | 0.38 | 5.08E-01 |
| TPMT      | 2  | -0.09 | 0.09 | 3.41E-01 |
| TPP1      | 11 | -0.23 | 0.12 | 5.16E-02 |
| TPPP3     | 1  | 0.59  | 0.71 | 4.09E-01 |
| TPSAB1    | 13 | -0.01 | 0.05 | 8.61E-01 |
| TRAF2     | 3  | 0.05  | 0.44 | 9.12E-01 |
| TREM2     | 7  | 0.19  | 0.09 | 2.91E-02 |
| TREML2    | 7  | -0.03 | 0.15 | 8.62E-01 |
| TRIAP1    | 6  | 0.16  | 0.21 | 4.47E-01 |
| TRIM21    | 3  | 1.16  | 0.33 | 3.77E-04 |
| TRIM5     | 1  | 0.25  | 0.15 | 9.55E-02 |
| TSHB      | 14 | 0.06  | 0.15 | 7.08E-01 |

|         |    |       |      |          |
|---------|----|-------|------|----------|
| TSPAN1  | 2  | 1.01  | 0.58 | 8.29E-02 |
| TST     | 1  | 0.01  | 0.45 | 9.80E-01 |
| TXLNA   | 3  | 0.22  | 0.34 | 5.11E-01 |
| TXNDC15 | 10 | -0.08 | 0.05 | 1.31E-01 |
| TXNDC5  | 4  | -0.09 | 0.30 | 7.59E-01 |
| TXNRD1  | 4  | -0.08 | 0.38 | 8.33E-01 |
| TYMP    | 2  | -0.19 | 0.23 | 4.04E-01 |
| TYRO3   | 8  | -0.08 | 0.07 | 2.26E-01 |
| UBAC1   | 1  | 0.38  | 0.61 | 5.36E-01 |
| ULBP2   | 6  | -0.53 | 0.21 | 1.01E-02 |
| UMOD    | 15 | -0.13 | 0.06 | 2.19E-02 |
| USO1    | 3  | 0.26  | 0.43 | 5.39E-01 |
| USP8    | 3  | 0.51  | 0.39 | 1.89E-01 |
| UXS1    | 2  | 0.21  | 0.23 | 3.73E-01 |
| VAMP5   | 1  | -1.67 | 0.74 | 2.48E-02 |
| VASH1   | 4  | -0.07 | 0.27 | 7.94E-01 |
| VASN    | 5  | 0.11  | 0.10 | 2.62E-01 |
| VAT1    | 9  | -0.22 | 0.18 | 2.13E-01 |
| VCAM1   | 10 | -0.23 | 0.16 | 1.53E-01 |
| VCAN    | 13 | 0.00  | 0.06 | 9.44E-01 |
| VEGFA   | 13 | -0.03 | 0.06 | 5.86E-01 |
| VEGFC   | 14 | -0.12 | 0.17 | 4.82E-01 |
| VEGFD   | 2  | -0.32 | 0.45 | 4.72E-01 |
| VMO1    | 6  | 0.04  | 0.06 | 4.75E-01 |
| VNN2    | 10 | -0.04 | 0.06 | 5.15E-01 |
| VPS37A  | 2  | -0.76 | 0.59 | 2.03E-01 |
| VPS53   | 2  | 0.83  | 0.57 | 1.43E-01 |
| VSIG4   | 8  | 0.20  | 0.26 | 4.48E-01 |
| VSIR    | 8  | -0.11 | 0.12 | 3.59E-01 |
| VSTM1   | 2  | -0.01 | 0.06 | 8.51E-01 |
| VSTM2L  | 2  | -0.26 | 0.21 | 2.14E-01 |
| VTA1    | 3  | -0.28 | 0.41 | 4.90E-01 |
| VTCN1   | 2  | -1.62 | 0.40 | 4.75E-05 |
| VWA1    | 5  | 0.61  | 0.30 | 4.36E-02 |
| VWC2    | 3  | -0.03 | 0.09 | 7.13E-01 |
| VWF     | 6  | -0.23 | 0.13 | 8.75E-02 |
| WARS    | 3  | -0.61 | 0.18 | 6.85E-04 |
| WASF1   | 3  | 0.05  | 0.15 | 7.48E-01 |
| WASF3   | 1  | 0.05  | 0.33 | 8.86E-01 |
| WFDC12  | 9  | -0.21 | 0.15 | 1.66E-01 |
| WFDC2   | 3  | -0.92 | 0.39 | 1.87E-02 |
| WFIKKN1 | 12 | -0.17 | 0.14 | 2.11E-01 |
| WFIKKN2 | 4  | 0.26  | 0.07 | 1.64E-04 |
| WIF1    | 13 | 0.18  | 0.13 | 1.57E-01 |
| WWP2    | 3  | 0.14  | 0.23 | 5.29E-01 |
| XCL1    | 9  | -0.03 | 0.06 | 6.60E-01 |
| XG      | 1  | -0.87 | 0.83 | 2.97E-01 |
| XPNPEP2 | 12 | -0.09 | 0.16 | 5.89E-01 |
| XRCC4   | 1  | 0.70  | 0.69 | 3.10E-01 |
| YES1    | 2  | 0.04  | 0.47 | 9.38E-01 |
| YTHDF3  | 1  | -0.02 | 0.52 | 9.73E-01 |
| ZBTB16  | 7  | 0.04  | 0.12 | 7.70E-01 |
| ZBTB17  | 1  | 0.82  | 0.62 | 1.87E-01 |

**Supplementary Table 18. Function of proteins affecting healthspan or lifespan in MR analysis.**

| Protein  | Function                                                                                                                                                                                                                                                                                                                                                                                                                                                                                                                                                                                                                      |
|----------|-------------------------------------------------------------------------------------------------------------------------------------------------------------------------------------------------------------------------------------------------------------------------------------------------------------------------------------------------------------------------------------------------------------------------------------------------------------------------------------------------------------------------------------------------------------------------------------------------------------------------------|
| AGRP     | Agouti-related protein; Plays a role in weight homeostasis. Involved in the control of feeding behavior through the central melanocortin system. Acts as alpha melanocyte-stimulating hormone antagonist by inhibiting cAMP production mediated by stimulation of melanocortin receptors within the hypothalamus and adrenal gland. Has very low activity with MC5R (By similarity). Is an inverse agonist for MC3R and MC4R being able to suppress their constitutive activity. It promotes MC3R and MC4R endocytosis in an arrestin-dependent manner; <u>Endogenous ligands</u>                                             |
| CA11     | Carbonic anhydrase-related protein 11; Does not have a catalytic activity; Carbonic anhydrases                                                                                                                                                                                                                                                                                                                                                                                                                                                                                                                                |
| CCN1     | Cyclin-A2; Cyclin which controls both the G1/S and the G2/M transition phases of the cell cycle. Functions through the formation of specific serine/threonine protein kinase holoenzyme complexes with the cyclin-dependent protein kinases CDK1 or CDK2. The cyclin subunit confers the substrate specificity of these complexes and differentially interacts with and activates CDK1 and CDK2 throughout the cell cycle; <u>Cyclins</u>                                                                                                                                                                                     |
| CD27     | Tumor necrosis factor receptor superfamily member 7; CD27 antigen; Receptor for CD70/CD27L. May play a role in survival of activated T-cells. May play a role in apoptosis through association with SIVA1                                                                                                                                                                                                                                                                                                                                                                                                                     |
| CD74     | HLA class II histocompatibility antigen gamma chain; Plays a critical role in MHC class II antigen processing by stabilizing peptide-free class II alpha/beta heterodimers in a complex soon after their synthesis and directing transport of the complex from the endoplasmic reticulum to the endosomal/lysosomal system where the antigen processing and binding of antigenic peptides to MHC class II takes place. Serves as cell surface receptor for the cytokine MIF; <u>CD molecules</u>                                                                                                                              |
| CDH1     | Cadherin-1; Cadherins are calcium-dependent cell adhesion proteins. They preferentially interact with themselves in a homophilic manner in connecting cells; cadherins may thus contribute to the sorting of heterogeneous cell types. CDH1 is involved in mechanisms regulating cell-cell adhesions, mobility and proliferation of epithelial cells. Has a potent invasive suppressor role. It is a ligand for integrin alpha-E/beta-7                                                                                                                                                                                       |
| CDH17    | Cadherin-17; Cadherins are calcium-dependent cell adhesion proteins. They preferentially interact with themselves in a homophilic manner in connecting cells; cadherins may thus contribute to the sorting of heterogeneous cell types. LI-cadherin may have a role in the morphological organization of liver and intestine. <u>Involved in intestinal peptide transport</u>                                                                                                                                                                                                                                                 |
| CDHR2    | Cadherin-related family member 2; Intermicrovillar adhesion molecule that forms, via its extracellular domain, calcium-dependent heterophilic complexes with CDHR5 on adjacent microvilli. Thereby, controls the packing of microvilli at the apical membrane of epithelial cells. Through its cytoplasmic domain, interacts with microvillus cytoplasmic proteins to form the intermicrovillar adhesion complex/IMAC. This complex plays a central role in microvilli and epithelial brush border differentiation. May also play a role in cell-cell adhesion and contact inhibition in epithelial cells; <u>Cadhe [...]</u> |
| CEACAM21 | Carcinoembryonic antigen-related cell adhesion molecule 21; Carcinoembryonic antigen related cell adhesion molecule family; Belongs to the immunoglobulin superfamily. CEA family                                                                                                                                                                                                                                                                                                                                                                                                                                             |
| CPE      | Carboxypeptidase E; Removes residual C-terminal Arg or Lys remaining after initial endoprotease cleavage during prohormone processing. Processes proinsulin; Belongs to the peptidase M14 family                                                                                                                                                                                                                                                                                                                                                                                                                              |
| CXADR    | Coxsackievirus and adenovirus receptor; Component of the epithelial apical junction complex that may function as a homophilic cell adhesion molecule and is essential for tight junction integrity. Also involved in transepithelial migration of leukocytes through adhesive interactions with JAML a transmembrane protein of the plasma membrane of leukocytes. The interaction between both receptors also mediates the activation of gamma-delta T-cells, a subpopulation of T-cells residing in epithelia and involved in tissue homeostasis and repair. <u>Upon epithelial CXADR-binding, JAML induces downs [...]</u> |
| CXCL13   | C-X-C motif chemokine 13; Chemotactic for B-lymphocytes but not for T-lymphocytes, monocytes and neutrophils. Does not induce calcium release in B- lymphocytes. Binds to BLR1/CXCR5; <u>Chemokine ligands</u>                                                                                                                                                                                                                                                                                                                                                                                                                |

|         |                                                                                                                                                                                                                                                                                                                                                                                                                                                                                                                                                                                                                        |
|---------|------------------------------------------------------------------------------------------------------------------------------------------------------------------------------------------------------------------------------------------------------------------------------------------------------------------------------------------------------------------------------------------------------------------------------------------------------------------------------------------------------------------------------------------------------------------------------------------------------------------------|
| CXCL9   | C-X-C motif chemokine 9; Cytokine that affects the growth, movement, or activation state of cells that participate in immune and inflammatory response. Chemotactic for activated T-cells. Binds to CXCR3; Belongs to the intercrine alpha (chemokine CxC) family                                                                                                                                                                                                                                                                                                                                                      |
| F3      | Coagulation factor iii (tissue factor); Tissue factor; Initiates blood coagulation by forming a complex with circulating factor VII or VIIa. The [TF:VIIa] complex activates factors IX or X by specific limited protolysis. TF plays a role in normal hemostasis by initiating the cell-surface assembly and propagation of the coagulation protease cascade                                                                                                                                                                                                                                                          |
| FASLG   | Tumor necrosis factor ligand superfamily member 6; Cytokine that binds to TNFRSF6/FAS, a receptor that transduces the apoptotic signal into cells. Involved in cytotoxic T-cell-mediated apoptosis, natural killer cell-mediated apoptosis and in T-cell development. Initiates fratricidal/suicidal activation-induced cell death (AICD) in antigen-activated T-cells contributing to the termination of immune responses (By similarity). TNFRSF6/FAS-mediated apoptosis has also a role in the induction of peripheral tolerance (By similarity). Binds to TNFRSF6B/DcR3, a decoy receptor that blocks apopto [...] |
| FES     | Tyrosine-protein kinase Fes/Fps; Tyrosine-protein kinase that acts downstream of cell surface receptors and plays a role in the regulation of the actin cytoskeleton, microtubule assembly, cell attachment and cell spreading. Plays a role in FCER1 (high affinity immunoglobulin epsilon receptor)-mediated signaling in mast cells. Acts downstream of the activated FCER1 receptor and the mast/stem cell growth factor receptor KIT. Plays a role in the regulation of mast cell degranulation. Plays a role in the regulation of cell differentiation and promotes neurite outgrowth in response to NGF [...]   |
| FOXO3   | Forkhead box protein O3; Transcriptional activator which triggers apoptosis in the absence of survival factors, including neuronal cell death upon oxidative stress. Recognizes and binds to the DNA sequence 5'-[AG]TAAA[TC]A-3'. Participates in post-transcriptional regulation of MYC: following phosphorylation by MAPKAPK5, promotes induction of miR-34b and miR-34c expression, 2 post-transcriptional regulators of MYC that bind to the 3'UTR of MYC transcript and prevent its translation; Forkhead boxes                                                                                                  |
| FURIN   | Furin, paired basic amino acid cleaving enzyme; Furin; Furin is likely to represent the ubiquitous endoprotease activity within constitutive secretory pathways and capable of cleavage at the RX(K/R)R consensus motif; Proprotein convertase subtilisin/kexin family                                                                                                                                                                                                                                                                                                                                                 |
| GCNT1   | Beta-1,3-galactosyl-O-glycosyl-glycoprotein beta-1,6-N-acetylglucosaminyltransferase; Glycosyltransferase that catalyzes the transfer of an N-acetylglucosamine moiety onto mucin-type core 1 O-glycan to form the branched mucin-type core 2 O-glycan. Mucin-type core 2 O-glycans play an important role in leukocyte extravasation as they serve as scaffolds for the display of the selectin ligand sialyl Lewis X by leukocytes; Glucosaminyl transferases/xylosyltransferases                                                                                                                                    |
| GFAP    | Glial fibrillary acidic protein; GFAP, a class-III intermediate filament, is a cell-specific marker that, during the development of the central nervous system, distinguishes astrocytes from other glial cells                                                                                                                                                                                                                                                                                                                                                                                                        |
| GP1BA   | Platelet glycoprotein Ib alpha chain; GP-Ib, a surface membrane protein of platelets, participates in the formation of platelet plugs by binding to the A1 domain of vWF, which is already bound to the subendothelium; CD molecules                                                                                                                                                                                                                                                                                                                                                                                   |
| GPNMB   | Transmembrane glycoprotein NMB; Could be a melanogenic enzyme; Belongs to the PMEL/NMB family                                                                                                                                                                                                                                                                                                                                                                                                                                                                                                                          |
| GRN     | Granulin precursor; Granulins; Granulins have possible cytokine-like activity. They may play a role in inflammation, wound repair, and tissue remodeling                                                                                                                                                                                                                                                                                                                                                                                                                                                               |
| GZMB    | Granzyme B; This enzyme is necessary for target cell lysis in cell-mediated immune responses. It cleaves after Asp. Seems to be linked to an activation cascade of caspases (aspartate-specific cysteine proteases) responsible for apoptosis execution. Cleaves caspase-3, -7, -9 and 10 to give rise to active enzymes mediating apoptosis; Belongs to the peptidase S1 family. Granzyme subfamily                                                                                                                                                                                                                   |
| HLA-DRA | Major histocompatibility complex, class ii, dr alpha; HLA class II histocompatibility antigen, DR alpha chain; Binds peptides derived from antigens that access the endocytic route of antigen presenting cells (APC) and presents them on the cell surface for recognition by the CD4 T-cells. The peptide binding cleft accommodates peptides of 10-30 residues. The peptides presented by MHC class II molecules are generated mostly by degradation of proteins that access the endocytic route, where they are processed by lysosomal proteases and other hydrolases. Exogenous antigens that have been end [...] |

|         |                                                                                                                                                                                                                                                                                                                                                                                                                                                                                                                                                                                                                              |
|---------|------------------------------------------------------------------------------------------------------------------------------------------------------------------------------------------------------------------------------------------------------------------------------------------------------------------------------------------------------------------------------------------------------------------------------------------------------------------------------------------------------------------------------------------------------------------------------------------------------------------------------|
| IGFBP1  | Insulin-like growth factor-binding protein 1; IGF-binding proteins prolong the half-life of the IGFs and have been shown to either inhibit or stimulate the growth promoting effects of the IGFs on cell culture. They alter the interaction of IGFs with their cell surface receptors.<br>Promotes cell migration                                                                                                                                                                                                                                                                                                           |
| IL19    | Interleukin-19; May play some important roles in inflammatory responses. Up-regulates IL-6 and TNF-alpha and induces apoptosis (By similarity); Interleukins                                                                                                                                                                                                                                                                                                                                                                                                                                                                 |
| ITGB6   | Integrin subunit beta 6; Integrin beta-6; Integrin alpha-V/beta-6 is a receptor for fibronectin and cytostatin. It recognizes the sequence R-G-D in its ligands. Internalisation of integrin alpha-V/beta-6 via clathrin-mediated endocytosis promotes carcinoma cell invasion.<br>ITGAV:ITGB6 acts as a receptor for fibrillin-1 (FBN1) and mediates R-G-D-dependent cell adhesion to FBN1                                                                                                                                                                                                                                  |
| KIR2DL3 | Killer cell immunoglobulin-like receptor 2DL3; Receptor on natural killer (NK) cells for HLA-C alleles (HLA-Cw1, HLA-Cw3 and HLA-Cw7). Inhibits the activity of NK cells thus preventing cell lysis; CD molecules                                                                                                                                                                                                                                                                                                                                                                                                            |
| LAIR1   | Leukocyte-associated immunoglobulin-like receptor 1; Functions as an inhibitory receptor that plays a constitutive negative regulatory role on cytolytic function of natural killer (NK) cells, B-cells and T-cells. Activation by Tyr phosphorylation results in recruitment and activation of the phosphatases PTPN6 and PTPN11. It also reduces the increase of intracellular calcium evoked by B-cell receptor ligation. May also play its inhibitory role independently of SH2-containing phosphatases. Modulates cytokine production in CD4+ T-cells, down-regulating IL2 and IFNG production while induc [...]        |
| LDLR    | Low-density lipoprotein receptor; Binds LDL, the major cholesterol-carrying lipoprotein of plasma, and transports it into cells by endocytosis. In order to be internalized, the receptor-ligand complexes must first cluster into clathrin-coated pits; Belongs to the LDLR family                                                                                                                                                                                                                                                                                                                                          |
| LEFTY2  | Left-right determination factor 2; Required for left-right (L-R) asymmetry determination of organ systems in mammals. May play a role in endometrial bleeding                                                                                                                                                                                                                                                                                                                                                                                                                                                                |
| LGALS9  | Galectin-9; Binds galactosides. Has high affinity for the Forssman pentasaccharide. Ligand for HAVCR2/TIM3. Binding to HAVCR2 induces T-helper type 1 lymphocyte (Th1) death. Also stimulates bactericidal activity in infected macrophages by causing macrophage activation and IL1B secretion which restricts intracellular bacterial growth (By similarity). Ligand for P4HB; the interaction retains P4HB at the cell surface of Th2 T-helper cells, increasing disulfide reductase activity at the plasma membrane, altering the plasma membrane redox state and enhancing cell migration. Ligand for CD44; [...]       |
| LILRB4  | Leukocyte immunoglobulin-like receptor subfamily B member 4; Receptor for class I MHC antigens. Recognizes a broad spectrum of HLA-A, HLA-B, HLA-C and HLA-G alleles. Involved in the down-regulation of the immune response and the development of tolerance, e.g. towards transplants. Interferes with TNFRSF5- signaling and NF-kappa-B up-regulation. Inhibits receptor-mediated phosphorylation of cellular proteins and mobilization of intracellular calcium ions; CD molecules                                                                                                                                       |
| PAG1    | Phosphoprotein associated with glycosphingolipid-enriched microdomains 1; Negatively regulates TCR (T-cell antigen receptor)- mediated signaling in T-cells and FCER1 (high affinity immunoglobulin epsilon receptor)-mediated signaling in mast cells. Promotes CSK activation and recruitment to lipid rafts, which results in LCK inhibition. Inhibits immunological synapse formation by preventing dynamic arrangement of lipid raft proteins. May be involved in cell adhesion signaling                                                                                                                               |
| PCSK9   | Proprotein convertase subtilisin/kexin type 9; Crucial player in the regulation of plasma cholesterol homeostasis. Binds to low-density lipoprotein receptor family members: low density lipoprotein receptor (LDLR), very low density lipoprotein receptor (VLDLR), apolipoprotein E receptor (LRP1/APOER) and apolipoprotein receptor 2 (LRP8/APOER2), and promotes their degradation in intracellular acidic compartments. Acts via a non-proteolytic mechanism to enhance the degradation of the hepatic LDLR through a clathrin LDLRAP1/ARH-mediated pathway. May prevent the recycling of LDLR from endosomes to [...] |
| PLA2G7  | Platelet-activating factor acetylhydrolase; Modulates the action of platelet-activating factor (PAF) by hydrolyzing the sn-2 ester bond to yield the biologically inactive lyso-PAF. Has a specificity for substrates with a short residue at the sn-2 position. It is inactive against long-chain phospholipids; Phospholipases                                                                                                                                                                                                                                                                                             |

|         |                                                                                                                                                                                                                                                                                                                                                                                                                                                                                                                                                                                                                        |
|---------|------------------------------------------------------------------------------------------------------------------------------------------------------------------------------------------------------------------------------------------------------------------------------------------------------------------------------------------------------------------------------------------------------------------------------------------------------------------------------------------------------------------------------------------------------------------------------------------------------------------------|
| POLR2F  | DNA-directed RNA polymerases I, II, and III subunit RPABC2; DNA-dependent RNA polymerases catalyze the transcription of DNA into RNA using the four ribonucleoside triphosphates as substrates. Common component of RNA polymerases I, II, and III which synthesize ribosomal RNA precursors, mRNA precursors and many functional non-coding RNAs, and small RNAs, such as 5S rRNA and tRNAs, respectively. Pol II is the central component of the basal RNA polymerase II transcription machinery. Pols are composed of mobile elements that move relative to each other. In Pol II, POLR2F/RPB6 is part of the [...] |
| RP2     | Protein XRP2; Acts as a GTPase-activating protein (GAP) involved in trafficking between the Golgi and the ciliary membrane. Involved in localization of proteins, such as NPHP3, to the cilium membrane by inducing hydrolysis of GTP ARL3, leading to the release of UNC119 (or UNC119B). Acts as a GTPase-activating protein (GAP) for tubulin in concert with tubulin-specific chaperone C, but does not enhance tubulin heterodimerization. Acts as guanine nucleotide dissociation inhibitor towards ADP-ribosylation factor-like proteins; Belongs to the TBCC family                                            |
| SIT1    | Signaling threshold-regulating transmembrane adapter 1; Negatively regulates TCR (T-cell antigen receptor)- mediated signaling in T-cells. Involved in positive selection of T-cells                                                                                                                                                                                                                                                                                                                                                                                                                                   |
| STC2    | Stanniocalcin-2; Has an anti-hypocalcemic action on calcium and phosphate homeostasis; Belongs to the stanniocalcin family                                                                                                                                                                                                                                                                                                                                                                                                                                                                                             |
| TNFRSF8 | Tumor necrosis factor receptor superfamily member 8; Receptor for TNFSF8/CD30L. May play a role in the regulation of cellular growth and transformation of activated lymphoblasts. Regulates gene expression through activation of NF- kappa-B                                                                                                                                                                                                                                                                                                                                                                         |
| VCAM1   | Vascular cell adhesion protein 1; Important in cell-cell recognition. Appears to function in leukocyte-endothelial cell adhesion. Interacts with integrin alpha-4/beta-1 (ITGA4/ITGB1) on leukocytes, and mediates both adhesion and signal transduction. The VCAM1/ITGA4/ITGB1 interaction may play a pathophysiologic role both in immune responses and in leukocyte emigration to sites of inflammation; C2-set domain containing                                                                                                                                                                                   |
| VSTM2L  | V-set and transmembrane domain-containing protein 2-like protein; V-set and transmembrane domain containing 2 like                                                                                                                                                                                                                                                                                                                                                                                                                                                                                                     |
