# Supplementary material for: Using genetics and proteomics data to identify proteins causally related to COVID-19, healthspan and lifespan: a Mendelian randomization study
Source: publisher site journal article supplement (doi:10.18632/aging.205711), 2024-04-03
Supplement: Supplementary file [file aging-v16i7-205711-supplementary-material-SD3.pdf]

## SUPPLEMENTARY TABLES

**Supplementary Table 6. Sensitivity analysis of genetically predicted proteins with severe COVID-19 using the weighted mode and weighted median methods.**

| Protein       | No. of SNPs | BETA (Weighted Mode) | SE (Weighted Mode) | P-val (Weighted Mode) | BETA (Weighted Median) | SE (Weighted Median) | P-val (Weighted Median) |
|---------------|-------------|----------------------|--------------------|-----------------------|------------------------|----------------------|-------------------------|
| ADGRG2        | 6           | 0.15                 | 0.15               | 3.36E-01              | 0.18                   | 0.16                 | 2.60E-01                |
| AMY2B         | 9           | -0.08                | 0.04               | 3.09E-02              | -0.09                  | 0.04                 | 2.36E-02                |
| CCL15         | 4           | 0.47                 | 0.08               | 1.23E-09              | 0.39                   | 0.08                 | 1.85E-07                |
| CD109         | 6           | -0.49                | 0.08               | 5.78E-10              | -0.48                  | 0.08                 | 1.31E-10                |
| CD209         | 8           | 0.11                 | 0.02               | 3.56E-11              | 0.11                   | 0.02                 | 1.28E-11                |
| CD34          | 3           | -0.24                | 0.04               | 5.26E-10              | -0.23                  | 0.04                 | 2.46E-09                |
| CDH15         | 4           | 0.31                 | 0.05               | 6.57E-11              | 0.30                   | 0.05                 | 1.62E-10                |
| CKMT1A_CKMT1B | 6           | 0.10                 | 0.20               | 6.16E-01              | 0.25                   | 0.14                 | 8.03E-02                |
| CX3CL1        | 7           | 0.02                 | 0.49               | 9.61E-01              | -0.55                  | 0.17                 | 1.45E-03                |
| ERBB4         | 16          | -0.14                | 0.08               | 7.33E-02              | -0.15                  | 0.07                 | 3.54E-02                |
| FGF19         | 5           | 0.37                 | 0.06               | 5.58E-09              | 0.31                   | 0.06                 | 8.35E-07                |
| GOLM2         | 9           | 0.29                 | 0.07               | 1.88E-05              | 0.17                   | 0.08                 | 3.01E-02                |
| ICAM5         | 6           | -0.09                | 0.02               | 3.58E-05              | -0.09                  | 0.02                 | 7.01E-05                |
| ISLR2         | 8           | -0.16                | 0.03               | 4.74E-10              | -0.17                  | 0.03                 | 9.15E-11                |
| KEL           | 16          | -0.13                | 0.04               | 4.93E-04              | -0.08                  | 0.05                 | 9.28E-02                |
| KLK1          | 13          | -0.10                | 0.02               | 2.16E-09              | -0.10                  | 0.02                 | 4.65E-10                |
| LAMP3         | 10          | -0.09                | 0.09               | 2.94E-01              | -0.19                  | 0.10                 | 5.00E-02                |
| LEFTY2        | 4           | 0.04                 | 0.35               | 9.07E-01              | -0.57                  | 0.31                 | 6.21E-02                |
| LGALS4        | 3           | -0.19                | 0.03               | 3.31E-11              | -0.19                  | 0.03                 | 2.59E-11                |
| LGALS8        | 6           | -0.22                | 0.04               | 3.48E-07              | -0.20                  | 0.04                 | 3.83E-06                |
| MNDA          | 1           | NA                   | NA                 | NA                    | NA                     | NA                   | NA                      |
| MUC13         | 4           | -0.03                | 0.10               | 7.50E-01              | -0.18                  | 0.09                 | 3.98E-02                |
| NRCAM         | 6           | -0.11                | 0.17               | 5.02E-01              | -0.25                  | 0.15                 | 8.32E-02                |
| PECAM1        | 8           | -0.19                | 0.03               | 6.47E-10              | -0.19                  | 0.03                 | 5.32E-10                |
| PODXL         | 6           | -0.20                | 0.03               | 1.59E-09              | -0.19                  | 0.03                 | 1.68E-08                |
| PTPRM         | 8           | -0.16                | 0.03               | 1.18E-09              | -0.16                  | 0.03                 | 8.58E-10                |
| REG1A         | 5           | 0.13                 | 0.06               | 1.95E-02              | 0.17                   | 0.06                 | 5.56E-03                |
| REG1B         | 7           | 0.09                 | 0.05               | 7.77E-02              | 0.15                   | 0.06                 | 1.69E-02                |
| SCG2          | 4           | -0.16                | 0.25               | 5.22E-01              | -0.85                  | 0.19                 | 1.17E-05                |
| SCGN          | 5           | 0.66                 | 0.27               | 1.55E-02              | 0.23                   | 0.13                 | 7.21E-02                |
| SEMA4C        | 4           | -0.43                | 0.07               | 6.90E-10              | -0.43                  | 0.07                 | 1.95E-10                |
| SFTPD         | 11          | -0.08                | 0.02               | 1.04E-05              | -0.09                  | 0.02                 | 7.16E-07                |
| TDGF1         | 1           | NA                   | NA                 | NA                    | NA                     | NA                   | NA                      |
| VAMP5         | 2           | NA                   | NA                 | NA                    | NA                     | NA                   | NA                      |
| VTCN1         | 2           | NA                   | NA                 | NA                    | NA                     | NA                   | NA                      |

The results for proteins with number of SNPs less than 3 are filled with NA values.

**Supplementary Table 7. Sensitivity analysis of genetically predicted proteins with COVID-19 hospitalization using the weighted mode and weighted median methods.**

| <b>Protein</b> | <b>No. of SNPs</b> | <b>BETA (Weighted Mode)</b> | <b>SE (Weighted Mode)</b> | <b>P-val (Weighted Mode)</b> | <b>BETA (Weighted Median)</b> | <b>SE (Weighted Median)</b> | <b>P-val (Weighted Median)</b> |
|----------------|--------------------|-----------------------------|---------------------------|------------------------------|-------------------------------|-----------------------------|--------------------------------|
| ADGRG1         | 9                  | -0.04                       | 0.08                      | 6.66E-01                     | -0.13                         | 0.07                        | 7.43E-02                       |
| ADGRG2         | 6                  | 0.11                        | 0.09                      | 2.52E-01                     | 0.17                          | 0.13                        | 1.80E-01                       |
| AMY2A          | 8                  | -0.04                       | 0.03                      | 2.65E-01                     | -0.05                         | 0.04                        | 2.11E-01                       |
| AMY2B          | 9                  | -0.04                       | 0.02                      | 1.31E-01                     | -0.05                         | 0.03                        | 8.59E-02                       |
| CA4            | 9                  | 0.04                        | 0.03                      | 1.67E-01                     | 0.05                          | 0.03                        | 1.16E-01                       |
| CCL15          | 4                  | 0.28                        | 0.05                      | 9.09E-08                     | 0.26                          | 0.05                        | 2.61E-07                       |
| CD109          | 6                  | -0.42                       | 0.05                      | 1.28E-14                     | -0.40                         | 0.06                        | 2.91E-12                       |
| CD209          | 8                  | 0.11                        | 0.01                      | 4.03E-21                     | 0.11                          | 0.01                        | 5.57E-20                       |
| CD34           | 3                  | -0.22                       | 0.03                      | 4.84E-16                     | -0.19                         | 0.03                        | 1.23E-13                       |
| CDH15          | 4                  | 0.17                        | 0.03                      | 1.06E-07                     | 0.17                          | 0.03                        | 8.76E-08                       |
| CLEC14A        | 8                  | -0.27                       | 0.04                      | 4.35E-14                     | -0.22                         | 0.04                        | 2.22E-07                       |
| CTSS           | 7                  | -0.06                       | 0.08                      | 4.95E-01                     | -0.09                         | 0.08                        | 2.66E-01                       |
| CX3CL1         | 7                  | -0.02                       | 0.22                      | 9.46E-01                     | -0.26                         | 0.12                        | 3.27E-02                       |
| EFNA1          | 4                  | 0.13                        | 0.03                      | 1.84E-05                     | 0.13                          | 0.03                        | 1.37E-05                       |
| ERBB4          | 16                 | -0.03                       | 0.05                      | 5.63E-01                     | -0.06                         | 0.05                        | 2.04E-01                       |
| FGF19          | 5                  | 0.24                        | 0.04                      | 3.28E-08                     | 0.23                          | 0.04                        | 2.98E-08                       |
| GOLM2          | 9                  | 0.11                        | 0.08                      | 2.12E-01                     | 0.12                          | 0.05                        | 1.54E-02                       |
| GP2            | 8                  | 0.16                        | 0.02                      | 2.67E-15                     | 0.15                          | 0.02                        | 6.80E-10                       |
| ICAM2          | 10                 | -0.05                       | 0.01                      | 1.51E-06                     | -0.02                         | 0.03                        | 4.19E-01                       |
| ICAM5          | 7                  | -0.04                       | 0.02                      | 1.12E-02                     | -0.07                         | 0.02                        | 5.37E-05                       |
| ISLR2          | 8                  | -0.14                       | 0.02                      | 1.38E-15                     | -0.13                         | 0.02                        | 3.87E-13                       |
| KLK1           | 13                 | -0.06                       | 0.01                      | 8.04E-08                     | -0.06                         | 0.01                        | 5.47E-08                       |
| LEFTY2         | 4                  | -0.10                       | 0.15                      | 4.79E-01                     | -0.33                         | 0.19                        | 8.40E-02                       |
| LGALS4         | 3                  | -0.19                       | 0.02                      | 3.97E-22                     | -0.18                         | 0.02                        | 8.61E-22                       |
| MET            | 20                 | -0.26                       | 0.04                      | 8.78E-10                     | -0.21                         | 0.05                        | 1.49E-05                       |
| NELL2          | 14                 | -0.44                       | 0.07                      | 2.36E-09                     | -0.28                         | 0.08                        | 7.18E-04                       |
| NRCAM          | 7                  | 0.00                        | 0.08                      | 9.67E-01                     | -0.04                         | 0.09                        | 6.38E-01                       |
| PECAM1         | 8                  | -0.16                       | 0.02                      | 1.35E-15                     | -0.15                         | 0.02                        | 1.37E-13                       |
| PODXL          | 6                  | -0.17                       | 0.02                      | 3.06E-14                     | -0.14                         | 0.02                        | 1.63E-09                       |
| PRSS27         | 18                 | -0.08                       | 0.02                      | 2.14E-07                     | -0.07                         | 0.02                        | 1.08E-05                       |
| PTPRM          | 8                  | -0.14                       | 0.02                      | 5.37E-16                     | -0.14                         | 0.02                        | 3.28E-16                       |
| REG1A          | 5                  | 0.12                        | 0.04                      | 7.72E-04                     | 0.17                          | 0.04                        | 2.68E-05                       |
| REG1B          | 7                  | 0.09                        | 0.03                      | 1.15E-02                     | 0.08                          | 0.04                        | 3.96E-02                       |
| SCG2           | 4                  | 0.01                        | 0.15                      | 9.33E-01                     | -0.48                         | 0.12                        | 1.20E-04                       |
| SCGN           | 5                  | 0.09                        | 0.16                      | 5.68E-01                     | 0.13                          | 0.07                        | 7.15E-02                       |
| SELE           | 9                  | -0.10                       | 0.01                      | 3.55E-16                     | -0.10                         | 0.01                        | 5.32E-15                       |
| SEMA3F         | 5                  | -0.12                       | 0.10                      | 2.31E-01                     | -0.15                         | 0.10                        | 1.36E-01                       |
| SEMA4C         | 5                  | -0.36                       | 0.05                      | 1.03E-14                     | -0.34                         | 0.05                        | 1.18E-13                       |
| SFTPA2         | 6                  | 0.07                        | 0.02                      | 1.61E-05                     | 0.07                          | 0.02                        | 1.75E-05                       |
| SFTPD          | 11                 | -0.07                       | 0.01                      | 6.42E-09                     | -0.07                         | 0.01                        | 1.70E-08                       |
| TDGF1          | 1                  | NA                          | NA                        | NA                           | NA                            | NA                          | NA                             |
| TGFBR2         | 8                  | -0.57                       | 0.08                      | 8.99E-12                     | -0.30                         | 0.11                        | 5.09E-03                       |
| VAMP5          | 2                  | NA                          | NA                        | NA                           | NA                            | NA                          | NA                             |

The results for proteins with number of SNPs less than 3 are filled with NA values.

**Supplementary Table 8. Sensitivity analysis of genetically predicted proteins with COVID-19 infection using the weighted mode and weighted median methods.**

| <b>Protein</b> | <b>No. of SNPs</b> | <b>BETA (Weighted Mode)</b> | <b>SE (Weighted Mode)</b> | <b>P-val (Weighted Mode)</b> | <b>BETA (Weighted Median)</b> | <b>SE (Weighted Median)</b> | <b>P-val (Weighted Median)</b> |
|----------------|--------------------|-----------------------------|---------------------------|------------------------------|-------------------------------|-----------------------------|--------------------------------|
| ADAM15         | 8                  | 0.04                        | 0.01                      | 1.50E-09                     | 0.04                          | 0.01                        | 1.58E-09                       |
| ADGRG1         | 10                 | 0.02                        | 0.03                      | 5.94E-01                     | -0.01                         | 0.03                        | 7.22E-01                       |
| ADGRG2         | 6                  | 0.04                        | 0.04                      | 3.23E-01                     | 0.07                          | 0.05                        | 1.30E-01                       |
| AMY2A          | 8                  | 0.00                        | 0.01                      | 8.32E-01                     | -0.02                         | 0.02                        | 3.48E-01                       |
| AMY2B          | 9                  | -0.01                       | 0.01                      | 3.75E-01                     | -0.03                         | 0.01                        | 4.90E-02                       |
| BST2           | 11                 | -0.01                       | 0.03                      | 8.44E-01                     | 0.00                          | 0.03                        | 9.41E-01                       |
| CA4            | 11                 | 0.00                        | 0.01                      | 8.09E-01                     | 0.00                          | 0.01                        | 7.70E-01                       |
| CCL15          | 4                  | 0.19                        | 0.03                      | 1.32E-12                     | 0.16                          | 0.03                        | 6.19E-09                       |
| CCL28          | 18                 | 0.00                        | 0.02                      | 9.62E-01                     | -0.01                         | 0.02                        | 5.38E-01                       |
| CD109          | 6                  | -0.36                       | 0.03                      | 1.20E-37                     | -0.29                         | 0.04                        | 1.84E-12                       |
| CD209          | 8                  | 0.10                        | 0.01                      | 5.45E-54                     | 0.10                          | 0.01                        | 1.10E-48                       |
| CD34           | 3                  | -0.18                       | 0.01                      | 3.99E-42                     | -0.16                         | 0.01                        | 2.50E-38                       |
| CD58           | 12                 | -0.19                       | 0.01                      | 1.21E-40                     | -0.13                         | 0.03                        | 5.94E-06                       |
| CDH17          | 12                 | 0.09                        | 0.01                      | 1.19E-14                     | 0.02                          | 0.03                        | 5.69E-01                       |
| CKMT1A_CKMT1B  | 8                  | 0.01                        | 0.03                      | 7.50E-01                     | 0.02                          | 0.03                        | 5.08E-01                       |
| CLEC14A        | 9                  | -0.24                       | 0.02                      | 1.05E-37                     | -0.21                         | 0.02                        | 2.65E-18                       |
| CTSS           | 7                  | -0.06                       | 0.04                      | 8.33E-02                     | -0.07                         | 0.04                        | 7.34E-02                       |
| CX3CL1         | 8                  | -0.05                       | 0.06                      | 3.36E-01                     | -0.16                         | 0.07                        | 3.30E-02                       |
| DPP10          | 5                  | -0.01                       | 0.02                      | 4.96E-01                     | -0.02                         | 0.02                        | 2.59E-01                       |
| DRAXIN         | 17                 | -0.05                       | 0.02                      | 6.29E-03                     | -0.05                         | 0.02                        | 5.51E-03                       |
| EFNA1          | 4                  | 0.10                        | 0.01                      | 8.92E-12                     | 0.10                          | 0.01                        | 1.81E-11                       |
| F2R            | 8                  | -0.03                       | 0.03                      | 3.60E-01                     | -0.03                         | 0.03                        | 1.87E-01                       |
| FCGR2B         | 4                  | -0.01                       | 0.01                      | 4.36E-01                     | -0.01                         | 0.02                        | 5.55E-01                       |
| FGF19          | 5                  | 0.16                        | 0.02                      | 4.81E-14                     | 0.15                          | 0.02                        | 6.08E-15                       |
| FGFR2          | 8                  | 0.00                        | 0.04                      | 9.14E-01                     | 0.01                          | 0.03                        | 7.81E-01                       |
| FLT4           | 12                 | 0.00                        | 0.01                      | 7.98E-01                     | 0.00                          | 0.01                        | 5.96E-01                       |
| FOLR1          | 8                  | -0.06                       | 0.05                      | 2.88E-01                     | -0.13                         | 0.05                        | 5.44E-03                       |
| GKN1           | 4                  | 0.10                        | 0.11                      | 3.50E-01                     | 0.27                          | 0.07                        | 5.46E-05                       |
| GOLM2          | 8                  | 0.03                        | 0.02                      | 1.24E-01                     | 0.06                          | 0.02                        | 1.71E-02                       |
| ICAM2          | 10                 | -0.01                       | 0.01                      | 3.96E-01                     | 0.00                          | 0.02                        | 9.41E-01                       |
| ICAM5          | 7                  | -0.01                       | 0.01                      | 1.37E-01                     | -0.01                         | 0.01                        | 1.77E-01                       |
| IDS            | 3                  | -0.01                       | 0.02                      | 7.23E-01                     | -0.02                         | 0.02                        | 3.63E-01                       |
| ISLR2          | 8                  | -0.13                       | 0.01                      | 6.41E-39                     | -0.11                         | 0.01                        | 2.62E-26                       |
| ITGA6          | 7                  | -0.03                       | 0.02                      | 1.43E-01                     | -0.03                         | 0.02                        | 8.71E-02                       |
| ITGB1          | 7                  | 0.01                        | 0.03                      | 7.85E-01                     | 0.00                          | 0.03                        | 9.52E-01                       |
| KEL            | 17                 | -0.01                       | 0.01                      | 6.63E-01                     | -0.01                         | 0.01                        | 4.39E-01                       |
| KLK1           | 13                 | -0.04                       | 0.01                      | 1.32E-14                     | -0.04                         | 0.01                        | 8.85E-14                       |
| LEFTY2         | 3                  | -0.02                       | 0.06                      | 7.72E-01                     | -0.24                         | 0.09                        | 5.42E-03                       |
| MNDA           | 1                  | NA                          | NA                        | NA                           | NA                            | NA                          | NA                             |
| MUC13          | 4                  | -0.03                       | 0.02                      | 2.23E-01                     | -0.15                         | 0.05                        | 1.88E-03                       |
| NELL2          | 15                 | 0.04                        | 0.06                      | 4.54E-01                     | -0.20                         | 0.05                        | 3.72E-05                       |
| NME3           | 14                 | -0.02                       | 0.02                      | 2.30E-01                     | -0.02                         | 0.02                        | 1.39E-01                       |
| NRCAM          | 7                  | 0.00                        | 0.03                      | 9.40E-01                     | -0.04                         | 0.04                        | 4.03E-01                       |
| PECAM1         | 8                  | -0.14                       | 0.01                      | 1.53E-43                     | -0.14                         | 0.01                        | 9.26E-37                       |
| PLAT           | 4                  | -0.05                       | 0.05                      | 3.13E-01                     | -0.11                         | 0.05                        | 4.46E-02                       |
| PODXL          | 6                  | -0.15                       | 0.01                      | 5.01E-29                     | -0.11                         | 0.01                        | 1.81E-16                       |

|         |    |       |      |          |       |      |          |
|---------|----|-------|------|----------|-------|------|----------|
| PTPRM   | 8  | -0.12 | 0.01 | 1.26E-44 | -0.12 | 0.01 | 7.06E-46 |
| REG1A   | 6  | 0.02  | 0.02 | 1.76E-01 | 0.04  | 0.02 | 1.13E-01 |
| REG1B   | 7  | 0.03  | 0.02 | 3.16E-02 | 0.02  | 0.02 | 4.75E-01 |
| S100A16 | 3  | 0.02  | 0.04 | 6.24E-01 | 0.03  | 0.05 | 5.49E-01 |
| SCARF2  | 8  | -0.03 | 0.02 | 6.28E-02 | -0.03 | 0.02 | 3.68E-02 |
| SCG2    | 4  | -0.13 | 0.06 | 2.44E-02 | -0.33 | 0.06 | 1.93E-08 |
| SEMA3F  | 6  | -0.01 | 0.06 | 8.04E-01 | -0.03 | 0.05 | 5.54E-01 |
| SEMA4C  | 6  | -0.32 | 0.02 | 3.69E-38 | -0.26 | 0.03 | 1.49E-21 |
| SFTPD   | 12 | -0.03 | 0.01 | 1.27E-06 | -0.03 | 0.01 | 1.88E-05 |
| SLITRK2 | 11 | 0.18  | 0.04 | 3.55E-06 | 0.09  | 0.03 | 4.29E-03 |
| SPINK5  | 7  | -0.02 | 0.01 | 2.06E-01 | -0.02 | 0.02 | 2.14E-01 |
| STC1    | 6  | 0.04  | 0.03 | 2.45E-01 | 0.01  | 0.04 | 6.90E-01 |
| TDGF1   | 2  | NA    | NA   | NA       | NA    | NA   | NA       |
| TGFBR2  | 8  | -0.04 | 0.07 | 5.73E-01 | -0.19 | 0.07 | 8.11E-03 |
| ULBP2   | 8  | 0.01  | 0.01 | 5.83E-01 | 0.01  | 0.01 | 5.51E-01 |
| VAMP5   | 2  | NA    | NA   | NA       | NA    | NA   | NA       |
| VTCN1   | 2  | NA    | NA   | NA       | NA    | NA   | NA       |

The results for proteins with number of SNPs less than 3 are filled with NA values.

**Supplementary Table 9. Sensitivity analysis of genetically predicted proteins with severe COVID-19 using MR-SPI.**

| Protein       | No. of SNPs | No. of valid SNPs | BETA (MR-SPI) | SE (MR-SPI) | P-val (MR-SPI) |
|---------------|-------------|-------------------|---------------|-------------|----------------|
| ADGRG2        | 6           | 5                 | 0.25          | 0.13        | 5.34E-02       |
| AMY2B         | 9           | 7                 | -0.06         | 0.04        | 7.58E-02       |
| CCL15         | 4           | 4                 | 0.34          | 0.07        | 1.74E-06       |
| CD109         | 6           | 6                 | -0.35         | 0.08        | 4.11E-06       |
| CD209         | 8           | 8                 | 0.11          | 0.02        | 1.47E-10       |
| CD34          | 3           | 3                 | -0.21         | 0.04        | 3.12E-07       |
| CDH15         | 4           | 4                 | 0.28          | 0.05        | 2.19E-09       |
| CKMT1A_CKMT1B | 6           | 5                 | 0.10          | 0.11        | 3.74E-01       |
| CX3CL1        | 7           | 6                 | -0.46         | 0.11        | 3.84E-05       |
| ERBB4         | 16          | 15                | -0.21         | 0.06        | 3.10E-04       |
| FGF19         | 5           | 5                 | 0.30          | 0.05        | 2.53E-08       |
| GOLM2         | 9           | 8                 | 0.22          | 0.05        | 4.70E-06       |
| ICAM5         | 6           | 6                 | -0.09         | 0.02        | 1.31E-05       |
| ISLR2         | 8           | 8                 | -0.13         | 0.03        | 5.72E-07       |
| KEL           | 16          | 15                | -0.10         | 0.03        | 3.83E-04       |
| KLK1          | 13          | 11                | -0.10         | 0.02        | 2.04E-10       |
| LAMP3         | 10          | 6                 | -0.11         | 0.08        | 1.64E-01       |
| LEFTY2        | 4           | 4                 | -0.16         | 0.21        | 4.40E-01       |
| LGALS4        | 3           | 3                 | -0.19         | 0.03        | 5.43E-11       |
| LGALS8        | 6           | 6                 | -0.22         | 0.03        | 5.08E-10       |
| MUC13         | 4           | 4                 | -0.35         | 0.07        | 1.25E-07       |
| NRCAM         | 6           | 5                 | -0.12         | 0.12        | 2.99E-01       |
| PECAM1        | 8           | 8                 | -0.16         | 0.03        | 5.00E-08       |
| PODXL         | 6           | 6                 | -0.13         | 0.03        | 2.34E-06       |
| PTPRM         | 8           | 7                 | -0.15         | 0.03        | 5.94E-09       |
| REG1A         | 5           | 5                 | 0.53          | 0.06        | 2.30E-17       |
| REG1B         | 7           | 7                 | 0.09          | 0.04        | 2.55E-02       |
| SCG2          | 4           | 4                 | -0.06         | 0.18        | 7.59E-01       |

|        |    |   |       |      |          |
|--------|----|---|-------|------|----------|
| SCGN   | 5  | 5 | 0.11  | 0.10 | 2.42E-01 |
| SEMA4C | 4  | 4 | -0.37 | 0.07 | 7.94E-08 |
| SFTPD  | 11 | 8 | -0.09 | 0.02 | 5.49E-07 |

The results for proteins with number of SNPs less than 3 are omitted.

**Supplementary Table 10. Sensitivity analysis of genetically predicted proteins with COVID-19 hospitalization using MR-SPI.**

| Protein | No. of SNPs | No. of valid SNPs | BETA (MR-SPI) | SE (MR-SPI) | P-val (MR-SPI) |
|---------|-------------|-------------------|---------------|-------------|----------------|
| ADGRG1  | 9           | 8                 | -0.04         | 0.05        | 4.80E-01       |
| ADGRG2  | 6           | 4                 | 0.16          | 0.08        | 5.14E-02       |
| AMY2A   | 8           | 6                 | -0.03         | 0.03        | 2.51E-01       |
| AMY2B   | 9           | 7                 | -0.03         | 0.02        | 1.45E-01       |
| CA4     | 9           | 8                 | 0.03          | 0.03        | 3.23E-01       |
| CCL15   | 4           | 4                 | 0.24          | 0.05        | 6.20E-07       |
| CD109   | 6           | 6                 | -0.32         | 0.05        | 5.44E-11       |
| CD209   | 8           | 8                 | 0.10          | 0.01        | 6.80E-19       |
| CD34    | 3           | 3                 | -0.17         | 0.03        | 3.61E-11       |
| CDH15   | 4           | 4                 | 0.16          | 0.03        | 1.98E-07       |
| CLEC14A | 8           | 8                 | 0.09          | 0.06        | 1.83E-01       |
| CTSS    | 7           | 6                 | -0.07         | 0.06        | 2.56E-01       |
| CX3CL1  | 7           | 5                 | 0.00          | 0.09        | 9.63E-01       |
| EFNA1   | 4           | 4                 | 0.13          | 0.03        | 4.10E-06       |
| ERBB4   | 16          | 14                | -0.04         | 0.03        | 2.56E-01       |
| FGF19   | 5           | 5                 | 0.18          | 0.04        | 2.13E-07       |
| GOLM2   | 9           | 7                 | 0.06          | 0.04        | 9.16E-02       |
| GP2     | 8           | 7                 | 0.17          | 0.02        | 1.91E-21       |
| ICAM2   | 10          | 9                 | -0.10         | 0.01        | 1.85E-12       |
| ICAM5   | 7           | 7                 | -0.20         | 0.03        | 3.39E-13       |
| ISLR2   | 8           | 7                 | 0.02          | 0.04        | 6.94E-01       |
| KLK1    | 13          | 13                | -0.05         | 0.01        | 1.20E-06       |
| LEFTY2  | 4           | 4                 | -0.15         | 0.12        | 2.11E-01       |
| LGALS4  | 3           | 3                 | -0.18         | 0.02        | 6.56E-21       |
| MET     | 20          | 18                | 0.01          | 0.03        | 6.78E-01       |
| NELL2   | 14          | 11                | -0.03         | 0.06        | 6.35E-01       |
| NRCAM   | 7           | 6                 | -0.03         | 0.07        | 6.39E-01       |
| PECAM1  | 8           | 8                 | -0.14         | 0.02        | 1.26E-12       |
| PODXL   | 6           | 6                 | -0.12         | 0.02        | 9.56E-11       |
| PRSS27  | 18          | 17                | -0.08         | 0.02        | 9.75E-08       |
| PTPRM   | 8           | 7                 | -0.13         | 0.02        | 9.40E-15       |
| REG1A   | 5           | 4                 | 0.14          | 0.03        | 3.03E-07       |
| REG1B   | 7           | 5                 | 0.06          | 0.03        | 4.02E-02       |
| SCG2    | 4           | 4                 | 0.15          | 0.12        | 2.32E-01       |
| SCGN    | 5           | 5                 | 0.20          | 0.05        | 4.09E-05       |
| SELE    | 9           | 8                 | -0.09         | 0.01        | 3.79E-14       |
| SEMA3F  | 5           | 4                 | -0.07         | 0.08        | 3.57E-01       |
| SEMA4C  | 5           | 5                 | -0.25         | 0.04        | 2.42E-08       |
| SFTPA2  | 6           | 6                 | 0.07          | 0.02        | 1.83E-05       |
| SFTPD   | 11          | 9                 | -0.07         | 0.01        | 3.26E-09       |
| TGFBR2  | 8           | 7                 | -0.05         | 0.07        | 4.95E-01       |

The results for proteins with number of SNPs less than 3 are omitted.

**Supplementary Table 11. Sensitivity analysis of genetically predicted proteins with COVID-19 infection using MR-SPI.**

| <b>Protein</b> | <b>No. of SNPs</b> | <b>No. of valid SNPs</b> | <b>BETA (MR-SPI)</b> | <b>SE (MR-SPI)</b> | <b>P-val (MR-SPI)</b> |
|----------------|--------------------|--------------------------|----------------------|--------------------|-----------------------|
| ADAM15         | 8                  | 7                        | 0.03                 | 0.01               | 1.57E-09              |
| ADGRG1         | 10                 | 9                        | -0.02                | 0.02               | 3.00E-01              |
| ADGRG2         | 6                  | 4                        | 0.04                 | 0.04               | 2.76E-01              |
| AMY2A          | 8                  | 6                        | 0.00                 | 0.01               | 9.70E-01              |
| AMY2B          | 9                  | 7                        | 0.00                 | 0.01               | 8.96E-01              |
| BST2           | 11                 | 9                        | -0.02                | 0.02               | 3.13E-01              |
| CA4            | 11                 | 10                       | 0.00                 | 0.01               | 7.67E-01              |
| CCL15          | 4                  | 3                        | -0.10                | 0.05               | 4.49E-02              |
| CCL28          | 18                 | 17                       | -0.01                | 0.02               | 3.55E-01              |
| CD109          | 6                  | 5                        | -0.01                | 0.04               | 8.30E-01              |
| CD209          | 8                  | 8                        | 0.11                 | 0.01               | 8.13E-76              |
| CD34           | 3                  | 2                        | 0.02                 | 0.04               | 5.63E-01              |
| CD58           | 12                 | 11                       | -0.02                | 0.01               | 2.66E-01              |
| CDH17          | 12                 | 11                       | 0.08                 | 0.01               | 4.59E-15              |
| CKMT1A_CKMT1B  | 8                  | 6                        | 0.02                 | 0.03               | 5.17E-01              |
| CLEC14A        | 9                  | 7                        | -0.01                | 0.03               | 6.32E-01              |
| CTSS           | 7                  | 6                        | -0.11                | 0.03               | 1.73E-04              |
| CX3CL1         | 8                  | 6                        | 0.03                 | 0.04               | 3.79E-01              |
| DPP10          | 5                  | 4                        | -0.01                | 0.02               | 5.21E-01              |
| DRAXIN         | 17                 | 16                       | -0.04                | 0.01               | 2.21E-03              |
| EFNA1          | 4                  | 4                        | 0.09                 | 0.01               | 1.01E-10              |
| F2R            | 8                  | 7                        | -0.02                | 0.02               | 3.01E-01              |
| FCGR2B         | 4                  | 3                        | -0.01                | 0.01               | 6.02E-01              |
| FGF19          | 5                  | 5                        | 0.13                 | 0.02               | 1.22E-15              |
| FGFR2          | 8                  | 7                        | 0.01                 | 0.03               | 7.29E-01              |
| FLT4           | 12                 | 11                       | 0.00                 | 0.01               | 6.78E-01              |
| FOLR1          | 8                  | 5                        | -0.05                | 0.03               | 1.18E-01              |
| GKN1           | 4                  | 4                        | 0.47                 | 0.06               | 6.15E-16              |
| GOLM2          | 8                  | 6                        | 0.02                 | 0.02               | 2.22E-01              |
| ICAM2          | 10                 | 8                        | 0.00                 | 0.01               | 6.79E-01              |
| ICAM5          | 7                  | 6                        | -0.01                | 0.01               | 8.60E-02              |
| IDS            | 3                  | 2                        | -0.01                | 0.02               | 5.18E-01              |
| ISLR2          | 8                  | 6                        | -0.02                | 0.02               | 2.58E-01              |
| ITGA6          | 7                  | 6                        | -0.03                | 0.02               | 5.95E-02              |
| ITGB1          | 7                  | 6                        | 0.00                 | 0.02               | 8.30E-01              |
| KEL            | 17                 | 14                       | 0.00                 | 0.01               | 6.26E-01              |
| KLK1           | 13                 | 12                       | 0.01                 | 0.02               | 5.11E-01              |
| LEFTY2         | 3                  | 2                        | -0.03                | 0.06               | 6.71E-01              |
| MUC13          | 4                  | 3                        | -0.02                | 0.02               | 2.47E-01              |
| NELL2          | 15                 | 13                       | -0.03                | 0.02               | 1.85E-01              |
| NME3           | 14                 | 12                       | -0.01                | 0.01               | 5.66E-01              |
| NRCAM          | 7                  | 6                        | -0.04                | 0.03               | 1.44E-01              |
| PECAM1         | 8                  | 8                        | -0.01                | 0.02               | 8.32E-01              |
| PLAT           | 4                  | 4                        | -0.24                | 0.05               | 1.62E-06              |
| PODXL          | 6                  | 5                        | -0.02                | 0.01               | 1.59E-01              |
| PTPRM          | 8                  | 7                        | -0.11                | 0.01               | 4.97E-43              |
| REG1A          | 6                  | 4                        | 0.03                 | 0.01               | 4.30E-02              |
| REG1B          | 7                  | 5                        | 0.01                 | 0.01               | 2.62E-01              |

|         |    |    |       |      |          |
|---------|----|----|-------|------|----------|
| S100A16 | 3  | 2  | 0.02  | 0.04 | 6.09E-01 |
| SCARF2  | 8  | 7  | -0.03 | 0.01 | 3.07E-02 |
| SCG2    | 4  | 2  | -0.10 | 0.06 | 8.04E-02 |
| SEMA3F  | 6  | 5  | -0.01 | 0.04 | 8.91E-01 |
| SEMA4C  | 6  | 5  | -0.02 | 0.04 | 6.01E-01 |
| SFTPD   | 12 | 10 | -0.03 | 0.01 | 5.31E-06 |
| SLITRK2 | 11 | 11 | 0.09  | 0.02 | 1.23E-05 |
| SPINK5  | 7  | 6  | -0.02 | 0.01 | 1.34E-01 |
| STC1    | 6  | 5  | 0.03  | 0.03 | 3.91E-01 |
| TGFBR2  | 8  | 7  | -0.02 | 0.03 | 4.77E-01 |
| ULBP2   | 8  | 7  | 0.00  | 0.01 | 8.05E-01 |

The results for proteins with number of SNPs less than 3 are omitted.

**Supplementary Table 12. Sensitivity analysis of genetically predicted proteins with severe COVID-19 using the cis-SNPs only.**

| <b>Protein</b> | <b>BETA (cis SNPs)</b> | <b>SE (cis SNPs)</b> | <b>P-val (cis SNPs)</b> |
|----------------|------------------------|----------------------|-------------------------|
| ADGRG2         | NA                     | NA                   | NA                      |
| AMY2B          | -0.08                  | 0.04                 | 2.32E-02                |
| CCL15          | NA                     | NA                   | NA                      |
| CD109          | NA                     | NA                   | NA                      |
| CD209          | 0.08                   | 0.04                 | 6.45E-02                |
| CD34           | NA                     | NA                   | NA                      |
| CDH15          | 0.31                   | 0.05                 | 4.55E-11                |
| CKMT1A_CKMT1B  | NA                     | NA                   | NA                      |
| CX3CL1         | NA                     | NA                   | NA                      |
| ERBB4          | -0.15                  | 0.08                 | 7.59E-02                |
| FGF19          | NA                     | NA                   | NA                      |
| GOLM2          | NA                     | NA                   | NA                      |
| ICAM5          | -0.09                  | 0.02                 | 1.80E-05                |
| ISLR2          | -0.08                  | 0.07                 | 2.71E-01                |
| KEL            | -0.04                  | 0.06                 | 4.55E-01                |
| KLK1           | -0.10                  | 0.02                 | 2.42E-10                |
| LAMP3          | -0.09                  | 0.10                 | 3.63E-01                |
| LEFTY2         | NA                     | NA                   | NA                      |
| LGALS4         | -0.31                  | 0.22                 | 1.66E-01                |
| LGALS8         | -0.01                  | 0.05                 | 8.01E-01                |
| MNDA           | NA                     | NA                   | NA                      |
| MUC13          | -0.02                  | 0.07                 | 7.64E-01                |
| NRCAM          | NA                     | NA                   | NA                      |
| PECAM1         | NA                     | NA                   | NA                      |
| PODXL          | -0.01                  | 0.06                 | 8.97E-01                |
| PTPRM          | -0.37                  | 0.22                 | 8.93E-02                |
| REG1A          | 0.10                   | 0.06                 | 8.88E-02                |
| REG1B          | 0.08                   | 0.04                 | 8.88E-02                |
| SCG2           | NA                     | NA                   | NA                      |
| SCGN           | 0.18                   | 0.17                 | 2.85E-01                |
| SEMA4C         | NA                     | NA                   | NA                      |
| SFTPD          | -0.09                  | 0.02                 | 8.14E-07                |
| TDGF1          | NA                     | NA                   | NA                      |

|       |       |      |          |
|-------|-------|------|----------|
| VAMP5 | 0.16  | 0.20 | 4.24E-01 |
| VTCN1 | -0.02 | 0.28 | 9.56E-01 |

The results for proteins without cis-SNPs are filled with NA values.

**Supplementary Table 13. Sensitivity analysis of genetically predicted proteins with COVID-19 hospitalization using the cis-SNPs only.**

| Protein | BETA (cis SNPs) | SE (cis SNPs) | P-val (cis SNPs) |
|---------|-----------------|---------------|------------------|
| ADGRG1  | -0.31           | 0.15          | 3.57E-02         |
| ADGRG2  | NA              | NA            | NA               |
| AMY2A   | -0.04           | 0.03          | 1.95E-01         |
| AMY2B   | -0.04           | 0.02          | 8.00E-02         |
| CA4     | 0.04            | 0.03          | 1.68E-01         |
| CCL15   | NA              | NA            | NA               |
| CD109   | NA              | NA            | NA               |
| CD209   | 0.05            | 0.03          | 1.33E-01         |
| CD34    | NA              | NA            | NA               |
| CDH15   | 0.17            | 0.03          | 4.43E-08         |
| CLEC14A | NA              | NA            | NA               |
| CTSS    | NA              | NA            | NA               |
| CX3CL1  | NA              | NA            | NA               |
| EFNA1   | 0.13            | 0.03          | 1.55E-05         |
| ERBB4   | -0.05           | 0.06          | 3.52E-01         |
| FGF19   | NA              | NA            | NA               |
| GOLM2   | NA              | NA            | NA               |
| GP2     | 0.00            | 0.04          | 9.30E-01         |
| ICAM2   | NA              | NA            | NA               |
| ICAM5   | -0.04           | 0.01          | 2.52E-03         |
| ISLR2   | -0.05           | 0.05          | 2.78E-01         |
| KLK1    | -0.06           | 0.01          | 2.65E-08         |
| LEFTY2  | NA              | NA            | NA               |
| LGALS4  | -0.05           | 0.12          | 6.60E-01         |
| MET     | -0.02           | 0.08          | 8.05E-01         |
| NELL2   | NA              | NA            | NA               |
| NRCAM   | NA              | NA            | NA               |
| PECAM1  | NA              | NA            | NA               |
| PODXL   | -0.05           | 0.04          | 2.45E-01         |
| PRSS27  | -0.03           | 0.06          | 6.77E-01         |
| PTPRM   | -0.25           | 0.15          | 1.09E-01         |
| REG1A   | 0.08            | 0.04          | 5.68E-02         |
| REG1B   | 0.06            | 0.03          | 5.68E-02         |
| SCG2    | NA              | NA            | NA               |
| SCGN    | 0.11            | 0.12          | 3.38E-01         |
| SELE    | -0.03           | 0.12          | 7.85E-01         |
| SEMA3F  | NA              | NA            | NA               |
| SEMA4C  | NA              | NA            | NA               |
| SFTPA2  | 0.07            | 0.02          | 1.30E-05         |
| SFTPD   | -0.07           | 0.01          | 1.40E-07         |
| TDGF1   | NA              | NA            | NA               |



|        |      |      |          |
|--------|------|------|----------|
| TGFBR2 | NA   | NA   | NA       |
| VAMP5  | 0.14 | 0.14 | 3.37E-01 |

The results for proteins without cis-SNPs are filled with NA values.

**Supplementary Table 14. Sensitivity analysis of genetically predicted proteins with COVID-19 infection using the cis-SNPs only.**

| <b>Protein</b> | <b>BETA (cis SNPs)</b> | <b>SE (cis SNPs)</b> | <b>P-val (cis SNPs)</b> |
|----------------|------------------------|----------------------|-------------------------|
| ADAM15         | 0.03                   | 0.01                 | 4.44E-08                |
| ADGRG1         | -0.03                  | 0.07                 | 6.93E-01                |
| ADGRG2         | NA                     | NA                   | NA                      |
| AMY2A          | -0.01                  | 0.01                 | 6.83E-01                |
| AMY2B          | -0.01                  | 0.01                 | 3.94E-01                |
| BST2           | 0.00                   | 0.03                 | 9.13E-01                |
| CA4            | 0.00                   | 0.01                 | 8.81E-01                |
| CCL15          | NA                     | NA                   | NA                      |
| CCL28          | NA                     | NA                   | NA                      |
| CD109          | NA                     | NA                   | NA                      |
| CD209          | 0.02                   | 0.01                 | 8.28E-02                |
| CD34           | NA                     | NA                   | NA                      |
| CD58           | -0.02                  | 0.03                 | 4.40E-01                |
| CDH17          | NA                     | NA                   | NA                      |
| CKMT1A_CKMT1B  | 0.02                   | 0.05                 | 6.82E-01                |
| CLEC14A        | NA                     | NA                   | NA                      |
| CTSS           | NA                     | NA                   | NA                      |
| CX3CL1         | NA                     | NA                   | NA                      |
| DPP10          | -0.02                  | 0.02                 | 3.90E-01                |
| DRAXIN         | -0.05                  | 0.02                 | 9.96E-03                |
| EFNA1          | 0.10                   | 0.01                 | 6.46E-12                |
| F2R            | -0.01                  | 0.04                 | 8.88E-01                |
| FCGR2B         | -0.01                  | 0.01                 | 4.67E-01                |
| FGF19          | NA                     | NA                   | NA                      |
| FGFR2          | 0.01                   | 0.04                 | 7.20E-01                |
| FLT4           | -0.02                  | 0.02                 | 2.91E-01                |
| FOLR1          | -0.12                  | 0.08                 | 1.27E-01                |
| GKN1           | NA                     | NA                   | NA                      |
| GOLM2          | NA                     | NA                   | NA                      |
| ICAM2          | NA                     | NA                   | NA                      |
| ICAM5          | -0.01                  | 0.01                 | 1.39E-01                |
| IDS            | NA                     | NA                   | NA                      |
| ISLR2          | -0.04                  | 0.02                 | 1.05E-01                |
| ITGA6          | -0.03                  | 0.02                 | 1.29E-01                |
| ITGB1          | NA                     | NA                   | NA                      |
| KEL            | 0.00                   | 0.02                 | 8.64E-01                |
| KLK1           | -0.04                  | 0.01                 | 1.21E-14                |
| LEFTY2         | NA                     | NA                   | NA                      |
| MNDA           | NA                     | NA                   | NA                      |
| MUC13          | -0.03                  | 0.02                 | 1.11E-01                |
| NELL2          | NA                     | NA                   | NA                      |
| NME3           | -0.03                  | 0.03                 | 3.89E-01                |
| NRCAM          | NA                     | NA                   | NA                      |

|         |       |      |          |
|---------|-------|------|----------|
| PECAM1  | NA    | NA   | NA       |
| PLAT    | -0.03 | 0.06 | 6.39E-01 |
| PODXL   | -0.04 | 0.02 | 3.86E-02 |
| PTPRM   | -0.03 | 0.07 | 6.20E-01 |
| REG1A   | 0.01  | 0.02 | 4.95E-01 |
| REG1B   | 0.01  | 0.01 | 4.95E-01 |
| S100A16 | 0.02  | 0.05 | 7.45E-01 |
| SCARF2  | -0.03 | 0.02 | 4.90E-02 |
| SCG2    | NA    | NA   | NA       |
| SEMA3F  | NA    | NA   | NA       |
| SEMA4C  | NA    | NA   | NA       |
| SFTPD   | -0.03 | 0.01 | 5.36E-07 |
| SLITRK2 | NA    | NA   | NA       |
| SPINK5  | -0.02 | 0.01 | 1.93E-01 |
| STC1    | -0.07 | 0.08 | 3.52E-01 |
| TDGF1   | NA    | NA   | NA       |
| TGFBR2  | NA    | NA   | NA       |
| ULBP2   | 0.01  | 0.01 | 6.55E-01 |
| VAMP5   | 0.15  | 0.08 | 5.59E-02 |
| VTCN1   | -0.11 | 0.06 | 9.55E-02 |

The results for proteins without cis-SNPs are filled with NA values.

**Supplementary Table 19. Sensitivity analysis of genetically predicted proteins with healthspan using the weighted mode and weighted median methods.**

| Protein | No. of SNPs | BETA (Weighted Mode) | SE (Weighted Mode) | P-val (Weighted Mode) | BETA (Weighted Median) | SE (Weighted Median) | P-val (Weighted Median) |
|---------|-------------|----------------------|--------------------|-----------------------|------------------------|----------------------|-------------------------|
| FOXO3   | 1           | NA                   | NA                 | NA                    | NA                     | NA                   | NA                      |
| GPNMB   | 6           | 0.43                 | 0.14               | 2.59E-03              | 0.44                   | 0.14                 | 1.96E-03                |
| HLA-DRA | 3           | -0.41                | 0.09               | 4.89E-06              | -0.42                  | 0.09                 | 3.67E-06                |
| PLA2G7  | 8           | -0.30                | 0.67               | 6.51E-01              | -1.26                  | 0.40                 | 1.80E-03                |

The results for proteins with number of SNPs less than 3 are filled with NA values.

**Supplementary Table 20. Sensitivity analysis of genetically predicted proteins with father's attained age using the weighted mode and weighted median methods.**

| Protein  | No. of SNPs | BETA (Weighted Mode) | SE (Weighted Mode) | P-val (Weighted Mode) | BETA (Weighted Median) | SE (Weighted Median) | P-val (Weighted Median) |
|----------|-------------|----------------------|--------------------|-----------------------|------------------------|----------------------|-------------------------|
| AGRP     | 9           | -0.74                | 0.41               | 7.16E-02              | -0.83                  | 0.35                 | 1.83E-02                |
| CA11     | 2           | NA                   | NA                 | NA                    | NA                     | NA                   | NA                      |
| CCN1     | 11          | -0.34                | 0.38               | 3.59E-01              | -0.40                  | 0.31                 | 2.01E-01                |
| CD27     | 7           | -0.46                | 0.18               | 1.09E-02              | -0.54                  | 0.18                 | 1.94E-03                |
| CD74     | 6           | -0.29                | 0.23               | 1.98E-01              | -0.32                  | 0.23                 | 1.54E-01                |
| CDH1     | 6           | 0.34                 | 0.09               | 7.10E-05              | 0.35                   | 0.09                 | 6.90E-05                |
| CEACAM21 | 2           | NA                   | NA                 | NA                    | NA                     | NA                   | NA                      |
| CPE      | 6           | 1.32                 | 0.42               | 1.54E-03              | 1.35                   | 0.37                 | 2.83E-04                |
| CXCL13   | 7           | -0.40                | 0.36               | 2.73E-01              | -0.75                  | 0.40                 | 6.28E-02                |
| CXCL9    | 5           | -0.46                | 0.32               | 1.52E-01              | -1.09                  | 0.36                 | 2.13E-03                |
| F3       | 8           | 0.47                 | 0.12               | 1.01E-04              | 0.49                   | 0.12                 | 8.17E-05                |

|         |    |       |      |          |       |      |          |
|---------|----|-------|------|----------|-------|------|----------|
| FASLG   | 18 | -0.20 | 0.15 | 1.87E-01 | -0.25 | 0.15 | 7.99E-02 |
| FES     | 1  | NA    | NA   | NA       | NA    | NA   | NA       |
| FURIN   | 3  | -1.32 | 0.24 | 7.34E-08 | -1.03 | 0.22 | 3.57E-06 |
| GCNT1   | 4  | -2.15 | 0.33 | 1.27E-10 | -1.81 | 0.39 | 2.73E-06 |
| GP1BA   | 14 | -0.03 | 0.30 | 9.16E-01 | -0.12 | 0.24 | 6.10E-01 |
| GRN     | 10 | -0.41 | 0.07 | 2.41E-08 | -0.38 | 0.07 | 2.35E-07 |
| GZMB    | 8  | -0.56 | 0.29 | 5.12E-02 | -0.58 | 0.27 | 3.36E-02 |
| IGFBP1  | 2  | NA    | NA   | NA       | NA    | NA   | NA       |
| KIR2DL3 | 2  | NA    | NA   | NA       | NA    | NA   | NA       |
| LAIR1   | 3  | -0.72 | 0.71 | 3.13E-01 | -1.63 | 0.82 | 4.61E-02 |
| LDLR    | 15 | -1.00 | 0.26 | 9.71E-05 | -0.96 | 0.22 | 1.46E-05 |
| LEFTY2  | 3  | 1.74  | 0.58 | 2.96E-03 | 2.21  | 0.73 | 2.39E-03 |
| LGALS9  | 3  | -1.43 | 1.03 | 1.67E-01 | -1.77 | 0.56 | 1.66E-03 |
| LILRB4  | 2  | NA    | NA   | NA       | NA    | NA   | NA       |
| PAG1    | 6  | -0.56 | 0.43 | 1.95E-01 | -0.63 | 0.40 | 1.19E-01 |
| PCSK9   | 8  | -0.48 | 0.14 | 6.45E-04 | -0.49 | 0.14 | 4.77E-04 |
| POLR2F  | 1  | NA    | NA   | NA       | NA    | NA   | NA       |
| RP2     | 2  | NA    | NA   | NA       | NA    | NA   | NA       |
| SIT1    | 6  | -0.30 | 0.64 | 6.39E-01 | -0.75 | 0.40 | 5.84E-02 |
| VCAM1   | 10 | -0.42 | 0.82 | 6.08E-01 | -0.76 | 0.30 | 1.22E-02 |
| VSTM2L  | 2  | NA    | NA   | NA       | NA    | NA   | NA       |

The results for proteins with number of SNPs less than 3 are filled with NA values.

**Supplementary Table 21. Sensitivity analysis of genetically predicted proteins with mother's attained age using the weighted mode and weighted median methods.**

| Protein | No. of SNPs | BETA (Weighted Mode) | SE (Weighted Mode) | P-val (Weighted Mode) | BETA (Weighted Median) | SE (Weighted Median) | P-val (Weighted Median) |
|---------|-------------|----------------------|--------------------|-----------------------|------------------------|----------------------|-------------------------|
| CDH1    | 6           | 0.50                 | 0.09               | 1.35E-08              | 0.50                   | 0.09                 | 2.03E-08                |
| CDH17   | 10          | 0.36                 | 0.08               | 1.05E-05              | 0.31                   | 0.10                 | 2.07E-03                |
| CDHR2   | 6           | -0.17                | 0.49               | 7.36E-01              | 0.05                   | 0.48                 | 9.22E-01                |
| CPE     | 6           | 0.54                 | 0.42               | 1.98E-01              | 0.67                   | 0.38                 | 8.17E-02                |
| CXADR   | 5           | 1.06                 | 0.23               | 4.07E-06              | 1.10                   | 0.23                 | 1.41E-06                |
| CXCL9   | 5           | -0.32                | 0.45               | 4.75E-01              | -0.90                  | 0.36                 | 1.20E-02                |
| F3      | 8           | 0.69                 | 0.12               | 1.71E-08              | 0.71                   | 0.13                 | 2.46E-08                |
| FOXO3   | 1           | NA                   | NA                 | NA                    | NA                     | NA                   | NA                      |
| GFAP    | 7           | -0.06                | 0.38               | 8.85E-01              | -0.21                  | 0.32                 | 5.16E-01                |
| IL19    | 3           | -0.41                | 0.11               | 1.11E-04              | -0.40                  | 0.10                 | 3.29E-05                |
| ITGB6   | 9           | 0.52                 | 0.16               | 1.47E-03              | 0.53                   | 0.16                 | 6.94E-04                |
| LAIR1   | 3           | -1.21                | 1.06               | 2.53E-01              | -2.01                  | 0.88                 | 2.32E-02                |
| LEFTY2  | 3           | 2.09                 | 0.77               | 6.45E-03              | 2.54                   | 0.57                 | 1.03E-05                |
| LGALS9  | 3           | -2.64                | 0.51               | 1.99E-07              | -2.46                  | 0.49                 | 4.59E-07                |
| LILRB4  | 2           | NA                   | NA                 | NA                    | NA                     | NA                   | NA                      |
| POLR2F  | 1           | NA                   | NA                 | NA                    | NA                     | NA                   | NA                      |
| RP2     | 2           | NA                   | NA                 | NA                    | NA                     | NA                   | NA                      |
| STC2    | 4           | -0.92                | 0.65               | 1.55E-01              | -1.13                  | 0.56                 | 4.34E-02                |
| TNFRSF8 | 7           | -0.50                | 0.22               | 2.03E-02              | -0.56                  | 0.22                 | 9.55E-03                |

The results for proteins with number of SNPs less than 3 are filled with NA values.

**Supplementary Table 22. Sensitivity analysis of genetically predicted proteins with healthspan using MR-SPI.**

| Protein | No. of SNPs | No. of valid SNPs | BETA (MR-SPI) | SE (MR-SPI) | P-val (MR-SPI) |
|---------|-------------|-------------------|---------------|-------------|----------------|
| GPNMB   | 6           | 5                 | 0.31          | 0.13        | 2.22E-02       |
| HLA-DRA | 3           | 3                 | -0.42         | 0.09        | 3.16E-06       |
| PLA2G7  | 8           | 8                 | -1.20         | 0.27        | 8.80E-06       |

The results for proteins with number of SNPs less than 3 are omitted.

**Supplementary Table 23. Sensitivity analysis of genetically predicted proteins with father's attained age using MR-SPI.**

| Protein | No. of SNPs | No. of valid SNPs | BETA (MR-SPI) | SE (MR-SPI) | P-val (MR-SPI) |
|---------|-------------|-------------------|---------------|-------------|----------------|
| AGRP    | 9           | 7                 | -0.93         | 0.26        | 2.94E-04       |
| CCN1    | 11          | 8                 | -0.49         | 0.22        | 2.49E-02       |
| CD27    | 7           | 6                 | -0.49         | 0.17        | 2.92E-03       |
| CD74    | 6           | 5                 | -0.18         | 0.19        | 3.51E-01       |
| CDH1    | 6           | 6                 | 0.37          | 0.08        | 8.32E-06       |
| CPE     | 6           | 5                 | 0.91          | 0.28        | 1.33E-03       |
| CXCL13  | 7           | 6                 | -0.94         | 0.28        | 8.23E-04       |
| CXCL9   | 5           | 4                 | -0.67         | 0.26        | 9.59E-03       |
| F3      | 8           | 8                 | 0.43          | 0.11        | 3.54E-05       |
| FASLG   | 18          | 17                | -0.17         | 0.11        | 1.31E-01       |
| FURIN   | 3           | 3                 | -1.05         | 0.21        | 3.14E-07       |
| GCNT1   | 4           | 4                 | -2.19         | 0.32        | 5.14E-12       |
| GP1BA   | 14          | 13                | -0.24         | 0.17        | 1.63E-01       |
| GRN     | 10          | 10                | -0.36         | 0.07        | 3.06E-08       |
| GZMB    | 8           | 7                 | -0.56         | 0.22        | 1.02E-02       |
| LAIR1   | 3           | 2                 | -0.71         | 0.64        | 2.69E-01       |
| LDLR    | 15          | 13                | -1.21         | 0.16        | 2.68E-14       |
| LEFTY2  | 3           | 3                 | 4.15          | 0.65        | 1.64E-10       |
| LGALS9  | 3           | 3                 | -2.82         | 0.42        | 2.88E-11       |
| PAG1    | 6           | 5                 | -0.45         | 0.29        | 1.16E-01       |
| PCSK9   | 8           | 7                 | -0.54         | 0.13        | 3.34E-05       |
| SIT1    | 6           | 5                 | -0.10         | 0.29        | 7.17E-01       |
| VCAM1   | 10          | 8                 | -0.05         | 0.19        | 8.14E-01       |

The results for proteins with number of SNPs less than 3 are omitted.

**Supplementary Table 24. Sensitivity analysis of genetically predicted proteins with mother's attained age using MR-SPI.**

| Protein | No. of SNPs | No. of valid SNPs | BETA (MR-SPI) | SE (MR-SPI) | P-val (MR-SPI) |
|---------|-------------|-------------------|---------------|-------------|----------------|
| CDH1    | 6           | 6                 | 0.53          | 0.08        | 3.84E-10       |
| CDH17   | 10          | 10                | 0.37          | 0.07        | 3.96E-07       |
| CDHR2   | 6           | 5                 | -0.05         | 0.36        | 8.89E-01       |
| CPE     | 6           | 6                 | 1.23          | 0.26        | 2.27E-06       |
| CXADR   | 5           | 5                 | 0.79          | 0.18        | 9.95E-06       |
| CXCL9   | 5           | 5                 | -1.65         | 0.29        | 8.56E-09       |
| F3      | 8           | 8                 | 0.64          | 0.11        | 1.60E-09       |
| GFAP    | 7           | 6                 | -0.23         | 0.25        | 3.43E-01       |

|         |   |   |       |      |          |
|---------|---|---|-------|------|----------|
| IL19    | 3 | 3 | -0.39 | 0.09 | 2.37E-05 |
| ITGB6   | 9 | 8 | 0.51  | 0.14 | 2.86E-04 |
| LAIR1   | 3 | 3 | -2.28 | 0.56 | 4.09E-05 |
| LEFTY2  | 3 | 3 | 2.65  | 0.46 | 7.68E-09 |
| LGALS9  | 3 | 2 | -2.65 | 0.42 | 2.34E-10 |
| STC2    | 4 | 4 | -1.66 | 0.42 | 6.53E-05 |
| TNFRSF8 | 7 | 7 | -0.33 | 0.18 | 6.78E-02 |

The results for proteins with number of SNPs less than 3 are omitted.

**Supplementary Table 25. Sensitivity analysis of genetically predicted proteins with healthspan using the cis-SNPs only.**

| Protein | BETA (cis SNPs) | SE (cis SNPs) | P-val (cis SNPs) |
|---------|-----------------|---------------|------------------|
| FOXO3   | NA              | NA            | NA               |
| GPNMB   | 0.47            | 0.15          | 1.28E-03         |
| HLA-DRA | -0.40           | 0.09          | 9.04E-06         |
| PLA2G7  | NA              | NA            | NA               |

The results for proteins without cis-SNPs are filled with NA values.

**Supplementary Table 26. Sensitivity analysis of genetically predicted proteins with father's attained age using the cis-SNPs only.**

| Protein  | BETA (cis SNPs) | SE (cis SNPs) | P-val (cis SNPs) |
|----------|-----------------|---------------|------------------|
| AGRP     | -0.07           | 0.60          | 9.01E-01         |
| CA11     | NA              | NA            | NA               |
| CCN1     | -0.16           | 0.42          | 7.08E-01         |
| CD27     | -0.52           | 0.18          | 3.53E-03         |
| CD74     | -0.23           | 0.81          | 7.80E-01         |
| CDH1     | NA              | NA            | NA               |
| CEACAM21 | NA              | NA            | NA               |
| CPE      | NA              | NA            | NA               |
| CXCL13   | -0.80           | 0.86          | 3.53E-01         |
| CXCL9    | -0.50           | 0.35          | 1.55E-01         |
| F3       | 0.28            | 0.24          | 2.59E-01         |
| FASLG    | -0.99           | 0.60          | 9.87E-02         |
| FES      | 1.78            | 0.33          | 4.80E-08         |
| FURIN    | -1.32           | 0.24          | 2.69E-08         |
| GCNT1    | NA              | NA            | NA               |
| GP1BA    | NA              | NA            | NA               |
| GRN      | -0.19           | 0.19          | 3.19E-01         |
| GZMB     | NA              | NA            | NA               |
| IGFBP1   | NA              | NA            | NA               |
| KIR2DL3  | NA              | NA            | NA               |
| LAIR1    | NA              | NA            | NA               |
| LDLR     | NA              | NA            | NA               |
| LEFTY2   | NA              | NA            | NA               |
| LGALS9   | NA              | NA            | NA               |
| LILRB4   | NA              | NA            | NA               |
| PAG1     | -0.64           | 0.61          | 2.91E-01         |
| PCSK9    | -0.44           | 0.14          | 2.25E-03         |

|        |       |      |          |
|--------|-------|------|----------|
| POLR2F | NA    | NA   | NA       |
| RP2    | NA    | NA   | NA       |
| SIT1   | NA    | NA   | NA       |
| VCAM1  | NA    | NA   | NA       |
| VSTM2L | -0.04 | 0.39 | 9.23E-01 |

The results for proteins without cis-SNPs are filled with NA values.

**Supplementary Table 27. Sensitivity analysis of genetically predicted proteins with mother's attained age using the cis-SNPs only.**

| Protein | BETA (cis SNPs) | SE (cis SNPs) | P-val (cis SNPs) |
|---------|-----------------|---------------|------------------|
| CDH1    | NA              | NA            | NA               |
| CDH17   | NA              | NA            | NA               |
| CDHR2   | NA              | NA            | NA               |
| CPE     | NA              | NA            | NA               |
| CXADR   | 0.85            | 0.38          | 2.54E-02         |
| CXCL9   | -0.07           | 0.35          | 8.32E-01         |
| F3      | 0.30            | 0.24          | 2.22E-01         |
| FOXO3   | NA              | NA            | NA               |
| GFAP    | -0.16           | 0.54          | 7.67E-01         |
| IL19    | -0.18           | 0.15          | 2.31E-01         |
| ITGB6   | 0.49            | 0.16          | 3.17E-03         |
| LAIR1   | NA              | NA            | NA               |
| LEFTY2  | NA              | NA            | NA               |
| LGALS9  | NA              | NA            | NA               |
| LILRB4  | NA              | NA            | NA               |
| POLR2F  | NA              | NA            | NA               |
| RP2     | NA              | NA            | NA               |
| STC2    | NA              | NA            | NA               |
| TNFRSF8 | -0.36           | 0.21          | 9.29E-02         |

The results for proteins without cis-SNPs are filled with NA values.

**Supplementary Table 28. Heterogeneity test of protein on severe COVID.**

| Protein       | No. of SNPs | Q statistic | P-val of Q statistic |
|---------------|-------------|-------------|----------------------|
| ADGRG2        | 6           | 42.14       | 5.51E-08             |
| AMY2B         | 9           | 72.35       | 1.67E-12             |
| CCL15         | 4           | 11.65       | 8.70E-03             |
| CD109         | 6           | 6.06        | 3.01E-01             |
| CD209         | 8           | 11.84       | 1.06E-01             |
| CD34          | 3           | 3.65        | 1.61E-01             |
| CDH15         | 4           | 2.48        | 4.79E-01             |
| CKMT1A_CKMT1B | 6           | 26.02       | 8.86E-05             |
| CX3CL1        | 7           | 43.16       | 1.09E-07             |
| ERBB4         | 16          | 44.94       | 7.82E-05             |
| FGF19         | 5           | 11.67       | 1.99E-02             |
| GOLM2         | 9           | 62.23       | 1.70E-10             |
| ICAM5         | 6           | 16.57       | 5.38E-03             |
| ISLR2         | 8           | 23.48       | 1.40E-03             |
| KEL           | 16          | 72.11       | 1.88E-09             |

|        |    |        |          |
|--------|----|--------|----------|
| KLK1   | 13 | 42.97  | 2.28E-05 |
| LAMP3  | 10 | 144.56 | 1.18E-26 |
| LEFTY2 | 4  | 22.69  | 4.69E-05 |
| LGALS4 | 3  | 5.58   | 6.14E-02 |
| LGALS8 | 6  | 15.10  | 9.96E-03 |
| MNDA   | 1  | NA     | NA       |
| MUC13  | 4  | 24.43  | 2.03E-05 |
| NRCAM  | 6  | 27.86  | 3.88E-05 |
| PECAM1 | 8  | 13.05  | 7.08E-02 |
| PODXL  | 6  | 14.95  | 1.06E-02 |
| PTPRM  | 8  | 30.44  | 7.87E-05 |
| REG1A  | 5  | 35.36  | 3.91E-07 |
| REG1B  | 7  | 49.90  | 4.93E-09 |
| SCG2   | 4  | 31.72  | 6.01E-07 |
| SCGN   | 5  | 16.97  | 1.96E-03 |
| SEMA4C | 4  | 3.36   | 3.40E-01 |
| SFTPD  | 11 | 98.80  | 9.47E-17 |
| TDGF1  | 1  | NA     | NA       |
| VAMP5  | 2  | NA     | NA       |
| VTCN1  | 2  | NA     | NA       |

**Supplementary Table 29. Heterogeneity test of protein on COVID hospitalization.**

| <b>Protein</b> | <b>No. of SNPs</b> | <b>Q statistic</b> | <b>P-val of Q statistic</b> |
|----------------|--------------------|--------------------|-----------------------------|
| ADGRG1         | 9                  | 57.47              | 1.46E-09                    |
| ADGRG2         | 6                  | 92.04              | 2.50E-18                    |
| AMY2A          | 8                  | 95.88              | 7.64E-18                    |
| AMY2B          | 9                  | 99.13              | 6.44E-18                    |
| CA4            | 9                  | 77.39              | 1.64E-13                    |
| CCL15          | 4                  | 4.34               | 2.27E-01                    |
| CD109          | 6                  | 23.11              | 3.22E-04                    |
| CD209          | 8                  | 23.60              | 1.34E-03                    |
| CD34           | 3                  | 11.84              | 2.68E-03                    |
| CDH15          | 4                  | 6.17               | 1.04E-01                    |
| CLEC14A        | 8                  | 73.72              | 2.60E-13                    |
| CTSS           | 7                  | 84.18              | 4.89E-16                    |
| CX3CL1         | 7                  | 47.96              | 1.20E-08                    |
| EFNA1          | 4                  | 2.57               | 4.63E-01                    |
| ERBB4          | 16                 | 79.76              | 7.72E-11                    |
| FGF19          | 5                  | 13.19              | 1.04E-02                    |
| GOLM2          | 9                  | 89.74              | 5.25E-16                    |
| GP2            | 8                  | 86.98              | 5.15E-16                    |
| ICAM2          | 10                 | 70.56              | 1.18E-11                    |
| ICAM5          | 7                  | 42.99              | 1.17E-07                    |
| ISLR2          | 8                  | 41.26              | 7.22E-07                    |
| KLK1           | 13                 | 23.58              | 2.32E-02                    |
| LEFTY2         | 4                  | 28.70              | 2.59E-06                    |
| LGALS4         | 3                  | 7.15               | 2.81E-02                    |
| MET            | 20                 | 77.14              | 5.75E-09                    |
| NELL2          | 14                 | 89.19              | 2.00E-13                    |
| NRCAM          | 7                  | 53.77              | 8.22E-10                    |

|        |    |        |          |
|--------|----|--------|----------|
| PECAM1 | 8  | 26.75  | 3.69E-04 |
| PODXL  | 6  | 19.27  | 1.71E-03 |
| PRSS27 | 18 | 100.56 | 6.99E-14 |
| PTPRM  | 8  | 44.44  | 1.75E-07 |
| REG1A  | 5  | 69.14  | 3.46E-14 |
| REG1B  | 7  | 85.00  | 3.30E-16 |
| SCG2   | 4  | 55.74  | 4.78E-12 |
| SCGN   | 5  | 13.73  | 8.21E-03 |
| SELE   | 9  | 52.18  | 1.55E-08 |
| SEMA3F | 5  | 47.19  | 1.39E-09 |
| SEMA4C | 5  | 18.87  | 8.34E-04 |
| SFTPA2 | 6  | 5.05   | 4.10E-01 |
| SFTPD  | 11 | 55.32  | 2.75E-08 |
| TDGF1  | 1  | NA     | NA       |
| TGFBR2 | 8  | 33.02  | 2.63E-05 |
| VAMP5  | 2  | NA     | NA       |

**Supplementary Table 30. Heterogeneity test of protein on SARS-CoV-2 infection.**

| <b>Protein</b> | <b>No. of SNPs</b> | <b><i>Q</i> statistic</b> | <b><i>P</i>-val of <i>Q</i> statistic</b> |
|----------------|--------------------|---------------------------|-------------------------------------------|
| ADAM15         | 8                  | 17.87                     | 1.26E-02                                  |
| ADGRG1         | 10                 | 180.92                    | 3.25E-34                                  |
| ADGRG2         | 6                  | 260.26                    | 3.46E-54                                  |
| AMY2A          | 8                  | 331.37                    | 1.19E-67                                  |
| AMY2B          | 9                  | 342.70                    | 3.28E-69                                  |
| BST2           | 11                 | 351.39                    | 2.02E-69                                  |
| CA4            | 11                 | 306.13                    | 7.87E-60                                  |
| CCL15          | 4                  | 30.43                     | 1.12E-06                                  |
| CCL28          | 18                 | 192.87                    | 7.72E-32                                  |
| CD109          | 6                  | 70.21                     | 9.24E-14                                  |
| CD209          | 8                  | 40.82                     | 8.77E-07                                  |
| CD34           | 3                  | 28.96                     | 5.16E-07                                  |
| CD58           | 12                 | 86.67                     | 7.46E-14                                  |
| CDH17          | 12                 | 391.15                    | 4.63E-77                                  |
| CKMT1A_CKMT1B  | 8                  | 161.54                    | 1.52E-31                                  |
| CLEC14A        | 9                  | 126.33                    | 1.63E-23                                  |
| CTSS           | 7                  | 275.64                    | 1.34E-56                                  |
| CX3CL1         | 8                  | 158.83                    | 5.66E-31                                  |
| DPP10          | 5                  | 190.95                    | 3.31E-40                                  |
| DRAXIN         | 17                 | 68.97                     | 1.51E-08                                  |
| EFNA1          | 4                  | 7.70                      | 5.27E-02                                  |
| F2R            | 8                  | 185.14                    | 1.60E-36                                  |
| FCGR2B         | 4                  | 310.89                    | 4.36E-67                                  |
| FGF19          | 5                  | 12.76                     | 1.25E-02                                  |
| FGFR2          | 8                  | 328.93                    | 3.98E-67                                  |
| FLT4           | 12                 | 203.99                    | 1.10E-37                                  |
| FOLR1          | 8                  | 109.09                    | 1.42E-20                                  |
| GKN1           | 4                  | 49.76                     | 8.98E-11                                  |
| GOLM2          | 8                  | 238.79                    | 6.71E-48                                  |
| ICAM2          | 10                 | 166.16                    | 3.89E-31                                  |
| ICAM5          | 7                  | 161.01                    | 3.62E-32                                  |



|         |    |        |          |
|---------|----|--------|----------|
| IDS     | 3  | 333.48 | 3.86E-73 |
| ISLR2   | 8  | 59.19  | 2.19E-10 |
| ITGA6   | 7  | 176.19 | 2.18E-35 |
| ITGB1   | 7  | 184.40 | 3.93E-37 |
| KEL     | 17 | 223.16 | 1.59E-38 |
| KLK1    | 13 | 67.09  | 1.12E-09 |
| LEFTY2  | 3  | 109.90 | 1.37E-24 |
| MNDA    | 1  | NA     | NA       |
| MUC13   | 4  | 109.02 | 1.78E-23 |
| NELL2   | 15 | 178.72 | 1.18E-30 |
| NME3    | 14 | 227.26 | 3.30E-41 |
| NRCAM   | 7  | 165.94 | 3.27E-33 |
| PECAM1  | 8  | 57.85  | 4.04E-10 |
| PLAT    | 4  | 16.33  | 9.69E-04 |
| PODXL   | 6  | 68.83  | 1.80E-13 |
| PTPRM   | 8  | 72.39  | 4.86E-13 |
| REG1A   | 6  | 291.32 | 7.34E-61 |
| REG1B   | 7  | 326.00 | 2.18E-67 |
| S100A16 | 3  | 38.70  | 3.96E-09 |
| SCARF2  | 8  | 180.12 | 1.84E-35 |
| SCG2    | 4  | 117.26 | 3.00E-25 |
| SEMA3F  | 6  | 168.95 | 1.22E-34 |
| SEMA4C  | 6  | 45.21  | 1.31E-08 |
| SFTPD   | 12 | 65.80  | 7.62E-10 |
| SLITRK2 | 11 | 22.54  | 1.26E-02 |
| SPINK5  | 7  | 40.67  | 3.37E-07 |
| STC1    | 6  | 197.29 | 1.08E-40 |
| TDGF1   | 2  | NA     | NA       |
| TGFBR2  | 8  | 108.75 | 1.67E-20 |
| ULBP2   | 8  | 327.41 | 8.38E-67 |
| VAMP5   | 2  | NA     | NA       |
| VTCN1   | 2  | NA     | NA       |

**Supplementary Table 31. Heterogeneity test of protein on healthspan.**

| Protein | No. of SNPs | <i>Q</i> statistic | <i>P</i> -val of <i>Q</i> statistic |
|---------|-------------|--------------------|-------------------------------------|
| FOXO3   | 1           | NA                 | NA                                  |
| GPNMB   | 6           | 113.95             | 5.99E-23                            |
| HLA-DRA | 3           | 1.29               | 5.24E-01                            |
| PLA2G7  | 8           | 15.97              | 2.54E-02                            |

**Supplementary Table 32. Heterogeneity test of protein on father's attained age.**

| Protein  | No. of SNPs | <i>Q</i> statistic | <i>P</i> -val of <i>Q</i> statistic |
|----------|-------------|--------------------|-------------------------------------|
| AGRP     | 9           | 68.91              | 8.08E-12                            |
| CA11     | 2           | NA                 | NA                                  |
| CCN1     | 11          | 115.51             | 4.10E-20                            |
| CD27     | 7           | 62.53              | 1.38E-11                            |
| CD74     | 6           | 36.35              | 8.08E-07                            |
| CDH1     | 6           | 11.08              | 4.98E-02                            |
| CEACAM21 | 2           | NA                 | NA                                  |

|         |    |       |          |
|---------|----|-------|----------|
| CPE     | 6  | 30.68 | 1.08E-05 |
| CXCL13  | 7  | 54.56 | 5.70E-10 |
| CXCL9   | 5  | 25.75 | 3.55E-05 |
| F3      | 8  | 4.36  | 7.37E-01 |
| FASLG   | 18 | 53.29 | 1.29E-05 |
| FES     | 1  | NA    | NA       |
| FURIN   | 3  | 4.72  | 9.44E-02 |
| GCNT1   | 4  | 48.76 | 1.46E-10 |
| GP1BA   | 14 | 41.85 | 6.94E-05 |
| GRN     | 10 | 15.78 | 7.16E-02 |
| GZMB    | 8  | 39.66 | 1.46E-06 |
| IGFBP1  | 2  | NA    | NA       |
| KIR2DL3 | 2  | NA    | NA       |
| LAIR1   | 3  | 25.64 | 2.71E-06 |
| LDLR    | 15 | 53.37 | 1.65E-06 |
| LEFTY2  | 3  | 14.54 | 6.97E-04 |
| LGALS9  | 3  | 35.69 | 1.78E-08 |
| LILRB4  | 2  | NA    | NA       |
| PAG1    | 6  | 36.71 | 6.83E-07 |
| PCSK9   | 8  | 27.93 | 2.26E-04 |
| POLR2F  | 1  | NA    | NA       |
| RP2     | 2  | NA    | NA       |
| SIT1    | 6  | 43.76 | 2.59E-08 |
| VCAM1   | 10 | 59.77 | 1.48E-09 |
| VSTM2L  | 2  | NA    | NA       |

**Supplementary Table 33. Heterogeneity test of protein on mother's attained age.**

| <b>Protein</b> | <b>No. of SNPs</b> | <b><i>Q</i> statistic</b> | <b><i>P</i>-val of <i>Q</i> statistic</b> |
|----------------|--------------------|---------------------------|-------------------------------------------|
| CDH1           | 6                  | 3.37                      | 6.43E-01                                  |
| CDH17          | 10                 | 15.02                     | 9.05E-02                                  |
| CDHR2          | 6                  | 283.66                    | 3.26E-59                                  |
| CPE            | 6                  | 17.55                     | 3.56E-03                                  |
| CXADR          | 5                  | 7.74                      | 1.01E-01                                  |
| CXCL9          | 5                  | 17.38                     | 1.63E-03                                  |
| F3             | 8                  | 9.46                      | 2.21E-01                                  |
| FOXO3          | 1                  | NA                        | NA                                        |
| GFAP           | 7                  | 252.84                    | 1.01E-51                                  |
| IL19           | 3                  | 5.17                      | 7.52E-02                                  |
| ITGB6          | 9                  | 24.14                     | 2.17E-03                                  |
| LAIR1          | 3                  | 10.44                     | 5.42E-03                                  |
| LEFTY2         | 3                  | 3.51                      | 1.73E-01                                  |
| LGALS9         | 3                  | 17.25                     | 1.79E-04                                  |
| LILRB4         | 2                  | NA                        | NA                                        |
| POLR2F         | 1                  | NA                        | NA                                        |
| RP2            | 2                  | NA                        | NA                                        |
| STC2           | 4                  | 11.75                     | 8.29E-03                                  |
| TNFRSF8        | 7                  | 38.97                     | 7.25E-07                                  |
